# Supplementary material
Source: PubMed Central journal article supplement (PMC7295166)
Supplement: NIHMS1596121-supplement-Supporting_Info.pdf [file NIHMS1596121-supplement-Supporting_Info.pdf]

# SUPPORTING INFORMATION

## Synthetic and Mechanistic Studies of a Versatile Heteroaryl Thioether Directing Group for Pd(II) Catalysis

Andrew M. Romine<sup>†</sup>, Kin S. Yang<sup>†</sup>, Malkanthi K. Karunananda<sup>†</sup>, Jason S. Chen<sup>‡</sup>, and Keary M. Engle<sup>\*†</sup>

\*keary@scripps.edu

[<sup>†</sup>] *Department of Chemistry, The Scripps Research Institute, 10550 North Torrey Pines Road, La Jolla, California 92037, United States*

[<sup>‡</sup>] *Automated Synthesis Facility, The Scripps Research Institute, 10550 North Torrey Pines Road, La Jolla, California 92037, United States*

### Table of Contents

|                                                                                       |      |
|---------------------------------------------------------------------------------------|------|
| <b>SYNTHETIC PROCEDURES</b> .....                                                     | S2   |
| <i>Starting Material Synthesis for Oxidative Heck Reaction</i> .....                  | S2   |
| <i>Characterization Data for Starting Materials for Oxidative Heck Reaction</i> ..... | S3   |
| <i>Oxidative Heck Reaction Design of Experiment</i> .....                             | S23  |
| <i>Directing Group Optimization for Oxidative Heck Reaction</i> .....                 | S27  |
| <i>Control Experiments on 8-Aminoquinoline Directed Oxidative Heck Reaction</i> ..... | S28  |
| <i>General Procedures for Oxidative Heck Reaction</i> .....                           | S29  |
| <i>Characterization Data for Oxidative Heck Products</i> .....                        | S30  |
| <i>Unsuccessful Substrates in Oxidative Heck Reaction Substrates</i> .....            | S51  |
| <i>Starting Material Procedures for C–H Functionalization</i> .....                   | S52  |
| <i>Characterization Data for Starting Materials for C–H Functionalization</i> .....   | S52  |
| <i>Directing Group Optimization for C–H Functionalization</i> .....                   | S61  |
| <i>General Procedures for C–H Functionalization</i> .....                             | S62  |
| <i>Characterization Data for C–H Functionalization Products</i> .....                 | S63  |
| <i>Characterization Data for Productive (BT)S Removal/Transformation</i> .....        | S79  |
| <i>Formal Synthesis of (+)-Salvianolic Acid A and Salvianolic Acid F</i> .....        | S84  |
| <i>Characterization Data for Total Synthesis</i> .....                                | S84  |
| <i>Preparation of Palladium Complexes</i> .....                                       | S90  |
| <b>KINETICS PROCEDURES</b> .....                                                      | S91  |
| <i>Kinetic Analysis of Oxidative Heck Reaction</i> .....                              | S91  |
| <i>Kinetic Analysis of C–H Olefination</i> .....                                      | S97  |
| <b>COMPUTATIONAL DETAILS</b> .....                                                    | S98  |
| <b>X-RAY CRYSTALLOGRAPHY</b> .....                                                    | S131 |
| <b>CYCLIC VOLTAMMETRY</b> .....                                                       | S246 |
| <b>REFERENCES</b> .....                                                               | S249 |
| <b>NMR SPECTRA</b> .....                                                              | S251 |

## GENERAL INFORMATION

Except where otherwise stated, all materials were used as received from commercial sources without further purification. All reactants, reagents, and solvents unless otherwise mentioned were purchased from Aldrich, Alfa Aesar, Oakwood, and Combi-Blocks. Grubbs Z-selective catalyst (C675) was donated by Umicore.<sup>1</sup> NMR spectra were recorded on AV-600 or Bruker AV-400 machines. Spectra were internally referenced to SiMe<sub>4</sub>, solvent signals, or internal standard. The following abbreviations (or combinations thereof) were used to explain multiplicities: s = singlet, d = doublet, t = triplet, q = quartet, p = pentet, m = multiplet. High-resolution mass spectra (HRMS) for new compounds were obtained with an Agilent LC/MSD TOF mass spectrometer.

## SYNTHETIC PROCEDURES

### Starting Material Synthesis for Oxidative Heck Reaction

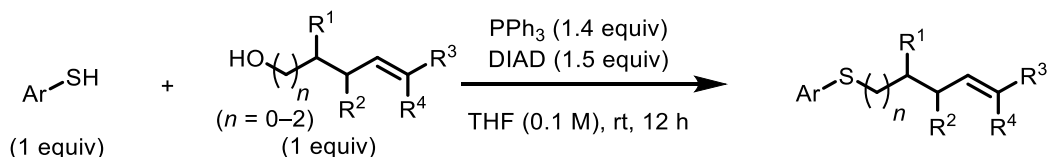

**Scheme S1.** General Procedure 1.

**General Procedure 1:** To a 50-mL round-bottom flask equipped with a magnetic stir bar and containing the alcohol (1.0 mmol, 1 equiv), thiol (1.0 mmol, 1 equiv), PPh<sub>3</sub> (1.4 mmol, 1.4 equiv), and THF (10 mL, 0.1 M) was added DIAD (1.5 mmol, 1.5 equiv) dropwise in air. The reaction was stirred at room temperature for 12 h. The organic materials were separated by addition of H<sub>2</sub>O (25 mL), followed by extraction with EtOAc (3 × 10 mL) and dried with Na<sub>2</sub>SO<sub>4</sub>. The solvent was removed *in vacuo*, and the crude residue was purified by SiO<sub>2</sub> gel column chromatography or preparative TLC.

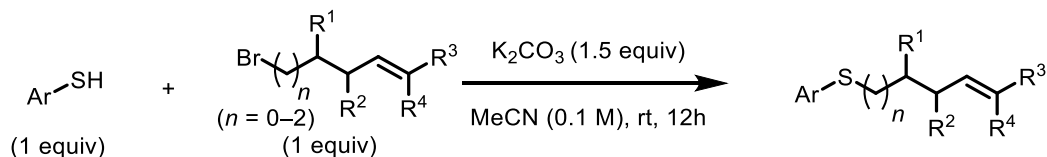

**Scheme S2.** General Procedure 2.

**General Procedure 2:** To a 50-mL round-bottom flask equipped with a magnetic stir bar were added the bromide (1.0 mmol, 1 equiv), thiol (1.0 mmol, 1 equiv), K<sub>2</sub>CO<sub>3</sub> (1.5 mmol, 1.5 equiv) and MeCN (10 mL, 0.1 M) in air. The reaction was stirred at room temperature for 12 h. The organic materials were separated by addition of H<sub>2</sub>O (25 mL), followed by extraction with EtOAc (3 × 10 mL) and dried with Na<sub>2</sub>SO<sub>4</sub>. The solvent was removed *in vacuo*, and the crude residue was purified by SiO<sub>2</sub> gel column chromatography or preparative TLC.

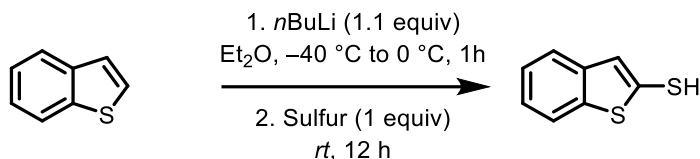

**Scheme S3.** Synthesis of Benzothiophene-2-thiol

### Synthesis of Benzothiophene-2-thiol

A flame dried 50-mL round-bottom flask equipped with a magnetic stir bar was charged with benzothiophene (5.0 mmol, 1 equiv) in dry diethyl ether (10 mL, 0.5 M) under nitrogen. The solution was cooled to  $-40\text{ }^{\circ}\text{C}$  and *n*BuLi (2.2 mL, 1.1 equiv; 2.5 M sol. in hexanes) was added and the reaction was allowed to warm in an ice bath at  $0\text{ }^{\circ}\text{C}$  for 1 h. Sulfur (5.0 mmol, 1 equiv) was added in one portion, and the reaction was allowed to slowly warm to room temperature over 12 h. 1 N HCl (10 mL) was added, and the reaction was stirred for 1 h. The organic material was extracted with ether, washed with brine, and dried over  $\text{Na}_2\text{SO}_4$ . The solvent was then removed *in vacuo* to give the desired benzothiophene-2-thiol.<sup>2</sup>

### Characterization Data for Starting Materials for Oxidative Heck Reaction

**(*E*)-hex-3-en-1-yl(phenyl)sulfane ((*E*)-I-B):** A flame dried 50-mL round-bottom flask equipped with a magnetic stir bar was charged with *p*-toluenesulfonyl chloride (10.00 mmol, 1 equiv) and sealed with a rubber septum. Chloroform (5 mL) and pyridine (1.3 mL) were added via syringe. The mixture was stirred for 5 min until the *p*-toluenesulfonyl chloride fully dissolved and the mixture turned yellow. (*E*)-Hex-3-en-1-ol (10 mmol, 1 equiv) was dissolved in chloroform (4 mL), and the resulting solution was added dropwise to the reaction. The reaction was allowed to stir at room temperature for 12 h. Diethyl ether (10 mL) was added, and the mixture was washed sequentially with 1 N HCl (50 mL), saturated aqueous  $\text{NaHCO}_3$  (50 mL), and brine (50 mL). The organic layer was dried over  $\text{MgSO}_4$ . After filtration the solvent was removed *in vacuo*, and the crude residue was purified by  $\text{SiO}_2$  gel column chromatography (10% EtOAc/hexanes) to give (*E*)-hex-3-en-1-yl 4-methylbenzenesulfonate, which was directly brought on to the next step.

To a flame-dried, 25-mL round-bottom flask equipped with a magnetic stir bar were added NaH (60% oil dispersion, 3.0 mmol, 3 equiv) and DMF (10 mL, 0.1 M) under nitrogen. The mixture was cooled to  $0\text{ }^{\circ}\text{C}$ . Thiophenol (0.900 mmol, 0.9 equiv) was added via syringe, followed by (*E*)-hex-3-en-1-yl 4-methylbenzenesulfonate (1.000 mmol, 1 equiv) in DMF (5 mL). The reaction was allowed to warm to room temperature and stirred for 20 h. The reaction was cooled to  $0\text{ }^{\circ}\text{C}$  and quenched with the addition of water and diethyl ether (5 mL, 1:1 mixture). The organic materials were separated by addition to  $\text{H}_2\text{O}$  (25 mL), followed by extraction with EtOAc ( $3 \times 10$  mL). The organic layer was dried with  $\text{Na}_2\text{SO}_4$ . After filtration the solvent was removed *in vacuo*, and the crude residue was purified by  $\text{SiO}_2$  gel column chromatography (10% EtOAc/hexanes). Purification afforded (*E*)-**I-B** as a clear liquid (96 mg, 50%).<sup>4</sup>  $^1\text{H NMR}$  (600 MHz,  $\text{CDCl}_3$ )  $\delta$  7.33 (dd,  $J = 8.2, 1.4$  Hz, 2H),

7.28 (t,  $J = 7.8$  Hz, 2H), 7.20–7.14 (m, 1H), 5.54 (dt,  $J = 15.2, 6.2, 1.3$  Hz, 1H), 5.44 (dt,  $J = 15.0, 6.7, 1.5$  Hz, 1H), 2.95 (t,  $J = 7.5$  Hz, 2H), 2.33 (q,  $J = 7.1$  Hz, 2H), 2.01 (p,  $J = 6.5$  Hz, 2H), 0.97 (t,  $J = 7.5$  Hz, 3H).  $^{13}\text{C}$  NMR (150 MHz,  $\text{CDCl}_3$ )  $\delta$  136.89, 134.21, 129.23, 128.96, 126.78, 125.90, 33.82, 32.48, 25.70, 13.86. HRMS calcd. for  $\text{C}_{12}\text{H}_{17}\text{S}^+$   $[\text{M}+\text{H}]^+$ : 193.1046, Found: 193.1040.

**(*E*)-(hex-3-en-1-ylsulfinyl)benzene ((*E*)-I-C):** A 25-mL round-bottom flask equipped with a magnetic stir bar was charged with (*E*)-hex-3-en-1-yl(phenyl)sulfane (0.5 mmol, 1 equiv) and DCM (5 mL, 0.1 M). The mixture was cooled to 0 ° C. A solution of mCPBA (0.5 mmol, 1 equiv) in DCM (5 mL, 0.1 M) was then added dropwise. The reaction was stirred for 4 h. The organic materials were separated by addition of NaOH in  $\text{H}_2\text{O}$  (0.2 M, 25 mL), followed by extraction with EtOAc (3 × 10 mL). The organic layer was dried over  $\text{Na}_2\text{SO}_4$ , and after filtration the solvent was removed *in vacuo*. The crude residue was purified by  $\text{SiO}_2$  gel column chromatography (40% EtOAc/hexanes). Purification afforded (*E*)-I-C as a white solid (84 mg, 81%).

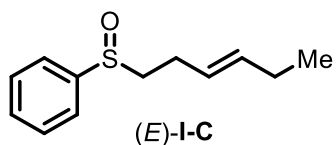

$^1\text{H}$  NMR (600 MHz,  $\text{CDCl}_3$ )  $\delta$  5.55 (dt,  $J = 15.2, 6.5$  Hz, 1H), 5.36 (dt,  $J = 15.1, 6.6$  Hz, 1H), 2.82 (dd,  $J = 8.6, 6.8$  Hz, 2H), 2.46 (dq,  $J = 15.2, 7.6$  Hz, 1H), 2.28 (dq,  $J = 14.5, 7.4$  Hz, 1H), 1.99 (p,  $J = 7.9, 7.4$  Hz, 2H), 0.94 (t,  $J = 7.5$  Hz, 3H).  $^{13}\text{C}$  NMR (150 MHz,  $\text{CDCl}_3$ )  $\delta$  144.01, 135.13, 131.06, 129.33, 125.17, 124.19, 57.17, 25.65, 25.36, 13.75. HRMS calcd. for  $\text{C}_{12}\text{H}_{17}\text{OS}^+$   $[\text{M}+\text{H}]^+$ : 209.0995, Found: 209.1007.

**(*E*)-hex-3-en-1-yl(*p*-tolyl)sulfane ((*E*)-I-D):** A flame dried 50-mL round-bottom flask equipped with a magnetic stir bar was charged with *p*-toluenesulfonyl chloride (10.00 mmol, 1 equiv) and sealed with a rubber septum. Chloroform (5 mL) and pyridine (1.3 mL) were added via syringe. The mixture was stirred for 5 min until the *p*-toluenesulfonyl chloride fully dissolved and the mixture turned yellow. (*E*)-Hex-3-en-1-ol (10 mmol, 1 equiv) was dissolved in chloroform (4 mL), and the resulting solution was added dropwise to the reaction. The reaction was allowed to stir at room temperature for 12 h. Diethyl ether (10 mL) was added, and the mixture was washed sequentially with 1 N HCl (50 mL), saturated aqueous  $\text{NaHCO}_3$  (50 mL), and brine (50 mL). The organic layer was dried over  $\text{MgSO}_4$ . After filtration the solvent was removed *in vacuo*, and the crude residue was purified by  $\text{SiO}_2$  gel column chromatography (10% EtOAc/hexanes) to give (*E*)-hex-3-en-1-yl 4-methylbenzenesulfonate, which was directly carried on to the next step.

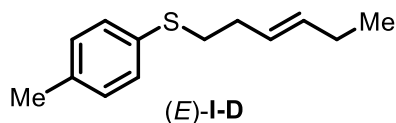

To a flame-dried, 25-mL round-bottom flask equipped with a magnetic stir bar were added NaH (60% oil dispersion, 3.0 mmol, 3 equiv) and DMF (10 mL, 0.1 M) under nitrogen. The mixture was cooled to 0 ° C. 4-Methylbenzenethiol (0.900 mmol, 0.9 equiv) was added followed by (*E*)-hex-3-en-1-yl 4-methylbenzenesulfonate (1.000 mmol, 1 equiv) in DMF (5 mL). The reaction was allowed to warm to room temperature and stirred for 20 h. The reaction was cooled to 0 ° C and quenched with the addition of water and diethyl ether (5 mL, 1:1 mixture). The organic materials were separated by addition to  $\text{H}_2\text{O}$  (25 mL), followed by extraction with EtOAc (3 × 10 mL). The organic layer was dried with  $\text{Na}_2\text{SO}_4$ . After filtration the solvent was removed *in vacuo*, and the crude residue

was purified by SiO<sub>2</sub> gel column chromatography (10% EtOAc/hexanes). Purification afforded (*E*)-**I-D** as a clear liquid (99 mg, 48%).<sup>4</sup> <sup>1</sup>H NMR (600 MHz, CDCl<sub>3</sub>) δ 7.28 (dd, *J* = 6.8, 1.6 Hz, 2H), 7.12 (d, *J* = 7.8 Hz, 2H), 5.54 (dt, *J* = 15.1, 6.1, 1.3 Hz, 1H), 5.45 (dt, *J* = 15.0, 6.6, 1.5 Hz, 1H), 2.99–2.84 (m, 2H), 2.34 (s, 3H), 2.33–2.29 (m, 2H), 2.03 (p, *J* = 6.5 Hz, 2H), 0.99 (t, *J* = 7.5 Hz, 3H). <sup>13</sup>C NMR (150 MHz, CDCl<sub>3</sub>) δ 136.12, 134.09, 132.97, 130.16, 129.75, 126.89, 34.57, 32.59, 25.70, 21.15, 13.88. HRMS calcd. for C<sub>13</sub>H<sub>19</sub>S<sup>+</sup> [M+H]<sup>+</sup>: 207.1202, Found: 207.1202.

(*E*)-1-(hex-3-en-1-ylsulfinyl)-4-methylbenzene ((*E*)-**I-E**): To a 25-mL round-bottom flask

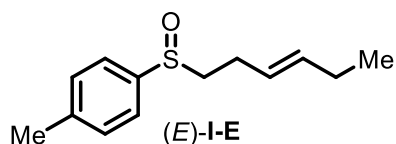

equipped with a magnetic stir bar was charged (*E*)-hex-3-en-1-yl(*p*-tolyl)sulfane (0.5 mmol, 1 equiv) and DCM (5 mL, 0.1 M). The mixture was cooled to 0 ° C. A solution of mCPBA (0.5 mmol, 1 equiv) in DCM (5 mL, 0.1 M) was then added dropwise. The

reaction was stirred for 4 h. The organic materials were separated by addition of NaOH in H<sub>2</sub>O (0.2 M, 25 mL), followed by extraction with EtOAc (3 × 10 mL). The solvent was removed *in vacuo*, and the crude residue was purified by SiO<sub>2</sub> gel column chromatography. The organic layer was dried over Na<sub>2</sub>SO<sub>4</sub>, and after filtration the crude residue was purified by SiO<sub>2</sub> gel column chromatography (40% EtOAc/hexanes). Purification afforded (*E*)-**I-E** as a white solid (89 mg, 80%). <sup>1</sup>H NMR (600 MHz, CDCl<sub>3</sub>) δ 7.51 (d, *J* = 8.2 Hz, 2H), 7.32 (d, *J* = 7.9 Hz, 2H), 5.55 (dt, *J* = 15.5, 6.4, 1.4 Hz, 1H), 5.36 (dt, *J* = 15.1, 6.8, 1.6 Hz, 1H), 2.86–2.73 (m, 2H), 2.48–2.36 (m, 4H), 2.28 (tt, *J* = 14.6, 8.4 Hz, 1H), 1.99 (p, *J* = 6.6 Hz, 2H), 0.94 (t, *J* = 7.4 Hz, 3H). <sup>13</sup>C NMR (150 MHz, CDCl<sub>3</sub>) δ 141.54, 140.72, 135.02, 130.03, 125.26, 124.26, 57.20, 25.66, 25.40, 21.55, 13.76. HRMS calcd. for C<sub>13</sub>H<sub>19</sub>OS<sup>+</sup> [M+H]<sup>+</sup>: 223.1151, Found: 223.1166.

(*E*)-2-(hex-3-en-1-ylthio)-4,5-dihydrothiazole ((*E*)-**I-F**): The title compound was prepared on a

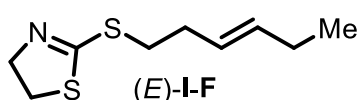

0.300 mmol scale according to General Procedure 1. The crude residue was purified by SiO<sub>2</sub> gel column chromatography (5% Et<sub>2</sub>O/hexanes). Purification afforded (*E*)-**I-F** as a clear liquid (37 mg,

61%). <sup>1</sup>H NMR (600 MHz, CDCl<sub>3</sub>) δ 5.55 (dt, *J* = 15.3, 6.2, 1.4 Hz, 1H), 5.40 (dt, *J* = 15.1, 6.7, 1.6 Hz, 1H), 4.21 (t, *J* = 7.9 Hz, 2H), 3.37 (t, *J* = 7.9 Hz, 2H), 3.13 (t, *J* = 7.4 Hz, 2H), 2.38 (q, *J* = 6.5 Hz, 2H), 2.01 (dq, *J* = 7.7, 6.1 Hz, 2H), 0.96 (t, *J* = 7.5 Hz, 3H). <sup>13</sup>C NMR (150 MHz, CDCl<sub>3</sub>) δ 165.80, 134.60, 126.33, 64.48, 35.49, 32.88, 32.43, 25.67, 13.82. HRMS calcd. for C<sub>9</sub>H<sub>16</sub>NS<sub>2</sub><sup>+</sup> [M+H]<sup>+</sup>: 202.0719, Found: 202.0725.

(*E*)-5-(hex-3-en-1-ylthio)-1-phenyl-1H-tetrazole ((*E*)-**I-G**): The title compound was prepared

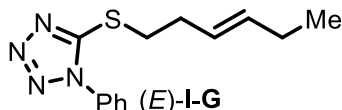

according to General Procedure 1. The crude residue was purified by SiO<sub>2</sub> gel column chromatography (10% Et<sub>2</sub>O/hexanes). Purification

afforded (*E*)-**I-G** as a clear liquid (96 mg, 37%). <sup>1</sup>H NMR (600 MHz, CDCl<sub>3</sub>) δ 7.63–7.52 (m, 5H), 5.61 (dt, *J* = 15.4, 6.3, 1.4 Hz, 1H), 5.44 (dt, *J* = 15.2, 6.8, 1.6 Hz, 1H), 3.45 (t, *J* = 7.3 Hz, 2H), 2.54 (qd, *J* = 7.2, 1.2 Hz, 2H), 2.03 (dtdd, *J* = 8.9, 7.5, 6.2, 1.3 Hz, 2H), 0.98 (t, *J* = 7.5 Hz, 3H). <sup>13</sup>C NMR (150 MHz, CDCl<sub>3</sub>) δ 154.54, 135.47, 133.89, 130.20, 129.90,

125.56, 124.00, 33.49, 32.23, 25.65, 13.77. **HRMS** calcd. for C<sub>13</sub>H<sub>17</sub>N<sub>4</sub>S [M+H]<sup>+</sup>: 261.1169, Found: 261.1157.

**(E)-2-(hex-3-en-1-ylthio)-1H-benzimidazole ((E)-I-H)**: The title compound was prepared

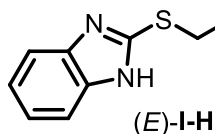

according to General Procedure 1. The crude residue was purified by SiO<sub>2</sub> gel column chromatography (10% EtOAc/hexanes). Purification afforded (*E*)-**I-H** as a white solid (34 mg, 49%). <sup>1</sup>H NMR (600 MHz, CDCl<sub>3</sub>) δ 7.60–7.45 (m, 2H), 7.22–7.15 (m, 2H), 5.58–5.50 (m, 1H), 5.44–5.36 (m, 1H), 3.36 (td, *J* = 7.3, 1.4 Hz, 2H), 2.50–2.41 (m, 2H), 2.03–1.88 (m, 2H), 0.93 (td, *J* = 7.3, 2.8 Hz, 3H). <sup>13</sup>C NMR (150 MHz, CDCl<sub>3</sub>) δ 150.65, 150.57, 134.84, 126.17, 126.16, 122.42, 32.85, 32.72, 25.65, 13.78. **HRMS** calcd. for C<sub>13</sub>H<sub>17</sub>N<sub>2</sub>S<sup>+</sup> [M+H]<sup>+</sup>: 233.1107, Found: 233.1114.

**(E)-2-(hex-3-en-1-ylthio)benzooxazole ((E)-I-I)**: The title compound was prepared according to

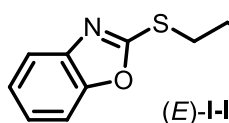

General Procedure 1 on a 0.500 mmol scale. The crude residue was purified by SiO<sub>2</sub> gel column chromatography (5% Et<sub>2</sub>O/hexanes). Purification afforded (*E*)-**I-I** as a clear liquid (53 mg, 45%). <sup>1</sup>H NMR (600 MHz, CDCl<sub>3</sub>) δ 7.59 (d, *J* = 1.2 Hz, 1H), 7.43 (d, *J* = 8.2 Hz, 1H), 7.29 – 7.26 (m, 1H), 7.23 (td, *J* = 7.7, 1.4 Hz, 1H), 5.61 (dtt, *J* = 15.2, 6.3, 1.2 Hz, 1H), 5.50 – 5.41 (m, 1H), 3.34 (t, *J* = 7.3 Hz, 2H), 2.52 (qd, *J* = 7.1, 1.1 Hz, 2H), 2.07 – 1.88 (m, 2H), 0.97 (t, *J* = 7.5 Hz, 3H). <sup>13</sup>C NMR (150 MHz, CDCl<sub>3</sub>) δ 165.28, 151.95, 142.16, 135.24, 125.87, 124.36, 123.90, 118.49, 109.96, 32.43, 25.68, 13.78. **HRMS** calcd. for C<sub>13</sub>H<sub>15</sub>NOS<sup>+</sup> [M+H]<sup>+</sup>: 234.0953, Found: 234.0958.

**(E)-2-(hex-3-en-1-ylthio)benzothiophene ((E)-I-J)**: A flame dried 50-mL round-bottom flask

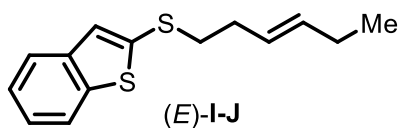

equipped with a magnetic stir bar was charged with *p*-toluenesulfonyl chloride (10.00 mmol, 1 equiv) and sealed with a rubber septum. Chloroform (5 mL) and pyridine (1.3 mL) were added via syringe. The mixture was stirred for 5 min until the *p*-toluenesulfonyl chloride fully dissolved and the mixture turned yellow. (*Z*)-Hex-3-en-1-ol (10 mmol, 1 equiv) was dissolved in chloroform (4 mL), and the resulting solution was added dropwise to the reaction. The reaction was allowed to stir at room temperature for 12 h. Diethyl ether (10 mL) was added, and the mixture was washed sequentially with 1 N HCl (50 mL), saturated aqueous NaHCO<sub>3</sub> (50 mL), and brine (50 mL). The organic layer was dried over MgSO<sub>4</sub>. After filtration the solvent was removed *in vacuo*, and the crude residue was purified by SiO<sub>2</sub> gel column chromatography (10% EtOAc/hexanes) to give (*E*)-hex-3-en-1-yl 4-methylbenzenesulfonate, which was directly carried on to the next step.

To a flame-dried, 25-mL round-bottom flask equipped with a magnetic stir bar were added NaH (60% oil dispersion, 2.0 mmol, 3 equiv) and DMF (10 mL, 0.2 M) under nitrogen. The mixture was cooled to 0 ° C. Benzothiophene-2-thiol (2.00 mmol, 1 equiv) was added followed by (*E*)-hex-3-en-

1-yl 4-methylbenzenesulfonate (2.45 mmol, 1.2 equiv) in DMF (5 mL). The reaction was allowed to warm to room temperature and stirred for 20 h. The reaction was cooled to 0 °C and quenched with the addition of water and diethyl ether (5 mL, 1:1 mixture). The organic materials were separated by addition to H<sub>2</sub>O (25 mL), followed by extraction with EtOAc (3 × 10 mL). The organic layer was dried with Na<sub>2</sub>SO<sub>4</sub>. After filtration the solvent was removed *in vacuo*, and the crude residue was purified by SiO<sub>2</sub> gel column chromatography (10% EtOAc/hexanes). Purification afforded (*E*)-**I-J** as a pink liquid (190 mg, 38%). <sup>1</sup>H NMR (600 MHz, CDCl<sub>3</sub>) δ 7.74 (d, *J* = 8.0 Hz, 1H), 7.68 (dd, *J* = 7.4, 1.4 Hz, 1H), 7.35 – 7.27 (m, 3H), 5.55 (dtt, *J* = 15.2, 6.2, 1.4 Hz, 1H), 5.42 (dtt, *J* = 15.1, 6.8, 1.6 Hz, 1H), 2.96 (t, *J* = 7.5 Hz, 2H), 2.43 – 2.31 (m, 2H), 2.02 (qdd, *J* = 7.6, 6.2, 1.4 Hz, 2H), 0.97 (t, *J* = 7.5 Hz, 3H). <sup>13</sup>C NMR (150 MHz, CDCl<sub>3</sub>) δ 141.75, 139.97, 137.51, 134.59, 128.07, 126.34, 124.56, 124.41, 123.09, 121.96, 37.61, 32.81, 25.70, 13.84. HRMS calcd. for C<sub>14</sub>H<sub>17</sub>S<sub>2</sub><sup>+</sup> [M+H]<sup>+</sup>: 249.0772, Found: 249.0770.

(*E*)-2-(hex-3-en-1-ylthio)benzothiazole ((*E*)-**I-K**): The title compound was prepared according to

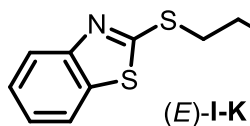

General Procedure 1. The crude residue was purified by SiO<sub>2</sub> gel column chromatography (5% Et<sub>2</sub>O/hexanes). Purification afforded (*E*)-**I-K** as a clear liquid (249 mg, >95%). <sup>1</sup>H NMR (600 MHz, CDCl<sub>3</sub>) δ 7.87 (d, *J* = 8.2 Hz, 1H), 7.75 (d, *J* = 8.0 Hz, 1H),

7.41 (t, *J* = 7.6 Hz, 1H), 7.29 (t, *J* = 7.6 Hz, 1H), 5.61 (dt, *J* = 15.1, 6.3 Hz, 1H), 5.47 (dt, *J* = 15.0, 6.7 Hz, 1H), 3.38 (t, *J* = 7.4 Hz, 2H), 2.52 (q, *J* = 7.2 Hz, 2H), 2.03 (p, *J* = 7.0 Hz, 2H), 0.98 (t, *J* = 7.4 Hz, 3H). <sup>13</sup>C NMR (150 MHz, CDCl<sub>3</sub>) δ 167.31, 153.50, 135.33, 135.01, 126.12, 126.10, 124.25, 121.60, 121.04, 33.75, 32.41, 25.69, 13.80. HRMS calcd. for C<sub>13</sub>H<sub>16</sub>NS<sub>2</sub><sup>+</sup> [M+H]<sup>+</sup>: 250.0719, Found: 250.0724.

(*E*)-2-((hex-3-en-1-yl-3,4-d<sub>2</sub>)thio)benzothiazole ((*E*)-**I-d<sub>2</sub>**): To a dry 2-necked, 250 mL round-

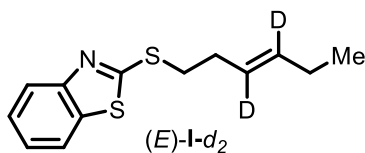

bottom flask equipped with a stir bar was added lithium aluminum deuteride (10.2 mmol, 2 equiv). The flask was fitted with an addition funnel and a reflux condenser. The apparatus was purged with nitrogen and dry THF (50 mL, 0.1 M) was added. The solution was then cooled to 0 °C while stirring. To the closed addition funnel

under nitrogen was added 3-hexyn-1-ol (5.1 mmol, 1 equiv) and THF (10 mL, 0.5 M). The addition funnel was then opened and washed with THF (5 mL). The reaction was allowed to warm to room temperature over 1 h. The reaction was then heated to 70 °C for 72 h. The reaction was cooled in an ice bath and then quenched by addition of D<sub>2</sub>O (10 mL). Et<sub>2</sub>O (10 mL) was added and the layers were separated. The aqueous layer was extracted with Et<sub>2</sub>O (3 × 10 mL). The organic solution was washed with brine (10 mL) and dried over Na<sub>2</sub>SO<sub>4</sub>.<sup>3</sup> After filtration, the solvent was removed *in vacuo* to afford the crude material that was used directly in the next step.

The title compound was then prepared according to General Procedure 1 on a 5.1 mmol scale using the crude material from above as the alcohol. The crude residue was purified by SiO<sub>2</sub> gel column chromatography (5% Et<sub>2</sub>O/hexanes). Purification afforded (*E*)-**I-d<sub>2</sub>** as a clear liquid (120 mg, 10%). <sup>1</sup>H NMR (600 MHz, CDCl<sub>3</sub>) δ 7.87 (d, *J* = 8.1 Hz, 1H), 7.75 (dd, *J* = 8.1, 1.2 Hz, 1H), 7.41 (ddd, *J* = 8.3, 7.2, 1.2 Hz, 1H), 7.31 – 7.27 (m, 1H), 3.38 (t, *J* = 7.3 Hz, 2H), 2.51 (t, *J* = 7.4 Hz, 2H), 2.02

(q,  $J = 7.4$  Hz, 2H), 0.98 (t,  $J = 7.5$  Hz, 3H).  $^{13}\text{C}$  NMR (150 MHz,  $\text{CDCl}_3$ )  $\delta$  167.34, 153.50, 135.33, 134.70, 134.55, 134.40, 126.13, 125.80, 125.65, 125.50, 124.25, 121.60, 121.05, 33.72, 32.24, 25.51, 13.75. HRMS calcd. for  $\text{C}_{13}\text{H}_{14}\text{D}_2\text{NS}_2^+$   $[\text{M}+\text{H}]^+$ : 252.0850, Found: 252.0851.

**(E)-2-(hex-3-en-1-ylthio)thiazolo[5,4-b]pyridine ((E)-I-L):** The title compound was prepared on

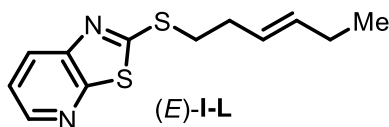

an 0.300 mmol scale according to General Procedure 1. The crude residue was purified by preparative TLC (10% EtOAc/hexanes).

Purification afforded (E)-I-L as a yellow liquid (74 mg, >95%).

$^1\text{H}$  NMR (600 MHz,  $\text{CDCl}_3$ )  $\delta$  8.43 (dd,  $J = 4.7, 1.6$  Hz, 1H), 8.05 (dd,  $J = 8.2, 1.6$  Hz, 1H), 7.34 (dd,  $J = 8.2, 4.7$  Hz, 1H), 5.62 (dtt,  $J = 15.3, 6.2, 1.4$  Hz, 1H), 5.46 (dtt,  $J = 15.3, 6.9, 1.6$  Hz, 1H), 3.39 (t,  $J = 7.3$  Hz, 2H), 2.52 (q,  $J = 7.1, 6.7$  Hz, 2H), 2.03 (ddd,  $J = 12.4, 7.0, 3.8$  Hz, 2H), 0.98 (t,  $J = 7.4$  Hz, 3H).  $^{13}\text{C}$  NMR (150 MHz,  $\text{CDCl}_3$ )  $\delta$  168.99, 158.88, 146.61, 145.67, 135.22, 127.94, 125.92, 121.23, 33.09, 32.30, 25.69, 13.79. HRMS calcd. for  $\text{C}_{12}\text{H}_{15}\text{N}_2\text{S}_2^+$   $[\text{M}+\text{H}]^+$ : 251.0671, Found: 251.0687

**(E)-5-chloro-2-(hex-3-en-1-ylthio)benzothiazole ((E)-I-M):** The title compound was prepared on

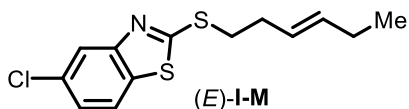

a 0.300 mmol scale according to General Procedure 1. The crude residue was purified by  $\text{SiO}_2$  gel column chromatography (5% Et<sub>2</sub>O/hexanes).

Purification afforded (E)-I-M as a clear liquid (82

mg, >95%).  $^1\text{H}$  NMR (600 MHz,  $\text{CDCl}_3$ )  $\delta$  7.84 (d,  $J = 2.0$  Hz, 1H), 7.64 (d,  $J = 8.5$  Hz, 1H), 7.26 (dd,  $J = 8.5, 2.0$  Hz, 1H), 5.61 (dtt,  $J = 15.3, 6.3, 1.4$  Hz, 1H), 5.46 (dtt,  $J = 15.2, 6.8, 1.6$  Hz, 1H), 3.37 (t,  $J = 7.3$  Hz, 2H), 2.51 (qd,  $J = 7.1, 1.2$  Hz, 2H), 2.03 (qdq,  $J = 7.4, 6.3, 1.2$  Hz, 2H), 0.98 (t,  $J = 7.5$  Hz, 3H).  $^{13}\text{C}$  NMR (150 MHz,  $\text{CDCl}_3$ )  $\delta$  169.60, 154.31, 135.15, 133.56, 132.20, 125.96, 124.58, 121.64, 121.49, 33.75, 32.34, 25.69, 13.79. HRMS calcd. for  $\text{C}_{13}\text{H}_{15}\text{ClNS}_2^+$   $[\text{M}+\text{H}]^+$ : 284.0329, Found: 284.0337.

**(E)-6-ethoxy-2-(hex-3-en-1-ylthio)benzothiazole ((E)-I-N):** The title compound was prepared on

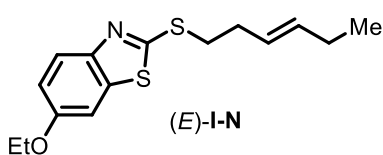

a 0.300 mmol scale according to General Procedure 1. The crude residue was purified by  $\text{SiO}_2$  gel column chromatography (5% Et<sub>2</sub>O/hexanes).

Purification afforded (E)-I-N as a clear liquid (85

mg, >95%).  $^1\text{H}$  NMR (600 MHz,  $\text{CDCl}_3$ )  $\delta$  7.74 (d,  $J = 8.9$  Hz, 1H), 7.22 (d,  $J = 2.6$  Hz, 1H), 7.00 (dd,  $J = 8.9, 2.6$  Hz, 1H), 5.60 (dtt,  $J = 15.3, 6.2, 1.3$  Hz, 1H), 5.46 (dtt,  $J = 15.1, 6.8, 1.6$  Hz, 1H), 4.07 (q,  $J = 7.0$  Hz, 2H), 3.33 (t,  $J = 7.4$  Hz, 2H), 2.49 (q,  $J = 7.2, 6.7$  Hz, 2H), 2.03 (q,  $J = 6.0$  Hz, 2H), 1.44 (t,  $J = 7.0$  Hz, 3H), 0.97 (t,  $J = 7.5$  Hz, 3H).  $^{13}\text{C}$  NMR (150 MHz,  $\text{CDCl}_3$ )  $\delta$  163.89, 156.47, 148.01, 136.68, 134.93, 126.16, 122.08, 115.34, 104.97, 64.27, 33.94, 32.50, 25.70, 15.00, 13.81. HRMS calcd. for  $\text{C}_{15}\text{H}_{20}\text{NOS}_2^+$   $[\text{M}+\text{H}]^+$ : 294.0981, Found: 294.0985.



**(E)-2-(hex-3-en-1-ylthio)-5-(trifluoromethoxy)benzothiazole ((E)-I-O):** The title compound was prepared on a 0.300 mmol scale according to General Procedure 1. The crude residue was purified by SiO<sub>2</sub> gel column chromatography (5% Et<sub>2</sub>O/hexanes). Purification afforded (E)-I-O as a clear liquid (99 mg, >95%).

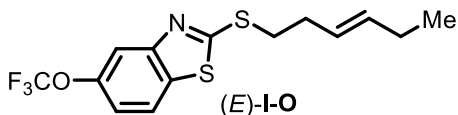

<sup>1</sup>H NMR (600 MHz, CDCl<sub>3</sub>) δ 7.81–7.66 (m, 2H), 7.17 (dd, *J* = 8.8, 2.3 Hz, 1H), 5.61 (dtt, *J* = 15.3, 6.3, 1.3 Hz, 1H), 5.46 (dtt, *J* = 15.2, 6.9, 1.6 Hz, 1H), 3.39 (t, *J* = 7.3 Hz, 2H), 2.52 (q, *J* = 7.1, 6.6 Hz, 2H), 2.03 (p, *J* = 7.5 Hz, 2H), 0.98 (t, *J* = 7.4 Hz, 3H). <sup>13</sup>C NMR (150 MHz, CDCl<sub>3</sub>) δ 170.38, 154.12, 147.96, 135.18, 134.75, 133.65, 125.94, 125.69, 121.61, 121.56, 119.85, 117.67, 114.10, 33.75, 32.32, 25.69, 13.79. <sup>19</sup>F NMR (376 MHz, CDCl<sub>3</sub>) δ -58.99. HRMS calcd. for C<sub>14</sub>H<sub>15</sub>F<sub>3</sub>NOS<sub>2</sub><sup>+</sup> [M+H]<sup>+</sup>: 334.0542, Found: 334.0556.

**(E)-2-(hex-3-en-1-ylsulfinyl)benzothiazole ((E)-I-P):** To a 25-mL round-bottom flask equipped with a magnetic stir bar was charged (E)-2-(hex-3-en-1-ylsulfinyl)benzothiazole (0.5 mmol, 1 equiv) and DCM (5 mL, 0.1 M). The mixture was cooled to 0 °C. A solution of mCPBA (0.5 mmol, 1 equiv) in DCM (5 mL, 0.1 M) was then added dropwise.

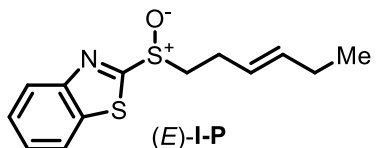

The reaction was stirred for 4 h. The organic materials were separated by addition of H<sub>2</sub>O (25 mL), followed by extraction with EtOAc (3 × 10 mL). The organic layer was dried over Na<sub>2</sub>SO<sub>4</sub>, and after filtration the solvent was removed *in vacuo*. The crude residue was purified by SiO<sub>2</sub> gel column chromatography (40% EtOAc/hexanes). Purification afforded (E)-I-P as a white solid (111 mg, 80%). <sup>1</sup>H NMR (600 MHz, CDCl<sub>3</sub>) δ 8.06 (d, *J* = 8.2 Hz, 1H), 8.00 (d, *J* = 7.2 Hz, 1H), 7.56 (ddd, *J* = 8.3, 7.1, 1.3 Hz, 1H), 7.49 (ddd, *J* = 8.3, 7.1, 1.2 Hz, 1H), 5.61 (dtt, *J* = 15.4, 6.3, 1.4 Hz, 1H), 5.39 (dtt, *J* = 15.1, 6.7, 1.6 Hz, 1H), 3.29 (ddd, *J* = 13.2, 9.2, 6.8 Hz, 1H), 3.22 (ddd, *J* = 13.3, 9.0, 5.5 Hz, 1H), 2.79–2.57 (m, 1H), 2.49–2.37 (m, 1H), 1.97 (p, *J* = 6.6 Hz, 2H), 0.93 (t, *J* = 7.5 Hz, 3H). <sup>13</sup>C NMR (150 MHz, CDCl<sub>3</sub>) δ 177.88, 154.08, 136.14, 135.85, 127.05, 126.27, 124.47, 124.05, 122.41, 56.58, 25.62, 24.79, 13.62. HRMS calcd. for C<sub>13</sub>H<sub>16</sub>NOS<sub>2</sub><sup>+</sup> [M+H]<sup>+</sup>: 266.0668, Found: 266.0682.

**(E)-2-(hex-3-en-1-ylsulfonyl)benzothiazole ((E)-I-Q):** To a 100-mL round-bottom flask equipped with a magnetic stir bar were added (E)-2-(hex-3-en-1-ylthio)benzothiazole (0.300 mmol, 1 equiv), 30% aqueous H<sub>2</sub>O<sub>2</sub> (0.6 mL, 6 equiv), ammonium heptamolybdate tetrahydrate (0.006 mmol, 1 mol%), and ethanol (5.0 mL, 0.06 M). The reaction was stirred at room temperature for 12 h. The organic materials were separated by

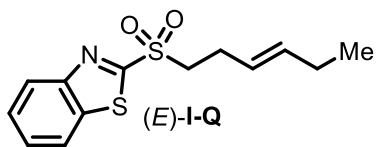

addition of H<sub>2</sub>O (20 mL), followed by extraction with EtOAc (3 × 10 mL). The organic solution was washed with brine (10 mL) and dried over Na<sub>2</sub>SO<sub>4</sub>. After filtration, the solvent was removed *in vacuo*, and (E)-I-Q was obtained as a white solid (81 mg, >95%). <sup>1</sup>H NMR (600 MHz, CDCl<sub>3</sub>) δ 8.22 (d, *J* = 8.2 Hz, 1H), 8.02 (d, *J* = 8.0 Hz, 1H), 7.62 (dt, *J* = 27.8, 7.2 Hz, 2H), 5.55 (dtt, *J* = 15.4, 6.3, 1.4 Hz, 1H), 5.31 (dddd, *J* = 15.2, 6.7, 5.0, 1.6 Hz, 1H), 3.59–3.51 (m, 2H), 2.58 (q, *J* = 6.9 Hz, 2H), 1.91 (p, *J* = 6.6 Hz, 2H), 0.87 (t, *J* = 7.5 Hz, 3H). <sup>13</sup>C NMR (150 MHz, CDCl<sub>3</sub>) δ 166.01,

152.89, 136.95, 135.78, 128.15, 127.78, 125.60, 123.57, 122.46, 54.73, 25.72, 25.49, 13.47. **HRMS** calcd. for  $C_{13}H_{16}NO_2S_2^+$   $[M+H]^+$ : 282.0617, Found: 282.0622.

**(Z)-hex-3-en-1-yl(phenyl)sulfane ((Z)-I-B):** A flame dried 50-mL round-bottom flask equipped

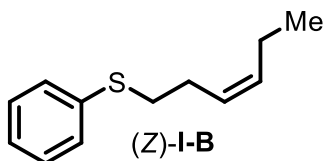

with a magnetic stir bar was charged with *p*-toluenesulfonyl chloride (10.00 mmol, 1 equiv) and sealed with a rubber septum. Chloroform (5 mL) and pyridine (1.3 mL) were added via syringe. The mixture was stirred for 5 min until the *p*-toluenesulfonyl chloride fully dissolved and the mixture turned yellow. (*E*)-Hex-3-en-1-ol (10 mmol, 1 equiv) was

dissolved in chloroform (4 mL), and the resulting solution was added dropwise to the reaction. The reaction was allowed to stir at room temperature for 12 h. Diethyl ether (10 mL) was added, and the mixture was washed sequentially with 1 N HCl (50 mL), saturated aqueous  $NaHCO_3$  (50 mL), and brine (50 mL). The organic layer was dried over  $MgSO_4$ . After filtration the solvent was removed *in vacuo*, and the crude residue was purified by  $SiO_2$  gel column chromatography (10% EtOAc/hexanes) to give (*Z*)-hex-3-en-1-yl 4-methylbenzenesulfonate, which was directly carried on to the next step.

To a flame-dried, 25-mL round-bottom flask equipped with a magnetic stir bar were added NaH (60% oil dispersion, 3.0 mmol, 3 equiv) and DMF (10 mL, 0.1 M) under nitrogen. The mixture was cooled to 0 °C. Thiophenol (0.900 mmol, 0.9 equiv) was added via syringe, followed by (*Z*)-hex-3-en-1-yl 4-methylbenzenesulfonate (1.000 mmol, 1 equiv) in DMF (5 mL). The reaction was allowed to warm to room temperature and stirred for 20 h. The reaction was cooled to 0 °C and quenched with the addition of water and diethyl ether (5 mL, 1:1 mixture). The organic materials were separated by addition to  $H_2O$  (25 mL), followed by extraction with EtOAc ( $3 \times 10$  mL). The organic layer was dried with  $Na_2SO_4$ . After filtration the solvent was removed *in vacuo*, and the crude residue was purified by  $SiO_2$  gel column chromatography (10% EtOAc/hexanes). Purification afforded (*Z*)-**I-B** as a clear liquid (67 mg, 35%).<sup>4</sup>  **$^1H$  NMR** (600 MHz,  $CDCl_3$ )  $\delta$  7.34 (d,  $J = 7.8$  Hz, 2H), 7.28 (t,  $J = 7.7$  Hz, 2H), 7.18 (t,  $J = 7.3$  Hz, 1H), 5.47 (dd,  $J = 12.2, 5.7$  Hz, 1H), 5.38 (dt,  $J = 10.1, 7.4$  Hz, 1H), 2.94 (t,  $J = 7.5$  Hz, 2H), 2.38 (q,  $J = 7.4$  Hz, 2H), 2.02 (p,  $J = 7.5$  Hz, 2H), 0.96 (t,  $J = 7.6$  Hz, 3H).  **$^{13}C$  NMR** (150 MHz,  $CDCl_3$ )  $\delta$  136.74, 133.77, 129.23, 128.98, 126.54, 125.96, 33.73, 27.04, 20.78, 14.38. **HRMS** calcd. for  $C_{12}H_{17}S^+$   $[M+H]^+$ : 193.1046, Found: 193.1041.

**(Z)-(hex-3-en-1-ylsulfinyl)benzene ((Z)-I-C):** To a 25-mL round-bottom flask equipped with a

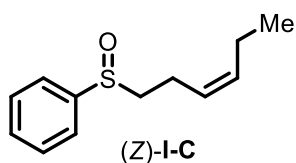

magnetic stir bar was charged (*Z*)-hex-3-en-1-yl(phenyl)sulfane (0.5 mmol, 1 equiv) and DCM (5 mL, 0.1 M). The mixture was cooled to 0 °C. A solution of mCPBA (0.5 mmol, 1 equiv) in DCM (5 mL, 0.1 M) was then added dropwise. The reaction was stirred for 4 h. The organic materials were separated by addition of NaOH in  $H_2O$  (0.2 M, 25 mL),

followed by extraction with EtOAc ( $3 \times 10$  mL). The organic layer was dried over  $Na_2SO_4$ , and after filtration the solvent was removed *in vacuo*. The crude residue was purified by  $SiO_2$  gel column chromatography (40% EtOAc/hexanes). Purification afforded (*Z*)-**I-C** as a white solid (87 mg, 84%).  **$^1H$  NMR** (600 MHz,  $CDCl_3$ )  $\delta$  7.67–7.59 (m, 2H), 7.55–7.45 (m, 3H), 5.48 (dtt,  $J = 10.6, 7.3, 1.6$

Hz, 1H), 5.31 (dtt,  $J = 10.8, 7.3, 1.7$  Hz, 1H), 2.81 (t,  $J = 7.6$  Hz, 2H), 2.53 (dq,  $J = 15.3, 7.8$  Hz, 1H), 2.32 (dq,  $J = 14.1, 7.0$  Hz, 1H), 2.01 (p,  $J = 7.5$  Hz, 2H), 0.94 (t,  $J = 7.5$  Hz, 3H).  $^{13}\text{C NMR}$  (150 MHz,  $\text{CDCl}_3$ )  $\delta$  143.91, 134.74, 131.10, 129.35, 124.85, 124.18, 57.15, 20.69, 20.27, 14.22. **HRMS** calcd. for  $\text{C}_{12}\text{H}_{17}\text{OS}^+$   $[\text{M}+\text{H}]^+$ : 209.0995, Found: 209.1010.

**(Z)-hex-3-en-1-yl(*p*-tolyl)sulfane ((Z)-I-D):** A flame dried 50-mL round-bottom flask equipped with a magnetic stir bar was charged with *p*-toluenesulfonyl chloride (10.00 mmol, 1 equiv) and sealed with a rubber septum. Chloroform (5 mL) and pyridine (1.3 mL) were added via syringe. The mixture was stirred for 5 min until the *p*-toluenesulfonyl chloride fully dissolved and the mixture turned yellow. (*E*)-Hex-3-en-1-ol (10 mmol, 1 equiv) was dissolved in chloroform (4 mL), and the resulting solution was added dropwise to the reaction. The reaction was allowed to stir at room temperature for 12 h. Diethyl ether (10 mL) was added, and the mixture was washed sequentially with 1 N HCl (50 mL), saturated aqueous  $\text{NaHCO}_3$  (50 mL), and brine (50 mL). The organic layer was dried over  $\text{MgSO}_4$ . After filtration the solvent was removed *in vacuo*, and the crude residue was purified by  $\text{SiO}_2$  gel column chromatography (10% EtOAc/hexanes) to give (Z)-hex-3-en-1-yl 4-methylbenzenesulfonate, which was directly carried on to the next step.

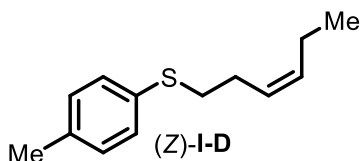

To a flame-dried, 25-mL round-bottom flask equipped with a magnetic stir bar were added NaH (60% oil dispersion, 3.0 mmol, 3 equiv) and DMF (10 mL, 0.1 M) under nitrogen. The mixture was cooled to 0 ° C. 4-Methylbenzenethiol (0.900 mmol, 0.9 equiv) was added followed by (Z)-hex-3-en-1-yl 4-methylbenzenesulfonate (1.000 mmol, 1 equiv) in DMF (5 mL). The reaction was allowed to warm to room temperature and stirred for 20 h. The reaction was cooled to 0 ° C and quenched with the addition of water and diethyl ether (5 mL, 1:1 mixture). The organic materials were separated by addition to  $\text{H}_2\text{O}$  (25 mL), followed by extraction with EtOAc (3  $\times$  10 mL). The organic layer was dried with  $\text{Na}_2\text{SO}_4$ . After filtration the solvent was removed *in vacuo*, and the crude residue was purified by  $\text{SiO}_2$  gel column chromatography (10% EtOAc/hexanes). Purification afforded (Z)-I-D as a clear liquid (76 mg, 37%).  $^1\text{H NMR}$  (600 MHz,  $\text{CDCl}_3$ )  $\delta$  7.26 (d,  $J = 7.8$  Hz, 2H), 7.10 (d,  $J = 7.8$  Hz, 2H), 5.46 (dtt,  $J = 10.2, 7.1, 1.5$  Hz, 1H), 5.37 (dtt,  $J = 10.6, 7.3, 1.5$  Hz, 1H), 2.89 (t,  $J = 7.5$  Hz, 2H), 2.35 (q,  $J = 9.9, 8.6$  Hz, 2H), 2.32 (s, 3H), 2.01 (pd,  $J = 7.4, 1.4$  Hz, 2H), 0.95 (t,  $J = 7.5$  Hz, 2H).  $^{13}\text{C NMR}$  (150 MHz,  $\text{CDCl}_3$ )  $\delta$  136.16, 133.65, 132.85, 130.15, 130.12, 129.77, 126.67, 34.47, 27.15, 21.15, 20.78, 14.39. **HRMS** calcd. for  $\text{C}_{13}\text{H}_{19}\text{S}^+$   $[\text{M}+\text{H}]^+$ : 207.1202, Found: 207.1215.

**(Z)-1-(hex-3-en-1-ylsulfinyl)-4-methylbenzene ((Z)-I-E):** To a 25-mL round-bottom flask equipped with a magnetic stir bar was charged (Z)-hex-3-en-1-yl(*p*-tolyl)sulfane (0.5 mmol, 1 equiv) and DCM (5 mL, 0.1 M). The mixture was cooled to 0 ° C. A solution of mCPBA (0.5 mmol, 1 equiv) in DCM (5 mL, 0.1 M) was then added dropwise. The reaction was stirred for 4 h. The organic materials were separated by addition of NaOH in  $\text{H}_2\text{O}$  (0.2 M, 25 mL), followed by extraction with EtOAc (3  $\times$  10 mL). The organic layer was dried over  $\text{Na}_2\text{SO}_4$ , and after filtration the solvent was removed *in vacuo*. The crude residue was purified by  $\text{SiO}_2$  gel column chromatography (40% EtOAc/hexanes). Purification afforded (Z)-I-E

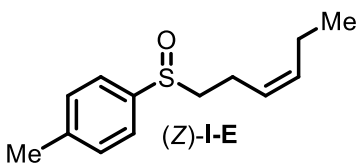

as a white solid (92 mg, 83%). **<sup>1</sup>H NMR** (600 MHz, CDCl<sub>3</sub>) δ 7.51 (d, *J* = 8.2 Hz, 2H), 7.32 (d, *J* = 7.9 Hz, 2H), 5.47 (dt, *J* = 10.5, 7.3, 1.5 Hz, 1H), 5.30 (dt, *J* = 10.7, 7.4, 1.6 Hz, 1H), 2.79 (qdd, *J* = 13.0, 9.1, 6.2 Hz, 2H), 2.49 (tt, *J* = 19.5, 9.7 Hz, 1H), 2.41 (s, 3H), 2.31 (dq, *J* = 14.8, 7.0 Hz, 1H), 2.00 (h, *J* = 7.0, 6.6 Hz, 2H), 0.94 (t, *J* = 7.5 Hz, 3H). **<sup>13</sup>C NMR** (150 MHz, CDCl<sub>3</sub>) δ 141.57, 140.64, 134.64, 130.03, 124.95, 124.23, 57.19, 21.54, 20.69, 20.33, 14.23. **HRMS** calcd. for C<sub>13</sub>H<sub>19</sub>OS<sup>+</sup> [M+H]<sup>+</sup>: 223.1151, Found: 223.1162.

**(Z)-1-(hex-3-en-1-ylsulfinyl)-4-methylbenzene ((Z)-I-F)**: The title compound was prepared on a

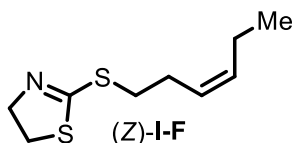

0.300 mmol scale according to General Procedure 1. The crude residue was purified by preparative TLC (5% Et<sub>2</sub>O/hexanes). Purification afforded (Z)-I-F as a clear liquid (39 mg, 64%). **<sup>1</sup>H NMR** (600 MHz, CDCl<sub>3</sub>) δ 5.51–5.44 (m, 1H), 5.34 (dt, *J* = 10.6, 7.4, 1.6 Hz, 1H), 4.21 (t, *J* = 7.9 Hz, 2H),

3.37 (t, *J* = 7.9 Hz, 2H), 3.11 (t, *J* = 7.4 Hz, 2H), 2.44 (qd, *J* = 7.4, 1.4 Hz, 2H), 2.05 (pd, *J* = 7.5, 1.6 Hz, 2H), 0.96 (t, *J* = 7.5 Hz, 3H). **<sup>13</sup>C NMR** (150 MHz, CDCl<sub>3</sub>) δ 165.70, 134.19, 126.12, 64.49, 35.51, 32.85, 27.11, 20.81, 14.36. **HRMS** calcd. for C<sub>9</sub>H<sub>16</sub>NS<sub>2</sub><sup>+</sup> [M+H]<sup>+</sup>: 202.0719, Found: 202.0723.

**(Z)-5-(hex-3-en-1-ylthio)-1-phenyl-1H-tetrazolemethylbenzene ((Z)-I-G)**: The title compound

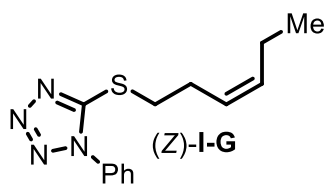

was prepared according to General Procedure 1. The crude residue was purified by SiO<sub>2</sub> gel column chromatography (10% Et<sub>2</sub>O/hexanes). Purification afforded (Z)-I-G as a clear liquid (110 mg, 41%). **<sup>1</sup>H NMR** (600 MHz, CDCl<sub>3</sub>) δ 7.65–7.46 (m, 5H), 5.51 (dt, *J* = 10.7, 7.1 Hz, 1H), 5.41–5.26 (m, 1H), 3.41 (t, *J* = 7.2 Hz, 2H), 2.58 (q, *J* = 7.3 Hz, 2H),

2.03 (p, *J* = 6.7, 6.3 Hz, 2H), 0.94 (t, *J* = 7.6 Hz, 3H). **<sup>13</sup>C NMR** (150 MHz, CDCl<sub>3</sub>) δ 154.27, 134.80, 133.66, 130.00, 129.69, 125.08, 123.77, 33.19, 26.67, 20.62, 14.07. **HRMS** calcd. for C<sub>13</sub>H<sub>17</sub>N<sub>4</sub>S<sup>+</sup> [M+H]<sup>+</sup>: 261.1169, Found: 261.1157.

**(Z)-2-(hex-3-en-1-ylthio)-1H-benzimidazole ((Z)-I-H)**: The title compound was prepared

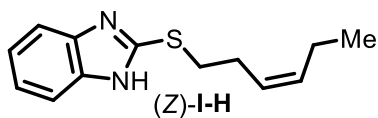

according to General Procedure 1. The crude residue was purified by preparative TLC (10% EtOAc/hexanes). Purification afforded (Z)-I-H as a white solid (33 mg, 47%). **<sup>1</sup>H NMR** (600 MHz, CDCl<sub>3</sub>) δ 9.98 (s, 1H), 7.51 (s, 2H), 7.20 (dd, *J* = 6.0, 3.1 Hz, 2H), 5.47 (dt,

*J* = 10.5, 7.3, 1.5 Hz, 1H), 5.36 (dt, *J* = 10.6, 7.3, 1.6 Hz, 1H), 3.36 (t, *J* = 7.3 Hz, 2H), 2.52 (q, *J* = 7.1 Hz, 2H), 2.02 (pd, *J* = 7.5, 1.5 Hz, 2H), 0.94 (t, *J* = 7.5 Hz, 3H). **<sup>13</sup>C NMR** (150 MHz, CDCl<sub>3</sub>) δ 150.60, 134.35, 125.99, 122.39, 32.82, 27.34, 20.82, 14.31. **HRMS** calcd. for C<sub>13</sub>H<sub>17</sub>N<sub>2</sub>S<sup>+</sup> [M+H]<sup>+</sup>: 233.1107, Found: 233.1115.

**(Z)-2-(hex-3-en-1-ylthio)benzoxazole ((Z)-I-I):** The title compound was prepared according to General Procedure 1 on a 0.500 mmol scale. The crude residue was purified by SiO<sub>2</sub> gel column chromatography (5% Et<sub>2</sub>O/hexanes). Purification afforded (Z)-I-I as a clear liquid (47 mg, 40%). <sup>1</sup>H NMR (600 MHz, CDCl<sub>3</sub>) δ 7.62 – 7.57 (m, 1H), 7.47 – 7.41 (m, 1H), 7.28 (td, *J* = 7.6, 1.2 Hz, 1H), 7.24 (td, *J* = 7.7, 1.3 Hz, 1H), 5.58 – 5.49 (m, 1H), 5.44 – 5.39 (m, 1H), 3.33 (t, *J* = 7.3 Hz, 2H), 2.71 – 2.48 (m, 2H), 2.08 (pd, *J* = 7.5, 1.5 Hz, 2H), 0.98 (t, *J* = 7.5 Hz, 3H). <sup>13</sup>C NMR (150 MHz, CDCl<sub>3</sub>) δ 165.21, 151.96, 142.17, 134.75, 125.63, 124.37, 123.92, 118.51, 109.97, 32.37, 27.15, 20.85, 14.32. HRMS calcd. for C<sub>13</sub>H<sub>15</sub>NOS<sup>+</sup> [M+H]<sup>+</sup>: 234.0953, Found: 234.0957.

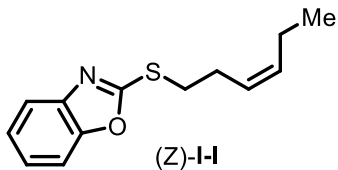

**(Z)-2-(hex-3-en-1-ylthio)benzothiophene ((Z)-I-J):** A flame dried 50-mL round-bottom flask equipped with a magnetic stir bar was charged with *p*-toluenesulfonyl chloride (10.00 mmol, 1 equiv) and sealed with a rubber septum. Chloroform (5 mL) and pyridine (1.3 mL) were added via syringe. The mixture was stirred for 5 min until the *p*-toluenesulfonyl chloride fully dissolved and the mixture turned yellow. (Z)-Hex-3-en-1-ol (10 mmol, 1 equiv) was dissolved in chloroform (4 mL), and the resulting solution was added dropwise to the reaction. The reaction was allowed to stir at room temperature for 12 h. Diethyl ether (10 mL) was added, and the mixture was washed sequentially with 1 N HCl (50 mL), saturated aqueous NaHCO<sub>3</sub> (50 mL), and brine (50 mL). The organic layer was dried over MgSO<sub>4</sub>. After filtration the solvent was removed *in vacuo*, and the crude residue was purified by SiO<sub>2</sub> gel column chromatography (10% EtOAc/hexanes) to give (*E*)-hex-3-en-1-yl 4-methylbenzenesulfonate, which was directly carried on to the next step.

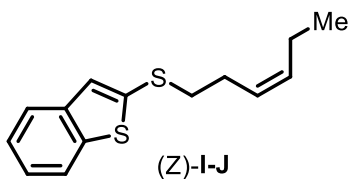

To a flame-dried, 25-mL round-bottom flask equipped with a magnetic stir bar were added NaH (60% oil dispersion, 2.0 mmol, 3 equiv) and DMF (10 mL, 0.2 M) under nitrogen. The mixture was cooled to 0 ° C. Benzothiophene-2-thiol (2.00 mmol, 1 equiv) was added followed by (Z)-hex-3-en-1-yl 4-methylbenzenesulfonate (2.45 mmol, 1.2 equiv) in DMF (5 mL). The reaction was allowed to warm to room temperature and stirred for 20 h. The reaction was cooled to 0 ° C and quenched with the addition of water and diethyl ether (5 mL, 1:1 mixture). The organic materials were separated by addition to H<sub>2</sub>O (25 mL), followed by extraction with EtOAc (3 × 10 mL). The organic layer was dried with Na<sub>2</sub>SO<sub>4</sub>. After filtration the solvent was removed *in vacuo*, and the crude residue was purified by SiO<sub>2</sub> gel column chromatography (10% EtOAc/hexanes). Purification afforded (Z)-I-J as a pink liquid (162 mg, 32%). <sup>1</sup>H NMR (600 MHz, CDCl<sub>3</sub>) δ 7.74 (d, *J* = 7.7 Hz, 1H), 7.68 (dd, *J* = 7.4, 1.5 Hz, 1H), 7.38 – 7.28 (m, 3H), 5.53 – 5.43 (m, 1H), 5.37 (dt, *J* = 10.5, 7.2, 1.6 Hz, 1H), 2.96 (t, *J* = 7.4 Hz, 2H), 2.42 (qd, *J* = 7.4, 1.4 Hz, 2H), 2.03 (pd, *J* = 7.4, 1.6 Hz, 2H), 0.96 (t, *J* = 7.5 Hz, 3H). <sup>13</sup>C NMR (150 MHz, CDCl<sub>3</sub>) δ 141.74, 139.95, 137.42, 134.10, 128.02, 126.12, 124.58, 124.42, 123.10, 121.98, 37.52, 27.45, 20.84, 14.37. HRMS calcd. for C<sub>14</sub>H<sub>17</sub>S<sub>2</sub><sup>+</sup> [M+H]<sup>+</sup>: 249.0772, Found: 249.0768.

**(Z)-2-(hex-3-en-1-ylthio)benzothiazole ((Z)-I-K):** The title compound was prepared according to

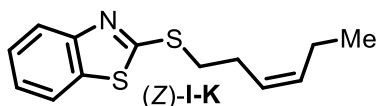

General Procedure 1. The crude residue was purified by SiO<sub>2</sub> gel column chromatography (5% Et<sub>2</sub>O/hexanes). Purification afforded (Z)-I-K as a clear liquid (250 mg, >95%). <sup>1</sup>H NMR (600 MHz, CDCl<sub>3</sub>) δ 7.88 (d, *J* = 8.1 Hz, 1H), 7.76 (d, *J* = 8.0 Hz, 1H), 7.41 (t, *J* = 7.6 Hz, 1H), 7.29 (t, *J* = 7.6 Hz, 1H), 5.57–5.48 (m, 1H), 5.46–5.38 (m, 1H), 3.36 (t, *J* = 7.4 Hz, 2H), 2.58 (q, *J* = 7.2 Hz, 2H), 2.09 (p, *J* = 7.2 Hz, 2H), 0.99 (t, *J* = 7.5 Hz, 3H). <sup>13</sup>C NMR (150 MHz, CDCl<sub>3</sub>) δ 167.14, 153.47, 135.34, 134.56, 126.11, 125.85, 124.24, 121.57, 121.05, 33.58, 27.17, 20.84, 14.37. HRMS calcd. for C<sub>13</sub>H<sub>16</sub>NS<sub>2</sub><sup>+</sup> [M+H]<sup>+</sup>: 250.0719, Found: 250.0724.

**(Z)-2-(hex-3-en-1-ylthio)thiazolo[5,4-b]pyridine ((Z)-I-L):** The title compound was prepared on

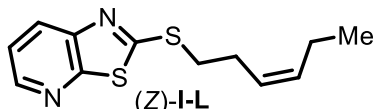

an 0.300 mmol scale according to General Procedure 1. The crude residue was purified by SiO<sub>2</sub> (10% EtOAc/hexanes). Purification afforded (Z)-I-L as a clear liquid (74 mg, >95%). <sup>1</sup>H NMR (600 MHz, CDCl<sub>3</sub>) δ 8.43 (dd, *J* = 4.7, 1.6 Hz, 1H), 8.04 (dd, *J* = 8.1, 1.6 Hz, 1H), 7.34 (dd, *J* = 8.2, 4.7 Hz, 1H), 5.60–5.49 (m, 1H), 5.41 (dtt, *J* = 10.7, 7.3, 1.6 Hz, 1H), 3.38 (t, *J* = 7.4 Hz, 2H), 2.58 (qd, *J* = 7.4, 1.4 Hz, 2H), 2.09 (pd, *J* = 7.5, 1.5 Hz, 2H), 0.99 (t, *J* = 7.5 Hz, 3H). <sup>13</sup>C NMR (150 MHz, CDCl<sub>3</sub>) δ 168.85, 158.90, 146.58, 145.69, 134.76, 127.93, 125.67, 121.24, 32.95, 27.08, 20.86, 14.37. HRMS calcd. for C<sub>12</sub>H<sub>15</sub>N<sub>2</sub>S<sub>2</sub><sup>+</sup> [M+H]<sup>+</sup>: 251.0671, Found: 251.0688.

**(Z)-5-chloro-2-(hex-3-en-1-ylthio)benzothiazole ((Z)-I-M):** The title compound was prepared on

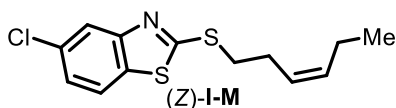

a 0.300 mmol scale according to General Procedure 1. The crude residue was purified by SiO<sub>2</sub> gel column chromatography (5% Et<sub>2</sub>O/hexanes). Purification afforded (Z)-I-M as a clear liquid (81 mg, >95%). <sup>1</sup>H NMR (600 MHz, CDCl<sub>3</sub>) δ 7.84 (d, *J* = 2.1 Hz, 1H), 7.65 (d, *J* = 8.5 Hz, 1H), 7.26 (dd, *J* = 8.5, 1.9 Hz, 1H), 5.57–5.48 (m, 1H), 5.41 (dtt, *J* = 10.6, 7.3, 1.6 Hz, 1H), 3.36 (t, *J* = 7.4 Hz, 2H), 2.58 (qd, *J* = 7.3, 1.4 Hz, 2H), 2.08 (pd, *J* = 7.5, 1.5 Hz, 2H), 0.99 (t, *J* = 7.5 Hz, 3H). <sup>13</sup>C NMR (150 MHz, CDCl<sub>3</sub>) δ 169.45, 154.30, 134.71, 133.59, 132.21, 125.72, 124.60, 121.67, 121.48, 33.62, 27.11, 20.86, 14.38. HRMS calcd. for C<sub>13</sub>H<sub>15</sub>ClNS<sub>2</sub><sup>+</sup> [M+H]<sup>+</sup>: 284.0329, Found: 284.0333.

**(Z)-6-ethoxy-2-(hex-3-en-1-ylthio)benzothiazole ((Z)-I-N):** The reaction was carried out

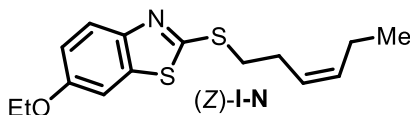

according to General Procedure 1 on a 0.300 mmol scale. The crude residue was purified by SiO<sub>2</sub> gel column chromatography (5% Et<sub>2</sub>O/hexanes). Purification afforded (Z)-I-N as a clear liquid (86 mg, >95%). <sup>1</sup>H NMR (600 MHz, CDCl<sub>3</sub>) δ 7.74 (d, *J* = 8.9 Hz, 1H), 7.22 (d, *J* = 2.5 Hz, 1H), 7.00 (dd, *J* = 8.9, 2.5 Hz, 1H), 5.51 (dtt, *J* = 10.2, 7.2, 1.5 Hz, 1H), 5.45–5.34 (m, 1H), 4.07 (q, *J* = 7.0 Hz, 2H), 3.32 (t, *J* = 7.4 Hz, 2H), 2.56 (q, *J* = 6.8, 6.2 Hz, 2H), 2.08 (pd, *J* = 7.5, 1.5 Hz, 2H), 1.44 (t, *J* = 7.0 Hz, 3H), 0.98 (t, *J* = 7.5 Hz, 3H). <sup>13</sup>C NMR (150 MHz, CDCl<sub>3</sub>) δ 163.73, 156.47, 147.99, 136.68, 134.50, 125.93, 122.06, 115.35, 104.98, 27.25, 20.85, 14.99, 14.38. HRMS calcd. for C<sub>15</sub>H<sub>20</sub>NOS<sub>2</sub><sup>+</sup> [M+H]<sup>+</sup>: 294.0981, Found: 294.0987.

**(Z)-2-(hex-3-en-1-ylthio)-5-(trifluoromethoxy)benzothiazole ((Z)-I-O):** The title compound was

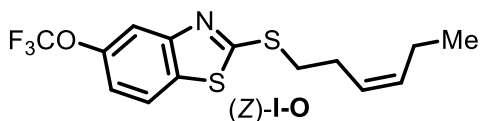

prepared on an 0.300 mmol scale according to General Procedure 1. The crude residue was purified by SiO<sub>2</sub> gel column chromatography (5% Et<sub>2</sub>O/hexanes). Purification afforded (Z)-I-O as a clear liquid (100 mg, >95%). <sup>1</sup>H NMR

(600 MHz, CDCl<sub>3</sub>) δ 7.80–7.66 (m, 2H), 7.18 (dd, *J* = 8.7, 2.3 Hz, 1H), 5.54 (dt, *J* = 10.5, 7.3, 1.5 Hz, 1H), 5.41 (dt, *J* = 10.6, 7.3, 1.6 Hz, 1H), 3.37 (t, *J* = 7.4 Hz, 2H), 2.58 (qd, *J* = 7.4, 1.4 Hz, 2H), 2.09 (pd, *J* = 7.5, 1.5 Hz, 2H), 0.99 (t, *J* = 7.5 Hz, 3H). <sup>13</sup>C NMR (150 MHz, CDCl<sub>3</sub>) δ 170.29, 154.08, 147.97, 134.75, 133.65, 125.68, 123.26, 121.64, 121.55, 119.85, 118.14, 117.69, 114.09, 33.64, 27.08, 20.86, 14.36. <sup>19</sup>F NMR (376 MHz, CDCl<sub>3</sub>) δ -58.99. HRMS calcd. for C<sub>14</sub>H<sub>15</sub>F<sub>3</sub>NOS<sub>2</sub><sup>+</sup> [M+H]<sup>+</sup>: 334.0542, Found: 334.0550.

**(Z)-2-(hex-3-en-1-ylsulfinyl)benzothiazole ((Z)-I-P):** To a 25-mL round-bottom flask equipped

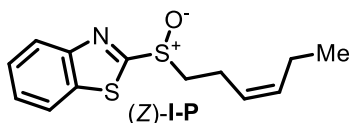

with a magnetic stir bar was charged (*E*)-2-(hex-3-en-1-ylsulfinyl)benzothiazole (0.5 mmol, 1 equiv) and DCM (5 mL, 0.1 M). The mixture was cooled to 0 °C. A solution of mCPBA (0.5 mmol, 1 equiv) in DCM (5 mL, 0.1 M) was then added dropwise. The reaction

was stirred for 4 h. The organic materials were separated by addition of H<sub>2</sub>O (0.2 M, 25 mL), followed by extraction with EtOAc (3 × 10 mL). The organic layer was dried over Na<sub>2</sub>SO<sub>4</sub>, and after filtration the solvent was removed *in vacuo*. The mixture was purified by SiO<sub>2</sub> gel column chromatography (40% EtOAc/hexanes). Purification afforded (Z)-I-P as a white solid (105 mg, 79%). <sup>1</sup>H NMR (600 MHz, CDCl<sub>3</sub>) δ 8.06 (d, *J* = 8.2 Hz, 1H), 8.00 (d, *J* = 8.1 Hz, 1H), 7.56 (t, *J* = 7.4 Hz, 1H), 7.49 (t, *J* = 7.6 Hz, 1H), 5.51 (dt, *J* = 10.5, 7.3, 1.5 Hz, 1H), 5.38–5.31 (m, 1H), 3.24 (dddd, *J* = 35.7, 13.3, 9.1, 6.2 Hz, 2H), 2.73 (dq, *J* = 14.9, 7.9, 7.2 Hz, 1H), 2.50–2.40 (m, 1H), 2.04 (h, *J* = 7.5 Hz, 2H), 0.95 (t, *J* = 7.5 Hz, 3H). <sup>13</sup>C NMR (150 MHz, CDCl<sub>3</sub>) δ 177.80, 154.07, 136.13, 135.40, 127.06, 126.28, 124.15, 124.04, 122.42, 56.54, 20.73, 19.80, 14.19. HRMS calcd. for C<sub>13</sub>H<sub>16</sub>NOS<sub>2</sub><sup>+</sup> [M+H]<sup>+</sup>: 266.0668, Found: 266.0682.

**(Z)-2-(hex-3-en-1-ylsulfonyl)benzothiazole ((Z)-I-Q):** To a 100-mL round-bottom flask equipped

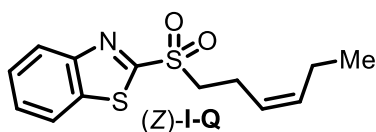

with a magnetic stir bar were added (*E*)-2-(hex-3-en-1-ylthio)benzothiazole (0.300 mmol, 1 equiv), 30% aqueous H<sub>2</sub>O<sub>2</sub> (0.6 mL, 6 equiv), ammonium heptamolybdate tetrahydrate (0.006 mmol, 1 mol%), and ethanol (5.0 mL, 0.06 M). The reaction was

stirred at room temperature for 12 h. The organic materials were separated by addition of H<sub>2</sub>O (20 mL), followed by extraction with EtOAc (3 × 10 mL). The organic solution was washed with brine (10 mL) and dried over Na<sub>2</sub>SO<sub>4</sub>. After filtration, the solvent was removed *in vacuo* to afford (Z)-I-Q as a white solid (82 mg, >95%). <sup>1</sup>H NMR (600 MHz, CDCl<sub>3</sub>) δ 8.22 (d, *J* = 8.1 Hz, 1H), 8.02 (d, *J* = 8.0 Hz, 1H), 7.62 (dt, *J* = 27.1, 7.2 Hz, 2H), 5.51–5.41 (m, 1H), 5.26 (dddd, *J* = 14.4, 7.4, 5.2, 3.6 Hz, 1H), 3.57–3.50 (m, 2H), 2.63 (q, *J* = 7.4 Hz, 2H), 2.02 (p, *J* = 7.1 Hz, 2H), 0.94 (t, *J* = 7.5 Hz, 3H). <sup>13</sup>C NMR (150 MHz, CDCl<sub>3</sub>) δ 165.97, 152.84, 136.89, 135.49, 128.17, 127.81, 125.58,

123.22, 122.48, 54.56, 20.68, 20.58, 14.14. **HRMS** calcd. for  $C_{13}H_{16}NO_2S_2^+$   $[M+H]^+$ : 282.0617, Found: 282.0624.

**5-(but-3-en-1-ylthio)-1-phenyl-1H-tetrazole (VI-A):** The title compound was prepared according

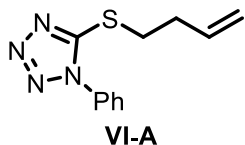

to General Procedure 1. The crude residue was purified by  $SiO_2$  gel column chromatography (10%  $Et_2O$ /hexanes). Purification afforded **VI-A** as a yellow solid (232.3 mg, 35%).  **$^1H$  NMR** (600 MHz,  $CDCl_3$ )  $\delta$  7.66–7.51 (m, 5H), 5.82 (ddt,  $J = 16.9, 10.2, 6.7$  Hz, 1H), 5.12 (dd,  $J = 17.1, 1.7$  Hz, 1H), 5.09 (d,  $J =$

9.0 Hz, 1H), 3.46 (t,  $J = 7.2$  Hz, 2H), 2.59 (q,  $J = 7.1$  Hz, 2H).  **$^{13}C$  NMR** (150 MHz,  $CDCl_3$ )  $\delta$  154.36, 135.23, 133.81, 130.23, 129.91, 123.97, 117.53, 33.25, 32.69. **HRMS** calcd. for  $C_{11}H_{13}N_4S^+$   $[M+H]^+$ : 233.0856, Found: 233.0863.

**2-(but-3-en-1-ylthio)-4,5-dihydrothiazole (VI-B):** The title compound was prepared according to

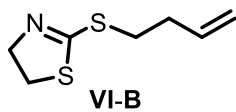

General Procedure 1. The crude residue was purified by  $SiO_2$  gel column chromatography (10%  $Et_2O$ /hexanes). Purification afforded **IV-B** as a clear liquid (173 mg, 43%).  **$^1H$  NMR** (600 MHz,  $CDCl_3$ )  $\delta$  5.81 (ddt,  $J = 17.0, 10.3,$

6.6 Hz, 1H), 5.10 (d,  $J = 18.9$  Hz, 1H), 5.05 (d,  $J = 12.2$  Hz, 0H), 4.21 (t,  $J = 8.0$  Hz, 2H), 3.37 (t,  $J = 8.0$  Hz, 2H), 3.16 (t,  $J = 7.3$  Hz, 2H), 2.45 (q,  $J = 7.1$  Hz, 2H).  **$^{13}C$  NMR** (150 MHz,  $CDCl_3$ )  $\delta$  136.05, 116.70, 64.45, 35.52, 33.52, 32.06. **HRMS** calcd. for  $C_7H_{12}NS_2^+$   $[M+H]^+$ : 174.0406, Found: 174.0408.

**2-(but-3-en-1-ylthio)thiazolo[5,4-b]pyridine (VI-C):** The title compound was prepared according

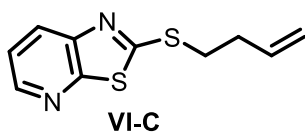

to General Procedure 1. The crude residue was purified by  $SiO_2$  gel column chromatography (10%  $Et_2O$ /hexanes). Purification afforded **VI-C** as a clear liquid (171 mg, 77%).  **$^1H$  NMR** (600 MHz,  $CDCl_3$ )  $\delta$  8.52–8.36 (m, 1H), 8.04 (dd,  $J = 8.2, 1.6$  Hz, 1H), 7.38–7.30 (m, 1H), 5.88 (ddt,  $J =$

17.0, 10.6, 6.7 Hz, 1H), 5.16 (d,  $J = 17.7$  Hz, 1H), 5.11 (d,  $J = 10.2$  Hz, 1H), 3.43 (t,  $J = 7.3$  Hz, 2H), 2.59 (q,  $J = 7.2$  Hz, 2H).  **$^{13}C$  NMR** (150 MHz,  $CDCl_3$ )  $\delta$  168.52, 158.79, 146.45, 145.63, 135.57, 127.88, 121.15, 117.19, 33.30, 32.11. **HRMS** calcd. for  $C_{10}H_{11}N_2S_2^+$   $[M+H]^+$ : 223.0358, Found: 223.0364.

**2-(but-3-en-1-ylthio)-5-chlorobenzothiazole (VI-D):** The title compound was prepared according

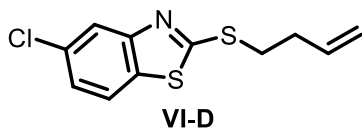

to General Procedure 1. The crude residue was purified by  $SiO_2$  gel column chromatography (5%  $Et_2O$ /hexanes). Purification afforded **VI-D** as a clear liquid (255 mg, >95%).  **$^1H$  NMR** (600 MHz,  $CDCl_3$ )  $\delta$  7.84 (d,  $J = 2.1$  Hz, 1H), 7.63 (dd,  $J = 8.5, 1.4$  Hz, 1H), 7.28–7.21 (m, 1H), 5.88 (ddt,  $J = 16.9, 10.3, 6.7$  Hz, 1H), 5.16 (dd,  $J = 17.2, 1.7$  Hz, 1H), 5.11 (dd,  $J = 10.2,$

1.6 Hz, 1H), 3.41 (t,  $J = 7.3$  Hz, 2H), 2.58 (q,  $J = 7.1$  Hz, 2H).  **$^{13}C$  NMR** (150 MHz,  $CDCl_3$ )  $\delta$  169.21, 154.21, 135.67, 133.54, 132.18, 124.59, 121.63, 121.47, 117.18, 33.39, 32.86. **HRMS** calcd. for  $C_{11}H_{11}ClNS_2^+$   $[M+H]^+$ : 256.0016, Found: 256.0025.



**2-(but-3-en-1-ylthio)-6-ethoxybenzothiazole (VI-E):** The title compound was prepared according

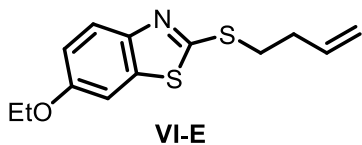

to General Procedure 1. The crude residue was purified by SiO<sub>2</sub> gel column chromatography (5% Et<sub>2</sub>O/hexanes). Purification afforded **VI-E** as a clear liquid (264 mg, >95%). <sup>1</sup>H NMR (600 MHz, CDCl<sub>3</sub>)

δ 7.74 (d, *J* = 8.9 Hz, 1H), 7.21 (d, *J* = 2.6 Hz, 1H), 7.00 (dd, *J* = 8.9, 2.6 Hz, 1H), 5.88 (ddt, *J* = 16.9, 10.3, 6.6 Hz, 1H), 5.15 (dd, *J* = 17.1, 1.7 Hz, 1H), 5.09 (dd, *J* = 10.2, 1.6 Hz, 1H), 4.06 (q, *J* = 7.0 Hz, 2H), 3.37 (t, *J* = 7.4 Hz, 2H), 2.57 (q, *J* = 7.1 Hz, 2H), 1.43 (t, *J* = 7.0 Hz, 3H). <sup>13</sup>C NMR (150 MHz, CDCl<sub>3</sub>) δ 163.47, 156.45, 147.90, 136.63, 135.85, 122.05, 116.96, 115.32, 104.90, 64.19, 33.52, 33.02, 14.94. HRMS calcd. for C<sub>13</sub>H<sub>16</sub>NOS<sub>2</sub><sup>+</sup> [M+H]<sup>+</sup>: 266.0668, Found: 266.0679.

**2-(but-3-en-1-ylthio)benzothiazole (1):** The title compound was prepared on 18 mmol scale

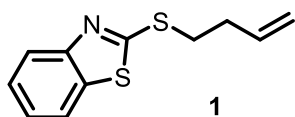

according to General Procedure 1. The crude residue was purified by SiO<sub>2</sub> gel column chromatography (10% Et<sub>2</sub>O/hexanes). Purification afforded **1** as a clear liquid (3.98 g, >95%). <sup>1</sup>H NMR (600 MHz, CDCl<sub>3</sub>) δ 7.87 (d, *J*

= 8.1 Hz, 1H), 7.75 (d, *J* = 8.0 Hz, 1H), 7.44–7.40 (m, 1H), 7.32–7.28 (m, 1H), 5.89 (ddt, *J* = 16.9, 10.2, 6.7 Hz, 1H), 5.16 (dd, *J* = 17.1, 1.6 Hz, 1H), 5.11 (dd, *J* = 10.2, 1.5 Hz, 1H), 3.43 (t, *J* = 7.3 Hz, 2H), 2.60 (q, *J* = 7.2 Hz, 2H). <sup>13</sup>C NMR (150 MHz, CDCl<sub>3</sub>) δ 166.91, 153.41, 135.80, 135.31, 126.10, 124.26, 121.59, 121.03, 117.05, 33.45, 32.84. HRMS calcd. for C<sub>11</sub>H<sub>12</sub>NS<sub>2</sub><sup>+</sup> [M+H]<sup>+</sup>: 222.0406, Found: 222.0411.

**2-(pent-4-en-2-ylthio)benzothiazole (3a):** The title compound was prepared according to General

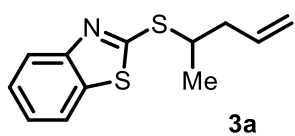

Procedure 1. The crude residue was purified by SiO<sub>2</sub> gel column chromatography (5% Et<sub>2</sub>O/hexanes). Purification afforded **3a** as a yellow liquid (233 mg, >95%). <sup>1</sup>H NMR (600 MHz, CDCl<sub>3</sub>) δ 7.88 (dd, *J* = 8.2,

1.2 Hz, 1H), 7.76 (dd, *J* = 8.0, 1.2 Hz, 1H), 7.41 (ddd, *J* = 8.3, 7.2, 1.3 Hz, 1H), 7.30 (td, *J* = 7.7, 1.2 Hz, 1H), 5.88 (ddt, *J* = 17.2, 10.2, 7.1 Hz, 1H), 5.18–5.10 (m, 2H), 4.07 (td, *J* = 7.1, 6.0 Hz, 1H), 2.61 (dddt, *J* = 12.7, 7.1, 5.8, 1.3 Hz, 1H), 2.48 (dt, *J* = 14.4, 7.3, 1.3 Hz, 1H), 1.50 (d, *J* = 6.9 Hz, 3H). <sup>13</sup>C NMR (150 MHz, CDCl<sub>3</sub>) δ 166.36, 153.54, 135.46, 134.63, 126.11, 124.39, 121.76, 121.06, 118.15, 43.68, 41.02, 20.77. HRMS calcd. for C<sub>12</sub>H<sub>14</sub>NS<sub>2</sub><sup>+</sup> [M+H]<sup>+</sup>: 236.0562, Found: 236.0551.

**2-((2-methylbut-3-en-1-yl)thio)benzothiazole (3b):** The title compound was prepared according

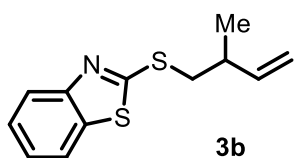

to General Procedure 1. The crude residue was purified by SiO<sub>2</sub> gel column chromatography (5% Et<sub>2</sub>O/hexanes). Purification afforded **3b** as a yellow liquid (231 mg, >95%). <sup>1</sup>H NMR (600 MHz, CDCl<sub>3</sub>) δ 7.86 (d, *J* = 7.9 Hz,

1H), 7.75 (d, *J* = 7.7 Hz, 1H), 7.41 (t, *J* = 7.5 Hz, 1H), 7.29 (t, *J* = 7.6 Hz, 1H), 5.83 (ddd, *J* = 17.2, 10.3, 6.9 Hz, 1H), 5.13 (d, *J* = 17.6 Hz, 1H), 5.07 (d, *J* = 10.2 Hz, 1H), 3.37 (qd, *J* = 12.8, 6.9 Hz, 2H), 2.68 (h, *J* = 6.9, 6.3 Hz, 1H), 1.20 (d, *J* = 6.6 Hz, 2H). <sup>13</sup>C NMR (150 MHz, CDCl<sub>3</sub>) δ 167.39, 153.43, 141.62, 135.33, 126.13, 124.27, 121.59,

121.06, 114.99, 39.84, 37.69, 19.49. **HRMS** calcd. for  $C_{12}H_{14}NS_2^+$   $[M+H]^+$ : 236.0562, Found: 236.0552.

**1-(benzothiazol-2-ylthio)but-3-en-2-ol (3c)**: The title compound was prepared according to

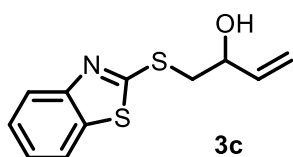

General Procedure 2. The crude residue was purified by  $SiO_2$  gel column chromatography (20% EtOAc/hexanes). Purification afforded **3c** as a white solid (159 mg, 67%).  **$^1H$  NMR** (600 MHz,  $CDCl_3$ )  $\delta$  7.86 (d,  $J$  = 8.1 Hz, 1H), 7.75 (d,  $J$  = 8.1, 1.2 Hz, 1H), 7.42 (ddd,  $J$  = 8.3, 7.2, 1.2 Hz, 1H), 7.34–7.28 (m, 1H), 5.98 (ddd,  $J$  = 17.2, 10.4, 5.5 Hz, 1H), 5.47–5.38 (m, 1H), 5.24 (dt,  $J$  = 10.4, 1.4 Hz, 1H), 4.63–4.58 (m, 2H), 3.59 (dd,  $J$  = 14.4, 3.2 Hz, 1H), 3.42 (dd,  $J$  = 14.4, 7.3 Hz, 1H).  **$^{13}C$  NMR** (150 MHz,  $CDCl_3$ )  $\delta$  167.85, 152.52, 138.87, 135.61, 126.41, 124.78, 121.49, 121.21, 116.32, 72.39, 40.73. **HRMS** calcd. for  $C_{11}H_{12}NOS_2^+$   $[M+H]^+$ : 238.0355, Found: 238.0337.

**2-((3-methylbut-3-en-1-yl)thio)benzothiazole (3d)**: The title compound was prepared according

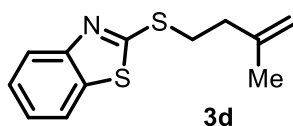

to General Procedure 1. The crude residue was purified by  $SiO_2$  gel column chromatography (5% Et<sub>2</sub>O/hexanes). Purification afforded **3d** as a yellow liquid (232 mg, >95%).  **$^1H$  NMR** (600 MHz,  $CDCl_3$ )  $\delta$  7.87 (d,  $J$  = 8.4 Hz, 1H), 7.75 (d,  $J$  = 1.1 Hz, 1H), 7.45–7.39 (m, 1H), 7.31–7.27 (m, 1H), 4.84 (d,  $J$  = 21.5 Hz, 2H), 3.48 (t,  $J$  = 7.6 Hz, 2H), 2.54 (t,  $J$  = 7.5 Hz, 2H), 1.81 (s, 3H).  **$^{13}C$  NMR** (150 MHz,  $CDCl_3$ )  $\delta$  167.08, 153.46, 143.25, 135.34, 126.13, 124.29, 121.62, 121.07, 112.24, 37.30, 31.81, 22.36. **HRMS** calcd. for  $C_{12}H_{14}NS_2^+$   $[M+H]^+$ : 236.0562, Found: 236.0569.

**2-(1S,2S,5R)-5-methyl-2-(prop-1-en-2-yl)cyclohexylthio)benzothiazole (3e)**: The title

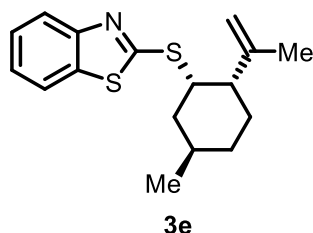

compound was prepared according to General Procedure 1. The crude residue was purified by  $SiO_2$  gel column chromatography (10% Et<sub>2</sub>O/hexanes). Purification afforded **3e** as a yellow liquid (247 mg, 81%).  **$^1H$  NMR** (600 MHz, Benzene-*d*<sub>6</sub>)  $\delta$  7.90 (d,  $J$  = 8.1 Hz, 1H), 7.21 (d,  $J$  = 8.0 Hz, 1H), 7.07 (t,  $J$  = 7.7 Hz, 1H), 6.89 (t,  $J$  = 7.5 Hz, 1H), 5.01 (d,  $J$  = 3.8 Hz, 1H), 4.85 (d,  $J$  = 44.4 Hz, 2H), 2.39 (dt,  $J$  = 13.9, 2.8 Hz, 1H), 2.03 (d,  $J$  = 12.2 Hz, 1H), 1.85–1.79 (m, 1H), 1.77 (s, 3H), 1.58 (d,  $J$  = 11.1 Hz, 2H), 1.47 (qd,  $J$  = 13.5, 12.9, 3.6 Hz, 1H), 1.29 (ddd,  $J$  = 14.5, 12.1, 3.3 Hz, 1H), 0.81–0.69 (m, 4H).  **$^{13}C$  NMR** (150 MHz,  $CDCl_3$ )  $\delta$  166.89, 152.83, 145.91, 134.77, 125.39, 123.56, 120.89, 120.40, 110.60, 48.95, 46.53, 40.48, 34.30, 27.31, 26.04, 21.93, 21.57. **HRMS** calcd. for  $C_{17}H_{22}NS_2^+$   $[M+H]^+$ : 304.1188, Found: 304.1206.

**(Z)-2-(hept-3-en-1-ylthio)benzothiazole (3h)**: The title compound was prepared according to

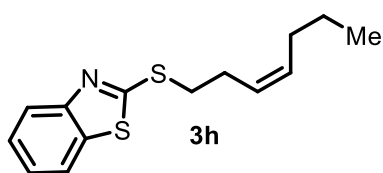

General Procedure 1. The crude residue was purified by  $SiO_2$  gel column chromatography (5% Et<sub>2</sub>O/hexanes). Purification afforded **3h** as a clear liquid (261 mg, >95%).  **$^1H$  NMR** (600 MHz,  $CDCl_3$ )  $\delta$  7.86 (dt,  $J$  = 8.1, 0.9 Hz, 1H), 7.75 (dt,  $J$  = 7.8, 0.9 Hz, 1H), 7.41 (ddd,  $J$  = 8.3, 7.2, 1.3 Hz, 1H), 7.29 (ddd,  $J$  = 8.2, 7.2, 1.2 Hz, 1H),

5.53 (dtt,  $J = 12.0, 7.1, 1.3$  Hz, 1H), 5.49–5.42 (m, 1H), 3.36 (t,  $J = 7.4$  Hz, 2H), 2.59 (qd,  $J = 7.3, 1.3$  Hz, 2H), 2.06 (qd,  $J = 7.4, 1.4$  Hz, 2H), 1.40 (h,  $J = 7.4$  Hz, 2H), 0.91 (t,  $J = 7.4$  Hz, 3H).  $^{13}\text{C}$  NMR (150 MHz,  $\text{CDCl}_3$ )  $\delta$  167.17, 153.48, 135.35, 132.76, 126.61, 126.13, 124.26, 121.59, 121.06, 33.58, 29.58, 27.30, 22.88, 13.94. HRMS calcd. for  $\text{C}_{14}\text{H}_{18}\text{NS}_2^+$   $[\text{M}+\text{H}]^+$ : 264.0875, Found: 264.0877.

**(Z)-2-(oct-3-en-1-ylthio)benzothiazole (3i):** The title compound was prepared according to General Procedure 1. The crude residue was purified by  $\text{SiO}_2$  gel column chromatography (5%  $\text{Et}_2\text{O}$ /hexanes). Purification afforded **3i** as a clear liquid (275 mg, >95%).  $^1\text{H}$  NMR (600 MHz,  $\text{CDCl}_3$ )  $\delta$  7.86 (d,  $J = 8.1$  Hz, 1H), 7.76 (dd,  $J = 8.0, 1.2$  Hz, 1H), 7.41 (ddd,  $J = 8.3, 7.2, 1.3$  Hz, 1H), 7.31–7.27 (m, 1H), 5.58–5.49 (m, 1H), 5.49–5.42 (m, 1H), 3.36 (t,  $J = 7.4$  Hz, 2H), 2.59 (q,  $J = 7.0$  Hz, 2H), 2.05 (qd,  $J = 7.3, 1.4$  Hz, 2H), 1.40 (h,  $J = 7.4$  Hz, 2H), 0.90 (t,  $J = 7.4$  Hz, 3H), 0.89–0.71 (m, 2H).  $^{13}\text{C}$  NMR (150 MHz,  $\text{CDCl}_3$ )  $\delta$  167.18, 153.49, 135.35, 132.99, 126.41, 126.13, 124.27, 121.59, 121.06, 33.59, 31.92, 27.27, 22.50, 14.13. HRMS calcd. for  $\text{C}_{15}\text{H}_{20}\text{NS}_2^+$   $[\text{M}+\text{H}]^+$ : 278.1032, Found: 278.1045.

**(Z)-2-(non-3-en-1-ylthio)benzothiazole (3j):** The title compound was prepared according to General Procedure 1. The crude residue was purified by  $\text{SiO}_2$  gel column chromatography (5%  $\text{Et}_2\text{O}$ /hexanes). Purification afforded **3j** as a clear liquid (290 mg, >95%).  $^1\text{H}$  NMR (600 MHz,  $\text{CDCl}_3$ )  $\delta$  7.89 (dd,  $J = 8.1, 1.1$  Hz, 1H), 7.78 (dd,  $J = 8.0, 1.1$  Hz, 1H), 7.43 (ddd,  $J = 8.3, 7.2, 1.3$  Hz, 1H), 7.36–7.30 (m, 1H), 5.59–5.51 (m, 1H), 5.51–5.42 (m, 1H), 3.39 (t,  $J = 7.4$  Hz, 2H), 2.61 (qd,  $J = 7.3, 1.3$  Hz, 2H), 2.12–2.05 (m, 2H), 1.39 (p,  $J = 7.3$  Hz, 2H), 1.30 (tdd,  $J = 9.5, 7.3, 5.6$  Hz, 4H), 0.90 (t,  $J = 6.9$  Hz, 3H).  $^{13}\text{C}$  NMR (150 MHz,  $\text{CDCl}_3$ )  $\delta$  167.16, 153.49, 135.34, 133.05, 126.38, 126.12, 124.26, 121.59, 121.05, 33.59, 31.65, 29.42, 27.52, 27.26, 22.69, 14.20. HRMS calcd. for  $\text{C}_{16}\text{H}_{22}\text{NS}_2^+$   $[\text{M}+\text{H}]^+$ : 292.1188, Found: 292.1211.

**(Z)-7-(benzothiazol-2-ylthio)hept-4-en-1-yl benzoate (3k):** The initial cross coupling was performed following a literature procedure.<sup>5</sup> To a 20-mL flame-dried vial with a magnetic stir bar in a glovebox under nitrogen atmosphere were added 2-(but-3-en-1-ylthio)benzothiazole (**1**) (1.0 mmol, 1 equiv) and pent-4-en-1-ol (2.0 mmol, 2 equiv). To this mixture was added Grubbs Z-selective catalyst (Grubbs C675) dissolved in THF (2.5 mol%, 2.5 mL, 0.01 M). The solution was allowed to stir in an uncapped vial in the glovebox under nitrogen atmosphere for 24 h. The crude reaction mixture was filtered through a pad of Celite and the solvent was removed *in vacuo*. MeCN (1 mL) was added to the crude mixture, and the crude residue was purified by mass-directed prep LC. The crude material was purified on a Waters Autopurification LC with a Waters BEH C18 column (19×160 mm, 5 mm) using a 0.1% aqueous formic acid:acetonitrile gradient (30 mL/min,

main segment of gradient at 45–65% acetonitrile over 8 min) at ambient temperature. Fractionation was triggered by a Waters QDa single quadrupole mass spec in ESI+ ( $m/z = 280.1$  [M+H], cone voltage 15V). Purification afforded (Z)-7-(benzothiazol-2-ylthio)hept-4-en-1-ol as a yellow solid (84 mg, 30%), which was directly brought on to the next step.

A 4-mL vial equipped with a magnetic stir bar was charged with benzoyl chloride (0.150 mmol, 1.5 equiv), (Z)-7-(benzothiazol-2-ylthio)hept-4-en-1-ol (0.100 mmol, 1 equiv), pyridine (0.042 mL, 5 equiv), and *N,N*-dimethylaminopyridine (1.3 mg, 0.1 equiv). The reagents were dissolved in DCM (1 mL, 0.1 M) at 0 ° C and allowed to stir for 1 h. Water (1 mL) was added to the solution, and the solution was allowed to warm to room temperature. The organic materials were separated by addition of H<sub>2</sub>O (25 mL), followed by extraction with EtOAc (3 × 10 mL). The organic layer was dried over Na<sub>2</sub>SO<sub>4</sub>, and, after filtration, the solvent was removed *in vacuo*, and the crude residue was purified by SiO<sub>2</sub> gel column chromatography (10% Et<sub>2</sub>O/hexanes). Purification afforded **3k** as a clear liquid (32 mg, 80%). <sup>1</sup>H NMR (600 MHz, CDCl<sub>3</sub>) δ 8.06–7.95 (m, 2H), 7.84 (d, *J* = 8.1 Hz, 1H), 7.73 (d, *J* = 8.0 Hz, 1H), 7.53 (t, *J* = 7.5 Hz, 1H), 7.43–7.34 (m, 3H), 7.30–7.27 (m, 1H), 5.55 (tq, *J* = 11.1, 5.6, 4.3 Hz, 2H), 4.32 (t, *J* = 6.5 Hz, 2H), 3.36 (t, *J* = 7.4 Hz, 2H), 2.61 (q, *J* = 7.1 Hz, 2H), 2.26 (q, *J* = 7.1 Hz, 2H), 1.86 (p, *J* = 6.9 Hz, 2H). <sup>13</sup>C NMR (150 MHz, CDCl<sub>3</sub>) δ 166.98, 166.74, 153.43, 135.32, 132.98, 131.26, 130.48, 129.65, 128.46, 127.79, 126.16, 124.30, 121.59, 121.08, 64.46, 33.38, 28.72, 27.33, 24.04. HRMS calcd. for C<sub>21</sub>H<sub>22</sub>NO<sub>2</sub>S<sub>2</sub><sup>+</sup> [M+H]<sup>+</sup>: 384.1087, Found: 384.1099.

**(Z)-2-(6-(benzothiazol-2-ylthio)hex-3-en-1-yl)isoindoline-1,3-dione (3l)**: The title compound was

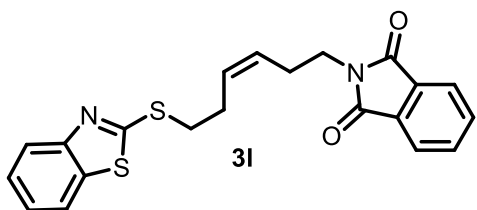

prepared following a literature procedure.<sup>5</sup> To a 20-mL flame-dried vial with a magnetic stir bar in a glovebox under nitrogen atmosphere were added 2-(but-3-en-1-ylthio)benzothiazole (**1**) (4.0 mmol, 1 equiv) and 2-(but-3-en-1-yl)isoindoline-1,3-dione (6.0 mmol, 1.5 equiv). To this mixture was added Grubbs *Z*-selective catalyst (Grubbs

C675) dissolved in THF (3.0 mol%, 12 mL, 0.01 M). The solution was allowed to stir in an uncapped vial in the glovebox under nitrogen atmosphere for 24 h. The crude reaction mixture was filtered through a pad of Celite and the solvent was removed *in vacuo*. MeCN (1 mL) was added to the crude mixture, and the crude residue was purified by mass-directed prep LC. The crude material was purified on a Waters Autopurification LC with a Waters BEH C18 column (19×160 mm, 5 mm) using a 0.1% aqueous formic acid:acetonitrile gradient (30 mL/min, main segment of gradient at 65–95% acetonitrile over 8 min) at ambient temperature. Fractionation was triggered by a Waters QDa single quadrupole mass spec in ESI+ ( $m/z = 395.1$  [M+H], cone voltage 15V). Purification afforded **3l** as a clear liquid (47 mg, 3%). <sup>1</sup>H NMR (600 MHz, CDCl<sub>3</sub>) δ 7.86–7.78 (m, 3H), 7.74 (d, *J* = 7.9 Hz, 1H), 7.66 (dd, *J* = 5.5, 3.0 Hz, 2H), 7.37 (t, *J* = 7.7 Hz, 1H), 7.27 (d, *J* = 7.9 Hz, 1H), 5.55 (dtd, *J* = 14.7, 11.1, 5.5 Hz, 2H), 3.76 (t, *J* = 7.1 Hz, 2H), 3.29 (t, *J* = 7.3 Hz, 2H), 2.52 (dq, *J* = 23.7, 7.0 Hz, 4H). <sup>13</sup>C NMR (150 MHz, CDCl<sub>3</sub>) δ 168.47, 166.90, 153.40, 135.33, 134.03, 132.18, 129.79, 127.96, 126.08, 124.24, 123.35, 121.61, 121.05, 37.59, 33.29, 27.18, 26.82. HRMS calcd. for C<sub>21</sub>H<sub>19</sub>N<sub>2</sub>O<sub>2</sub>S<sub>2</sub><sup>+</sup> [M+H]<sup>+</sup>: 395.0883, Found: 395.0899.

**(Z)-6-(benzothiazol-2-ylthio)hex-3-en-1-ol (3m):** The title compound was prepared following a literature procedure.<sup>5</sup> To a 20-mL flame-dried vial with a magnetic stir bar in a glovebox under nitrogen atmosphere were added 2-(but-3-en-1-ylthio)benzothiazole (**1**) (1.0 mmol, 1 equiv) and but-3-en-1-ol (2.0 mmol, 2 equiv). To this mixture was added Grubbs Z-selective catalyst (Grubbs C675) dissolved in THF (2.5 mol%, 2.5 mL, 0.01 M).

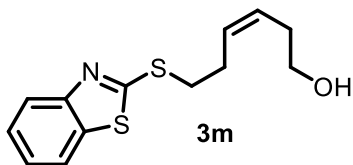

The solution was allowed to stir in an uncapped vial in the glovebox under nitrogen atmosphere for 24 h. The crude reaction mixture was filtered through a pad of Celite and the solvent was removed *in vacuo*. MeCN (1 mL) was added to the crude mixture, and the crude residue was purified by mass-directed prep LC. The crude material was purified on a Waters Autopurification LC with a Waters BEH C18 column (19×160 mm, 5 mm) using a 0.1% aqueous formic acid:acetonitrile gradient (30 mL/min, main segment of gradient at 55–75% acetonitrile over 8 min) at ambient temperature. Fractionation was triggered by a Waters QDa single quadrupole mass spec in ESI+ ( $m/z = 266.1$  [M+H], cone voltage 15V). Purification afforded **3m** as a clear liquid (35 mg, 30%). <sup>1</sup>H NMR (600 MHz, CDCl<sub>3</sub>) δ 7.87 (dd,  $J = 8.2, 1.0$  Hz, 1H), 7.75 (dd,  $J = 8.0, 1.2$  Hz, 1H), 7.42 (ddd,  $J = 8.3, 7.2, 1.3$  Hz, 1H), 7.30 (ddd,  $J = 8.2, 7.3, 1.2$  Hz, 1H), 5.65 (ddt,  $J = 12.5, 7.4, 1.5$  Hz, 1H), 5.55 (ddt,  $J = 10.5, 7.5, 1.4$  Hz, 1H), 3.71 (t,  $J = 6.3$  Hz, 2H), 3.39 (t,  $J = 7.4$  Hz, 2H), 2.62 (qd,  $J = 7.5, 1.3$  Hz, 2H), 2.38 (td,  $J = 7.7, 7.0, 5.6$  Hz, 2H). <sup>13</sup>C NMR (150 MHz, CDCl<sub>3</sub>) δ 167.18, 153.28, 135.31, 129.67, 128.63, 126.22, 124.40, 121.49, 121.13, 62.16, 33.23, 31.18, 27.57. HRMS calcd. for C<sub>13</sub>H<sub>15</sub>NOS<sub>2</sub><sup>+</sup> [M+H]<sup>+</sup>: 266.0668, Found: 266.0682.

**2-(pent-4-en-1-ylthio)benzothiazole (3n):** The title compound was prepared according to General Procedure 1. The crude residue was purified by SiO<sub>2</sub> gel column chromatography (5% Et<sub>2</sub>O/hexanes). Purification afforded **3n** as a yellow liquid (234 mg, >95%). <sup>1</sup>H NMR (600 MHz, CDCl<sub>3</sub>) δ 7.92–7.81 (m, 1H), 7.75 (dd,  $J = 8.0, 1.2$  Hz, 1H), 7.41 (ddd,  $J = 8.3, 7.2, 1.3$  Hz, 1H), 7.33–7.26 (m, 1H), 5.83 (ddt,  $J = 16.9, 10.2, 6.7$  Hz, 1H), 5.09 (dd,  $J = 17.1, 1.7$  Hz, 1H), 5.03 (dd,  $J = 10.2, 1.6$  Hz, 1H), 3.36 (t,  $J = 7.3$  Hz, 2H), 2.26 (q,  $J = 6.7$  Hz, 2H), 1.94 (p,  $J = 7.3$  Hz, 2H). <sup>13</sup>C NMR (150 MHz, CDCl<sub>3</sub>) δ 167.21, 153.48, 137.33, 135.33, 126.14, 124.28, 121.63, 121.06, 115.88, 33.03, 32.77, 28.52. HRMS calcd. for C<sub>12</sub>H<sub>14</sub>NS<sub>2</sub><sup>+</sup> [M+H]<sup>+</sup>: 236.0569, Found: 236.0562.

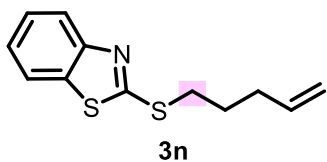

**2-(hex-5-en-1-ylthio)benzothiazole (3o):** The title compound was prepared according to General Procedure 2. The crude residue was purified by SiO<sub>2</sub> gel column chromatography (5% Et<sub>2</sub>O/hexanes). Purification afforded **3o** as a clear liquid (244 mg, >95%). <sup>1</sup>H NMR (600 MHz, CDCl<sub>3</sub>) δ 7.87 (d,  $J = 8.1$  Hz, 1H), 7.75 (dd,  $J = 8.0, 1.2$  Hz, 1H), 7.41 (t,  $J = 7.7$  Hz, 1H), 7.29 (t,  $J = 7.6$  Hz, 1H), 5.81 (ddt,  $J = 16.9, 10.2, 6.7$  Hz, 1H), 5.03 (dd,  $J = 17.2, 1.8$  Hz, 1H), 4.97 (dd,  $J = 10.2, 1.8$  Hz, 1H), 3.36 (t,  $J = 7.4$  Hz, 2H), 2.12 (q,  $J = 7.1$  Hz, 2H), 1.85 (p,  $J = 7.4$  Hz, 2H), 1.63–1.56 (m, 2H). <sup>13</sup>C NMR (150 MHz, CDCl<sub>3</sub>) δ 167.38, 153.49, 138.35, 135.31, 126.14, 124.26, 121.60, 121.06,

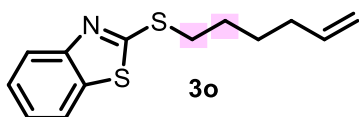

115.08, 33.57, 33.31, 28.82, 28.09. **HRMS** calcd. for  $C_{13}H_{16}NS_2^+$   $[M+H]^+$ : 250.0719, Found: 250.0712.

**2-(hex-5-en-1-ylthio)benzothiazole (3p):** The title compound was prepared from 5-bromo-2,3-

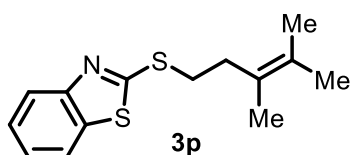

dimethylpent-2-ene<sup>6</sup> according to General Procedure 2. The crude residue was purified by  $SiO_2$  gel column chromatography (5%  $Et_2O$ /hexanes). Purification afforded **3p** as an orange liquid (256 mg, >95%). **<sup>1</sup>H NMR** (600 MHz,  $CDCl_3$ )  $\delta$  7.86 (d,  $J = 8.1$  Hz, 1H), 7.75 (d,  $J = 8.0$  Hz, 1H), 7.45–7.38 (m, 1H), 7.29 (d,  $J = 7.9$  Hz, 1H), 3.39–

3.29 (m, 2H), 2.56 (t,  $J = 7.9$  Hz, 2H), 1.73 (s, 6H), 1.67 (s, 3H). **<sup>13</sup>C NMR** (150 MHz,  $CDCl_3$ )  $\delta$  167.44, 153.51, 135.35, 127.44, 126.10, 125.26, 124.21, 121.57, 121.06, 34.37, 32.32, 20.82, 20.56, 18.43. **HRMS** calcd. for  $C_{14}H_{18}NS_2^+$   $[M+H]^+$ : 264.0875, Found: 264.0873.

**(E)-2-((3-methylpent-3-en-1-yl)thio)benzothiazole (3q):** The title compound was prepared from

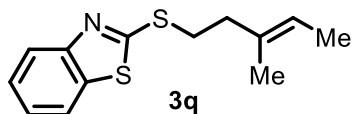

(*E*)-5-bromo-3-methylpent-2-ene<sup>7</sup> according to General Procedure 2. The crude residue was purified by  $SiO_2$  gel column chromatography (5%  $Et_2O$ /hexanes). Purification afforded **3q** as a white solid (249 mg, >95%). **<sup>1</sup>H NMR** (600 MHz,  $CDCl_3$ )  $\delta$  7.86 (m, 1H), 7.79–7.73 (m, 1H), 7.47–7.37 (m, 1H), 7.32–

7.26 (m, 1H), 5.41–5.30 (m, 1H), 3.43 (t,  $J = 7.6$  Hz, 2H), 2.49 (t,  $J = 7.6$  Hz, 2H), 1.69 (s, 3H), 1.63–1.58 (m, 3H). **<sup>13</sup>C NMR** (150 MHz,  $CDCl_3$ )  $\delta$  167.42, 153.50, 135.31, 133.29, 126.11, 124.23, 121.59, 121.31, 121.04, 39.11, 32.46, 15.59, 13.56. **HRMS** calcd. for  $C_{13}H_{16}NS_2^+$   $[M+H]^+$ : 250.0719, Found: 250.0706.

**2-((6-methylhept-5-en-2-yl)thio)benzothiazole (3r):** The title compound was prepared according

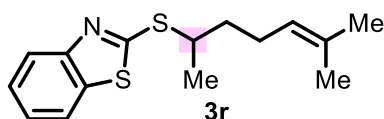

to General Procedure 1. The crude residue was purified by  $SiO_2$  gel column chromatography (5%  $Et_2O$ /hexanes). Purification afforded **3r** as a yellow liquid (274 mg, >95%). **<sup>1</sup>H NMR** (600 MHz,  $CDCl_3$ )  $\delta$  7.88 (d,  $J = 8.1$  Hz, 1H), 7.76 (dd,  $J = 8.0, 1.2$  Hz, 1H), 7.41 (t,  $J =$

8.1 Hz, 1H), 7.29 (t,  $J = 8.0$  Hz, 1H), 5.13 (tt,  $J = 7.0, 1.6$  Hz, 1H), 3.96 (h,  $J = 6.8$  Hz, 1H), 2.31–2.08 (m, 2H), 1.84 (ddt,  $J = 13.8, 8.5, 6.8$  Hz, 1H), 1.77–1.70 (m, 1H), 1.70 (s, 3H), 1.61 (s, 3H), 1.52 (d,  $J = 6.8$  Hz, 3H). **<sup>13</sup>C NMR** (150 MHz,  $CDCl_3$ )  $\delta$  166.77, 153.58, 135.47, 132.77, 126.09, 124.31, 123.33, 121.73, 121.02, 44.27, 36.92, 25.88, 25.72, 21.70, 17.87. **HRMS** calcd. for  $C_{15}H_{20}NS_2^+$   $[M+H]^+$ : 278.1032, Found: 278.1037.

## Oxidative Heck Reaction Design of Experiment

During reaction optimization, other product isomers were occasionally observed by  $^1\text{H-NMR}$  analysis of the crude reaction mixture. Below is a representative example of a  $^1\text{H-NMR}$  spectrum of the mixture of products from a concentrated (0.1 mM), unoptimized oxidative Heck reaction of (Z)-2-(hex-3-en-1-ylthio)benzothiazole ((Z)-**I**).

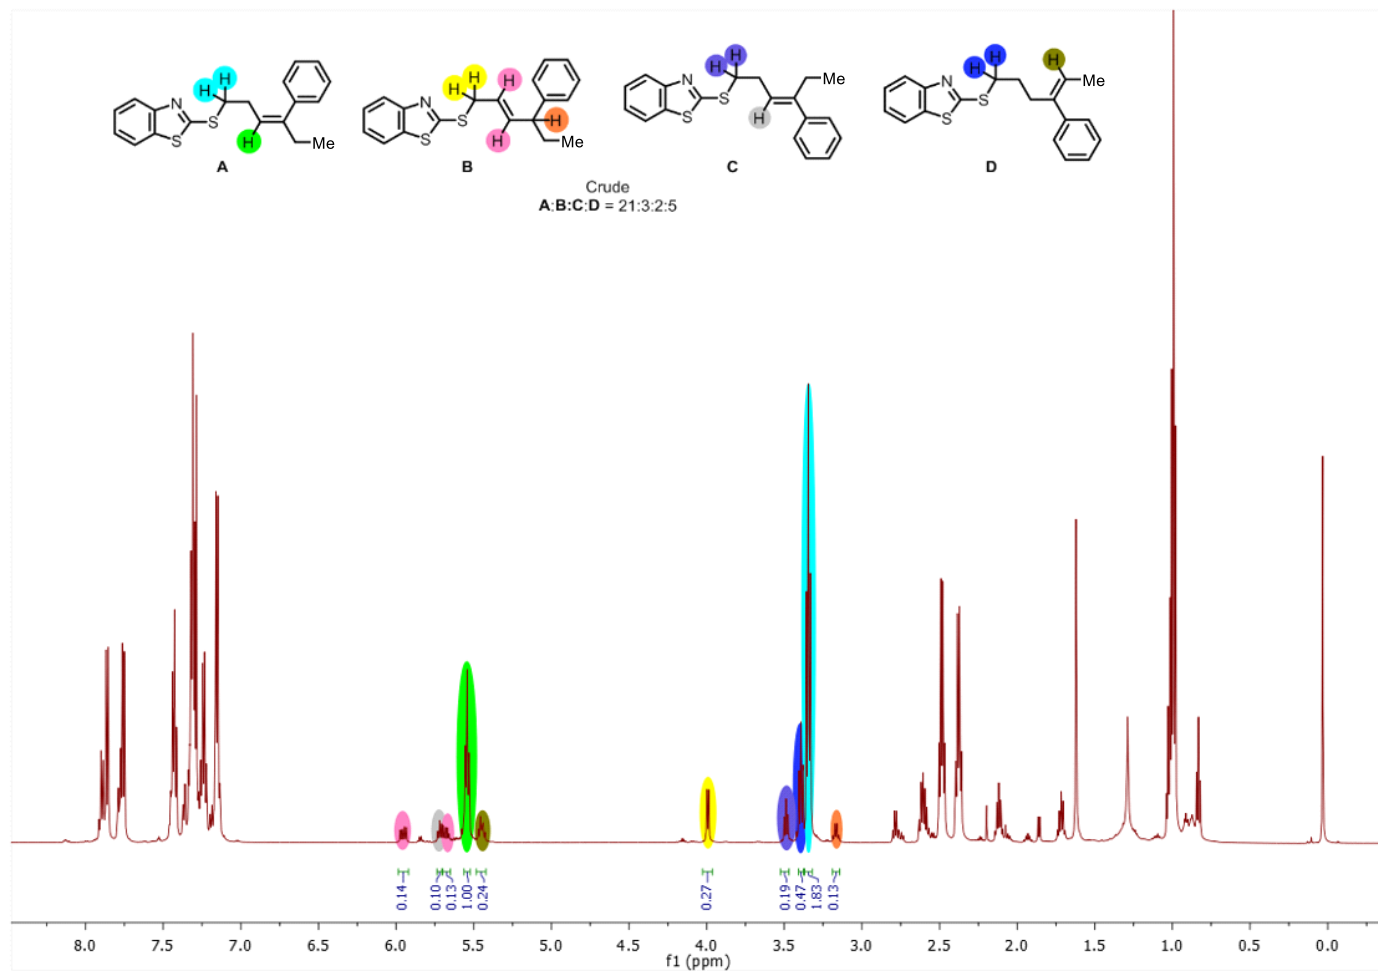

**Table S1.** Model Reaction under Investigation

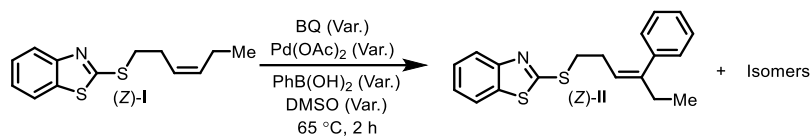

|        | DMSO    | Benzoquinone | Pd(OAc) <sub>2</sub> | Phenylboronic Acid |
|--------|---------|--------------|----------------------|--------------------|
| Low    | 0.100 M | 0.7 equiv    | 2.5 mol%             | 1.0 equiv          |
| Medium | 0.075M  | 1.0 equiv    | 5.0 mol%             | 1.2 equiv          |
| High   | 0.050 M | 1.3 equiv    | 7.5 mol%             | 1.4 equiv          |

**A. Design of Experiment Setup:** Concentrated stock solutions of benzoquinone, palladium(II) acetate, phenylboronic acid, and (Z)-2-(hex-3-en-1-yl-thio)benzothiazole were prepared in DMSO. (Z)-2-(hex-3-en-1-yl-thio)benzothiazole (0.1 mmol) was loaded into 81 reaction vessels from the stock solution using a multichannel pipette. The reaction vessels in metal heating block were placed on the Unchained Labs Freeslate robotic platform and charged with every combination of the above high, medium, and low values for each reagent noted reagent to build a response-surface reaction space. The reaction was heated at 65 °C and sampling was performed at 2 h. Relative yields were measured using and LCMS. The data was then processed through JMP statistical software to build a reaction space.

**B. Photography of Setup:**

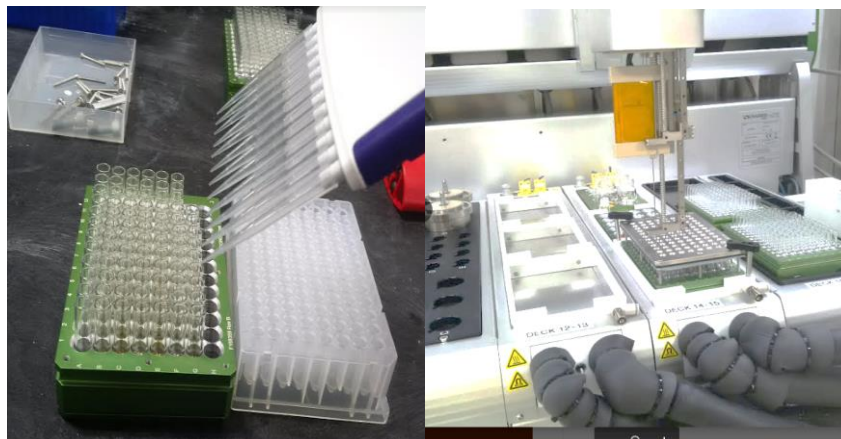

**Figure S1.** Photographic depiction of setup described in section A above displaying preparation of starting material using multichannel pipette (left) and sampling of the reaction at 2 h (right).



**Table S2.** Log-Worth Values of Reagents

| 2 hour run                                               |           |
|----------------------------------------------------------|-----------|
| Substrate                                                | Log-Worth |
| Palladium acetate (mol%)                                 | 18.1      |
| DMSO (concentration)                                     | 13.9      |
| Palladium acetate (mol%) *<br>DMSO (concentration)       | 7.2       |
| Palladium acetate (mol%) *<br>Phenylboronic acid (equiv) | 2.6       |

### C. JMP Statistical Software Analysis

Through use of JMP statistical software, the value of each reagent as it pertains to yield was determined for the 2 hour time point. The reagents, or combinations thereof, that statistically provide the greatest leverage are displayed along with their log-worth values (Table S2).

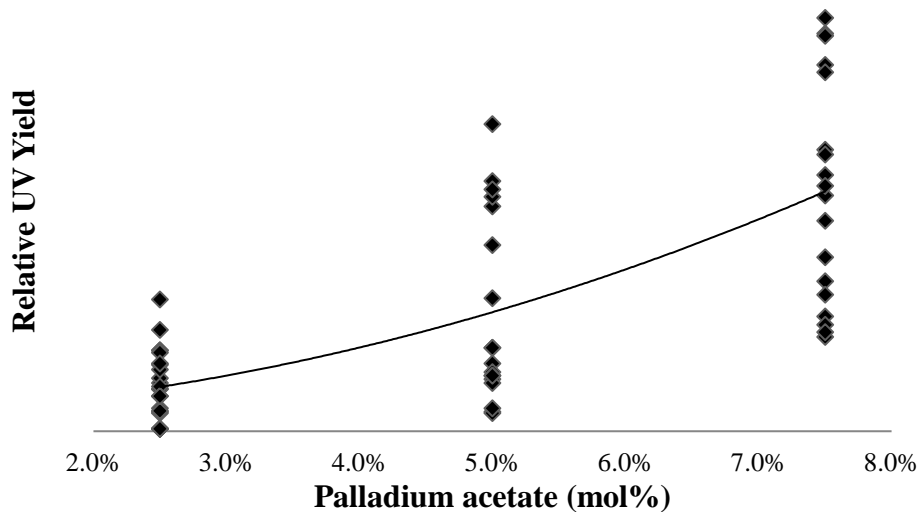

**Figure S2.** Palladium acetate (mol%) is plotted against the Relative UV-yield at 2 h. As could be anticipated, an increase in catalyst generally provides an increase in yield.

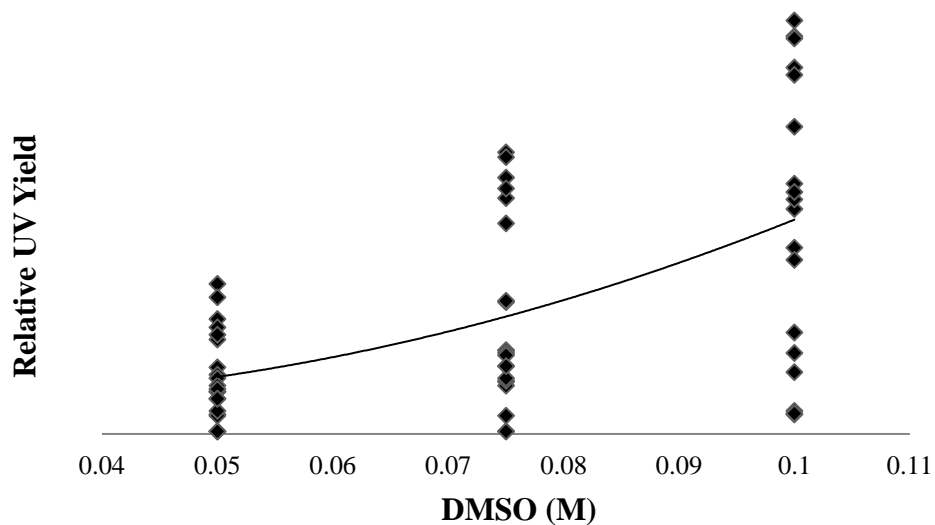

**Figure S3.** DMSO (M) is plotted against the Relative UV-yield at 2 h. There is slightly greater spread in this data giving the DMSO variable a bit less log-worth in the reaction space meaning that it has somewhat less effect on yield.

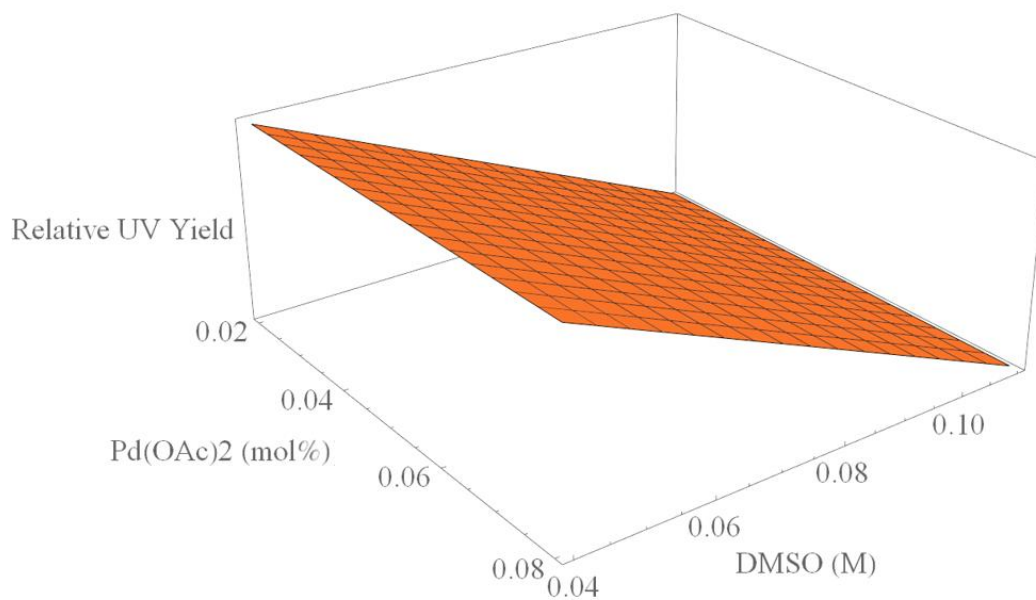

**Figure S4.** Relative UV Yield is plotted in relation to palladium acetate loading and concentration of reaction in DMSO, as measured by molarity, using Wolfram Mathematica 11.1. This graph shows a representation of the reaction space based on the design of experiment results.

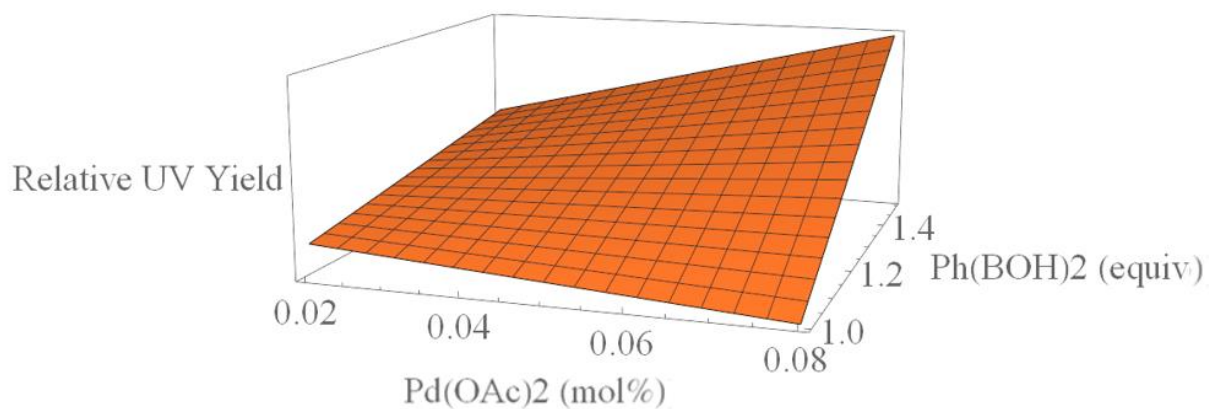

**Figure S5.** UV yield is plotted in relation to palladium acetate loading and phenylboronic acid loading using Wolfram Mathematica 11.1. This graph shows a representation of the reaction space based on the design of experiment results.

**Table S3.** Design-of-Experiment-Guided Reactions

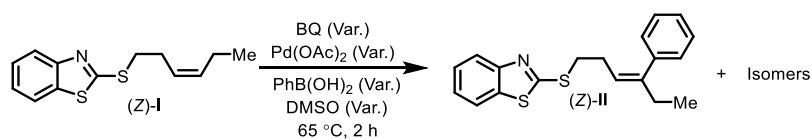

|          | Benzoquinone (equiv) | Pd(OAc) <sub>2</sub> (mol%) | Phenylboronic acid (equiv) | DMSO (M) | Conversion (NMR) | Desired Product (NMR) |
|----------|----------------------|-----------------------------|----------------------------|----------|------------------|-----------------------|
| <b>1</b> | 1.5                  | 7.5                         | 1.1                        | 0.1      | 99%              | 50%                   |
| <b>2</b> | 1.5                  | 2.5                         | 1.4                        | 0.1      | 94%              | 58%                   |
| <b>3</b> | 1.5                  | 7.5                         | 1.4                        | 0.05     | 99%              | 84%*                  |

\*Isolated yield: 91%

## Directing Group Optimization for Oxidative Heck Reaction

**Table S4.** Optimization of Directing Group for Terminal Alkene in Oxidative Heck Reaction<sup>a</sup>

| Directing Group (DG) | Yield (VII)       | Directing Group (DG) | Yield (VII) | Directing Group (DG) | Yield (VII) |
|----------------------|-------------------|----------------------|-------------|----------------------|-------------|
|                      | 76%               |                      | 50%         |                      | 54%         |
|                      | <15% <sup>b</sup> |                      | 50%         |                      | 44%         |

<sup>a</sup>Isolated yields except where otherwise noted. <sup>b</sup>Determined by <sup>1</sup>H-NMR of the crude reaction using 1,3,5-trimethoxybenzene as internal standard. <sup>c</sup>Starting material. <sup>d</sup>Product.

## Control Experiments on 8-Aminoquinoline Directed Oxidative Heck Reaction

**Table S5.** Control Experiments on 8-Aminoquinoline Directed Oxidative Heck Reaction

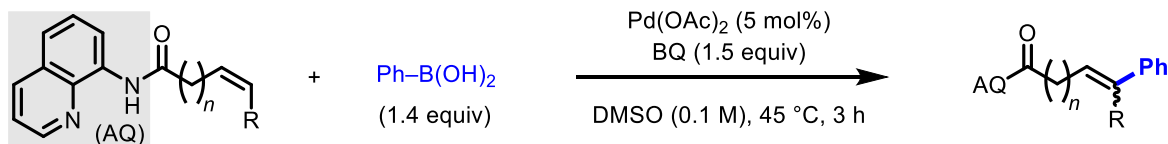

| R  | n | Temp. | Yield <sup>a</sup>       |
|----|---|-------|--------------------------|
| H  | 1 | 45    | <i>n.r.</i> <sup>b</sup> |
| H  | 1 | 65    | <i>n.r.</i> <sup>b</sup> |
| H  | 1 | 110   | < 5%                     |
| H  | 2 | 45    | <i>n.r.</i> <sup>b</sup> |
| H  | 2 | 65    | < 5%                     |
| H  | 2 | 110   | < 5%                     |
| Et | 1 | 45    | <i>n.r.</i> <sup>b</sup> |
| Et | 1 | 65    | <i>n.r.</i> <sup>b</sup> |
| Et | 1 | 110   | < 5%                     |

<sup>a</sup>Determined by LCMS. <sup>b</sup>*n.r.*=no reaction.

## General Procedures for Oxidative Heck Reaction

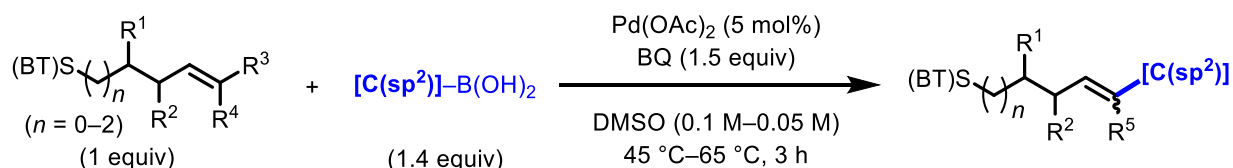

**Scheme S4.** General Procedure for Oxidative Heck Reaction.

**General Procedure for Oxidative Heck Reaction:** To a 1-dram (4 mL) vial equipped with magnetic stir bar were added alkene (0.10 mmol, 1 equiv), boronic acid (0.14 mmol, 1.4 equiv), benzoquinone (0.15 mmol, 1.5 equiv), Pd(OAc)<sub>2</sub> (0.005 mmol, 5 mol%), and DMSO in air. The reaction was placed on a hot plate that was pre-heated to the correct temperature. Except for when otherwise mentioned, after 3 h, the reaction was brought to room temperature. The organic materials were separated from the DMSO by addition of 5% LiCl in H<sub>2</sub>O (10 mL), followed by extraction with EtOAc (3 × 5 mL) and dried with Na<sub>2</sub>SO<sub>4</sub>. The solvent was removed *in vacuo*, and the crude residue was purified by SiO<sub>2</sub> gel column chromatography, preparative TLC, or mass-directed prep LC.

- **General Procedure 3:**

DMSO (1 mL, 0.1 M), 45 ° C

- **General Procedure 4:**

DMSO (2 mL, 0.05 M), 6 h, 45 ° C

- **General Procedure 5:**

DMSO (2 mL, 0.05M), 65 ° C

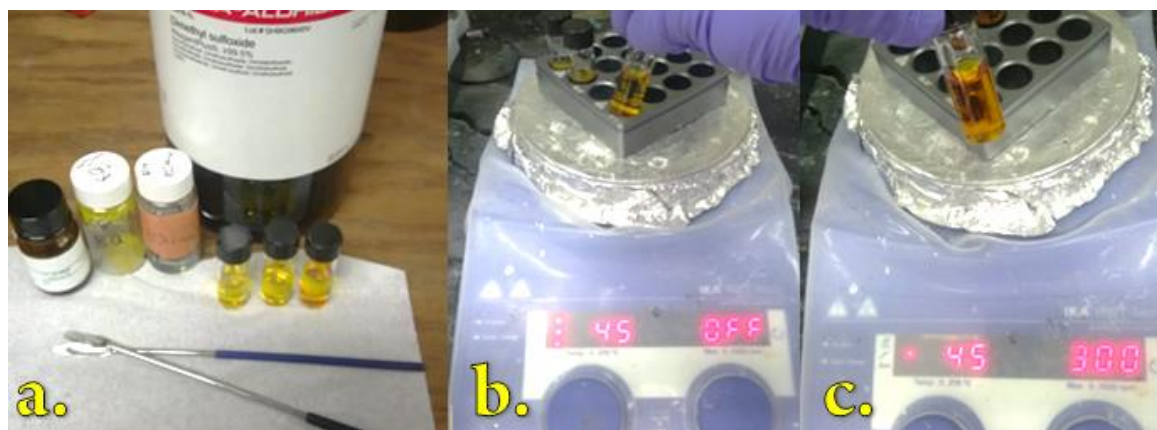

**Figure S6.** Photographic depiction of reaction setup according to General Procedure 3. From left to right: a) preparation of materials. b) reaction at 0 min before heating. c) reaction at 3 h after heating.

## Characterization Data for Oxidative Heck Products

**(E)-1-phenyl-5-((4-phenylhex-3-en-1-yl)thio)-1H-tetrazole ((E)-II-G):** The title compound was prepared according to General Procedure 4. The crude residue was purified by preparative TLC (10% Et<sub>2</sub>O/hexanes). Purification afforded (E)-II-G as a clear liquid (24 mg, 67%) containing 22% inseparable isomers. <sup>1</sup>H NMR (600 MHz, CDCl<sub>3</sub>) δ 7.65–7.48 (m, 5H), 7.32–7.04 (m, 5H), 5.63 (t, *J* = 7.2 Hz, 1H), 3.51 (t, *J* = 7.3 Hz, 2H), 2.76 (q, *J* = 7.2 Hz, 2H), 2.51 (q, *J* = 7.5 Hz, 2H), 0.95 (t, *J* = 7.5 Hz, 3H). <sup>13</sup>C NMR (150 MHz, CDCl<sub>3</sub>) δ 154.50, 144.93, 142.48, 140.52, 133.87, 130.24, 129.93, 128.44, 126.49, 124.05, 124.00, 33.50, 28.19, 23.28, 13.67. HRMS calcd. for C<sub>19</sub>H<sub>21</sub>N<sub>4</sub>S<sup>+</sup> [M+H]<sup>+</sup>: 337.1482, Found: 337.1485.

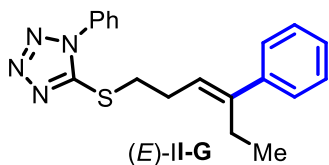

**(E)-2-((4-phenylhex-3-en-1-yl)thio)benzoxazole ((E)-II-I):** The title compound was prepared according to General Procedure 4. The crude residue was purified by preparative TLC (5% Et<sub>2</sub>O/hexanes). Purification afforded (E)-II-I as a yellow liquid (10 mg, 32%). <sup>1</sup>H NMR (600 MHz, CDCl<sub>3</sub>) δ 7.54 (d, *J* = 8.0 Hz, 1H), 7.39 – 7.32 (m, 1H), 7.29 – 7.08 (m, 7H), 5.61 (d, *J* = 7.9 Hz, 1H), 3.72 – 3.20 (m, 2H), 2.79 – 2.56 (m, 2H), 2.56 – 2.35 (m, 2H), 0.92 (dt, *J* = 8.1, 4.0 Hz, 3H). <sup>13</sup>C NMR (150 MHz, CDCl<sub>3</sub>) δ 165.14, 152.00, 144.67, 142.60, 142.17, 128.36, 127.03, 126.54, 124.53, 124.41, 123.96, 118.53, 109.99, 32.44, 28.49, 23.30, 13.69. HRMS calcd. for C<sub>19</sub>H<sub>20</sub>NOS<sub>2</sub> [M+H]<sup>+</sup>: 310.1266, Found: 310.1269.

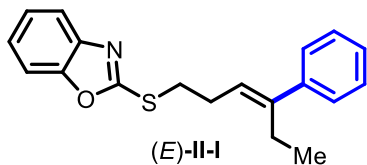

**(E)-2-((4-phenylhex-3-en-1-yl)thio)benzothiophene ((E)-II-J):** The title compound was prepared according to General Procedure 4. The crude residue was purified by preparative TLC (5% Et<sub>2</sub>O/hexanes). Purification afforded (E)-II-J as a yellow liquid (28 mg, 86%). <sup>1</sup>H NMR (600 MHz, CDCl<sub>3</sub>) δ 7.75 (d, *J* = 8.0 Hz, 1H), 7.72 – 7.64 (m, 1H), 7.31 (dq, *J* = 14.8, 7.9, 7.4 Hz, 7H), 7.25 – 7.21 (m, 1H), 5.65 (t, *J* = 7.3 Hz, 1H), 3.05 (t, *J* = 7.4 Hz, 2H), 2.59 (q, *J* = 7.4 Hz, 2H), 2.49 (q, *J* = 7.5 Hz, 2H), 0.96 (t, *J* = 7.5 Hz, 3H). <sup>13</sup>C NMR (150 MHz, CDCl<sub>3</sub>) δ 143.90, 142.68, 141.79, 139.97, 137.36, 128.34, 128.21, 126.93, 126.49, 125.05, 124.61, 124.48, 123.15, 122.00, 37.61, 28.83, 23.24, 13.70. HRMS calcd. for C<sub>20</sub>H<sub>21</sub>S<sub>2</sub><sup>+</sup> [M+H]<sup>+</sup>: 325.1085, Found: 325.1088.

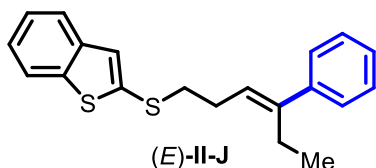

**(E)-2-((4-phenylhex-3-en-1-yl)thio)benzothiazole ((E)-II-K):** The title compound was prepared according to General Procedure 4. The crude residue was purified by preparative TLC (5% Et<sub>2</sub>O/hexanes). Purification afforded (E)-II-K as a yellow liquid (28 mg, 85%). <sup>1</sup>H NMR (600 MHz, CDCl<sub>3</sub>) δ 7.88 (dt, *J* = 8.2, 0.8 Hz, 1H), 7.76 (dt, *J* = 8.0, 0.9 Hz, 1H), 7.42 (ddd, *J* = 8.3, 7.2, 1.3 Hz, 1H), 7.36–7.32 (m, 2H), 7.30 (td, *J* = 7.6, 1.3 Hz, 3H), 7.25–7.21 (m, 1H), 5.69 (t, *J* = 7.4 Hz, 1H), 3.51–3.43 (m, 2H), 2.76 (q, *J* = 7.4 Hz, 2H), 2.56 (q, *J* = 7.6 Hz, 2H), 1.00 (t, *J* = 7.5 Hz, 3H). <sup>13</sup>C NMR (150 MHz, CDCl<sub>3</sub>) δ 167.07, 153.48, 144.46,

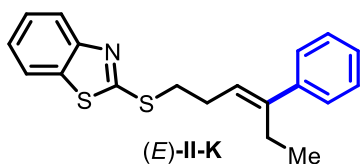

142.64, 135.40, 128.35, 126.99, 126.53, 126.16, 124.79, 124.30, 121.61, 121.10, 33.64, 28.58, 23.28, 13.76. **HRMS** calcd. for  $C_{19}H_{20}NS_2$   $[M+H]^+$ : 326.1037, Found: 326.1034.

**(E)-2-((4-phenylhex-3-en-1-yl-3-d)thio)benzothiazole ((E)-I-d)**: The title compound was prepared

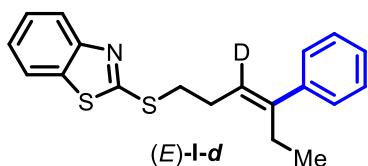

according to General Procedure 4. The crude residue was purified by preparative TLC (5%  $Et_2O$ /hexanes). Purification afforded (*E*)-**I-d** as a yellow liquid (17 mg, 52%).  $^1H$  NMR (600 MHz,  $CDCl_3$ )  $\delta$  7.88 (d,  $J = 8.1$  Hz, 1H), 7.78 – 7.71 (m, 1H), 7.47 – 7.39 (m, 1H), 7.38 – 7.32 (m, 2H), 7.32 – 7.28 (m, 3H), 7.25 – 7.21 (m, 1H), 3.46 (t,  $J = 7.4$  Hz, 2H), 2.75 (t,  $J = 7.4$  Hz, 2H), 2.56 (q,  $J = 7.5$  Hz, 2H), 1.00

(t,  $J = 7.5$  Hz, 3H).  $^{13}C$  NMR (150 MHz,  $CDCl_3$ )  $\delta$  167.08, 153.49, 144.37, 142.61, 135.40, 128.35, 126.99, 126.53, 126.16, 124.31, 121.62, 121.11, 33.62, 28.48, 23.23, 13.76. **HRMS** calcd. for  $C_{19}H_{19}DNS_2$   $[M+H]^+$ : 327.1100, Found: 327.1106.

**(E)-5-chloro-2-((4-phenylhex-3-en-1-yl)thio)benzothiazole ((E)-II-M)**: The title compound was

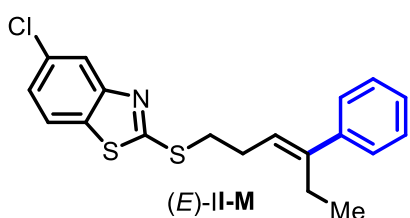

prepared according to General Procedure 4. The crude residue was purified by preparative TLC (5%  $Et_2O$ /hexanes). Purification afforded (*E*)-**II-M** as a yellow solid (21 mg, 59%).  $^1H$  NMR (600 MHz,  $CDCl_3$ )  $\delta$  7.86 (d,  $J = 2.1$  Hz, 1H), 7.65 (d,  $J = 8.5$  Hz, 1H), 7.41–7.01 (m, 6H), 5.68 (t,  $J = 7.3$  Hz, 1H), 3.46 (t,  $J = 7.4$  Hz, 2H), 2.75 (q,  $J = 7.4$  Hz, 2H), 2.56 (q,  $J = 7.5$  Hz, 2H), 1.00 (t,  $J = 7.5$  Hz, 3H).

$^{13}C$  NMR (150 MHz,  $CDCl_3$ )  $\delta$  169.35, 154.29, 144.59, 142.57, 133.62, 132.23, 128.36, 127.04, 126.52, 124.64, 124.62, 121.69, 121.49, 33.66, 28.50, 23.28, 13.77. **HRMS** calcd. for  $C_{19}H_{19}ClNS_2^+$   $[M+H]^+$ : 360.0642, Found: 360.0651.

**(E)-6-ethoxy-2-((4-phenylhex-3-en-1-yl)thio)benzothiazole ((E)-II-N)**: The title compound was

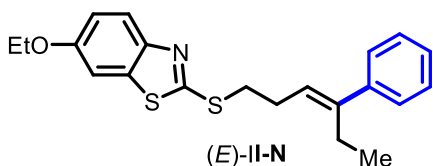

prepared according to General Procedure 4. The crude residue was purified by preparative TLC (5%  $Et_2O$ /hexanes). Purification afforded (*E*)-**II-N** as a yellow liquid (24 mg, 65%).  $^1H$  NMR (600 MHz,  $CDCl_3$ )  $\delta$  7.75 (d,  $J = 8.9$  Hz, 1H), 7.35–7.32 (m, 2H), 7.30 (t,  $J = 7.6$  Hz, 2H), 7.25–7.21 (m, 2H), 7.01

(dd,  $J = 8.9, 2.5$  Hz, 1H), 5.68 (t,  $J = 7.3$  Hz, 1H), 4.07 (q,  $J = 6.9$  Hz, 2H), 3.42 (t,  $J = 7.4$  Hz, 2H), 2.73 (q,  $J = 7.4$  Hz, 2H), 2.55 (q,  $J = 7.5$  Hz, 2H), 1.45 (t,  $J = 7.0$  Hz, 4H), 0.99 (t,  $J = 7.5$  Hz, 3H).  $^{13}C$  NMR (150 MHz,  $CDCl_3$ )  $\delta$  163.64, 156.50, 147.99, 144.36, 142.66, 136.72, 128.34, 126.97, 126.53, 124.87, 122.08, 115.39, 105.00, 64.28, 33.82, 28.65, 23.27, 15.00, 13.76. **HRMS** calcd. for  $C_{21}H_{24}NOS_2^+$   $[M+H]^+$ : 370.1294, Found: 370.1299.

**(E)-2-((4-phenylhex-3-en-1-yl)thio)-5-(trifluoromethoxy)benzothiazole ((E)-II-O):** The title compound was prepared according to General Procedure 4. The crude residue was purified by preparative TLC (10% Et<sub>2</sub>O/hexanes). Purification afforded (E)-II-O as a clear liquid (16 mg, 40%). <sup>1</sup>H NMR (600 MHz, CDCl<sub>3</sub>) δ 7.78–7.67 (m, 2H), 7.37–7.12 (m, 6H), 5.68 (t, *J* = 7.3 Hz, 1H), 3.47 (t, *J* = 7.4 Hz, 2H), 2.76 (q, *J* = 7.4 Hz, 2H), 2.56 (q, *J* = 7.5 Hz, 2H), 1.00 (t, *J* = 7.5 Hz, 3H). <sup>13</sup>C NMR (150 MHz, CDCl<sub>3</sub>) δ 170.15, 154.09, 147.99, 144.63, 142.57, 133.71, 128.37, 127.05, 126.52, 124.59, 121.67, 117.72, 114.10, 33.67, 28.49, 23.28, 13.75. <sup>19</sup>F NMR (376 MHz, CDCl<sub>3</sub>) δ -58.99. HRMS calcd. for C<sub>20</sub>H<sub>19</sub>F<sub>3</sub>NOS<sub>2</sub><sup>+</sup> [M+H]<sup>+</sup>: 410.0855, Found: 410.0858.

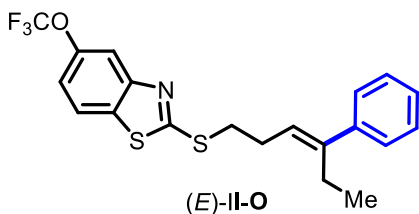

**(Z)-1-phenyl-5-((4-phenylhex-3-en-1-yl)thio)-1H-tetrazole ((Z)-II-G):** The title compound was prepared according to General Procedure 4. The crude residue was purified by preparative TLC (10% Et<sub>2</sub>O/hexanes). Purification afforded (Z)-II-G as a clear liquid (19 mg, 56%) containing 26% inseparable isomers. Because all of the peaks belonging to each of the two isomers could not be clearly resolved for the <sup>13</sup>C NMR spectrum, the analytical data below correspond to the mixture. <sup>1</sup>H NMR (600 MHz, CDCl<sub>3</sub>) δ 7.61–7.47 (m, 5H), 7.33–7.04 (m, 5H), 5.46 (tt, *J* = 7.3, 1.4 Hz, 1H), 3.38 (t, *J* = 7.3 Hz, 2H), 2.44 (qt, *J* = 7.3, 1.1 Hz, 2H), 1.69 (p, *J* = 7.3 Hz, 2H), 0.95 (t, *J* = 7.4 Hz, 3H). <sup>13</sup>C NMR (150 MHz, CDCl<sub>3</sub>) δ 173.44, 154.43, 153.95, 146.22, 144.00, 140.88, 140.47, 133.89, 130.23, 130.17, 129.92, 129.88, 128.62, 128.46, 128.39, 128.27, 127.67, 127.11, 126.87, 126.49, 126.43, 126.38, 124.07, 124.00, 123.94, 122.87, 122.05, 62.25, 50.49, 35.82, 34.21, 33.62, 32.28, 32.08, 29.86, 29.64, 29.52, 29.43, 29.28, 28.71, 28.51, 25.02, 22.85, 14.27, 13.00, 12.24, 0.15. HRMS calcd. for C<sub>19</sub>H<sub>21</sub>N<sub>4</sub>S<sup>+</sup> [M+H]<sup>+</sup>: 337.1482, Found: 337.1489.

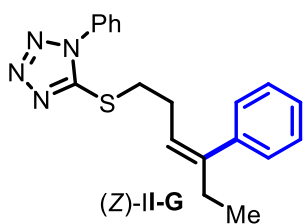

**(Z)-2-((4-phenylhex-3-en-1-yl)thio)benzooxazole ((Z)-II-I):** The title compound was prepared according to General Procedure 5. The crude residue was purified by preparative TLC (5% Et<sub>2</sub>O/hexanes). Purification afforded (Z)-II-I as a yellow liquid (7 mg, 23%). <sup>1</sup>H NMR (600 MHz, CDCl<sub>3</sub>) δ 7.56 (dd, *J* = 7.7, 1.3 Hz, 1H), 7.47–7.33 (m, 1H), 7.29–7.25 (m, 3H), 7.22 (td, *J* = 7.7, 1.4 Hz, 1H), 7.20–7.16 (m, 1H), 7.14–7.10 (m, 2H), 5.50 (tt, *J* = 7.4, 1.5 Hz, 1H), 3.29 (t, *J* = 7.3 Hz, 2H), 2.46 (q, *J* = 7.3 Hz, 2H), 2.37–2.31 (m, 2H), 0.96 (t, *J* = 7.4 Hz, 3H). <sup>13</sup>C NMR (150 MHz, CDCl<sub>3</sub>) δ 165.12, 151.89, 146.03, 142.13, 141.04, 128.34, 128.21, 126.74, 124.32, 123.85, 122.35, 118.47, 109.92, 32.56, 32.31, 28.60, 12.99. HRMS calcd. for C<sub>19</sub>H<sub>20</sub>NOS<sub>2</sub><sup>+</sup> [M+H]<sup>+</sup>: 310.1266, Found: 310.1265.

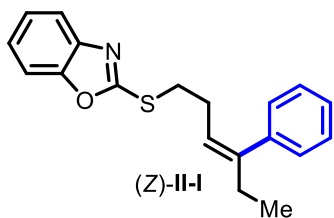



**(Z)-2-((4-phenylhex-3-en-1-yl)thio)benzothiophene ((Z)-II-J):** The title compound was prepared according to General Procedure 5. The crude residue was purified by preparative TLC (5% Et<sub>2</sub>O/hexanes). Purification afforded (Z)-II-J as a yellow liquid (26 mg, 80%). <sup>1</sup>H NMR (600 MHz, CDCl<sub>3</sub>) δ 7.71 (d, *J* = 7.8 Hz, 1H), 7.62 (d, *J* = 7.7 Hz, 1H), 7.35 – 7.16 (m, 5H), 7.12 (s, 1H), 7.09 (d, *J* = 7.5 Hz, 2H), 5.47 (t, *J* = 7.4 Hz, 1H), 2.90 (t, *J* = 7.4 Hz, 2H), 2.33 (dq, *J* = 19.1, 7.4 Hz, 4H), 0.96 (t, *J* = 7.4 Hz, 3H). <sup>13</sup>C NMR (150 MHz, CDCl<sub>3</sub>) δ 145.34, 141.70, 141.14, 139.94, 137.42, 128.36, 128.20, 127.92, 126.68, 124.47, 124.33, 123.07, 122.83, 121.91, 37.79, 32.27, 29.04, 13.04. HRMS calcd. for C<sub>20</sub>H<sub>21</sub>S<sub>2</sub><sup>+</sup> [M+H]<sup>+</sup>: 325.1085, Found: 325.1078.

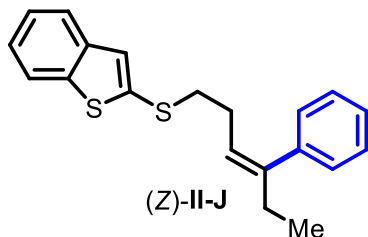

**(Z)-2-((4-phenylhex-3-en-1-yl)thio)benzothiazole ((Z)-II-K):** The title compound was prepared according to General Procedure 5. The crude residue was purified by preparative TLC (5% Et<sub>2</sub>O/hexanes). Purification afforded (Z)-II-K as a yellow liquid (30 mg, 91%). <sup>1</sup>H NMR (600 MHz, CDCl<sub>3</sub>) δ 7.86 (d, *J* = 8.1 Hz, 1H), 7.76 (dd, *J* = 8.0, 1.2 Hz, 1H), 7.43 (ddd, *J* = 8.2, 7.2, 1.3 Hz, 1H), 7.31 (t, *J* = 7.5 Hz, 3H), 7.26–7.20 (m, 1H), 7.17–7.14 (m, 2H), 5.54 (tt, *J* = 7.3, 1.5 Hz, 1H), 3.34 (t, *J* = 7.4 Hz, 2H), 2.48 (q, *J* = 7.3 Hz, 2H), 2.38 (q, *J* = 7.4, 6.8 Hz, 2H), 0.99 (t, *J* = 7.4 Hz, 3H). <sup>13</sup>C NMR (150 MHz, CDCl<sub>3</sub>) δ 167.26, 153.46, 145.78, 141.08, 135.32, 128.39, 128.23, 126.73, 126.08, 124.21, 122.59, 121.58, 121.00, 33.87, 32.33, 28.66, 13.01. HRMS calcd. for C<sub>19</sub>H<sub>20</sub>NS<sub>2</sub><sup>+</sup> [M+H]<sup>+</sup>: 326.1037, Found: 326.1038.

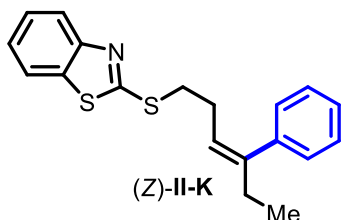

**(Z)-2-((4-phenylhex-3-en-1-yl)thio)thiazolo[5,4-b]pyridine ((Z)-II-L):** The title compound was prepared according to General Procedure 5. The crude residue was purified by mass-directed prep LC. The crude material was purified on a Waters Autopurification LC with a Waters BEH C18 column (19×160 mm, 5 mm) using a 0.1% aqueous formic acid:acetonitrile gradient (30 mL/min, main segment of gradient at 65–95% acetonitrile over 8 min) at ambient temperature. Fractionation was triggered by a Waters QDa single quadrupole mass spec in ESI+ (*m/z* = 327.1 [M+H], cone voltage 15V). Purification afforded (Z)-II-L as a yellow liquid (8 mg, 25%). <sup>1</sup>H NMR (600 MHz, CDCl<sub>3</sub>) δ 8.42 (d, *J* = 4.8 Hz, 1H), 8.00 (d, *J* = 8.2 Hz, 1H), 7.33 (dd, *J* = 8.1, 4.7 Hz, 1H), 7.31–7.17 (m, 4H), 7.12 (d, *J* = 7.5 Hz, 2H), 5.50 (t, *J* = 7.4 Hz, 1H), 3.33 (t, *J* = 7.2 Hz, 2H), 2.46 (q, *J* = 7.3 Hz, 2H), 2.35 (q, *J* = 7.5 Hz, 2H), 0.96 (t, *J* = 7.4 Hz, 3H). <sup>13</sup>C NMR (150 MHz, CDCl<sub>3</sub>) δ 168.89, 158.83, 146.54, 146.03, 145.61, 141.02, 128.35, 128.22, 127.89, 126.76, 122.38, 121.17, 33.23, 32.33, 28.49, 12.99. HRMS calcd. for C<sub>18</sub>H<sub>19</sub>N<sub>2</sub>S<sub>2</sub><sup>+</sup> [M+H]<sup>+</sup>: 327.0984, Found: 327.0989.

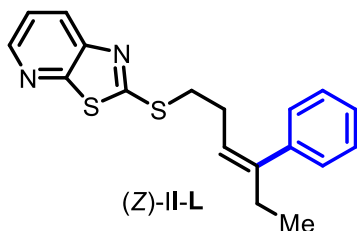

**(Z)-5-chloro-2-((4-phenylhex-3-en-1-yl)thio)benzothiazole ((Z)-II-M):** The title compound was

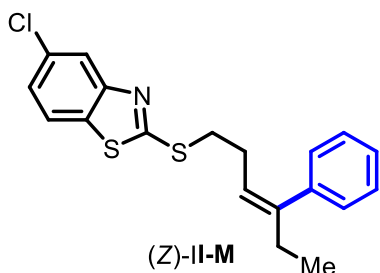

prepared according to General Procedure 5. The crude residue was purified by preparative TLC (5% Et<sub>2</sub>O/hexanes). Purification afforded (Z)-II-M as a yellow solid (30 mg, 84%). <sup>1</sup>H NMR (600 MHz, CDCl<sub>3</sub>) δ 7.80 (d, *J* = 2.0 Hz, 1H), 7.62 (d, *J* = 8.5 Hz, 1H), 7.33–7.17 (m, 4), 7.12 (dd, *J* = 8.2, 1.4 Hz, 2H), 5.50 (tt, *J* = 7.3, 1.5 Hz, 1H), 3.30 (t, *J* = 7.3 Hz, 2H), 2.46 (q, *J* = 7.3 Hz, 2H), 2.35 (q, *J* = 7.6 Hz, 2H), 0.97 (t, *J* = 7.4 Hz, 3H). <sup>13</sup>C NMR (150 MHz, CDCl<sub>3</sub>) δ 169.50, 154.25, 145.96, 141.04, 133.54, 132.14, 128.37, 128.24, 126.76, 124.52, 122.43, 121.59, 121.47, 33.86, 32.34, 28.57, 13.00. HRMS calcd. for C<sub>19</sub>H<sub>19</sub>ClNS<sub>2</sub><sup>+</sup> [M+H]<sup>+</sup>: 360.0642, Found: 360.0650.

CDCl<sub>3</sub>) δ 169.50, 154.25, 145.96, 141.04, 133.54, 132.14, 128.37, 128.24, 126.76, 124.52, 122.43, 121.59, 121.47, 33.86, 32.34, 28.57, 13.00. HRMS calcd. for C<sub>19</sub>H<sub>19</sub>ClNS<sub>2</sub><sup>+</sup> [M+H]<sup>+</sup>: 360.0642, Found: 360.0650.

**(Z)-6-ethoxy-2-((4-phenylhex-3-en-1-yl)thio)benzothiazole ((Z)-II-N):** The title compound was

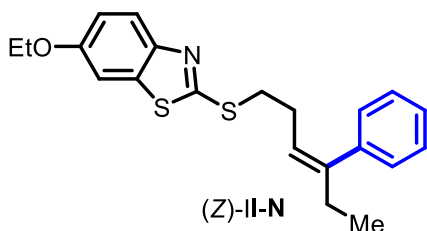

prepared according to General Procedure 5. The crude residue was purified by preparative TLC (5% Et<sub>2</sub>O/hexanes). Purification afforded (Z)-II-N as a yellow solid (30 mg, 82%). <sup>1</sup>H NMR (600 MHz, CDCl<sub>3</sub>) δ 7.74 (d, *J* = 8.9 Hz, 1H), 7.30 (t, *J* = 7.6 Hz, 2H), 7.23 (td, *J* = 6.2, 5.2, 2.0 Hz, 2H), 7.20–7.11 (m, 2H), 7.02 (dd, *J* = 8.9, 2.6 Hz, 1H), 5.53 (t, *J* = 7.4 Hz, 1H),

4.09 (q, *J* = 7.0 Hz, 2H), 3.30 (t, *J* = 7.3 Hz, 2H), 2.46 (q, *J* = 7.3 Hz, 2H), 2.37 (q, *J* = 6.8 Hz, 2H), 1.47 (t, *J* = 7.0 Hz, 3H), 0.98 (t, *J* = 7.4 Hz, 3H). <sup>13</sup>C NMR (150 MHz, CDCl<sub>3</sub>) δ 163.24, 155.82, 147.37, 145.06, 140.50, 136.05, 127.79, 127.62, 126.11, 122.06, 121.45, 114.68, 104.35, 63.66, 33.45, 31.71, 28.15, 14.39, 12.40. HRMS calcd. for C<sub>21</sub>H<sub>24</sub>NOS<sub>2</sub><sup>+</sup> [M+H]<sup>+</sup>: 370.1294, Found: 370.1295.

**(Z)-2-((4-phenylhex-3-en-1-yl)thio)-5-(trifluoromethoxy)benzothiazole ((Z)-II-O):** The title

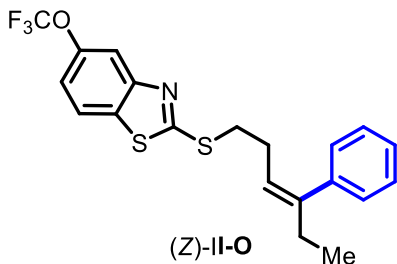

compound was prepared according to General Procedure 5. The crude residue was purified by preparative TLC (10% Et<sub>2</sub>O/hexanes). Purification afforded a 7:1 mixture of (Z)-2-((4-phenylhex-3-en-1-yl)thio)-5-(trifluoromethoxy)benzothiazole ((Z)-II-O) to

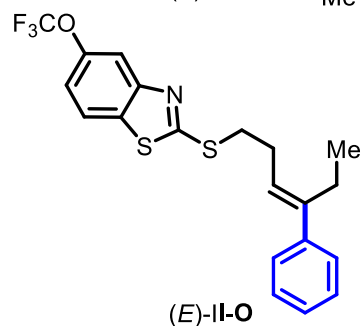

(E)-2-((4-phenylhex-3-en-1-yl)thio)-5-(trifluoromethoxy)benzothiazole ((E)-II-O) as a clear liquid (30 mg, 74%). In this case, it was possible to distinguish NMR peaks corresponding to each of the isomers, so their data are reported separately.

**(Z)-2-((4-phenylhex-3-en-1-yl)thio)-5-(trifluoromethoxy)benzothiazole ((Z)-II-O):** <sup>1</sup>H NMR (600 MHz, CDCl<sub>3</sub>) δ 7.70 (d, *J* = 8.7 Hz, 1H), 7.67 (d, *J* = 2.1 Hz, 1H), 7.38–7.05 (m, 6H), 5.50 (tt, *J* = 7.4, 1.5 Hz, 1H), 3.31 (t, *J* = 7.3 Hz, 2H), 2.47 (q, *J* = 7.3 Hz, 2H), 2.35 (q, *J* = 7.3 Hz, 3H), 0.97 (t, *J* = 7.4 Hz, 3H). <sup>13</sup>C NMR (150 MHz, CDCl<sub>3</sub>) δ 170.25, 154.06, 146.03, 141.05, 133.63, 128.37, 128.23,

170.25, 154.06, 146.03, 141.05, 133.63, 128.37, 128.23,

126.75, 122.40, 121.55, 117.63, 114.07, 33.84, 32.35, 28.56, 13.00.  $^{19}\text{F}$  NMR (376 MHz,  $\text{CDCl}_3$ )  $\delta$  -58.99. (*E*)-2-((4-phenylhex-3-en-1-yl)thio)-5-(trifluoromethoxy)benzothiazole ((*E*)-II-O):  $^1\text{H}$  NMR (600 MHz,  $\text{CDCl}_3$ )  $\delta$  7.78–7.67 (m, 2H), 7.37–7.12 (m, 6H), 5.68 (t,  $J = 7.3$  Hz, 1H), 3.47 (t,  $J = 7.4$  Hz, 2H), 2.76 (q,  $J = 7.4$  Hz, 2H), 2.56 (q,  $J = 7.5$  Hz, 2H), 1.00 (t,  $J = 7.5$  Hz, 3H).  $^{13}\text{C}$  NMR (150 MHz,  $\text{CDCl}_3$ )  $\delta$  170.15, 154.09, 147.99, 144.63, 142.57, 133.71, 128.37, 127.05, 126.52, 124.59, 121.67, 117.72, 114.10, 33.67, 28.49, 23.28, 13.75.  $^{19}\text{F}$  NMR (376 MHz,  $\text{CDCl}_3$ )  $\delta$  -58.99. HRMS calcd. for  $\text{C}_{20}\text{H}_{19}\text{F}_3\text{NOS}_2^+$   $[\text{M}+\text{H}]^+$ : 410.0855, Found: 410.0860.

(*E*)-1-phenyl-5-((4-phenylbut-3-en-1-yl)thio)-1H-tetrazole (VII-A): The title compound was

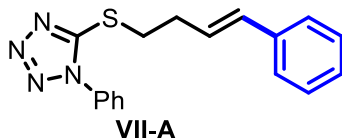

prepared with 2.50  $\mu\text{mol}$   $\text{Pd}(\text{OAc})_2$  according to General Procedure 3. The crude residue was purified by preparative TLC (5%  $\text{Et}_2\text{O}$ /hexanes). Purification afforded VII-A as a yellow liquid (18 mg, 76%).  $^1\text{H}$  NMR (600 MHz,  $\text{CDCl}_3$ )  $\delta$  7.60–7.51 (m, 5H), 7.37–7.28

(m, 4H), 7.24–7.19 (m, 1H), 6.48 (d,  $J = 15.8$  Hz, 1H), 6.21 (dt,  $J = 15.8, 7.0$  Hz, 1H), 3.55 (t,  $J = 7.1$  Hz, 2H), 2.76 (qd,  $J = 7.1, 1.5$  Hz, 2H).  $^{13}\text{C}$  NMR (150 MHz,  $\text{CDCl}_3$ )  $\delta$  153.79, 136.46, 133.21, 132.20, 129.65, 129.32, 128.11, 127.01, 126.15, 125.70, 123.42, 32.60, 32.13. HRMS calcd. for  $\text{C}_{17}\text{H}_{17}\text{N}_4\text{S}^+$   $[\text{M}+\text{H}]^+$ : 309.1168, Found: 309.1168.

(*E*)-2-((4-phenylbut-3-en-1-yl)thio)thiazolo[5,4-b]pyridine (VII-C): The title compound was

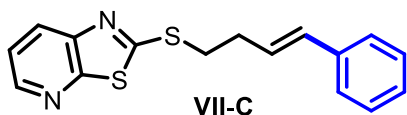

prepared with 2.50  $\mu\text{mol}$   $\text{Pd}(\text{OAc})_2$  according to General Procedure 3. The crude residue was purified by mass-directed prep LC. The crude material was purified on a Waters Autopurification LC with a Waters BEH C18 column (19 $\times$ 160

mm, 5 mm) using a 0.1% aqueous formic acid:acetonitrile gradient (30 mL/min, main segment of gradient at 65–95% acetonitrile over 8 min) at ambient temperature. Fractionation was triggered by a Waters QDa single quadrupole mass spec in ESI+ ( $m/z = 299.1$   $[\text{M}+\text{H}]$ , cone voltage 15V). Purification afforded VII-C as a yellow liquid (15 mg, 50%).  $^1\text{H}$  NMR (600 MHz,  $\text{CDCl}_3$ )  $\delta$  8.44 (dd,  $J = 4.7, 1.5$  Hz, 1H), 8.06 (dd,  $J = 8.2, 1.5$  Hz, 1H), 7.35 (dt,  $J = 8.3, 2.4$  Hz, 3H), 7.30 (t,  $J = 7.6$  Hz, 2H), 7.22 (t,  $J = 7.3$  Hz, 1H), 6.51 (d,  $J = 15.8$  Hz, 1H), 6.27 (dt,  $J = 15.7, 7.0$  Hz, 1H), 3.51 (t,  $J = 7.3$  Hz, 2H), 2.76 (q,  $J = 7.0$  Hz, 1H).  $^{13}\text{C}$  NMR (150 MHz,  $\text{CDCl}_3$ )  $\delta$  168.58, 158.88, 146.56, 145.73, 137.18, 132.49, 128.68, 127.99, 127.53, 127.23, 126.28, 121.24, 32.83, 32.70. HRMS calcd. for  $\text{C}_{16}\text{H}_{15}\text{N}_2\text{S}_2^+$   $[\text{M}+\text{H}]^+$ : 299.0671, Found: 299.0682.

(*E*)-5-chloro-2-((4-phenylbut-3-en-1-yl)thio)benzothiazole (VII-D): The title compound was

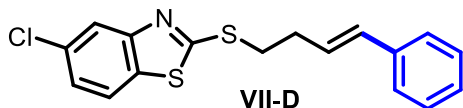

prepared with 2.50  $\mu\text{mol}$   $\text{Pd}(\text{OAc})_2$  according to General Procedure 3. The crude residue was purified by preparative TLC (5%  $\text{Et}_2\text{O}$ /hexanes). Purification afforded VII-D as a

yellow liquid (18 mg, 54%).  $^1\text{H}$  NMR (600 MHz,  $\text{CDCl}_3$ )  $\delta$  7.86 (d,  $J = 2.0$  Hz, 1H), 7.65 (d,  $J = 8.5$  Hz, 1H), 7.39–7.32 (m, 2H), 7.32–7.26 (m, 3H), 7.24–7.20 (m, 1H), 6.54–6.47 (m, 1H), 6.26 (dt,  $J = 15.8, 7.0$  Hz, 1H), 3.50 (t,  $J = 7.3$  Hz, 2H), 2.75 (qd,  $J = 7.2, 1.5$  Hz, 2H).  $^{13}\text{C}$  NMR (150 MHz,  $\text{CDCl}_3$ )  $\delta$  169.18, 154.26, 137.20, 133.61, 132.43, 132.23, 128.67, 127.51, 127.30, 126.28, 124.66,

124.64, 121.68, 121.66, 121.52, 33.38, 32.87. **HRMS** calcd. for  $C_{17}H_{15}ClNS_2^+$   $[M+H]^+$ : 332.0329, Found: 332.0335.

**(E)-6-ethoxy-2-((4-phenylbut-3-en-1-yl)thio)benzothiazole (VII-E):** The title compound was

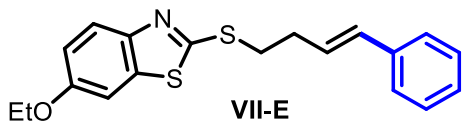

prepared with 2.50  $\mu$ mol  $Pd(OAc)_2$  according to General Procedure 3. The crude residue was purified by preparative TLC (5%  $Et_2O$ /hexanes). Purification afforded **VII-E** as a yellow liquid (15 mg, 44%).  **$^1H$  NMR** (600 MHz,  $CDCl_3$ )  $\delta$

7.76 (d,  $J = 8.9$  Hz, 1H), 7.37–7.32 (m, 2H), 7.29 (t,  $J = 7.7$  Hz, 2H), 7.22 (q,  $J = 3.0, 2.3$  Hz, 2H), 7.01 (dd,  $J = 8.9, 2.5$  Hz, 1H), 6.50 (d,  $J = 15.8$  Hz, 1H), 6.27 (dt,  $J = 15.8, 7.0$  Hz, 1H), 4.07 (q,  $J = 7.0$  Hz, 2H), 3.45 (t,  $J = 7.3$  Hz, 2H), 2.74 (qd,  $J = 7.2, 1.5$  Hz, 2H), 1.44 (t,  $J = 7.0$  Hz, 4H).  **$^{13}C$  NMR** (150 MHz,  $CDCl_3$ )  $\delta$  163.47, 156.52, 147.96, 137.30, 136.73, 132.24, 128.65, 127.56, 127.43, 126.28, 122.12, 115.40, 104.97, 64.26, 33.57, 33.02, 14.99. **HRMS** calcd. for  $C_{19}H_{20}NOS_2^+$   $[M+H]^+$ : 342.0981, Found: 342.0986.

**(E)-2-((4-phenylbut-3-en-1-yl)thio)benzothiazole (2a):** The title compound was prepared

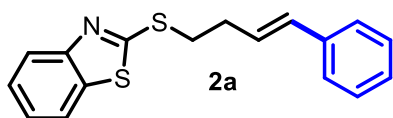

according to General Procedure 3. The crude residue was purified by preparative TLC (5%  $Et_2O$ /hexanes). Purification afforded **2a** as a yellow liquid (29 mg, >95%).  **$^1H$  NMR** (600 MHz,  $CDCl_3$ )  $\delta$

7.89 (d,  $J = 8.2$  Hz, 1H), 7.78–7.74 (m, 1H), 7.42 (t,  $J = 7.7$  Hz, 1H), 7.35 (d,  $J = 7.1$  Hz, 2H), 7.32–7.28 (m, 3H), 7.24–7.19 (m, 1H), 6.51 (d,  $J = 15.8$  Hz, 1H), 6.28 (dt,  $J = 15.8, 6.9$  Hz, 1H), 3.50 (t,  $J = 7.3$  Hz, 2H), 2.76 (qd,  $J = 7.2, 1.5$  Hz, 2H).  **$^{13}C$  NMR** (150 MHz,  $CDCl_3$ )  $\delta$  166.89, 153.44, 137.26, 135.36, 132.30, 128.65, 127.46, 127.45, 126.27, 126.14, 124.32, 121.62, 121.07, 33.35, 32.91. **HRMS** calcd. for  $C_{17}H_{16}NS_2^+$   $[M+H]^+$ : 298.0719, Found: 298.0726.

**(E)-2-((4-(p-tolyl)but-3-en-1-yl)thio)benzothiazole (2b):** The title compound was prepared

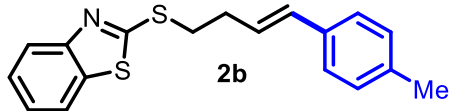

according to General Procedure 3. The crude residue was purified by mass-directed prep LC. The crude material was purified on a Waters Autopurification LC with a Waters BEH

C18 column (19 $\times$ 160 mm, 5 mm) using a 0.1% aqueous formic acid:acetonitrile gradient (30 mL/min, main segment of gradient at 65–95% acetonitrile over 8 min) at ambient temperature. Fractionation was triggered by a Waters QDa single quadrupole mass spec in ESI+ ( $m/z = 312.1$   $[M+H]$ , cone voltage 15V). Purification afforded **2b** as a clear liquid (30 mg, 97%).  **$^1H$  NMR** (600 MHz,  $CDCl_3$ )  $\delta$  7.88 (dt,  $J = 8.1, 0.9$  Hz, 1H), 7.76 (dt,  $J = 8.0, 0.6$  Hz, 1H), 7.42 (ddd,  $J = 8.3, 7.3, 1.3$  Hz, 1H), 7.30 (ddd,  $J = 8.2, 7.3, 1.2$  Hz, 1H), 7.24 (d,  $J = 8.0$  Hz, 2H), 7.10 (d,  $J = 7.9$  Hz, 2H), 6.47 (dt,  $J = 15.8, 1.5$  Hz, 1H), 6.22 (dt,  $J = 15.8, 7.0$  Hz, 1H), 3.49 (t,  $J = 7.3$  Hz, 2H), 2.74 (qd,  $J = 7.2, 1.5$  Hz, 2H), 2.33 (s, 3H).  **$^{13}C$  NMR** (150 MHz,  $CDCl_3$ )  $\delta$  166.98, 153.47, 137.23, 135.38, 134.49, 132.16, 129.36, 126.41, 126.18, 126.14, 124.30, 121.63, 121.08, 33.46, 32.92, 21.31. **HRMS** calcd. for  $C_{18}H_{18}NS_2$   $[M+H]^+$ : 312.0875, Found: 312.0875.

**(E)-2-((4-(4-butylphenyl)but-3-en-1-yl)thio)benzothiazole (2c):** The title compound was prepared according to General Procedure 3. The crude residue was purified by mass-directed prep LC. The crude material was purified on a Waters Autopurification LC with a Waters BEH C18 column (19×160 mm, 5 mm) using a

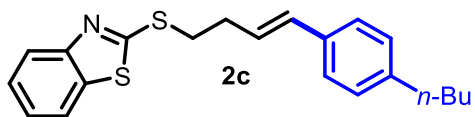

0.1% aqueous formic acid:acetonitrile gradient (30 mL/min, main segment of gradient at 65–95% acetonitrile over 8 min) at ambient temperature. Fractionation was triggered by a Waters QDa single quadrupole mass spec in ESI+ ( $m/z = 354.1$  [M+H], cone voltage 15V). Purification afforded **2b** as a yellow liquid (34 mg, >95%). <sup>1</sup>H NMR (600 MHz, CDCl<sub>3</sub>) δ 7.88 (d,  $J = 8.2$  Hz, 1H), 7.78–7.70 (m, 1H), 7.45–7.39 (m, 1H), 7.33–7.24 (m, 3H), 7.11 (d,  $J = 7.9$  Hz, 2H), 6.48 (d,  $J = 15.8$  Hz, 1H), 6.22 (dt,  $J = 15.7, 7.0$  Hz, 1H), 3.49 (t,  $J = 7.3$  Hz, 2H), 2.74 (qd,  $J = 7.1, 1.4$  Hz, 2H), 2.59 (t,  $J = 7.8$  Hz, 2H), 1.58 (tt,  $J = 9.9, 7.2$  Hz, 2H), 1.35 (h,  $J = 7.4$  Hz, 2H), 0.92 (t,  $J = 7.4$  Hz, 3H). <sup>13</sup>C NMR (150 MHz, CDCl<sub>3</sub>) δ 166.98, 153.46, 142.33, 135.37, 134.69, 132.21, 128.73, 126.43, 126.17, 126.13, 124.30, 121.63, 121.07, 35.48, 33.73, 33.48, 32.92, 22.46, 14.10. HRMS calcd. for C<sub>21</sub>H<sub>24</sub>NS<sub>2</sub><sup>+</sup> [M+H]<sup>+</sup>: 354.1350, Found: 354.1352.

**(E)-2-((4-(4-methoxyphenyl)but-3-en-1-yl)thio)benzothiazole (2d):** The title compound was prepared according to General Procedure 3. The crude residue was purified by mass-directed prep LC. The crude material was purified on a Waters Autopurification LC with a Waters BEH C18 column (19×160 mm, 5 mm) using a

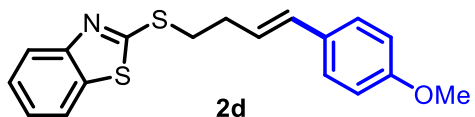

0.1% aqueous formic acid:acetonitrile gradient (30 mL/min, main segment of gradient at 65–95% acetonitrile over 8 min) at ambient temperature. Fractionation was triggered by a Waters QDa single quadrupole mass spec in ESI+ ( $m/z = 328.1$  [M+H], cone voltage 15V). Purification afforded **2d** as a yellow liquid (32 mg, >95%). <sup>1</sup>H NMR (600 MHz, CDCl<sub>3</sub>) δ 7.88 (dd,  $J = 8.2, 0.8$  Hz, 1H), 7.76 (dd,  $J = 7.9, 1.2$  Hz, 1H), 7.42 (ddd,  $J = 8.4, 7.3, 1.3$  Hz, 1H), 7.32–7.27 (m, 3H), 6.86–6.80 (m, 2H), 6.49–6.42 (m, 1H), 6.13 (dt,  $J = 15.8, 6.9$  Hz, 1H), 3.80 (s, 3H), 3.48 (t,  $J = 7.3$  Hz, 2H), 2.73 (qd,  $J = 7.2, 1.4$  Hz, 2H). <sup>13</sup>C NMR (150 MHz, CDCl<sub>3</sub>) δ 167.02, 159.15, 153.47, 135.38, 131.71, 130.11, 127.42, 126.15, 125.26, 124.31, 121.63, 121.11, 114.09, 55.43, 33.57, 32.93. HRMS calcd. for C<sub>18</sub>H<sub>18</sub>NOS<sub>2</sub> [M+H]<sup>+</sup>: 328.0824, Found: 328.0825.

**(E)-4-(4-(benzothiazol-2-ylthio)but-1-en-1-yl)phenol (2e):** The title compound was prepared

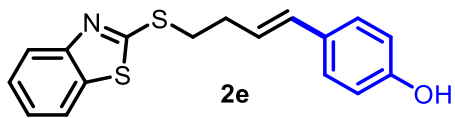

according to General Procedure 3. The crude residue was purified by preparative TLC (20% EtOAc/hexanes). Purification afforded **2e** as a yellow liquid (31 mg, >95%). <sup>1</sup>H NMR (600 MHz, CDCl<sub>3</sub>) δ 7.89 (d,  $J = 8.2$  Hz, 1H), 7.79–7.72 (m, 1H), 7.46–7.38 (m, 1H), 7.33–7.28 (m, 1H), 7.21 (d,  $J = 8.6$  Hz, 2H), 6.81–6.72 (m, 2H), 6.42 (d,  $J = 15.8$  Hz, 1H), 6.09 (dt,  $J = 15.8, 7.0$  Hz, 1H), 5.38 (s, 1H), 3.48 (t,  $J = 7.3$  Hz, 2H), 2.72 (qd,  $J = 7.2, 1.4$  Hz, 2H). <sup>13</sup>C NMR (150 MHz, CDCl<sub>3</sub>) δ 167.65, 155.45, 153.24, 135.18, 131.79, 130.01, 127.64, 126.31, 124.95, 124.46, 121.52, 121.12, 115.66, 33.69, 32.80. HRMS calcd. for C<sub>17</sub>H<sub>16</sub>NOS<sub>2</sub><sup>+</sup> [M+H]<sup>+</sup>: 314.0668, Found: 314.0669.

**(E)-4-(4-(benzothiazol-2-ylthio)but-1-en-1-yl)benzaldehyde (2f):** The title compound was

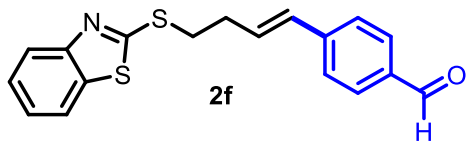

prepared according to General Procedure 3. The crude residue was purified by mass-directed prep LC. The crude material was purified on a Waters Autopurification LC with a Waters BEH C18 column (19×160 mm, 5 mm) using a 0.1% aqueous formic acid:acetonitrile gradient (30 mL/min, main segment of gradient at 65–95% acetonitrile over 8 min) at ambient temperature. Fractionation was triggered by a Waters QDa single quadrupole mass spec in ESI+ ( $m/z = 326.1$  [M+H], cone voltage 15V). Purification afforded **2f** as a clear liquid (32 mg, >95%).  $^1\text{H NMR}$  (600 MHz,  $\text{CDCl}_3$ )  $\delta$  9.96 (s, 1H), 7.90–7.85 (m, 1H), 7.80 (d,  $J = 8.2$  Hz, 2H), 7.75 (dd,  $J = 8.1, 1.2$  Hz, 1H), 7.47 (d,  $J = 8.1$  Hz, 2H), 7.42 (ddd,  $J = 8.4, 7.3, 1.3$  Hz, 1H), 7.30 (td,  $J = 7.7, 7.3, 1.2$  Hz, 1H), 6.56 (d,  $J = 15.9$  Hz, 1H), 6.46 (dt,  $J = 15.8, 6.9$  Hz, 1H), 3.53 (t,  $J = 7.2$  Hz, 2H), 2.81 (qd,  $J = 7.1, 1.3$  Hz, 2H).  $^{13}\text{C NMR}$  (150 MHz,  $\text{CDCl}_3$ )  $\delta$  191.82, 166.55, 153.38, 143.31, 135.38, 135.35, 131.55, 131.37, 130.25, 126.75, 126.21, 124.43, 121.63, 121.12, 33.11, 32.95. **HRMS** calcd. for  $\text{C}_{18}\text{H}_{16}\text{NOS}_2^+$  [M+H] $^+$ : 326.0668, Found: 326.0670.

**(E)-2-((4-(3-isopropylphenyl)but-3-en-1-yl)thio)benzothiazole (2g):** The title compound was

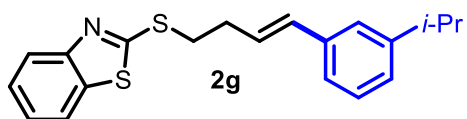

prepared according to General Procedure 3. The crude residue was purified by preparative TLC (5%  $\text{Et}_2\text{O}$ /hexanes). Purification afforded **2g** as a clear liquid (34 mg, >95%) with 8% inseparable isomer.  $^1\text{H NMR}$  (600 MHz,  $\text{CDCl}_3$ )  $\delta$  7.89 (d,  $J = 8.2$  Hz, 1H), 7.76 (dd,  $J = 8.0, 1.1$  Hz, 1H), 7.42 (ddd,  $J = 8.3, 7.2, 1.3$  Hz, 1H), 7.32–7.27 (m, 1H), 7.26–7.15 (m, 3H), 7.10 (dt,  $J = 7.5, 1.6$  Hz, 1H), 6.51 (d,  $J = 15.8$  Hz, 1H), 6.27 (dt,  $J = 15.8, 7.0$  Hz, 1H), 3.50 (t,  $J = 7.3$  Hz, 2H), 2.88 (p,  $J = 6.9$  Hz, 1H), 2.76 (qd,  $J = 7.2, 1.4$  Hz, 2H), 1.25 (d,  $J = 6.9$  Hz, 6H).  $^{13}\text{C NMR}$  (150 MHz,  $\text{CDCl}_3$ )  $\delta$  166.96, 153.46, 149.23, 137.22, 135.37, 132.58, 128.65, 127.16, 126.14, 125.67, 124.49, 124.31, 123.81, 121.63, 121.08, 34.24, 33.39, 32.96, 24.12. **HRMS** calcd. for  $\text{C}_{20}\text{H}_{22}\text{NS}_2^+$  [M+H] $^+$ : 340.1188, Found: 312.0875.

**(E)-2-((4-(benzo[d][1,3]dioxol-5-yl)but-3-en-1-yl)thio)benzothiazole (2h):** The title compound

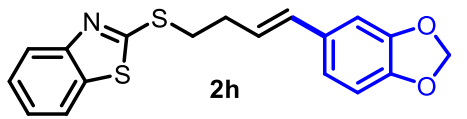

was prepared according to General Procedure 3. The crude residue was purified by preparative TLC (10%  $\text{Et}_2\text{O}$ /hexanes). Purification afforded **2h** as a yellow liquid (25 mg, 72%).  $^1\text{H NMR}$  (600 MHz,  $\text{CDCl}_3$ )  $\delta$  7.88 (d,  $J = 8.1$  Hz, 1H), 7.75 (d,  $J = 8.0$  Hz, 1H), 7.48–7.37 (m, 1H), 7.29 (t,  $J = 7.6$  Hz, 1H), 6.89 (d,  $J = 1.6$  Hz, 1H), 6.83–6.66 (m, 2H), 6.41 (d,  $J = 15.7$  Hz, 1H), 6.09 (dt,  $J = 15.7, 7.0$  Hz, 1H), 5.94 (s, 2H), 3.48 (t,  $J = 7.3$  Hz, 2H), 2.72 (qd,  $J = 7.2, 1.4$  Hz, 2H).  $^{13}\text{C NMR}$  (150 MHz,  $\text{CDCl}_3$ )  $\delta$  166.36, 152.85, 147.51, 146.52, 134.77, 131.30, 131.19, 125.57, 125.11, 123.73, 121.03, 120.49, 120.21, 107.78, 105.07, 100.54, 32.88, 32.24. **HRMS** calcd. for  $\text{C}_{18}\text{H}_{16}\text{NO}_2\text{S}_2^+$  [M+H] $^+$ : 342.0619, Found: 342.0617.

**(E)-2-((4-(4-(trifluoromethyl)phenyl)but-3-en-1-yl)thio)benzothiazole (2i):** The title compound

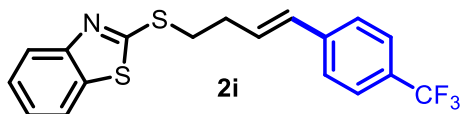

was prepared according to General Procedure 3. The crude residue was purified by mass-directed prep LC. The crude material was purified on a Waters Autopurification LC with a Waters BEH C18 column (19×160 mm, 5 mm) using a 0.1% aqueous formic acid:acetonitrile gradient (30 mL/min, main segment of gradient at 65–95% acetonitrile over 8 min) at ambient temperature. Fractionation was triggered by a Waters QDa single quadrupole mass spec in ESI+ ( $m/z = 366.1$  [M+H]), cone voltage 15V). Purification afforded **2i** as a clear liquid (20 mg, 55%). **<sup>1</sup>H NMR** (600 MHz, CDCl<sub>3</sub>) δ 7.91–7.85 (m, 1H), 7.75 (dd,  $J = 8.0$ , 1.2 Hz, 1H), 7.53 (d,  $J = 8.1$  Hz, 2H), 7.42 (ddd,  $J = 8.5$ , 7.3, 1.3 Hz, 3H), 7.30 (ddd,  $J = 8.2$ , 7.3, 1.2 Hz, 1H), 6.53 (d,  $J = 15.9$  Hz, 1H), 6.38 (dt,  $J = 15.9$ , 7.0 Hz, 1H), 3.52 (t,  $J = 7.2$  Hz, 2H), 2.79 (qd,  $J = 7.1$ , 1.4 Hz, 2H). **<sup>13</sup>C NMR** (150 MHz, CDCl<sub>3</sub>) δ 166.62, 153.40, 140.72, 135.40, 131.07, 130.37, 126.41, 126.21, 125.64, 125.61, 125.59, 125.56, 124.43, 121.64, 121.12, 33.06, 33.01. **<sup>19</sup>F NMR** (376 MHz, CDCl<sub>3</sub>) δ -63.47. **HRMS** calcd. for C<sub>18</sub>H<sub>15</sub>F<sub>3</sub>NS<sub>2</sub> [M+H]<sup>+</sup>: 366.0593, Found: 366.0604.

**(E)-2-((4-(naphthalen-2-yl)but-3-en-1-yl)thio)benzothiazole (2j):** The title compound was

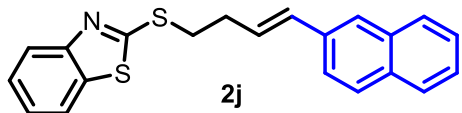

prepared according to General Procedure 3. The crude residue was purified by mass-directed prep LC. The crude material was purified on a Waters Autopurification LC with a Waters BEH C18 column (19×160 mm, 5 mm) using a 0.1% aqueous formic acid:acetonitrile gradient (30 mL/min, main segment of gradient at 65–95% acetonitrile over 8 min) at ambient temperature. Fractionation was triggered by a Waters QDa single quadrupole mass spec in ESI+ ( $m/z = 348.1$  [M+H]), cone voltage 15V). Purification afforded **2j** as a yellow solid (34 mg, >95%). **<sup>1</sup>H NMR** (600 MHz, CDCl<sub>3</sub>) δ 7.90 (d,  $J = 8.1$  Hz, 1H), 7.82–7.73 (m, 4H), 7.69 (d,  $J = 1.7$  Hz, 1H), 7.57 (dd,  $J = 8.5$ , 1.7 Hz, 1H), 7.49–7.40 (m, 3H), 7.33–7.28 (m, 1H), 6.67 (d,  $J = 15.8$  Hz, 1H), 6.41 (dt,  $J = 15.8$ , 7.0 Hz, 1H), 3.54 (t,  $J = 7.3$  Hz, 2H), 2.82 (qd,  $J = 7.2$ , 1.5 Hz, 2H). **<sup>13</sup>C NMR** (150 MHz, CDCl<sub>3</sub>) δ 166.91, 153.46, 135.40, 134.74, 133.75, 133.00, 132.43, 128.28, 128.05, 127.94, 127.77, 126.34, 126.17, 126.02, 125.85, 124.35, 123.62, 121.65, 121.11, 33.39, 33.10. **HRMS** calcd. for C<sub>21</sub>H<sub>18</sub>NS<sub>2</sub><sup>+</sup> [M+H]<sup>+</sup>: 348.0875, Found: 348.0877.

**(E)-2-((4-(1-methyl-1H-indol-5-yl)but-3-en-1-yl)thio)benzothiazole (2k):** The title compound

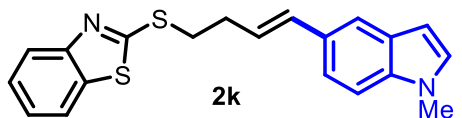

was prepared according to General Procedure 3. The crude residue was purified by mass-directed prep LC. The crude material was purified on a Waters Autopurification LC with a Waters BEH C18 column (19×160 mm, 5 mm) using a 0.1% aqueous formic acid:acetonitrile gradient (30 mL/min, main segment of gradient at 65–95% acetonitrile over 8 min) at ambient temperature. Fractionation was triggered by a Waters QDa single quadrupole mass spec in ESI+ ( $m/z = 351.1$  [M+H]), cone voltage 15V). Purification afforded **2k** as a red solid (56 mg, 80%) as a 10:1 mixture of isomers. **<sup>1</sup>H NMR** (600 MHz, CDCl<sub>3</sub>) δ 7.89 (d,  $J = 8.1$  Hz, 1H), 7.76 (dd,  $J = 8.0$ , 1.2 Hz, 1H), 7.57 (d,  $J = 1.6$  Hz, 1H), 7.45–7.40 (m, 1H), 7.32–7.28

(m, 2H), 7.24 (d,  $J = 8.5$  Hz, 1H), 7.02 (d,  $J = 3.2$  Hz, 1H), 6.62 (d,  $J = 15.7$  Hz, 1H), 6.44 (d,  $J = 3.1$  Hz, 1H), 6.21 (dt,  $J = 15.7, 7.0$  Hz, 1H), 3.78 (s, 3H), 3.51 (t,  $J = 7.3$  Hz, 2H), 2.76 (qd,  $J = 7.1, 1.4$  Hz, 2H).  $^{13}\text{C}$  NMR (150 MHz,  $\text{CDCl}_3$ )  $\delta$  167.24, 153.52, 136.48, 135.39, 133.41, 129.39, 128.93, 128.80, 126.14, 124.39, 124.28, 121.65, 121.08, 120.03, 119.18, 109.41, 101.34, 33.77, 33.06, 33.05. HRMS calcd. for  $\text{C}_{20}\text{H}_{18}\text{N}_2\text{S}_2$   $[\text{M}+\text{H}]^+$ : 351.0984, Found: 351.0991.

**(E)-2-((4-(6-fluoropyridin-3-yl)but-3-en-1-yl)thio)benzothiazole (2l):** The title compound was

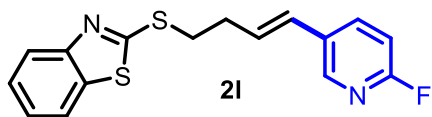

prepared according to General Procedure 3. The crude residue was purified by mass-directed prep LC. The crude material was purified on a Waters Autopurification LC with a Waters BEH C18 column (19×160 mm, 5 mm) using a 0.1% aqueous formic

acid:acetonitrile gradient (30 mL/min, main segment of gradient at 65–95% acetonitrile over 8 min) at ambient temperature. Fractionation was triggered by a Waters QDa single quadrupole mass spec in ESI+ ( $m/z = 317.1$   $[\text{M}+\text{H}]$ , cone voltage 15V). Purification afforded **2l** as a clear liquid (20 mg, 65%) as a 25:2 mixture of isomers.  $^1\text{H}$  NMR (600 MHz,  $\text{CDCl}_3$ )  $\delta$  8.12 (d,  $J = 2.5$  Hz, 1H), 7.87 (d,  $J = 8.2$  Hz, 1H), 7.75 (dd,  $J = 8.0, 2.9$  Hz, 2H), 7.42 (t,  $J = 7.6$  Hz, 1H), 7.30 (t,  $J = 7.6$  Hz, 1H), 6.84 (dd,  $J = 8.5, 3.0$  Hz, 1H), 6.46 (d,  $J = 16.0$  Hz, 1H), 6.26 (dt,  $J = 15.9, 6.9$  Hz, 1H), 3.51 (t,  $J = 7.1$  Hz, 2H), 2.77 (q,  $J = 7.1$  Hz, 2H).  $^{13}\text{C}$  NMR (150 MHz,  $\text{CDCl}_3$ )  $\delta$  166.53, 163.67, 162.09, 153.36, 145.73, 145.64, 137.90, 137.85, 135.36, 129.81, 129.80, 127.39, 126.21, 124.44, 121.62, 121.12, 109.60, 109.35, 33.01.  $^{19}\text{F}$  NMR (376 MHz,  $\text{CDCl}_3$ )  $\delta$  -70.93. HRMS calcd. for  $\text{C}_{16}\text{H}_{14}\text{FN}_2\text{S}_2^+$   $[\text{M}+\text{H}]^+$ : 317.0577, Found: 317.0574.

**(E)-4-(4-(benzothiazol-2-ylthio)but-1-en-1-yl)-3,5-dimethylisoxazole (2m):** The title compound

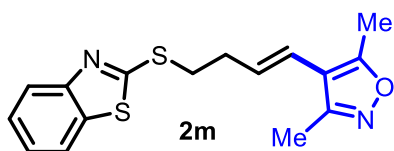

was prepared according to General Procedure 3. The crude residue was purified by mass-directed prep LC. The crude material was purified on a Waters Autopurification LC with a Waters BEH C18 column (19×160 mm, 5 mm) using a 0.1% aqueous formic

acid:acetonitrile gradient (30 mL/min, main segment of gradient at 65–95% acetonitrile over 8 min) at ambient temperature. Fractionation was triggered by a Waters QDa single quadrupole mass spec in ESI+ ( $m/z = 317.1$   $[\text{M}+\text{H}]$ , cone voltage 15V). Purification afforded **2m** as a white solid (16 mg, 49%).  $^1\text{H}$  NMR (600 MHz,  $\text{CDCl}_3$ )  $\delta$  7.87 (d,  $J = 8.1$  Hz, 1H), 7.76 (d,  $J = 8.0$  Hz, 1H), 7.42 (t,  $J = 7.7$  Hz, 1H), 7.30 (t,  $J = 7.6$  Hz, 1H), 6.15 (d,  $J = 16.1$  Hz, 1H), 5.91 (dt,  $J = 16.0, 6.9$  Hz, 1H), 3.50 (t,  $J = 7.1$  Hz, 2H), 2.73 (q,  $J = 7.1$  Hz, 2H), 2.37 (s, 3H), 2.27 (s, 3H).  $^{13}\text{C}$  NMR (150 MHz,  $\text{CDCl}_3$ )  $\delta$  166.67, 165.26, 158.38, 153.37, 135.36, 129.16, 126.23, 124.45, 121.61, 121.13, 120.21, 112.67, 33.52, 33.29, 11.79, 11.53. HRMS calcd. for  $\text{C}_{16}\text{H}_{17}\text{N}_2\text{OS}_2^+$   $[\text{M}+\text{H}]^+$ : 317.0777, Found: 317.0777.

**(E)-2-((4-(1-(phenylsulfonyl)-1H-indol-2-yl)but-3-en-1-yl)thio)benzothiazole (2n):** The title

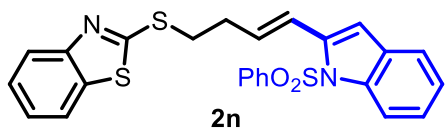

compound was prepared according to General Procedure 3. The crude residue was purified by mass-directed prep LC. The crude material was purified on a Waters Autopurification LC with a Waters BEH C18 column (19×160 mm, 5 mm) using a



0.1% aqueous formic acid:acetonitrile gradient (30 mL/min, main segment of gradient at 65–95% acetonitrile over 8 min) at ambient temperature. Fractionation was triggered by a Waters QDa single quadrupole mass spec in ESI+ ( $m/z = 477.1$  [M+H], cone voltage 15V). Purification afforded **2n** as an orange solid (17 mg, 35%).  $^1\text{H NMR}$  (600 MHz,  $\text{CDCl}_3$ )  $\delta$  8.19 (d,  $J = 8.4$  Hz, 1H), 7.91 (d,  $J = 8.1$  Hz, 1H), 7.77 (dt,  $J = 8.6, 1.6$  Hz, 3H), 7.51–7.45 (m, 1H), 7.47–7.40 (m, 1H), 7.37 (t,  $J = 7.9$  Hz, 3H), 7.33–7.27 (m, 2H), 7.23–7.15 (m, 2H), 6.58 (s, 1H), 6.20 (dt,  $J = 15.7, 7.0$  Hz, 1H), 3.55 (t,  $J = 7.1$  Hz, 2H), 2.83 (qd,  $J = 7.1, 1.5$  Hz, 2H).  $^{13}\text{C NMR}$  (150 MHz,  $\text{CDCl}_3$ )  $\delta$  166.60, 153.43, 139.22, 138.58, 137.30, 135.41, 133.82, 132.21, 130.08, 129.17, 126.80, 126.25, 124.76, 124.45, 124.07, 122.96, 121.70, 121.17, 120.70, 115.23, 108.79, 33.12, 32.95. **HRMS** calcd. for  $\text{C}_{25}\text{H}_{21}\text{N}_2\text{O}_2\text{S}_3^+$  [M+H] $^+$ : 477.0760, Found: 477.0765.

**(E)-2-((4-(furan-2-yl)but-3-en-1-yl)thio)benzothiazole (2o)** and **(E)-2-((4-(furan-2-yl)but-3-en-1-yl)thio)benzothiazole (2o')**: The title compound was prepared according to General Procedure 3.

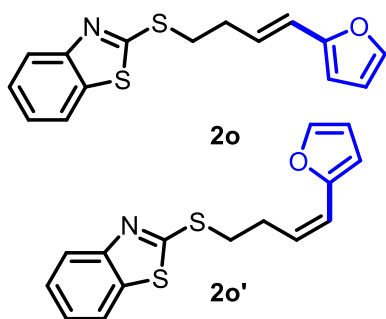

The crude residue was purified by mass-directed prep LC. The crude material was purified on a Waters Autopurification LC with a Waters BEH C18 column (19×160 mm, 5 mm) using a 0.1% aqueous formic acid:acetonitrile gradient (30 mL/min, main segment of gradient at 65–95% acetonitrile over 8 min) at ambient temperature. Fractionation was triggered by a Waters QDa single quadrupole mass spec in ESI+ ( $m/z = 288.1$  [M+H], cone voltage 15V). Purification afforded **2o** and **2o'** as an orange liquid (6 mg,

21%) in a 6:1 ratio of *E* and *Z* isomers (**2o:2o'**). In this case, it was possible to distinguish NMR peaks corresponding to each of the isomers, so their data are reported separately. **(E)-2-((4-(furan-2-yl)but-3-en-1-yl)thio)benzothiazole**:  $^1\text{H NMR}$  (600 MHz,  $\text{CDCl}_3$ )  $\delta$  7.88 (d,  $J = 8.1$  Hz, 1H), 7.76 (d,  $J = 8.0$  Hz, 1H), 7.42 (t,  $J = 7.6$  Hz, 1H), 7.35–7.28 (m, 2H), 6.44–6.13 (m, 4H), 3.47 (t,  $J = 7.3$  Hz, 2H), 2.73 (q,  $J = 7.1$  Hz, 2H).  $^{13}\text{C NMR}$  (150 MHz,  $\text{CDCl}_3$ )  $\delta$  166.82, 153.46, 152.74, 141.84, 135.39, 126.33, 126.16, 124.34, 121.66, 121.09, 120.83, 111.33, 107.28, 33.24, 32.70. **(Z)-2-((4-(furan-2-yl)but-3-en-1-yl)thio)benzothiazole**:  $^1\text{H NMR}$  (600 MHz,  $\text{CDCl}_3$ )  $\delta$  7.88 (d,  $J = 8.1$  Hz, 1H), 7.76 (d,  $J = 8.0$  Hz, 1H), 7.42 (t,  $J = 7.6$  Hz, 1H), 7.35–7.28 (m, 2H), 6.44–6.13 (m, 4H), 3.48 (t,  $J = 7.3$  Hz, 2H), 3.03 (qd,  $J = 7.4, 1.7$  Hz, 2H).  $^{13}\text{C NMR}$  (150 MHz,  $\text{CDCl}_3$ )  $\delta$  166.82, 153.46, 152.93, 141.93, 135.39, 126.93, 126.16, 124.33, 121.64, 121.09, 119.31, 111.26, 109.94, 33.24, 32.70. **HRMS** calcd. for  $\text{C}_{15}\text{H}_{14}\text{NOS}_2^+$  [M+H] $^+$ : 288.0511, Found: 288.0513.

**2-(3E,5E)-7-phenylhepta-3,5-dien-1-ylthio)benzothiazole (2p)**: The title compound was

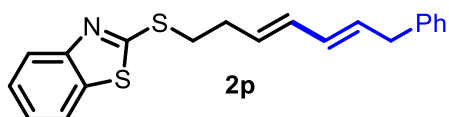

prepared according to General Procedure 3. The crude residue was purified by mass-directed prep LC. The crude material was purified on a Waters Autopurification LC with a Waters BEH C18 column (19×160 mm, 5 mm) using a 0.1% aqueous

formic acid:acetonitrile gradient (30 mL/min, main segment of gradient at 65–95% acetonitrile over 8 min) at ambient temperature. Fractionation was triggered by a Waters QDa single quadrupole mass spec in ESI+ ( $m/z = 338.1$  [M+H], cone voltage 15V). Purification afforded **2p** as a yellow solid (13

mg, 38%).  $^1\text{H NMR}$  (600 MHz,  $\text{CDCl}_3$ )  $\delta$  7.86 (d,  $J = 8.1$  Hz, 1H), 7.75 (d,  $J = 8.0$  Hz, 1H), 7.41 (t,  $J = 7.7$  Hz, 1H), 7.29 (t,  $J = 7.4$  Hz, 3H), 7.22–7.16 (m, 3H), 6.15 (dd,  $J = 15.1, 10.3$  Hz, 1H), 6.07 (dd,  $J = 15.0, 10.4$  Hz, 1H), 5.79 (dt,  $J = 14.5, 7.0$  Hz, 1H), 5.66 (dt,  $J = 14.6, 7.0$  Hz, 1H), 3.40 (t,  $J = 7.6$  Hz, 4H), 2.60 (q,  $J = 7.2$  Hz, 2H).  $^{13}\text{C NMR}$  (150 MHz,  $\text{CDCl}_3$ )  $\delta$  166.99, 153.46, 140.34, 135.36, 132.52, 132.30, 131.13, 129.58, 128.74, 128.59, 126.24, 126.15, 124.31, 121.64, 121.08, 39.12, 33.37, 32.47. **HRMS** calcd. for  $\text{C}_{20}\text{H}_{20}\text{NS}_2^+$   $[\text{M}+\text{H}]^+$ : 338.1032, Found: 338.1032.

**2-(3Z,5Z)-7-phenylhepta-3,5-dien-1-ylthio)benzothiazole (2p')**: The reaction was carried out

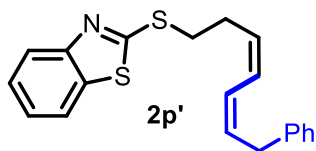

according to General Procedure 3. The crude residue was purified by mass-directed prep LC. The crude material was purified on a Waters Autopurification LC with a Waters BEH C18 column (19×160 mm, 5 mm) using a 0.1% aqueous formic acid:acetonitrile gradient (30 mL/min,

main segment of gradient at 65–95% acetonitrile over 8 min) at ambient temperature. Fractionation was triggered by a Waters QDa single quadrupole mass spec in ESI+ ( $m/z = 338.1$   $[\text{M}+\text{H}]$ , cone voltage 15V). Purification afforded **2p'** as a yellow solid (9 mg, 26%).  $^1\text{H NMR}$  (600 MHz,  $\text{CDCl}_3$ )  $\delta$  7.88 (d,  $J = 8.1$  Hz, 1H), 7.76 (d,  $J = 9.0$  Hz, 1H), 7.44–7.38 (m, 1H), 7.29 (q,  $J = 7.6$  Hz, 3H), 7.21–7.16 (m, 3H), 6.40 (ddd,  $J = 14.9, 10.9, 1.5$  Hz, 1H), 6.11 (t,  $J = 10.9$  Hz, 1H), 5.86 (dt,  $J = 14.6, 7.1$  Hz, 1H), 5.44 (dt,  $J = 10.7, 7.6$  Hz, 1H), 3.43 (d,  $J = 7.2$  Hz, 2H), 3.40 (t,  $J = 7.4$  Hz, 2H), 2.73 (qd,  $J = 7.5, 1.4$  Hz, 2H).  $^{13}\text{C NMR}$  (150 MHz,  $\text{CDCl}_3$ )  $\delta$  166.94, 153.46, 140.24, 135.38, 134.30, 130.90, 128.67, 128.60, 127.02, 126.58, 126.27, 126.16, 124.33, 121.62, 121.10, 39.41, 33.42, 27.74. **HRMS** calcd. for  $\text{C}_{20}\text{H}_{20}\text{NS}_2^+$   $[\text{M}+\text{H}]^+$ : 338.1032, Found: 338.1034.

**(E)-2-((5-phenylpent-4-en-2-yl)thio)benzothiazole (4a)**: The title compound was prepared

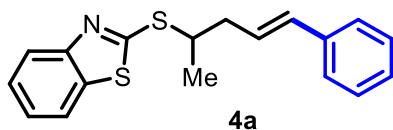

according to General Procedure 3. The crude residue was purified by preparative TLC (5%  $\text{Et}_2\text{O}$ /hexanes). Purification afforded **4a** as a yellow liquid (30 mg, >95%).  $^1\text{H NMR}$  (600 MHz,  $\text{CDCl}_3$ )  $\delta$  7.90 (d,  $J = 8.1$  Hz, 1H), 7.78–7.68 (m, 1H), 7.46–7.39 (m, 1H),

7.35 (d,  $J = 7.3$  Hz, 2H), 7.32–7.28 (m, 3H), 7.23–7.19 (m, 1H), 6.50 (d,  $J = 15.7$  Hz, 1H), 6.28 (dt,  $J = 15.8, 7.3$  Hz, 1H), 4.16 (p,  $J = 6.8$  Hz, 1H), 2.90–2.70 (m, 1H), 2.65 (dtd,  $J = 14.4, 7.3, 1.3$  Hz, 1H), 1.55 (d,  $J = 6.9$  Hz, 3H).  $^{13}\text{C NMR}$  (150 MHz,  $\text{CDCl}_3$ )  $\delta$  166.33, 153.54, 137.31, 135.48, 133.21, 128.65, 127.44, 126.33, 126.31, 126.13, 124.41, 121.76, 121.07, 44.19, 40.35, 20.84. **HRMS** calcd. for  $\text{C}_{18}\text{H}_{18}\text{NS}_2$   $[\text{M}+\text{H}]^+$ : 312.0876, Found: 312.0876.

**(E)-2-((2-methyl-4-phenylbut-3-en-1-yl)thio)benzothiazole (4b)**: The title compound was

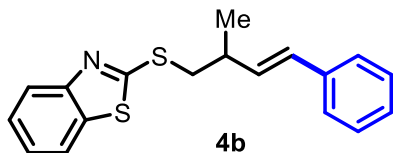

prepared according to General Procedure 3. The crude residue was purified by mass-directed prep LC. The crude material was purified on a Waters Autopurification LC with a Waters BEH C18 column (19×160 mm, 5 mm) using a 0.1% aqueous formic acid:acetonitrile

gradient (30 mL/min, main segment of gradient at 65–95% acetonitrile over 8 min) at ambient temperature. Fractionation was triggered by a Waters QDa single quadrupole mass spec in ESI+ ( $m/z = 312.1$   $[\text{M}+\text{H}]$ , cone voltage 15V). Purification afforded **4b** as a yellow liquid (30 mg, >95%).

**<sup>1</sup>H NMR** (600 MHz, CDCl<sub>3</sub>) δ 7.88 (d, *J* = 8.1 Hz, 1H), 7.77–7.71 (m, 1H), 7.44–7.39 (m, 1H), 7.34 (d, *J* = 7.1 Hz, 2H), 7.29 (td, *J* = 7.4, 2.3 Hz, 3H), 7.23–7.19 (m, 1H), 6.48 (d, *J* = 15.8 Hz, 1H), 6.19 (dd, *J* = 15.8, 7.7 Hz, 1H), 3.46 (qd, *J* = 12.8, 6.9 Hz, 2H), 2.86 (p, *J* = 7.0 Hz, 1H), 1.30 (d, *J* = 6.8 Hz, 3H). **<sup>13</sup>C NMR** (150 MHz, CDCl<sub>3</sub>) δ 167.33, 153.43, 137.30, 135.37, 133.35, 130.29, 128.75, 128.64, 127.43, 126.34, 126.13, 124.30, 121.59, 121.07, 40.32, 37.39, 19.99. **HRMS** calcd. for C<sub>18</sub>H<sub>18</sub>NS<sub>2</sub><sup>+</sup> [M+H]<sup>+</sup>: 312.0875, Found: 312.0876.

**(*E*)-1-(benzothiazol-2-ylthio)-4-phenylbut-3-en-2-ol (4c):** The title compound was prepared according to General Procedure 3. The crude residue was purified by preparative TLC (20% EtOAc/hexanes). Purification afforded **4c** as a yellow liquid (14 mg, 63%). **<sup>1</sup>H NMR** (600 MHz, CDCl<sub>3</sub>) δ 7.88 (d, *J* = 8.1 Hz, 1H), 7.75 (d, *J* = 8.0 Hz, 1H), 7.44 (t, *J* = 7.7 Hz, 1H), 7.40 (d, *J* = 7.6 Hz, 2H), 7.32 (q, *J* = 7.2 Hz, 3H), 7.24 (d, *J* = 7.4 Hz, 1H), 6.76 (d, *J* = 15.8 Hz, 1H), 6.32 (dd, *J* = 15.8, 5.9 Hz, 1H), 4.77 (d, *J* = 31.4 Hz, 2H), 3.67 (dd, *J* = 14.4, 3.3 Hz, 1H), 3.51 (dd, *J* = 14.4, 7.2 Hz, 1H). **<sup>13</sup>C NMR** (150 MHz, CDCl<sub>3</sub>) δ 167.88, 152.53, 136.62, 135.64, 131.45, 130.17, 128.71, 127.93, 126.74, 126.43, 124.81, 121.50, 121.23, 72.30, 41.10. **HRMS** calcd. for C<sub>17</sub>H<sub>16</sub>NOS<sub>2</sub><sup>+</sup> [M+H]<sup>+</sup>: 314.0668, Found: 314.0668.

**(*E*)-2-((3-methyl-4-phenylbut-3-en-1-yl)thio)benzothiazole (4d):** The title compound was prepared according to General Procedure 3. The crude residue was purified by mass-directed prep LC. The crude material was purified on a Waters Autopurification LC with a Waters BEH C18 column (19×160 mm, 5 mm) using a 0.1% aqueous formic acid:acetonitrile gradient (30 mL/min, main segment of gradient at 65–95% acetonitrile over 8 min) at ambient temperature. Fractionation was triggered by a Waters QDa single quadrupole mass spec in ESI+ (*m/z* = 312.1 [M+H], cone voltage 15V). Purification afforded **4d** as a yellow liquid (21 mg, 68%). **<sup>1</sup>H NMR** (600 MHz, CDCl<sub>3</sub>) δ 7.89 (d, *J* = 8.2 Hz, 1H), 7.76 (d, *J* = 7.9 Hz, 1H), 7.46–7.39 (m, 1H), 7.31 (dt, *J* = 12.6, 7.6 Hz, 3H), 7.24 (d, *J* = 7.6 Hz, 2H), 7.21 (t, *J* = 7.6 Hz, 1H), 6.40 (s, 1H), 3.57 (t, *J* = 7.6 Hz, 2H), 2.70 (t, *J* = 7.6 Hz, 2H), 1.95 (s, 3H). **<sup>13</sup>C NMR** (150 MHz, CDCl<sub>3</sub>) δ 167.08, 153.47, 138.05, 136.17, 135.38, 128.99, 128.22, 127.37, 126.39, 126.16, 124.32, 121.63, 121.10, 40.21, 32.33, 17.75. **HRMS** calcd. for C<sub>18</sub>H<sub>18</sub>NS<sub>2</sub><sup>+</sup> [M+H]<sup>+</sup>: 312.0875, Found: 312.0876.

**2-(1*S*,2*S*,5*R*)-5-methyl-2-((*E*)-1-phenylprop-1-en-2-yl)cyclohexylthio)benzothiazole (4e):** The title compound was prepared from **3e** according to General Procedure 3. The crude residue was purified by mass-directed prep LC. The crude material was purified on a Waters Autopurification LC with a Waters BEH C18 column (19×160 mm, 5 mm) using a 0.1% aqueous formic acid:acetonitrile gradient (30 mL/min, main segment of gradient at 65–95% acetonitrile over 8 min) at ambient temperature. Fractionation was triggered by a Waters QDa single quadrupole mass spec in ESI+ (*m/z* = 380.2 [M+H], cone voltage 15V). Purification afforded **4e** as a yellow

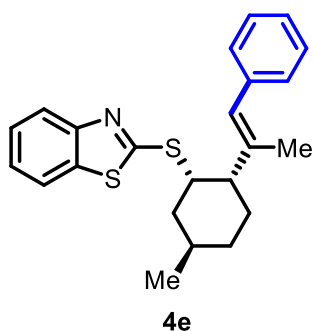

liquid (38 mg, >95%) as a 10:1 mixture of isomers.  $^1\text{H NMR}$  (600 MHz,  $\text{CDCl}_3$ )  $\delta$  7.84 (d,  $J = 8.1$  Hz, 1H), 7.70 (d,  $J = 8.0$  Hz, 1H), 7.40 (t,  $J = 7.6$  Hz, 1H), 7.27 (d,  $J = 7.9$  Hz, 1H), 7.18 (t,  $J = 7.6$  Hz, 2H), 7.11 (t,  $J = 7.5$  Hz, 1H), 7.03 (d,  $J = 7.5$  Hz, 2H), 6.28 (s, 1H), 4.85 (d,  $J = 3.7$  Hz, 1H), 2.47 (dd,  $J = 12.2, 3.4$  Hz, 1H), 2.34 (dd,  $J = 13.5, 3.1$  Hz, 1H), 1.90 (s, 3H), 1.88–1.72 (m, 4H), 1.71–1.55 (m, 2H), 1.10 (qd,  $J = 12.6, 3.7$  Hz, 1H), 0.95 (d,  $J = 6.5$  Hz, 3H).  $^{13}\text{C NMR}$  (150 MHz,  $\text{CDCl}_3$ )  $\delta$  167.59, 153.39, 139.69, 138.49, 135.42, 129.11, 127.94, 126.03, 126.01, 125.50, 124.18, 121.44, 121.00, 50.65, 49.47, 41.43, 35.06, 28.21, 26.61, 22.23, 18.45. **HRMS** calcd. for  $\text{C}_{23}\text{H}_{26}\text{NS}_2^+$   $[\text{M}+\text{H}]^+$ : 380.1501, Found: 380.1509.

**(E)-2-((4-(4-methoxyphenyl)hex-3-en-1-yl)thio)benzothiazole (4f)**: The title compound was

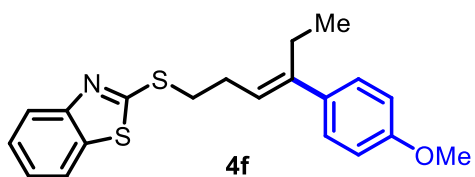

prepared according to General Procedure 4. The crude residue was purified by preparative TLC (10%  $\text{Et}_2\text{O}$ /hexanes). Purification afforded **4f** as a clear liquid (31 mg, 86%).  $^1\text{H NMR}$  (600 MHz,  $\text{CDCl}_3$ )  $\delta$  7.88 (d,  $J = 8.1$  Hz, 1H), 7.76 (dd,  $J = 8.0, 1.1$  Hz, 1H), 7.45–7.38 (m, 1H), 7.32–7.27 (m, 3H), 6.84 (d,  $J = 8.7$  Hz, 2H), 5.63 (t,  $J = 7.3$  Hz, 1H), 3.81 (s, 3H), 3.45 (t,  $J = 7.4$  Hz, 2H), 2.74 (q,  $J = 7.4$  Hz, 2H), 2.53 (q,  $J = 7.5$  Hz, 2H), 0.99 (t,  $J = 7.5$  Hz, 3H).  $^{13}\text{C NMR}$  (150 MHz,  $\text{CDCl}_3$ )  $\delta$  167.14, 158.79, 153.49, 143.77, 135.39, 135.04, 127.52, 126.15, 124.29, 123.36, 121.60, 121.09, 113.72, 55.41, 33.74, 28.56, 23.24, 13.78. **HRMS** calcd. for  $\text{C}_{20}\text{H}_{22}\text{NOS}_2^+$   $[\text{M}+\text{H}]^+$ : 356.1137, Found: 356.1150.

**(E)-2-((4-(4-(trifluoromethyl)phenyl)hex-3-en-1-yl)thio)benzothiazole (4g)**: The title compound was

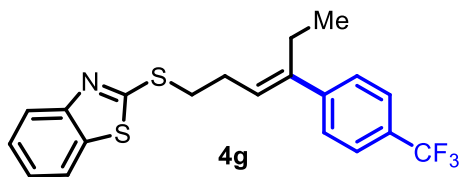

prepared according to General Procedure 4. The crude residue was purified by preparative TLC (10%  $\text{EtOAc}$ /hexanes). Purification afforded **4g** as a clear liquid (20 mg, 50%).  $^1\text{H NMR}$  (600 MHz,  $\text{CDCl}_3$ )  $\delta$  7.87 (d,  $J = 8.1$  Hz, 1H), 7.79–7.72 (m, 1H), 7.53 (d,  $J = 8.1$  Hz, 2H), 7.42 (td,  $J = 8.3, 1.7$  Hz, 3H), 7.35–7.29 (m, 1H), 5.75 (t,  $J = 7.3$  Hz, 1H), 3.48 (t,  $J = 7.3$  Hz, 2H), 2.78 (q,  $J = 7.3$  Hz, 2H), 2.57 (q,  $J = 7.6$  Hz, 2H), 0.98 (t,  $J = 7.5$  Hz, 3H).  $^{13}\text{C NMR}$  (150 MHz,  $\text{CDCl}_3$ )  $\delta$  166.81, 153.43, 146.25, 143.44, 135.40, 126.81, 126.79, 126.21, 125.34, 125.31, 125.29, 125.26, 124.40, 121.61, 121.14, 33.40, 28.65, 23.18, 13.60.  $^{19}\text{F NMR}$  (376 MHz,  $\text{CDCl}_3$ )  $\delta$  -63.36. **HRMS** calcd. for  $\text{C}_{20}\text{H}_{19}\text{F}_3\text{NS}_2^+$   $[\text{M}+\text{H}]^+$ : 394.0906, Found: 394.0929.

**(E)-2-((4-(4-(trifluoromethyl)phenyl)hex-2-en-1-yl)thio)benzothiazole (4g')**: The title

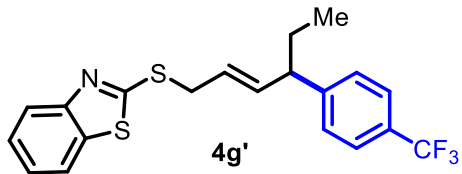

compound was prepared according to General Procedure 4. The crude residue was purified by preparative TLC (10%  $\text{EtOAc}$ /hexanes). Purification afforded **4g'** as a clear liquid (6 mg, 15%).  $^1\text{H NMR}$  (600 MHz,  $\text{CDCl}_3$ )  $\delta$  7.87 (d,  $J = 8.1$  Hz, 1H), 7.76 (d,  $J = 7.9$  Hz, 1H), 7.44 (td,  $J = 8.1, 1.7$  Hz, 3H), 7.33 (t,  $J = 7.6$  Hz, 1H), 7.20 (d,  $J = 7.9$  Hz, 2H), 5.91 (dd,  $J = 15.2, 7.8$  Hz, 1H), 5.69 (dt,  $J = 14.8, 7.1$  Hz, 1H), 3.98 (d,  $J = 7.1$  Hz, 2H), 3.22 (q,  $J = 7.5$  Hz, 1H), 1.72 (dtd,  $J = 17.3, 13.8, 7.0$  Hz,

2H), 0.83 (t,  $J = 7.4$  Hz, 3H).  $^{13}\text{C}$  NMR (150 MHz,  $\text{CDCl}_3$ )  $\delta$  165.97, 153.32, 148.27, 138.24, 135.52, 127.96, 126.21, 125.46, 125.44, 125.41, 125.39, 124.63, 124.51, 121.76, 121.10, 50.20, 35.99, 28.50, 12.11, 0.15.  $^{19}\text{F}$  NMR (376 MHz,  $\text{CDCl}_3$ )  $\delta$  -63.29. HRMS calcd. for  $\text{C}_{20}\text{H}_{19}\text{F}_3\text{NS}_2^+$   $[\text{M}+\text{H}]^+$ : 394.0906, Found: 394.0917.

**(Z)-2-((4-phenylhept-3-en-1-yl)thio)benzothiazole (4h):** The title compound was prepared

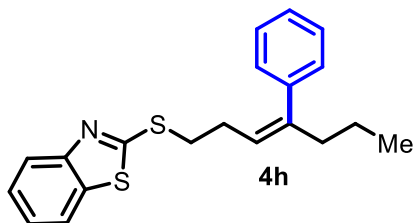

according to General Procedure 5. The crude residue was purified by preparative TLC (5%  $\text{Et}_2\text{O}$ /hexanes). Purification afforded **4h** as a white solid (31 mg, 90%).  $^1\text{H}$  NMR (600 MHz,  $\text{CDCl}_3$ )  $\delta$  7.85 (d,  $J = 8.2$  Hz, 1H), 7.73 (d,  $J = 7.9$  Hz, 1H), 7.40 (t,  $J = 7.4$  Hz, 1H), 7.31–7.26 (m, 3H), 7.20 (t,  $J = 7.4$  Hz, 1H), 7.12 (d,  $J = 7.1$  Hz, 2H), 5.52 (t,  $J = 7.3$  Hz, 1H), 3.31 (t,  $J = 7.3$  Hz, 2H),

2.46 (q,  $J = 7.3$  Hz, 2H), 2.31 (t,  $J = 7.6$  Hz, 2H), 1.32 (q,  $J = 7.4$  Hz, 2H), 0.86 (t,  $J = 7.3$  Hz, 3H).  $^{13}\text{C}$  NMR (150 MHz,  $\text{CDCl}_3$ )  $\delta$  167.27, 153.47, 144.08, 140.96, 135.33, 128.40, 128.22, 126.72, 126.09, 124.21, 123.90, 121.59, 121.01, 41.60, 33.88, 28.67, 21.15, 13.75. HRMS calcd. for  $\text{C}_{20}\text{H}_{22}\text{NS}_2^+$   $[\text{M}+\text{H}]^+$ : 340.1188, Found: 340.1204.

**(Z)-2-((4-phenyloct-3-en-1-yl)thio)benzothiazole (4i):** The title compound was prepared

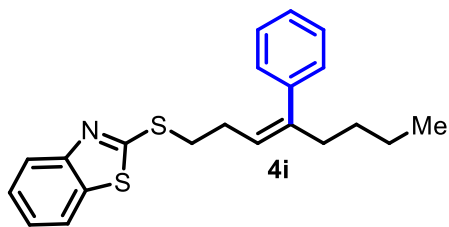

according to General Procedure 5. The crude residue was purified by preparative TLC (5%  $\text{Et}_2\text{O}$ /hexanes). Purification afforded **4i** as a clear liquid (32 mg, 91%).  $^1\text{H}$  NMR (600 MHz,  $\text{CDCl}_3$ )  $\delta$  7.83 (d,  $J = 8.1$  Hz, 1H), 7.73 (d,  $J = 7.9$  Hz, 1H), 7.40 (t,  $J = 8.1$  Hz, 1H), 7.31–7.25 (m, 3H), 7.20 (t,  $J = 7.4$  Hz, 1H), 7.13 (d,  $J = 7.0$  Hz, 2H), 5.52 (t,  $J = 7.3$  Hz, 1H),

3.32 (t,  $J = 7.3$  Hz, 2H), 2.46 (q,  $J = 7.3$  Hz, 2H), 2.39–2.27 (m, 2H), 1.27 (dt,  $J = 8.1, 3.9$  Hz, 4H), 0.88–0.80 (m, 3H).  $^{13}\text{C}$  NMR (150 MHz,  $\text{CDCl}_3$ )  $\delta$  167.27, 153.46, 144.33, 141.02, 135.32, 128.40, 128.22, 126.71, 126.09, 124.21, 123.65, 121.59, 121.01, 39.23, 33.88, 30.27, 28.70, 22.40, 14.06. HRMS calcd. for  $\text{C}_{21}\text{H}_{24}\text{NS}_2^+$   $[\text{M}+\text{H}]^+$ : 354.1345, Found: 354.1356.

**(Z)-2-((4-phenylnon-3-en-1-yl)thio)benzothiazole (4j):** The title compound was prepared

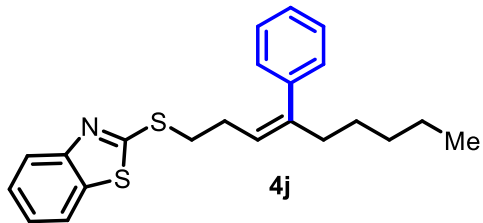

according to General Procedure 5. The crude residue was purified by preparative TLC (5%  $\text{Et}_2\text{O}$ /hexanes). Purification afforded **4j** as a white solid (31 mg, 85%).  $^1\text{H}$  NMR (600 MHz,  $\text{CDCl}_3$ )  $\delta$  7.84 (d,  $J = 8.1$  Hz, 1H), 7.73 (d,  $J = 7.9$  Hz, 1H), 7.40 (t,  $J = 7.7$  Hz, 1H), 7.28 (td,  $J = 8.1, 3.6$  Hz, 3H), 7.20 (t,  $J = 7.4$  Hz, 1H), 7.13 (d,  $J = 7.4$

Hz, 2H), 5.52 (t,  $J = 7.3$  Hz, 1H), 3.32 (t,  $J = 7.3$  Hz, 2H), 2.46 (q,  $J = 7.3$  Hz, 2H), 2.32 (t,  $J = 7.3$  Hz, 2H), 1.30 (t,  $J = 6.7$  Hz, 1H), 1.26–1.22 (m, 4H), 0.90–0.65 (m, 3H).  $^{13}\text{C}$  NMR (150 MHz,  $\text{CDCl}_3$ )  $\delta$  167.29, 153.45, 144.36, 141.02, 135.31, 128.39, 128.21, 126.70, 126.09, 124.21, 123.64, 121.59, 121.00, 39.48, 33.89, 31.53, 28.68, 27.74, 22.61, 14.21. HRMS calcd. for  $\text{C}_{22}\text{H}_{26}\text{NS}_2^+$   $[\text{M}+\text{H}]^+$ : 368.1501, Found: 368.1519.

**(Z)-7-(benzothiazol-2-ylthio)-4-phenylhept-4-en-1-yl benzoate (4k):** The reaction was carried out according to General Procedure 5. The crude residue was purified by mass-directed prep LC. The crude material was purified on a Waters Autopurification LC with a Waters BEH C18 column (19×160 mm, 5 mm) using a 0.1% aqueous formic acid:acetonitrile gradient (30 mL/min, main segment of gradient at 65–95% acetonitrile

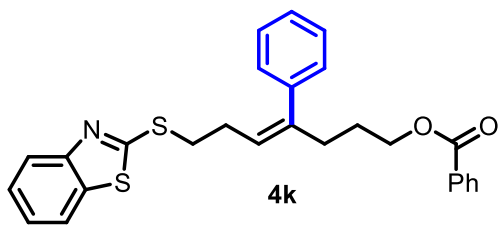

over 8 min) at ambient temperature. Fractionation was triggered by a Waters QDa single quadrupole mass spec in ESI+ ( $m/z = 460.1[M+H]$ , cone voltage 15V). Purification afforded **4k** as a yellow liquid (28 mg, 61%). <sup>1</sup>H NMR (600 MHz, CDCl<sub>3</sub>) δ 8.02 (d,  $J = 7.7$  Hz, 2H), 7.82 (d,  $J = 8.2$  Hz, 1H), 7.72 (d,  $J = 7.9$  Hz, 1H), 7.55 (t,  $J = 7.4$  Hz, 1H), 7.44 (t,  $J = 7.7$  Hz, 2H), 7.39 (t,  $J = 7.6$  Hz, 1H), 7.29 (t,  $J = 7.5$  Hz, 3H), 7.22 (t,  $J = 7.5$  Hz, 1H), 7.15 (d,  $J = 7.4$  Hz, 2H), 5.59 (t,  $J = 7.3$  Hz, 1H), 4.29 (t,  $J = 6.6$  Hz, 2H), 3.32 (t,  $J = 7.3$  Hz, 2H), 2.50 (dq,  $J = 14.6, 7.4$  Hz, 4H), 1.78 (p,  $J = 6.8$  Hz, 2H). <sup>13</sup>C NMR (150 MHz, CDCl<sub>3</sub>) δ 167.07, 166.71, 153.41, 142.74, 140.25, 135.31, 132.98, 130.53, 129.68, 128.47, 128.47, 128.41, 127.02, 126.09, 124.86, 124.23, 121.58, 121.01, 64.46, 35.81, 33.69, 28.70, 27.16. HRMS calcd. for C<sub>27</sub>H<sub>26</sub>NO<sub>2</sub>S<sub>2</sub><sup>+</sup> [M+H]<sup>+</sup>: 460.1400, Found: 460.1409.

**(Z)-2-(6-(benzothiazol-2-ylthio)-3-phenylhex-3-en-1-yl)isoindoline-1,3-dione (4l):** The title compound was prepared according to General Procedure 5. The crude residue was purified by mass-directed prep LC. The crude material was purified on a Waters Autopurification LC with a Waters BEH C18 column (19×160 mm, 5 mm) using a 0.1% aqueous formic acid:acetonitrile gradient (30 mL/min, main segment of gradient at 65–95% acetonitrile over 8 min) at ambient temperature. Fractionation was triggered by a Waters QDa single quadrupole mass spec in ESI+ ( $m/z = 471.1 [M+H]$ , cone voltage 15V). Purification afforded **4l** as a yellow liquid (28 mg, 60%). <sup>1</sup>H NMR (600 MHz, CDCl<sub>3</sub>) δ 7.84–7.76 (m, 3H), 7.72 (d,  $J = 7.9$  Hz, 1H), 7.65 (dd,  $J = 5.5, 3.1$  Hz, 2H), 7.39 (t,  $J = 7.7$  Hz, 1H), 7.26 (dd,  $J = 24.2, 7.5$  Hz, 3H), 7.19 (d,  $J = 7.6$  Hz, 2H), 7.15 (t,  $J = 7.4$  Hz, 1H), 5.55 (t,  $J = 7.4$  Hz, 1H), 3.72 (t,  $J = 6.9$  Hz, 2H), 3.22 (t,  $J = 7.3$  Hz, 2H), 2.77 (t,  $J = 7.0$  Hz, 2H), 2.45 (q,  $J = 7.3$  Hz, 2H). <sup>13</sup>C NMR (150 MHz, CDCl<sub>3</sub>) δ 168.45, 166.90, 153.39, 140.24, 139.48, 135.29, 133.94, 132.18, 128.57, 128.34, 127.11, 126.82, 126.09, 124.23, 123.24, 121.59, 121.01, 37.64, 37.24, 33.51, 28.57. HRMS calcd. for C<sub>27</sub>H<sub>23</sub>N<sub>2</sub>O<sub>2</sub>S<sub>2</sub><sup>+</sup> [M+H]<sup>+</sup>: 471.1196, Found: 471.1191.

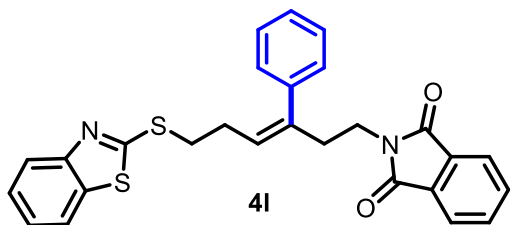

gradient at 65–95% acetonitrile over 8 min) at ambient temperature. Fractionation was triggered by a Waters QDa single quadrupole mass spec in ESI+ ( $m/z = 471.1 [M+H]$ , cone voltage 15V). Purification afforded **4l** as a yellow liquid (28 mg, 60%). <sup>1</sup>H NMR (600 MHz, CDCl<sub>3</sub>) δ 7.84–7.76 (m, 3H), 7.72 (d,  $J = 7.9$  Hz, 1H), 7.65 (dd,  $J = 5.5, 3.1$  Hz, 2H), 7.39 (t,  $J = 7.7$  Hz, 1H), 7.26 (dd,  $J = 24.2, 7.5$  Hz, 3H), 7.19 (d,  $J = 7.6$  Hz, 2H), 7.15 (t,  $J = 7.4$  Hz, 1H), 5.55 (t,  $J = 7.4$  Hz, 1H), 3.72 (t,  $J = 6.9$  Hz, 2H), 3.22 (t,  $J = 7.3$  Hz, 2H), 2.77 (t,  $J = 7.0$  Hz, 2H), 2.45 (q,  $J = 7.3$  Hz, 2H). <sup>13</sup>C NMR (150 MHz, CDCl<sub>3</sub>) δ 168.45, 166.90, 153.39, 140.24, 139.48, 135.29, 133.94, 132.18, 128.57, 128.34, 127.11, 126.82, 126.09, 124.23, 123.24, 121.59, 121.01, 37.64, 37.24, 33.51, 28.57. HRMS calcd. for C<sub>27</sub>H<sub>23</sub>N<sub>2</sub>O<sub>2</sub>S<sub>2</sub><sup>+</sup> [M+H]<sup>+</sup>: 471.1196, Found: 471.1191.

**(Z)-6-(benzothiazol-2-ylthio)-3-phenylhex-3-en-1-ol (4m):** The title compound was prepared according to General Procedure 5. The crude residue was purified by mass-directed prep LC. The crude material was purified on a Waters Autopurification LC with a Waters BEH C18 column (19×160 mm, 5 mm) using a 0.1% aqueous formic acid:acetonitrile gradient (30 mL/min, main segment of gradient at 55–75% acetonitrile over 8 min) at ambient temperature.

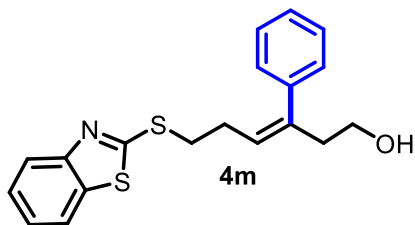

Fractionation was triggered by a Waters QDa single quadrupole mass spec in ESI+ ( $m/z = 342.1$  [M+H], cone voltage 15V). Purification afforded **4m** as a yellow liquid (18 mg, 53%). **<sup>1</sup>H NMR** (600 MHz, CDCl<sub>3</sub>)  $\delta$  7.83 (d,  $J = 8.1$  Hz, 1H), 7.73 (d,  $J = 7.9$  Hz, 1H), 7.45–7.38 (m, 1H), 7.33–7.26 (m, 4H), 7.21 (t,  $J = 7.4$  Hz, 1H), 7.18–7.10 (m, 2H), 5.64 (t,  $J = 7.3$  Hz, 1H), 3.57 (t,  $J = 6.3$  Hz, 2H), 3.34 (t,  $J = 7.2$  Hz, 2H), 2.62 (t,  $J = 6.3$  Hz, 2H), 2.51 (q,  $J = 7.2$  Hz, 2H). **<sup>13</sup>C NMR** (150 MHz, CDCl<sub>3</sub>)  $\delta$  166.88, 153.38, 140.45, 139.81, 135.31, 128.47, 128.37, 127.16, 127.03, 126.13, 124.30, 121.62, 121.04, 60.52, 42.59, 33.61, 28.66. **HRMS** calcd. for C<sub>19</sub>H<sub>20</sub>NOS<sub>2</sub><sup>+</sup> [M+H]<sup>+</sup>: 342.0981, Found: 342.0997.

**(E)-2-((5-phenylpent-4-en-1-yl)thio)benzothiazole (4n)**: The title compound was prepared

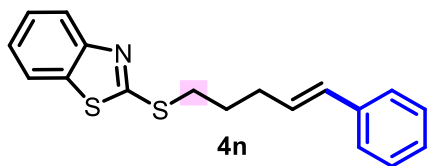

according to General Procedure 3. The crude residue was purified by mass-directed prep LC. The crude material was purified on a Waters Autopurification LC with a Waters BEH C18 column (19×160 mm, 5 mm) using a 0.1% aqueous formic acid:acetonitrile gradient (30 mL/min, main segment of gradient

at 65–95% acetonitrile over 8 min) at ambient temperature. Fractionation was triggered by a Waters QDa single quadrupole mass spec in ESI+ ( $m/z = 312.1$  [M+H], cone voltage 15V). Purification afforded **4n** as a white solid (29 mg, 94%). **<sup>1</sup>H NMR** (600 MHz, CDCl<sub>3</sub>)  $\delta$  7.87 (d,  $J = 8.1$  Hz, 1H), 7.78–7.70 (m, 1H), 7.46–7.38 (m, 1H), 7.35 (d,  $J = 7.2$  Hz, 2H), 7.32–7.28 (m, 3H), 7.21 (t,  $J = 7.3$  Hz, 1H), 6.45 (d,  $J = 15.8$  Hz, 1H), 6.22 (dt,  $J = 15.8, 6.9$  Hz, 1H), 3.41 (t,  $J = 7.2$  Hz, 2H), 2.42 (qd,  $J = 7.1, 1.5$  Hz, 2H), 2.03 (p,  $J = 7.3$  Hz, 2H). **<sup>13</sup>C NMR** (150 MHz, CDCl<sub>3</sub>)  $\delta$  167.13, 153.47, 137.62, 135.35, 131.25, 129.15, 128.65, 127.21, 126.15, 124.30, 121.64, 121.07, 33.06, 32.01, 29.03. **HRMS** calcd. for C<sub>18</sub>H<sub>18</sub>NS<sub>2</sub> [M+H]<sup>+</sup>: 312.0875, Found: 312.0874.

**(E)-2-((6-phenylhex-5-en-1-yl)thio)benzothiazole (4o)**: The title compound was prepared

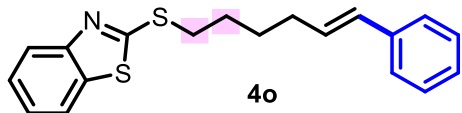

according to General Procedure 3. The crude residue was purified by preparative TLC (5% Et<sub>2</sub>O/hexanes). Purification afforded **4o** as a yellow liquid (18 mg, 54%). **<sup>1</sup>H NMR** (600

MHz, CDCl<sub>3</sub>)  $\delta$  7.86 (d,  $J = 8.1$  Hz, 1H), 7.75 (d,  $J = 7.9$  Hz, 1H), 7.41 (t,  $J = 8.1$  Hz, 1H), 7.35–7.27 (m, 5H), 7.22–7.16 (m, 1H), 6.40 (d,  $J = 15.8$  Hz, 1H), 6.21 (dt,  $J = 15.8, 6.9$  Hz, 1H), 3.39 (t,  $J = 7.3$  Hz, 2H), 2.29 (qd,  $J = 7.2, 1.5$  Hz, 2H), 1.90 (p,  $J = 7.5$  Hz, 2H), 1.68 (p,  $J = 7.5$  Hz, 2H). **<sup>13</sup>C NMR** (150 MHz, CDCl<sub>3</sub>)  $\delta$  167.32, 153.48, 137.80, 135.33, 130.56, 130.23, 128.63, 127.06, 126.14, 126.10, 124.27, 121.62, 121.06, 33.57, 32.55, 28.90, 28.52. **HRMS** calcd. for C<sub>19</sub>H<sub>20</sub>NS<sub>2</sub><sup>+</sup> [M+H]<sup>+</sup>: 326.1032, Found: 326.1046.

**(E)-2-((3,4-dimethyl-4-phenylpent-2-en-1-yl)thio)benzothiazole (4p)** and **2-((4-methyl-3-methylene-4-phenylpentyl)thio)benzothiazole (4q)**: The title compound was prepared according

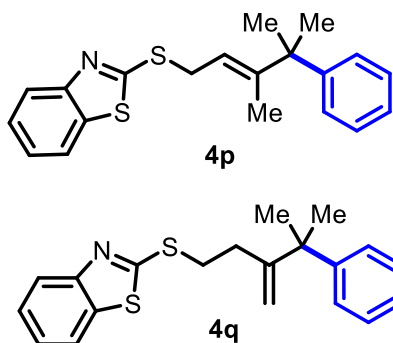

to General Procedure 5. The crude residue was purified by mass-directed prep LC. The crude material was purified on a Waters Autopurification LC with a Waters BEH C18 column (19×160 mm, 5 mm) using a 0.1% aqueous formic acid:acetonitrile gradient (30 mL/min, main segment of gradient at 65–95% acetonitrile over 8 min) at ambient temperature. Fractionation was triggered by a Waters QDa single quadrupole mass spec in ESI+ ( $m/z = 340.1$  [M+H], cone voltage 15V). Purification afforded a 5:2 mixture of **4p** and **4q** as a yellow liquid (8 mg, 12%). In this case,

it was possible to distinguish NMR peaks corresponding to each of the isomers, so their data are reported separately. **<sup>1</sup>H NMR** (600 MHz, CDCl<sub>3</sub>) (**4p**):  $\delta$  7.87 (d,  $J = 8.2$  Hz, 1H), 7.77 (d,  $J = 8.0$  Hz, 1H), 7.40 (m,  $J = 7.5$  Hz, 1H), 7.29–7.06 (m, 6H),  $\delta$  5.75 (t,  $J = 7.8$  Hz, 1H), 4.08 (d,  $J = 7.7$  Hz, 2H), 1.55 (s, 3H), 1.39 (s, 6H); (**4q**):  $\delta$  7.82 (d,  $J = 8.2$  Hz, 1H), 7.72 (d,  $J = 8.0$  Hz, 1H), 7.40 (m,  $J = 7.5$  Hz, 1H), 7.29–7.06 (m, 6H), 5.29 (s, 1H), 5.11 (s, 1H), 3.31 (t,  $J = 7.7$  Hz, 2H), 2.30 (t,  $J = 8.0$  Hz, 2H), 1.46 (s, 1H). **<sup>13</sup>C NMR** (150 MHz, CDCl<sub>3</sub>) **4p**:  $\delta$  166.96, 153.51, 148.70, 148.19, 135.55, 128.25, 126.23, 126.17, 125.87, 124.35, 121.73, 121.09, 116.85, 45.03, 32.33, 28.29, 14.66; **4q**:  $\delta$  167.21, 154.68, 153.45, 147.71, 135.31, 128.35, 126.33, 126.07, 126.07, 124.19, 121.59, 121.01, 109.63, 44.56, 33.13, 32.26, 28.48. **HRMS** calcd. for C<sub>20</sub>H<sub>22</sub>NS<sub>2</sub><sup>+</sup> [M+H]<sup>+</sup>: 340.1188, Found: 340.1189.

**(E)-2-((3,4-dimethyl-5-phenylpent-4-en-1-yl)thio)benzothiazole (4r)**: The title compound was

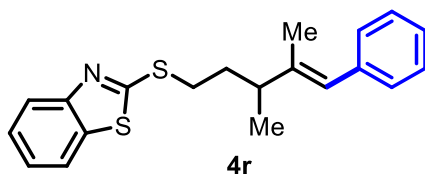

prepared according to General Procedure 5. The crude residue was purified by mass-directed prep LC. The crude material was purified on a Waters Autopurification LC with a Waters BEH C18 column (19×160 mm, 5 mm) using a 0.1% aqueous formic acid:acetonitrile gradient (30 mL/min, main segment of gradient

at 65–95% acetonitrile over 8 min) at ambient temperature. Fractionation was triggered by a Waters QDa single quadrupole mass spec in ESI+ ( $m/z = 340.1$  [M+H], cone voltage 15V). Purification afforded **4r** as a yellow liquid (3 mg, 5%). **<sup>1</sup>H NMR** (600 MHz, CDCl<sub>3</sub>)  $\delta$  7.85 (d,  $J = 8.0$  Hz, 1H), 7.75 (d,  $J = 8.0$  Hz, 1H), 7.40 (ddd,  $J = 8.3, 7.1, 1.3$  Hz, 1H), 7.34–7.15 (m, 6H), 6.38 (s, 1H), 3.39 (ddd,  $J = 13.0, 9.1, 5.4$  Hz, 1H), 3.25 (ddd,  $J = 13.1, 9.1, 6.8$  Hz, 1H), 2.63–2.47 (m, 1H), 2.08–1.97 (m, 1H), 1.90 (dddd,  $J = 14.1, 9.1, 6.8, 5.5$  Hz, 1H), 1.83 (d,  $J = 1.4$  Hz, 3H), 1.16 (d,  $J = 6.8$  Hz, 3H). **<sup>13</sup>C NMR** (150 MHz, CDCl<sub>3</sub>)  $\delta$  167.31, 153.51, 141.40, 138.40, 135.35, 129.11, 128.18, 126.18, 126.14, 125.89, 124.26, 121.63, 121.06, 43.11, 34.49, 31.99, 19.74, 14.04. **HRMS** calcd. for C<sub>20</sub>H<sub>22</sub>NS<sub>2</sub><sup>+</sup> [M+H]<sup>+</sup>: 340.1188, Found: 340.1191.



**(Z)-2-((3,4-dimethyl-5-phenylpent-4-en-1-yl)thio)benzothiazole (4s):** The title compound was prepared according to General Procedure 5. The crude residue was purified by mass-directed prep LC. The crude material was purified on a Waters Autopurification LC with a Waters BEH C18 column (19×160 mm, 5 mm) using a 0.1% aqueous formic acid:acetonitrile gradient (30 mL/min, main segment of gradient at 65–95% acetonitrile over 8 min) at ambient temperature. Fractionation was triggered by a Waters QDa single quadrupole mass spec in ESI+ ( $m/z = 340.1$  [M+H]<sup>+</sup>, cone voltage 15V). Purification afforded **4s** as a yellow liquid (5 mg, 7%). **<sup>1</sup>H NMR** (600 MHz, CDCl<sub>3</sub>) δ 7.84 (d,  $J = 7.9$  Hz, 1H), 7.74 (d,  $J = 8.0$ , 1.2 Hz, 1H), 7.46–7.38 (m, 1H), 7.30 (q,  $J = 7.2$ , 6.7 Hz, 3H), 7.21 (t,  $J = 7.3$  Hz, 1H), 7.17 (d,  $J = 7.5$  Hz, 2H), 6.39 (s, 1H), 3.27 (ddd,  $J = 13.1$ , 9.9, 5.4 Hz, 1H), 3.11–2.98 (m, 2H), 1.96 (dtd,  $J = 14.5$ , 9.5, 5.4 Hz, 1H), 1.84 (d,  $J = 1.5$  Hz, 3H), 1.78 (dtd,  $J = 13.7$ , 9.9, 6.1 Hz, 1H), 1.11 (d,  $J = 6.8$  Hz, 3H). **<sup>13</sup>C NMR** (150 MHz, CDCl<sub>3</sub>) δ 167.30, 153.48, 141.68, 138.40, 135.34, 128.86, 128.29, 127.05, 126.23, 126.11, 124.22, 121.59, 121.05, 34.60, 33.93, 31.80, 19.35, 18.26. **HRMS** calcd. for C<sub>20</sub>H<sub>22</sub>NS<sub>2</sub><sup>+</sup> [M+H]<sup>+</sup>: 340.1188, Found: 340.1194.

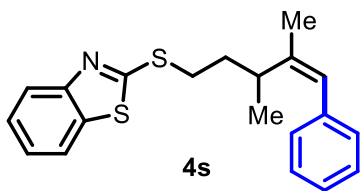

**(E)-2-((3-methyl-4-phenylpent-3-en-1-yl)thio)benzothiazole (4t):** The title compound was prepared according to General Procedure 3. The crude residue was purified by mass-directed prep LC. The crude material was purified on a Waters Autopurification LC with a Waters BEH C18 column (19×160 mm, 5 mm) using a 0.1% aqueous formic acid:acetonitrile gradient (30 mL/min, main segment of gradient at 65–95% acetonitrile over 8 min) at ambient temperature. Fractionation was triggered by a Waters QDa single quadrupole mass spec in ESI+ ( $m/z = 326.1$  [M+H]<sup>+</sup>, cone voltage 15V). Purification afforded **4t** as a yellow liquid (6 mg, 17%). **<sup>1</sup>H NMR** (600 MHz, CDCl<sub>3</sub>) δ 7.87 (d,  $J = 8.1$  Hz, 1H), 7.79–7.75 (m, 1H), 7.46–7.39 (m, 1H), 7.33–7.27 (m, 3H), 7.23–7.17 (m, 1H), 7.13–7.08 (m, 2H), 3.54–3.47 (m, 2H), 2.76–2.69 (m, 2H), 2.03 (s, 3H), 1.65 (s, 3H). **<sup>13</sup>C NMR** (150 MHz, CDCl<sub>3</sub>) δ 166.63, 152.88, 144.38, 134.77, 133.10, 128.04, 127.70, 127.58, 125.59, 125.55, 123.69, 120.99, 120.50, 33.65, 31.48, 20.44, 19.35. **HRMS** calcd. for C<sub>19</sub>H<sub>20</sub>NS<sub>2</sub><sup>+</sup> [M+H]<sup>+</sup>: 326.1032, Found: 326.1037.

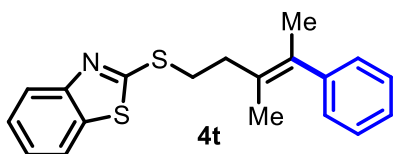

**(E)-2-((3-methyl-4-phenylpent-2-en-1-yl)thio)benzothiazole (4u) and 2-((3-methylene-4-phenylpentyl)thio)benzothiazole (4v):** The title compound was prepared according to General Procedure 3. The crude residue was purified by mass-directed prep LC. The crude material was purified on a Waters Autopurification LC with a Waters BEH C18 column (19×160 mm, 5 mm) using a 0.1% aqueous formic acid:acetonitrile gradient (30 mL/min, main segment of gradient at 65–95% acetonitrile over 8 min) at ambient temperature. Fractionation was triggered by a Waters QDa single quadrupole mass spec in ESI+ ( $m/z = 326.1$  [M+H]<sup>+</sup>, cone voltage 15V). Purification afforded a 2:1 mixture of **4u** and **4v** as a yellow liquid (15 mg, 14%). In this case, it was possible to distinguish

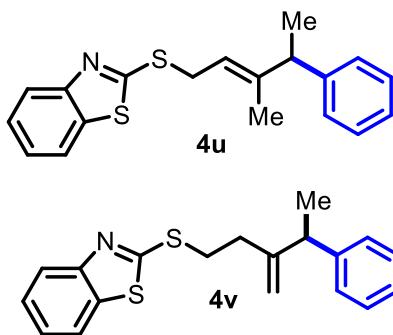

NMR peaks corresponding to each of the isomers, so their data are reported separately. **<sup>1</sup>H NMR** (600 MHz, CDCl<sub>3</sub>) (*E*)-2-((3-methyl-4-phenylpent-2-en-1-yl)thio)benzothiazole (**4u**): δ 7.86 (m, *J* = 8.2, 0.8 Hz, 1H), 7.75 (m, *J* = 7.9, 0.9 Hz, 1H), 7.41 (m, *J* = 8.3, 7.2, 1.2 Hz, 1H), 7.32–7.27 (m, 2H), 7.24–7.09 (m, 4H), 5.65 (tt, *J* = 7.7, 1.4 Hz, 1H), 4.06 (dd, *J* = 7.7, 4.3 Hz, 2H), 3.44–3.31 (m, 1H), 1.62 (s, *J* = 1.2 Hz, 3H), 1.35 (d, *J* = 7.1 Hz, 3H); 2-((3-methylene-4-phenylpentyl)thio)benzothiazole (**4v**): δ 7.85 (m, *J* = 8.2, 0.8 Hz, 1H), 7.74 (m, *J* = 7.9, 0.9 Hz, 1H), 7.41 (m, *J* = 8.3, 7.2, 1.2 Hz, 1H), 7.32–7.27 (m, 2H), 7.24–7.09 (m, 4H), 5.11 (s, 1H), 5.06 (s, 1H), 3.49 (q, *J* = 7.0 Hz, 1H), 3.44–3.31 (m, 2H), 2.52–2.31 (m, 2H), 1.40 (d, *J* = 7.1 Hz, 3H). **<sup>13</sup>C NMR** (150 MHz, CDCl<sub>3</sub>) **4u**: 166.93, 153.47, 145.34, 144.59, 135.53, 128.40, 127.57, 126.28, 126.16, 124.33, 121.70, 121.09, 117.94, 47.77, 32.03, 19.56, 15.34; **4v**: δ 167.12, 153.44, 150.69, 144.84, 135.33, 128.59, 127.68, 126.47, 126.12, 124.25, 121.60, 121.05, 111.09, 45.34, 34.76, 32.35, 20.75. **HRMS** calcd. for C<sub>19</sub>H<sub>20</sub>NS<sub>2</sub><sup>+</sup> [M+H]<sup>+</sup>: 326.1032, Found: 326.1034.

(*E*)-2-((6-methyl-6-phenylhept-4-en-2-yl)thio)benzothiazole (**4w**): The title compound was

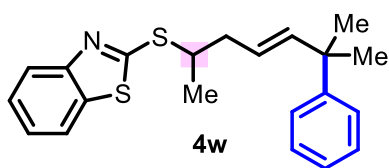

prepared according to General Procedure 5. The crude residue was purified by preparative TLC (5% Et<sub>2</sub>O/hexanes). Purification afforded **4w** as a yellow liquid (16 mg, 45%) as a 9:1 mixture of 2-((6-methylhept-5-en-2-yl)thio)benzothiazole to an inseparable isomer. **<sup>1</sup>H NMR** (600 MHz, CDCl<sub>3</sub>) δ 7.88 (d, *J* = 8.1 Hz, 1H),

7.76 (d, *J* = 7.9 Hz, 1H), 7.41 (t, *J* = 7.7 Hz, 1H), 7.36–7.27 (m, 5H), 7.18 (q, *J* = 7.5 Hz, 1H), 5.76 (d, *J* = 15.5 Hz, 1H), 5.52 (dt, *J* = 15.0, 7.1 Hz, 1H), 4.08 (h, *J* = 6.8 Hz, 1H), 2.58 (dt, *J* = 13.2, 6.4 Hz, 1H), 2.49 (dt, *J* = 14.2, 7.2 Hz, 1H), 1.50 (d, *J* = 6.8 Hz, 3H), 1.38 (s, 5H). **<sup>13</sup>C NMR** (150 MHz, CDCl<sub>3</sub>) δ 166.63, 153.55, 148.99, 143.85, 135.45, 128.20, 126.29, 126.12, 125.88, 124.36, 122.35, 121.73, 121.05, 44.43, 40.74, 40.11, 28.93, 28.91, 20.94. **HRMS** calcd. for C<sub>21</sub>H<sub>24</sub>NS<sub>2</sub><sup>+</sup> [M+H]<sup>+</sup>: 354.1345, Found: 354.1360.

## Unsuccessful Substrates in Oxidative Heck Reaction Substrates

Table S6. Unsuccessful Substrates in Oxidative Heck Reaction Substrates

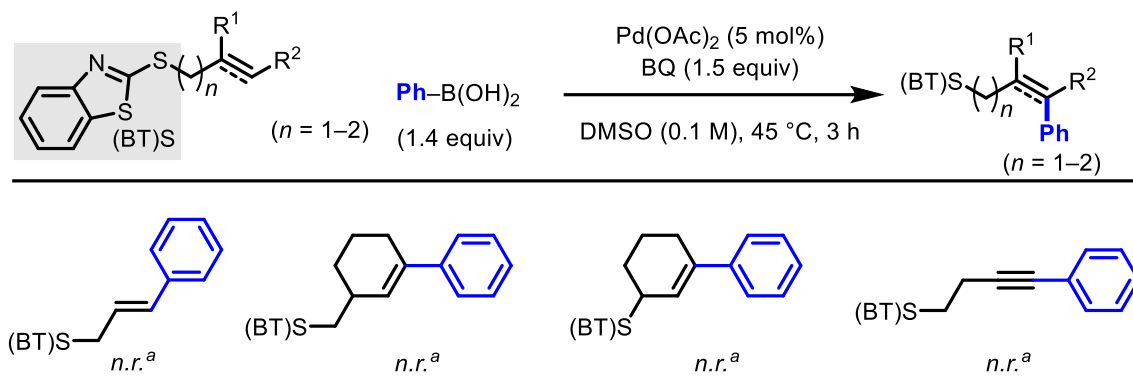

<sup>a</sup>n.r.=no reaction.

### Starting Material Synthesis for C–H Functionalization

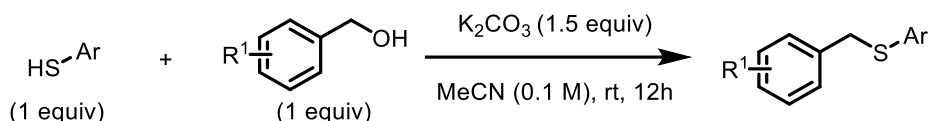

**Scheme S5.** General Procedure 6.

**General Procedure 6:** To a 50-mL round-bottom flask equipped with a magnetic stir bar were added the bromide (1.0 mmol, 1 equiv), thiol (1.0 mmol, 1 equiv), K<sub>2</sub>CO<sub>3</sub> (1.5 mmol, 1.5 equiv) and MeCN (10 mL, 0.1 M) in air. The reaction was stirred at room temperature for 12 h. The organic materials were separated by addition of H<sub>2</sub>O (25 mL), followed by extraction with EtOAc (3 × 10 mL) and dried with Na<sub>2</sub>SO<sub>4</sub>. The solvent was removed *in vacuo*, and the crude residue was purified by SiO<sub>2</sub> gel column chromatography or preparative TLC.

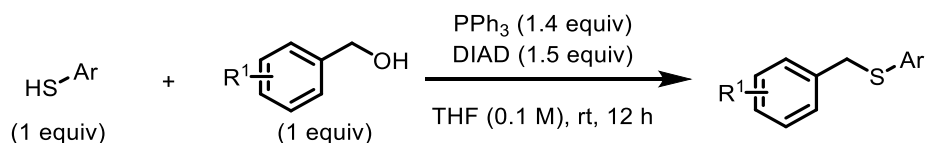

**Scheme S6.** General Procedure 7.

**General Procedure 7:** To a 50-mL round-bottom flask equipped with a magnetic stir bar and containing the alcohol (1.0 mmol, 1 equiv), thiol (1.0 mmol, 1 equiv), PPh<sub>3</sub> (1.4 mmol, 1.4 equiv), and THF (10 mL, 0.1 M) was added DIAD (1.5 mmol, 1.5 equiv) dropwise in air. The reaction was stirred at room temperature for 12 h. The organic materials were separated by addition of H<sub>2</sub>O (25 mL), followed by extraction with EtOAc (3 × 10 mL) and dried with Na<sub>2</sub>SO<sub>4</sub>. The solvent was removed *in vacuo*, and the crude residue was purified by SiO<sub>2</sub> gel column chromatography or preparative TLC.

### Characterization Data for Starting Materials for C–H Functionalization

**benzyl(phenyl)sulfane (VIII-B):** The title compound was prepared according to General Procedure 7. The crude residue was purified by SiO<sub>2</sub> gel column chromatography (5% EtOAc/hexanes). Purification afforded **VII-B** as a yellow solid (162 mg, 81%). Characterization data were consistent with previously reported data.<sup>8</sup>

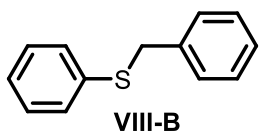

**benzyl(*p*-tolyl)sulfane (VIII-C):** The title compound was prepared according to General Procedure 7. The crude residue was purified by SiO<sub>2</sub> gel column chromatography (5% EtOAc/hexanes). Purification afforded **VII-C** as a yellow liquid (171 mg, 80%). Characterization data were consistent with previously reported data.<sup>9</sup>

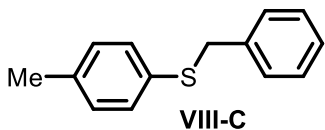

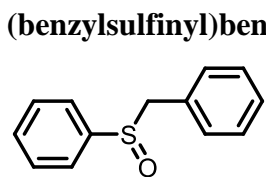

VIII-D

**(benzylsulfinyl)benzene (VIII-D):** In a 10-mL round-bottom flask equipped with a stir bar were added benzyl(phenyl)sulfane (**VIII-B**) (0.500 mmol, 1 equiv) and DCM (5 mL, 0.1 M). The mixture was cooled in an ice-water bath and then *m*-CPBA (0.500 mmol, 1 equiv) was added. The mixture was stirred for 1 h and then washed with NaOH (3 mL, 0.2 M). The organic layer was removed and the solvent was removed *in vacuo*. Ether was then added and the mixture was cooled to -5 ° C for 12 h. Solvent was removed and white precipitate was isolated. Purification afforded **VIII-D** as a white solid (87 mg, 80%). Characterization data were consistent with previously reported data.<sup>10</sup>

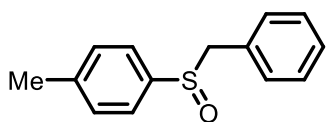

VIII-E

**1-(benzylsulfinyl)-4-methylbenzene (VIII-E):** In a 10-mL round-bottom flask equipped with a stir bar were added benzyl(*p*-tolyl)sulfane (**VIII-C**) (0.500 mmol, 1 equiv) and DCM (5 mL, 0.1 M). The mixture was cooled in an ice-water bath and then *m*-CPBA (0.500 mmol, 1 equiv) was added. The mixture was stirred for 1 h and then washed with NaOH (3 mL, 0.2 M). The organic layer was removed and the solvent was removed *in vacuo*. Ether was then added and the mixture was cooled to -5 ° C for 12 h. Solvent was removed and white precipitate was isolated. Purification afforded **VIII-E** as a white solid (97 mg, 84%). Characterization data were consistent with previously reported data.<sup>10</sup>

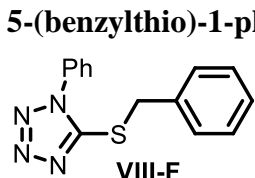

VIII-F

**5-(benzylthio)-1-phenyl-1H-tetrazole (VIII-F):** The title compound was prepared according to General Procedure 7. The crude residue was purified by SiO<sub>2</sub> gel column chromatography (20% EtOAc/hexanes). Purification afforded **VIII-F** as a white solid (134 mg, 50%). <sup>1</sup>H NMR (600 MHz, CDCl<sub>3</sub>) δ 7.60–7.49 (m, 5H), 7.48–7.42 (m, 2H), 7.38–7.30 (m, 3H), 4.66 (s, 2H). <sup>13</sup>C NMR (150 MHz, CDCl<sub>3</sub>) δ 154.05, 135.35, 133.77, 130.25, 129.90, 129.39, 128.99, 128.35, 123.96, 37.81. HRMS calcd. for C<sub>14</sub>H<sub>13</sub>N<sub>4</sub>S<sup>+</sup> [M+H]<sup>+</sup>: 269.0855, Found: 269.0866.

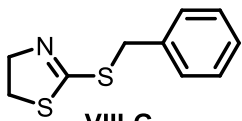

VIII-G

**2-(benzylthio)-4,5-dihydrothiazole (VIII-G):** The title compound was prepared according to General Procedure 7. The crude residue was purified by SiO<sub>2</sub> gel column chromatography (20% EtOAc/hexanes). Purification afforded **VIII-G** as an orange solid (168 mg, 80%). <sup>1</sup>H NMR (600 MHz, CDCl<sub>3</sub>) δ 7.38–7.34 (m, 2H), 7.33–7.29 (m, 2H), 7.27 (d, *J* = 7.4 Hz, 1H), 4.36 (s, 2H), 4.24 (t, *J* = 8.0 Hz, 2H), 3.41 (t, *J* = 8.0 Hz, 2H). <sup>13</sup>C NMR (150 MHz, CDCl<sub>3</sub>) δ 136.73, 129.17, 128.75, 127.64, 64.40, 37.14, 35.81. HRMS calcd. for C<sub>10</sub>H<sub>12</sub>NS<sub>2</sub><sup>+</sup> [M+H]<sup>+</sup>: 210.0406, Found: 210.0409.

**2-(benzylthio)-1H-benzimidazole (VIII-H):** The title compound was prepared according to

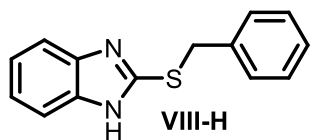

General Procedure 6. The crude residue was purified by SiO<sub>2</sub> gel column chromatography (40% EtOAc/hexanes). Purification afforded **VIII-H** as a white solid (157 mg, 64%). <sup>1</sup>H NMR (600 MHz, CDCl<sub>3</sub>) δ 11.00 (s, 1H), 7.37 (d, *J* = 7.1 Hz, 2H), 7.32 (t, *J* = 7.5 Hz, 2H), 7.29–7.26 (m, 2H), 7.21–7.16 (m, 1H), 7.12 (td, *J* = 7.8, 1.1 Hz, 1H), 7.04 (d, *J* = 8.0 Hz, 1H), 5.55 (s, 2H). <sup>13</sup>C NMR (150 MHz, CDCl<sub>3</sub>) δ 169.14, 135.48, 132.84, 130.64, 128.95, 128.05, 127.67, 123.66, 123.15, 110.19, 110.04, 47.93. HRMS calcd. for C<sub>14</sub>H<sub>13</sub>N<sub>2</sub>S<sup>+</sup> [M+H]<sup>+</sup>: 241.0794, Found: 241.0799.

**2-(benzylsulfinyl)benzothiazole (VIII-I):** To a 25-mL round-bottom flask equipped with a

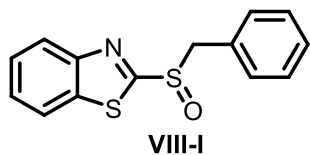

magnetic stir bar was charged 2-(benzylthio)benzothiazole (0.5 mmol, 1 equiv) and DCM (5 mL, 0.1 M). The mixture was cooled to 0 °C. A solution of mCPBA (0.5 mmol, 1 equiv) in DCM (5 mL, 0.1 M) was then added dropwise. The reaction was stirred for 4 h. The organic materials

were separated by addition of H<sub>2</sub>O (0.2 M, 25 mL), followed by extraction with EtOAc (3 × 10 mL). The organic layer was dried over Na<sub>2</sub>SO<sub>4</sub>, and after filtration the solvent was removed *in vacuo*. The crude residue was purified by SiO<sub>2</sub> gel column chromatography (40% EtOAc/hexanes). Purification afforded **VIII-I** as a white solid (114 mg, 81%). <sup>1</sup>H NMR (600 MHz, CDCl<sub>3</sub>) δ 8.10 (d, *J* = 8.2 Hz, 1H), 7.94 (d, *J* = 8.0 Hz, 1H), 7.61–7.54 (m, 1H), 7.52–7.46 (m, 1H), 7.34–7.29 (m, 1H), 7.28 (d, *J* = 7.6 Hz, 2H), 7.20–7.16 (m, 2H), 4.52 (d, *J* = 13.2 Hz, 1H), 4.34 (d, *J* = 13.2 Hz, 1H). <sup>13</sup>C NMR (150 MHz, CDCl<sub>3</sub>) δ 177.10, 153.87, 136.16, 130.60, 128.88, 128.84, 128.51, 127.05, 126.28, 124.05, 122.39, 62.98. HRMS calcd. for C<sub>14</sub>H<sub>12</sub>NOS<sub>2</sub><sup>+</sup> [M+H]<sup>+</sup>: 274.0355, Found: 274.0359.

**2-(benzylsulfonyl)benzothiazole (VIII-J):** To a 10-mL round-bottom flask equipped with a

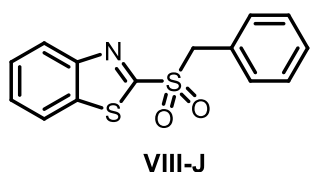

magnetic stir bar were added 2-(benzylthio)benzothiazole (0.1 mmol, 1 equiv), 30% aqueous H<sub>2</sub>O<sub>2</sub> (0.2 mL, 6 equiv), ammonium heptamolybdate tetrahydrate (0.001 mmol, 1 mol%), and ethanol (2 mL, 0.05 M). The reaction was stirred at room temperature for 12 h. The organic materials

were separated by addition of H<sub>2</sub>O (25 mL), followed by extraction with EtOAc (3 × 10 mL). The organic solution was washed with brine (10 mL) and dried over Na<sub>2</sub>SO<sub>4</sub>. After filtration, the solvent was removed *in vacuo*, and **VIII-J** was obtained as a white solid (29 mg, >95%). <sup>1</sup>H NMR (600 MHz, CDCl<sub>3</sub>) δ 8.26 (d, *J* = 8.1 Hz, 1H), 7.94 (dd, *J* = 8.1, 1.1 Hz, 1H), 7.65 (ddd, *J* = 8.2, 7.0, 1.2 Hz, 1H), 7.58 (ddd, *J* = 8.3, 7.2, 1.1 Hz, 1H), 7.35–7.29 (m, 1H), 7.30–7.25 (m, 4H), 4.76 (s, 2H). <sup>13</sup>C NMR (150 MHz, CDCl<sub>3</sub>) δ 165.31, 152.70, 137.18, 131.24, 129.35, 129.03, 128.13, 127.77, 126.46, 125.61, 122.41, 61.14. HRMS calcd. for C<sub>14</sub>H<sub>12</sub>NO<sub>2</sub>S<sub>2</sub><sup>+</sup> [M+H]<sup>+</sup>: 290.0304, Found: 290.0305.

**2-(benzylthio)thiazolo[5,4-b]pyridine (VIII-K):** The title compound was prepared according to

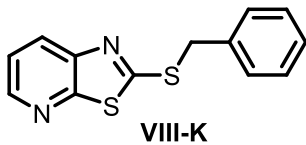

General Procedure 7. The crude residue was purified by SiO<sub>2</sub> gel column chromatography (10% EtOAc/hexanes). Purification afforded **VIII-K** as a white solid (244 mg, 95%). <sup>1</sup>H NMR (600 MHz, CDCl<sub>3</sub>) δ 8.45 (dd, *J* = 4.7, 1.5 Hz, 1H), 8.08 (dd, *J* = 8.2, 1.6 Hz, 1H), 7.49–7.43 (m, 2H), 7.40–7.32 (m, 3H), 7.32–7.27 (m, 1H), 4.62 (s, 2H). <sup>13</sup>C NMR (150 MHz, CDCl<sub>3</sub>) δ 168.18, 158.98, 146.42, 145.87, 135.97, 129.31, 128.92, 128.08, 128.03, 121.30, 37.13. HRMS calcd. for C<sub>13</sub>H<sub>11</sub>N<sub>2</sub>S<sub>2</sub> [M+H]<sup>+</sup>: 259.0358, Found: 259.0365.

**2-(benzylthio)-5-chlorobenzothiazole (VIII-L):** The title compound was prepared according to

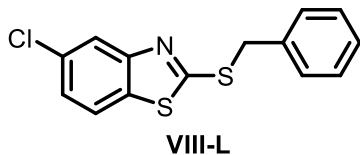

General Procedure 6. The crude residue was purified by SiO<sub>2</sub> gel column chromatography (20% EtOAc/hexanes). Purification afforded **VIII-L** as a white solid (120 mg, 41%). <sup>1</sup>H NMR (600 MHz, CDCl<sub>3</sub>) δ 7.88 (d, *J* = 2.0 Hz, 1H), 7.65 (d, *J* = 8.5 Hz, 1H), 7.45 (dd, *J* = 7.3, 1.8 Hz, 2H), 7.34 (dd, *J* = 8.3, 6.6 Hz, 2H), 7.31–7.25 (m, 2H), 4.60 (s, 2H). <sup>13</sup>C NMR (150 MHz, CDCl<sub>3</sub>) δ 168.77, 154.10, 136.14, 133.71, 132.28, 129.28, 128.88, 127.99, 124.77, 121.75, 121.59, 37.82. HRMS calcd. for C<sub>14</sub>H<sub>11</sub>ClNS<sub>2</sub><sup>+</sup> [M+H]<sup>+</sup>: 292.0016, Found: 292.0026.

**2-(benzylthio)-6-ethoxybenzothiazole (VIII-M):** The title compound was prepared according to

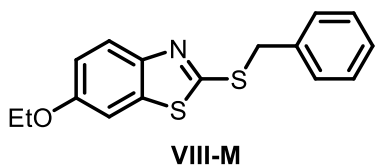

General Procedure 6. The crude residue was purified by SiO<sub>2</sub> gel column chromatography (20% EtO<sub>2</sub>/hexanes). Purification afforded **VIII-M** as a white solid (272 mg, 91%). <sup>1</sup>H NMR (600 MHz, CDCl<sub>3</sub>) δ 7.78 (d, *J* = 8.8 Hz, 1H), 7.44 (d, *J* = 7.0 Hz, 2H), 7.32 (t, *J* = 7.5 Hz, 2H), 7.28 (d, *J* = 7.1 Hz, 1H), 7.21 (d, *J* = 2.5 Hz, 1H), 7.01 (dd, *J* = 8.9, 2.5 Hz, 1H), 4.56 (s, 2H), 4.07 (q, *J* = 7.0 Hz, 2H), 1.44 (t, *J* = 6.9 Hz, 3H). <sup>13</sup>C NMR (150 MHz, CDCl<sub>3</sub>) δ 163.09, 156.60, 147.82, 136.84, 136.47, 129.26, 128.83, 127.85, 122.20, 115.49, 104.96, 64.27, 38.13, 14.98. HRMS calcd. for C<sub>16</sub>H<sub>16</sub>NOS<sub>2</sub><sup>+</sup> [M+H]<sup>+</sup>: 302.0668, Found: 302.0679.

**2-(benzylthio)-5-(trifluoromethoxy)benzothiazole (VIII-N):** The title compound was prepared

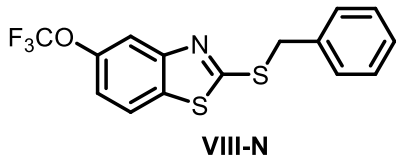

according to General Procedure 7. The crude residue was purified by SiO<sub>2</sub> gel column chromatography (5% EtOAc/hexanes). Purification afforded **VIII-N** as a yellow solid (245 mg, 95%). <sup>1</sup>H NMR (600 MHz, CDCl<sub>3</sub>) δ 7.76 (dd, *J* = 2.4, 1.2 Hz, 1H), 7.73 (d, *J* = 8.7 Hz, 1H), 7.46 (dd, *J* = 7.5, 1.7 Hz, 2H), 7.37–7.32 (m, 2H), 7.31–7.27 (m, 1H), 7.20–7.17 (m, 1H), 4.62 (s, 2H). <sup>13</sup>C NMR (150 MHz, CDCl<sub>3</sub>) δ 169.59, 153.92, 148.01, 148.00, 136.04, 133.77, 129.28, 128.91, 128.03, 121.73, 121.55, 119.85, 117.86, 114.20, 37.83. <sup>19</sup>F NMR (376 MHz, CDCl<sub>3</sub>) δ -58.99. HRMS calcd. for C<sub>15</sub>H<sub>11</sub>F<sub>3</sub>NOS<sub>2</sub><sup>+</sup> [M+H]<sup>+</sup>: 342.0229, Found: 342.0234.

**2-((2,3-dimethoxybenzyl)thio)benzothiazole (5a):** The title compound was prepared on a 10 mmol

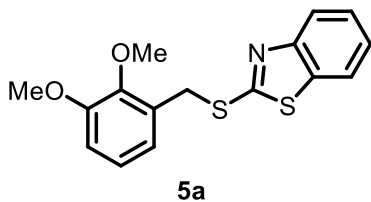

**5a**

scale according to General Procedure 6. The crude residue was purified by SiO<sub>2</sub> gel column chromatography (15% EtOAc/hexanes). Purification afforded **5a** as a yellow liquid (3.174 g, >95%). <sup>1</sup>H NMR (600 MHz, CDCl<sub>3</sub>) δ 7.90 (d, *J* = 8.1 Hz, 1H), 7.75 (d, *J* = 8.0 Hz, 1H), 7.45–7.40 (m, 1H), 7.32–7.27 (m, 1H), 7.08 (dd, *J* = 7.7, 1.5 Hz, 1H), 7.00 (t, *J* = 8.0 Hz, 1H), 6.87 (dd, *J* = 8.2, 1.5 Hz, 1H), 4.65 (s, 2H), 3.94 (s, 3H), 3.87 (s, 3H). <sup>13</sup>C NMR (150 MHz, CDCl<sub>3</sub>) δ 166.89, 153.20, 152.72, 147.57, 135.31, 130.02, 125.99, 124.17, 123.96, 122.46, 121.46, 120.97, 112.31, 61.10, 55.75, 32.30. HRMS calcd. for C<sub>16</sub>H<sub>16</sub>NO<sub>2</sub>S<sub>2</sub><sup>+</sup> [M+H]<sup>+</sup>: 318.0617, Found: 318.0631.

**(R)-3-(3,4-dimethoxyphenyl)-1-methoxy-1-oxopropan-2-yl acrylate (5a')**: The title compound

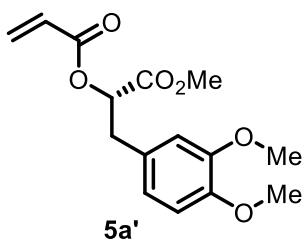

**5a'**

was prepared following a literature procedure.<sup>11</sup> To a 50-mL round-bottom flask with methyl (*R*)-3-(3,4-dimethoxyphenyl)-2-hydroxypropanoate (4.5 mmol, 1 equiv), DMAP (9.0 mmol, 2 equiv) and acrylic acid (6.75 mmol, 1.5 equiv) in CH<sub>2</sub>Cl<sub>2</sub> (15 mL, 27 mM) at 0 °C was added EDC•HCl (9.0 mmol, 2 equiv). The reaction mixture was slowly warmed up to room temperature and stirred overnight. After cooling the reaction mixture to 0 °C, 2.0 N HCl solution (25 mL) was added. The aqueous layer was extracted with Et<sub>2</sub>O (3 × 20 mL) and dried with Na<sub>2</sub>SO<sub>4</sub>. The crude residue was purified by SiO<sub>2</sub> gel column chromatography (1–10% Et<sub>2</sub>O/CH<sub>2</sub>Cl<sub>2</sub>). Purification afforded **5a'** as a yellow liquid (1.20 g, 90%). <sup>1</sup>H NMR (600 MHz, CDCl<sub>3</sub>) δ 6.82–6.74 (m, 3H), 6.44 (dd, *J* = 17.3, 1.3 Hz, 1H), 6.15 (dd, *J* = 17.3, 10.4 Hz, 1H), 5.88 (dd, *J* = 10.5, 1.3 Hz, 1H), 5.28 (dd, *J* = 8.4, 4.6 Hz, 1H), 3.86 (s, 6H), 3.73 (s, 3H), 3.18–3.07 (m, 2H). <sup>13</sup>C NMR (150 MHz, CDCl<sub>3</sub>) δ 170.20, 165.42, 148.93, 148.23, 132.11, 128.40, 127.71, 121.57, 112.58, 111.29, 73.35, 56.00, 55.97, 52.51, 37.20. HRMS calcd. for C<sub>15</sub>H<sub>18</sub>O<sub>6</sub>Na<sup>+</sup> [M+Na]<sup>+</sup>: 317.0996, Found: 317.0996.

**2-((3-methylbenzyl)thio)benzothiazole (5b):** The title compound was prepared according to

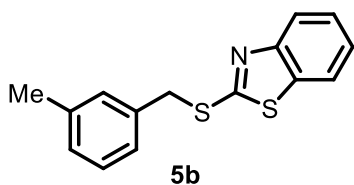

**5b**

General Procedure 6. The crude residue was purified by SiO<sub>2</sub> gel column chromatography (15% EtOAc/hexanes). Purification afforded **5b** as a yellow liquid (260 mg, >95%). <sup>1</sup>H NMR (600 MHz, CDCl<sub>3</sub>) δ 7.91 (dt, *J* = 8.1, 0.9 Hz, 1H), 7.76 (dd, *J* = 8.0, 1.1 Hz, 1H), 7.43 (td, *J* = 7.7, 1.2 Hz, 1H), 7.30 (ddd, *J* = 8.2, 7.4, 1.1 Hz, 1H), 7.28–7.24 (m, 2H), 7.22 (t, *J* = 7.5 Hz, 1H), 7.10 (d, *J* = 7.4 Hz, 1H), 4.58 (s, 2H), 2.35 (s, 3H). <sup>13</sup>C NMR (150 MHz, CDCl<sub>3</sub>) δ 166.56, 153.19, 138.38, 135.91, 135.31, 129.85, 128.61, 128.56, 126.21, 126.05, 124.24, 121.53, 121.00, 37.74, 21.38. HRMS calcd. for C<sub>15</sub>H<sub>14</sub>NS<sub>2</sub><sup>+</sup> [M+H]<sup>+</sup>: 272.0562, Found: 272.0573.



**2-(benzylthio)benzothiazole (5c):** The title compound was prepared on a 10 mmol scale according to General Procedure 6. The crude residue was purified by SiO<sub>2</sub> gel column chromatography (20% EtOAc/hexanes). Purification afforded **5c** as a white solid (2.57 mg, >95%). <sup>1</sup>H NMR (600 MHz, CDCl<sub>3</sub>) δ 7.90 (ddd, *J* = 8.2, 1.2, 0.6 Hz, 1H), 7.75 (ddd, *J* = 8.0, 1.3, 0.6 Hz, 1H), 7.49–7.40 (m, 3H), 7.36–7.28 (m, 4H), 4.61 (s, 2H). <sup>13</sup>C NMR (150 MHz, CDCl<sub>3</sub>) δ 166.50, 153.26, 136.28, 135.43, 129.24, 128.81, 127.86, 126.16, 124.39, 121.66, 121.11, 37.82. HRMS calcd. for C<sub>14</sub>H<sub>12</sub>NS<sub>2</sub><sup>+</sup> [M+H]<sup>+</sup>: 258.0406, Found: 258.0417.

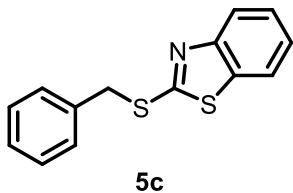

**2-((2-chlorobenzyl)thio)benzothiazole (5d):** The title compound was prepared according to General Procedure 6. The crude residue was purified by SiO<sub>2</sub> gel column chromatography (15% EtOAc/hexanes). Purification afforded **5d** as a yellow liquid (186 mg, 64%). <sup>1</sup>H NMR (600 MHz, CDCl<sub>3</sub>) δ 7.94–7.89 (m, 1H), 7.75 (dd, *J* = 8.0, 1.2 Hz, 1H), 7.60 (dd, *J* = 7.2, 2.1 Hz, 1H), 7.43 (ddd, *J* = 8.3, 7.3, 1.2 Hz, 1H), 7.40 (dd, *J* = 7.5, 1.7 Hz, 1H), 7.30 (td, *J* = 7.7, 7.3, 1.2 Hz, 1H), 7.22 (pd, *J* = 7.4, 1.8 Hz, 2H), 4.74 (s, 2H). <sup>13</sup>C NMR (150 MHz, CDCl<sub>3</sub>) δ 165.99, 153.03, 135.40, 134.34, 134.26, 131.22, 129.62, 129.12, 126.93, 125.99, 124.25, 121.50, 120.98, 35.18. HRMS calcd. for C<sub>14</sub>H<sub>11</sub>ClNS<sub>2</sub><sup>+</sup> [M+H]<sup>+</sup>: 292.0016, Found: 292.0024.

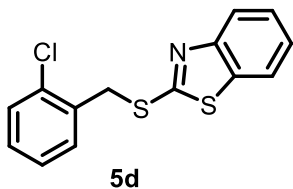

**2-((4-isopropylbenzyl)thio)benzothiazole (5e):** The title compound was prepared according to General Procedure 7. The crude residue was purified by SiO<sub>2</sub> gel column chromatography (15% EtOAc/hexanes). Purification afforded **5e** as a white solid (268 mg, 89%). <sup>1</sup>H NMR (600 MHz, CDCl<sub>3</sub>) δ 7.90 (d, *J* = 8.1 Hz, 1H), 7.76 (dd, *J* = 8.0, 1.2 Hz, 1H), 7.43 (ddd, *J* = 8.3, 7.3, 1.2 Hz, 1H), 7.38 (d, *J* = 8.0 Hz, 2H), 7.32–7.28 (m, 1H), 7.20 (d, *J* = 8.1 Hz, 2H), 4.59 (s, 2H), 2.90 (p, *J* = 6.9 Hz, 1H), 1.24 (d, *J* = 6.9 Hz, 6H). <sup>13</sup>C NMR (150 MHz, CDCl<sub>3</sub>) δ 166.77, 153.30, 148.60, 135.40, 133.42, 129.21, 126.90, 126.14, 124.33, 121.63, 121.09, 37.63, 33.93, 24.05. HRMS calcd. for C<sub>17</sub>H<sub>18</sub>NS<sub>2</sub><sup>+</sup> [M+H]<sup>+</sup>: 300.0875, Found: 300.0885.

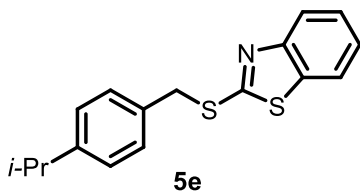

**2-((2-methylbenzyl)thio)benzothiazole (5f):** The title compound was prepared according to General Procedure 7. The crude residue was purified by SiO<sub>2</sub> gel column chromatography (10% EtOAc/hexanes). Purification afforded **5f** as a clear liquid (252 mg, 97%). <sup>1</sup>H NMR (600 MHz, CDCl<sub>3</sub>) δ 7.91 (d, *J* = 8.1, 0.8 Hz, 1H), 7.76 (d, *J* = 8.0, 0.8 Hz, 1H), 7.46–7.39 (m, 2H), 7.31 (ddd, *J* = 8.2, 7.3, 1.2 Hz, 1H), 7.24–7.15 (m, 3H), 4.64 (s, 2H), 2.46 (s, 3H). <sup>13</sup>C NMR (150 MHz, CDCl<sub>3</sub>) δ 166.74, 153.35, 137.31, 135.43, 133.79, 130.78, 130.37, 128.32, 126.46, 126.20, 124.43, 121.67, 121.16, 36.16, 19.44. HRMS calcd. for C<sub>15</sub>H<sub>14</sub>NS<sub>2</sub><sup>+</sup> [M+H]<sup>+</sup>: 272.0562, Found: 272.0573.

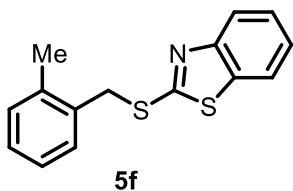

**2-((3-fluoro-2-methylbenzyl)thio)benzothiazole (5g):** The title compound was prepared according

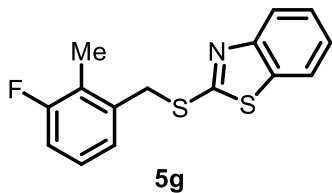

to General Procedure 7. The crude residue was purified by SiO<sub>2</sub> gel column chromatography (8% EtOAc/hexanes). Purification afforded **5g** as a yellow liquid (288 mg, >95%). <sup>1</sup>H NMR (500 MHz, CDCl<sub>3</sub>) δ 7.92 (d, *J* = 8.1 Hz, 1H), 7.76 (d, *J* = 7.9 Hz, 1H), 7.44 (t, *J* = 7.7 Hz, 1H), 7.31 (t, *J* = 7.6 Hz, 1H), 7.22 (d, *J* = 7.6 Hz, 1H), 7.11 (q, *J* = 7.6 Hz, 1H), 6.98 (t, *J* = 8.9 Hz, 1H), 4.65 (s, 2H), 2.35 (s, 2H). <sup>13</sup>C NMR (150 MHz, CDCl<sub>3</sub>) δ 166.14, 162.32, 160.70, 153.26, 136.44, 136.41, 135.47, 127.07, 127.01, 126.25, 125.86, 125.84, 124.56, 124.53, 124.44, 121.71, 121.19, 115.02, 114.86, 35.64, 10.71. <sup>19</sup>F NMR (376 MHz, CDCl<sub>3</sub>) δ -116.24. HRMS calcd. for C<sub>15</sub>H<sub>13</sub>FNS<sub>2</sub><sup>+</sup> [M+H]<sup>+</sup>: 290.0468, Found: 290.0474.

**2-((3-(difluoromethoxy)benzyl)thio)benzothiazole (5h):** The title compound was prepared

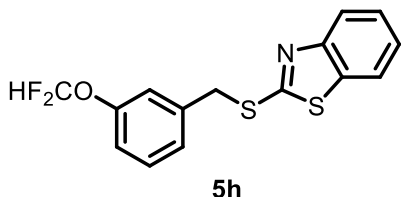

according to General Procedure 7. The crude residue was purified by SiO<sub>2</sub> gel column chromatography (15% EtOAc/hexanes). Purification afforded **5h** as a white solid (299 mg, 92%). <sup>1</sup>H NMR (600 MHz, CDCl<sub>3</sub>) δ 7.80 (d, *J* = 8.1 Hz, 1H), 7.65 (dd, *J* = 7.9, 1.2 Hz, 1H), 7.50 (dd, *J* = 7.6, 1.7 Hz, 1H), 7.36–7.30 (m, 1H), 7.22–7.17 (m, 2H), 7.08–7.03 (m, 2H), 6.49 (t, *J* = 73.7 Hz, 1H), 4.57 (s, 2H). <sup>13</sup>C NMR (150 MHz, CDCl<sub>3</sub>) δ 166.08, 153.12, 149.65, 149.63, 149.61, 135.46, 131.47, 129.31, 128.34, 126.09, 125.57, 124.35, 121.55, 121.05, 118.79, 117.97, 116.25, 116.23, 114.52, 31.75. <sup>19</sup>F NMR (376 MHz, CDCl<sub>3</sub>) δ -80.22. HRMS calcd. for C<sub>15</sub>H<sub>12</sub>F<sub>2</sub>NOS<sub>2</sub><sup>+</sup> [M+H]<sup>+</sup>: 324.0323, Found: 324.0334.

**2-((naphthalen-1-ylmethyl)thio)benzothiazole (5i):** The title compound was prepared according

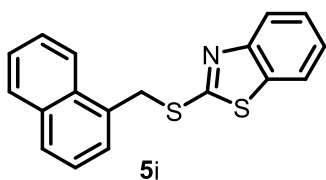

to General Procedure 6. The crude residue was purified by SiO<sub>2</sub> gel column chromatography (15% EtOAc/hexanes). Purification afforded **5i** as a white solid (264 mg, 85%). <sup>1</sup>H NMR (600 MHz, CDCl<sub>3</sub>) δ 8.16 (d, *J* = 8.4 Hz, 1H), 7.96 (d, *J* = 8.1 Hz, 1H), 7.89 (dd, *J* = 8.1, 1.3 Hz, 1H), 7.83 (d, *J* = 8.2 Hz, 1H), 7.80–7.76 (m, 1H), 7.65 (d, *J* = 6.9 Hz, 1H), 7.57 (ddd, *J* = 8.5, 6.8, 1.4 Hz, 1H), 7.53 (ddd, *J* = 8.0, 6.8, 1.2 Hz, 1H), 7.48–7.44 (m, 1H), 7.42 (dd, *J* = 8.3, 7.0 Hz, 1H), 7.35–7.30 (m, 1H), 5.13 (s, 2H). <sup>13</sup>C NMR (150 MHz, CDCl<sub>3</sub>) δ 166.51, 153.15, 135.28, 133.86, 131.47, 131.33, 128.85, 128.05, 126.52, 126.03, 125.97, 125.34, 124.24, 123.59, 121.49, 121.00, 35.55. HRMS calcd. for C<sub>18</sub>H<sub>14</sub>NS<sub>2</sub><sup>+</sup> [M+H]<sup>+</sup>: 308.0562, Found: 308.0571.

**2-((naphthalen-2-ylmethyl)thio)benzothiazole (5j):** The title compound was prepared according

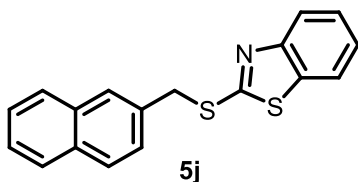

to General Procedure 6. The crude residue was purified by SiO<sub>2</sub> gel column chromatography (15% EtOAc/hexanes). Purification afforded **5j** as a yellow solid (248 mg, 81%). <sup>1</sup>H NMR (600 MHz, CDCl<sub>3</sub>) δ 7.92 (d, *J* = 6.2 Hz, 2H), 7.82 (t, *J* = 7.8 Hz, 3H), 7.75 (d, *J* = 8.0 Hz, 1H), 7.57 (dd, *J* = 8.5, 1.8 Hz, 1H), 7.48 (dd, *J* = 6.5, 3.0 Hz, 2H), 7.45–7.41 (m, 1H), 7.32–7.28 (m, 1H), 4.78 (s, 2H). <sup>13</sup>C NMR (150 MHz, CDCl<sub>3</sub>) δ 166.40, 153.23, 135.42, 133.60, 133.34, 132.86, 128.63, 128.14, 127.87, 127.77, 126.99, 126.40, 126.22,

126.15, 124.37, 121.64, 121.09, 38.07. **HRMS** calcd. for  $C_{18}H_{14}NS_2^+$   $[M+H]^+$ : 308.0562, Found: 308.0574.

**2-((4-fluorobenzyl)thio)benzothiazole (5k)**: The title compound was prepared according to

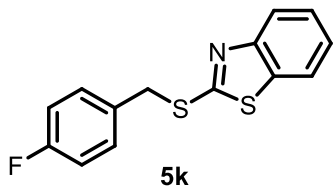

**5k**

General Procedure 7. The crude residue was purified by  $SiO_2$  plug (50% EtOAc/hexanes). Purification afforded **5k** as a yellow solid (262 mg, >95%).  **$^1H$  NMR** (600 MHz,  $CDCl_3$ )  $\delta$  7.90 (d,  $J$  = 8.1 Hz, 1H), 7.76 (dd,  $J$  = 8.0, 1.2 Hz, 1H), 7.43 (td,  $J$  = 6.2, 5.4, 1.3 Hz, 3H), 7.33–7.28 (m, 1H), 7.01 (t,  $J$  = 8.7 Hz, 2H), 4.58 (s, 2H).  **$^{13}C$  NMR** (150 MHz,  $CDCl_3$ )  $\delta$  166.05, 163.13, 161.50, 153.16, 135.41, 132.20, 132.18, 130.89, 130.83, 126.16, 124.43, 121.63, 121.10, 115.71, 115.57, 36.91.  **$^{19}F$  NMR** (376 MHz,  $CDCl_3$ )  $\delta$  -114.78. **HRMS** calcd. for  $C_{14}H_{11}FNS_2^+$   $[M+H]^+$ : 276.0312, Found: 276.0316.

**2-((2-fluorobenzyl)thio)benzothiazole (5l)**: The title compound was prepared according to General

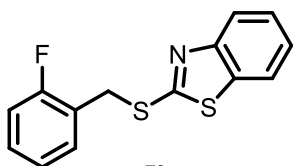

**5l**

Procedure 7. The crude residue was purified by  $SiO_2$  plug (8% EtOAc/hexanes). Purification afforded **5l** as a yellow liquid (269 mg, >95%).  **$^1H$  NMR** (500 MHz,  $CDCl_3$ )  $\delta$  7.91 (d,  $J$  = 8.1 Hz, 1H), 7.75 (dd,  $J$  = 8.0, 1.2 Hz, 1H), 7.53 (td,  $J$  = 7.7, 1.8 Hz, 1H), 7.48–7.41 (m, 1H), 7.34–7.26 (m, 2H), 7.13–7.03 (m, 2H), 4.66 (s, 2H).  **$^{13}C$  NMR** (150 MHz,  $CDCl_3$ )  $\delta$  166.12, 161.98, 160.34, 153.26, 135.57, 131.43, 131.40, 129.78, 129.72, 126.20, 124.47, 124.45, 124.40, 124.37, 123.91, 123.81, 121.74, 121.16, 115.76, 115.62, 30.82.  **$^{19}F$  NMR** (376 MHz,  $CDCl_3$ )  $\delta$  -117.24. **HRMS** calcd. for  $C_{14}H_{11}FNS_2^+$   $[M+H]^+$ : 276.0312, Found: 276.0317.

**2-((3-fluorobenzyl)thio)benzothiazole (5m)**: The title compound was prepared according to

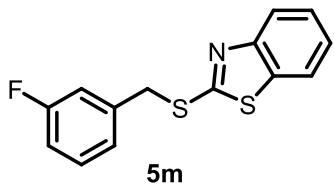

**5m**

General Procedure 7. The crude residue was purified by  $SiO_2$  plug (50% EtOAc/hexanes). Purification afforded **5m** as a yellow solid (268 mg, >95%).  **$^1H$  NMR** (600 MHz,  $CDCl_3$ )  $\delta$  7.90 (d,  $J$  = 8.1 Hz, 1H), 7.75 (d,  $J$  = 7.9 Hz, 1H), 7.43 (t,  $J$  = 7.7 Hz, 1H), 7.34–7.26 (m, 2H), 7.23 (d,  $J$  = 7.7 Hz, 1H), 7.22–7.17 (m, 1H), 6.97 (td,  $J$  = 8.5, 2.3 Hz, 1H), 4.59 (s, 2H).  **$^{13}C$  NMR** (150 MHz,  $CDCl_3$ )  $\delta$  165.83, 163.67, 162.03, 153.13, 139.05, 139.00, 135.45, 130.25, 130.19, 126.19, 126.18, 124.85, 124.84, 124.47, 121.68, 121.11, 116.25, 116.10, 114.85, 114.70, 37.04.  **$^{19}F$  NMR** (376 MHz,  $CDCl_3$ )  $\delta$  -113.09. **HRMS** calcd. for  $C_{14}H_{11}FNS_2^+$   $[M+H]^+$ : 276.0312, Found: 276.0335.

**2-((4-(trifluoromethoxy)benzyl)thio)benzothiazole (5n)**: The title compound was prepared

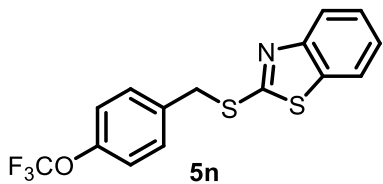

**5n**

according to General Procedure 7. The crude residue was purified by  $SiO_2$  gel column chromatography (20% EtOAc/hexanes). Purification afforded **5n** as a white solid (340 mg, >95%).  **$^1H$  NMR** (600 MHz,  $CDCl_3$ )  $\delta$  7.90 (d,  $J$  = 8.1 Hz, 1H), 7.76 (dd,  $J$  = 8.0, 1.1 Hz, 1H), 7.51–7.48 (m, 2H), 7.44 (ddd,  $J$  = 8.2, 7.3, 1.2 Hz, 1H), 7.34–7.28 (m, 1H), 7.17 (d,  $J$  = 8.2 Hz, 2H), 4.60 (s, 2H).  **$^{13}C$  NMR** (150 MHz,  $CDCl_3$ )  $\delta$  165.83,

153.17, 148.79, 148.78, 148.76, 148.75, 135.51, 135.41, 130.85, 130.67, 126.24, 126.06, 124.54, 123.11, 121.71, 121.41, 121.22, 121.17, 120.95, 119.70, 118.00, 36.76. **<sup>19</sup>F NMR** (376 MHz, CDCl<sub>3</sub>) δ -57.93. **HRMS** calcd. for C<sub>15</sub>H<sub>11</sub>F<sub>3</sub>NOS<sub>2</sub><sup>+</sup> [M+H]<sup>+</sup>: 342.0229, Found: 342.0256.

## Directing Group Optimization for C–H Functionalization

**Table S7.** Optimization of Directing Group in C–H Functionalization Reaction<sup>a</sup>

| Directing Group (DG) | Yield (IX) <sup>b</sup> | Directing Group (DG) | Yield (IX) <sup>b</sup> | Directing Group (DG) | Yield (IX) <sup>b</sup>       |
|----------------------|-------------------------|----------------------|-------------------------|----------------------|-------------------------------|
|                      | n.r. <sup>d</sup>       |                      | <15% <sup>c</sup>       |                      | n.r. <sup>d</sup>             |
|                      | <15% <sup>c</sup>       |                      | <15% <sup>c</sup>       |                      | <15% <sup>c</sup>             |
|                      | <15% <sup>c</sup>       |                      | n.r. <sup>d</sup>       |                      | 43%<br>(34%+9% <sup>b</sup> ) |
|                      | <15% <sup>c</sup>       |                      | 76%<br>(44% + 32%)      |                      | 69%<br>(40%+29%)              |
|                      | <15% <sup>c</sup>       |                      | n.r. <sup>d</sup>       |                      | 34%<br>(30%+4% <sup>b</sup> ) |

<sup>a</sup>Isolated yields except where otherwise noted. <sup>b</sup>Values inside of parentheses are yield of mono- and bis-functionalized products, respectively. Values outside of parentheses are combined yields of mono- and bis-functionalized products. <sup>c</sup>Determined by <sup>1</sup>H-NMR of the crude reaction using 1,3,5-trimethoxybenzene as internal standard. <sup>d</sup>n.r.=no reaction. <sup>e</sup>Starting material. <sup>f</sup>Product.

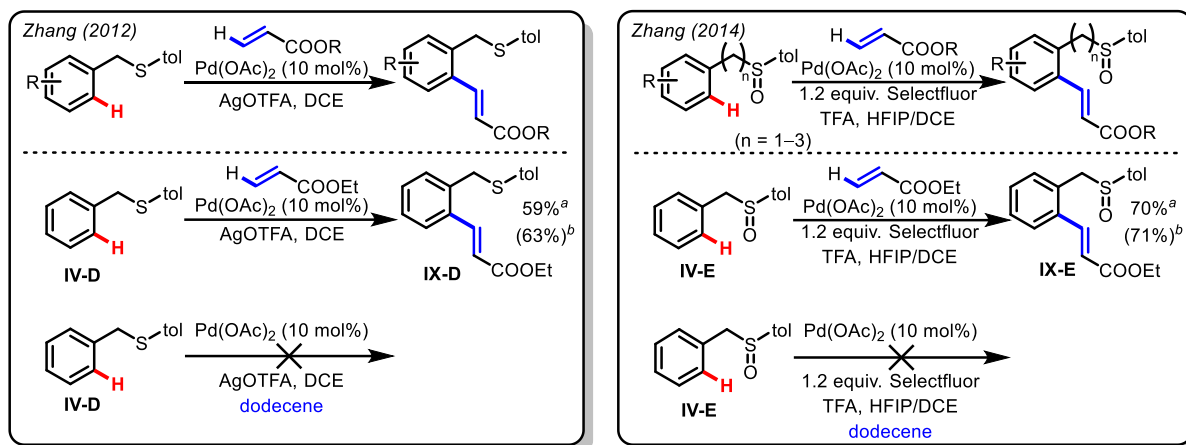

<sup>a</sup>Isolated Yield. <sup>b</sup>Determined by <sup>1</sup>H-NMR of the crude reaction using 1,3,5-trimethoxybenzene as internal standard.

**Scheme S7.** Comparative Reactivity of Dodecene Using Alternative Directing Groups<sup>12</sup>

## General Procedures for C–H Functionalization

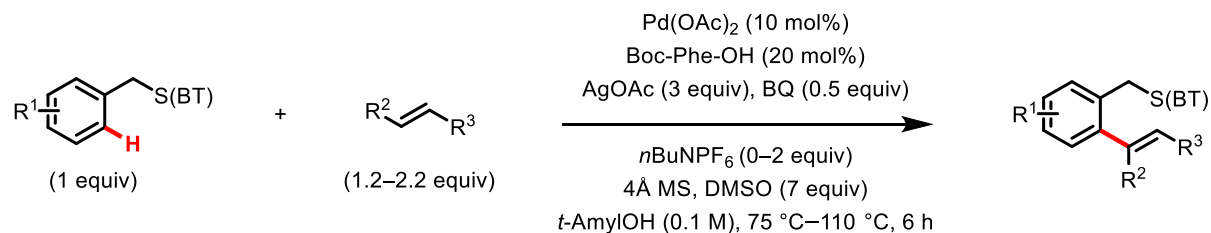

**Scheme S8.** General Procedure for C–H Functionalization.

**General Procedure for C–H Functionalization:** To a 1-dram (4 mL) vial equipped with magnetic stir bar were added arene (0.10 mmol, 1 equiv), alkene, silver acetate (0.30 mmol, 3 equiv) benzoquinone (0.05 mmol, 0.5 equiv), Boc-L-phenylalanine (0.02 mmol, 0.2 equiv), 4 Å molecular sieves (5 mg), DMSO (0.70 mmol, 7 equiv), Pd(OAc)<sub>2</sub> (0.01 mmol, 10 mol%), and *tert*-amyl alcohol (1 mL, 0.1 M). The reaction was placed on a hot plate that was pre-heated to the correct temperature. Except for when otherwise mentioned, after 6 h, the reaction was brought to room temperature. The organic materials were separated by addition of H<sub>2</sub>O (10 mL), followed by extraction with EtOAc (3 × 5 mL) and dried with Na<sub>2</sub>SO<sub>4</sub>. The solvent was removed *in vacuo*, and the crude residue was purified by SiO<sub>2</sub> gel column chromatography, preparative TLC, or mass-directed prep LC.

- **General Procedure 8:**

Alkene (0.12 mmol, 1.2 equiv), 75 °C

- **General Procedure 9:**

Alkene (0.12 mmol, 1.2 equiv), *n*BuNPF<sub>6</sub> (0.20 mmol, 2 equiv), 110 °C

- **General Procedure 10:**

Alkene (0.22 mmol, 2.2 equiv), 75 °C

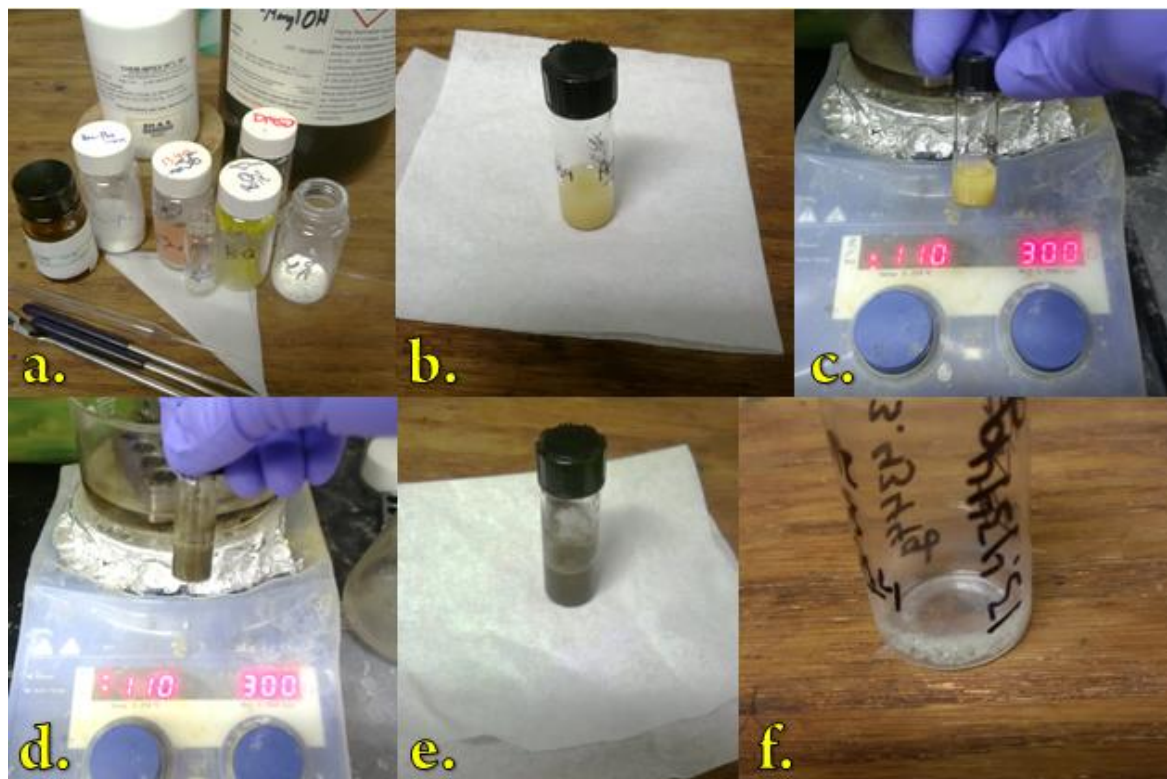

**Figure S7.** Photographic depiction of reaction setup according to General Procedure 9. From left to right: a) preparation of materials. b) reaction at 0 min before heating. c) vial being placed on hot plate. d) vial at 6 h after heating. e) crude reaction mixture after heating. f) pure product (**6a**)

### Characterization Data for C–H Functionalization Products

**2-(benzylthio)-5-(trifluoromethoxy)benzothiazole (IX-D):** The title compound was prepared following a literature procedure.<sup>12b</sup> Benzyl(*p*-tolyl)sulfane (**VIII-C**) (0.3 mmol, 1.0 equiv), ethyl acrylate (0.36 mmol, 1.2 equiv), Pd(OAc)<sub>2</sub> (6.7 mg, 10 mol%) and AgOTFA (0.6 mmol, 2.0 equiv) in DCE (2 mL, 0.15 M) were stirred at 100 ° C for 12 h. The organic materials were separated by addition of H<sub>2</sub>O (25 mL), followed by extraction with EtOAc (3 × 10 mL). The crude residue was purified by mass-directed prep LC. The crude material was purified on a Waters Autopurification LC with a Waters BEH C18 column (19×160 mm, 5 mm) using a 0.1% aqueous formic acid:acetonitrile gradient (30 mL/min, main segment of gradient at 65–95% acetonitrile over 8 min) at ambient temperature. Fractionation was triggered by a Waters QDa single quadrupole mass spec in ESI+ (*m/z* = 299.1 [M+H]), cone voltage 15V). Purification afforded **IX-D** as a colorless liquid (54 mg, 58%). <sup>1</sup>H NMR (600 MHz, CDCl<sub>3</sub>) δ 7.99 (d, *J* = 15.8 Hz, 1H), 7.59–7.52 (m, 1H), 7.29–7.24 (m, 2H), 7.24–7.22 (m, 2H), 7.21–7.17 (m, 1H), 7.06 (d, *J* = 7.7 Hz, 2H), 4.27 (q, *J* = 7.2 Hz, 2H), 4.14 (s, 2H), 2.31 (s, 3H), 1.35 (t, *J*

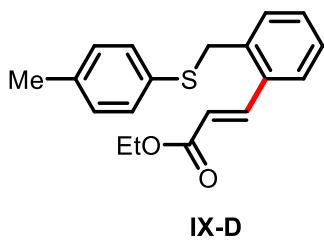

= 7.1 Hz, 3H).  $^{13}\text{C}$  NMR (150 MHz,  $\text{CDCl}_3$ )  $\delta$  166.28, 140.84, 136.97, 136.32, 133.20, 131.81, 131.02, 130.22, 129.41, 129.21, 127.31, 126.30, 119.59, 60.05, 37.61, 20.64, 13.89. HRMS calcd. for  $\text{C}_{19}\text{H}_{21}\text{O}_2\text{S}^+$   $[\text{M}+\text{H}]^+$ : 313.1257, Found: 312.1260.

**ethyl (E)-3-(2-((p-tolylsulfinyl)methyl)phenyl)acrylate (IX-E):** The title compound was prepared following a literature procedure.<sup>12a</sup> 1-(benzylsulfinyl)-4-methylbenzene

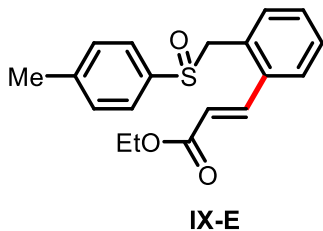

(**VIII-E**) (0.2 mmol, 1 equiv), ethyl acrylate (0.4 mmol, 2 equiv),  $\text{Pd}(\text{OAc})_2$  (4 mg, 10 mol%), TFA (2 mmol, 10 equiv) and Selectfluor (0.24 mmol, 1.2 equiv) in DCE (2 mL, 0.1 M) were stirred at 100 °C for 24 h. Afterward, the reaction mixture was allowed to cool to room temperature and filtered through a pad of Celite. The solvent was removed *in vacuo*. The crude residue was purified by preparative TLC (30% EtOAc/hexanes). Purification afforded **IX-E** as white solid (10 mg, 70%).  $^1\text{H}$  NMR (600 MHz,  $\text{CDCl}_3$ )  $\delta$  7.53 (d,  $J$  = 15.7 Hz, 1H), 7.50–7.46 (m, 1H), 7.34–7.29 (m, 2H), 7.21–7.10 (m, 5H), 6.07 (d,  $J$  = 15.6 Hz, 1H), 4.30–4.22 (m, 3H), 4.15 (d,  $J$  = 12.8 Hz, 1H), 2.37 (s, 3H), 1.35 (t,  $J$  = 7.1 Hz, 3H).  $^{13}\text{C}$  NMR (150 MHz,  $\text{CDCl}_3$ )  $\delta$  166.42, 142.18, 140.26, 139.12, 134.96, 132.65, 129.88, 129.77, 128.93, 128.55, 126.83, 124.58, 120.44, 60.70, 60.65, 21.56, 14.52. HRMS calcd. for  $\text{C}_{19}\text{H}_{21}\text{O}_3\text{S}^+$   $[\text{M}+\text{H}]^+$ : 329.1206, Found: 329.1218.

**ethyl (E)-3-(2-(1-phenyl-1H-tetrazol-5-yl)thio)methyl)phenyl)acrylate (IX-F):** The title compound was prepared according to General Procedure 8. The crude residue was purified by mass-directed prep LC. The crude material was purified on a Waters Autopurification LC with a Waters BEH C18 column (19×160 mm, 5 mm) using a 0.1% aqueous formic acid:acetonitrile gradient (30 mL/min, main segment of gradient at 55–75% acetonitrile over 8 min) at ambient temperature. Fractionation was triggered by a Waters QDa single quadrupole mass spec in ESI+ ( $m/z$  = 367.1  $[\text{M}+\text{H}]$ , cone voltage 15V). Purification afforded **IX-E** as a yellow solid (5 mg, 13%).  $^1\text{H}$  NMR (600 MHz,  $\text{CDCl}_3$ )  $\delta$  7.98 (d,  $J$  = 15.7 Hz, 1H), 7.58 (dd,  $J$  = 5.5, 3.7 Hz, 1H), 7.55–7.47 (m, 6H), 7.34 (dd,  $J$  = 5.7, 3.4 Hz, 2H), 6.38 (d,  $J$  = 15.7 Hz, 1H), 4.77 (s, 2H), 4.26 (q,  $J$  = 7.2 Hz, 2H), 1.32 (t,  $J$  = 7.1 Hz, 3H).  $^{13}\text{C}$  NMR (150 MHz,  $\text{CDCl}_3$ )  $\delta$  166.62, 153.68, 140.52, 134.20, 134.08, 133.68, 131.45, 130.43, 130.29, 129.93, 129.17, 127.34, 123.95, 121.54, 60.88, 35.43, 14.44. HRMS calcd. for  $\text{C}_{19}\text{H}_{19}\text{N}_4\text{O}_2\text{S}^+$   $[\text{M}+\text{H}]^+$ : 367.1223, Found: 367.1237.

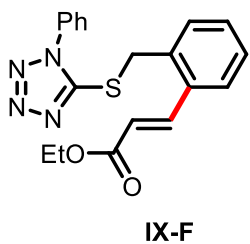

compound was prepared according to General Procedure 8. The crude residue was purified by mass-directed prep LC. The crude material was purified on a Waters Autopurification LC with a Waters BEH C18 column (19×160 mm, 5 mm) using a 0.1% aqueous formic acid:acetonitrile gradient (30 mL/min, main segment of gradient at 55–75% acetonitrile over 8 min) at ambient temperature. Fractionation was triggered by a Waters QDa single quadrupole mass spec in ESI+ ( $m/z$  = 367.1  $[\text{M}+\text{H}]$ , cone voltage 15V). Purification afforded **IX-E** as a yellow solid (5 mg, 13%).  $^1\text{H}$  NMR (600 MHz,  $\text{CDCl}_3$ )  $\delta$  7.98 (d,  $J$  = 15.7 Hz, 1H), 7.58 (dd,  $J$  = 5.5, 3.7 Hz, 1H), 7.55–7.47 (m, 6H), 7.34 (dd,  $J$  = 5.7, 3.4 Hz, 2H), 6.38 (d,  $J$  = 15.7 Hz, 1H), 4.77 (s, 2H), 4.26 (q,  $J$  = 7.2 Hz, 2H), 1.32 (t,  $J$  = 7.1 Hz, 3H).  $^{13}\text{C}$  NMR (150 MHz,  $\text{CDCl}_3$ )  $\delta$  166.62, 153.68, 140.52, 134.20, 134.08, 133.68, 131.45, 130.43, 130.29, 129.93, 129.17, 127.34, 123.95, 121.54, 60.88, 35.43, 14.44. HRMS calcd. for  $\text{C}_{19}\text{H}_{19}\text{N}_4\text{O}_2\text{S}^+$   $[\text{M}+\text{H}]^+$ : 367.1223, Found: 367.1237.

**ethyl (E)-3-(2-(5-chlorobenzothiazol-2-yl)thio)methyl)phenyl)acrylate (IX-L):** The title compound was prepared according to General Procedure 8. The crude residue was purified by preparative TLC (20% EtOAc/hexanes). Purification afforded **IX-L** as a yellow solid (13 mg, 34%).  $^1\text{H}$  NMR (600 MHz,  $\text{CDCl}_3$ )  $\delta$  8.13 (d,  $J$  = 15.7 Hz, 1H), 7.90 (d,  $J$  = 2.0 Hz, 1H), 7.64 (d,  $J$  = 8.5 Hz, 1H), 7.59 (dd,  $J$  = 7.3, 1.9 Hz, 1H), 7.51 (dd,  $J$  = 7.1, 1.8 Hz, 1H), 7.33 (pd,  $J$  = 7.4, 1.7 Hz, 2H), 7.28 (dd,  $J$  = 8.5, 2.1 Hz, 1H), 6.41 (d,  $J$  = 15.7 Hz, 1H), 4.74 (s, 2H), 4.24 (q,  $J$  = 7.2 Hz, 2H), 1.30 (t,  $J$  = 7.1 Hz,

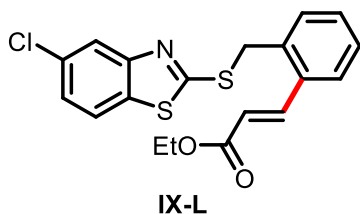

compound was prepared according to General Procedure 8. The crude residue was purified by preparative TLC (20% EtOAc/hexanes). Purification afforded **IX-L** as a yellow solid (13 mg, 34%).  $^1\text{H}$  NMR (600 MHz,  $\text{CDCl}_3$ )  $\delta$  8.13 (d,  $J$  = 15.7 Hz, 1H), 7.90 (d,  $J$  = 2.0 Hz, 1H), 7.64 (d,  $J$  = 8.5 Hz, 1H), 7.59 (dd,  $J$  = 7.3, 1.9 Hz, 1H), 7.51 (dd,  $J$  = 7.1, 1.8 Hz, 1H), 7.33 (pd,  $J$  = 7.4, 1.7 Hz, 2H), 7.28 (dd,  $J$  = 8.5,

2.1 Hz, 1H), 6.41 (d,  $J$  = 15.7 Hz, 1H), 4.74 (s, 2H), 4.24 (q,  $J$  = 7.2 Hz, 2H), 1.30 (t,  $J$  = 7.1 Hz,



3H).  $^{13}\text{C}$  NMR (150 MHz,  $\text{CDCl}_3$ )  $\delta$  168.17, 166.95, 154.19, 141.33, 135.38, 134.38, 134.00, 132.49, 131.40, 130.50, 128.89, 127.43, 125.05, 121.97, 121.87, 121.38, 60.99, 35.38, 14.62. **HRMS** calcd. for  $\text{C}_{19}\text{H}_{17}\text{ClNO}_2\text{S}_2^+$   $[\text{M}+\text{H}]^+$ : 390.0384, Found: 390.0388.

**ethyl (E)-3-(2-(5-chlorobenzothiazol-2-yl)thio)methylphenyl)acrylate (IX-M):** The title

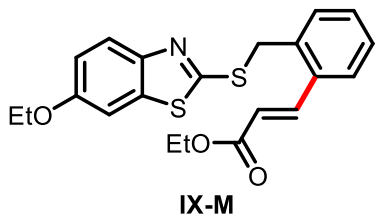

compound was prepared according to General Procedure 8. The crude residue was purified by preparative TLC (20% EtOAc/hexanes). Purification afforded **IX-M** as a yellow liquid (16 mg, 40%).  $^1\text{H}$  NMR (600 MHz,  $\text{CDCl}_3$ )  $\delta$  8.11 (d,  $J = 15.8$  Hz, 1H), 7.80 (d,  $J = 8.9$  Hz, 1H), 7.58 (dd,  $J = 7.0, 2.1$  Hz, 1H), 7.48 (dd,  $J = 7.2, 1.9$  Hz, 1H), 7.32 (tt,  $J = 7.5, 5.6$  Hz, 2H), 7.21 (d,  $J = 2.5$  Hz,

1H), 7.02 (dd,  $J = 8.9, 2.6$  Hz, 1H), 6.39 (d,  $J = 15.7$  Hz, 1H), 4.70 (s, 2H), 4.23 (q,  $J = 7.1$  Hz, 2H), 4.07 (q,  $J = 7.0$  Hz, 2H), 1.44 (t,  $J = 7.0$  Hz, 3H), 1.29 (t,  $J = 7.1$  Hz, 3H).  $^{13}\text{C}$  NMR (150 MHz,  $\text{CDCl}_3$ )  $\delta$  166.76, 162.27, 156.65, 147.75, 141.21, 136.95, 135.46, 134.17, 131.16, 130.25, 128.56, 127.19, 122.28, 121.08, 115.53, 104.93, 64.26, 60.74, 35.54, 14.97, 14.42. **HRMS** calcd. for  $\text{C}_{21}\text{H}_{22}\text{NO}_3\text{S}_2^+$   $[\text{M}+\text{H}]^+$ : 400.1036, Found: 400.1033.

**diethyl 3,3'-(2-(6-ethoxybenzothiazol-2-yl)thio)methyl)-1,3-phenylene)(2E,2'E)-diacrylate (IX-M')**

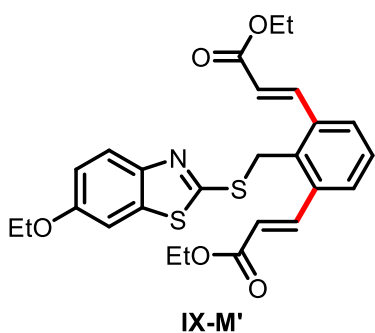

The title compound was prepared according to General Procedure 8. The crude residue was purified by preparative TLC (20% EtOAc/hexanes). Purification afforded **IX-M'** as a yellow solid (14 mg, 29%).  $^1\text{H}$  NMR (600 MHz,  $\text{CDCl}_3$ )  $\delta$  8.16 (d,  $J = 15.7$  Hz, 2H), 7.83 (d,  $J = 8.9$  Hz, 1H), 7.57 (d,  $J = 7.8$  Hz, 2H), 7.35 (t,  $J = 7.8$  Hz, 1H), 7.22 (d,  $J = 2.5$  Hz, 1H), 7.03 (dd,  $J = 8.9, 2.5$  Hz, 1H), 6.36 (d,  $J = 15.7$  Hz, 2H), 4.82 (s, 2H), 4.22 (q,  $J = 7.2$  Hz, 4H), 4.08 (q,  $J = 6.9$  Hz, 2H), 1.45 (t,  $J = 7.0$  Hz, 3H), 1.27 (t,  $J = 7.2$  Hz, 6H).  $^{13}\text{C}$  NMR (150 MHz,  $\text{CDCl}_3$ )  $\delta$  161.55, 156.72, 147.75, 141.42,

137.11, 135.83, 133.76, 128.83, 128.75, 122.51, 115.59, 104.89, 64.27, 60.83, 29.85, 14.98, 14.38. **HRMS** calcd. for  $\text{C}_{26}\text{H}_{28}\text{NO}_5\text{S}_2^+$   $[\text{M}+\text{H}]^+$ : 498.1403, Found: 498.1409.

**ethyl (E)-3-(2-(5-(trifluoromethoxy)benzothiazol-2-yl)thio)methylphenyl)acrylate (IX-N):**

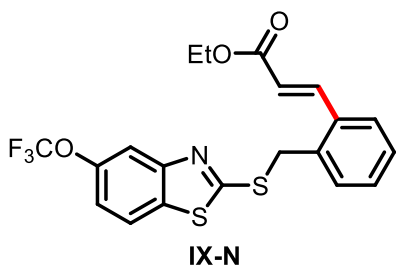

The title compound was prepared according to General Procedure 8. The crude residue was purified by preparative TLC (20% EtOAc/hexanes). Purification afforded **IX-N** as a yellow solid (13 mg, 30%).  $^1\text{H}$  NMR (600 MHz,  $\text{CDCl}_3$ )  $\delta$  8.13 (d,  $J = 15.7$  Hz, 1H), 7.80 (dd,  $J = 2.4, 1.2$  Hz, 1H), 7.73 (d,  $J = 8.7$  Hz, 1H), 7.60 (dd,  $J = 7.4, 1.8$  Hz, 1H), 7.51 (dd,  $J = 7.2, 1.8$  Hz, 1H), 7.34 (pd,  $J = 7.4, 1.7$  Hz, 2H), 7.22–7.16 (m, 1H), 6.41 (d,  $J = 15.8$  Hz, 1H),

4.76 (s, 2H), 4.24 (q,  $J = 7.1$  Hz, 2H), 1.29 (t,  $J = 7.1$  Hz, 3H).  $^{13}\text{C}$  NMR (150 MHz,  $\text{CDCl}_3$ )  $\delta$  168.80, 166.74, 153.82, 148.01, 141.10, 135.07, 134.20, 133.85, 131.20, 130.32, 128.73, 127.25,

123.25, 121.75, 121.55, 121.20, 119.85, 118.14, 117.94, 114.29, 60.78, 35.20, 14.38.  $^{19}\text{F}$  NMR (376 MHz,  $\text{CDCl}_3$ )  $\delta$  -58.98. HRMS calcd. for  $\text{C}_{20}\text{H}_{17}\text{F}_3\text{NO}_3\text{S}_2^+$   $[\text{M}+\text{H}]^+$ : 440.0597, Found: 440.0601.

**diethyl 3,3'-(2-(5-(trifluoromethoxy)benzothiazol-2-yl)thio)methyl)-1,3-phenylene(2E,2'E)-diacrylate (IX-N')**: The title compound was prepared according to General Procedure 8. The crude

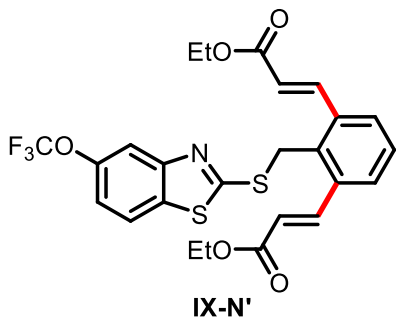

residue was purified by preparative TLC (20% EtOAc/hexanes). Purification afforded IX-N' as a yellow solid (2.0 mg, 4%).  $^1\text{H}$  NMR (600 MHz,  $\text{CDCl}_3$ )  $\delta$  8.19 (d,  $J$  = 15.7 Hz, 2H), 7.90–7.83 (m, 1H), 7.74 (d,  $J$  = 8.7 Hz, 1H), 7.59 (d,  $J$  = 7.8 Hz, 2H), 7.37 (t,  $J$  = 7.8 Hz, 1H), 7.20 (dd,  $J$  = 8.8, 2.3 Hz, 1H), 6.39 (d,  $J$  = 15.7 Hz, 2H), 4.90 (s, 2H), 4.23 (q,  $J$  = 7.1 Hz, 4H), 1.27 (t,  $J$  = 7.1 Hz, 6H).  $^{13}\text{C}$  NMR (150 MHz,  $\text{CDCl}_3$ )  $\delta$  168.17, 166.46, 153.76, 148.05, 141.32, 135.84, 133.93, 133.42, 128.92, 128.88, 122.63, 121.75, 121.56, 119.86, 118.04, 114.51, 60.87, 31.54, 14.35.  $^{19}\text{F}$  NMR (376 MHz,  $\text{CDCl}_3$ )  $\delta$  -58.98. HRMS calcd. for  $\text{C}_{25}\text{H}_{22}\text{F}_3\text{NO}_5\text{S}_2^+$   $[\text{M}+\text{H}]^+$ : 538.0964, Found: 538.0977.

**ethyl (E)-3-(2-((benzothiazol-2-ylthio)methyl)-3,4-dimethoxyphenyl)acrylate (6a)**: The title

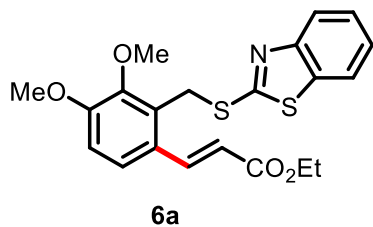

compound was prepared according to General Procedure 9 on a 9.0 mmol scale. The crude residue was purified by  $\text{SiO}_2$  gel column chromatography (20% EtOAc/hexanes). Purification afforded 6a as a yellow liquid (3.71 g, >95%).  $^1\text{H}$  NMR (600 MHz,  $\text{CDCl}_3$ )  $\delta$  8.13 (d,  $J$  = 15.7 Hz, 1H), 7.96 (dt,  $J$  = 8.0, 0.9 Hz, 1H), 7.76 (dt,  $J$  = 7.9, 0.9 Hz, 1H), 7.43 (ddd,  $J$  = 8.3, 7.2, 1.2 Hz, 1H), 7.36 (d,  $J$  = 8.7 Hz, 1H), 7.30 (ddd,  $J$  = 8.2, 7.3, 1.2 Hz, 1H), 6.91 (d,  $J$  = 8.7 Hz, 1H), 6.29 (d,  $J$  = 15.7 Hz, 1H), 4.85 (s, 2H), 4.19 (q,  $J$  = 7.1 Hz, 2H), 3.93 (s, 3H), 3.91 (s, 3H), 1.24 (t,  $J$  = 7.1 Hz, 3H).  $^{13}\text{C}$  NMR (150 MHz,  $\text{CDCl}_3$ )  $\delta$  166.96, 166.36, 154.08, 153.34, 148.08, 141.33, 135.57, 129.56, 127.54, 126.17, 124.40, 123.08, 121.86, 121.10, 119.28, 112.38, 61.54, 60.55, 55.97, 29.08, 14.41. HRMS calcd. for  $\text{C}_{21}\text{H}_{22}\text{NO}_4\text{S}_2^+$   $[\text{M}+\text{H}]^+$ : 416.0985, Found: 416.0991.

**ethyl (E)-3-(2-((benzothiazol-2-ylthio)methyl)-4-methylphenyl)acrylate (6b) and ethyl (E)-3-((benzothiazol-2-ylthio)methyl)-6-methylphenyl)acrylate (6b')**:

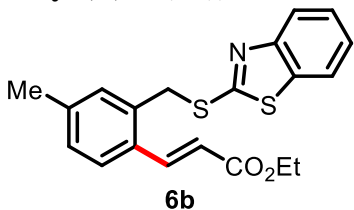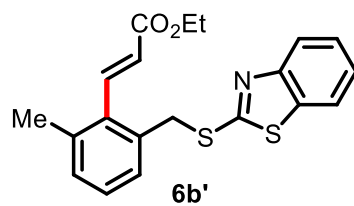

The title compound was prepared according to General Procedure 10. The crude residue was purified by preparative TLC (20% EtOAc/hexanes). Purification afforded a 2:1 mixture of (6b) and (6b') as an orange solid (15.1 mg, 41%). In this case, it was possible to distinguish NMR peaks corresponding to each of the isomers, so their data are reported separately. (6b):  $^1\text{H}$  NMR (600 MHz,  $\text{CDCl}_3$ )  $\delta$  8.09 (d,  $J$  = 15.7 Hz, 1H), 7.95–7.90 (m, 1H), 7.78–7.73 (m, 1H), 7.50 (d,  $J$  = 8.0 Hz, 1H), 7.47–7.10 (m, 4H), 6.37 (d,  $J$  = 15.8 Hz, 1H), 4.73 (s, 2H), 4.22 (q,  $J$  = 7.1 Hz, 2H), 2.34 (s, 3H), 1.28 (t,  $J$  = 7.2 Hz, 3H).  $^{13}\text{C}$  NMR (150 MHz,  $\text{CDCl}_3$ )  $\delta$  166.94, 165.91, 153.25, 142.44,

141.05, 140.70, 135.54, 135.10, 131.90, 129.51, 127.13, 126.21, 124.49, 121.76, 121.16, 120.04, 60.66, 35.29, 21.44, 14.43. **(6b')**:  $^1\text{H NMR}$  (600 MHz,  $\text{CDCl}_3$ )  $\delta$  8.09 (d,  $J = 15.7$  Hz, 1H), 7.95–7.90 (m, 1H), 7.78–7.73 (m, 1H), 7.50 (d,  $J = 8.0$  Hz, 1H), 7.47–7.10 (m, 4H), 6.17 (d,  $J = 16.3$  Hz, 1H), 4.66 (s, 2H), 4.18 (q,  $J = 6.9$  Hz, 2H), 2.33 (s, 3H), 1.26 (t,  $J = 7.1$  Hz, 3H).  $^{13}\text{C NMR}$  (150 MHz,  $\text{CDCl}_3$ )  $\delta$  166.33, 166.22, 153.25, 137.09, 135.54, 135.10, 134.22, 131.32, 130.21, 128.58, 128.43, 125.46, 124.45, 121.71, 121.16, 120.04, 60.79, 36.12, 21.06, 14.34. **HRMS** calcd. for  $\text{C}_{20}\text{H}_{20}\text{NO}_2\text{S}_2^+$   $[\text{M}+\text{H}]^+$ : 370.0930, Found: 370.0937.

**diethyl 3,3'-(2-((benzothiazol-2-ylthio)methyl)-4-methyl-1,3-phenylene)(2E,2'E)-diacrylate (6b'')**: The title compound was prepared according to General Procedure 10. The crude residue was

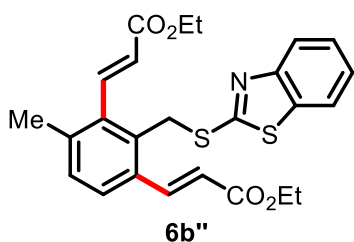

purified by preparative TLC (20% EtOAc/hexanes). Purification afforded **6b''** as a yellow solid (15 mg, 32%).  $^1\text{H NMR}$  (600 MHz,  $\text{CDCl}_3$ )  $\delta$  8.12 (d,  $J = 15.7$  Hz, 1H), 7.94–7.88 (m, 2H), 7.77–7.74 (m, 1H), 7.48 (d,  $J = 8.0$  Hz, 1H), 7.43 (ddd,  $J = 8.3, 7.3, 1.2$  Hz, 1H), 7.31 (ddd,  $J = 8.2, 7.3, 1.2$  Hz, 1H), 7.21 (d,  $J = 8.0$  Hz, 1H), 6.36 (d,  $J = 15.7$  Hz, 1H), 6.15 (d,  $J = 16.3$  Hz, 1H), 4.79 (s, 2H), 4.18 (q,  $J = 7.1$

Hz, 2H), 4.13 (q,  $J = 7.2$  Hz, 2H), 2.32 (s, 3H), 1.23 (t,  $J = 7.1$  Hz, 3H), 1.20 (t,  $J = 7.2$  Hz, 3H).  $^{13}\text{C NMR}$  (150 MHz,  $\text{CDCl}_3$ )  $\delta$  166.66, 166.03, 165.46, 153.20, 142.30, 141.39, 138.88, 136.80, 135.56, 133.02, 132.59, 130.54, 127.01, 126.23, 126.20, 124.51, 121.85, 121.25, 121.12, 60.84, 60.71, 32.96, 21.24, 14.35, 14.25. **HRMS** calcd. for  $\text{C}_{25}\text{H}_{26}\text{NO}_4\text{S}_2^+$   $[\text{M}+\text{H}]^+$ : 468.1298, Found: 468.1306.

**ethyl (E)-3-(2-((benzothiazol-2-ylthio)methyl)phenyl)acrylate (6c)**: The title compound was

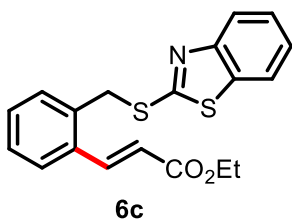

prepared on a 3.885 mmol scale according to General Procedure 8. The crude residue was purified by  $\text{SiO}_2$  gel column chromatography (20% EtOAc/hexanes). Purification afforded **6c** as a white solid (605 mg, 44%).  $^1\text{H NMR}$  (600 MHz,  $\text{CDCl}_3$ )  $\delta$  8.13 (d,  $J = 15.7$  Hz, 1H), 7.92 (d,  $J = 8.0$  Hz, 1H), 7.75 (dd,  $J = 8.1, 1.2$  Hz, 1H), 7.59 (dd,  $J = 7.1, 2.0$  Hz, 1H), 7.52 (dd,  $J = 7.0, 2.0$  Hz, 1H), 7.43 (ddd,  $J = 8.3, 7.3, 1.2$  Hz, 1H), 7.36–7.29

(m, 3H), 6.41 (d,  $J = 15.7$  Hz, 1H), 4.76 (s, 2H), 4.23 (q,  $J = 7.1$  Hz, 2H), 1.29 (t,  $J = 7.1$  Hz, 3H).  $^{13}\text{C NMR}$  (150 MHz,  $\text{CDCl}_3$ )  $\delta$  166.68, 165.68, 153.15, 141.12, 135.50, 135.27, 134.13, 131.13, 130.22, 128.55, 127.15, 126.16, 124.47, 121.72, 121.12, 121.09, 60.68, 35.18, 14.37. **HRMS** calcd. for  $\text{C}_{19}\text{H}_{18}\text{NO}_2\text{S}_2^+$   $[\text{M}+\text{H}]^+$ : 356.0774, Found: 356.0780.

**diethyl 3,3'-(2-((benzothiazol-2-ylthio)methyl)-1,3-phenylene)(2E,2'E)-diacrylate (6c')**: The

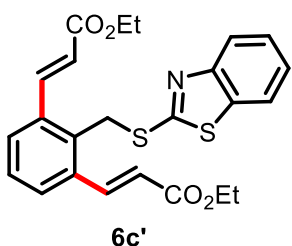

title compound was prepared on a 3.885 mmol scale according to General Procedure 8. The crude residue was purified by  $\text{SiO}_2$  gel column chromatography (20% EtOAc/hexanes). Purification afforded **6c'** as a white solid (575 mg, 33%).  $^1\text{H NMR}$  (600 MHz,  $\text{CDCl}_3$ )  $\delta$  8.18 (d,  $J = 15.7$  Hz, 2H), 7.97 (dt,  $J = 8.1, 0.9$  Hz, 1H), 7.76 (dt,  $J = 7.9, 0.8$  Hz, 1H), 7.58 (d,  $J = 7.8$  Hz, 2H), 7.44 (ddd,  $J = 8.2, 7.3, 1.2$  Hz, 1H), 7.36 (t,  $J = 7.8$  Hz, 1H), 7.31 (ddd,  $J = 8.2, 7.3, 1.2$  Hz, 1H), 6.38 (d,  $J = 15.7$  Hz, 2H), 4.88 (s,

2H), 4.21 (q,  $J = 7.2$  Hz, 4H), 1.26 (t,  $J = 7.1$  Hz, 6H).  $^{13}\text{C NMR}$  (150 MHz,  $\text{CDCl}_3$ )  $\delta$  166.45, 165.09, 153.18, 141.38, 135.87, 135.65, 133.58, 128.85, 128.81, 126.24, 124.60, 122.60, 121.97, 121.16, 60.83, 31.64, 14.37. **HRMS** calcd. for  $\text{C}_{24}\text{H}_{24}\text{NO}_4\text{S}_2^+$   $[\text{M}+\text{H}]^+$ : 454.1141, Found: 454.1147. **X-ray** (single-crystal) Colorless blocks of X-ray diffraction quality were obtained by vapor diffusion of ether into a saturated solution of **6c'** in acetonitrile (CCDC 1905653).<sup>23</sup>

**ethyl (E)-3-(2-((benzothiazol-2-ylthio)methyl)-3-chlorophenyl)acrylate (6d):** The title

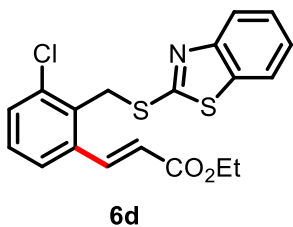

compound was prepared according to General Procedure 10 with a reaction time of 24 h. The crude residue was purified by mass-directed prep LC. The crude material was purified on a Waters Autopurification LC with a Waters BEH C18 column (19×160 mm, 5 mm) using a 0.1% aqueous formic acid:acetonitrile gradient (30 mL/min, main segment of gradient at 65–95% acetonitrile over 8 min) at ambient temperature. Fractionation was

triggered by a Waters QDa single quadrupole mass spec in ESI+ ( $m/z = 390.0$   $[\text{M}+\text{H}]$ , cone voltage 15V). Purification afforded **6d** as a brown solid (28 mg, 71%).  $^1\text{H NMR}$  (600 MHz,  $\text{CDCl}_3$ )  $\delta$  8.29 (d,  $J = 15.7$  Hz, 1H), 7.99 (dt,  $J = 8.1, 0.8$  Hz, 1H), 7.76 (dt,  $J = 8.0, 0.8$  Hz, 1H), 7.48–7.42 (m, 3H), 7.31 (ddd,  $J = 8.2, 7.3, 1.2$  Hz, 1H), 7.27 (t,  $J = 7.9$  Hz, 1H), 6.34 (d,  $J = 15.7$  Hz, 1H), 4.93 (s, 2H), 4.21 (q,  $J = 7.2$  Hz, 2H), 1.26 (t,  $J = 7.1$  Hz, 3H).  $^{13}\text{C NMR}$  (150 MHz,  $\text{CDCl}_3$ )  $\delta$  166.34, 165.58, 153.21, 141.46, 136.86, 136.29, 135.72, 133.11, 131.13, 129.31, 126.22, 125.94, 124.54, 122.80, 121.99, 121.13, 60.83, 32.52, 14.38. **HRMS** calcd. for  $\text{C}_{19}\text{H}_{17}\text{ClNO}_2\text{S}_2^+$   $[\text{M}+\text{H}]^+$ : 390.0384, Found: 390.0391. **X-ray** (single-crystal) Brown blocks of X-ray diffraction quality were obtained by vapor diffusion of ether into a saturated solution of **6d** in acetonitrile (CCDC 1905643).<sup>23</sup>

**ethyl (E)-3-(2-((benzothiazol-2-ylthio)methyl)-5-isopropylphenyl)acrylate (6e):** The title

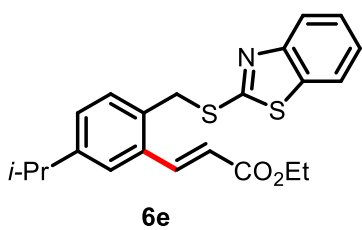

compound was prepared according to General Procedure 10. The crude residue was purified by preparative TLC (20% EtOAc/hexanes). Purification afforded **6e** as a yellow solid (16.7 mg, 42%).  $^1\text{H NMR}$  (600 MHz,  $\text{CDCl}_3$ )  $\delta$  8.12 (d,  $J = 15.7$  Hz, 1H), 7.92 (dt,  $J = 8.1, 0.8$  Hz, 1H), 7.75 (dt,  $J = 8.1, 0.9$  Hz, 1H), 7.46–7.40 (m, 3H), 7.30 (ddd,  $J = 8.2, 7.3, 1.2$  Hz, 1H), 7.21 (dd,  $J = 7.9, 1.9$  Hz,

1H), 6.42 (d,  $J = 15.8$  Hz, 1H), 4.73 (s, 2H), 4.23 (q,  $J = 7.2$  Hz, 2H), 2.90 (p,  $J = 6.9$  Hz, 1H), 1.29 (t,  $J = 7.1$  Hz, 3H), 1.25 (d,  $J = 6.9$  Hz, 6H).  $^{13}\text{C NMR}$  (150 MHz,  $\text{CDCl}_3$ )  $\delta$  166.84, 166.03, 153.25, 149.34, 141.54, 135.53, 134.00, 132.64, 131.24, 128.66, 126.19, 125.24, 124.47, 121.75, 121.16, 120.79, 60.71, 35.07, 34.03, 23.95, 14.42. **HRMS** calcd. for  $\text{C}_{22}\text{H}_{24}\text{NO}_2\text{S}_2^+$   $[\text{M}+\text{H}]^+$ : 398.1243, Found: 398.1246. **X-ray** (single-crystal) Yellow blocks of X-ray diffraction quality were obtained by vapor diffusion of ether into a saturated solution of **6e** in acetonitrile (CCDC 1905647).<sup>23</sup>

**diethyl 3,3'-(2-((benzothiazol-2-ylthio)methyl)-5-isopropyl-1,3-phenylene)(2*E*,2'*E*)-diacrylate (6e')**: The title compound was prepared according to General Procedure 10. The crude residue was

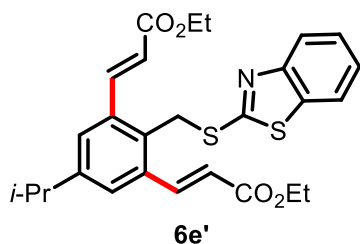

purified by preparative TLC (20% EtOAc/hexanes). Purification afforded **6e'** as a yellow solid (14 mg, 28%). <sup>1</sup>H NMR (600 MHz, CDCl<sub>3</sub>) δ 8.17 (d, *J* = 15.7 Hz, 2H), 7.96 (d, *J* = 8.1 Hz, 1H), 7.78–7.74 (m, 1H), 7.47–7.41 (m, 3H), 7.34–7.29 (m, 1H), 6.39 (d, *J* = 15.7 Hz, 2H), 4.85 (s, 2H), 4.22 (q, *J* = 7.2 Hz, 4H), 2.92 (p, *J* = 6.9 Hz, 1H), 1.30–1.23 (m, 12H). <sup>13</sup>C NMR (150 MHz, CDCl<sub>3</sub>) δ 166.53, 165.34, 153.21, 149.44, 141.75, 135.76, 135.61, 130.99, 127.15, 126.22, 124.56, 122.26, 121.94, 121.14, 60.80, 34.09, 31.53, 23.86, 14.38. HRMS calcd. for C<sub>27</sub>H<sub>30</sub>NO<sub>4</sub>S<sub>2</sub><sup>+</sup> [M+H]<sup>+</sup>: 496.1611, Found: 496.1610.

**ethyl (E)-3-(2-((benzothiazol-2-ylthio)methyl)-3-methylphenyl)acrylate (6f)**: The title

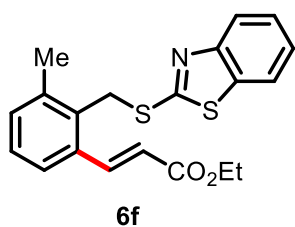

compound was prepared according to General Procedure 8. The crude residue was purified by mass-directed prep LC. The crude material was purified on a Waters Autopurification LC with a Waters BEH C18 column (19×160 mm, 5 mm) using a 0.1% aqueous formic acid:acetonitrile gradient (30 mL/min, main segment of gradient at 65–95% acetonitrile over 8 min) at ambient temperature. Fractionation was triggered by a

Waters QDa single quadrupole mass spec in ESI+ (*m/z* = 370.1 [M+H], cone voltage 15V). Purification afforded **6f** as a yellow solid (26 mg, 69%). <sup>1</sup>H NMR (600 MHz, CDCl<sub>3</sub>) δ 8.16 (d, *J* = 15.7 Hz, 1H), 7.94 (d, *J* = 8.1 Hz, 1H), 7.77 (d, *J* = 7.5 Hz, 1H), 7.47–7.41 (m, 2H), 7.34–7.29 (m, 1H), 7.24 (d, *J* = 5.4 Hz, 2H), 6.37 (d, *J* = 15.7 Hz, 1H), 4.79 (s, 2H), 4.21 (q, *J* = 7.1 Hz, 2H), 2.49 (s, 3H), 1.26 (t, *J* = 7.1 Hz, 3H). <sup>13</sup>C NMR (150 MHz, CDCl<sub>3</sub>) δ 166.74, 166.15, 153.30, 142.02, 138.63, 135.51, 135.15, 132.58, 132.37, 128.46, 126.23, 125.27, 124.53, 121.79, 121.63, 121.18, 60.69, 32.36, 19.96, 14.39. HRMS calcd. for C<sub>20</sub>H<sub>20</sub>NO<sub>2</sub>S<sub>2</sub><sup>+</sup> [M+H]<sup>+</sup>: 370.0930, Found: 370.0937.

**ethyl (E)-3-(2-((benzothiazol-2-ylthio)methyl)-4-fluoro-3-methylphenyl)acrylate (6g)**: The title

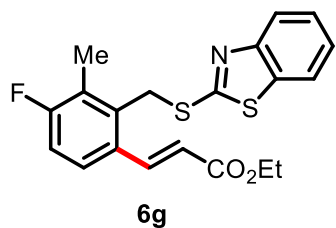

compound was prepared according to General Procedure 8. The crude residue was purified by preparative TLC (20% EtOAc/hexanes). Purification afforded **6g** as a yellow solid (25 mg, 64%). <sup>1</sup>H NMR (600 MHz, CDCl<sub>3</sub>) δ 8.10 (d, *J* = 15.7 Hz, 1H), 7.94 (d, *J* = 8.1 Hz, 1H), 7.77 (dd, *J* = 8.0, 1.2 Hz, 1H), 7.47–7.39 (m, 2H), 7.35–7.30 (m, 1H), 7.02 (t, *J* = 8.8 Hz, 1H), 6.31 (d, *J* = 15.6 Hz, 1H), 4.79 (s, 2H), 4.21 (q, *J* =

7.2 Hz, 2H), 2.38 (d, *J* = 2.2 Hz, 3H), 1.26 (t, *J* = 7.1 Hz, 3H). <sup>13</sup>C NMR (150 MHz, CDCl<sub>3</sub>) δ 165.53, 163.01, 161.36, 153.21, 141.26, 141.25, 135.54, 135.32, 135.29, 131.04, 131.02, 126.34, 126.28, 125.68, 125.57, 124.63, 121.84, 121.26, 121.25, 121.20, 115.63, 115.48, 60.72, 32.16, 14.39, 11.09. <sup>19</sup>F NMR (376 MHz, CDCl<sub>3</sub>) δ -111.79. HRMS calcd. for C<sub>20</sub>H<sub>19</sub>FNO<sub>2</sub>S<sub>2</sub><sup>+</sup> [M+H]<sup>+</sup>: 388.0836, Found: 388.0837. X-ray (single-crystal) Yellow blocks of X-ray diffraction quality were obtained by vapor diffusion of ether into a saturated solution of **6g** in acetonitrile (CCDC 1905650).<sup>23</sup>

**ethyl (*E*)-3-(2-((benzothiazol-2-ylthio)methyl)-4-(difluoromethoxy)phenyl)acrylate (6h):** The

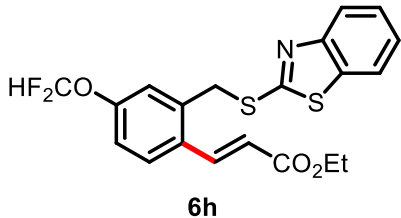

title compound was prepared according to General Procedure 8. The crude residue was purified by preparative TLC (20% EtOAc/hexanes). Purification afforded **6h** as a yellow solid (22.7 mg, 54%). <sup>1</sup>H NMR (600 MHz, CDCl<sub>3</sub>) δ 8.28 (d, *J* = 15.8 Hz, 1H), 7.97 (dt, *J* = 8.1, 0.8 Hz, 1H), 7.80–7.71 (m, 1H), 7.46–7.40 (m, 2H), 7.36–7.29 (m, 2H), 7.20 (dd, *J* = 8.2, 1.2 Hz, 1H), 6.58

(t, *J* = 73.3 Hz, 1H), 6.37 (d, *J* = 15.7 Hz, 1H), 4.83 (s, 2H), 4.21 (q, *J* = 7.1 Hz, 2H), 1.26 (t, *J* = 7.1 Hz, 3H). <sup>13</sup>C NMR (150 MHz, CDCl<sub>3</sub>) δ 166.40, 165.54, 153.20, 150.48, 150.46, 150.44, 140.97, 136.73, 135.70, 129.34, 127.40, 126.23, 124.54, 124.10, 122.60, 121.95, 121.13, 119.87, 117.85, 116.12, 114.39, 60.84, 28.71, 14.38. <sup>19</sup>F NMR (376 MHz, CDCl<sub>3</sub>) δ -80.49. HRMS calcd. for C<sub>20</sub>H<sub>18</sub>F<sub>2</sub>NO<sub>3</sub>S<sub>2</sub><sup>+</sup> [M+H]<sup>+</sup>: 422.0691, Found: 422.0693.

**ethyl (*E*)-3-(1-((benzothiazol-2-ylthio)methyl)naphthalen-2-yl)acrylate (6i):** The title compound

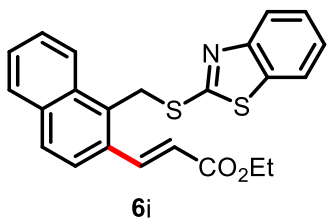

was prepared according to General Procedure 8. The crude residue was purified by preparative TLC (20% EtOAc/hexanes). Purification afforded **6i** as a yellow solid (20.4 mg, 50%). <sup>1</sup>H NMR (600 MHz, CDCl<sub>3</sub>) δ 8.40 (d, *J* = 15.7 Hz, 1H), 8.24–8.21 (m, 1H), 8.00 (dt, *J* = 8.1, 0.8 Hz, 1H), 7.88–7.84 (m, 1H), 7.82 (d, *J* = 8.7 Hz, 1H), 7.78 (dt, *J* = 8.0, 0.8 Hz, 1H), 7.67 (d, *J* = 8.7 Hz, 1H), 7.59 (ddd, *J* = 8.5, 6.8, 1.5

Hz, 1H), 7.54 (ddd, *J* = 7.9, 6.8, 1.2 Hz, 1H), 7.47 (ddd, *J* = 8.3, 7.3, 1.3 Hz, 1H), 7.34 (ddd, *J* = 8.2, 7.4, 1.2 Hz, 1H), 6.52 (d, *J* = 15.7 Hz, 1H), 5.30 (s, 2H), 4.26 (q, *J* = 7.1 Hz, 2H), 1.30 (t, *J* = 7.1 Hz, 3H). <sup>13</sup>C NMR (150 MHz, CDCl<sub>3</sub>) δ 166.79, 166.04, 153.27, 141.63, 135.59, 134.44, 132.21, 132.12, 131.09, 129.35, 128.95, 127.59, 127.22, 126.27, 124.61, 124.58, 123.93, 122.08, 121.87, 121.22, 60.80, 31.04, 14.44. HRMS calcd. for C<sub>23</sub>H<sub>20</sub>NO<sub>2</sub>S<sub>2</sub><sup>+</sup> [M+H]<sup>+</sup>: 406.0930, Found: 406.0934.

**ethyl (*E*)-3-(3-((benzothiazol-2-ylthio)methyl)naphthalen-2-yl)acrylate (6j) and ethyl (*E*)-3-(2-((benzothiazol-2-ylthio)methyl)naphthalen-1-yl)acrylate (6j')**: The title compound was prepared

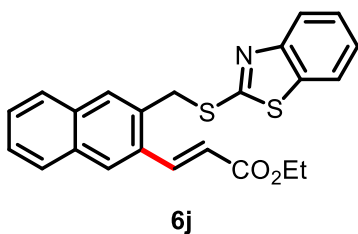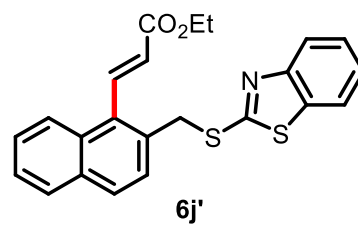

according to General Procedure 8. The crude residue was purified by preparative TLC (20% EtOAc/hexanes). Purification afforded a 5:3 ratio of (**6j**) to (**6j'**) as a yellow liquid (15.4 mg, 38%). Because all of the peaks belonging to each of the two isomers could not be clearly resolved, the analytical data below correspond to the mixture: <sup>1</sup>H NMR (600 MHz, CDCl<sub>3</sub>) δ 8.32 (d, *J* = 16.2 Hz, 1H), 8.20 (d, *J* = 15.7 Hz, 2H), 8.09 (s, 2H), 8.03–7.98 (m, 3H), 7.94 (dd, *J* = 8.1, 3.5 Hz, 3H), 7.85–7.76 (m, 6H), 7.75 (d, *J* = 7.9 Hz, 2H), 7.65 (d, *J* = 8.5 Hz, 1H), 7.54–7.47 (m, 5H), 7.44 (ddt, *J* = 9.4, 8.2, 1.6 Hz, 3H), 7.33–7.28 (m, 3H), 6.55 (d, *J* = 15.7 Hz, 2H), 6.34 (d, *J* = 16.3 Hz, 1H), 4.91 (s, 3H), 4.83 (s, 2H), 4.28 (q, *J* = 7.2 Hz, 2H), 4.23 (q, *J* = 7.1 Hz, 3H), 1.33 (t, *J* = 7.2 Hz, 3H), 1.28 (t, *J* = 7.1 Hz, 5H). <sup>13</sup>C NMR

(150 MHz, CDCl<sub>3</sub>)  $\delta$  166.69, 166.21, 165.98, 165.75, 153.24, 153.21, 141.73, 141.61, 135.58, 135.54, 133.88, 133.00, 132.95, 132.92, 132.27, 132.12, 131.65, 131.50, 130.19, 129.24, 128.47, 128.30, 127.88, 127.71, 127.50, 127.34, 127.08, 127.01, 126.51, 126.22, 125.43, 124.51, 124.50, 121.76, 121.48, 121.18, 121.17, 60.95, 60.75, 36.20, 35.90, 14.41, 14.40. **HRMS** calcd. for C<sub>23</sub>H<sub>20</sub>NO<sub>2</sub>S<sub>2</sub><sup>+</sup> [M+H]<sup>+</sup>: 406.0930, Found: 406.0936.

**diethyl 3,3'-(2-((benzothiazol-2-ylthio)methyl)naphthalene-1,3-diyl)(2*E*,2'*E*)-diacrylate (6j'')**

The title compound was prepared according to General Procedure 8. The crude residue was purified

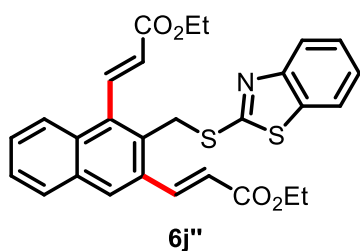

by preparative TLC (20% EtOAc/hexanes). Purification afforded **6j''**

as a yellow solid (5.4 mg, 10%). **<sup>1</sup>H NMR** (600 MHz, CDCl<sub>3</sub>)  $\delta$  8.30 (d, *J* = 16.3 Hz, 1H), 8.23 (d, *J* = 15.6 Hz, 1H), 8.07 (s, 1H), 7.98–7.93 (m, 2H), 7.88–7.84 (m, 1H), 7.76 (d, *J* = 7.9 Hz, 1H), 7.54 (dd, *J* = 6.4, 3.2 Hz, 2H), 7.46–7.42 (m, 1H), 7.34–7.30 (m, 1H), 6.52 (d, *J* = 15.6 Hz, 1H), 6.31 (d, *J* = 16.3 Hz, 1H), 4.96 (s, 2H), 4.23 (q, *J* = 7.1 Hz, 2H), 4.18 (q, *J* = 7.1 Hz, 2H), 1.27 (t, *J* = 7.1 Hz, 3H), 1.22 (t,

*J* = 7.2 Hz, 3H). **<sup>13</sup>C NMR** (150 MHz, CDCl<sub>3</sub>)  $\delta$  166.49, 165.97, 165.36, 153.20, 141.92, 141.64, 135.59, 134.72, 132.82, 132.79, 132.01, 129.51, 128.93, 127.95, 127.92, 127.71, 127.27, 126.24, 125.67, 124.56, 122.39, 121.88, 121.16, 61.01, 33.55, 14.34. **HRMS** calcd. for C<sub>28</sub>H<sub>26</sub>NO<sub>4</sub>S<sub>2</sub><sup>+</sup> [M+H]<sup>+</sup>: 504.1298, Found: 504.1308. **X-ray** (single-crystal) Yellow blocks of X-ray diffraction quality were obtained by vapor diffusion of ether into a saturated solution of **6j''** in acetonitrile (CCDC 1905652).<sup>23</sup>

**ethyl (E)-3-(2-((benzothiazol-2-ylthio)methyl)-5-fluorophenyl)acrylate (6k)**

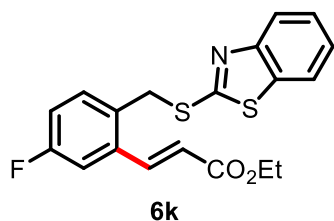

The title compound was prepared according to General Procedure 8. The crude residue was purified by mass-directed prep LC. The crude material was purified on a Waters Autopurification LC with a Waters BEH C18 column (19×160 mm, 5 mm) using a 0.1% aqueous formic acid:acetonitrile gradient (30 mL/min, main segment of gradient at 65–95% acetonitrile over 8 min) at ambient temperature. Fractionation was

triggered by a Waters QDa single quadrupole mass spec in ESI+ (*m/z* = 374.1 [M+H], cone voltage 15V). Purification afforded **6k** as a yellow solid (11.4 mg, 30%). **<sup>1</sup>H NMR** (600 MHz, CDCl<sub>3</sub>)  $\delta$  8.06 (dd, *J* = 15.8, 1.4 Hz, 1H), 7.92 (d, *J* = 8.1 Hz, 1H), 7.75 (d, *J* = 7.9 Hz, 1H), 7.50 (dd, *J* = 8.6, 5.6 Hz, 1H), 7.43 (t, *J* = 7.7 Hz, 1H), 7.31 (t, *J* = 7.6 Hz, 1H), 7.29–7.23 (m, 1H), 7.03 (td, *J* = 8.2, 2.7 Hz, 1H), 6.38 (d, *J* = 15.7 Hz, 1H), 4.71 (s, 2H), 4.24 (q, *J* = 7.1 Hz, 2H), 1.29 (t, *J* = 7.1 Hz, 3H). **<sup>13</sup>C NMR** (150 MHz, CDCl<sub>3</sub>)  $\delta$  166.40, 165.38, 163.35, 161.71, 153.15, 140.12, 140.11, 136.19, 136.14, 135.57, 133.03, 132.98, 131.37, 131.35, 126.26, 124.60, 122.25, 121.80, 121.20, 117.28, 117.14, 113.78, 113.63, 60.92, 34.49, 14.39. **<sup>19</sup>F NMR** (376 MHz, CDCl<sub>3</sub>)  $\delta$  -113.51. **HRMS** calcd. for C<sub>19</sub>H<sub>17</sub>FNO<sub>2</sub>S<sub>2</sub><sup>+</sup> [M+H]<sup>+</sup>: 374.0679, Found: 374.0688.

**diethyl 3,3'-(2-((benzothiazol-2-ylthio)methyl)-5-fluoro-1,3-phenylene)(2*E*,2'*E*)-diacrylate (6k')**: The title compound was prepared according to General Procedure 8. The crude residue was

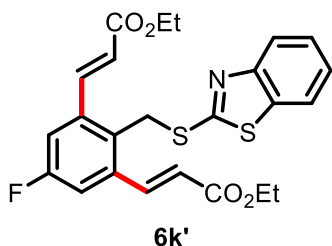

purified by mass-directed prep LC. The crude material was purified on a Waters Autopurification LC with a Waters BEH C18 column (19×160 mm, 5 mm) using a 0.1% aqueous formic acid:acetonitrile gradient (30 mL/min, main segment of gradient at 65–95% acetonitrile over 8 min) at ambient temperature. Fractionation was triggered by a Waters QDa single quadrupole mass spec in ESI+ ( $m/z = 472.1$  [M+H], cone voltage 15V). Purification afforded **6k'** as a yellow liquid (4 mg, 9%). **<sup>1</sup>H NMR**

(600 MHz, CDCl<sub>3</sub>)  $\delta$  8.13 (dd,  $J = 15.9, 4.7$  Hz, 2H), 7.96 (t,  $J = 6.7$  Hz, 1H), 7.76 (t,  $J = 6.8$  Hz, 1H), 7.44 (d,  $J = 6.9$  Hz, 1H), 7.37–7.22 (m, 3H), 6.50–6.23 (m, 2H), 4.84 (s, 2H), 4.23 (t,  $J = 6.8$  Hz, 4H), 1.27 (d,  $J = 6.7$  Hz, 6H). **<sup>13</sup>C NMR** (150 MHz, CDCl<sub>3</sub>)  $\delta$  166.12, 164.77, 163.09, 161.44, 153.12, 140.39, 140.37, 138.08, 138.03, 135.66, 129.75, 129.73, 126.29, 124.69, 123.59, 122.00, 121.19, 115.50, 115.35, 61.00, 31.16, 14.35. **<sup>19</sup>F NMR** (376 MHz, CDCl<sub>3</sub>)  $\delta$  -112.60. **HRMS** calcd. for C<sub>24</sub>H<sub>23</sub>FNO<sub>4</sub>S<sub>2</sub><sup>+</sup> [M+H]<sup>+</sup>: 472.1047, Found: 472.1050.

**ethyl (*E*)-3-(2-((benzothiazol-2-ylthio)methyl)-3-fluorophenyl)acrylate (6l)**: The title compound

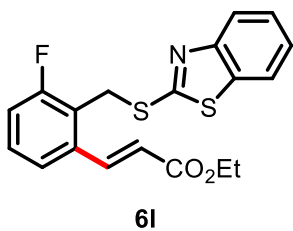

was prepared according to General Procedure 10. The crude residue was purified by preparative TLC (20% EtOAc/hexanes). Purification afforded **6l** as an orange solid (13.9 mg, 37%). **<sup>1</sup>H NMR** (600 MHz, CDCl<sub>3</sub>)  $\delta$  8.22 (d,  $J = 15.8$  Hz, 1H), 7.96 (dt,  $J = 8.1, 0.9$  Hz, 1H), 7.75 (ddd,  $J = 8.0, 1.3, 0.6$  Hz, 1H), 7.43 (ddd,  $J = 8.3, 7.3, 1.2$  Hz, 1H), 7.40–7.35 (m, 1H), 7.34–7.27 (m, 2H), 7.11 (ddd,  $J = 9.5, 8.2, 1.2$  Hz, 1H), 6.39 (d,  $J = 15.8$  Hz,

1H), 4.81 (d,  $J = 1.8$  Hz, 2H), 4.22 (q,  $J = 7.1$  Hz, 2H), 1.27 (t,  $J = 7.1$  Hz, 3H). **<sup>13</sup>C NMR** (150 MHz, CDCl<sub>3</sub>)  $\delta$  166.44, 165.42, 162.54, 160.89, 153.21, 140.53, 140.50, 136.57, 136.55, 135.68, 129.66, 129.60, 126.22, 124.56, 123.08, 122.98, 122.84, 122.82, 122.40, 121.95, 121.14, 116.88, 116.73, 60.84, 27.76, 14.39. **<sup>19</sup>F NMR** (376 MHz, CDCl<sub>3</sub>)  $\delta$  -114.53. **HRMS** calcd. for C<sub>19</sub>H<sub>17</sub>FNO<sub>2</sub>S<sub>2</sub><sup>+</sup> [M+H]<sup>+</sup>: 374.0679, Found: 374.0686.

**ethyl (*E*)-3-(2-((benzothiazol-2-ylthio)methyl)-4-fluorophenyl)acrylate (6m) and ethyl (*E*)-3-((benzothiazol-2-ylthio)methyl)-6-fluorophenyl)acrylate (6m')**:

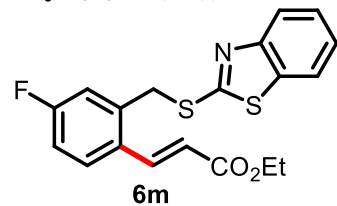

The title compound was prepared according to General Procedure 9. The crude residue was purified by preparative TLC (20% EtOAc/hexanes). Purification afforded a 7:2 mixture of (**6m**) to (**6m'**) as a brown solid (11 mg, 29%). Because all of the peaks belonging to each of the two isomers could not be clearly resolved, the analytical data below correspond to the mixture: **<sup>1</sup>H NMR** (600 MHz, CDCl<sub>3</sub>)  $\delta$  8.06 (d,  $J = 15.7$  Hz, 3H), 7.92 (d,  $J = 8.2$  Hz, 4H), 7.87 (d,  $J = 16.2$  Hz, 1H), 7.75 (d,  $J = 7.9$  Hz, 4H), 7.57 (dd,  $J = 8.7, 5.7$  Hz, 3H), 7.43 (ddd,  $J = 8.3, 7.2, 1.3$  Hz, 4H), 7.37–7.27 (m, 9H), 7.09–7.03 (m, 1H), 7.01 (td,  $J = 8.3, 2.7$  Hz, 3H), 6.62 (dd,  $J = 16.2, 1.2$  Hz, 1H), 6.34 (d,

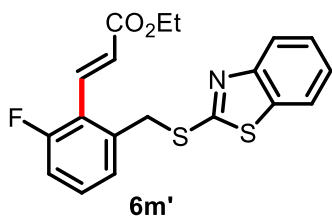



$J = 15.7$  Hz, 3H), 4.75 (s, 2H), 4.72 (s, 6H), 4.27–4.20 (m, 8H), 1.33–1.25 (m, 12H).  $^{13}\text{C NMR}$  (150 MHz,  $\text{CDCl}_3$ )  $\delta$  166.88, 166.65, 165.31, 165.12, 164.34, 162.68, 162.56, 160.88, 153.14, 153.10, 140.12, 138.21, 138.16, 137.83, 135.61, 134.94, 130.64, 130.57, 130.32, 130.29, 129.19, 129.14, 126.99, 126.81, 126.78, 126.28, 126.26, 125.69, 125.60, 124.63, 124.60, 124.23, 122.46, 122.18, 121.84, 121.82, 121.20, 120.90, 120.89, 117.98, 117.83, 116.13, 115.97, 115.88, 115.73, 60.84, 60.80, 35.21, 35.19, 34.66, 14.42, 14.38.  $^{19}\text{F NMR}$  (376 MHz,  $\text{CDCl}_3$ )  $\delta$  -110.39, -110.41, -110.41, -110.43, -110.44, -110.45, -110.66, -110.68, -110.69, -110.70. **HRMS** calcd. for  $\text{C}_{19}\text{H}_{17}\text{FNO}_2\text{S}_2^+$   $[\text{M}+\text{H}]^+$ : 374.0679, Found: 374.0683

**diethyl 3,3'-(2-((benzothiazol-2-ylthio)methyl)-4-fluoro-1,3-phenylene)(2*E*,2'*E*)-diacrylate (6m'')**: The title compound was prepared according to General Procedure 9. The crude residue was

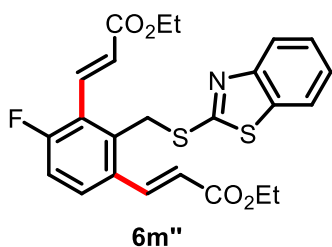

purified by preparative TLC (20% EtOAc/hexanes). Purification afforded **6m''** as a yellow solid (1.1 mg, 2%).  $^1\text{H NMR}$  (600 MHz,  $\text{CDCl}_3$ )  $\delta$  8.12 (d,  $J = 15.6$  Hz, 1H), 7.96 (d,  $J = 8.1$  Hz, 1H), 7.88 (d,  $J = 16.2$  Hz, 1H), 7.78–7.74 (m, 1H), 7.54 (dd,  $J = 8.7, 5.3$  Hz, 1H), 7.48–7.41 (m, 1H), 7.36–7.29 (m, 1H), 7.15–7.08 (m, 1H), 6.55 (dd,  $J = 16.2, 1.4$  Hz, 1H), 6.32 (d,  $J = 15.7$  Hz, 1H), 4.86 (s, 2H), 4.20 (qd,  $J = 7.1, 2.6$  Hz, 4H), 1.25 (dt,  $J = 7.2, 3.6$  Hz, 6H).  $^{13}\text{C NMR}$  (150 MHz,  $\text{CDCl}_3$ )

$\delta$  166.46, 166.37, 164.64, 162.72, 161.02, 153.10, 140.64, 136.09, 136.07, 135.67, 134.85, 131.86, 131.84, 129.55, 129.48, 126.94, 126.87, 126.29, 124.69, 123.89, 123.80, 122.28, 122.02, 121.18, 116.62, 116.46, 60.93, 32.02, 29.85, 14.35.  $^{19}\text{F NMR}$  (376 MHz,  $\text{CDCl}_3$ )  $\delta$  -108.05. **HRMS** calcd. for  $\text{C}_{24}\text{H}_{23}\text{FNO}_4\text{S}_2^+$   $[\text{M}+\text{H}]^+$ : 472.1047, Found: 472.1052.

**ethyl (*E*)-3-(2-((benzothiazol-2-ylthio)methyl)-5-(trifluoromethoxy)phenyl)acrylate (6n)**: The

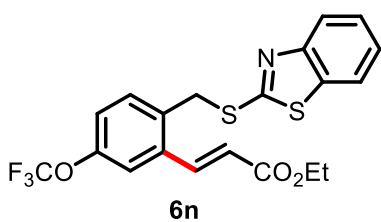

title compound was prepared according to General Procedure 10. The crude residue was purified by preparative TLC (20% EtOAc/hexanes). Purification afforded **6n** as a yellow solid (11.5 mg, 26%).  $^1\text{H NMR}$  (600 MHz,  $\text{CDCl}_3$ )  $\delta$  8.08 (d,  $J = 15.7$  Hz, 1H), 7.92 (d,  $J = 8.1$  Hz, 1H), 7.76 (dd,  $J = 8.0, 1.1$  Hz, 1H), 7.57 (d,  $J = 8.5$  Hz, 1H), 7.47–7.41 (m, 1H), 7.41–7.39 (m, 1H), 7.34–7.29 (m,

1H), 7.17 (dt,  $J = 8.3, 1.9$  Hz, 1H), 6.40 (d,  $J = 15.7$  Hz, 1H), 4.73 (s, 2H), 4.24 (q,  $J = 7.2$  Hz, 2H), 1.30 (t,  $J = 7.1$  Hz, 3H).  $^{13}\text{C NMR}$  (150 MHz,  $\text{CDCl}_3$ )  $\delta$  166.29, 165.13, 153.10, 149.14, 139.90, 136.06, 135.61, 134.24, 132.73, 130.72, 126.29, 124.66, 123.08, 122.68, 122.29, 121.83, 121.37, 121.22, 119.66, 119.36, 117.95, 60.98, 34.31, 14.39.  $^{19}\text{F NMR}$  (376 MHz,  $\text{CDCl}_3$ )  $\delta$  -58.75. **HRMS** calcd. for  $\text{C}_{20}\text{H}_{17}\text{F}_3\text{NO}_3\text{S}_2^+$   $[\text{M}+\text{H}]^+$ : 440.0597, Found: 440.0605.

**(R)-3-(3,4-dimethoxyphenyl)-1-methoxy-1-oxopropan-2-yl****(E)-3-(2-((benzothiazol-2-****ylthio)methyl)-3,4-dimethoxyphenyl)acrylate (6o):** The title compound was prepared on a 3.780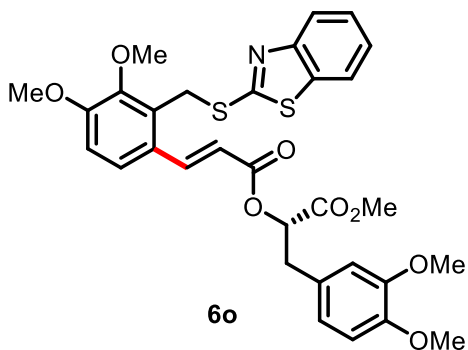**6o**

mmol scale according to General Procedure 9. The crude residue was purified by SiO<sub>2</sub> gel column chromatography (2.5% Et<sub>2</sub>O/CH<sub>2</sub>Cl<sub>2</sub>). Purification afforded **6o** as a yellow solid (1.975 g, 86%). <sup>1</sup>H NMR (600 MHz, CDCl<sub>3</sub>) δ 8.22 (d, *J* = 15.6 Hz, 1H), 7.95–7.92 (m, 1H), 7.74 (dt, *J* = 7.9, 0.9 Hz, 1H), 7.44–7.36 (m, 2H), 7.31–7.27 (m, 1H), 6.91 (d, *J* = 8.7 Hz, 1H), 6.78–6.71 (m, 3H), 6.34 (d, *J* = 15.7 Hz, 1H), 5.28 (dd, *J* = 8.4, 4.6 Hz, 1H), 4.83 (d, *J* = 1.1 Hz, 2H), 3.93 (s, 3H), 3.91 (s, 3H), 3.83 (s, 3H), 3.81 (s, 3H), 3.72 (s, 3H), 3.13–3.01 (m, 2H). <sup>13</sup>C NMR (150 MHz, CDCl<sub>3</sub>) δ 170.48, 166.22, 166.13, 154.39, 153.32, 148.91, 148.17, 148.12, 142.83, 135.50, 129.68, 128.52, 127.11, 126.20, 124.42, 123.20, 121.90, 121.70, 121.09, 117.66, 112.48, 112.40, 111.29, 73.35, 61.54, 56.00, 55.98, 55.96, 52.45, 37.24, 28.98. HRMS calcd. for C<sub>31</sub>H<sub>32</sub>NO<sub>8</sub>S<sub>2</sub><sup>+</sup> [M+H]<sup>+</sup>: 610.1564, Found: 610.1566.

**tert-butyl (E)-3-(2-((benzothiazol-2-ylthio)methyl)-3-methylphenyl)acrylate (6p):** The title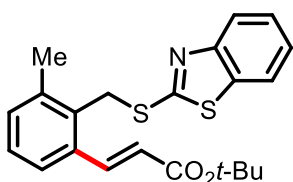**6p**

compound was prepared according to General Procedure 8 with a reaction time of 24 h. The crude residue was purified by mass-directed prep LC. The crude material was purified on a Waters Autopurification LC with a Waters BEH C18 column (19×160 mm, 5 mm) using a 0.1% aqueous formic acid:acetonitrile gradient (30 mL/min, main segment of gradient at 65–95% acetonitrile over 8 min) at ambient temperature. Fractionation was

triggered by a Waters QDa single quadrupole mass spec in ESI+ (*m/z* = 398.1 [M+H], cone voltage 15V). Purification afforded **6p** as a brown solid (33 mg, 82%). <sup>1</sup>H NMR (600 MHz, CDCl<sub>3</sub>) δ 8.07 (d, *J* = 15.6 Hz, 1H), 7.94 (d, *J* = 8.1 Hz, 1H), 7.77 (d, *J* = 7.5 Hz, 1H), 7.46–7.42 (m, 2H), 7.33–7.29 (m, 1H), 7.23 (d, *J* = 4.7 Hz, 2H), 6.31 (d, *J* = 15.7 Hz, 1H), 4.79 (s, 2H), 2.49 (s, 3H), 1.47 (s, 9H). <sup>13</sup>C NMR (150 MHz, CDCl<sub>3</sub>) δ 166.25, 166.08, 153.32, 140.94, 138.58, 135.45, 135.29, 132.36, 132.15, 128.40, 126.21, 125.22, 124.47, 123.41, 121.79, 121.15, 80.72, 32.37, 28.28, 19.95. HRMS calcd. for C<sub>22</sub>H<sub>24</sub>NO<sub>2</sub>S<sub>2</sub><sup>+</sup> [M+H]<sup>+</sup>: 398.1243, Found: 398.1256.

***n*-butyl (E)-3-(2-((benzothiazol-2-ylthio)methyl)-3-methylphenyl)acrylate (6q):** The title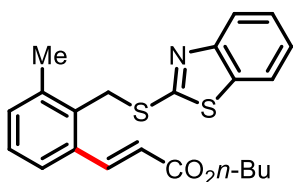**6q**

compound was prepared according to General Procedure 10 with a reaction time of 24 h. The crude residue was purified by mass-directed prep LC. The crude material was purified on a Waters Autopurification LC with a Waters BEH C18 column (19×160 mm, 5 mm) using a 0.1% aqueous formic acid:acetonitrile gradient (30 mL/min, main segment of gradient at 65–95% acetonitrile over 8 min) at ambient temperature. Fractionation was

triggered by a Waters QDa single quadrupole mass spec in ESI+ (*m/z* = 398.1 [M+H], cone voltage 15V). Purification afforded **6q** as a yellow solid (25 mg, 63%). <sup>1</sup>H NMR (600 MHz, CDCl<sub>3</sub>) δ 8.16 (d, *J* = 15.7 Hz, 1H), 7.94 (dt, *J* = 8.1, 0.9 Hz, 1H), 7.77 (dt, *J* = 8.0, 0.9 Hz, 1H), 7.48–7.42 (m, 2H), 7.32 (ddd, *J* = 8.3, 7.3, 1.2 Hz, 1H), 7.24 (d, *J* = 5.2 Hz, 2H), 6.37 (d, *J* = 15.7 Hz, 1H), 4.79 (s, 2H),

4.15 (t,  $J = 6.7$  Hz, 2H), 2.49 (s, 3H), 1.65–1.57 (m, 2H), 1.39–1.31 (m, 2H), 0.87 (t,  $J = 7.4$  Hz, 3H).  $^{13}\text{C}$  NMR (150 MHz,  $\text{CDCl}_3$ )  $\delta$  166.83, 166.14, 153.31, 141.96, 138.62, 135.48, 135.16, 132.51, 132.37, 128.46, 126.23, 125.25, 124.53, 121.79, 121.61, 121.18, 64.61, 32.35, 30.82, 19.96, 19.29, 13.82. HRMS calcd. for  $\text{C}_{22}\text{H}_{24}\text{NO}_2\text{S}_2^+$   $[\text{M}+\text{H}]^+$ : 398.1243, Found: 398.1256.

**(E)-3-(2-((benzothiazol-2-ylthio)methyl)-3-methylphenyl)-N,N-dimethylacrylamide (6r):** The

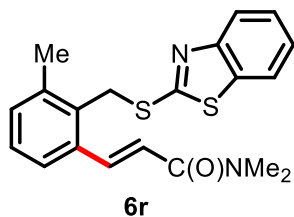

title compound was prepared according to General Procedure 10. The crude residue was purified by mass-directed prep LC. The crude material was purified on a Waters Autopurification LC with a Waters BEH C18 column (19×160 mm, 5 mm) using a 0.1% aqueous formic acid:acetonitrile gradient (30 mL/min, main segment of gradient at 65–95% acetonitrile over 8 min) at ambient temperature. Fractionation was triggered by a

Waters QDa single quadrupole mass spec in ESI+ ( $m/z = 369.1$   $[\text{M}+\text{H}]$ , cone voltage 15V). Purification afforded **6r** as a yellow solid (23 mg, 62%).  $^1\text{H}$  NMR (600 MHz,  $\text{CDCl}_3$ )  $\delta$  8.05 (d,  $J = 15.2$  Hz, 1H), 7.95–7.90 (m, 1H), 7.79–7.75 (m, 1H), 7.43 (ddd,  $J = 8.3, 7.2, 1.3$  Hz, 1H), 7.39 (dd,  $J = 7.2, 1.9$  Hz, 1H), 7.31 (ddd,  $J = 8.3, 7.3, 1.2$  Hz, 1H), 7.25–7.19 (m, 2H), 6.80 (d,  $J = 15.2$  Hz, 1H), 4.78 (s, 2H), 3.09 (s, 3H), 3.02 (s, 3H), 2.50 (s, 3H).  $^{13}\text{C}$  NMR (150 MHz,  $\text{CDCl}_3$ )  $\delta$  166.55, 166.28, 153.32, 139.85, 138.66, 136.47, 135.42, 132.05, 131.64, 128.32, 126.19, 125.52, 124.43, 121.78, 121.59, 121.13, 37.53, 35.98, 32.78, 19.91. HRMS calcd. for  $\text{C}_{20}\text{H}_{21}\text{N}_2\text{OS}_2^+$   $[\text{M}+\text{H}]^+$ : 369.1090, Found: 369.1100.

**(E)-3-(2-((benzothiazol-2-ylthio)methyl)-3-methylphenyl)-N,N-dimethylacrylamide (6s):** The

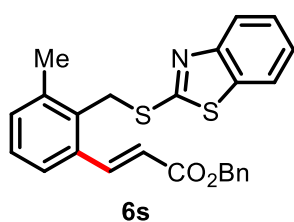

title compound was prepared according to General Procedure 10. The crude residue was purified by mass-directed prep LC. The crude material was purified on a Waters Autopurification LC with a Waters BEH C18 column (19×160 mm, 5 mm) using a 0.1% aqueous formic acid:acetonitrile gradient (30 mL/min, main segment of gradient at 65–95% acetonitrile over 8 min) at ambient temperature. Fractionation was triggered by a

Waters QDa single quadrupole mass spec in ESI+ ( $m/z = 398.1$   $[\text{M}+\text{H}]$ , cone voltage 15V). Purification afforded **6s** as a brown solid (26 mg, 60%).  $^1\text{H}$  NMR (600 MHz,  $\text{CDCl}_3$ )  $\delta$  8.23 (d,  $J = 15.7$  Hz, 1H), 7.94 (d,  $J = 8.1$  Hz, 1H), 7.82–7.73 (m, 1H), 7.47–7.40 (m, 2H), 7.38–7.21 (m, 8H), 6.42 (d,  $J = 15.7$  Hz, 1H), 5.20 (s, 2H), 4.79 (s, 2H), 2.49 (s, 3H).  $^{13}\text{C}$  NMR (150 MHz,  $\text{CDCl}_3$ )  $\delta$  166.52, 166.06, 153.30, 142.62, 138.66, 136.11, 135.50, 134.99, 132.61, 132.50, 128.65, 128.47, 128.29, 126.24, 125.25, 124.53, 121.82, 121.17, 121.12, 66.48, 32.34, 19.96. HRMS calcd. for  $\text{C}_{25}\text{H}_{22}\text{NO}_2\text{S}_2^+$   $[\text{M}+\text{H}]^+$ : 432.1086, Found: 432.1090.

**methyl (E)-3-(2-((benzothiazol-2-ylthio)methyl)-3-methylphenyl)acrylate (6t):** The title compound was prepared according to General Procedure 10. The crude residue was purified by preparative TLC (10% EtOAc/hexanes). Purification afforded **6t** as a yellow liquid (18 mg, 50%). <sup>1</sup>H NMR (600 MHz, CDCl<sub>3</sub>) δ 8.17 (d, *J* = 15.7 Hz, 1H), 7.95 (d, *J* = 8.0 Hz, 1H), 7.78 (d, *J* = 8.0 Hz, 1H), 7.50–7.40 (m, 2H), 7.35–7.29 (m, 1H), 7.26–7.22 (m, 2H), 6.37 (d, *J* = 15.7 Hz, 1H), 4.79 (s, 2H), 3.74 (s, 3H), 2.49 (s, 3H). <sup>13</sup>C NMR (150 MHz, CDCl<sub>3</sub>) δ 167.15, 166.13, 153.29, 142.29, 138.64, 135.52, 135.06, 132.65, 132.44, 128.47, 126.24, 125.27, 124.54, 121.79, 121.18, 51.86, 32.31, 19.95. HRMS calcd. for C<sub>19</sub>H<sub>18</sub>NO<sub>2</sub>S<sub>2</sub><sup>+</sup> [M+H]<sup>+</sup>: 356.0774, Found: 356.0788.

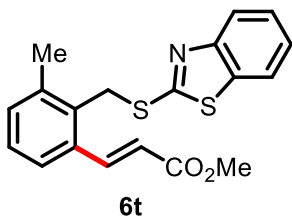

**(E)-2-((2-methyl-6-styrylbenzyl)thio)benzothiazole (6u):** The title compound was prepared according to General Procedure 10 with a reaction time of 24 h. The crude residue was purified by mass-directed prep LC. The crude material was purified on a Waters Autopurification LC with a Waters BEH C18 column (19×160 mm, 5 mm) using a 0.1% aqueous formic acid:acetonitrile gradient (30 mL/min, main segment of gradient at 55–75% acetonitrile over 8 min) at ambient temperature. Fractionation was triggered by a Waters QDa single quadrupole mass spec in ESI+ (*m/z* = 374.1 [M+H], cone voltage 15V). Purification afforded **6u** as a yellow solid (19 mg, 50%). <sup>1</sup>H NMR (600 MHz, CDCl<sub>3</sub>) δ 7.96–7.91 (m, 1H), 7.80–7.75 (m, 1H), 7.54 (d, *J* = 16.0 Hz, 1H), 7.52–7.49 (m, 1H), 7.45 (ddd, *J* = 8.3, 5.5, 1.5 Hz, 3H), 7.33 (ddd, *J* = 8.2, 7.3, 1.2 Hz, 1H), 7.30–7.19 (m, 4H), 7.16 (d, *J* = 7.4 Hz, 1H), 7.02 (d, *J* = 16.0 Hz, 1H), 4.86 (s, 2H), 2.50 (s, 3H). <sup>13</sup>C NMR (150 MHz, CDCl<sub>3</sub>) δ 166.85, 153.35, 138.08, 137.43, 135.52, 132.07, 131.19, 130.07, 128.76, 128.34, 127.90, 126.88, 126.24, 126.14, 124.48, 121.72, 121.21, 32.74, 20.06. HRMS calcd. for C<sub>23</sub>H<sub>20</sub>NS<sub>2</sub><sup>+</sup> [M+H]<sup>+</sup>: 374.1032, Found: 374.1041. X-ray (single-crystal) Yellow blocks of X-ray diffraction quality were obtained by vapor diffusion of ether into a saturated solution of **6u** in acetonitrile (CCDC 1905649).<sup>23</sup>

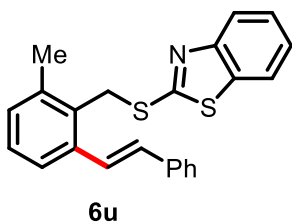

**(E)-4-(2-((benzothiazol-2-ylthio)methyl)-3-methylphenyl)but-3-en-2-one (6v):** The title compound was prepared according to General Procedure 10 with a reaction time of 24 h. The crude residue was purified by mass-directed prep LC. The crude material was purified on a Waters Autopurification LC with a Waters BEH C18 column (19×160 mm, 5 mm) using a 0.1% aqueous formic acid:acetonitrile gradient (30 mL/min, main segment of gradient at 65–95% acetonitrile over 8 min) at ambient temperature. Fractionation was triggered by a Waters QDa single quadrupole mass spec in ESI+ (*m/z* = 340.1 [M+H], cone voltage 15V). Purification afforded **6v** as a yellow solid (15.5 mg, 46%). <sup>1</sup>H NMR (600 MHz, CDCl<sub>3</sub>) δ 8.00 (d, *J* = 16.0 Hz, 1H), 7.95–7.89 (m, 1H), 7.78 (dd, *J* = 7.9, 1.1 Hz, 1H), 7.45 (ddd, *J* = 8.0, 5.8, 2.2 Hz, 2H), 7.33 (td, *J* = 7.7, 1.1 Hz, 1H), 7.26 (d, *J* = 5.9 Hz, 2H), 6.61 (d, *J* = 16.0 Hz, 1H), 4.83 (s, 2H), 2.50 (s, 3H), 2.30 (s, 3H). <sup>13</sup>C NMR (150 MHz, CDCl<sub>3</sub>) δ 198.53, 165.93, 153.19, 140.90, 138.56, 135.49, 135.01, 132.92, 132.57, 130.44, 128.52, 126.33, 125.23, 124.65, 121.72, 121.24, 32.22, 27.41, 20.00. HRMS calcd. for C<sub>19</sub>H<sub>18</sub>NOS<sub>2</sub><sup>+</sup> [M+H]<sup>+</sup>: 340.0824, Found: 340.0836.

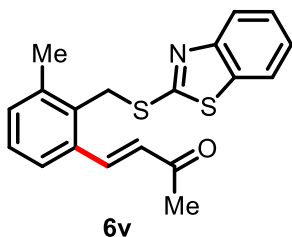

**methyl 2-(2-((benzothiazol-2-ylthio)methyl)-3-methylbenzyl)acrylate (6w):** The title compound was prepared according to General Procedure 10 using methyl methacrylate as the alkene. The crude residue was purified by mass-directed prep LC. The crude material was purified on a Waters Autopurification LC with a Waters BEH C18 column (19×160 mm, 5 mm) using a 0.1% aqueous formic acid:acetonitrile gradient (30 mL/min, main segment of gradient at 65–95% acetonitrile over 8 min) at ambient temperature. Fractionation was triggered by a Waters QDa single

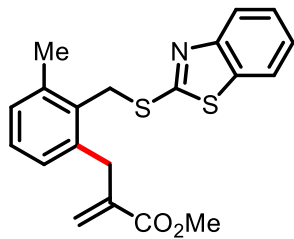

**6w**

quadrupole mass spec in ESI+ ( $m/z = 370.1$  [M+H], cone voltage 15V). Purification afforded **6w** as a yellow solid (16 mg, 44%). **<sup>1</sup>H NMR** (600 MHz, CDCl<sub>3</sub>) δ 7.90 (d,  $J = 8.1$  Hz, 1H), 7.80–7.69 (m, 1H), 7.45–7.40 (m, 1H), 7.35–7.28 (m, 1H), 7.18 (t,  $J = 7.6$  Hz, 1H), 7.12 (d,  $J = 7.5$  Hz, 1H), 7.03 (d,  $J = 7.5$  Hz, 1H), 6.26 (d,  $J = 1.6$  Hz, 1H), 5.27 (d,  $J = 1.6$  Hz, 1H), 4.67 (s, 2H), 3.80 (s, 2H), 3.70 (s, 3H), 2.47 (s, 3H). **<sup>13</sup>C NMR** (150 MHz, CDCl<sub>3</sub>) δ 167.41, 167.01, 153.34, 139.79, 138.53, 138.19, 135.39, 132.03, 129.46, 128.66, 128.32, 126.72, 126.20, 124.40, 121.63, 121.15, 52.10, 35.32, 32.55, 20.08. **HRMS** calcd. for C<sub>20</sub>H<sub>20</sub>NO<sub>2</sub>S<sub>2</sub><sup>+</sup> [M+H]<sup>+</sup>: 370.0930, Found: 370.0938.

**methyl 2-(2-((benzothiazol-2-ylthio)methyl)-3-methylbenzyl)acrylate (6x):** The title compound was prepared according to General Procedure 8 with a reaction time of 24 h. The crude residue was purified by mass-directed prep LC. The crude material was purified on a Waters Autopurification LC with a Waters BEH C18 column (19×160 mm, 5 mm) using a 0.1% aqueous formic acid:acetonitrile gradient (30 mL/min, main segment of gradient at 65–95% acetonitrile over 8 min) at ambient temperature. Fractionation was

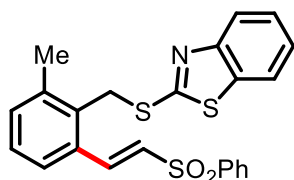

**6x**

triggered by a Waters QDa single quadrupole mass spec in ESI+ ( $m/z = 438.1$  [M+H], cone voltage 15V). Purification afforded **6x** as a yellow solid (18.5 mg, 44%). **<sup>1</sup>H NMR** (600 MHz, CDCl<sub>3</sub>) δ 8.17 (d,  $J = 15.1$  Hz, 1H), 8.00 (d,  $J = 8.1$  Hz, 1H), 7.91–7.86 (m, 2H), 7.82–7.78 (m, 1H), 7.53–7.41 (m, 4H), 7.38–7.30 (m, 2H), 7.26 (d,  $J = 7.8$  Hz, 1H), 7.22 (t,  $J = 7.6$  Hz, 1H), 6.82 (d,  $J = 15.1$  Hz, 1H), 4.77 (s, 2H), 2.48 (s, 3H). **<sup>13</sup>C NMR** (150 MHz, CDCl<sub>3</sub>) δ 165.52, 153.26, 140.48, 140.40, 138.89, 135.42, 133.46, 133.16, 133.11, 133.08, 130.78, 129.37, 128.57, 127.89, 126.37, 125.69, 124.67, 121.97, 121.19, 32.10, 19.97. **HRMS** calcd. for C<sub>23</sub>H<sub>20</sub>NO<sub>2</sub>S<sub>3</sub><sup>+</sup> [M+H]<sup>+</sup>: 438.0651, Found: 438.0660. **X-ray** (single-crystal) Yellow blocks of X-ray diffraction quality were obtained by vapor diffusion of ether into a saturated solution of **6x** in acetonitrile (CCDC 1905646).<sup>23</sup>

**(E)-2-((2-(dodec-1-en-1-yl)-6-methylbenzyl)thio)benzothiazole (6y):** The title compound was prepared according to General Procedure 10. The crude residue was purified by mass-directed prep LC. The crude material was purified on a Waters Autopurification LC with a Waters BEH C18 column (19×160 mm, 5 mm) using a 0.1% aqueous formic acid:acetonitrile gradient (30 mL/min, main segment of gradient at 65–95% acetonitrile over 24 min) at ambient temperature. Fractionation was triggered by a Waters QDa single

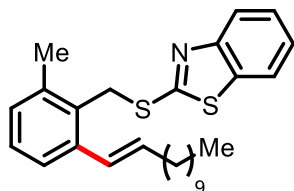

**6y**

quadrupole mass spec in ESI+ ( $m/z = 438.2$  [M+H], cone voltage 15V). Purification afforded **6y** as

a yellow solid (16.5 mg, 38%).  $^1\text{H NMR}$  (600 MHz,  $\text{CDCl}_3$ )  $\delta$  7.91 (d,  $J = 8.1$  Hz, 1H), 7.78 (d,  $J = 8.0$  Hz, 1H), 7.44 (t,  $J = 7.7$  Hz, 1H), 7.31 (t,  $J = 7.6$  Hz, 1H), 7.17 (t,  $J = 7.5$  Hz, 1H), 7.09 (t,  $J = 7.5$  Hz, 2H), 5.56–5.45 (m, 2H), 4.71 (s, 2H), 3.55 (d,  $J = 5.1$  Hz, 2H), 2.47 (s, 3H), 2.10 (q,  $J = 7.0$  Hz, 2H), 1.36–1.10 (m, 14H), 0.87 (t,  $J = 7.2$  Hz, 3H).  $^{13}\text{C NMR}$  (150 MHz,  $\text{CDCl}_3$ )  $\delta$  167.14, 153.45, 141.13, 138.32, 135.35, 131.63, 131.22, 128.80, 128.32, 127.74, 127.70, 127.62, 126.20, 124.38, 121.64, 121.12, 32.70, 32.05, 31.42, 29.74, 29.72, 29.65, 29.52, 29.45, 27.60, 22.83, 19.98, 14.28. **HRMS** calcd. for  $\text{C}_{27}\text{H}_{36}\text{NS}_2^+$   $[\text{M}+\text{H}]^+$ : 438.2284, Found: 438.2295.

**(E)-2-(2-((benzothiazol-2-ylthio)methyl)-3-methylphenyl)ethene-1-sulfonyl fluoride (6z):** The

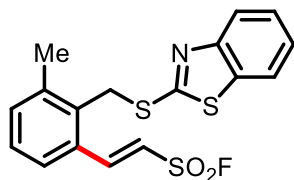

**6z**

title compound was prepared according to General Procedure 10. The crude residue was purified by mass-directed prep LC. The crude material was purified on a Waters Autopurification LC with a Waters BEH C18 column (19×160 mm, 5 mm) using a 0.1% aqueous formic acid:acetonitrile gradient (30 mL/min, main segment of gradient at 65–95% acetonitrile over 8 min) at ambient temperature. Fractionation was triggered by a Waters QDa single quadrupole mass spec in ESI+ ( $m/z = 380.0$   $[\text{M}+\text{H}]$ , cone voltage 15V). Purification afforded **6z** as a yellow solid (11.4 mg, 30%).  $^1\text{H NMR}$  (600 MHz,  $\text{CDCl}_3$ )  $\delta$  8.55 (d,  $J = 15.2$  Hz, 1H), 8.01–7.96 (m, 1H), 7.77 (dd,  $J = 8.0, 1.1$  Hz, 1H), 7.46 (ddd,  $J = 8.2, 7.3, 1.2$  Hz, 1H), 7.41 (d,  $J = 7.8$  Hz, 1H), 7.37 (d,  $J = 7.5$  Hz, 1H), 7.35–7.28 (m, 2H), 6.83 (dd,  $J = 15.2, 2.3$  Hz, 1H), 4.79 (s, 2H), 2.52 (s, 3H).  $^{13}\text{C NMR}$   $\delta$  164.97, 153.11, 147.06, 147.04, 139.35, 135.54, 134.62, 134.54, 131.42, 128.75, 126.39, 125.79, 124.75, 122.03, 121.19, 120.85, 120.67, 31.72, 20.10.  $^{19}\text{F NMR}$  (376 MHz,  $\text{CDCl}_3$ )  $\delta$  61.01. **HRMS** calcd. for  $\text{C}_{17}\text{H}_{15}\text{FNO}_2\text{S}_3^+$   $[\text{M}+\text{H}]^+$ : 380.0244, Found: 380.0253.

**ethyl 3-(2-((benzothiazol-2-ylthio)methyl)-3-methylphenyl)but-2-enoate (6aa):** The

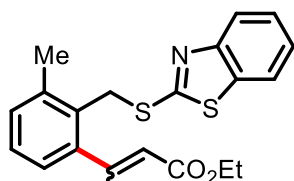

**6aa**

title compound was prepared according to General Procedure 10 with a reaction time of 24 h. The crude residue was purified by preparative TLC (20% EtOAc/hexanes). Purification afforded **6aa** as a yellow solid (7.4 mg, 19%).  $^1\text{H NMR}$  (600 MHz,  $\text{CDCl}_3$ )  $\delta$  7.90 (d,  $J = 8.1$  Hz, 1H), 7.76 (dd,  $J = 8.0, 1.1$  Hz, 1H), 7.46–7.40 (m, 1H), 7.33–7.29 (m, 1H), 7.21 (t,  $J = 7.5$  Hz, 1H), 7.17 (d,  $J = 7.5$  Hz, 1H), 6.98 (dd,  $J = 7.5, 1.5$  Hz, 1H), 5.84 (q,  $J = 1.5$  Hz, 1H), 4.66 (s, 2H), 4.09 (q,  $J = 7.1$  Hz, 2H), 2.52 (d,  $J = 1.5$  Hz, 3H), 2.49 (s, 3H), 1.21 (t,  $J = 7.1$  Hz, 3H).  $^{13}\text{C NMR}$  (150 MHz,  $\text{CDCl}_3$ )  $\delta$  166.63, 166.38, 156.87, 153.29, 145.51, 138.76, 135.36, 130.28, 129.46, 128.11, 126.21, 125.55, 124.42, 121.66, 121.13, 120.38, 60.00, 33.57, 21.92, 19.94, 14.35. **HRMS** calcd. for  $\text{C}_{21}\text{H}_{22}\text{NO}_2\text{S}_2^+$   $[\text{M}+\text{H}]^+$ : 384.1087, Found: 384.1087.

## Characterization Data for Productive (BT)S Removal/Transformation

**(E)-S-(4-phenylbut-3-en-1-yl) benzothiazole-2-carbothioate (8):** The title compound was prepared following a literature procedure.<sup>13</sup> To a 25-mL round-bottom flask equipped with a

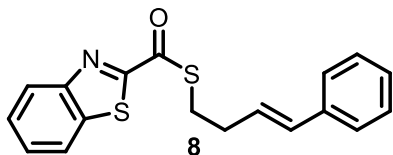

magnetic stir bar were added (E)-2-((4-phenylbut-3-en-1-yl)thio)benzothiazole (**2a**) (0.500 mmol, 1 equiv), Pd(PPh<sub>3</sub>)<sub>4</sub> (5 mol%), 1,1'-bis(diphenylphosphino)ferrocene (5 mol%), Zn(OAc)<sub>2</sub> (0.125 mmol, 0.25 equiv), and K<sub>3</sub>PO<sub>4</sub> (0.125 mmol, 0.25 equiv). The flask was sealed with a rubber septum and filled with

N<sub>2</sub>. To a 4-mL vial charged with MeCN (1 mL) was added *t*BuCN (1.0 mmol, 2 equiv). The *t*BuCN solution was then added via syringe into the 25-mL round-bottom flask. The reaction was heated to 90 °C and allowed to stir for 24 h. The reaction was cooled to room temperature and quenched with 1 N HCl (5 mL) and allowed to stir at room temperature for 1 h. The organic materials were separated by addition of H<sub>2</sub>O (25 mL), followed by extraction with EtOAc (3 × 10 mL). The organic layer was dried over Na<sub>2</sub>SO<sub>4</sub>, and after filtration the solvent was removed *in vacuo*, and the crude residue was purified by preparative TLC (10% Et<sub>2</sub>O/hexanes). Purification afforded **8** as a yellow solid (83 mg, 51%). <sup>1</sup>H NMR (600 MHz, CDCl<sub>3</sub>) δ 8.22 (d, *J* = 8.1 Hz, 1H), 7.98 (d, *J* = 8.0 Hz, 1H), 7.58 (ddd, *J* = 8.3, 7.1, 1.3 Hz, 1H), 7.53 (ddd, *J* = 8.3, 7.1, 1.3 Hz, 1H), 7.38–7.33 (m, 2H), 7.30 (t, *J* = 7.7 Hz, 2H), 7.24–7.19 (m, 1H), 6.51 (d, *J* = 15.8 Hz, 1H), 6.26 (dt, *J* = 15.8, 7.0 Hz, 1H), 3.29 (t, *J* = 7.3 Hz, 2H), 2.65 (qd, *J* = 7.2, 1.5 Hz, 2H). <sup>13</sup>C NMR (150 MHz, CDCl<sub>3</sub>) δ 186.74, 164.35, 153.09, 137.28, 136.66, 132.36, 128.66, 127.78, 127.46, 127.32, 126.32, 125.56, 122.45, 32.84, 29.05. HRMS calcd. for C<sub>18</sub>H<sub>16</sub>NOS<sub>2</sub><sup>+</sup> [M+H]<sup>+</sup>: 326.0668, Found: 326.0668.

**(E)-2-((4-phenylbut-3-en-1-yl)sulfonyl)benzothiazole (9):** The title compound was prepared following a literature procedure.<sup>14</sup> To a 100-mL round-bottom

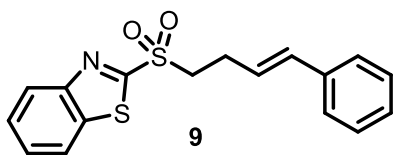

flask equipped with a magnetic stir bar were added (E)-2-((4-phenylbut-3-en-1-yl)thio)benzothiazole (**2a**) (3.00 mmol, 1 equiv), 30% aqueous H<sub>2</sub>O<sub>2</sub> (6.0 mL, 6 equiv), ammonium heptamolybdate tetrahydrate (0.060 mmol, 1 mol%), and ethanol (50 mL, 0.06 M). The reaction was stirred at room

temperature for 12 h. The organic materials were separated by addition of H<sub>2</sub>O (40 mL), followed by extraction with EtOAc (3 × 20 mL). The organic solution was washed with brine (20 mL) and dried over Na<sub>2</sub>SO<sub>4</sub>. After filtration, the solvent was removed *in vacuo*, and **9** was obtained as a yellow solid (962 mg, >95%). <sup>1</sup>H NMR (600 MHz, CDCl<sub>3</sub>) δ 8.22 (d, *J* = 8.3 Hz, 1H), 7.97 (d, *J* = 8.1 Hz, 1H), 7.63 (ddd, *J* = 8.3, 7.1, 1.3 Hz, 1H), 7.57 (td, *J* = 7.6, 7.1, 1.2 Hz, 1H), 7.21 (dtd, *J* = 15.2, 8.2, 7.8, 6.2 Hz, 5H), 6.43 (d, *J* = 15.9 Hz, 1H), 6.07 (dt, *J* = 15.7, 7.0 Hz, 1H), 3.69 (dd, *J* = 8.7, 6.8 Hz, 2H), 2.82 (qd, *J* = 7.5, 1.5 Hz, 2H). <sup>13</sup>C NMR (150 MHz, CDCl<sub>3</sub>) δ 165.97, 152.87, 136.97, 136.57, 133.10, 128.64, 128.20, 127.80, 127.75, 126.22, 125.59, 124.53, 122.46, 54.40, 26.32. HRMS calcd. for C<sub>17</sub>H<sub>16</sub>NO<sub>2</sub>S<sub>2</sub><sup>+</sup> [M+H]<sup>+</sup>: 330.0617, Found: 330.0622. X-ray (single-crystal)

Colorless blocks of X-ray diffraction quality were obtained by vapor diffusion of ether into a saturated solution of **9** in acetonitrile (CCDC 1905644).<sup>23</sup>

**Sodium (*E*)-5-phenylpent-4-enoate (**10**):** The title compound was prepared following a literature

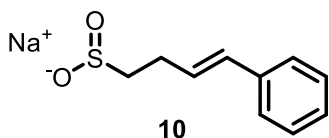

procedure.<sup>14</sup> To a 10-mL round-bottom flask equipped with a stir bar was added (*E*)-2-((4-phenylbut-3-en-1-yl)sulfonyl)benzothiazole (**9**) (0.500 mmol, 1 equiv) in ethanol (1 mL, 0.1 M). NaBH<sub>4</sub> (1.0 mmol, 2 equiv) was added and allowed to stir at room temperature for 6 h. The

solution was then concentrated *in vacuo*, and hexanes were added to the crude product leading to formation of the desired product as a crystal. The crystal was washed with hexanes then dried *in vacuo*, and **10** was obtained as a white solid (10.9 mg, >95%).<sup>13</sup> **<sup>1</sup>H NMR** (600 MHz, D<sub>2</sub>O) δ 7.46 (d, *J* = 7.8 Hz, 2H), 7.38 (t, *J* = 7.8 Hz, 2H), 7.29 (t, *J* = 7.4 Hz, 1H), 6.55 (dd, *J* = 16.1, 3.6 Hz, 1H), 6.43–6.34 (m, 1H), 2.51 (s, 3H). **<sup>13</sup>C NMR** (150 MHz, Deuterium Oxide) δ 138.09, 130.99, 129.88, 129.52, 128.02, 126.67, 60.62, 26.19. **HRMS** calcd. for C<sub>10</sub>H<sub>13</sub>O<sub>2</sub>S<sup>+</sup> [*M*+2*H*-*Na*]<sup>+</sup>: 197.0636, Found: 197.0635.

**1,2-dimethoxy-4-((1*E*,4*E*)-5-phenylpenta-1,4-dien-1-yl)benzene (**11**):** In a 50-mL round-bottom

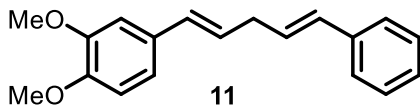

flask, solution of LDA in THF (1.800 mmol, 2.5M) was cooled to -78 ° C and added dropwise to a precooled solution of (*E*)-2-((4-phenylbut-3-en-1-yl)sulfonyl)benzothiazole (**9**) (1.500

mmol, 1.0 equiv) and 3,4-dimethoxybenzaldehyde (1.500 mmol, 1.0 equiv) in THF (15 mL, 0.1 M). The reaction was stirred for 90 min at -78 ° C, during which it turned a bright orange color. The reaction was then warmed to room temperature and stirred for 30 min, at which point it turned yellow. The organic solution was diluted with Et<sub>2</sub>O (5 mL) and washed with brine (5 mL). The aqueous layer was extracted with Et<sub>2</sub>O (3 × 5 mL), combined with the organic layer, and dried with Na<sub>2</sub>SO<sub>4</sub>. The solvent was removed *in vacuo*. The crude residue was purified by SiO<sub>2</sub> gel column chromatography (15% EtO<sub>2</sub>/hexanes). Purification afforded **11** as a yellow solid (228 mg, 54%). **<sup>1</sup>H NMR** (600 MHz, CDCl<sub>3</sub>) δ 7.38 (d, *J* = 7.7 Hz, 2H), 7.31 (t, *J* = 7.5 Hz, 2H), 7.22 (t, *J* = 7.3 Hz, 1H), 6.94 (s, 1H), 6.91 (d, *J* = 8.4 Hz, 1H), 6.82 (d, *J* = 8.2 Hz, 1H), 6.48 (d, *J* = 15.8 Hz, 1H), 6.42 (d, *J* = 15.7 Hz, 1H), 6.34–6.27 (m, 1H), 6.23–6.09 (m, 1H), 3.90 (s, 3H), 3.88 (s, 3H), 3.12 (t, *J* = 6.1 Hz, 2H). **<sup>13</sup>C NMR** (150 MHz, CDCl<sub>3</sub>) δ 149.12, 148.55, 137.68, 131.07, 130.83, 130.76, 128.65, 128.52, 127.21, 126.43, 126.18, 119.14, 111.27, 108.71, 56.05, 55.92, 36.29. **HRMS** calcd. for C<sub>19</sub>H<sub>20</sub>O<sub>2</sub>Na<sup>+</sup> [*M*+*Na*]<sup>+</sup>: 303.1356, Found: 303.1360.



**ethyl (*E*)-2-(benzothiazol-2-ylsulfonyl)-5-phenylpent-4-enoate (**12-I**):** The title compound was

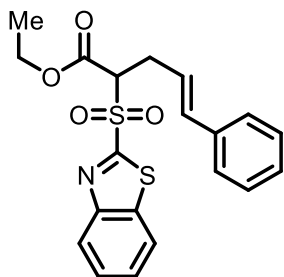

**12-I**

prepared following a literature procedure.<sup>16</sup> To a flame-dried 10-mL round-bottom flask equipped with a stir bar was added (*E*)-2-((4-phenylbut-3-en-1-yl)sulfonyl)benzothiazole (**9**) (0.100 mmol, 1 equiv) in THF (1 mL, 0.1 M) and cooled to  $-78^{\circ}\text{C}$ . LiHMDS (0.1 mL, 2.2 equiv; 1 M sol. in THF) was added followed quickly by ethyl carbonocyanidate (0.120 mmol, 1.2 equiv). The reaction was allowed to stir at  $-78^{\circ}\text{C}$  for 30 min. The solution was warmed to  $0^{\circ}\text{C}$  in an ice bath within 1 h and stirred for an additional 1 h before addition of a saturated aqueous solution of  $\text{NH}_4\text{Cl}$  (10 mL) was

added. The aqueous layer was extracted with  $\text{Et}_2\text{O}$  ( $3 \times 5$  mL), and the combined organic layers were dried with  $\text{Na}_2\text{SO}_4$ . The solvent was removed *in vacuo*, and the crude residue was purified by preparative TLC (40%  $\text{EtOAc}$ /hexanes). Purification afforded **12-I** as a yellow solid (40.1 mg, >95%).  $^1\text{H NMR}$  (600 MHz,  $\text{CDCl}_3$ )  $\delta$  8.25 (d,  $J = 8.2$  Hz, 1H), 8.00 (d,  $J = 8.1$  Hz, 1H), 7.65 (t,  $J = 7.4$  Hz, 1H), 7.61 (t,  $J = 7.5$  Hz, 1H), 7.26 (d,  $J = 1.8$  Hz, 4H), 7.24–7.19 (m, 1H), 6.53 (d,  $J = 15.7$  Hz, 1H), 6.07 (dt,  $J = 15.2, 7.2$  Hz, 1H), 4.60 (dd,  $J = 9.6, 5.2$  Hz, 1H), 4.16 (qq,  $J = 7.4, 3.7$  Hz, 2H), 3.21–3.09 (m, 2H), 1.09 (t,  $J = 7.1$  Hz, 3H).  $^{13}\text{C NMR}$  (150 MHz,  $\text{CDCl}_3$ )  $\delta$  164.52, 164.39, 152.79, 137.33, 136.56, 134.81, 128.69, 128.43, 127.95, 127.92, 126.41, 125.85, 122.58, 122.43, 69.40, 62.89, 29.93, 13.98. **HRMS** calcd. for  $\text{C}_{20}\text{H}_{20}\text{NO}_4\text{S}_2^+$   $[\text{M}+\text{H}]^+$ : 402.0834, Found: 402.0833.

**ethyl (*E*)-5-phenylpent-4-enoate (**12**):** The title compound was prepared following a literature

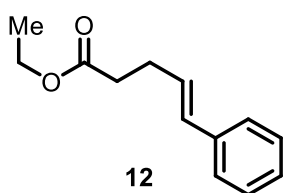

**12**

procedure.<sup>16</sup> To a 10-mL round-bottom flask equipped with a stirbar was added ethyl (*E*)-2-(benzothiazol-2-ylsulfonyl)-5-phenylpent-4-enoate (**12-I**) (0.100 mmol, 1 equiv) in THF (1 mL, 0.1 M). Zinc dust (0.500 mmol, 5 equiv) was added, and the reaction mixture was cooled to  $0^{\circ}\text{C}$ .  $\text{AcOH}$  (0.5 mL, excess) was added, and the reaction was allowed to warm to room

temperature and stir for 8 h.  $\text{EtOAc}$  (10 mL) was added, and the crude mixture was filtered through a pad of Celite, which was washed with  $\text{EtOAc}$ . The combined filtrates were washed with brine (10 mL) and the organic layer was dried with  $\text{Na}_2\text{SO}_4$ . The solvent was removed *in vacuo*, and the crude residue was purified by preparative TLC (5%  $\text{EtOAc}$ /hexanes). Purification afforded **12** as a yellow oil (17.4 mg, 85%).  $^1\text{H NMR}$  (600 MHz,  $\text{CDCl}_3$ )  $\delta$  7.33 (d,  $J = 7.5$  Hz, 2H), 7.29 (t,  $J = 7.6$  Hz, 2H), 7.20 (t,  $J = 7.2$  Hz, 1H), 6.43 (d,  $J = 15.8$  Hz, 1H), 6.21 (dt,  $J = 15.8, 6.7$  Hz, 1H), 4.15 (q,  $J = 7.1$  Hz, 2H), 2.54 (q,  $J = 7.2$  Hz, 2H), 2.48 (t,  $J = 7.0$  Hz, 2H), 1.29–1.22 (m, 3H).  $^{13}\text{C NMR}$  (150 MHz,  $\text{CDCl}_3$ )  $\delta$  173.14, 137.54, 131.08, 128.65, 127.27, 126.20, 60.55, 34.23, 29.86, 28.46, 14.42. **HRMS** calcd. for  $\text{C}_{13}\text{H}_{17}\text{O}_2^+$   $[\text{M}+\text{H}]^+$ : 205.1229, Found: 205.1230.

**(*E*)-2-((4-phenylbut-3-en-1-yl)sulfinyl)benzothiazole (**13**):** To a 25-mL round-bottom flask

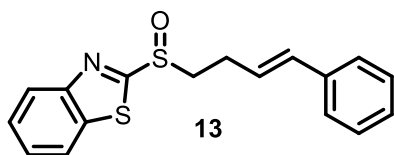

**13**

equipped with a magnetic stir bar was charged (*E*)-2-((4-phenylbut-3-en-1-yl)thio)benzothiazole (**2a**) (0.500 mmol, 1 equiv) and  $\text{DCM}$  (5 mL, 0.1 M). The mixture was cooled to  $0^{\circ}\text{C}$ . A solution of  $\text{mCPBA}$  (0.5 mmol, 1 equiv) in  $\text{DCM}$  (5 mL, 0.1 M)

was then added dropwise. The reaction was stirred for 4 h. The organic materials were separated by

addition of H<sub>2</sub>O (25 mL), followed by extraction with EtOAc (3 × 10 mL). The organic layer was dried over Na<sub>2</sub>SO<sub>4</sub>, and after filtration the crude residue was purified by SiO<sub>2</sub> gel column chromatography (40% EtOAc/hexanes). Purification afforded **13** as a white solid (131 mg, 82%). <sup>1</sup>H NMR (600 MHz, CDCl<sub>3</sub>) δ 8.07 (d, *J* = 8.2 Hz, 1H), 7.99 (d, *J* = 8.1 Hz, 1H), 7.59–7.55 (m, 1H), 7.49 (t, *J* = 7.8 Hz, 1H), 7.27–7.17 (m, 5H), 6.49 (d, *J* = 15.7 Hz, 1H), 6.15 (dt, *J* = 15.7, 7.0 Hz, 1H), 3.42 (ddd, *J* = 13.3, 9.1, 6.6 Hz, 1H), 3.35 (ddd, *J* = 13.8, 8.9, 5.7 Hz, 1H), 2.88 (h, *J* = 8.5, 7.8 Hz, 1H), 2.66 (dt, *J* = 14.9, 8.1 Hz, 1H). <sup>13</sup>C NMR (150 MHz, CDCl<sub>3</sub>) δ 177.56, 154.10, 136.86, 136.19, 133.09, 128.66, 127.64, 127.09, 126.33, 126.25, 125.67, 124.07, 122.42, 55.91, 25.10. HRMS calcd. for C<sub>17</sub>H<sub>16</sub>NOS<sub>2</sub><sup>+</sup> [M+H]<sup>+</sup>: 314.0668, Found: 314.0672.

**(E)-benzothiazol-2-yl(imino)(4-phenylbut-3-en-1-yl)-λ<sup>6</sup>-sulfanone (14):** The title compound was prepared following a literature procedure.<sup>17</sup> To a 4-mL vial equipped with a magnetic stir bar were added (*E*)-2-((4-phenylbut-3-en-1-yl)sulfinyl)benzothiazole (**13**) (0.100 mmol, 1 equiv), PhI(OAc)<sub>2</sub> (0.300 mmol, 3 equiv), and ammonium acetate (0.600 mmol, 6 equiv). The reagents were dissolved in MeOH (1 mL, 0.1 M) and allowed to stir at room temperature for 30 min. The solvent was removed *in vacuo*, and the crude residue was purified by preparative TLC (5% EtOAc/hexanes). Purification afforded **14** as a yellow solid (20 mg, 61%).

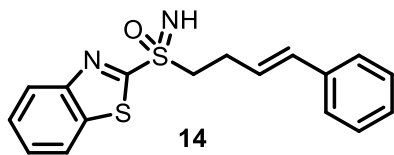

<sup>1</sup>H NMR (600 MHz, CDCl<sub>3</sub>) δ 8.23 (d, *J* = 8.3 Hz, 1H), 7.98 (d, *J* = 8.1 Hz, 1H), 7.60 (dt, *J* = 38.0, 7.5 Hz, 2H), 7.23 (td, *J* = 12.5, 11.3, 7.4 Hz, 5H), 6.45 (d, *J* = 15.8 Hz, 1H), 6.10 (dt, *J* = 15.8, 6.9 Hz, 1H), 3.70 (qdd, *J* = 14.5, 9.7, 6.0 Hz, 2H), 3.45 (s, 1H), 2.86 (dh, *J* = 30.9, 8.1, 7.4 Hz, 2H). <sup>13</sup>C NMR (150 MHz, CDCl<sub>3</sub>) δ 169.68, 153.15, 137.73, 136.70, 132.91, 128.63, 127.81, 127.66, 127.58, 126.21, 125.46, 124.90, 122.39, 55.57, 26.67. HRMS calcd. for C<sub>17</sub>H<sub>17</sub>N<sub>2</sub>OS<sub>2</sub><sup>+</sup> [M+H]<sup>+</sup>: 329.0782, Found: 329.0780.

**ethyl (E)-3-(2-((benzothiazol-2-ylsulfonyl)methyl)phenyl)acrylate (15):** To a 10-mL round-bottom flask equipped with a magnetic stir bar were added ethyl (*E*)-3-(2-((benzothiazol-2-ylthio)methyl)phenyl)acrylate (**6a**) (0.1 mmol, 1 equiv), 30% aqueous H<sub>2</sub>O<sub>2</sub> (0.2 mL, 6 equiv), ammonium heptamolybdate tetrahydrate (0.005 mmol, 5 mol%), and ethanol (2 mL, 0.05 M). The reaction was stirred at room temperature for 12 h. The organic materials were separated by addition of H<sub>2</sub>O (25 mL), followed by extraction with EtOAc (3 × 10 mL). The organic solution was washed with brine (10 mL)

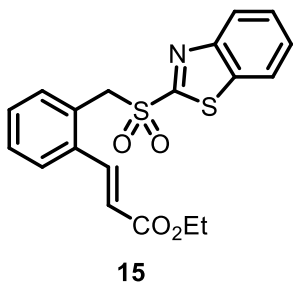

and dried over Na<sub>2</sub>SO<sub>4</sub>. After filtration, the solvent was removed *in vacuo*, and **15** was obtained as a white solid (29 mg, >95%). <sup>1</sup>H NMR (600 MHz, CDCl<sub>3</sub>) δ 8.21 (d, *J* = 8.2 Hz, 1H), 7.93 (dd, *J* = 7.8, 1.2 Hz, 1H), 7.83 (d, *J* = 15.7 Hz, 1H), 7.63 (ddd, *J* = 8.3, 7.1, 1.3 Hz, 1H), 7.57 (ddd, *J* = 8.3, 7.1, 1.2 Hz, 1H), 7.50 (dd, *J* = 7.5, 1.6 Hz, 1H), 7.40–7.32 (m, 3H), 6.07 (d, *J* = 15.6 Hz, 1H), 4.91 (s, 2H), 4.19 (q, *J* = 7.2 Hz, 2H), 1.31 (t, *J* = 7.2 Hz, 3H). <sup>13</sup>C NMR (150 MHz, CDCl<sub>3</sub>) δ 166.04, 164.56, 152.79, 140.25, 137.52, 135.72, 133.21, 130.27, 130.01, 128.18, 127.74, 127.43, 125.90, 125.80, 125.77, 122.31, 121.75, 60.73, 58.17, 14.42. HRMS calcd. for C<sub>19</sub>H<sub>18</sub>NO<sub>4</sub>S<sub>2</sub><sup>+</sup> [M+H]<sup>+</sup>: 388.0672, Found: 388.0681.

**ethyl (*E*)-3-(2-((benzothiazol-2-ylsulfonyl)methyl)phenyl)acrylate (**16**):** A solution of LDA in THF (0.100 mmol, 2.5M) was cooled to  $-78^{\circ}\text{C}$  and added dropwise to a precooled solution of ethyl (*E*)-3-(2-((benzothiazol-2-ylsulfonyl)methyl)phenyl)acrylate (**15**) (0.100 mmol, 1 equiv) and 3,4-dimethoxybenzaldehyde (0.090 mmol, 0.9 equiv) in THF (0.9 mL, 0.2 M). The reaction was stirred for 90 min at  $-78^{\circ}\text{C}$ , during which time it turned a bright orange color. The reaction was then warmed to room temperature and stirred for 30 min, at which point it turned yellow. The organic solution was diluted with Et<sub>2</sub>O (5 mL) and washed with brine (5 mL). The aqueous layer was extracted with Et<sub>2</sub>O (3 × 5 mL), combined with the organic layer, and dried with Na<sub>2</sub>SO<sub>4</sub>. The solvent was removed *in vacuo*. The crude residue was purified by mass-directed prep LC. The crude material was purified on a Waters Autopurification LC with a Waters BEH C18 column (19×160 mm, 5 mm) using a 0.1% aqueous formic acid:acetonitrile gradient (30 mL/min, main segment of gradient at 65–95% acetonitrile over 8 min) at ambient temperature. Fractionation was triggered by a Waters QDa single quadrupole mass spec in ESI+ ( $m/z = 339.2$  [M+H], cone voltage 15V). Purification afforded **16** as a yellow solid (47.6 mg, 78%). <sup>1</sup>H NMR (600 MHz, CDCl<sub>3</sub>) δ 8.13 (d,  $J = 15.8$  Hz, 1H), 7.59 (dd,  $J = 8.0, 1.2$  Hz, 1H), 7.56 (dd,  $J = 7.9, 1.3$  Hz, 1H), 7.38 (td,  $J = 7.6, 1.3$  Hz, 1H), 7.31–7.26 (m, 3H), 7.11–7.06 (m, 2H), 6.93 (d,  $J = 16.0$  Hz, 1H), 6.88 (d,  $J = 8.2$  Hz, 1H), 6.38 (d,  $J = 15.8$  Hz, 1H), 4.28 (q,  $J = 7.2$  Hz, 2H), 3.96 (s, 3H), 3.92 (s, 3H), 1.34 (t,  $J = 7.1$  Hz, 3H). <sup>13</sup>C NMR (150 MHz, CDCl<sub>3</sub>) δ 167.07, 149.45, 149.31, 142.61, 137.94, 132.79, 132.64, 130.42, 130.16, 127.61, 127.41, 127.00, 123.79, 120.40, 120.35, 111.39, 109.31, 60.67, 56.13, 14.49. HRMS calcd. for C<sub>21</sub>H<sub>23</sub>O<sub>4</sub><sup>+</sup> [M+H]<sup>+</sup>: 339.1591, Found: 339.1599.

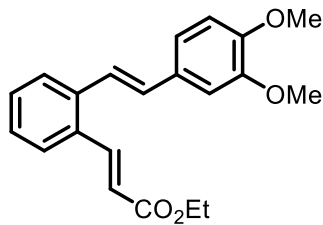

**16**

## Formal Synthesis of (+)-Salvianolic Acid A and Salvianolic Acid F

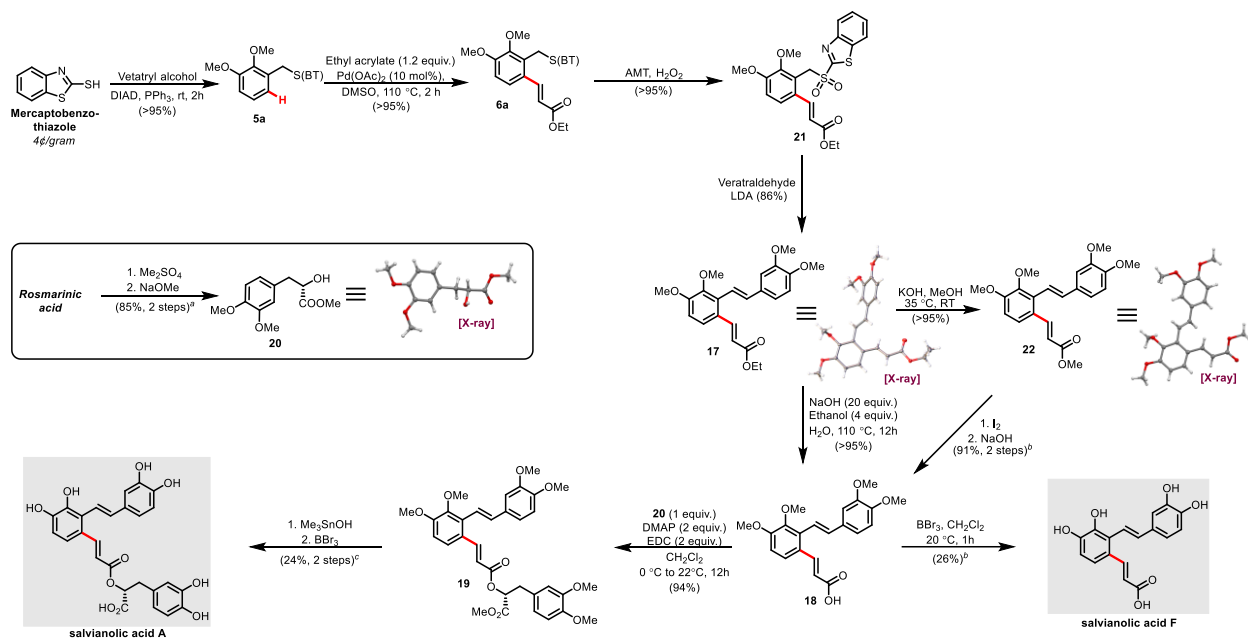

**Scheme S9.** Total Synthesis of (+)-salvianolic acid A and salvianolic acid F

<sup>a</sup>Rosmarinic acid global methylation and hydrolysis was performed according to a literature procedure (Ref. 18). <sup>b</sup>Ester demethylation and global salvianolic acid F demethylation were performed according to a literature procedure (Ref. 19). <sup>c</sup>Global salvianolic acid A demethylation was performed according to a literature procedure (Ref. 20).

## Characterization Data for Total Synthesis

**ethyl (*E*)-3-(2-((*E*)-3,4-dimethoxystyryl)-3,4-dimethoxyphenyl)acrylate (**17**):** In a 100-mL round-bottom flask, solution of LDA in THF (4.830 mmol, 2.5M) was cooled to  $-78\text{ }^{\circ}\text{C}$  and added dropwise to a precooled solution of ethyl (*E*)-3-(2-((benzothiazol-2-ylsulfonyl)methyl)-3,4-dimethoxyphenyl)acrylate (**21**) (4.830 mmol, 1.0 equiv) and 3,4-dimethoxybenzaldehyde (4.830 mmol, 1.0 equiv) in THF (48 mL, 0.1 M). The reaction was stirred for 90 min at  $-78\text{ }^{\circ}\text{C}$ , during which it turned a bright orange color. The reaction was then warmed to room temperature and stirred for 30 min, at which point it turned yellow. The organic solution was diluted with Et<sub>2</sub>O (5 mL) and washed with brine (5 mL). The aqueous layer was

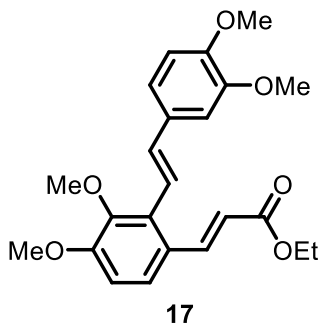

extracted with Et<sub>2</sub>O (3 × 5 mL), combined with the organic layer, and dried with Na<sub>2</sub>SO<sub>4</sub>. The solvent was removed *in vacuo*. The crude residue was purified by SiO<sub>2</sub> gel column chromatography (25% EtO<sub>2</sub>/toluene). Purification afforded **17** as a yellow solid (1.66 g, 86%). <sup>1</sup>H NMR (600 MHz, CDCl<sub>3</sub>) δ 8.03 (d, *J* = 15.8 Hz, 1H), 7.39 (d, *J* = 8.6 Hz, 1H), 7.19 (d, *J* = 16.4 Hz, 1H), 7.13–7.04 (m, 2H), 6.90 (d, *J* = 8.4 Hz, 2H), 6.75 (d, *J* = 16.4 Hz, 1H), 6.32 (d, *J* = 15.8 Hz, 1H), 4.26 (q, *J* = 7.1 Hz, 2H), 3.98 (s, 3H), 3.94 (s, 3H), 3.94 (s, 3H), 3.81 (s, 3H), 1.32 (t, *J* = 7.1 Hz, 3H). <sup>13</sup>C NMR (150 MHz, CDCl<sub>3</sub>) δ 167.27, 153.97, 149.42, 149.27, 147.08, 144.03, 137.19, 133.36, 130.72, 126.80, 123.98, 120.31, 119.83, 117.75, 111.33, 111.24, 109.19, 60.61, 60.40, 56.14, 56.10, 56.04, 14.50. HRMS calcd. for C<sub>23</sub>H<sub>27</sub>O<sub>6</sub><sup>+</sup> [M+H]<sup>+</sup>: 399.1802, Found: 399.1812. X-ray (single-crystal) Yellow blocks of X-ray diffraction quality were obtained by vapor diffusion of ether into a saturated solution of **17** in acetonitrile (CCDC 1905651).<sup>23</sup>

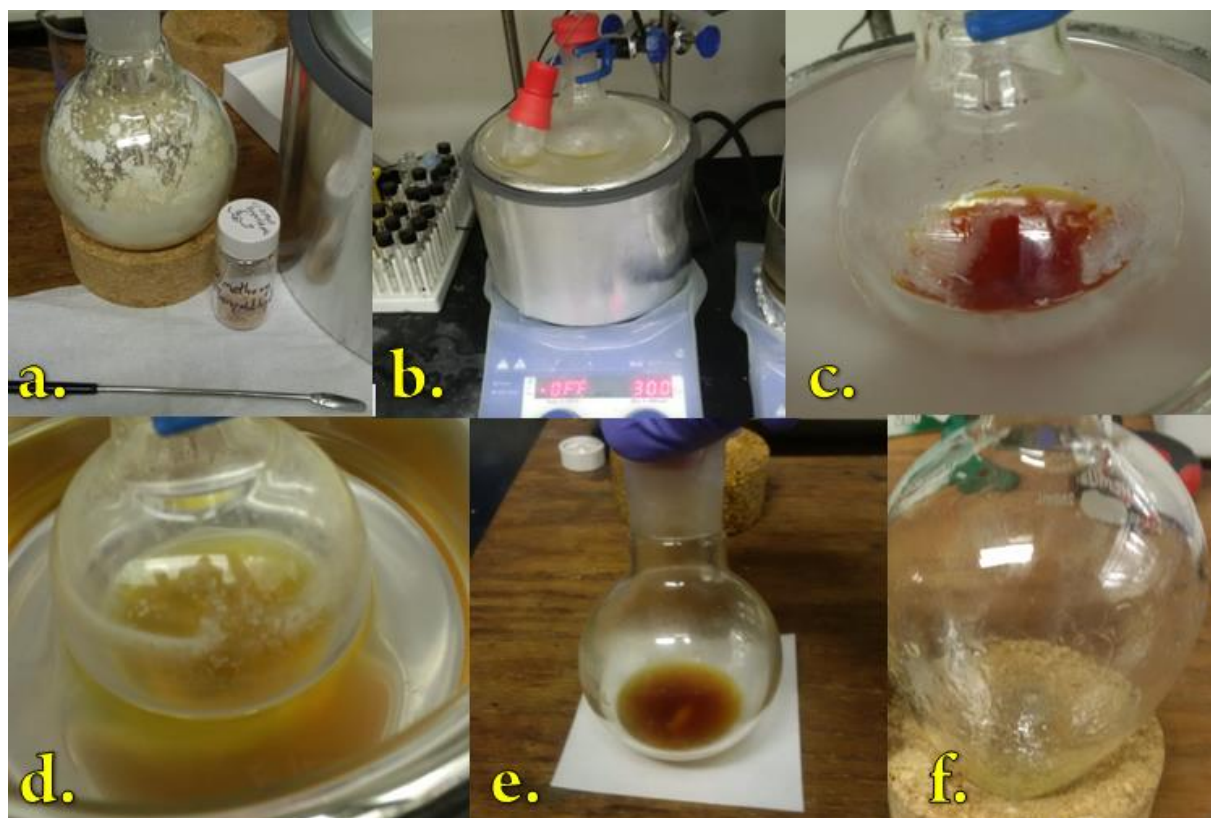

**Figure S8.** From left to right: a) preparation of materials. b) reaction at 0 min before mixing LDA and starting materials. c) reaction at 10m. d) reaction at 2h after warming to room temperature. e) crude reaction mixture after heating. f) pure product (**17**).

**(E)-3-(2-((E)-3,4-dimethoxystyryl)-3,4-dimethoxyphenyl)acrylic acid (18):** To a 50-mL round-bottom flask were added ethyl (E)-3-(2-((E)-3,4-dimethoxystyryl)-3,4-dimethoxyphenyl)acrylate (**17**) (0.440 mmol, 1 equiv), NaOH (8.8 mmol, 20 equiv), and ethanol (2 mL, 1M). The mixture was quenched with water (18 mL) and acidified to pH = 2 with hydrochloric acid. The solution was then extracted with ethyl acetate (3 × 50 mL) and dried with NaSO<sub>4</sub>. After filtration, the solvent was removed *in vacuo*. Workup afforded **18** as a yellow solid (163 mg, >95%). <sup>1</sup>H NMR (600 MHz, CDCl<sub>3</sub>) δ 8.10 (d, *J* = 15.8 Hz, 1H), 7.40 (d, *J* = 8.7 Hz, 1H), 7.18 (d, *J* = 16.4 Hz, 1H), 7.08 (d, *J* = 7.7 Hz, 2H), 6.88 (dd, *J* = 11.3, 8.4 Hz, 2H), 6.68 (d, *J* = 16.4 Hz, 1H), 6.30 (d, *J* = 15.7 Hz, 1H), 3.95 (s, 3H), 3.93 (s, 3H), 3.91 (s, 3H), 3.80 (s, 3H). <sup>13</sup>C NMR (150 MHz, CDCl<sub>3</sub>) δ 172.19, 154.30, 149.50, 149.30, 147.08, 146.51, 137.57, 133.80, 130.59, 126.32, 124.31, 120.32, 119.75, 116.44, 111.38, 111.29, 109.25, 60.66, 56.14, 56.11, 56.06. HRMS calcd. for C<sub>21</sub>H<sub>23</sub>O<sub>6</sub><sup>+</sup> [M+H]<sup>+</sup>: 371.1489, Found: 371.1499.

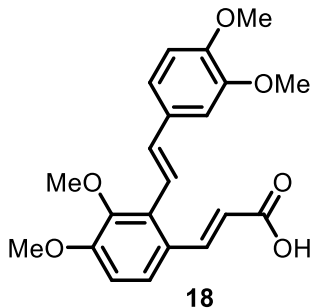

**(R)-3-(3,4-dimethoxyphenyl)-1-methoxy-1-oxopropan-2-yl** **(E)-3-(2-((E)-3,4-dimethoxystyryl)-3,4-dimethoxyphenyl)acrylate (19):** To a 100-mL round-bottom flask with (E)-3-(2-((E)-3,4-dimethoxystyryl)-3,4-dimethoxyphenyl)acrylic acid (**18**) (0.270 mmol, 1 equiv), DMAP (0.540 mmol, 2 equiv) and methyl (R)-3-(3,4-dimethoxyphenyl)-2-hydroxypropanoate (**20**) (0.540 mmol, 2 equiv) in CH<sub>2</sub>Cl<sub>2</sub> (10 mL, 27 mM) at 0° C was added EDC•HCl (0.540 mmol, 2 equiv). The reaction mixture was slowly warmed up to room temperature and stirred overnight. After cooling the reaction mixture to 0° C, 2.0 N HCl solution (20 mL) was added. The aqueous layer was extracted with Et<sub>2</sub>O (3 × 20 mL) and dried with Na<sub>2</sub>SO<sub>4</sub>. The crude residue was purified by SiO<sub>2</sub> gel column chromatography (5% Et<sub>2</sub>O/CH<sub>2</sub>Cl<sub>2</sub>). Purification afforded **19** as a white foam (151 mg, 94%). <sup>1</sup>H NMR (600 MHz, CDCl<sub>3</sub>) δ 8.06 (d, *J* = 15.9 Hz, 1H), 7.37 (d, *J* = 8.7 Hz, 1H), 7.17 (d, *J* = 16.4 Hz, 1H), 7.08 (dd, *J* = 4.4, 2.5 Hz, 2H), 6.87 (dd, *J* = 10.4, 8.7 Hz, 2H), 6.76–6.66 (m, 4H), 6.32 (d, *J* = 15.8 Hz, 1H), 5.30 (dd, *J* = 8.2, 4.6 Hz, 1H), 3.93 (s, 3H), 3.92 (s, 3H), 3.90 (s, 3H), 3.81 (s, 6H), 3.79 (s, 3H), 3.71 (s, 3H), 3.16–3.05 (m, 2H). <sup>13</sup>C NMR (150 MHz, CDCl<sub>3</sub>) δ 170.39, 166.26, 154.10, 149.34, 149.15, 148.77, 148.04, 146.94, 145.39, 137.35, 133.49, 130.48, 128.39, 126.26, 123.98, 121.47, 120.07, 119.52, 116.09, 112.45, 111.23, 111.16, 111.13, 109.27, 73.07, 60.51, 55.99, 55.97, 55.91, 55.90, 55.82, 52.27, 37.19. HRMS calcd. for C<sub>33</sub>H<sub>36</sub>O<sub>10</sub>Na<sup>+</sup> [M+Na]<sup>+</sup>: 615.2201, Found: 615.2208.

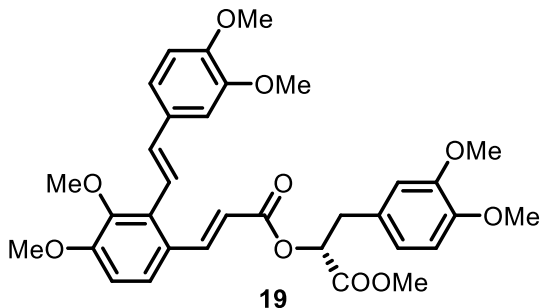

reaction mixture to 0° C, 2.0 N HCl solution (20 mL) was added. The aqueous layer was extracted with Et<sub>2</sub>O (3 × 20 mL) and dried with Na<sub>2</sub>SO<sub>4</sub>. The crude residue was purified by SiO<sub>2</sub> gel column chromatography (5% Et<sub>2</sub>O/CH<sub>2</sub>Cl<sub>2</sub>). Purification afforded **19** as a white foam (151 mg, 94%). <sup>1</sup>H NMR (600 MHz, CDCl<sub>3</sub>) δ 8.06 (d, *J* = 15.9 Hz, 1H), 7.37 (d, *J* = 8.7 Hz, 1H), 7.17 (d, *J* = 16.4 Hz, 1H), 7.08 (dd, *J* = 4.4, 2.5 Hz, 2H), 6.87 (dd, *J* = 10.4, 8.7 Hz, 2H), 6.76–6.66 (m, 4H), 6.32 (d, *J* = 15.8 Hz, 1H), 5.30 (dd, *J* = 8.2, 4.6 Hz, 1H), 3.93 (s, 3H), 3.92 (s, 3H), 3.90 (s, 3H), 3.81 (s, 6H), 3.79 (s, 3H), 3.71 (s, 3H), 3.16–3.05 (m, 2H). <sup>13</sup>C NMR (150 MHz, CDCl<sub>3</sub>) δ 170.39, 166.26, 154.10, 149.34, 149.15, 148.77, 148.04, 146.94, 145.39, 137.35, 133.49, 130.48, 128.39, 126.26, 123.98, 121.47, 120.07, 119.52, 116.09, 112.45, 111.23, 111.16, 111.13, 109.27, 73.07, 60.51, 55.99, 55.97, 55.91, 55.90, 55.82, 52.27, 37.19. HRMS calcd. for C<sub>33</sub>H<sub>36</sub>O<sub>10</sub>Na<sup>+</sup> [M+Na]<sup>+</sup>: 615.2201, Found: 615.2208.

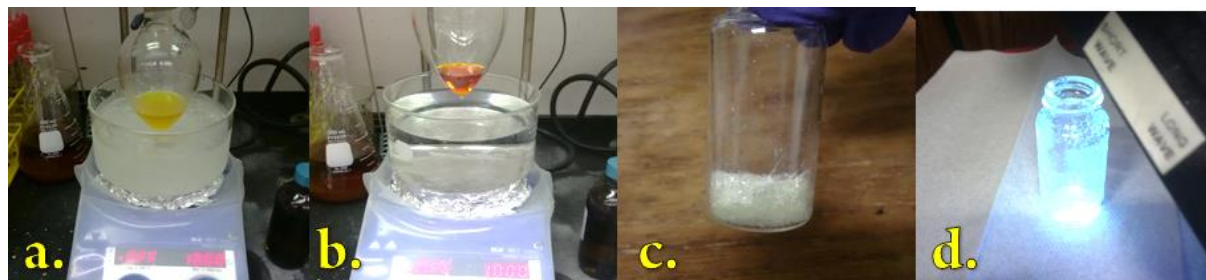

**Figure S9.** From left to right: a) Reaction at 0 h and at 0 °C. b) reaction at 12 h and room temperature. c) pure product (**19**) under normal light. d) pure product (**19**) under UV-light.

**methyl (*R*)-3-(3,4-dimethoxyphenyl)-2-hydroxypropanoate (**20**):** The title compound was prepared following a literature procedure.<sup>18</sup> To a 500-mL round-bottom flask equipped with a magnetic stir bar and reflux condenser were added rosmarinic acid (2.8 mmol, 1 equiv), acetone (100 mL), dimethyl sulfate (30.2 mmol, 10.8 equiv), and potassium carbonate (30.200 mmol, 10.8 equiv). The reaction mixture was heated at reflux under N<sub>2</sub>. After 16 h, the reaction was cooled to room temperature and diluted with Et<sub>2</sub>O (50 mL) and saturated NH<sub>4</sub>Cl (50 mL). The layers were separated, and the aqueous layer was extracted with Et<sub>2</sub>O (3 × 50 mL). The combined organic layers were washed with brine and dried with Na<sub>2</sub>SO<sub>4</sub>. The solvent was removed *in vacuo*, and the crude residue was purified by SiO<sub>2</sub> gel column chromatography (10–40% Et<sub>2</sub>O/benzene) to afford pentamethyl rosmarinic acid as a light yellow foam. To the pentamethyl rosmarinic acid in a 50-mL round-bottom flask were added MeOH (20 mL) and NaOMe (2.800 mmol, 1 equiv) at room temperature under N<sub>2</sub>. After 2 h, saturated aqueous NH<sub>4</sub>Cl (20 mL) was added followed by extraction with EtOAc (3 × 50 mL). The combined organic layers were washed with brine and dried with Na<sub>2</sub>SO<sub>4</sub>. The solvent was removed *in vacuo*, and the crude residue was purified by SiO<sub>2</sub> gel column chromatography (1–10% Et<sub>2</sub>O/CH<sub>2</sub>Cl<sub>2</sub>) to afford **20** as a yellow solid (577 mg, 86%). **<sup>1</sup>H NMR** (600 MHz, CDCl<sub>3</sub>) δ 6.83–6.63 (m, 3H), 4.42 (td, *J* = 6.3, 4.0 Hz, 1H), 3.85 (s, 3H), 3.84 (s, 3H), 3.77 (d, *J* = 2.6 Hz, 3H), 3.06 (dt, *J* = 14.1, 3.4 Hz, 1H), 2.91 (dd, *J* = 14.1, 6.6 Hz, 1H), 2.74 (t, *J* = 4.6 Hz, 1H). **<sup>13</sup>C NMR** (150 MHz, CDCl<sub>3</sub>) δ 174.62, 148.89, 148.12, 128.83, 121.58, 112.79, 111.26, 71.48, 55.95, 55.92, 52.53, 40.21. **HRMS** calcd. for C<sub>12</sub>H<sub>17</sub>O<sub>5</sub><sup>+</sup> [M+H]<sup>+</sup>: 241.1071, Found: 241.1077. **X-ray** (single-crystal) Yellow blocks of X-ray diffraction quality were obtained by vapor diffusion of ether into a saturated solution of **20** in acetonitrile (CCDC 1905645).<sup>23</sup>

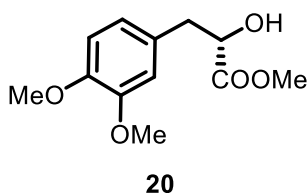

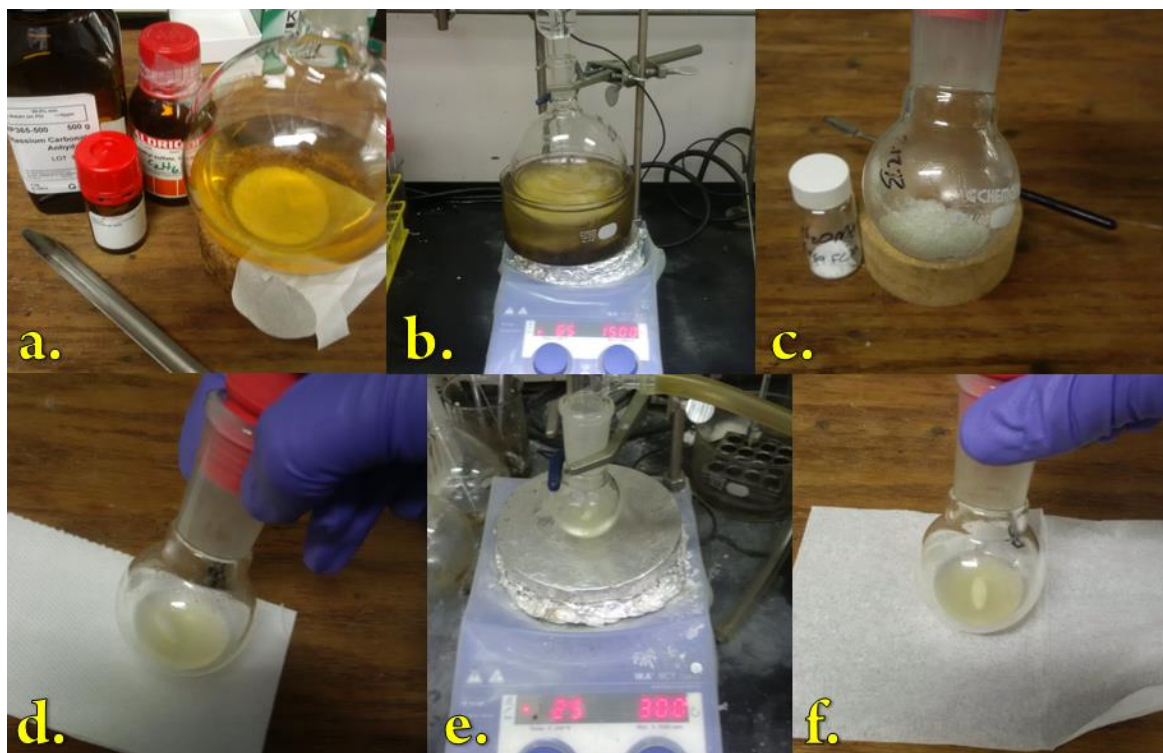

**Figure S10.** From left to right: a) preparation of materials. b) reaction at 16 h after heating. c) isolated pentamethylated rosmarinic acid. d) ester hydrolysis reaction at 0 h. e) ester hydrolysis at 1 h. f) crude reaction after 2 h containing **20**.

**ethyl (*E*)-3-(2-((benzothiazol-2-ylsulfonyl)methyl)-3,4-dimethoxyphenyl)acrylate (**21**):** To a 50-

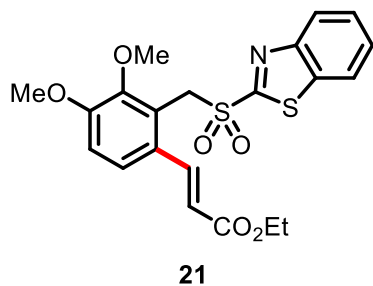

mL round-bottom flask equipped with a magnetic stir bar were added ethyl (*E*)-3-(2-((benzothiazol-2-ylthio)methyl)-3,4-dimethoxyphenyl)acrylate (**6a**) (5.2 mmol, 1 equiv), 30% aqueous H<sub>2</sub>O<sub>2</sub> (2.7 mL, 5 equiv), ammonium heptamolybdate tetrahydrate (0.26 mmol, 5 mol%), and ethanol (10.4 mL, 0.500 M). The reaction was stirred at room temperature for 12 h. The organic materials were separated by addition of H<sub>2</sub>O (100 mL), followed by extraction with

EtOAc (3 × 50 mL). The organic solution was washed with brine (50 mL) and dried over Na<sub>2</sub>SO<sub>4</sub>. After filtration, the solvent was removed *in vacuo*, and **21** was obtained as a yellow solid (2.33 g, >95%). <sup>1</sup>H NMR (600 MHz, CDCl<sub>3</sub>) δ 8.22 (dt, *J* = 8.3, 0.9 Hz, 1H), 7.96 (dt, *J* = 7.9, 1.1 Hz, 1H), 7.65–7.60 (m, 2H), 7.57 (ddd, *J* = 8.3, 7.1, 1.3 Hz, 1H), 7.28 (d, *J* = 8.7 Hz, 1H), 6.96 (d, *J* = 8.8 Hz, 1H), 5.96 (d, *J* = 15.5 Hz, 1H), 5.09 (s, 2H), 4.07 (q, *J* = 7.1 Hz, 2H), 3.98 (s, 3H), 3.89 (s, 3H), 1.25 (t, *J* = 7.2 Hz, 3H). <sup>13</sup>C NMR (150 MHz, CDCl<sub>3</sub>) δ 166.21, 165.36, 153.93, 152.97, 149.26, 140.30, 137.73, 128.39, 128.02, 127.61, 125.88, 122.77, 122.29, 120.52, 119.12, 113.94, 61.49, 60.47, 55.98, 52.90, 14.40. HRMS calcd. for C<sub>21</sub>H<sub>22</sub>NO<sub>6</sub>S<sub>2</sub><sup>+</sup> [M+H]<sup>+</sup>: 448.0883, Found: 448.0898.



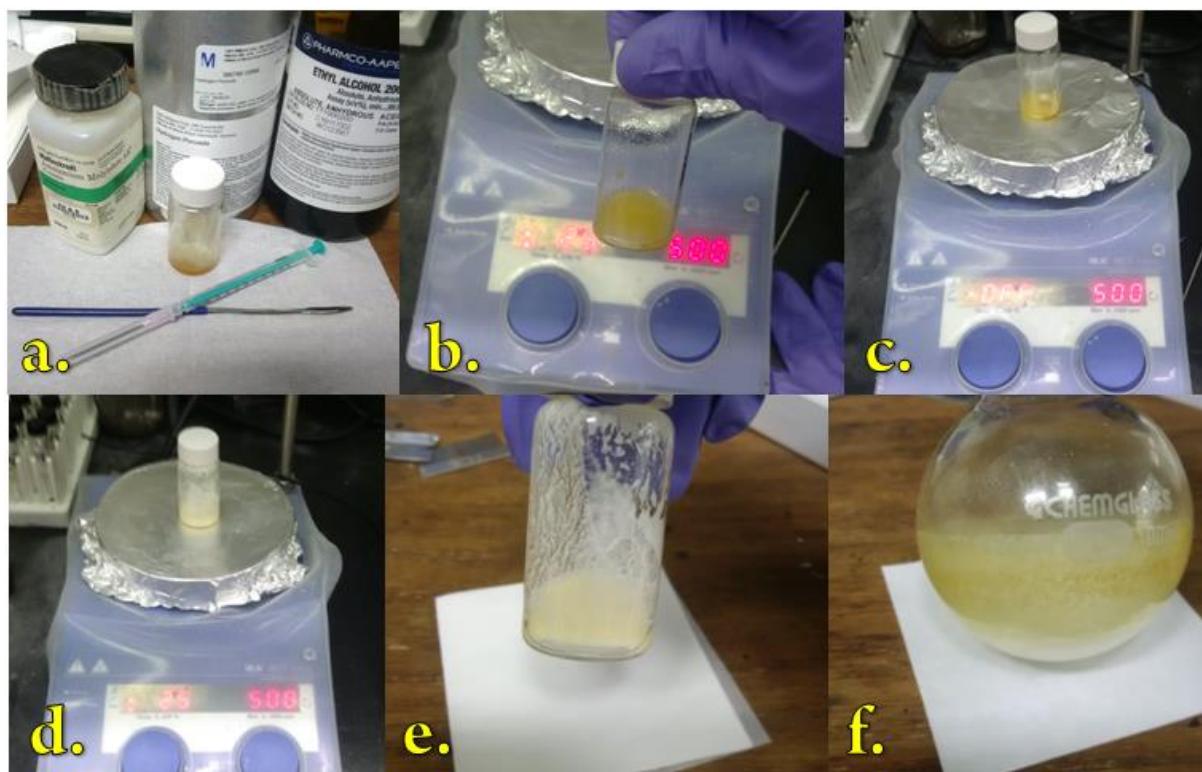

**Figure S11.** From left to right: a) preparation of materials for small-scale reaction (1 mmol). b) reaction at 0 m. c) vial being placed on stir plate. d) vial at 12 h. e) crude reaction mixture. f) pure product **21**.

**methyl (*E*)-3-(2-((*E*)-3,4-dimethoxystyryl)-3,4-dimethoxyphenyl)acrylate (**22**):** To a 1-dram (4

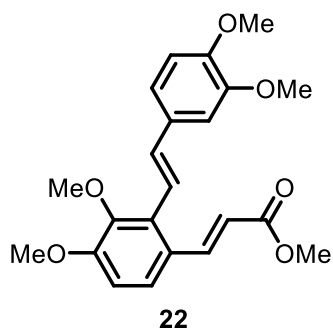

mL) vial equipped with a stir bar were added ethyl (*E*)-3-(2-((*E*)-3,4-dimethoxystyryl)-3,4-dimethoxyphenyl)acrylate (**17**) (0.100 mmol, 1 equiv), KOH (0.300 mmol, 3 equiv), and MeOH (1 mL, 0.1 M). The reaction was placed on a heating block that was pre-heated to 35 °C for 12 h. After 12 h, the reaction was brought to room temperature and treated with HCl until the solution reached pH = 2. The aqueous layer was extracted with ether (3 × 10 mL). The mixture was run through a pad of SiO<sub>2</sub> and the solvent was removed *in vacuo*. Workup afforded **22** as a yellow solid (37 mg, >95%). <sup>1</sup>H NMR (600 MHz, CDCl<sub>3</sub>) δ 8.00 (d, *J* = 15.8 Hz, 1H), 7.36 (d, *J* = 8.6 Hz, 1H), 7.17 (d, *J* = 16.4 Hz, 1H), 7.10–7.05 (m, 2H), 6.88 (d, *J* = 8.4 Hz, 2H), 6.71 (d, *J* = 16.4 Hz, 1H), 6.30 (d, *J* = 15.8 Hz, 1H), 3.96 (s, 3H), 3.91 (s, 6H), 3.79 (s, 3H), 3.77 (s, 3H). <sup>13</sup>C NMR (150 MHz, CDCl<sub>3</sub>) δ 167.68, 154.01, 149.43, 149.27, 147.08, 144.28, 137.22, 133.40, 130.71, 126.72, 124.01, 120.30, 119.86, 117.29, 111.34, 111.25, 109.23, 60.61, 56.14, 56.11, 56.03, 51.69. HRMS calcd. for C<sub>22</sub>H<sub>25</sub>O<sub>6</sub><sup>+</sup> [M+H]<sup>+</sup>: 385.1646, Found: 385.1663. X-ray (single-crystal) Yellow blocks of X-ray diffraction quality were obtained by vapor diffusion of ether into a saturated solution of **22** in acetonitrile (CCDC 1905648).<sup>23</sup>

## Preparation of Palladium Complexes

**Pd-1:** To a 1-dram (4 mL) vial equipped with a stir bar were added (*E*)-2-((4-phenylbut-3-en-1-yl)thio)benzothiazole (**2a**) (0.100 mmol, 1 equiv), palladium(II) trifluoroacetate (0.050 mmol, 0.5

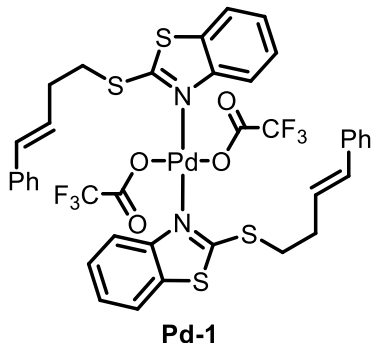

equiv) in DCE (1 mL, 0.1 M). The reaction was placed on a heating block that was preheated to 45 ° C for 4 h. After 4 h, the reaction was brought to room temperature and filtered through a 0.2 μm PTFE filter into a new 1-dram (4 mL) vial. The uncapped vial containing the crude mixture was placed inside a scintillation vial (20 mL) containing diethyl ether (2 mL). The scintillation vial was capped and allowed to sit undisturbed for 72 h. **X-ray** (single-crystal) Yellow blocks of X-ray diffraction quality were obtained by vapor diffusion of ether into a saturated solution of **Pd-1** in dichloroethane

(CCDC 1905654).<sup>23</sup>

**Pd-2:** To a 1-dram (4 mL) vial equipped with a stir bar were added 2-(benzylthio)benzothiazole (**5c**) (0.100 mmol, 1 equiv), palladium(II) trifluoroacetate (0.050 mmol, 0.5 equiv) in DCE (1 mL, 0.1

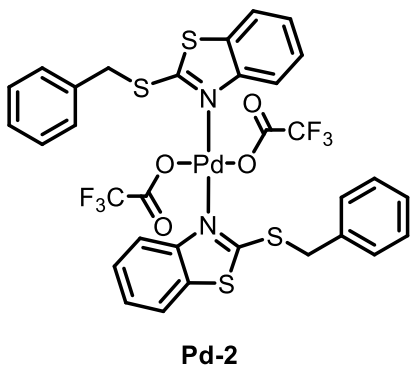

M). The reaction was placed on a heating block that was preheated to 45 ° C for 4 h. After 4 h, the reaction was brought to room temperature and filtered through a 0.2 μm PTFE filter into a new 1-dram (4 mL) vial. The uncapped vial containing the crude mixture was placed inside a scintillation vial (20 mL) containing diethyl ether (2 mL). The scintillation vial was capped and allowed to sit undisturbed for 72 h. **X-ray** (single-crystal) Yellow blocks of X-ray diffraction quality were obtained by vapor diffusion of ether into a saturated solution of **Pd-2** in

dichloroethane (CCDC 1905655).<sup>23</sup>

## **KINETICS PROCEDURES**

### *Kinetic Analysis of Oxidative Heck Reaction*

The kinetics trials for both (*E*)-**I** and (*Z*)-**I** same-excess experiments were performed with (1) a standard reaction under optimized conditions, (2) a reaction prepared as though 20 mM conversion had already occurred with no product present, and (3) a reaction at 20 mM conversion with 20 mM of the corresponding product present. Each of these reactions was set up from stock solutions in vials open to air and at the appropriate temperature (45 ° C or 65 ° C). At designated time intervals 40  $\mu$ L samples were removed from each reaction using a pipette and subsequently diluted in acetonitrile (0.5 mL) and filtered through a 0.2  $\mu$ m PTFE filter into 96-well plates. Within an hour of sampling the last time point, the 96-well plates were sampled via LCMS. The concentration of each reaction component (except the Pd-catalyst, which was not directly monitored during the reaction) was then determined from LCMS based on the internal standard (1,3,5-trimethoxybenzene).

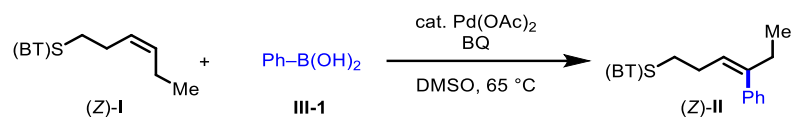

A<sup>a</sup>

|               | [(Z)-I] | [III-1] | [BQ]    | [(Z)-II] |
|---------------|---------|---------|---------|----------|
| standard      | 50.0 mM | 70.0 mM | 75.0 mM | 0 mM     |
| same-excess 1 | 30.0 mM | 50.0 mM | 55.0 mM | 0 mM     |
| same-excess 2 | 30.0 mM | 50.0 mM | 55.0 mM | 20.0 mM  |

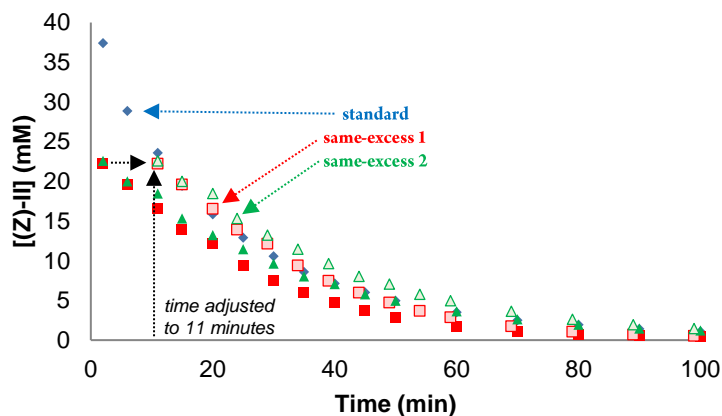

B<sup>b</sup>

|                    | [(Z)-I] | [III-1] | [BQ]    | [(Z)-II] |
|--------------------|---------|---------|---------|----------|
| standard           | 50.0 mM | 70.0 mM | 75.0 mM | 0 mM     |
| diff.-excess (Z)-I | 30.0 mM | 70.0 mM | 75.0 mM | 0 mM     |
| diff.-excess III-1 | 50.0 mM | 50.0 mM | 75.0 mM | 0 mM     |
| diff.-excess BQ    | 50.0 mM | 70.0 mM | 55.0 mM | 0 mM     |

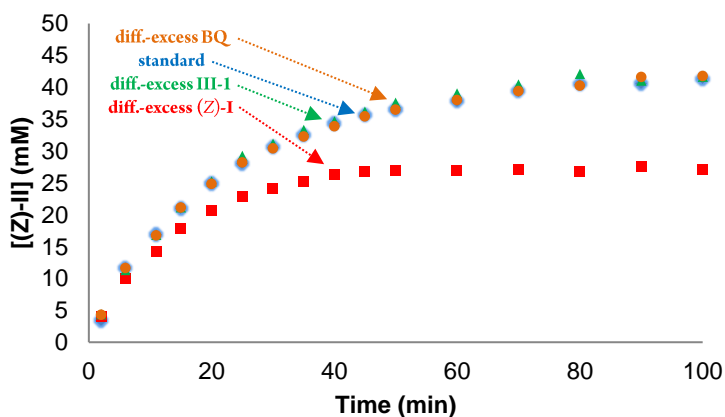

**Figure S12.** (A) Same-excess experiments with and without product. (B) Different-excess experiments of starting material, phenylboronic acid, and benzoquinone. <sup>a</sup>Due to the consumption of 1 equivalent of benzoquinone per turnover, reactions were set up with Pd(OAc)<sub>2</sub> (2.5 mM) and with (Z)-I (variable), III, BQ, and (Z)-II (for same-excess 3) corresponding to the expected amounts at time=80min for the standard reaction in DMSO (2.0 mL), at 65 °C, an in air. <sup>b</sup>Reaction conditions: (Z)-I (variable), III (variable), Benzoquinone (variable), Pd(OAc)<sub>2</sub> (variable), DMSO (2.0 mL), 65 °C, air.

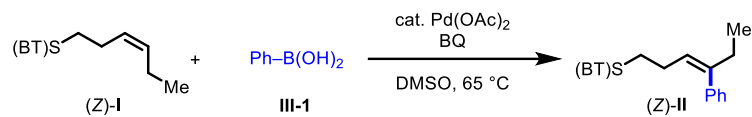

A<sup>a</sup>

|                 | [(Z)-I]        | [III-1]        | [BQ]           | [Pd(OAc) <sub>2</sub> ] |
|-----------------|----------------|----------------|----------------|-------------------------|
| <b>10 mol%</b>  | <b>50.0 mM</b> | <b>70.0 mM</b> | <b>75.0 mM</b> | <b>5.00 mM</b>          |
| <b>7.5 mol%</b> | 50.0 mM        | 70.0 mM        | 75.0 mM        | <b>3.75 mM</b>          |
| <b>5 mol%</b>   | 50.0 mM        | 70.0 mM        | 75.0 mM        | <b>2.50 mM</b>          |
| <b>4 mol%</b>   | 50.0 mM        | 70.0 mM        | 75.0 mM        | <b>2.00 mM</b>          |
| <b>3 mol%</b>   | 50.0 mM        | 70.0 mM        | 75.0 mM        | <b>2.50 mM</b>          |

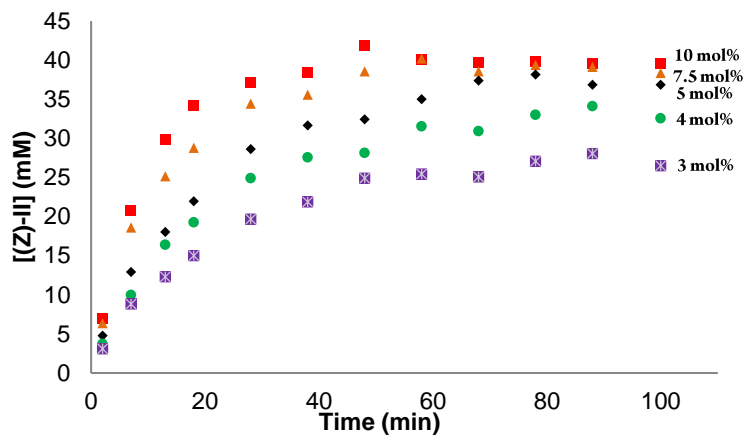

B<sup>b</sup>

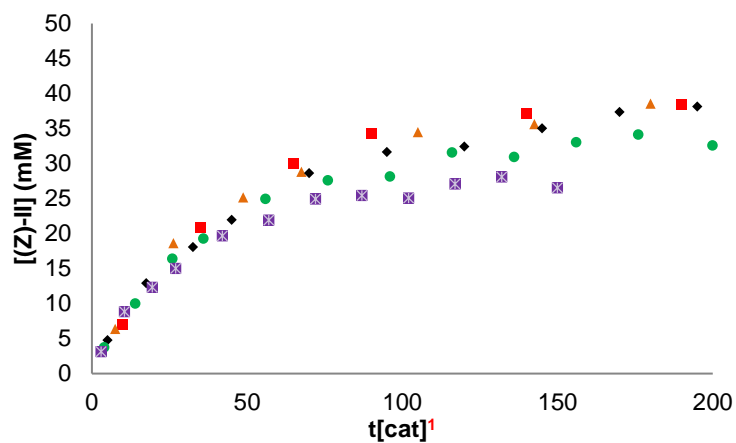

**Figure S13.** Reaction conditions (Z)-I (50 mM), **III-1** (70 mM), Benzoquinone (75 mM), Pd(OAc)<sub>2</sub> (variable), DMSO (2.0 mL), 65 °C, air.

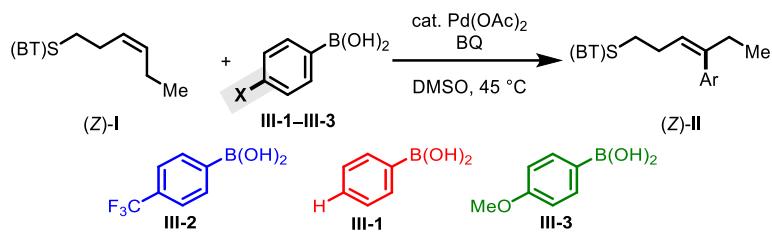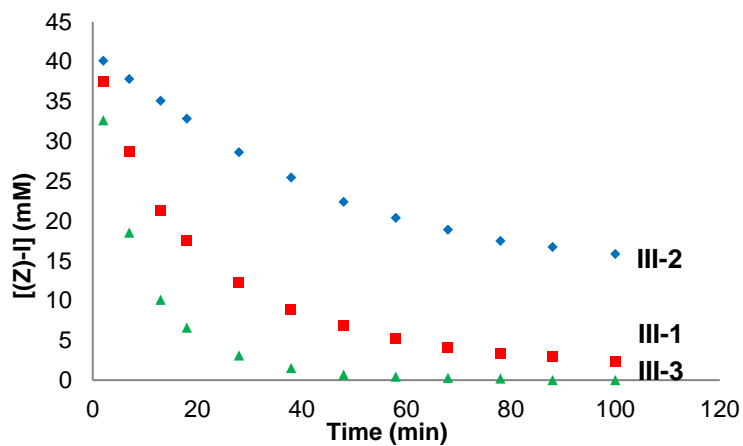

**Figure S14.** Reaction conditions (Z)-I (50 mM), III-1-3 (70 mM), Benzoquinone (75 mM), Pd(OAc)<sub>2</sub> (5 mol%), DMSO (2.0 mL), 65 °C, air.

## Kinetic Isotope Effect Experiment

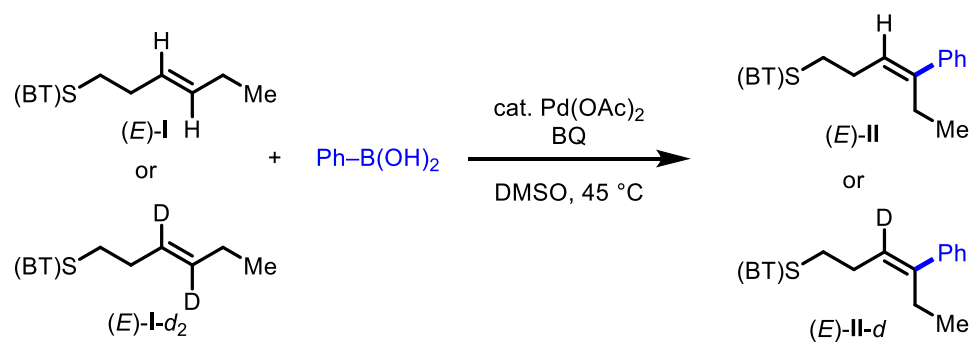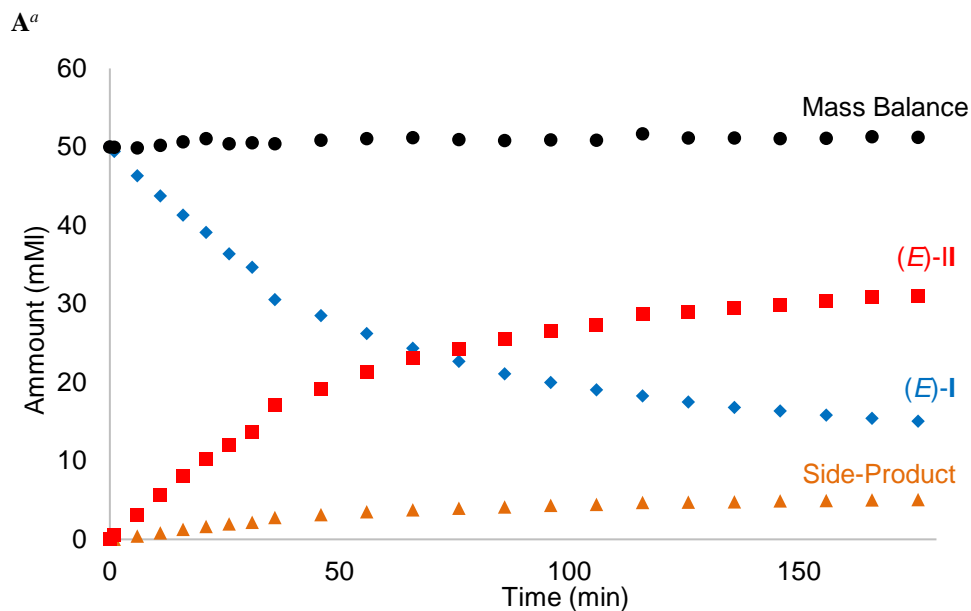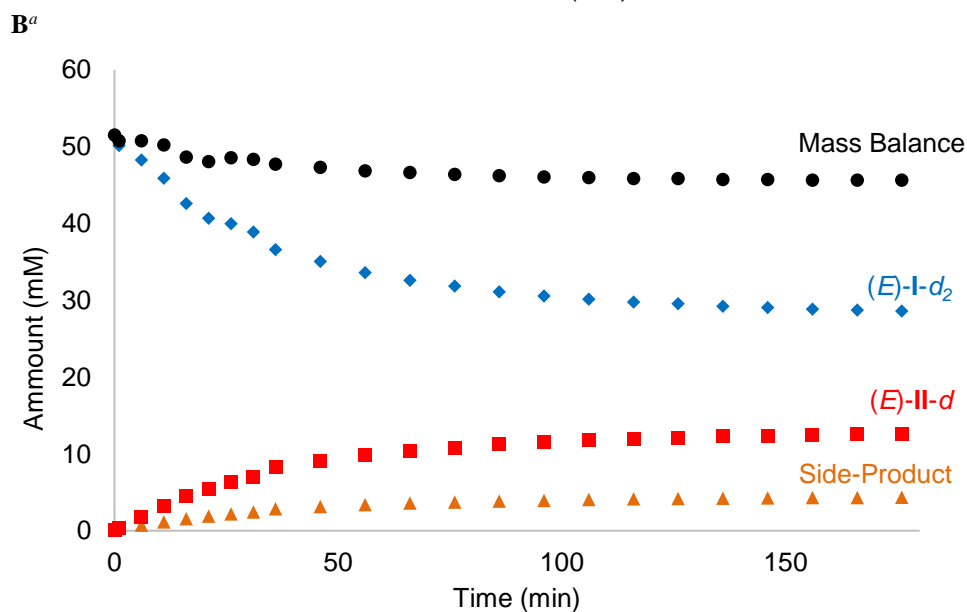

**Figure S15.** (A) Standard reaction run with (*E*)-I. (B) Reaction run with deuterated starting material ((*E*)-IV). <sup>a</sup>Reaction conditions (*E*)-I or (*E*)-IV (50 mM), III-1 (70 mM), Benzoquinone (75 mM), Pd(OAc)<sub>2</sub> (5 mol%), DMSO (2.0 mL), 45 °C, air. Reactions observed by LCMS with 1,3,5-trimethoxybenzene as internal standard.

By running the standard oxidative Heck reaction with and without deuterium across the alkene, we were able to better probe the rate-determining step (Figure S15) and calculate a Kinetic Isotope Effect, KIE, equal to 2 for the initial regime of the reaction. Formation of a side-product, where  $\beta$ -hydride elimination occurs to create the olefin out of conjugation in both cases, was observed in to occur at similar rates. This is consistent with our proposed cycle as a hydride is being eliminated in both cases so no effect from the deuteride should be observed. For this reason, we also suggest that the secondary KIE during migratory insertion is negligible. We do observe a small decrease in mass balance for the reaction with the deuterated starting material, (*E*)-**IV**, suggesting that another untraced side-product was being produced. Finally, we observed that in the initial regime of the reaction, that the decay of either starting material, (*E*)-**I** and (*E*)-**IV**, occur at similar rates. This initial regime represents 4 turn-overs of Pd. We suggest that this is due to the resting state being **Pd-C** since the rate-determining step is  $\beta$ -hydride/deuteride elimination (Scheme S9). With this in mind, we rationalized that the free Pd<sup>II</sup> catalyst in solution should react in both cases at the same rate with PhB(OH)<sub>2</sub> and the corresponding starting material, leading to a similar initial decay in starting material for both reactions. This rate of decay of starting material will, of course, decrease in the case of (*E*)-**IV** over time as the Pd-catalyst is being sequestered longer in the resting state than in the reaction with the standard starting material, (*E*)-**I**, reflected in the KIE. We do, indeed, see that after 4 turn-overs of Pd the difference in rate for starting material decay becomes obvious.

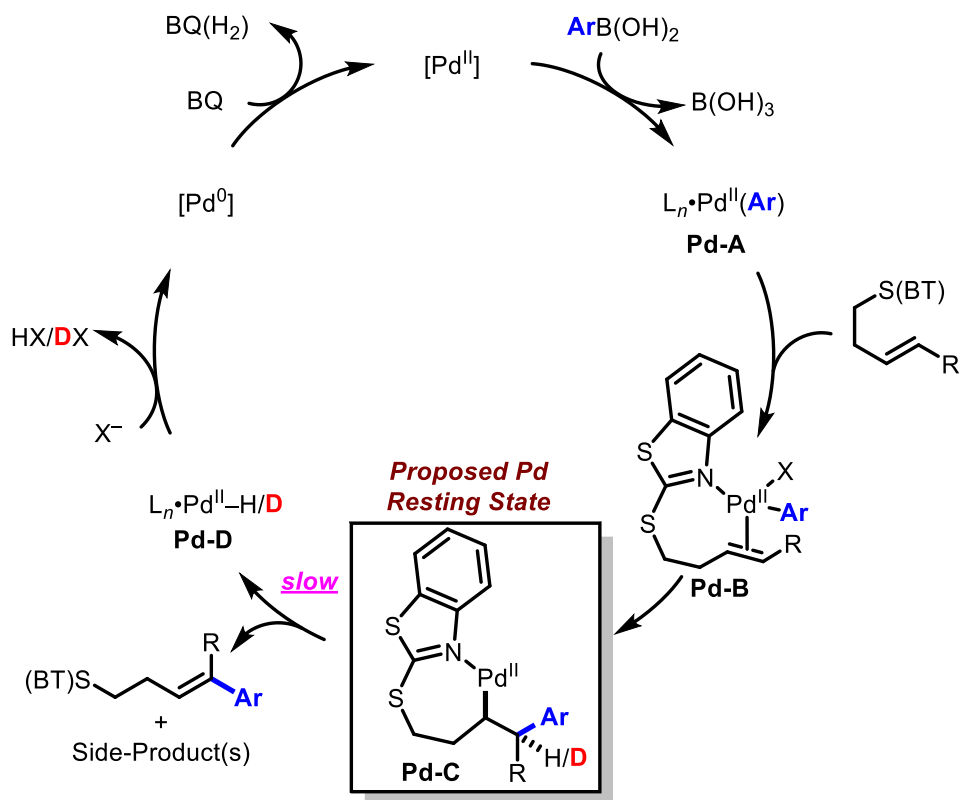

**Scheme S10.** Catalytic Cycle for (BT)S-directed Oxidative Heck Reaction



## Kinetic Analysis of C–H Olefination

### Same-Excess Setup

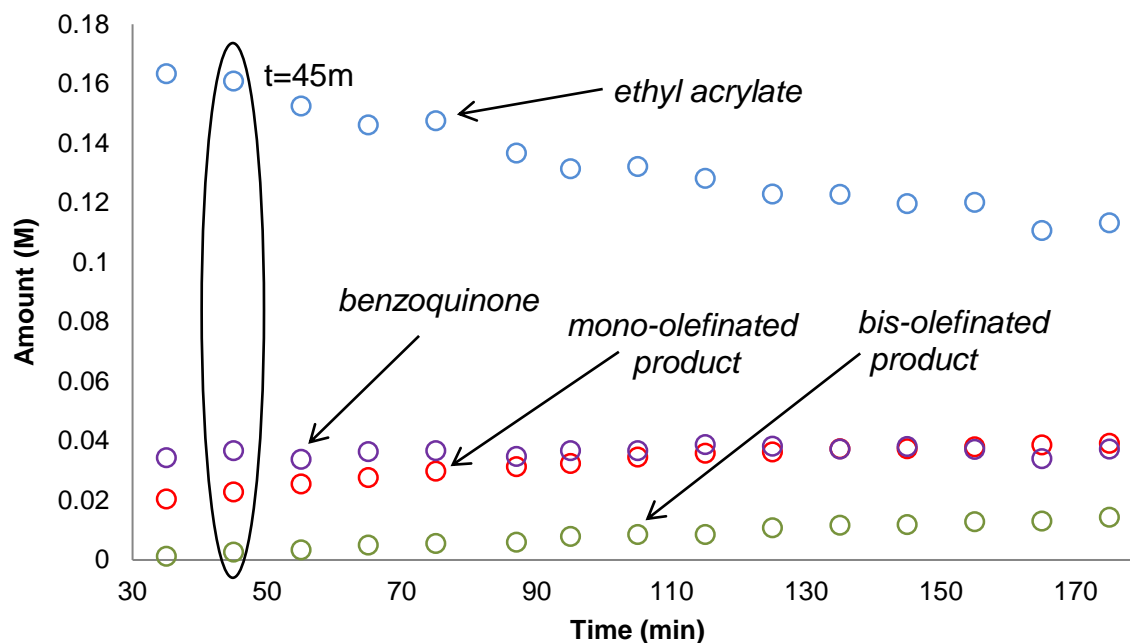

**Figure S16.** Reaction from *different-excess* 2 in **Figure 7A** plotted from 35 min to 175 min showing the concentrations of ethyl acrylate (blue), benzoquinone (purple), mono-olefinated product (red), and bis-olefinated product (green) present as measured by  $^1\text{H-NMR}$ . The values at  $t=45\text{m}$  for each are used in **Figure 7B**.

## COMPUTATIONAL DETAILS

All calculations were performed with Gaussian 09.<sup>21</sup> The B3LYP density functional and LANL2DZ basis set were used in geometry optimizations. Single-point energies were calculated with M06 and a mixed basis set of SDD for Pd and 6-311+G(d,p) for other atoms. Solvation energy corrections were calculated using the SMD model.<sup>22</sup> In accordance with the experimental conditions, DMSO ( $\epsilon = 46.826$ ) was used as solvent in the single point calculations. To confirm the nature of the stationary points, vibrational frequency calculations were performed for all optimized structures. All optimized transition state structures have only one imaginary (negative) frequency, and all minima (reactants, products, and intermediates) have no imaginary frequencies. The imaginary frequencies of all transition states are provided in the “Cartesian Coordinates and Energies of the Optimized Structures” section below. The reported Gibbs free energies and enthalpies include zero-point vibrational energies and thermal corrections at 298 K.

### Probing the energy profile for the terminal alkene

The energy profile for the migratory insertion and  $\beta$ -hydride elimination was also calculated for the terminal alkene, **1** (Figure S17). Similar to the internal alkene, the migratory insertion step (**TS1**) has a lower activation free energy barrier of 12.4 kcal/mol with respect to the  $\pi$ -alkene complex **INT1'** while the subsequent  $\beta$ -hydride elimination step has a higher activation energy barrier indicating that the  $\beta$ -hydride elimination is the rate-determining step. As in the case of the for the internal alkene, the coordination of the (BT)S group is weakened at both the migratory insertion and  $\beta$ -hydride elimination steps. The transition state leading to the *E*-isomer (**TS2\_E**) has an activation energy of 13.8 kcal/mol, lower than 17.8 kcal/mol for the *Z*-isomer (**TS2\_Z**). This indicates that the formation of the *E*-isomer is kinetically favored at the rate-determining step, consistent with experimental selectivity.

The optimized structures of **TS2\_Z** and **TS2\_E** are shown in figure **S18**. In the less stable transition state **TS2\_Z**, the steric repulsions between of the phenyl group and the acetate group as well as with the methylene group *cis* to it is evidenced by the short O $\cdots$ H distance of 2.46 Å, C $\cdots$ C distance of 3.36 Å and C $\cdots$ H distances of and 2.58 Å and 2.64 Å respectively. In **TS2\_E**, such steric repulsions are absent as the phenyl group is oriented away from the acetate group and is *trans* to the corresponding methylene group.

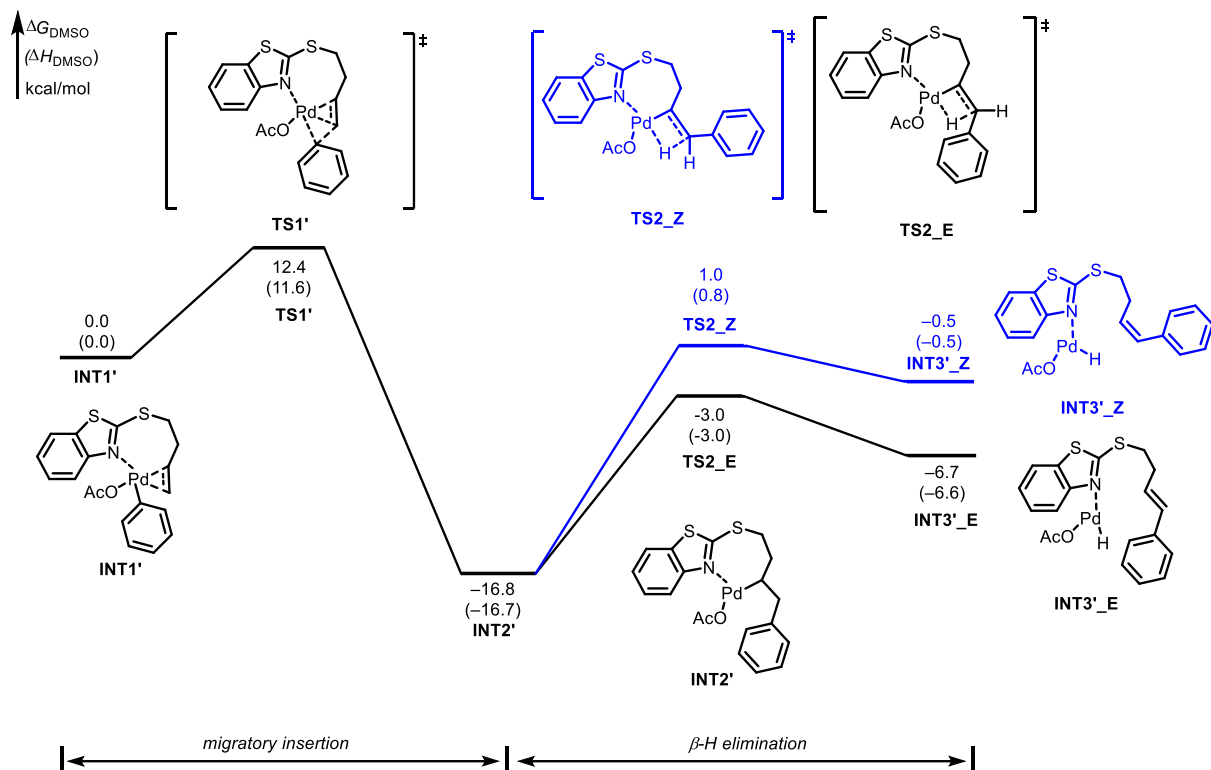

**Figure S17.** Computed energy profile for migratory insertion and  $\beta$ -hydride elimination steps for the terminal alkene **1**.

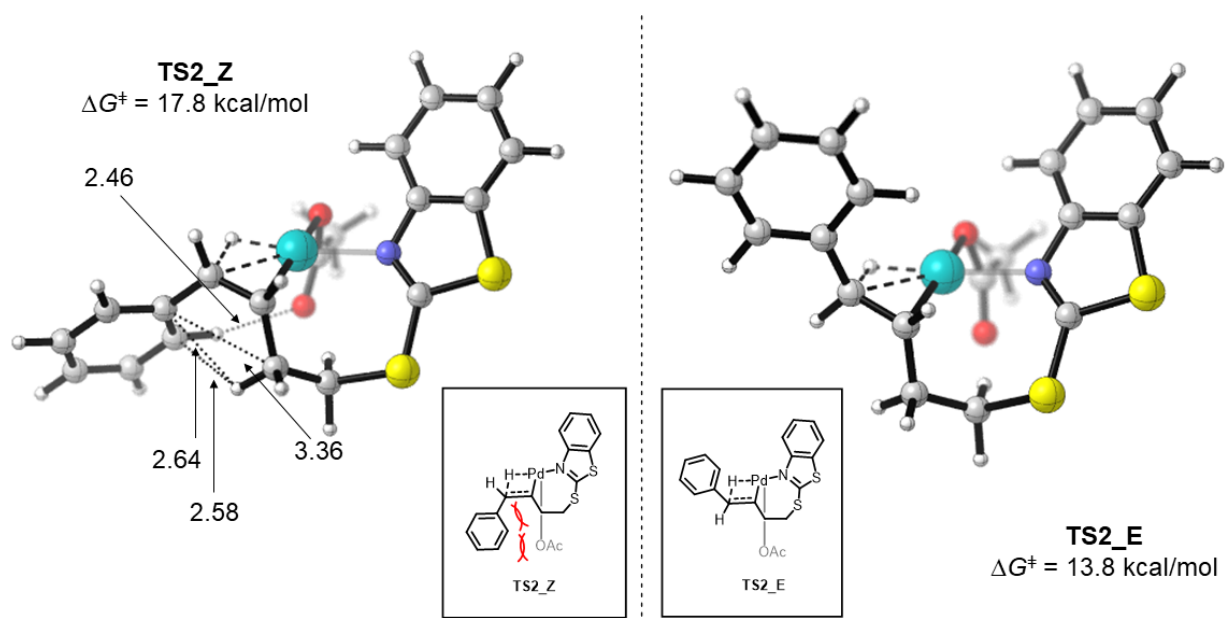

**Figure S18.** Computed transition states of the  $\beta$ -hydride elimination step leading to the *Z* and *E* isomers.

## Probing transition states for alternative coordination modes

Even though the N-coordinated intermediates were lower in energy for the system, there was a concern whether the thermodynamic energy difference between the N- and S-coordinated intermediates were small enough for the S-coordinated high energy intermediates to be still kinetically favored. Therefore, the transition states for the S-coordination modes were calculated for the migratory insertion step using the terminal alkene. The S-coordinated transition states (**TS1'\_S5** for the 5-membered metallacycle and **TS1'\_S7** for the 7-membered metallacycle) were energetically higher than that for the N-coordinated transition state (Figure S19). Therefore, S-coordinated modes are not favored energetically for this directing group. However, the difference in energy for the transition states between the N- and S- coordination modes are minimal indicating that the S-coordination modes could be viable and operating under the reaction conditions in similar directing groups especially in the absence of potential N-coordination modes.

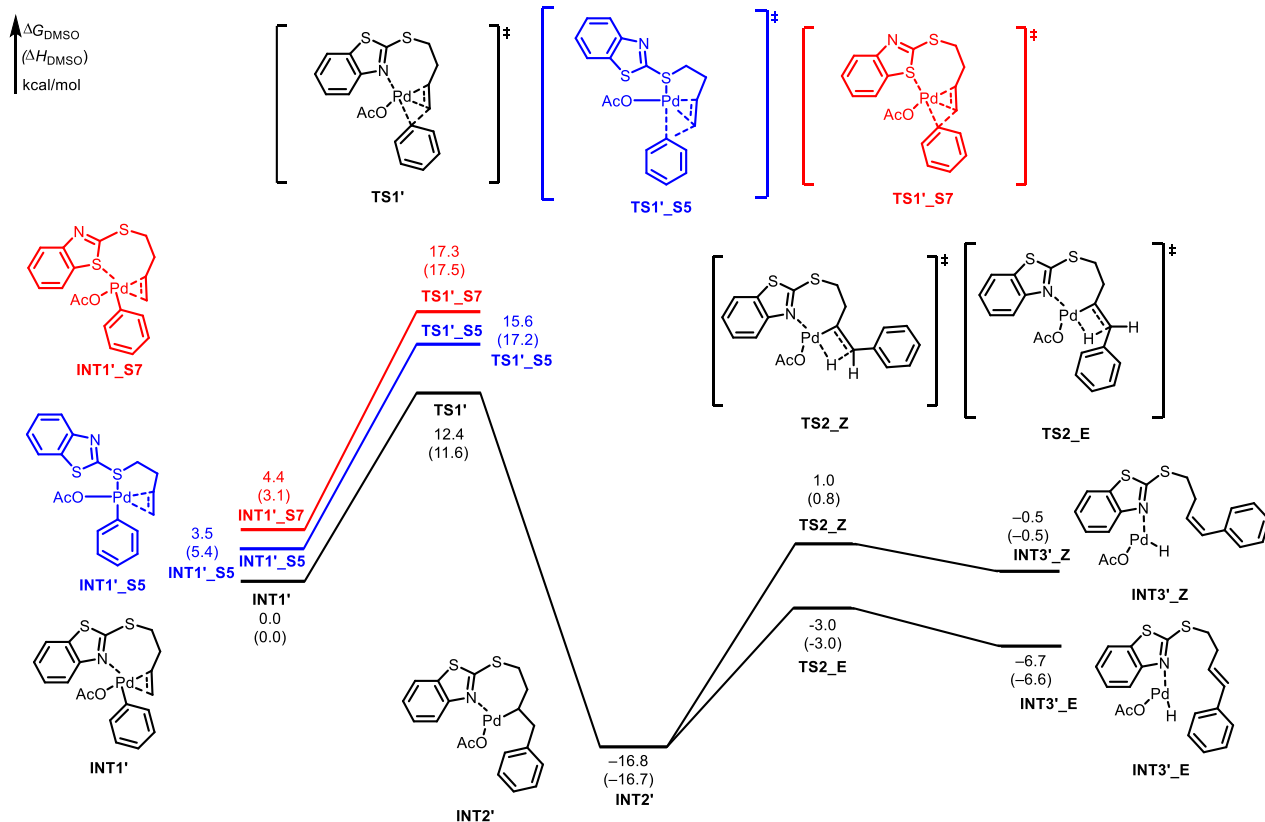

**Figure S19.** Comparison of the transition states (N-coordinated vs S-coordinated) for the terminal alkene.

## Cartesian Coordinates and Energies of the Optimized Structures

### INT1\_N

B3LYP SCF energy: -1087.47077077 a.u.

B3LYP enthalpy: -1087.106164 a.u.

B3LYP free energy: -1087.190662 a.u.

M06 SCF energy in solution: -1864.539847 a.u.

M06 enthalpy in solution: -1864.175240 a.u.

M06 free energy in solution: -1864.259738 a.u.

#### Cartesian coordinates

| ATOM | X           | Y           | Z           |
|------|-------------|-------------|-------------|
| C    | 0.74136000  | 3.29923200  | -0.49307200 |
| H    | 1.22332200  | 4.18593800  | -0.94150000 |
| C    | 1.33581000  | 2.10263300  | -1.21493600 |
| H    | 2.41941900  | 2.05575000  | -1.12376000 |
| C    | 0.74934200  | 1.29662900  | -2.18888800 |
| H    | -0.28694300 | 1.41116900  | -2.49400000 |
| H    | 1.07117900  | 3.28386500  | 0.55382800  |
| H    | 1.37819400  | 0.70144600  | -2.84506200 |
| O    | 0.52450400  | -1.42976400 | 1.10614800  |
| C    | 0.72165600  | -1.07278000 | 2.37868200  |
| O    | 0.99903700  | 0.10664400  | 2.74208400  |
| C    | 0.60470800  | -2.22405300 | 3.37021100  |
| H    | -0.25545200 | -2.85533600 | 3.12376000  |
| H    | 1.50582400  | -2.84750500 | 3.30349500  |
| H    | 0.51411800  | -1.83377600 | 4.38735900  |
| C    | -0.77772500 | 3.52105000  | -0.55544800 |
| H    | -1.00888100 | 4.58851800  | -0.48313900 |
| H    | -1.23759300 | 3.13814500  | -1.46984800 |
| S    | -1.76548000 | 2.80740800  | 0.92223000  |
| C    | -2.26893800 | 1.18627100  | 0.31486400  |
| C    | -2.22966900 | -0.92359500 | -0.54615100 |
| C    | -3.61856000 | -0.86637800 | -0.25665000 |
| C    | -1.67380200 | -2.09214600 | -1.10281900 |
| C    | -4.47011400 | -1.95040600 | -0.51748700 |
| C    | -2.52146500 | -3.17327300 | -1.37452400 |
| H    | -0.60534300 | -2.15066400 | -1.27763600 |
| C    | -3.90704800 | -3.10505400 | -1.08762900 |
| H    | -5.53083400 | -1.90472800 | -0.28981400 |
| H    | -2.10639000 | -4.08412200 | -1.79679000 |
| H    | -4.54396900 | -3.95886200 | -1.30327000 |
| S    | -4.03965500 | 0.74606400  | 0.45958200  |
| N    | -1.50901900 | 0.24766000  | -0.19955400 |
| Pd   | 0.73043300  | 0.10356200  | -0.28618000 |
| C    | 2.69240700  | -0.33504700 | -0.35208700 |

|   |            |             |             |
|---|------------|-------------|-------------|
| C | 3.20760500 | -1.07846400 | -1.43499600 |
| C | 3.54898100 | 0.06082500  | 0.69724700  |
| C | 4.57715600 | -1.42030200 | -1.47102300 |
| H | 2.55755700 | -1.41304600 | -2.24203500 |
| C | 4.91723200 | -0.27905800 | 0.65139100  |
| H | 3.14635500 | 0.59931400  | 1.55080600  |
| C | 5.43596500 | -1.01730000 | -0.43115600 |
| H | 4.96471900 | -2.00126100 | -2.30613200 |
| H | 5.57130600 | 0.02520800  | 1.46651800  |
| H | 6.49105300 | -1.28080600 | -0.45964000 |

## INT1\_S

B3LYP SCF energy: -1087.45200476 a.u.

B3LYP enthalpy: -1087.087888 a.u.

B3LYP free energy: -1087.174323 a.u.

M06 SCF energy in solution: -1864.522482 a.u.

M06 enthalpy in solution: -1864.158365 a.u.

M06 free energy in solution: -1864.244800 a.u.

### Cartesian coordinates

| ATOM | X           | Y           | Z           |
|------|-------------|-------------|-------------|
| C    | -0.31244100 | 3.23789000  | -0.06360200 |
| H    | 0.21596900  | 4.20004700  | -0.14224000 |
| C    | 0.47962900  | 2.25475100  | -0.92518900 |
| H    | 1.53424200  | 2.50777000  | -1.02487600 |
| C    | -0.02893800 | 1.29407300  | -1.79897900 |
| H    | -1.09690700 | 1.11877500  | -1.90612300 |
| H    | -0.23524900 | 2.96217100  | 0.99704400  |
| H    | 0.60214900  | 0.87940800  | -2.57886400 |
| O    | 1.12814000  | -1.37784500 | 1.34500600  |
| C    | 1.69090600  | -0.94383900 | 2.48188800  |
| O    | 1.89528600  | 0.28076400  | 2.72405000  |
| C    | 2.08118800  | -2.04754600 | 3.45368500  |
| H    | 1.26325300  | -2.76778400 | 3.56484200  |
| H    | 2.94799000  | -2.58918000 | 3.05398600  |
| H    | 2.34057300  | -1.61740500 | 4.42421300  |
| C    | -1.78859800 | 3.48910800  | -0.45171300 |
| H    | -2.03048100 | 4.55179600  | -0.34359600 |
| H    | -2.01024700 | 3.19450400  | -1.47996700 |
| S    | -3.13692200 | 2.70330100  | 0.66403800  |
| C    | -2.95937100 | 0.94574200  | 0.25327500  |
| C    | -2.23616900 | -1.48744000 | 0.17408500  |
| C    | -3.28661100 | -1.08427000 | -0.69871500 |
| C    | -1.73719400 | -2.79559600 | 0.17918700  |
| C    | -3.87311900 | -2.02321900 | -1.56902300 |
| C    | -2.33236600 | -3.72189100 | -0.69787500 |
| H    | -0.90165200 | -3.06745500 | 0.81603200  |

|    |             |             |             |
|----|-------------|-------------|-------------|
| C  | -3.39268400 | -3.34159500 | -1.55671000 |
| H  | -4.67730800 | -1.71121300 | -2.22801300 |
| H  | -1.96554000 | -4.74467500 | -0.71845800 |
| H  | -3.83441700 | -4.08055000 | -2.21990100 |
| Pd | 0.70360200  | 0.18375800  | 0.01527200  |
| C  | 2.55363500  | 0.01681300  | -0.74015500 |
| C  | 2.77789100  | -0.73386000 | -1.91014300 |
| C  | 3.62359900  | 0.62411800  | -0.05494100 |
| C  | 4.09246400  | -0.86330700 | -2.40859400 |
| H  | 1.95834300  | -1.23151300 | -2.42359700 |
| C  | 4.93207800  | 0.49211000  | -0.56711200 |
| H  | 3.44774800  | 1.15740100  | 0.87513800  |
| C  | 5.16896800  | -0.24641500 | -1.74316100 |
| H  | 4.26822000  | -1.44806700 | -3.30939100 |
| H  | 5.76119000  | 0.95750100  | -0.03787100 |
| H  | 6.18020100  | -0.34767000 | -2.13046900 |
| N  | -3.64694700 | 0.28164600  | -0.62538400 |
| S  | -1.70743900 | -0.07613500 | 1.19831100  |



## INT1\_S'

B3LYP SCF energy: -1087.46127389 a.u.

B3LYP enthalpy: -1087.096654 a.u.

B3LYP free energy: -1087.183156 a.u.

M06 SCF energy in solution: -1864.528713 a.u.

M06 enthalpy in solution: -1864.164093 a.u.

M06 free energy in solution: -1864.250595 a.u.

### Cartesian coordinates

| ATOM | X           | Y           | Z           |
|------|-------------|-------------|-------------|
| C    | -0.89120600 | -3.04936100 | 1.75269900  |
| H    | -0.79644100 | -4.13029400 | 1.95104400  |
| C    | -1.44106200 | -2.85735900 | 0.34721400  |
| H    | -2.52137000 | -2.95569100 | 0.24294400  |
| C    | -0.69126300 | -2.63484300 | -0.77824400 |
| H    | 0.39576200  | -2.58383000 | -0.76807900 |
| H    | -1.62859300 | -2.67793200 | 2.47649100  |
| H    | -1.16766600 | -2.59990900 | -1.75367700 |
| S    | 0.38458000  | -0.51284000 | 1.75074400  |
| C    | 0.48177800  | -2.42050500 | 2.01827300  |
| H    | 0.80503000  | -2.55455900 | 3.05307900  |
| H    | 1.26164400  | -2.76480600 | 1.33645500  |
| C    | 1.94130900  | -0.23186300 | 0.82613900  |
| C    | 3.95018200  | 0.75097300  | -0.29102000 |
| C    | 3.82274600  | -0.66687100 | -0.33142900 |
| C    | 5.03500800  | 1.40508400  | -0.89260000 |
| C    | 4.79957000  | -1.44516100 | -0.98140600 |
| C    | 6.00459100  | 0.61575600  | -1.53776000 |
| H    | 5.13220000  | 2.48608900  | -0.86614800 |
| C    | 5.88754800  | -0.79506500 | -1.58156800 |
| H    | 4.69360100  | -2.52514400 | -1.00810600 |
| H    | 6.85573900  | 1.09898300  | -2.01003300 |
| H    | 6.65076700  | -1.37933800 | -2.08830800 |
| S    | 2.55021300  | 1.48421500  | 0.61197500  |
| N    | 2.67315100  | -1.17401400 | 0.31046400  |
| O    | -2.78309700 | -0.25231800 | -1.48982500 |
| C    | -3.94476600 | -0.90693100 | -1.36956600 |
| O    | -4.22756400 | -1.70674300 | -0.43357400 |
| C    | -4.93142800 | -0.58160800 | -2.48631300 |
| H    | -5.34576800 | 0.42014700  | -2.31503100 |
| H    | -4.42312300 | -0.56963200 | -3.45610000 |
| H    | -5.74526700 | -1.31128000 | -2.48855700 |
| Pd   | -1.37180600 | -0.39440300 | -0.00261600 |
| C    | -1.59140200 | 1.59664100  | 0.23912700  |
| C    | -1.68098400 | 2.40212500  | -0.91526900 |
| C    | -1.64339400 | 2.19448400  | 1.51724200  |
| C    | -1.79034900 | 3.80190200  | -0.79022300 |

|   |             |            |             |
|---|-------------|------------|-------------|
| H | -1.69910600 | 1.93829000 | -1.89716800 |
| C | -1.77160400 | 3.59616000 | 1.63504200  |
| H | -1.59905400 | 1.59216500 | 2.42143700  |
| C | -1.83603500 | 4.40300900 | 0.48386100  |
| H | -1.85351000 | 4.41731000 | -1.68584300 |
| H | -1.82052800 | 4.04832900 | 2.62401700  |
| H | -1.93015200 | 5.48283000 | 0.57717300  |

## INT2\_N

B3LYP SCF energy: -1087.49574227 a.u.

B3LYP enthalpy: -1087.129181 a.u.

B3LYP free energy: -1087.213320 a.u.

M06 SCF energy in solution: -1864.558736 a.u.

M06 enthalpy in solution: -1864.192174 a.u.

M06 free energy in solution: -1864.276314 a.u.

## Cartesian coordinates

| ATOM | X           | Y           | Z           |
|------|-------------|-------------|-------------|
| C    | -1.67338400 | 0.10822800  | 1.59167000  |
| H    | -2.66308000 | -0.37724400 | 1.69583300  |
| C    | -1.37080800 | 0.16982900  | 0.08804800  |
| H    | -2.17572700 | 0.73097800  | -0.39762200 |
| H    | -1.80464600 | 1.13424300  | 1.95111900  |
| O    | -1.05017000 | 2.97020700  | -0.90879100 |
| C    | -2.01996700 | 3.55689200  | -0.19076500 |
| O    | -2.42502300 | 3.15081800  | 0.93201300  |
| C    | -2.60579700 | 4.78936900  | -0.87202200 |
| H    | -1.82950800 | 5.55828700  | -0.97014300 |
| H    | -2.94378900 | 4.53352700  | -1.88287700 |
| H    | -3.43924600 | 5.18167200  | -0.28397400 |
| C    | -0.73607100 | -0.68984600 | 2.50289900  |
| H    | -1.17699400 | -0.79754300 | 3.50011500  |
| H    | -0.49744500 | -1.68676000 | 2.12327800  |
| S    | 0.95951600  | 0.12675600  | 2.94257900  |
| C    | 1.93129100  | -0.25572100 | 1.47574100  |
| C    | 2.64156400  | -0.28597900 | -0.70236000 |
| C    | 3.68362900  | -1.07528600 | -0.15122700 |
| C    | 2.62487800  | 0.00580400  | -2.08051100 |
| C    | 4.72075600  | -1.57905700 | -0.95091600 |
| C    | 3.65502900  | -0.50073200 | -2.88345800 |
| H    | 1.82344700  | 0.61321300  | -2.49129200 |
| C    | 4.69450100  | -1.28553800 | -2.32526500 |
| H    | 5.52012500  | -2.17984600 | -0.52780900 |
| H    | 3.65849500  | -0.28625700 | -3.94838400 |
| H    | 5.48390800  | -1.66657000 | -2.96742600 |

|    |             |             |             |
|----|-------------|-------------|-------------|
| Pd | 0.17328400  | 1.49607800  | -0.26005000 |
| C  | -1.13318900 | -1.16762600 | -0.65149100 |
| H  | -0.85980800 | -0.93909100 | -1.68994800 |
| H  | -0.29014300 | -1.71614100 | -0.21499300 |
| C  | -2.37916900 | -2.05538700 | -0.64398500 |
| C  | -3.52904600 | -1.68159900 | -1.37740100 |
| C  | -2.41472100 | -3.25890600 | 0.09323500  |
| C  | -4.68212800 | -2.48635600 | -1.37115200 |
| H  | -3.51861700 | -0.76131500 | -1.95895500 |
| C  | -3.56734900 | -4.06865300 | 0.10274500  |
| H  | -1.53499300 | -3.57229700 | 0.65362900  |
| C  | -4.70672600 | -3.68383800 | -0.62844200 |
| H  | -5.55627800 | -2.18358100 | -1.94312000 |
| H  | -3.57452300 | -4.99430700 | 0.67409300  |
| H  | -5.59780100 | -4.30712100 | -0.62324400 |
| N  | 1.69129200  | 0.16794900  | 0.24642000  |
| S  | 3.42600300  | -1.28806000 | 1.63250000  |

## INT2\_S

B3LYP SCF energy: -1087.46447376 a.u.

B3LYP enthalpy: -1087.098474 a.u.

B3LYP free energy: -1087.183936 a.u.

M06 SCF energy in solution: -1864.53638 a.u.

M06 enthalpy in solution: -1864.17038 a.u.

M06 free energy in solution: -1864.255843 a.u.

## Cartesian coordinates

| ATOM | X           | Y           | Z           |
|------|-------------|-------------|-------------|
| C    | -1.52357600 | -0.44820200 | 1.61368500  |
| H    | -2.24176200 | -1.28835700 | 1.68432100  |
| C    | -1.21678400 | -0.30780000 | 0.11323900  |
| H    | -2.16795500 | -0.33345500 | -0.42538000 |
| H    | -2.09460700 | 0.43102300  | 1.93121200  |
| O    | -2.58790500 | 1.94921000  | -1.20871200 |
| C    | -3.72300100 | 1.96449600  | -0.48842900 |
| O    | -3.80339400 | 1.62223400  | 0.72124000  |
| C    | -4.93052100 | 2.43807100  | -1.29001900 |
| H    | -4.76886400 | 3.46951300  | -1.62558300 |
| H    | -5.05168400 | 1.81710200  | -2.18523100 |
| H    | -5.83098900 | 2.38718200  | -0.67287800 |
| C    | -0.41612200 | -0.79646800 | 2.61598300  |
| H    | -0.86224300 | -1.06886100 | 3.57853900  |
| H    | 0.23034700  | -1.61540200 | 2.29333900  |
| S    | 0.76908400  | 0.63620500  | 3.12952800  |
| C    | 1.86549100  | 0.60370500  | 1.70044400  |
| C    | 2.89678800  | 1.06389300  | -0.60091000 |
| C    | 3.40720400  | -0.03098000 | 0.15328600  |

|    |             |             |             |
|----|-------------|-------------|-------------|
| C  | 3.41448600  | 1.39269300  | -1.85881800 |
| C  | 4.45149800  | -0.81638600 | -0.36785300 |
| C  | 4.45449900  | 0.59389100  | -2.37277100 |
| H  | 3.02626300  | 2.23011300  | -2.43035700 |
| C  | 4.96815900  | -0.49750700 | -1.63359900 |
| H  | 4.83669500  | -1.64639200 | 0.21583200  |
| H  | 4.86660800  | 0.82203700  | -3.35199900 |
| H  | 5.77331000  | -1.09500700 | -2.05201100 |
| Pd | -0.74045900 | 1.65338800  | -0.40498400 |
| N  | 2.79514200  | -0.24668400 | 1.41114900  |
| S  | 1.60440900  | 1.92144100  | 0.36213000  |
| C  | -0.20913200 | -1.27470500 | -0.53857600 |
| H  | -0.05665700 | -0.95992600 | -1.57974800 |
| H  | 0.76496700  | -1.23322300 | -0.04207900 |
| C  | -0.71497800 | -2.72150300 | -0.52048500 |
| C  | -1.87184100 | -3.08895400 | -1.24562500 |
| C  | -0.03452700 | -3.71704000 | 0.21380900  |
| C  | -2.33816800 | -4.41556400 | -1.23214500 |
| H  | -2.40363400 | -2.33895800 | -1.82852000 |
| C  | -0.49826200 | -5.04689900 | 0.22923700  |
| H  | 0.86888600  | -3.45720200 | 0.76347100  |
| C  | -1.65417500 | -5.40041600 | -0.49162400 |
| H  | -3.22818400 | -4.68156100 | -1.79779800 |
| H  | 0.04129000  | -5.80119900 | 0.79754700  |
| H  | -2.01439900 | -6.42634300 | -0.48118400 |

## INT2\_S'

B3LYP SCF energy: -1087.48739901 a.u.

B3LYP enthalpy: -1087.120831 a.u.

B3LYP free energy: -1087.206165 a.u.

M06 SCF energy in solution: -1864.552828 a.u.

M06 enthalpy in solution: -1864.18626 a.u.

M06 free energy in solution: -1864.271594 a.u.

## Cartesian coordinates

| ATOM | X           | Y           | Z           |
|------|-------------|-------------|-------------|
| C    | -0.68911700 | -1.48243300 | 0.22253500  |
| H    | -1.34328100 | -2.30691000 | 0.55344800  |
| H    | 0.05864000  | -1.33255600 | 1.00990600  |
| S    | 0.94472400  | -0.39381900 | -1.79759000 |
| C    | 0.01872300  | -1.91344700 | -1.06258600 |
| H    | 0.78236700  | -2.67573100 | -0.89974400 |
| H    | -0.66014800 | -2.21281000 | -1.86469400 |
| C    | 2.49910500  | -0.47567400 | -0.83021300 |
| C    | 4.76299700  | -0.06076700 | 0.15908300  |
| C    | 4.10196100  | -1.26328900 | 0.54061100  |

|    |             |             |             |
|----|-------------|-------------|-------------|
| C  | 6.02955700  | 0.26983200  | 0.66070400  |
| C  | 4.72033700  | -2.15203600 | 1.43997900  |
| C  | 6.63630200  | -0.62757800 | 1.55917900  |
| H  | 6.53362500  | 1.18725200  | 0.37286400  |
| C  | 5.98799700  | -1.82591500 | 1.94428500  |
| H  | 4.20870200  | -3.06549500 | 1.72618300  |
| H  | 7.61761200  | -0.39357200 | 1.96316500  |
| H  | 6.47959100  | -2.49979200 | 2.64056200  |
| S  | 3.72787800  | 0.88424200  | -1.00436700 |
| N  | 2.83101700  | -1.45314200 | -0.04450400 |
| O  | -1.27690300 | 2.92105800  | 0.20820800  |
| C  | -2.35849300 | 3.07543600  | 0.97717900  |
| O  | -3.11827700 | 2.13927000  | 1.34706100  |
| C  | -2.60207700 | 4.52722700  | 1.37830800  |
| H  | -1.73574400 | 4.90851500  | 1.93170800  |
| H  | -2.71784700 | 5.14555700  | 0.48034500  |
| H  | -3.49988200 | 4.59757700  | 1.99732400  |
| Pd | -0.36382100 | 1.32971700  | -0.63816200 |
| C  | -1.54838500 | -0.21285900 | 0.06736900  |
| H  | -1.84561300 | 0.19980200  | 1.03487500  |
| C  | -2.78467200 | -0.32403800 | -0.85168000 |
| H  | -3.20021600 | 0.68114700  | -0.97652100 |
| H  | -2.51306100 | -0.69973700 | -1.84720800 |
| C  | -3.84492700 | -1.23028000 | -0.22168500 |
| C  | -4.12056000 | -2.51116300 | -0.74693100 |
| C  | -4.55898100 | -0.78730300 | 0.91767300  |
| C  | -5.09092900 | -3.34094200 | -0.15064300 |
| H  | -3.58956200 | -2.85687500 | -1.63340800 |
| C  | -5.52712900 | -1.61640600 | 1.51213000  |
| H  | -4.35150200 | 0.20288900  | 1.31703500  |
| C  | -5.79595400 | -2.89566900 | 0.98341400  |
| H  | -5.29829100 | -4.32286800 | -0.57091400 |
| H  | -6.07429000 | -1.26423100 | 2.38389400  |
| H  | -6.54715800 | -3.53272900 | 1.44507400  |

## INT1

B3LYP SCF energy: -1126.78852395 a.u.

B3LYP enthalpy: -1126.393877 a.u.

B3LYP free energy: -1126.480367 a.u.

M06 SCF energy in solution: -1903.838928 a.u.

M06 enthalpy in solution: -1903.444281 a.u.

M06 free energy in solution: -1903.530772 a.u.

### Cartesian coordinates

| ATOM | X           | Y           | Z           |
|------|-------------|-------------|-------------|
| C    | -0.93211200 | 3.00894000  | -0.47397200 |
| H    | -2.00598800 | 2.95014600  | -0.24967900 |
| C    | -0.54049800 | 1.93453500  | -1.47447400 |
| H    | 0.50348600  | 1.95776400  | -1.78742400 |
| C    | -1.41081100 | 1.15906300  | -2.22656900 |
| H    | -2.48024100 | 1.26800100  | -2.06157800 |
| H    | -0.74974100 | 3.99360100  | -0.93245100 |
| O    | -0.50221700 | -1.45267000 | 1.19542100  |
| C    | -0.55222800 | -0.95142600 | 2.42999200  |
| O    | -0.64738800 | 0.28837600  | 2.68272500  |
| C    | -0.50658400 | -1.99776500 | 3.53399500  |
| H    | -1.49588400 | -2.46525400 | 3.62317200  |
| H    | 0.21310200  | -2.78442200 | 3.28584500  |
| H    | -0.24800500 | -1.52724800 | 4.48618900  |
| C    | -0.16495600 | 2.91557200  | 0.86067600  |
| H    | -0.35098800 | 3.79389100  | 1.48867100  |
| H    | -0.38859900 | 2.01065800  | 1.43727000  |
| S    | 1.73384800  | 2.98559600  | 0.64844900  |
| C    | 2.24392900  | 1.30199900  | 0.25799600  |
| C    | 2.34277200  | -0.89618300 | -0.35476800 |
| C    | 3.73509300  | -0.68961200 | -0.18239100 |
| C    | 1.86548600  | -2.16213800 | -0.74563200 |
| C    | 4.66786300  | -1.71175500 | -0.40809500 |
| C    | 2.79300300  | -3.18833100 | -0.97407500 |
| H    | 0.79852700  | -2.33319700 | -0.82738500 |
| C    | 4.18153100  | -2.96825700 | -0.81137200 |
| H    | 5.73271900  | -1.54556600 | -0.27536600 |
| H    | 2.43720700  | -4.17141300 | -1.27002200 |
| H    | 4.88176700  | -3.77958000 | -0.99178200 |
| S    | 4.05662400  | 1.01401700  | 0.35624800  |
| Pd   | -0.67740400 | -0.00580500 | -0.29268000 |
| C    | -2.65349500 | -0.41182800 | -0.20711900 |
| C    | -3.47498100 | 0.29762400  | 0.69396200  |
| C    | -3.20546300 | -1.45753600 | -0.97595200 |
| C    | -4.84376600 | -0.02742100 | 0.80877400  |
| H    | -3.05182000 | 1.06938200  | 1.33201000  |

|   |             |             |             |
|---|-------------|-------------|-------------|
| C | -4.57362700 | -1.78026500 | -0.85661800 |
| H | -2.58024500 | -2.03359200 | -1.65601800 |
| C | -5.39843400 | -1.06233100 | 0.03153100  |
| H | -5.46765600 | 0.52028500  | 1.51287200  |
| H | -4.98915500 | -2.59169800 | -1.45161000 |
| H | -6.45305000 | -1.31250500 | 0.12344500  |
| N | 1.54153600  | 0.25385100  | -0.11307600 |
| C | -1.01068600 | 0.38776600  | -3.46633400 |
| H | -1.50731900 | -0.58883100 | -3.50269900 |
| H | -1.32425600 | 0.94240800  | -4.36415100 |
| H | 0.07307100  | 0.23390000  | -3.52215200 |

## TS1

B3LYP SCF energy: -1126.76259526 a.u.

B3LYP enthalpy: -1126.369584 a.u.

B3LYP free energy: -1126.454439 a.u.

M06 SCF energy in solution: -1903.816166 a.u.

M06 enthalpy in solution: -1903.423155 a.u.

M06 free energy in solution: -1903.50801 a.u.

Imaginary frequency: -332.9875 cm<sup>-1</sup>

### Cartesian coordinates

| ATOM | X           | Y           | Z           |
|------|-------------|-------------|-------------|
| C    | -0.75210900 | 3.11502700  | 0.03504400  |
| H    | -1.77510900 | 3.16843900  | 0.43787000  |
| C    | -0.69644100 | 2.05495900  | -1.07072400 |
| H    | 0.17544300  | 2.10447300  | -1.72825300 |
| C    | -1.92963500 | 1.60062300  | -1.67699700 |
| H    | -2.83146600 | 2.12754700  | -1.36611800 |
| H    | -0.53169100 | 4.10465200  | -0.39605000 |
| O    | -0.70135300 | -1.59855100 | 1.05266700  |
| C    | -0.72355800 | -1.22984900 | 2.32592500  |
| O    | -0.64647400 | -0.01346000 | 2.70584400  |
| C    | -0.86316000 | -2.36526700 | 3.33256400  |
| H    | -1.84110600 | -2.84677700 | 3.20613700  |
| H    | -0.09571800 | -3.12609200 | 3.14754800  |
| H    | -0.77253900 | -1.98134900 | 4.35193900  |
| C    | 0.17988600  | 2.86299000  | 1.23451100  |
| H    | 0.11719900  | 3.68012500  | 1.96190800  |
| H    | -0.01981600 | 1.91376300  | 1.74569100  |
| S    | 2.02436700  | 2.89810700  | 0.75643800  |
| C    | 2.39340000  | 1.21329900  | 0.25236100  |
| C    | 2.28827800  | -0.98644500 | -0.35997300 |
| C    | 3.69681600  | -0.83717500 | -0.42879500 |
| C    | 1.70266200  | -2.23515900 | -0.64823700 |
| C    | 4.53804100  | -1.89367600 | -0.80491500 |

|    |             |             |             |
|----|-------------|-------------|-------------|
| C  | 2.54003300  | -3.29571600 | -1.02472100 |
| H  | 0.63531600  | -2.36828100 | -0.51601600 |
| C  | 3.94251300  | -3.13052500 | -1.10986400 |
| H  | 5.61542000  | -1.76749800 | -0.85658400 |
| H  | 2.10072500  | -4.26566900 | -1.24192100 |
| H  | 4.56982300  | -3.96850400 | -1.40253500 |
| S  | 4.17910400  | 0.84854000  | 0.04000900  |
| Pd | -0.58154700 | 0.17283400  | -0.16768100 |
| C  | -2.64267500 | -0.02151900 | -0.60076000 |
| C  | -3.50970200 | 0.34741700  | 0.45827600  |
| C  | -2.97716900 | -1.13626800 | -1.40437400 |
| C  | -4.66639100 | -0.40446400 | 0.72564600  |
| H  | -3.26852100 | 1.19805400  | 1.09145300  |
| C  | -4.13654100 | -1.88665500 | -1.13623900 |
| H  | -2.32480000 | -1.43462200 | -2.22202200 |
| C  | -4.98562400 | -1.52221100 | -0.07306200 |
| H  | -5.31193900 | -0.12393400 | 1.55501700  |
| H  | -4.37222500 | -2.75330400 | -1.75014800 |
| H  | -5.88333200 | -2.10103800 | 0.13212400  |
| N  | 1.58885500  | 0.20262500  | 0.00586500  |
| C  | -1.93585800 | 1.19710000  | -3.14475400 |
| H  | -2.85397100 | 0.66986400  | -3.41931600 |
| H  | -1.87366900 | 2.10861400  | -3.75788000 |
| H  | -1.07835400 | 0.56360800  | -3.39731000 |

## INT2

B3LYP SCF energy: -1126.81681727 a.u.

B3LYP enthalpy: -1126.420744 a.u.

B3LYP free energy: -1126.506305 a.u.

M06 SCF energy in solution: -1903.860285 a.u.

M06 enthalpy in solution: -1903.46421 a.u.

M06 free energy in solution: -1903.549773 a.u.

### Cartesian coordinates

| ATOM | X           | Y          | Z           |
|------|-------------|------------|-------------|
| C    | 0.30216800  | 3.35224400 | 0.60640300  |
| H    | 0.46949000  | 2.77287100 | 1.51849400  |
| H    | 0.36695000  | 4.42203600 | 0.83389700  |
| C    | -1.07421600 | 1.53726300 | -0.59029500 |
| C    | -2.47724700 | 1.05238800 | -1.03272100 |
| H    | -3.10698500 | 0.99353600 | -0.13624500 |
| H    | -0.35281000 | 1.39589600 | -1.40695300 |
| C    | 2.23260500  | 1.34182500 | -0.31779900 |
| S    | 1.83274200  | 3.08627800 | -0.50628900 |
| C    | -1.02318300 | 2.98290600 | -0.07414500 |
| H    | -1.20512000 | 3.68487700 | -0.90383100 |



|    |             |             |             |
|----|-------------|-------------|-------------|
| H  | -1.82355600 | 3.14329800  | 0.66459700  |
| C  | 2.22896700  | -0.88999700 | 0.20847600  |
| C  | 3.51284800  | -0.83687800 | -0.38569900 |
| C  | 1.75002700  | -2.09852300 | 0.75032400  |
| C  | 4.32820700  | -1.97250200 | -0.48535600 |
| C  | 2.56432500  | -3.23647000 | 0.65846200  |
| H  | 0.78658300  | -2.13107100 | 1.24903200  |
| C  | 3.83683400  | -3.18009600 | 0.04244100  |
| H  | 5.30987700  | -1.92650400 | -0.94724900 |
| H  | 2.21071700  | -4.17556100 | 1.07463600  |
| H  | 4.44797100  | -4.07674500 | -0.01737900 |
| N  | 1.52959100  | 0.35385800  | 0.20248700  |
| S  | 3.88652800  | 0.85478500  | -0.93256000 |
| Pd | -0.42283300 | 0.32353100  | 0.93761600  |
| O  | -0.63251600 | -1.09488800 | 2.87257700  |
| C  | -1.86281100 | -0.70044600 | 2.88779500  |
| O  | -2.27832400 | 0.13199200  | 1.94819000  |
| C  | -2.83072300 | -1.13838200 | 3.96069000  |
| H  | -3.86271500 | -1.01602200 | 3.62118100  |
| H  | -2.63796100 | -2.17969100 | 4.23675600  |
| H  | -2.68175400 | -0.52003300 | 4.85579700  |
| C  | -2.41492700 | -0.34361700 | -1.66066500 |
| C  | -1.74307100 | -0.56804900 | -2.88471500 |
| C  | -3.04689100 | -1.43989000 | -1.03499900 |
| C  | -1.70409000 | -1.84830400 | -3.46556400 |
| H  | -1.24994200 | 0.25905000  | -3.39306700 |
| C  | -3.01388100 | -2.72309100 | -1.61381600 |
| H  | -3.55376900 | -1.28424300 | -0.08556000 |
| C  | -2.34175600 | -2.93363600 | -2.83262000 |
| H  | -1.18122500 | -1.99951800 | -4.40775300 |
| H  | -3.50810100 | -3.55383500 | -1.11427000 |
| H  | -2.31433900 | -3.92392900 | -3.28182300 |
| C  | -3.15522400 | 2.05757700  | -2.01407200 |
| H  | -2.53580400 | 2.23863900  | -2.90268200 |
| H  | -4.11780500 | 1.65510200  | -2.35322600 |
| H  | -3.34589000 | 3.02261500  | -1.52938500 |

## TS2

B3LYP SCF energy: -1126.77559828 a.u.

B3LYP enthalpy: -1126.384987 a.u.

B3LYP free energy: -1126.470581 a.u.

M06 SCF energy in solution: -1903.82977 a.u.

M06 enthalpy in solution: -1903.439159 a.u.

M06 free energy in solution: -1903.524753 a.u.

Imaginary frequency: -604.4603 cm<sup>-1</sup>

### Cartesian coordinates

| ATOM | X           | Y           | Z           |
|------|-------------|-------------|-------------|
| C    | -0.14959300 | -2.57776900 | -1.86421700 |
| H    | -0.58188500 | -2.66379100 | -0.86117600 |
| H    | -0.28137900 | -3.52958600 | -2.39024000 |
| C    | 1.63427300  | -0.82616600 | -1.17031900 |
| C    | 2.67891800  | -0.66296800 | -0.18016700 |
| H    | 1.83300900  | -0.83655600 | 1.24022200  |
| H    | 1.41880300  | 0.04916000  | -1.78415600 |
| C    | -1.83178800 | -0.19081900 | -1.69659600 |
| S    | -1.23543700 | -1.39467000 | -2.88964900 |
| C    | 1.33566700  | -2.16887500 | -1.83964200 |
| H    | 1.72149000  | -2.13910000 | -2.87089600 |
| H    | 1.86336900  | -2.98285900 | -1.32935200 |
| C    | -2.17566400 | 1.09347900  | 0.16026100  |
| C    | -3.16694400 | 1.68355800  | -0.66607900 |
| C    | -1.99861600 | 1.55745200  | 1.47930300  |
| C    | -3.96979200 | 2.74321200  | -0.22155400 |
| C    | -2.80026900 | 2.61781700  | 1.92841600  |
| H    | -1.29219000 | 1.05712200  | 2.13265500  |
| C    | -3.77256700 | 3.21149100  | 1.08978400  |
| H    | -4.72367100 | 3.18930900  | -0.86339600 |
| H    | -2.67618900 | 2.98048600  | 2.94531200  |
| H    | -4.38159100 | 4.03096400  | 1.46243900  |
| N    | -1.42862600 | 0.05284400  | -0.46971100 |
| S    | -3.21156000 | 0.86547700  | -2.28565300 |
| Pd   | 0.40470600  | -0.64569200 | 0.56037300  |
| O    | -0.62252400 | -0.95515000 | 2.40395600  |
| C    | -1.17141500 | -2.16536000 | 2.37250000  |
| O    | -1.06164800 | -2.95477400 | 1.37886200  |
| C    | -1.95691100 | -2.55185800 | 3.61881600  |
| H    | -2.33994500 | -3.57078600 | 3.52243100  |
| H    | -1.31292600 | -2.47543000 | 4.50287000  |
| H    | -2.79247000 | -1.85494500 | 3.75938500  |
| C    | 3.29699700  | 0.71559600  | -0.04499800 |
| C    | 4.70022000  | 0.87365700  | -0.12781700 |
| C    | 2.50122900  | 1.87547600  | 0.10587800  |
| C    | 5.28607100  | 2.15257600  | -0.08330500 |

|   |            |             |             |
|---|------------|-------------|-------------|
| H | 5.34516800 | 0.00740800  | -0.23936200 |
| C | 3.08385000 | 3.15198400  | 0.14949200  |
| H | 1.42463700 | 1.76675700  | 0.22100300  |
| C | 4.48177500 | 3.29826500  | 0.05250900  |
| H | 6.36689600 | 2.25043400  | -0.15305600 |
| H | 2.45102500 | 4.02721600  | 0.27410000  |
| H | 4.93492100 | 4.28566300  | 0.09389900  |
| C | 3.58783300 | -1.84513900 | 0.19363800  |
| H | 4.31017100 | -2.03268200 | -0.61347800 |
| H | 4.14464700 | -1.63251500 | 1.11152700  |
| H | 3.01770400 | -2.76150400 | 0.35697800  |

### INT3

B3LYP SCF energy: -1126.78663553 a.u.

B3LYP enthalpy: -1126.393435 a.u.

B3LYP free energy: -1126.478771 a.u.

M06 SCF energy in solution: -1903.838962 a.u.

M06 enthalpy in solution: -1903.445761 a.u.

M06 free energy in solution: -1903.531098 a.u.

#### Cartesian coordinates

| ATOM | X           | Y           | Z           |
|------|-------------|-------------|-------------|
| C    | 0.42709400  | -2.76528500 | 1.70547800  |
| H    | 0.88381800  | -2.76332400 | 0.70891100  |
| H    | 0.70304000  | -3.69128600 | 2.22196500  |
| C    | -1.53567500 | -1.21878100 | 1.15944100  |
| C    | -2.59889700 | -0.92440400 | 0.28915100  |
| H    | -1.27835100 | -1.78894100 | -1.68267500 |
| H    | -1.16989800 | -0.40087500 | 1.77653300  |
| C    | 1.64718200  | -0.07294500 | 1.62562800  |
| S    | 1.33940600  | -1.44737000 | 2.74965700  |
| C    | -1.10432100 | -2.58098200 | 1.67816800  |
| H    | -1.50768500 | -2.71014200 | 2.69580900  |
| H    | -1.50885300 | -3.39523200 | 1.06560900  |
| C    | 1.59857700  | 1.43284700  | -0.09050700 |
| C    | 2.59026400  | 2.07741700  | 0.69260900  |
| C    | 1.19385200  | 1.99783800  | -1.31545500 |
| C    | 3.18196400  | 3.28282100  | 0.28899700  |
| C    | 1.78208400  | 3.20311800  | -1.72425800 |
| H    | 0.46420800  | 1.48446200  | -1.93079800 |
| C    | 2.76513600  | 3.84286600  | -0.93198600 |
| H    | 3.94062700  | 3.77123000  | 0.89321700  |
| H    | 1.48288300  | 3.64700900  | -2.66969000 |
| H    | 3.20965800  | 4.77478200  | -1.27137800 |
| N    | 1.08436000  | 0.23488500  | 0.47753900  |
| S    | 2.93024600  | 1.11406400  | 2.19333900  |

|    |             |             |             |
|----|-------------|-------------|-------------|
| Pd | -0.41585300 | -0.93169900 | -0.74210100 |
| O  | 0.97672700  | -0.97810700 | -2.27902900 |
| C  | 1.88323200  | -1.94961200 | -2.15743400 |
| O  | 1.91941700  | -2.76622500 | -1.18919500 |
| C  | 2.89022400  | -2.00147100 | -3.29939300 |
| H  | 3.65950700  | -2.74790600 | -3.08701300 |
| H  | 2.37296900  | -2.25987200 | -4.23154700 |
| H  | 3.34847100  | -1.01585400 | -3.43939300 |
| C  | -3.12253800 | 0.48452100  | 0.17716600  |
| C  | -4.43524200 | 0.72259600  | -0.29800600 |
| C  | -2.35011100 | 1.61244800  | 0.56178100  |
| C  | -4.96088100 | 2.02557400  | -0.37232100 |
| H  | -5.06427600 | -0.10500100 | -0.60725000 |
| C  | -2.87195600 | 2.91138100  | 0.48800900  |
| H  | -1.32611900 | 1.48325300  | 0.89684600  |
| C  | -4.18464800 | 3.12850400  | 0.02185600  |
| H  | -5.97422700 | 2.17461800  | -0.73767900 |
| H  | -2.25268800 | 3.75497100  | 0.78297900  |
| H  | -4.58766800 | 4.13644700  | -0.03796700 |
| C  | -3.48864400 | -2.02802800 | -0.27510400 |
| H  | -4.39059900 | -2.12478100 | 0.34841700  |
| H  | -3.80711300 | -1.81033100 | -1.29852200 |
| H  | -2.98278100 | -2.99424100 | -0.28757200 |

## INT1'

B3LYP SCF energy: -1087.47632148 a.u.

B3LYP enthalpy: -1087.111470 a.u.

B3LYP free energy: -1087.194417 a.u.

M06 SCF energy in solution: -1864.541159 a.u.

M06 enthalpy in solution: -1864.176308 a.u.

M06 free energy in solution: -1864.259254 a.u.

## Cartesian coordinates

| ATOM | X           | Y           | Z           |
|------|-------------|-------------|-------------|
| C    | -0.93535200 | 3.02622000  | -0.73481000 |
| H    | -2.01505900 | 2.99003200  | -0.53725200 |
| C    | -0.53127600 | 1.90958800  | -1.67902400 |
| H    | 0.52137300  | 1.90563000  | -1.95824700 |
| C    | -1.38423800 | 1.08112200  | -2.38949100 |
| H    | -2.46176600 | 1.17259100  | -2.31566100 |
| H    | -0.72337800 | 3.98978300  | -1.22359800 |
| H    | -1.00403000 | 0.45227000  | -3.19133500 |
| O    | -0.55515600 | -1.39541300 | 1.10224800  |
| C    | -0.61639500 | -0.84331300 | 2.31411300  |

|    |             |             |             |
|----|-------------|-------------|-------------|
| O  | -0.70768500 | 0.40681000  | 2.51268600  |
| C  | -0.58850600 | -1.84197200 | 3.46147700  |
| H  | -1.57829900 | -2.30797700 | 3.55245200  |
| H  | 0.13667000  | -2.63666500 | 3.25907700  |
| H  | -0.34732600 | -1.33153600 | 4.39747900  |
| C  | -0.20091400 | 2.96362100  | 0.62080200  |
| H  | -0.39520400 | 3.86005300  | 1.21962800  |
| H  | -0.44627300 | 2.07647300  | 1.21603100  |
| S  | 1.70299000  | 3.00945900  | 0.45396200  |
| C  | 2.20930800  | 1.30802800  | 0.13713900  |
| C  | 2.31080100  | -0.90698100 | -0.41119900 |
| C  | 3.69688500  | -0.70787400 | -0.18792100 |
| C  | 1.83746500  | -2.17814900 | -0.78944600 |
| C  | 4.62780400  | -1.74419000 | -0.34678200 |
| C  | 2.76306200  | -3.21844800 | -0.95155000 |
| H  | 0.77349800  | -2.34136000 | -0.91561000 |
| C  | 4.14570200  | -3.00672300 | -0.73580700 |
| H  | 5.68787500  | -1.58414000 | -0.17426000 |
| H  | 2.41010700  | -4.20560400 | -1.23699100 |
| H  | 4.84443400  | -3.82908500 | -0.86455800 |
| S  | 4.01302800  | 1.00715200  | 0.31621700  |
| Pd | -0.70804900 | -0.01082000 | -0.44734800 |
| C  | -2.68608400 | -0.41475000 | -0.36969000 |
| C  | -3.50977400 | 0.30658000  | 0.51876300  |
| C  | -3.23429000 | -1.46409100 | -1.13613300 |
| C  | -4.87984300 | -0.01617600 | 0.62887900  |
| H  | -3.08990000 | 1.08517000  | 1.15061500  |
| C  | -4.60311100 | -1.78436900 | -1.01947000 |
| H  | -2.60761200 | -2.03855300 | -1.81566300 |
| C  | -5.43110200 | -1.05831700 | -0.14070400 |
| H  | -5.50696200 | 0.53995000  | 1.32337400  |
| H  | -5.01721400 | -2.59828300 | -1.61191800 |
| H  | -6.48653300 | -1.30618400 | -0.05225600 |
| N  | 1.51163300  | 0.25562100  | -0.23150400 |

## TS1'

B3LYP SCF energy: -1087.45379570 a.u.

B3LYP enthalpy: -1087.090396 a.u.

B3LYP free energy: -1087.171992 a.u.

M06 SCF energy in solution: -1864.521301 a.u.

M06 enthalpy in solution: -1864.157901 a.u.

M06 free energy in solution: -1864.239498 a.u.

Imaginary frequency: -331.4135 cm<sup>-1</sup>

### Cartesian coordinates

| ATOM | X           | Y           | Z           |
|------|-------------|-------------|-------------|
| C    | -0.64955900 | 3.19258900  | -0.50069600 |
| H    | -1.68370500 | 3.38082700  | -0.17413300 |
| C    | -0.63220400 | 1.98804400  | -1.44529800 |
| H    | 0.24576700  | 1.88867200  | -2.08651700 |
| C    | -1.87515700 | 1.46463200  | -1.94727900 |
| H    | -2.78324100 | 2.04096000  | -1.78690500 |
| H    | -0.32134500 | 4.09037100  | -1.04695200 |
| H    | -1.85625300 | 0.92614700  | -2.89201400 |
| O    | -0.82731500 | -1.38624400 | 1.11249600  |
| C    | -0.92337300 | -0.85369400 | 2.32303700  |
| O    | -0.86595300 | 0.40281900  | 2.54144100  |
| C    | -1.12738400 | -1.84774400 | 3.45895900  |
| H    | -2.11754400 | -2.31135400 | 3.36288600  |
| H    | -0.38168900 | -2.64844500 | 3.39519100  |
| H    | -1.05452600 | -1.34064700 | 4.42450100  |
| C    | 0.19276900  | 3.03971700  | 0.77971900  |
| H    | 0.13359300  | 3.94206400  | 1.39865600  |
| H    | -0.09346100 | 2.17261000  | 1.38650500  |
| S    | 2.06193000  | 2.92738600  | 0.42921400  |
| C    | 2.37019400  | 1.18587500  | 0.11230800  |
| C    | 2.19176400  | -1.05870000 | -0.28562900 |
| C    | 3.60692800  | -0.97340700 | -0.30815500 |
| C    | 1.56381700  | -2.30521500 | -0.47819300 |
| C    | 4.41503800  | -2.09429000 | -0.54456100 |
| C    | 2.36755800  | -3.42984200 | -0.71606300 |
| H    | 0.48768900  | -2.38410700 | -0.38208000 |
| C    | 3.77813400  | -3.32999200 | -0.75576100 |
| H    | 5.49809300  | -2.01695800 | -0.56190800 |
| H    | 1.89459400  | -4.39764400 | -0.85940500 |
| H    | 4.37881100  | -4.21677900 | -0.94039300 |
| S    | 4.14449600  | 0.73007200  | 0.01358600  |
| Pd   | -0.62708500 | 0.20956600  | -0.31380400 |
| C    | -2.67465500 | -0.02118900 | -0.78259200 |
| C    | -3.57403200 | 0.40800900  | 0.22431400  |
| C    | -3.01331400 | -1.13638100 | -1.58410800 |
| C    | -4.77067600 | -0.29488500 | 0.44790400  |

|   |             |             |             |
|---|-------------|-------------|-------------|
| H | -3.32583100 | 1.25982800  | 0.85244100  |
| C | -4.21409400 | -1.83487800 | -1.35847500 |
| H | -2.33933200 | -1.46632700 | -2.37242000 |
| C | -5.09668900 | -1.41572400 | -0.34389200 |
| H | -5.44350700 | 0.02784700  | 1.23944800  |
| H | -4.45847000 | -2.69956700 | -1.97172800 |
| H | -6.02629300 | -1.95349700 | -0.17213800 |
| N | 1.53221600  | 0.18807100  | -0.06679500 |

## INT2'

B3LYP SCF energy: -1087.51247577 a.u.

B3LYP enthalpy: -1087.146059 a.u.

B3LYP free energy: 1087.229194 a.u.

M06 SCF energy in solution: -1864.569309 a.u.

M06 enthalpy in solution: -1864.202892 a.u.

M06 free energy in solution: -1864.286027 a.u.

## Cartesian coordinates

| ATOM | X           | Y           | Z           |
|------|-------------|-------------|-------------|
| C    | -0.52660500 | -3.39433700 | -0.33956600 |
| H    | -0.68470700 | -3.07355700 | 0.69353900  |
| H    | -0.68766300 | -4.47508600 | -0.41644800 |
| C    | 1.03837400  | -1.45048600 | -0.97475000 |
| C    | 2.49691700  | -1.05339200 | -1.28555600 |
| H    | 3.11989600  | -1.25378100 | -0.40637300 |
| H    | 0.36430800  | -1.03094000 | -1.73364100 |
| C    | -2.24968000 | -1.04575400 | -0.69529600 |
| S    | -1.97830100 | -2.69426700 | -1.36463300 |
| C    | 0.85129700  | -2.97035000 | -0.86324600 |
| H    | 1.02683200  | -3.43328700 | -1.84991500 |
| H    | 1.60434700  | -3.38644800 | -0.17675200 |
| C    | -2.10070700 | 0.93925200  | 0.44305600  |
| C    | -3.36274100 | 1.15907800  | -0.15971700 |
| C    | -1.55792200 | 1.90190200  | 1.31648700  |
| C    | -4.08980800 | 2.33770400  | 0.05601700  |
| C    | -2.28471100 | 3.08007900  | 1.54110400  |
| H    | -0.61561000 | 1.71539000  | 1.82200700  |
| C    | -3.53324600 | 3.30304300  | 0.91405500  |
| H    | -5.05408300 | 2.50257500  | -0.41524800 |
| H    | -1.88112100 | 3.83055300  | 2.21494900  |
| H    | -4.07536000 | 4.22579000  | 1.10283900  |
| N    | -1.49242200 | -0.30369300 | 0.09114000  |
| S    | -3.84045600 | -0.27413600 | -1.16747100 |
| Pd   | 0.44971500  | -0.61097100 | 0.80307300  |
| O    | 0.76492800  | 0.25627900  | 3.04438500  |
| C    | 1.96057900  | -0.21525700 | 2.92843700  |

|   |            |             |             |
|---|------------|-------------|-------------|
| O | 2.30825500 | -0.80575500 | 1.79581000  |
| C | 2.96969800 | -0.14112800 | 4.04897200  |
| H | 3.97842100 | -0.00976800 | 3.64553200  |
| H | 2.71819400 | 0.67686200  | 4.72932300  |
| H | 2.95261500 | -1.08213100 | 4.61472000  |
| C | 2.65936700 | 0.39167700  | -1.73260300 |
| C | 2.36282800 | 0.77028500  | -3.06172900 |
| C | 3.09914100 | 1.38685400  | -0.83226200 |
| C | 2.49638600 | 2.10706400  | -3.48117300 |
| H | 2.03403200 | 0.01380600  | -3.77365600 |
| C | 3.23656300 | 2.72500000  | -1.24755400 |
| H | 3.33129600 | 1.10480100  | 0.19186600  |
| C | 2.93445500 | 3.09132300  | -2.57349100 |
| H | 2.26681400 | 2.37881300  | -4.50945600 |
| H | 3.57922700 | 3.47763600  | -0.54049100 |
| H | 3.04209800 | 4.12462500  | -2.89591900 |
| H | 2.85404700 | -1.72043500 | -2.09119800 |

## TS2\_Z

B3LYP SCF energy: -1087.46960920 a.u.

B3LYP enthalpy: -1087.108470 a.u.

B3LYP free energy: -1087.191062 a.u.

M06 SCF energy in solution: -1864.536177 a.u.

M06 enthalpy in solution: -1864.175037 a.u.

M06 free energy in solution: -1864.25763 a.u.

Imaginary frequency: -430.7933 cm<sup>-1</sup>

## Cartesian coordinates

| ATOM | X           | Y           | Z           |
|------|-------------|-------------|-------------|
| C    | 0.74799800  | -2.09053900 | 1.41997000  |
| H    | 0.66488700  | -1.04298200 | 1.72746700  |
| H    | 1.17555300  | -2.66649800 | 2.24847100  |
| C    | 1.23913900  | -1.37797000 | -1.04195400 |
| C    | 2.14437600  | -0.37044600 | -1.51899200 |
| H    | 1.57789600  | 1.15026200  | -0.93442000 |
| H    | 0.54627900  | -1.78923200 | -1.77773600 |
| C    | -2.02411000 | -1.58476700 | 0.53521700  |
| S    | -1.00029900 | -2.84057100 | 1.31125200  |
| C    | 1.58453000  | -2.28468500 | 0.14086500  |
| H    | 1.50687700  | -3.33254400 | -0.18125600 |
| H    | 2.63054900  | -2.11805500 | 0.42835900  |
| C    | -2.82591000 | 0.29079200  | -0.49470200 |
| C    | -4.06102800 | -0.39163700 | -0.35559100 |
| C    | -2.79492300 | 1.56637400  | -1.09188900 |
| C    | -5.26683800 | 0.15422700  | -0.81723800 |
| C    | -3.99815400 | 2.11680200  | -1.55701900 |
| H    | -1.86346900 | 2.11732100  | -1.13637000 |



|    |             |             |             |
|----|-------------|-------------|-------------|
| C  | -5.22277200 | 1.42037200  | -1.42759000 |
| H  | -6.20731100 | -0.37745800 | -0.70771400 |
| H  | -3.98798800 | 3.10255200  | -2.01405600 |
| H  | -6.14202300 | 1.86938100  | -1.79445100 |
| N  | -1.69905400 | -0.42725900 | 0.00560200  |
| S  | -3.81443800 | -1.98518500 | 0.47879000  |
| Pd | 0.26875000  | 0.44373800  | -0.41794300 |
| O  | -0.31333400 | 2.26988200  | 0.49746700  |
| C  | 0.23947900  | 2.34603400  | 1.70371300  |
| O  | 0.99259100  | 1.43867800  | 2.18797400  |
| C  | -0.07881300 | 3.61801100  | 2.47817400  |
| H  | 0.25627800  | 3.52294600  | 3.51401100  |
| H  | 0.43209800  | 4.46804400  | 2.00792800  |
| H  | -1.15506400 | 3.81962300  | 2.44365600  |
| C  | 3.53026100  | -0.14549000 | -0.97267900 |
| C  | 4.62505600  | -0.37094000 | -1.83799900 |
| C  | 3.77490700  | 0.25942500  | 0.36010200  |
| C  | 5.94504700  | -0.22275500 | -1.37435800 |
| H  | 4.44646900  | -0.66770100 | -2.87014300 |
| C  | 5.09618900  | 0.40979400  | 0.81867300  |
| H  | 2.94027800  | 0.49656100  | 1.01873100  |
| C  | 6.18444400  | 0.16529300  | -0.04196700 |
| H  | 6.77844700  | -0.40205000 | -2.04947900 |
| H  | 5.27151200  | 0.73146400  | 1.84221400  |
| H  | 7.20389700  | 0.28802400  | 0.31595000  |
| H  | 2.02416700  | -0.09455000 | -2.56762900 |

## TS2\_E

B3LYP SCF energy: 1087.47278607 a.u.

B3LYP enthalpy: 1087.111829 a.u.

B3LYP free energy: -1087.194739 a.u.

M06 SCF energy in solution: -1864.542117 a.u.

M06 enthalpy in solution: -1864.18116 a.u.

M06 free energy in solution: -1864.26407 a.u.

Imaginary frequency: -669.1739 cm<sup>-1</sup>

### Cartesian coordinates

| ATOM | X           | Y           | Z           |
|------|-------------|-------------|-------------|
| C    | -0.33036500 | -2.88668400 | -1.42495400 |
| H    | -0.69742300 | -2.79001500 | -0.39701200 |
| H    | -0.54091800 | -3.89987200 | -1.78427700 |
| C    | 1.55745700  | -1.12783700 | -1.16878700 |
| C    | 2.64298100  | -0.90867400 | -0.24568700 |
| H    | 1.92470500  | -0.94353900 | 1.21184300  |
| H    | 1.36885700  | -0.36043700 | -1.91917800 |
| C    | -1.86389800 | -0.38657300 | -1.55808600 |
| S    | -1.43562200 | -1.82023600 | -2.55583500 |

|    |             |             |             |
|----|-------------|-------------|-------------|
| C  | 1.16880000  | -2.55531200 | -1.55843300 |
| H  | 1.49727600  | -2.74791500 | -2.59146400 |
| H  | 1.70171300  | -3.26940600 | -0.91275700 |
| C  | -1.97336700 | 1.23821300  | 0.04577300  |
| C  | -3.00761700 | 1.72848500  | -0.79226400 |
| C  | -1.65030100 | 1.92306500  | 1.23411800  |
| C  | -3.71359100 | 2.90116900  | -0.48983800 |
| C  | -2.35479200 | 3.09672100  | 1.54125400  |
| H  | -0.90904900 | 1.50698900  | 1.90725000  |
| C  | -3.37212700 | 3.58747400  | 0.68926700  |
| H  | -4.50196700 | 3.27031500  | -1.13901900 |
| H  | -2.11930600 | 3.63091300  | 2.45777500  |
| H  | -3.90399100 | 4.49859200  | 0.95060800  |
| N  | -1.33975700 | 0.05477200  | -0.43583800 |
| S  | -3.24110200 | 0.63003500  | -2.21862200 |
| Pd | 0.47945300  | -0.62377500 | 0.58392500  |
| O  | -0.44520800 | -0.55064600 | 2.50366700  |
| C  | -1.11516400 | -1.68343800 | 2.68957700  |
| O  | -1.15825100 | -2.61822100 | 1.82533100  |
| C  | -1.84684000 | -1.79107400 | 4.02102000  |
| H  | -2.31906800 | -2.77223800 | 4.11380300  |
| H  | -1.14312100 | -1.63297400 | 4.84657900  |
| H  | -2.61138000 | -1.00675600 | 4.08574000  |
| C  | 3.48632400  | 0.32927500  | -0.23982700 |
| C  | 4.86497500  | 0.20684600  | 0.04337100  |
| C  | 2.96240400  | 1.60915700  | -0.53573300 |
| C  | 5.70887800  | 1.33226500  | 0.01152600  |
| H  | 5.28022300  | -0.77003700 | 0.28531400  |
| C  | 3.80381000  | 2.73217700  | -0.57064300 |
| H  | 1.89546600  | 1.72766000  | -0.71002600 |
| C  | 5.18142100  | 2.59888700  | -0.29955100 |
| H  | 6.76791600  | 1.22054000  | 0.23061600  |
| H  | 3.38741100  | 3.71107400  | -0.79523400 |
| H  | 5.82948600  | 3.47156800  | -0.32026700 |
| H  | 3.17796900  | -1.80490000 | 0.07675500  |

## INT3'\_Z

B3LYP SCF energy: -1087.47543758 a.u.

B3LYP enthalpy: -1087.112152 a.u.

B3LYP free energy: -1087.195082 a.u.

M06 SCF energy in solution: -1864.540342 a.u.

M06 enthalpy in solution: -1864.177057 a.u.

M06 free energy in solution: -1864.259987 a.u.

### Cartesian coordinates

| ATOM | X           | Y           | Z           |
|------|-------------|-------------|-------------|
| C    | -0.53317200 | 2.34166700  | 1.43714900  |
| H    | -0.31407500 | 1.38390900  | 1.92351900  |
| H    | -0.77281200 | 3.08474300  | 2.20566500  |
| C    | -1.33512200 | 1.29619200  | -0.75138200 |
| C    | -2.15382800 | 0.29845600  | -1.29497900 |
| H    | -1.71600300 | -1.38692200 | 0.43117700  |
| H    | -0.49349100 | 1.60151200  | -1.37283200 |
| C    | 1.97205600  | 1.61265100  | 0.03126600  |
| S    | 1.11019200  | 3.02579000  | 0.74043900  |
| C    | -1.65082300 | 2.26084100  | 0.37811100  |
| H    | -1.81035000 | 3.25909800  | -0.05858900 |
| H    | -2.57751000 | 1.98588100  | 0.89161800  |
| C    | 2.55546800  | -0.42303900 | -0.82232100 |
| C    | 3.80294800  | 0.22362900  | -1.01650400 |
| C    | 2.39737800  | -1.76915200 | -1.20554200 |
| C    | 4.89495500  | -0.43482300 | -1.59927200 |
| C    | 3.48559700  | -2.43286000 | -1.78997100 |
| H    | 1.46018500  | -2.27803200 | -1.01302600 |
| C    | 4.72252900  | -1.77500100 | -1.98942600 |
| H    | 5.84654200  | 0.06755500  | -1.74533200 |
| H    | 3.37790300  | -3.47310500 | -2.08470700 |
| H    | 5.55257100  | -2.31080100 | -2.44230500 |
| N    | 1.54842700  | 0.39962600  | -0.24488300 |
| S    | 3.72924000  | 1.93146500  | -0.40501400 |
| Pd   | -0.45982100 | -0.57386400 | 0.09933900  |
| O    | 0.50938100  | -1.97769400 | 1.28274500  |
| C    | 0.67561400  | -1.56758800 | 2.54195900  |
| O    | 0.29801700  | -0.43538400 | 2.96951900  |
| C    | 1.37211600  | -2.58282900 | 3.43798900  |
| H    | 1.50517200  | -2.16889800 | 4.44039000  |
| H    | 0.77355000  | -3.50007300 | 3.49014800  |
| H    | 2.34585800  | -2.84935100 | 3.01054800  |
| C    | -3.57997000 | -0.01549400 | -0.97774400 |
| C    | -4.43728700 | -0.25532500 | -2.07881900 |
| C    | -4.13388500 | -0.06310900 | 0.32476800  |
| C    | -5.80921700 | -0.50267600 | -1.89200500 |
| H    | -4.02888800 | -0.24146700 | -3.08776700 |

|   |             |             |             |
|---|-------------|-------------|-------------|
| C | -5.50321700 | -0.31181700 | 0.51264400  |
| H | -3.48660600 | 0.03405000  | 1.19116900  |
| C | -6.35008700 | -0.52626500 | -0.59347500 |
| H | -6.44772200 | -0.68231200 | -2.75356600 |
| H | -5.90604600 | -0.35656300 | 1.52156300  |
| H | -7.40833800 | -0.72510400 | -0.44325400 |
| H | -1.82956700 | -0.09598600 | -2.25945100 |

### INT3'\_E

B3LYP SCF energy: -1087.48434621 a.u.

B3LYP enthalpy: 1087.121000 a.u.

B3LYP free energy: -1087.204141 a.u.

M06 SCF energy in solution: -1864.550149 a.u.

M06 enthalpy in solution: -1864.186803 a.u.

M06 free energy in solution: -1864.269943 a.u.

### Cartesian coordinates

| ATOM | X           | Y           | Z           |
|------|-------------|-------------|-------------|
| C    | -0.88609500 | -2.81557600 | -1.54093900 |
| H    | -1.23760200 | -2.71412100 | -0.50773600 |
| H    | -1.31925300 | -3.72187000 | -1.97821400 |
| C    | 1.28817300  | -1.48786900 | -1.28601100 |
| C    | 2.39760600  | -1.34075400 | -0.44935500 |
| H    | 1.21585600  | -1.94699700 | 1.60390900  |
| H    | 1.01281200  | -0.65293700 | -1.92762800 |
| C    | -1.71614200 | 0.02865700  | -1.52281800 |
| S    | -1.73821900 | -1.44186400 | -2.56539200 |
| C    | 0.65149100  | -2.81238500 | -1.67087800 |
| H    | 0.93334700  | -3.05002900 | -2.70898200 |
| H    | 1.03611200  | -3.61998800 | -1.03255300 |
| C    | -1.26091900 | 1.60870300  | 0.06328400  |
| C    | -2.21477500 | 2.35611300  | -0.67363500 |
| C    | -0.64944800 | 2.17447000  | 1.19851400  |
| C    | -2.56827800 | 3.66352800  | -0.31120800 |
| C    | -0.99811600 | 3.48195000  | 1.56530700  |
| H    | 0.05242300  | 1.58916400  | 1.78123100  |
| C    | -1.94635200 | 4.22241800  | 0.81980900  |
| H    | -3.29967400 | 4.23057700  | -0.87928700 |
| H    | -0.53727000 | 3.92936500  | 2.44158600  |
| H    | -2.20309500 | 5.23323200  | 1.12563400  |
| N    | -1.00176400 | 0.31106900  | -0.45558600 |
| S    | -2.84892600 | 1.37163600  | -2.06163400 |
| Pd   | 0.39911000  | -1.00011900 | 0.69777500  |
| O    | -0.83081000 | -0.77267400 | 2.35292800  |
| C    | -1.87031100 | -1.60900100 | 2.36625700  |
| O    | -2.10806700 | -2.45355600 | 1.45161100  |
| C    | -2.76221700 | -1.47070500 | 3.59303800  |

|   |             |             |             |
|---|-------------|-------------|-------------|
| H | -3.66825700 | -2.06838400 | 3.46658100  |
| H | -2.21691500 | -1.81600100 | 4.48029600  |
| H | -3.02042000 | -0.41815500 | 3.75333400  |
| C | 3.25904800  | -0.13671800 | -0.33014000 |
| C | 4.41433700  | -0.21591700 | 0.48337800  |
| C | 2.99693200  | 1.07828600  | -1.01106800 |
| C | 5.28330800  | 0.87998600  | 0.61700200  |
| H | 4.62564100  | -1.13953000 | 1.01943400  |
| C | 3.86415100  | 2.17366500  | -0.87835800 |
| H | 2.11742400  | 1.17505500  | -1.64195000 |
| C | 5.01202000  | 2.08142700  | -0.06459600 |
| H | 6.16443000  | 0.79794500  | 1.24857100  |
| H | 3.64758300  | 3.09903800  | -1.40673900 |
| H | 5.68122100  | 2.93236700  | 0.03592100  |
| H | 2.80776900  | -2.23892600 | 0.00864200  |

## INT1'\_S5

B3LYP SCF energy: -1087.46170710 a.u.

B3LYP enthalpy: -1087.097245 a.u.

B3LYP free energy: -1087.183117 a.u.

M06 SCF energy in solution: -1864.53222942 a.u.

M06 enthalpy in solution: -1864.167767 a.u.

M06 free energy in solution: -1864.253639 a.u.

### Cartesian coordinates

| ATOM | X           | Y           | Z           |
|------|-------------|-------------|-------------|
| C    | -1.07581200 | 3.09913300  | 1.22857900  |
| H    | -1.27515600 | 3.39666100  | 2.26698700  |
| H    | -0.98990300 | 4.02528300  | 0.64420200  |
| S    | 0.67025700  | 1.92283100  | -0.59894600 |
| C    | 0.28012000  | 2.36578500  | 1.22358900  |
| H    | 1.09379100  | 2.99641500  | 1.58596000  |
| H    | 0.26150000  | 1.41148100  | 1.75563800  |
| C    | 2.19088600  | 0.96045200  | -0.37393500 |
| C    | 4.21023500  | -0.49118300 | -0.66914400 |
| C    | 4.09998900  | 0.22240900  | 0.55908100  |
| C    | 5.30199900  | -1.33107200 | -0.93206400 |
| C    | 5.10019100  | 0.08997200  | 1.54117400  |
| C    | 6.29502200  | -1.45265700 | 0.05754100  |
| H    | 5.38624200  | -1.87674200 | -1.86707300 |
| C    | 6.19374500  | -0.74929100 | 1.28241900  |
| H    | 5.00442100  | 0.63383300  | 2.47563600  |
| H    | 7.15036200  | -2.09863300 | -0.12271500 |
| H    | 6.97326200  | -0.86379700 | 2.03099200  |
| S    | 2.77156200  | -0.14569600 | -1.72795500 |
| N    | 2.95337500  | 1.03410000  | 0.67472300  |

|    |             |             |             |
|----|-------------|-------------|-------------|
| Pd | -1.59583800 | 0.45916500  | -0.44728600 |
| C  | -3.26891800 | -0.56880400 | -0.04225600 |
| C  | -4.25593700 | -0.74348800 | -1.03091600 |
| C  | -3.41635000 | -1.14943300 | 1.23252400  |
| C  | -5.41161000 | -1.49732300 | -0.73222200 |
| H  | -4.13242800 | -0.32116500 | -2.02594600 |
| C  | -4.57831800 | -1.89628900 | 1.52158900  |
| H  | -2.63068800 | -1.05021000 | 1.97717300  |
| C  | -5.57745300 | -2.06926300 | 0.54380300  |
| H  | -6.17234200 | -1.63754100 | -1.49772300 |
| H  | -4.69239900 | -2.34808400 | 2.50501900  |
| H  | -6.46916600 | -2.64934400 | 0.77028800  |
| O  | -0.64648500 | -1.36716800 | -0.73655700 |
| C  | -0.01899600 | -1.78653600 | 0.36439800  |
| C  | 0.60688200  | -3.16671000 | 0.24745600  |
| H  | 1.28988700  | -3.34285700 | 1.08239000  |
| H  | -0.18814700 | -3.92334700 | 0.26445900  |
| H  | 1.13491900  | -3.26260200 | -0.70669900 |
| O  | 0.03959600  | -1.10104000 | 1.43277800  |
| C  | -2.78023300 | 2.38170900  | -0.57468100 |
| H  | -3.77694300 | 2.02111200  | -0.80872900 |
| H  | -2.31262200 | 3.03250500  | -1.31176400 |
| C  | -2.27060500 | 2.28311300  | 0.72141000  |
| H  | -2.88267100 | 1.80513000  | 1.48456800  |

## INT1'\_S7

B3LYP SCF energy: -1087.45391057 a.u.

B3LYP enthalpy: -1087.089645 a.u.

B3LYP free energy: -1087.174631 a.u.

M06 SCF energy in solution: -1864.52327231 a.u.

M06 enthalpy in solution: -1864.159007 a.u.

M06 free energy in solution: -1864.243992 a.u.

## Cartesian coordinates

| ATOM | X           | Y           | Z           |
|------|-------------|-------------|-------------|
| C    | -0.53869700 | 2.78706400  | -0.79142900 |
| H    | -1.63588000 | 2.82104400  | -0.75650900 |
| C    | -0.08044300 | 1.55475800  | -1.55000300 |
| H    | 0.99835500  | 1.40682700  | -1.58194800 |
| C    | -0.84560500 | 0.78779200  | -2.41581200 |
| H    | -1.88880900 | 1.01425200  | -2.60736600 |
| H    | -0.20395000 | 3.67530600  | -1.34932400 |
| H    | -0.37073100 | 0.07924000  | -3.09090100 |
| O    | -1.16196500 | -1.59284600 | 1.20964400  |
| C    | -1.35317700 | -0.94909900 | 2.36615000  |
| O    | -1.25389600 | 0.31080000  | 2.48202300  |

|    |             |             |             |
|----|-------------|-------------|-------------|
| C  | -1.71037500 | -1.84849800 | 3.53732900  |
| H  | -2.74513400 | -2.19548900 | 3.42125000  |
| H  | -1.06489900 | -2.73302600 | 3.54959500  |
| H  | -1.61847400 | -1.29653100 | 4.47607500  |
| C  | -0.00633900 | 2.87657700  | 0.65749200  |
| H  | -0.36725200 | 3.79099700  | 1.13989000  |
| H  | -0.30857300 | 2.02483100  | 1.27530500  |
| S  | 1.88962200  | 3.10093700  | 0.77090900  |
| C  | 2.53605800  | 1.46040600  | 0.37880100  |
| C  | 3.03198200  | -1.01920000 | 0.10160200  |
| C  | 4.00075200  | -0.09603600 | -0.38385300 |
| C  | 3.20743100  | -2.40287000 | -0.02182200 |
| C  | 5.17297200  | -0.57024100 | -1.00096300 |
| C  | 4.38470200  | -2.86444900 | -0.64296400 |
| H  | 2.46470000  | -3.10241300 | 0.34932200  |
| C  | 5.35688900  | -1.95688300 | -1.12528100 |
| H  | 5.90724700  | 0.14053300  | -1.36659500 |
| H  | 4.54640600  | -3.93384100 | -0.74916000 |
| H  | 6.25758100  | -2.33899600 | -1.59826200 |
| Pd | -0.81477800 | -0.28658000 | -0.37036800 |
| C  | -2.80451700 | -0.36564400 | -0.66844100 |
| C  | -3.63224100 | 0.50861000  | 0.05908600  |
| C  | -3.35253600 | -1.33591800 | -1.52740400 |
| C  | -5.03315500 | 0.41714700  | -0.09408400 |
| H  | -3.20700100 | 1.21996000  | 0.76151200  |
| C  | -4.75414700 | -1.42070600 | -1.66775400 |
| H  | -2.71230600 | -2.02474300 | -2.07308900 |
| C  | -5.59572600 | -0.54227500 | -0.95734700 |
| H  | -5.67666500 | 1.08744600  | 0.47222200  |
| H  | -5.18121700 | -2.17292700 | -2.32794900 |
| H  | -6.67533000 | -0.61102900 | -1.06860100 |
| S  | 1.65319400  | -0.12649100 | 0.89465400  |
| N  | 3.67151100  | 1.26760800  | -0.22010200 |

### TS1'\_S5

B3LYP SCF energy: -1087.43339427 a.u.

B3LYP enthalpy: -1087.070447 a.u.

B3LYP free energy: -1087.155813 a.u.

M06 SCF energy in solution: -1864.51192366 a.u.

M06 enthalpy in solution: -1864.148976 a.u.

M06 free energy in solution: -1864.234342 a.u.

Imaginary frequency: -332.3360 cm<sup>-1</sup>

### Cartesian coordinates

| ATOM | X          | Y           | Z           |
|------|------------|-------------|-------------|
| C    | 0.63718600 | -3.35079200 | -0.21321300 |
| H    | 0.56703200 | -4.33421400 | 0.28385700  |

|    |             |             |             |
|----|-------------|-------------|-------------|
| H  | 1.41067400  | -3.44378300 | -0.98767200 |
| S  | -0.72956400 | -1.27933200 | -1.58602900 |
| C  | -0.73259100 | -3.06040000 | -0.84472800 |
| H  | -0.98251400 | -3.73718200 | -1.66510700 |
| H  | -1.53637300 | -3.04727000 | -0.10394900 |
| C  | -2.21817700 | -0.58711000 | -0.77890500 |
| C  | -4.15080700 | 0.84048000  | -0.09018800 |
| C  | -3.97599400 | -0.38634400 | 0.61183700  |
| C  | -5.19378800 | 1.72252700  | 0.22724200  |
| C  | -4.86545500 | -0.74000500 | 1.64432200  |
| C  | -6.07543000 | 1.35691200  | 1.26077000  |
| H  | -5.32259700 | 2.66226900  | -0.30107800 |
| C  | -5.91275600 | 0.13705500  | 1.96174500  |
| H  | -4.72336000 | -1.67595700 | 2.17564200  |
| H  | -6.89141500 | 2.02430600  | 1.52533800  |
| H  | -6.60698900 | -0.11904000 | 2.75767400  |
| S  | -2.86289400 | 1.02614900  | -1.35959500 |
| N  | -2.87310200 | -1.15665600 | 0.18895600  |
| Pd | 1.28599700  | -0.47387500 | -0.25615600 |
| C  | 3.16861100  | -0.22228800 | 0.68478500  |
| C  | 4.30729500  | -0.37508700 | -0.13922500 |
| C  | 3.17843000  | 0.73426200  | 1.72775400  |
| C  | 5.43737600  | 0.43857800  | 0.06309200  |
| H  | 4.30867100  | -1.10947700 | -0.94192000 |
| C  | 4.30959700  | 1.54682100  | 1.92130100  |
| H  | 2.30050900  | 0.86769900  | 2.35389300  |
| C  | 5.44242700  | 1.39868200  | 1.09439200  |
| H  | 6.30532100  | 0.32538700  | -0.58271000 |
| H  | 4.30288500  | 2.29642600  | 2.70931800  |
| H  | 6.31699100  | 2.02602400  | 1.25088000  |
| O  | 1.55100100  | 1.34324000  | -1.30402900 |
| C  | 1.00030700  | 2.35202100  | -0.63456300 |
| C  | 1.22216200  | 3.72983900  | -1.24712900 |
| H  | 0.53242500  | 4.45474500  | -0.80597100 |
| H  | 2.25360800  | 4.04992200  | -1.04892100 |
| H  | 1.09145500  | 3.68797100  | -2.33376300 |
| O  | 0.35042900  | 2.19623700  | 0.44826100  |
| C  | 2.38380000  | -2.05485200 | 1.21540600  |
| H  | 2.57254500  | -1.82870400 | 2.26079200  |
| H  | 3.16608100  | -2.64545800 | 0.74136000  |
| C  | 1.02308000  | -2.27480600 | 0.80289800  |
| H  | 0.24718000  | -2.05664900 | 1.54335300  |

### TS1'\_S7

B3LYP SCF energy: -1087.43237100 a.u.

B3LYP enthalpy: -1087.069363 a.u.



B3LYP free energy: -1087.152617 a.u.  
M06 SCF energy in solution: -1864.51140184 a.u.  
M06 enthalpy in solution: -1864.148394 a.u.  
M06 free energy in solution: -1864.231648 a.u.  
Imaginary frequency: -318.5045 cm<sup>-1</sup>

Cartesian coordinates

| ATOM | X           | Y           | Z           |
|------|-------------|-------------|-------------|
| C    | -0.04080000 | 3.27335700  | -0.20659400 |
| H    | -1.01025900 | 3.45955300  | 0.27999800  |
| C    | -0.15401200 | 2.05068700  | -1.11596400 |
| H    | 0.75315500  | 1.79972200  | -1.67135800 |
| C    | -1.40153700 | 1.76661800  | -1.77625100 |
| H    | -2.23145800 | 2.45301200  | -1.62280800 |
| H    | 0.17118700  | 4.15150000  | -0.83768900 |
| H    | -1.36087600 | 1.33659700  | -2.77311200 |
| O    | -1.09040200 | -1.49469500 | 1.06226100  |
| C    | -1.58968600 | -1.11914300 | 2.23986700  |
| O    | -1.66133900 | 0.09862700  | 2.60248600  |
| C    | -2.09911900 | -2.24955500 | 3.12396900  |
| H    | -3.06350900 | -2.60201900 | 2.73493700  |
| H    | -1.40502000 | -3.09676000 | 3.10260200  |
| H    | -2.23605100 | -1.89564100 | 4.14928300  |
| C    | 1.01662700  | 3.21968300  | 0.91430100  |
| H    | 1.08794500  | 4.18817600  | 1.41937900  |
| H    | 0.78061100  | 2.46505400  | 1.66891800  |
| S    | 2.80374200  | 2.92907300  | 0.31066700  |
| C    | 2.83725000  | 1.13834500  | 0.10803800  |
| C    | 2.42360000  | -1.37186100 | 0.17464200  |
| C    | 3.51139000  | -0.90278500 | -0.61204800 |
| C    | 2.07310400  | -2.72322500 | 0.23760400  |
| C    | 4.29133600  | -1.82290500 | -1.33500800 |
| C    | 2.86273000  | -3.63323800 | -0.49407300 |
| H    | 1.20632800  | -3.04632500 | 0.80500000  |
| C    | 3.96210600  | -3.18746700 | -1.26423000 |
| H    | 5.12265500  | -1.46426400 | -1.93359600 |
| H    | 2.61577200  | -4.69116500 | -0.46904300 |
| H    | 4.55609200  | -3.91069700 | -1.81688100 |
| Pd   | -0.62066800 | 0.26436200  | -0.07389100 |
| C    | -2.51990400 | 0.21999700  | -0.99821700 |
| C    | -3.58920700 | 0.61813700  | -0.16186900 |
| C    | -2.72230800 | -0.78890400 | -1.96723200 |
| C    | -4.84125500 | -0.01165100 | -0.28103400 |
| H    | -3.43637300 | 1.38041800  | 0.59707600  |
| C    | -3.97754600 | -1.41474500 | -2.07939400 |
| H    | -1.90723700 | -1.09424600 | -2.61990600 |
| C    | -5.04041800 | -1.02590600 | -1.24019000 |

|   |             |             |             |
|---|-------------|-------------|-------------|
| H | -5.65454600 | 0.28476300  | 0.37751600  |
| H | -4.12327500 | -2.19989500 | -2.81789500 |
| H | -6.01157100 | -1.50674800 | -1.33153000 |
| S | 1.62603900  | 0.02548300  | 1.04266600  |
| N | 3.68863900  | 0.50162200  | -0.63015900 |

# X-RAY CRYSTALLOGRAPHY

Experimental Summary for Crystal **6c'** (CCDC 1905653)

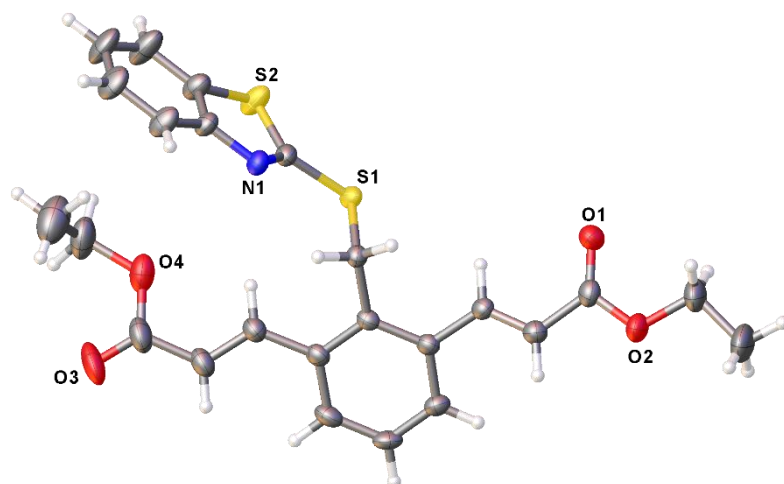

**Table S8.** Crystal data and structure refinement for **6c'**.

|                                   |                                                                 |              |
|-----------------------------------|-----------------------------------------------------------------|--------------|
| Empirical formula                 | C <sub>24</sub> H <sub>23</sub> N O <sub>4</sub> S <sub>2</sub> |              |
| Formula weight                    | 453.55                                                          |              |
| Temperature                       | 200 K                                                           |              |
| Wavelength                        | 1.54184 Å                                                       |              |
| Crystal system                    | Monoclinic                                                      |              |
| Space group                       | P 21/c                                                          |              |
| Unit cell dimensions              | a = 15.796 Å                                                    | □ = 90°.     |
|                                   | b = 15.246 Å                                                    | □ = 105.81°. |
|                                   | c = 9.849 Å                                                     | □ = 90°.     |
| Volume                            | 2282.1 Å <sup>3</sup>                                           |              |
| Z                                 | 4                                                               |              |
| Density (calculated)              | 1.320 Mg/m <sup>3</sup>                                         |              |
| Absorption coefficient            | 2.367 mm <sup>-1</sup>                                          |              |
| F(000)                            | 952                                                             |              |
| Crystal size                      | 0.26 x 0.26 x 0.06 mm <sup>3</sup>                              |              |
| Theta range for data collection   | 4.107 to 68.155°.                                               |              |
| Index ranges                      | -18 ≤ h ≤ 19, -14 ≤ k ≤ 17, -11 ≤ l ≤ 11                        |              |
| Reflections collected             | 13943                                                           |              |
| Independent reflections           | 4121 [R(int) = 0.0385]                                          |              |
| Completeness to theta = 67.684°   | 99.4 %                                                          |              |
| Absorption correction             | Semi-empirical from equivalents                                 |              |
| Max. and min. transmission        | 0.7530 and 0.6063                                               |              |
| Refinement method                 | Full-matrix least-squares on F <sup>2</sup>                     |              |
| Data / restraints / parameters    | 4121 / 33 / 311                                                 |              |
| Goodness-of-fit on F <sup>2</sup> | 1.016                                                           |              |
| Final R indices [I > 2σ(I)]       | R1 = 0.0471, wR2 = 0.1180                                       |              |
| R indices (all data)              | R1 = 0.0631, wR2 = 0.1300                                       |              |
| Extinction coefficient            | n/a                                                             |              |
| Largest diff. peak and hole       | 0.320 and -0.226 e.Å <sup>-3</sup>                              |              |

**Table S9.** Atomic coordinates ( $\times 10^4$ ) and equivalent isotropic displacement parameters ( $\text{\AA}^2 \times 10^3$ ) for **6c'**.  $U(\text{eq})$  is defined as one third of the trace of the orthogonalized  $U^{ij}$  tensor.

|        | x       | y       | z        | $U(\text{eq})$ |
|--------|---------|---------|----------|----------------|
| S(1)   | 5486(1) | 3911(1) | 4683(1)  | 37(1)          |
| S(2)   | 6678(1) | 4952(1) | 7001(1)  | 57(1)          |
| O(1)   | 2851(1) | 4112(1) | -323(2)  | 56(1)          |
| O(2)   | 2313(1) | 3043(1) | -1879(2) | 57(1)          |
| O(3)   | 8600(2) | 1002(2) | 7384(3)  | 84(1)          |
| N(1)   | 7192(1) | 4310(1) | 4918(2)  | 38(1)          |
| C(00E) | 6600(2) | 1873(2) | 5210(3)  | 43(1)          |
| C(1)   | 7771(2) | 5104(2) | 7013(3)  | 50(1)          |
| C(2)   | 8449(2) | 5511(3) | 8030(4)  | 74(1)          |
| C(3)   | 9270(2) | 5522(3) | 7826(4)  | 74(1)          |
| C(4)   | 9429(2) | 5145(2) | 6640(4)  | 64(1)          |
| C(5)   | 8762(2) | 4749(2) | 5629(3)  | 55(1)          |
| C(6)   | 7919(2) | 4717(2) | 5821(3)  | 41(1)          |
| C(7)   | 6525(2) | 4376(2) | 5411(3)  | 36(1)          |
| C(8)   | 5705(2) | 3236(1) | 3275(2)  | 32(1)          |
| C(9)   | 5306(2) | 2339(1) | 3250(2)  | 31(1)          |
| C(10)  | 4494(2) | 2139(1) | 2280(2)  | 32(1)          |
| C(11)  | 4165(2) | 1285(2) | 2207(3)  | 39(1)          |
| C(12)  | 4624(2) | 639(2)  | 3072(3)  | 45(1)          |
| C(13)  | 5411(2) | 832(2)  | 4036(3)  | 43(1)          |
| C(14)  | 5766(2) | 1677(2) | 4150(3)  | 35(1)          |
| C(15)  | 3970(2) | 2813(2) | 1350(2)  | 35(1)          |
| C(16)  | 3412(2) | 2659(2) | 104(3)   | 41(1)          |
| C(17)  | 2850(2) | 3360(2) | -685(3)  | 42(1)          |
| C(18)  | 1680(2) | 3656(2) | -2735(4) | 73(1)          |
| C(19)  | 1112(3) | 3145(3) | -3907(5) | 105(2)         |
| C(20)  | 7204(2) | 1289(2) | 5831(3)  | 50(1)          |
| C(21)  | 8019(2) | 1514(2) | 6905(4)  | 66(1)          |
| O(4)   | 7949(4) | 2325(5) | 7544(7)  | 68(2)          |
| C(22)  | 8684(5) | 2648(7) | 8750(8)  | 85(3)          |
| C(23)  | 9451(7) | 2931(7) | 8256(10) | 112(4)         |

|        |         |          |          |        |
|--------|---------|----------|----------|--------|
| O(4')  | 8174(5) | 2360(5)  | 7008(11) | 70(2)  |
| C(23') | 8977(7) | 2582(9)  | 8004(14) | 105(5) |
| C(24') | 8843(8) | 3097(12) | 9078(16) | 158(9) |

---

**Table S10.** Bond lengths [Å] and angles [°] for **6c'**.

---

|              |            |
|--------------|------------|
| S(1)-C(7)    | 1.753(2)   |
| S(1)-C(8)    | 1.834(2)   |
| S(2)-C(1)    | 1.738(3)   |
| S(2)-C(7)    | 1.753(2)   |
| O(1)-C(17)   | 1.201(3)   |
| O(2)-C(17)   | 1.338(3)   |
| O(2)-C(18)   | 1.458(4)   |
| O(3)-C(21)   | 1.199(4)   |
| N(1)-C(6)    | 1.392(3)   |
| N(1)-C(7)    | 1.279(3)   |
| C(00E)-C(14) | 1.471(3)   |
| C(00E)-C(20) | 1.325(4)   |
| C(1)-C(2)    | 1.397(4)   |
| C(1)-C(6)    | 1.390(4)   |
| C(2)-C(3)    | 1.365(5)   |
| C(3)-C(4)    | 1.385(5)   |
| C(4)-C(5)    | 1.376(4)   |
| C(5)-C(6)    | 1.395(4)   |
| C(8)-C(9)    | 1.504(3)   |
| C(9)-C(10)   | 1.407(3)   |
| C(9)-C(14)   | 1.408(3)   |
| C(10)-C(11)  | 1.398(3)   |
| C(10)-C(15)  | 1.471(3)   |
| C(11)-C(12)  | 1.372(4)   |
| C(12)-C(13)  | 1.375(4)   |
| C(13)-C(14)  | 1.397(3)   |
| C(15)-C(16)  | 1.321(3)   |
| C(16)-C(17)  | 1.470(4)   |
| C(18)-C(19)  | 1.477(5)   |
| C(20)-C(21)  | 1.468(4)   |
| C(21)-O(4)   | 1.405(8)   |
| C(21)-O(4')  | 1.312(9)   |
| O(4)-C(22)   | 1.4998(10) |
| C(22)-C(23)  | 1.487(12)  |

|                    |            |
|--------------------|------------|
| O(4')-C(23')       | 1.416(10)  |
| C(23')-C(24')      | 1.380(14)  |
| C(7)-S(1)-C(8)     | 100.80(11) |
| C(1)-S(2)-C(7)     | 88.17(12)  |
| C(17)-O(2)-C(18)   | 116.5(2)   |
| C(7)-N(1)-C(6)     | 110.1(2)   |
| C(20)-C(00E)-C(14) | 125.7(3)   |
| C(2)-C(1)-S(2)     | 129.1(2)   |
| C(6)-C(1)-S(2)     | 109.45(19) |
| C(6)-C(1)-C(2)     | 121.4(3)   |
| C(3)-C(2)-C(1)     | 118.3(3)   |
| C(2)-C(3)-C(4)     | 121.1(3)   |
| C(5)-C(4)-C(3)     | 120.8(3)   |
| C(4)-C(5)-C(6)     | 119.3(3)   |
| N(1)-C(6)-C(5)     | 125.5(2)   |
| C(1)-C(6)-N(1)     | 115.4(2)   |
| C(1)-C(6)-C(5)     | 119.1(2)   |
| S(1)-C(7)-S(2)     | 117.00(14) |
| N(1)-C(7)-S(1)     | 126.12(19) |
| N(1)-C(7)-S(2)     | 116.84(18) |
| C(9)-C(8)-S(1)     | 110.94(16) |
| C(10)-C(9)-C(8)    | 120.5(2)   |
| C(10)-C(9)-C(14)   | 119.4(2)   |
| C(14)-C(9)-C(8)    | 120.0(2)   |
| C(9)-C(10)-C(15)   | 121.7(2)   |
| C(11)-C(10)-C(9)   | 119.6(2)   |
| C(11)-C(10)-C(15)  | 118.7(2)   |
| C(12)-C(11)-C(10)  | 120.7(2)   |
| C(11)-C(12)-C(13)  | 120.1(2)   |
| C(12)-C(13)-C(14)  | 121.3(2)   |
| C(9)-C(14)-C(00E)  | 120.7(2)   |
| C(13)-C(14)-C(00E) | 120.4(2)   |
| C(13)-C(14)-C(9)   | 118.9(2)   |
| C(16)-C(15)-C(10)  | 125.0(2)   |
| C(15)-C(16)-C(17)  | 121.0(2)   |

|                     |           |
|---------------------|-----------|
| O(1)-C(17)-O(2)     | 123.7(2)  |
| O(1)-C(17)-C(16)    | 125.8(2)  |
| O(2)-C(17)-C(16)    | 110.4(2)  |
| O(2)-C(18)-C(19)    | 106.8(3)  |
| C(00E)-C(20)-C(21)  | 123.8(3)  |
| O(3)-C(21)-C(20)    | 124.0(4)  |
| O(3)-C(21)-O(4)     | 122.8(4)  |
| O(3)-C(21)-O(4')    | 120.2(4)  |
| O(4)-C(21)-C(20)    | 111.5(3)  |
| O(4')-C(21)-C(20)   | 113.2(4)  |
| C(21)-O(4)-C(22)    | 120.3(7)  |
| C(23)-C(22)-O(4)    | 111.1(8)  |
| C(21)-O(4')-C(23')  | 113.6(8)  |
| C(24')-C(23')-O(4') | 111.8(11) |

---

Symmetry transformations used to generate equivalent atoms:



**Table S11.** Anisotropic displacement parameters ( $\text{\AA}^2 \times 10^3$ ) for **6c'**. The anisotropic displacement factor exponent takes the form:  $-2h^2 [h^2 a^{*2} U^{11} + \dots + 2hk a^* b^* U^{12}]$

|        | U11   | U22    | U33   | U23    | U13    | U12    |
|--------|-------|--------|-------|--------|--------|--------|
| S(1)   | 29(1) | 33(1)  | 49(1) | -8(1)  | 10(1)  | -2(1)  |
| S(2)   | 41(1) | 71(1)  | 62(1) | -32(1) | 19(1)  | -13(1) |
| O(1)   | 57(1) | 40(1)  | 59(1) | -2(1)  | -1(1)  | 7(1)   |
| O(2)   | 53(1) | 51(1)  | 52(1) | 1(1)   | -13(1) | 1(1)   |
| O(3)   | 50(1) | 94(2)  | 96(2) | 42(2)  | 1(1)   | 25(1)  |
| N(1)   | 32(1) | 40(1)  | 42(1) | -5(1)  | 8(1)   | -7(1)  |
| C(00E) | 43(1) | 35(1)  | 49(2) | 5(1)   | 7(1)   | 6(1)   |
| C(1)   | 40(1) | 53(2)  | 57(2) | -17(1) | 13(1)  | -10(1) |
| C(2)   | 54(2) | 97(3)  | 70(2) | -46(2) | 17(2)  | -25(2) |
| C(3)   | 49(2) | 95(3)  | 74(2) | -33(2) | 7(2)   | -29(2) |
| C(4)   | 41(2) | 79(2)  | 72(2) | -17(2) | 16(1)  | -21(2) |
| C(5)   | 42(2) | 68(2)  | 58(2) | -16(2) | 20(1)  | -18(1) |
| C(6)   | 37(1) | 40(1)  | 44(1) | -6(1)  | 8(1)   | -10(1) |
| C(7)   | 34(1) | 28(1)  | 42(1) | 1(1)   | 7(1)   | -2(1)  |
| C(8)   | 34(1) | 30(1)  | 33(1) | 1(1)   | 9(1)   | 1(1)   |
| C(9)   | 34(1) | 27(1)  | 34(1) | 0(1)   | 13(1)  | 2(1)   |
| C(10)  | 35(1) | 28(1)  | 36(1) | -5(1)  | 13(1)  | 1(1)   |
| C(11)  | 44(1) | 33(1)  | 41(1) | -5(1)  | 12(1)  | -4(1)  |
| C(12)  | 60(2) | 26(1)  | 52(2) | -5(1)  | 17(1)  | -6(1)  |
| C(13)  | 53(2) | 26(1)  | 53(2) | 6(1)   | 17(1)  | 9(1)   |
| C(14)  | 36(1) | 32(1)  | 38(1) | 1(1)   | 12(1)  | 6(1)   |
| C(15)  | 31(1) | 31(1)  | 41(1) | -4(1)  | 9(1)   | -3(1)  |
| C(16)  | 43(1) | 34(1)  | 43(1) | -4(1)  | 7(1)   | -1(1)  |
| C(17)  | 35(1) | 45(2)  | 43(1) | 1(1)   | 5(1)   | -3(1)  |
| C(18)  | 60(2) | 68(2)  | 70(2) | 8(2)   | -18(2) | 9(2)   |
| C(19)  | 84(3) | 94(3)  | 98(3) | 3(3)   | -42(2) | 4(2)   |
| C(20)  | 44(2) | 47(2)  | 57(2) | 13(1)  | 10(1)  | 13(1)  |
| C(21)  | 50(2) | 70(2)  | 69(2) | 23(2)  | 1(2)   | 13(2)  |
| O(4)   | 50(3) | 95(3)  | 51(3) | 2(2)   | 0(2)   | 8(2)   |
| C(22)  | 57(4) | 126(7) | 57(5) | -11(4) | -8(3)  | 12(4)  |
| C(23)  | 95(6) | 131(8) | 93(7) | 21(6)  | -5(5)  | -25(6) |

|        |       |         |         |          |        |      |
|--------|-------|---------|---------|----------|--------|------|
| O(4')  | 50(4) | 70(3)   | 69(5)   | -8(3)    | -19(3) | 7(3) |
| C(23') | 47(5) | 137(9)  | 105(8)  | -54(7)   | -21(5) | 8(5) |
| C(24') | 58(7) | 244(19) | 145(11) | -130(12) | -16(7) | 2(9) |

---

**Table S12.** Hydrogen coordinates ( $\times 10^4$ ) and isotropic displacement parameters ( $\text{\AA}^2 \times 10^3$ ) for **6c'**.

|        | x     | y    | z     | U(eq) |
|--------|-------|------|-------|-------|
| H(00E) | 6715  | 2469 | 5472  | 52    |
| H(2)   | 8343  | 5772 | 8843  | 88    |
| H(3)   | 9740  | 5794 | 8508  | 89    |
| H(4)   | 10007 | 5159 | 6522  | 76    |
| H(5)   | 8873  | 4501 | 4810  | 66    |
| H(8A)  | 5457  | 3527 | 2353  | 39    |
| H(8B)  | 6348  | 3180 | 3425  | 39    |
| H(11)  | 3618  | 1149 | 1552  | 47    |
| H(12)  | 4398  | 59   | 3004  | 55    |
| H(13)  | 5721  | 381  | 4637  | 52    |
| H(15)  | 4038  | 3403 | 1669  | 42    |
| H(16)  | 3375  | 2086 | -287  | 49    |
| H(18A) | 1988  | 4125 | -3106 | 88    |
| H(18B) | 1324  | 3929 | -2163 | 88    |
| H(19A) | 1470  | 2896 | -4484 | 158   |
| H(19B) | 660   | 3529 | -4492 | 158   |
| H(19C) | 829   | 2669 | -3524 | 158   |
| H(20)  | 7102  | 691  | 5565  | 60    |
| H(22A) | 8474  | 3148 | 9212  | 102   |
| H(22B) | 8868  | 2175 | 9456  | 102   |
| H(23A) | 9255  | 3349 | 7477  | 169   |
| H(23B) | 9714  | 2419 | 7929  | 169   |
| H(23C) | 9888  | 3212 | 9035  | 169   |
| H(23D) | 9286  | 2037 | 8409  | 126   |
| H(23E) | 9357  | 2900 | 7520  | 126   |
| H(24A) | 8454  | 3587 | 8675  | 236   |
| H(24B) | 9409  | 3326 | 9646  | 236   |
| H(24C) | 8571  | 2744 | 9677  | 236   |

Experimental Summary for Crystal **6d** (CCDC 1905643)

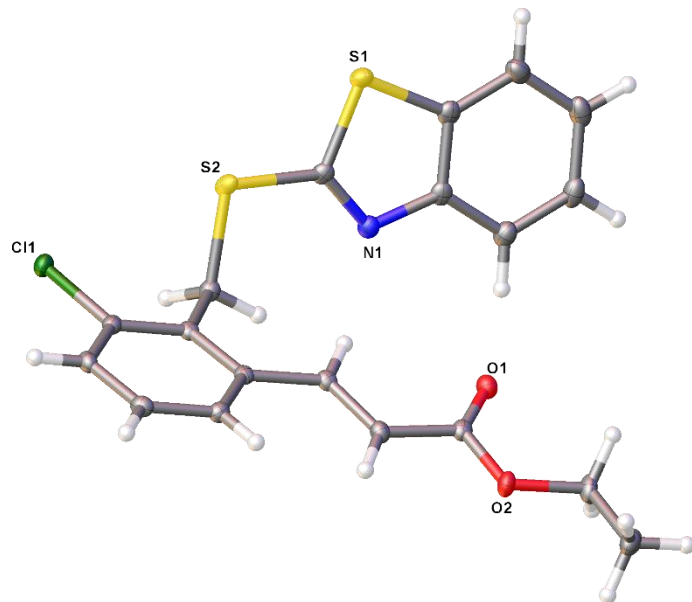

**Table S13.** Crystal data and structure refinement for **6d**.

|                                   |                                                                    |                  |
|-----------------------------------|--------------------------------------------------------------------|------------------|
| Empirical formula                 | C <sub>19</sub> H <sub>16</sub> Cl N O <sub>2</sub> S <sub>2</sub> |                  |
| Formula weight                    | 389.90                                                             |                  |
| Temperature                       | 100.0 K                                                            |                  |
| Wavelength                        | 1.54178 Å                                                          |                  |
| Crystal system                    | Triclinic                                                          |                  |
| Space group                       | P-1                                                                |                  |
| Unit cell dimensions              | a = 6.56960(10) Å                                                  | α = 79.9110(10)° |
|                                   | b = 10.4589(2) Å                                                   | β = 84.1890(10)° |
|                                   | c = 13.1664(3) Å                                                   | γ = 81.3560(10)° |
| Volume                            | 877.96(3) Å <sup>3</sup>                                           |                  |
| Z                                 | 2                                                                  |                  |
| Density (calculated)              | 1.475 Mg/m <sup>3</sup>                                            |                  |
| Absorption coefficient            | 4.255 mm <sup>-1</sup>                                             |                  |
| F(000)                            | 404                                                                |                  |
| Crystal size                      | 0.3 x 0.28 x 0.26 mm <sup>3</sup>                                  |                  |
| Theta range for data collection   | 3.420 to 68.330°                                                   |                  |
| Index ranges                      | -7 ≤ h ≤ 7, -12 ≤ k ≤ 12, -15 ≤ l ≤ 15                             |                  |
| Reflections collected             | 10384                                                              |                  |
| Independent reflections           | 3141 [R(int) = 0.0225]                                             |                  |
| Completeness to theta = 67.679°   | 98.1 %                                                             |                  |
| Absorption correction             | Semi-empirical from equivalents                                    |                  |
| Max. and min. transmission        | 0.7531 and 0.5864                                                  |                  |
| Refinement method                 | Full-matrix least-squares on F <sup>2</sup>                        |                  |
| Data / restraints / parameters    | 3141 / 0 / 227                                                     |                  |
| Goodness-of-fit on F <sup>2</sup> | 1.042                                                              |                  |
| Final R indices [I > 2σ(I)]       | R1 = 0.0279, wR2 = 0.0736                                          |                  |
| R indices (all data)              | R1 = 0.0295, wR2 = 0.0751                                          |                  |
| Extinction coefficient            | n/a                                                                |                  |
| Largest diff. peak and hole       | 0.346 and -0.217 e.Å <sup>-3</sup>                                 |                  |

**Table S14.** Atomic coordinates ( $\times 10^4$ ) and equivalent isotropic displacement parameters ( $\text{\AA}^2 \times 10^3$ ) for **6d**.  $U(\text{eq})$  is defined as one third of the trace of the orthogonalized  $U^{ij}$  tensor.

|       | x        | y       | z       | $U(\text{eq})$ |
|-------|----------|---------|---------|----------------|
| Cl(1) | 14164(1) | 3208(1) | 9144(1) | 20(1)          |
| S(1)  | 7011(1)  | -220(1) | 9036(1) | 22(1)          |
| S(2)  | 10146(1) | 1578(1) | 8809(1) | 22(1)          |
| O(2)  | 2966(2)  | 6451(1) | 5973(1) | 20(1)          |
| O(1)  | 4213(2)  | 4300(1) | 6168(1) | 21(1)          |
| N(1)  | 7625(2)  | 1406(1) | 7327(1) | 18(1)          |
| C(11) | 10675(2) | 4152(1) | 8155(1) | 15(1)          |
| C(19) | 6053(2)  | 710(1)  | 7180(1) | 18(1)          |
| C(9)  | 12008(2) | 5609(2) | 9113(1) | 18(1)          |
| C(6)  | 8981(2)  | 5124(1) | 7918(1) | 15(1)          |
| C(7)  | 8856(2)  | 6322(2) | 8276(1) | 17(1)          |
| C(5)  | 7337(2)  | 4880(2) | 7322(1) | 16(1)          |
| C(10) | 12127(2) | 4423(2) | 8767(1) | 16(1)          |
| C(3)  | 4313(2)  | 5399(2) | 6311(1) | 17(1)          |
| C(4)  | 5904(2)  | 5785(2) | 6876(1) | 18(1)          |
| C(14) | 5504(2)  | -222(2) | 8023(1) | 21(1)          |
| C(8)  | 10357(2) | 6561(2) | 8857(1) | 18(1)          |
| C(18) | 5031(3)  | 877(2)  | 6276(1) | 23(1)          |
| C(13) | 8235(2)  | 1015(1) | 8243(1) | 17(1)          |
| C(12) | 10964(2) | 2856(2) | 7777(1) | 18(1)          |
| C(2)  | 1338(2)  | 6192(2) | 5397(1) | 22(1)          |
| C(16) | 2986(3)  | -828(2) | 7093(2) | 28(1)          |
| C(17) | 3512(3)  | 97(2)   | 6245(1) | 26(1)          |
| C(1)  | -172(3)  | 7423(2) | 5225(1) | 28(1)          |
| C(15) | 3971(3)  | -996(2) | 7993(1) | 27(1)          |

**Table S15.** Bond lengths [Å] and angles [°] for **6d**.

---

|              |            |
|--------------|------------|
| Cl(1)-C(10)  | 1.7477(15) |
| S(1)-C(14)   | 1.7391(16) |
| S(1)-C(13)   | 1.7534(16) |
| S(2)-C(13)   | 1.7448(15) |
| S(2)-C(12)   | 1.8307(16) |
| O(2)-C(3)    | 1.3446(19) |
| O(2)-C(2)    | 1.4546(18) |
| O(1)-C(3)    | 1.2087(19) |
| N(1)-C(19)   | 1.396(2)   |
| N(1)-C(13)   | 1.288(2)   |
| C(11)-C(6)   | 1.409(2)   |
| C(11)-C(10)  | 1.398(2)   |
| C(11)-C(12)  | 1.504(2)   |
| C(19)-C(14)  | 1.400(2)   |
| C(19)-C(18)  | 1.397(2)   |
| C(9)-H(9)    | 0.9500     |
| C(9)-C(10)   | 1.384(2)   |
| C(9)-C(8)    | 1.384(2)   |
| C(6)-C(7)    | 1.402(2)   |
| C(6)-C(5)    | 1.474(2)   |
| C(7)-H(7)    | 0.9500     |
| C(7)-C(8)    | 1.384(2)   |
| C(5)-H(5)    | 0.9500     |
| C(5)-C(4)    | 1.333(2)   |
| C(3)-C(4)    | 1.482(2)   |
| C(4)-H(4)    | 0.9500     |
| C(14)-C(15)  | 1.391(2)   |
| C(8)-H(8)    | 0.9500     |
| C(18)-H(18)  | 0.9500     |
| C(18)-C(17)  | 1.388(2)   |
| C(12)-H(12A) | 0.9900     |
| C(12)-H(12B) | 0.9900     |
| C(2)-H(2A)   | 0.9900     |
| C(2)-H(2B)   | 0.9900     |

|             |          |
|-------------|----------|
| C(2)-C(1)   | 1.501(2) |
| C(16)-H(16) | 0.9500   |
| C(16)-C(17) | 1.396(3) |
| C(16)-C(15) | 1.379(3) |
| C(17)-H(17) | 0.9500   |
| C(1)-H(1A)  | 0.9800   |
| C(1)-H(1B)  | 0.9800   |
| C(1)-H(1C)  | 0.9800   |
| C(15)-H(15) | 0.9500   |

|                   |            |
|-------------------|------------|
| C(14)-S(1)-C(13)  | 88.22(8)   |
| C(13)-S(2)-C(12)  | 101.77(7)  |
| C(3)-O(2)-C(2)    | 115.31(12) |
| C(13)-N(1)-C(19)  | 109.67(13) |
| C(6)-C(11)-C(12)  | 122.63(13) |
| C(10)-C(11)-C(6)  | 117.80(13) |
| C(10)-C(11)-C(12) | 119.57(13) |
| N(1)-C(19)-C(14)  | 115.43(14) |
| N(1)-C(19)-C(18)  | 125.29(15) |
| C(18)-C(19)-C(14) | 119.27(15) |
| C(10)-C(9)-H(9)   | 120.8      |
| C(10)-C(9)-C(8)   | 118.45(14) |
| C(8)-C(9)-H(9)    | 120.8      |
| C(11)-C(6)-C(5)   | 120.74(13) |
| C(7)-C(6)-C(11)   | 119.08(13) |
| C(7)-C(6)-C(5)    | 120.17(14) |
| C(6)-C(7)-H(7)    | 119.4      |
| C(8)-C(7)-C(6)    | 121.22(14) |
| C(8)-C(7)-H(7)    | 119.4      |
| C(6)-C(5)-H(5)    | 117.0      |
| C(4)-C(5)-C(6)    | 126.01(14) |
| C(4)-C(5)-H(5)    | 117.0      |
| C(11)-C(10)-Cl(1) | 119.25(12) |
| C(9)-C(10)-Cl(1)  | 117.72(12) |
| C(9)-C(10)-C(11)  | 123.01(14) |
| O(2)-C(3)-C(4)    | 110.39(13) |

|                     |            |
|---------------------|------------|
| O(1)-C(3)-O(2)      | 123.96(14) |
| O(1)-C(3)-C(4)      | 125.65(14) |
| C(5)-C(4)-C(3)      | 120.37(14) |
| C(5)-C(4)-H(4)      | 119.8      |
| C(3)-C(4)-H(4)      | 119.8      |
| C(19)-C(14)-S(1)    | 109.49(12) |
| C(15)-C(14)-S(1)    | 128.34(13) |
| C(15)-C(14)-C(19)   | 122.17(15) |
| C(9)-C(8)-C(7)      | 120.41(14) |
| C(9)-C(8)-H(8)      | 119.8      |
| C(7)-C(8)-H(8)      | 119.8      |
| C(19)-C(18)-H(18)   | 120.8      |
| C(17)-C(18)-C(19)   | 118.46(16) |
| C(17)-C(18)-H(18)   | 120.8      |
| S(2)-C(13)-S(1)     | 115.10(9)  |
| N(1)-C(13)-S(1)     | 117.18(12) |
| N(1)-C(13)-S(2)     | 127.72(12) |
| S(2)-C(12)-H(12A)   | 109.6      |
| S(2)-C(12)-H(12B)   | 109.6      |
| C(11)-C(12)-S(2)    | 110.22(10) |
| C(11)-C(12)-H(12A)  | 109.6      |
| C(11)-C(12)-H(12B)  | 109.6      |
| H(12A)-C(12)-H(12B) | 108.1      |
| O(2)-C(2)-H(2A)     | 110.2      |
| O(2)-C(2)-H(2B)     | 110.2      |
| O(2)-C(2)-C(1)      | 107.54(13) |
| H(2A)-C(2)-H(2B)    | 108.5      |
| C(1)-C(2)-H(2A)     | 110.2      |
| C(1)-C(2)-H(2B)     | 110.2      |
| C(17)-C(16)-H(16)   | 119.7      |
| C(15)-C(16)-H(16)   | 119.7      |
| C(15)-C(16)-C(17)   | 120.62(16) |
| C(18)-C(17)-C(16)   | 121.49(16) |
| C(18)-C(17)-H(17)   | 119.3      |
| C(16)-C(17)-H(17)   | 119.3      |
| C(2)-C(1)-H(1A)     | 109.5      |



|                   |            |
|-------------------|------------|
| C(2)-C(1)-H(1B)   | 109.5      |
| C(2)-C(1)-H(1C)   | 109.5      |
| H(1A)-C(1)-H(1B)  | 109.5      |
| H(1A)-C(1)-H(1C)  | 109.5      |
| H(1B)-C(1)-H(1C)  | 109.5      |
| C(14)-C(15)-H(15) | 121.0      |
| C(16)-C(15)-C(14) | 117.98(16) |
| C(16)-C(15)-H(15) | 121.0      |

---

Symmetry transformations used to generate equivalent atoms:

**Table S16.** Anisotropic displacement parameters ( $\text{\AA}^2 \times 10^3$ ) for **6d**. The anisotropic displacement factor exponent takes the form:  $-2h^2 [h^2 a^{*2} U^{11} + \dots + 2 h k a^* b^* U^{12}]$

|       | U11   | U22   | U33   | U23    | U13    | U12   |
|-------|-------|-------|-------|--------|--------|-------|
| Cl(1) | 17(1) | 21(1) | 21(1) | -3(1)  | -5(1)  | 0(1)  |
| S(1)  | 26(1) | 18(1) | 22(1) | 1(1)   | -5(1)  | -4(1) |
| S(2)  | 31(1) | 16(1) | 21(1) | -2(1)  | -11(1) | -4(1) |
| O(2)  | 16(1) | 24(1) | 22(1) | -7(1)  | -6(1)  | 0(1)  |
| O(1)  | 20(1) | 22(1) | 21(1) | -6(1)  | -2(1)  | -5(1) |
| N(1)  | 21(1) | 16(1) | 19(1) | -6(1)  | -3(1)  | -1(1) |
| C(11) | 16(1) | 18(1) | 12(1) | -4(1)  | 2(1)   | -4(1) |
| C(19) | 18(1) | 14(1) | 24(1) | -8(1)  | -3(1)  | 3(1)  |
| C(9)  | 18(1) | 21(1) | 16(1) | -4(1)  | -2(1)  | -7(1) |
| C(6)  | 16(1) | 18(1) | 12(1) | -3(1)  | 1(1)   | -4(1) |
| C(7)  | 17(1) | 18(1) | 16(1) | -3(1)  | 0(1)   | -1(1) |
| C(5)  | 16(1) | 18(1) | 15(1) | -5(1)  | 2(1)   | -4(1) |
| C(10) | 15(1) | 18(1) | 14(1) | -1(1)  | 0(1)   | -2(1) |
| C(3)  | 15(1) | 21(1) | 14(1) | -4(1)  | 2(1)   | -2(1) |
| C(4)  | 17(1) | 19(1) | 18(1) | -5(1)  | 0(1)   | -4(1) |
| C(14) | 20(1) | 16(1) | 26(1) | -7(1)  | -4(1)  | 3(1)  |
| C(8)  | 22(1) | 16(1) | 17(1) | -5(1)  | 1(1)   | -4(1) |
| C(18) | 25(1) | 21(1) | 24(1) | -7(1)  | -6(1)  | 0(1)  |
| C(13) | 20(1) | 12(1) | 19(1) | -6(1)  | -2(1)  | 2(1)  |
| C(12) | 18(1) | 19(1) | 17(1) | -5(1)  | -2(1)  | -1(1) |
| C(2)  | 16(1) | 35(1) | 18(1) | -9(1)  | -5(1)  | -3(1) |
| C(16) | 22(1) | 21(1) | 45(1) | -13(1) | -6(1)  | -2(1) |
| C(17) | 24(1) | 24(1) | 33(1) | -14(1) | -10(1) | 3(1)  |
| C(1)  | 20(1) | 37(1) | 26(1) | 1(1)   | -5(1)  | -2(1) |
| C(15) | 24(1) | 20(1) | 37(1) | -3(1)  | -2(1)  | -4(1) |

**Table S17.** Hydrogen coordinates ( $\times 10^4$ ) and isotropic displacement parameters ( $\text{\AA}^2 \times 10^3$ ) for **6d**.

|        | x     | y     | z    | U(eq) |
|--------|-------|-------|------|-------|
| H(9)   | 13036 | 5765  | 9517 | 21    |
| H(7)   | 7721  | 6981  | 8116 | 21    |
| H(5)   | 7296  | 3997  | 7248 | 19    |
| H(4)   | 5902  | 6682  | 6920 | 21    |
| H(8)   | 10252 | 7385  | 9082 | 22    |
| H(18)  | 5367  | 1510  | 5696 | 28    |
| H(12A) | 12436 | 2620  | 7551 | 22    |
| H(12B) | 10142 | 2925  | 7175 | 22    |
| H(2A)  | 640   | 5464  | 5793 | 27    |
| H(2B)  | 1926  | 5944  | 4725 | 27    |
| H(16)  | 1939  | -1348 | 7050 | 34    |
| H(17)  | 2814  | 196   | 5632 | 32    |
| H(1A)  | 524   | 8129  | 4811 | 42    |
| H(1B)  | -712  | 7674  | 5894 | 42    |
| H(1C)  | -1314 | 7270  | 4857 | 42    |
| H(15)  | 3614  | -1620 | 8575 | 32    |

Experimental Summary for Crystal **6e** (CCDC 1905647)

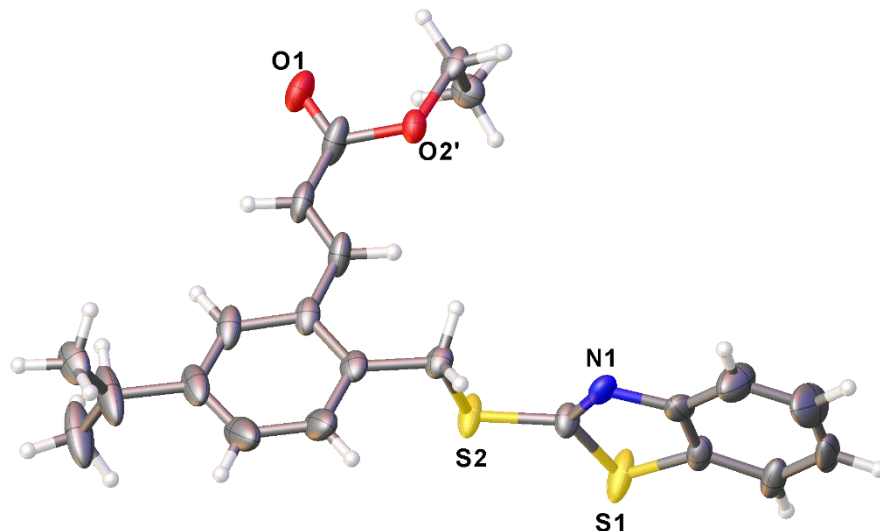

**Table S18.** Crystal data and structure refinement for **6e**.

|                                   |                                                                 |                 |
|-----------------------------------|-----------------------------------------------------------------|-----------------|
| Empirical formula                 | C <sub>22</sub> H <sub>23</sub> N O <sub>2</sub> S <sub>2</sub> |                 |
| Formula weight                    | 397.53                                                          |                 |
| Temperature                       | 100.0 K                                                         |                 |
| Wavelength                        | 1.54178 Å                                                       |                 |
| Crystal system                    | Triclinic                                                       |                 |
| Space group                       | P-1                                                             |                 |
| Unit cell dimensions              | a = 8.6349(6) Å                                                 | ∠ = 70.251(5)°. |
|                                   | b = 9.3163(4) Å                                                 | ∠ = 85.755(5)°. |
|                                   | c = 13.5605(9) Å                                                | ∠ = 83.165(5)°. |
| Volume                            | 1018.75(11) Å <sup>3</sup>                                      |                 |
| Z                                 | 2                                                               |                 |
| Density (calculated)              | 1.296 Mg/m <sup>3</sup>                                         |                 |
| Absorption coefficient            | 2.496 mm <sup>-1</sup>                                          |                 |
| F(000)                            | 420                                                             |                 |
| Crystal size                      | 0.28 x 0.27 x 0.22 mm <sup>3</sup>                              |                 |
| Theta range for data collection   | 3.465 to 65.996°.                                               |                 |
| Index ranges                      | -10 ≤ h ≤ 10, -9 ≤ k ≤ 11, -16 ≤ l ≤ 16                         |                 |
| Reflections collected             | 10983                                                           |                 |
| Independent reflections           | 3493 [R(int) = 0.0399]                                          |                 |
| Completeness to theta = 65.996°   | 98.5 %                                                          |                 |
| Absorption correction             | Semi-empirical from equivalents                                 |                 |
| Max. and min. transmission        | 0.7531 and 0.5935                                               |                 |
| Refinement method                 | Full-matrix least-squares on F <sup>2</sup>                     |                 |
| Data / restraints / parameters    | 3493 / 3 / 296                                                  |                 |
| Goodness-of-fit on F <sup>2</sup> | 1.044                                                           |                 |
| Final R indices [I > 2σ(I)]       | R1 = 0.0757, wR2 = 0.1763                                       |                 |
| R indices (all data)              | R1 = 0.0943, wR2 = 0.1909                                       |                 |
| Extinction coefficient            | n/a                                                             |                 |
| Largest diff. peak and hole       | 1.034 and -0.939 e.Å <sup>-3</sup>                              |                 |

**Table S19.** Atomic coordinates ( $\times 10^4$ ) and equivalent isotropic displacement parameters ( $\text{\AA}^2 \times 10^3$ ) for **6e**.  $U(\text{eq})$  is defined as one third of the trace of the orthogonalized  $U_{ij}$  tensor.

|        | x         | y         | z        | U(eq)  |
|--------|-----------|-----------|----------|--------|
| S(2)   | 6709(2)   | 4372(1)   | 4539(1)  | 54(1)  |
| S(1)   | 5306(2)   | 1925(1)   | 6299(1)  | 70(1)  |
| O(1)   | 3694(4)   | 8297(3)   | -214(2)  | 57(1)  |
| N(1)   | 7230(4)   | 1337(4)   | 4869(3)  | 43(1)  |
| C(15)  | 5701(5)   | 7738(4)   | 990(3)   | 46(1)  |
| C(006) | 6512(5)   | 2428(4)   | 5154(3)  | 38(1)  |
| C(13)  | 7858(5)   | 7067(4)   | 2237(3)  | 42(1)  |
| C(6)   | 6806(5)   | -64(5)    | 5576(3)  | 45(1)  |
| C(1)   | 5796(5)   | 24(5)     | 6388(3)  | 44(1)  |
| C(7)   | 8164(5)   | 4312(5)   | 3511(3)  | 40(1)  |
| C(8)   | 8656(5)   | 5908(5)   | 3044(3)  | 41(1)  |
| C(14)  | 6497(5)   | 6774(5)   | 1778(4)  | 50(1)  |
| C(12)  | 8381(6)   | 8528(5)   | 1893(4)  | 54(1)  |
| C(16)  | 4342(5)   | 7427(5)   | 541(4)   | 59(1)  |
| C(11)  | 9642(7)   | 8878(6)   | 2306(4)  | 66(2)  |
| C(2)   | 5286(5)   | -1263(5)  | 7169(4)  | 54(1)  |
| C(9)   | 9924(7)   | 6253(6)   | 3463(4)  | 63(1)  |
| C(3)   | 5834(8)   | -2661(5)  | 7079(5)  | 76(2)  |
| C(10)  | 10407(8)  | 7716(8)   | 3100(4)  | 79(2)  |
| C(5)   | 7282(9)   | -1485(6)  | 5504(4)  | 81(2)  |
| C(4)   | 6781(11)  | -2763(6)  | 6257(6)  | 100(3) |
| C(19)  | 11570(40) | 10610(40) | 1180(40) | 64(8)  |
| C(20)  | 10171(8)  | 10484(6)  | 1897     | 107(3) |
| C(21)  | 9300(40)  | 11550(20) | 2230(30) | 89(9)  |
| O(2')  | 4077(7)   | 5848(7)   | 821(7)   | 39(3)  |
| O(2)   | 3685(8)   | 6294(8)   | 1320(7)  | 36(3)  |
| C(1A)  | 11110(50) | 10730(40) | 1010(40) | 60(9)  |
| C(22)  | 9920(30)  | 11350(30) | 2559(16) | 55(5)  |
| C(17)  | 2225(9)   | 5942(11)  | 952(7)   | 51(2)  |
| C(17') | 2714(15)  | 5364(18)  | 402(12)  | 38(3)  |
| C(18)  | 2650(30)  | 5200(30)  | 129(14)  | 82(8)  |

C(18')

1267(10)

5744(11)

985(7)

46(2)

---

**Table S20.** Bond lengths [Å] and angles [°] for **6e**.

---

|               |            |
|---------------|------------|
| S(2)-C(006)   | 1.742(4)   |
| S(2)-C(7)     | 1.818(4)   |
| S(1)-C(006)   | 1.761(4)   |
| S(1)-C(1)     | 1.736(4)   |
| O(1)-C(16)    | 1.198(6)   |
| N(1)-C(006)   | 1.283(5)   |
| N(1)-C(6)     | 1.405(5)   |
| C(15)-C(14)   | 1.317(6)   |
| C(15)-C(16)   | 1.462(7)   |
| C(13)-C(8)    | 1.405(6)   |
| C(13)-C(14)   | 1.464(7)   |
| C(13)-C(12)   | 1.400(6)   |
| C(6)-C(1)     | 1.371(6)   |
| C(6)-C(5)     | 1.372(7)   |
| C(1)-C(2)     | 1.397(6)   |
| C(7)-C(8)     | 1.505(5)   |
| C(8)-C(9)     | 1.388(7)   |
| C(12)-C(11)   | 1.380(8)   |
| C(16)-O(2')   | 1.431(8)   |
| C(16)-O(2)    | 1.360(7)   |
| C(11)-C(10)   | 1.384(9)   |
| C(11)-C(20)   | 1.522(6)   |
| C(2)-C(3)     | 1.374(8)   |
| C(9)-C(10)    | 1.387(7)   |
| C(3)-C(4)     | 1.355(10)  |
| C(5)-C(4)     | 1.372(9)   |
| C(19)-C(20)   | 1.48(4)    |
| C(20)-C(21)   | 1.35(2)    |
| C(20)-C(1A)   | 1.37(5)    |
| C(20)-C(22)   | 1.39(2)    |
| O(2')-C(17')  | 1.52(2)    |
| O(2)-C(17)    | 1.4996(10) |
| C(17)-C(18)   | 1.4999(10) |
| C(17')-C(18') | 1.5000(10) |

|                   |            |
|-------------------|------------|
| C(006)-S(2)-C(7)  | 101.16(18) |
| C(1)-S(1)-C(006)  | 87.4(2)    |
| C(006)-N(1)-C(6)  | 108.6(4)   |
| C(14)-C(15)-C(16) | 126.3(4)   |
| S(2)-C(006)-S(1)  | 116.9(2)   |
| N(1)-C(006)-S(2)  | 125.4(3)   |
| N(1)-C(006)-S(1)  | 117.6(3)   |
| C(8)-C(13)-C(14)  | 121.3(4)   |
| C(12)-C(13)-C(8)  | 118.1(4)   |
| C(12)-C(13)-C(14) | 120.6(4)   |
| C(1)-C(6)-N(1)    | 116.1(4)   |
| C(1)-C(6)-C(5)    | 118.2(4)   |
| C(5)-C(6)-N(1)    | 125.6(5)   |
| C(6)-C(1)-S(1)    | 110.2(3)   |
| C(6)-C(1)-C(2)    | 123.3(4)   |
| C(2)-C(1)-S(1)    | 126.5(4)   |
| C(8)-C(7)-S(2)    | 106.2(3)   |
| C(13)-C(8)-C(7)   | 123.1(4)   |
| C(9)-C(8)-C(13)   | 119.0(4)   |
| C(9)-C(8)-C(7)    | 117.9(4)   |
| C(15)-C(14)-C(13) | 126.9(4)   |
| C(11)-C(12)-C(13) | 123.2(5)   |
| O(1)-C(16)-C(15)  | 124.7(4)   |
| O(1)-C(16)-O(2')  | 116.4(5)   |
| O(1)-C(16)-O(2)   | 125.7(5)   |
| O(2')-C(16)-C(15) | 116.1(4)   |
| O(2)-C(16)-C(15)  | 105.9(5)   |
| C(12)-C(11)-C(10) | 117.5(4)   |
| C(12)-C(11)-C(20) | 121.0(5)   |
| C(10)-C(11)-C(20) | 121.5(5)   |
| C(3)-C(2)-C(1)    | 116.2(5)   |
| C(10)-C(9)-C(8)   | 121.1(5)   |
| C(4)-C(3)-C(2)    | 121.1(5)   |
| C(11)-C(10)-C(9)  | 121.1(5)   |
| C(4)-C(5)-C(6)    | 119.4(6)   |



|                     |           |
|---------------------|-----------|
| C(3)-C(4)-C(5)      | 121.7(5)  |
| C(19)-C(20)-C(11)   | 113.4(15) |
| C(21)-C(20)-C(11)   | 115.9(9)  |
| C(21)-C(20)-C(19)   | 130.7(17) |
| C(1A)-C(20)-C(11)   | 112.9(14) |
| C(1A)-C(20)-C(22)   | 128.6(16) |
| C(22)-C(20)-C(11)   | 117.0(10) |
| C(16)-O(2')-C(17')  | 121.5(7)  |
| C(16)-O(2)-C(17)    | 110.0(6)  |
| O(2)-C(17)-C(18)    | 109.2(13) |
| C(18')-C(17')-O(2') | 107.1(11) |

---

Symmetry transformations used to generate equivalent atoms:

**Table S21.** Anisotropic displacement parameters ( $\text{\AA}^2 \times 10^3$ ) for **6e**. The anisotropic displacement factor exponent takes the form:  $-2h^2 [h^2 a^{*2} U^{11} + \dots + 2hk a^* b^* U^{12}]$

|        | U11    | U22    | U33     | U23     | U13    | U12     |
|--------|--------|--------|---------|---------|--------|---------|
| S(2)   | 73(1)  | 26(1)  | 54(1)   | -8(1)   | 36(1)  | -9(1)   |
| S(1)   | 75(1)  | 32(1)  | 76(1)   | 3(1)    | 42(1)  | -1(1)   |
| O(1)   | 65(2)  | 37(2)  | 51(2)   | 6(1)    | 4(2)   | -1(2)   |
| N(1)   | 51(2)  | 38(2)  | 33(2)   | 3(2)    | -12(2) | -6(2)   |
| C(15)  | 51(3)  | 25(2)  | 48(2)   | 2(2)    | 18(2)  | -3(2)   |
| C(006) | 41(2)  | 25(2)  | 43(2)   | -10(2)  | 12(2)  | 0(2)    |
| C(13)  | 45(2)  | 31(2)  | 45(2)   | -12(2)  | 23(2)  | -7(2)   |
| C(6)   | 60(3)  | 35(2)  | 38(2)   | -6(2)   | -20(2) | 0(2)    |
| C(1)   | 42(2)  | 31(2)  | 50(2)   | 1(2)    | -12(2) | -4(2)   |
| C(7)   | 42(2)  | 37(2)  | 35(2)   | -9(2)   | 12(2)  | -4(2)   |
| C(8)   | 50(2)  | 39(2)  | 33(2)   | -13(2)  | 19(2)  | -13(2)  |
| C(14)  | 42(2)  | 26(2)  | 65(3)   | 4(2)    | 12(2)  | -4(2)   |
| C(12)  | 66(3)  | 31(2)  | 58(3)   | -13(2)  | 37(2)  | -11(2)  |
| C(16)  | 42(3)  | 35(2)  | 72(3)   | 14(2)   | 9(2)   | 1(2)    |
| C(11)  | 95(4)  | 58(3)  | 57(3)   | -32(3)  | 47(3)  | -45(3)  |
| C(2)   | 48(3)  | 40(3)  | 58(3)   | 12(2)   | -15(2) | -12(2)  |
| C(9)   | 79(4)  | 74(3)  | 36(2)   | -12(2)  | 9(2)   | -38(3)  |
| C(3)   | 113(5) | 30(3)  | 70(4)   | 15(2)   | -46(4) | -23(3)  |
| C(10)  | 106(5) | 98(5)  | 47(3)   | -30(3)  | 23(3)  | -69(4)  |
| C(5)   | 138(6) | 45(3)  | 53(3)   | -15(2)  | -3(3)  | 13(3)   |
| C(4)   | 179(8) | 31(3)  | 87(5)   | -22(3)  | -25(5) | 15(4)   |
| C(19)  | 64(15) | 68(11) | 70(14)  | -34(8)  | 33(10) | -35(9)  |
| C(20)  | 146(6) | 68(4)  | 130(6)  | -63(4)  | 100(5) | -73(4)  |
| C(21)  | 91(15) | 42(8)  | 140(20) | -47(12) | 58(14) | -30(10) |
| O(2')  | 41(3)  | 27(3)  | 44(4)   | -6(3)   | 5(3)   | -5(2)   |
| O(2)   | 38(4)  | 28(3)  | 36(4)   | -5(3)   | 7(3)   | -4(3)   |
| C(1A)  | 80(20) | 36(9)  | 72(16)  | -33(9)  | 45(15) | -40(11) |
| C(22)  | 57(11) | 66(9)  | 56(8)   | -37(7)  | 26(7)  | -21(8)  |
| C(17)  | 42(6)  | 48(5)  | 46(6)   | 1(5)    | 11(5)  | -1(5)   |
| C(17') | 42(6)  | 35(6)  | 29(6)   | -4(5)   | 17(5)  | -4(5)   |
| C(18)  | 84(12) | 79(12) | 86(16)  | -36(10) | 13(9)  | -6(9)   |

C(18') 33(5) 56(6) 51(5) -19(4) 5(4) -7(4)

---

**Table S22.** Hydrogen coordinates ( $\times 10^4$ ) and isotropic displacement parameters ( $\text{\AA}^2 \times 10^3$ ) for **6e**.

|        | x     | y     | z    | U(eq) |
|--------|-------|-------|------|-------|
| H(15)  | 6044  | 8730  | 683  | 56    |
| H(7A)  | 9070  | 3570  | 3805 | 48    |
| H(7B)  | 7715  | 4005  | 2970 | 48    |
| H(14)  | 6150  | 5782  | 2082 | 60    |
| H(12)  | 7843  | 9315  | 1350 | 65    |
| H(2)   | 4600  | -1177 | 7731 | 65    |
| H(9)   | 10471 | 5475  | 4008 | 75    |
| H(3)   | 5544  | -3572 | 7601 | 91    |
| H(10)  | 11276 | 7924  | 3402 | 94    |
| H(5)   | 7954  | -1583 | 4938 | 97    |
| H(4)   | 7106  | -3744 | 6201 | 120   |
| H(19A) | 12480 | 10041 | 1583 | 96    |
| H(19B) | 11755 | 11694 | 862  | 96    |
| H(19C) | 11406 | 10189 | 634  | 96    |
| H(20)  | 10852 | 10222 | 2510 | 129   |
| H(20A) | 9201  | 10953 | 1502 | 129   |
| H(21A) | 8315  | 11838 | 1865 | 133   |
| H(21B) | 9873  | 12450 | 2073 | 133   |
| H(21C) | 9091  | 11119 | 2985 | 133   |
| H(1AA) | 11944 | 9881  | 1118 | 90    |
| H(1AB) | 11578 | 11693 | 858  | 90    |
| H(1AC) | 10494 | 10784 | 418  | 90    |
| H(22A) | 8889  | 11208 | 2911 | 83    |
| H(22B) | 9969  | 12438 | 2149 | 83    |
| H(22C) | 10725 | 11023 | 3085 | 83    |
| H(17A) | 1532  | 6899  | 657  | 61    |
| H(17B) | 1660  | 5243  | 1550 | 61    |
| H(17C) | 2628  | 5920  | -360 | 46    |
| H(17D) | 2865  | 4250  | 515  | 46    |
| H(18A) | 3223  | 5892  | -455 | 123   |

|        |      |      |      |     |
|--------|------|------|------|-----|
| H(18B) | 1694 | 4996 | -127 | 123 |
| H(18C) | 3302 | 4237 | 432  | 123 |
| H(18D) | 371  | 5380 | 771  | 70  |
| H(18E) | 1089 | 6857 | 826  | 70  |
| H(18F) | 1397 | 5244 | 1741 | 70  |

---

Experimental Summary for Crystal **6g** (CCDC 1905650)

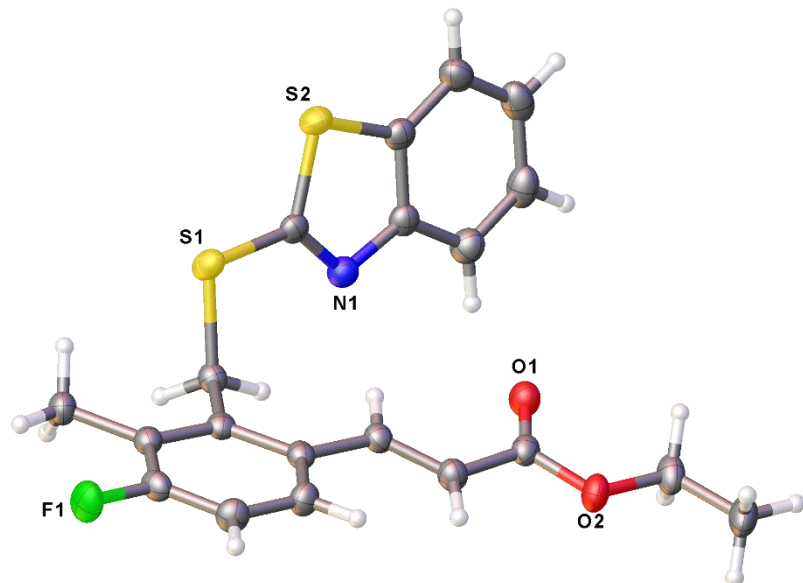

**Table S23.** Crystal data and structure refinement for **6g**.

|                                   |                                                                   |                 |
|-----------------------------------|-------------------------------------------------------------------|-----------------|
| Empirical formula                 | C <sub>20</sub> H <sub>18</sub> F N O <sub>2</sub> S <sub>2</sub> |                 |
| Formula weight                    | 387.47                                                            |                 |
| Temperature                       | 200 K                                                             |                 |
| Wavelength                        | 1.54178 Å                                                         |                 |
| Crystal system                    | Triclinic                                                         |                 |
| Space group                       | P-1                                                               |                 |
| Unit cell dimensions              | a = 7.0055(2) Å                                                   | ∠ = 79.220(2)°. |
|                                   | b = 10.2801(3) Å                                                  | ∠ = 84.888(2)°. |
|                                   | c = 13.1310(3) Å                                                  | ∠ = 80.238(2)°. |
| Volume                            | 913.91(4) Å <sup>3</sup>                                          |                 |
| Z                                 | 2                                                                 |                 |
| Density (calculated)              | 1.408 Mg/m <sup>3</sup>                                           |                 |
| Absorption coefficient            | 2.851 mm <sup>-1</sup>                                            |                 |
| F(000)                            | 404                                                               |                 |
| Crystal size                      | 0.29 x 0.28 x 0.27 mm <sup>3</sup>                                |                 |
| Theta range for data collection   | 4.433 to 68.311°.                                                 |                 |
| Index ranges                      | -8 ≤ h ≤ 8, -12 ≤ k ≤ 10, -15 ≤ l ≤ 15                            |                 |
| Reflections collected             | 8744                                                              |                 |
| Independent reflections           | 3247 [R(int) = 0.0260]                                            |                 |
| Completeness to theta = 67.679°   | 97.0 %                                                            |                 |
| Absorption correction             | Semi-empirical from equivalents                                   |                 |
| Max. and min. transmission        | 0.7531 and 0.6344                                                 |                 |
| Refinement method                 | Full-matrix least-squares on F <sup>2</sup>                       |                 |
| Data / restraints / parameters    | 3247 / 0 / 237                                                    |                 |
| Goodness-of-fit on F <sup>2</sup> | 1.043                                                             |                 |
| Final R indices [I > 2σ(I)]       | R1 = 0.0371, wR2 = 0.0969                                         |                 |
| R indices (all data)              | R1 = 0.0410, wR2 = 0.1009                                         |                 |
| Extinction coefficient            | n/a                                                               |                 |
| Largest diff. peak and hole       | 0.365 and -0.381 e.Å <sup>-3</sup>                                |                 |

**Table S24.** Atomic coordinates ( $\times 10^4$ ) and equivalent isotropic displacement parameters ( $\text{\AA}^2 \times 10^3$ ) for **6g**.  $U(\text{eq})$  is defined as one third of the trace of the orthogonalized  $U^{ij}$  tensor.

|       | x        | y       | z       | U(eq) |
|-------|----------|---------|---------|-------|
| S(1)  | 9930(1)  | 1628(1) | 8803(1) | 38(1) |
| S(2)  | 6869(1)  | -83(1)  | 9097(1) | 38(1) |
| F(1)  | 13101(2) | 5996(1) | 9478(1) | 48(1) |
| O(2)  | 2987(2)  | 6510(1) | 5949(1) | 39(1) |
| O(1)  | 4237(2)  | 4321(1) | 6196(1) | 40(1) |
| N(1)  | 7549(2)  | 1433(2) | 7326(1) | 33(1) |
| C(7)  | 8105(3)  | 1076(2) | 8262(1) | 30(1) |
| C(16) | 7226(2)  | 4959(2) | 7276(1) | 29(1) |
| C(9)  | 10443(2) | 4233(2) | 8084(1) | 26(1) |
| C(1)  | 6035(3)  | 767(2)  | 7200(2) | 32(1) |
| C(14) | 11916(2) | 4481(2) | 8647(1) | 29(1) |
| C(6)  | 5458(3)  | -110(2) | 8080(2) | 34(1) |
| C(17) | 5813(3)  | 5862(2) | 6836(2) | 34(1) |
| C(8)  | 10682(2) | 2896(2) | 7738(1) | 31(1) |
| C(10) | 8797(2)  | 5216(2) | 7847(1) | 28(1) |
| C(15) | 13656(3) | 3445(2) | 8954(2) | 37(1) |
| C(2)  | 5093(3)  | 912(2)  | 6283(2) | 42(1) |
| C(11) | 8677(3)  | 6442(2) | 8181(2) | 34(1) |
| C(12) | 10123(3) | 6708(2) | 8723(2) | 37(1) |
| C(3)  | 3635(3)  | 160(2)  | 6273(2) | 47(1) |
| C(18) | 4309(2)  | 5446(2) | 6303(1) | 32(1) |
| C(13) | 11696(3) | 5723(2) | 8939(1) | 33(1) |
| C(20) | -36(3)   | 7468(3) | 5224(2) | 55(1) |
| C(5)  | 3981(3)  | -854(2) | 8066(2) | 43(1) |
| C(19) | 1446(3)  | 6225(2) | 5398(2) | 43(1) |
| C(4)  | 3089(3)  | -707(2) | 7152(2) | 48(1) |

**Table S25.** Bond lengths [Å] and angles [°] for **6g**.

---

|              |            |
|--------------|------------|
| S(1)-C(7)    | 1.7375(18) |
| S(1)-C(8)    | 1.8307(19) |
| S(2)-C(7)    | 1.7505(19) |
| S(2)-C(6)    | 1.738(2)   |
| F(1)-C(13)   | 1.357(2)   |
| O(2)-C(18)   | 1.346(2)   |
| O(2)-C(19)   | 1.449(2)   |
| O(1)-C(18)   | 1.201(2)   |
| N(1)-C(7)    | 1.290(2)   |
| N(1)-C(1)    | 1.393(2)   |
| C(16)-H(16)  | 0.9500     |
| C(16)-C(17)  | 1.329(3)   |
| C(16)-C(10)  | 1.471(2)   |
| C(9)-C(14)   | 1.404(2)   |
| C(9)-C(8)    | 1.506(2)   |
| C(9)-C(10)   | 1.414(2)   |
| C(1)-C(6)    | 1.401(3)   |
| C(1)-C(2)    | 1.396(3)   |
| C(14)-C(15)  | 1.507(2)   |
| C(14)-C(13)  | 1.380(3)   |
| C(6)-C(5)    | 1.391(3)   |
| C(17)-H(17)  | 0.9500     |
| C(17)-C(18)  | 1.476(2)   |
| C(8)-H(8A)   | 0.9900     |
| C(8)-H(8B)   | 0.9900     |
| C(10)-C(11)  | 1.397(3)   |
| C(15)-H(15A) | 0.9800     |
| C(15)-H(15B) | 0.9800     |
| C(15)-H(15C) | 0.9800     |
| C(2)-H(2)    | 0.9500     |
| C(2)-C(3)    | 1.384(3)   |
| C(11)-H(11)  | 0.9500     |
| C(11)-C(12)  | 1.379(3)   |
| C(12)-H(12)  | 0.9500     |



|                   |            |
|-------------------|------------|
| C(12)-C(13)       | 1.375(3)   |
| C(3)-H(3)         | 0.9500     |
| C(3)-C(4)         | 1.388(3)   |
| C(20)-H(20A)      | 0.9800     |
| C(20)-H(20B)      | 0.9800     |
| C(20)-H(20C)      | 0.9800     |
| C(20)-C(19)       | 1.498(3)   |
| C(5)-H(5)         | 0.9500     |
| C(5)-C(4)         | 1.374(3)   |
| C(19)-H(19A)      | 0.9900     |
| C(19)-H(19B)      | 0.9900     |
| C(4)-H(4)         | 0.9500     |
|                   |            |
| C(7)-S(1)-C(8)    | 101.81(8)  |
| C(6)-S(2)-C(7)    | 88.63(9)   |
| C(18)-O(2)-C(19)  | 115.66(15) |
| C(7)-N(1)-C(1)    | 109.96(16) |
| S(1)-C(7)-S(2)    | 115.69(10) |
| N(1)-C(7)-S(1)    | 127.58(14) |
| N(1)-C(7)-S(2)    | 116.72(14) |
| C(17)-C(16)-H(16) | 116.6      |
| C(17)-C(16)-C(10) | 126.76(17) |
| C(10)-C(16)-H(16) | 116.6      |
| C(14)-C(9)-C(8)   | 117.91(15) |
| C(14)-C(9)-C(10)  | 120.72(16) |
| C(10)-C(9)-C(8)   | 121.36(15) |
| N(1)-C(1)-C(6)    | 115.48(16) |
| N(1)-C(1)-C(2)    | 125.15(18) |
| C(2)-C(1)-C(6)    | 119.37(18) |
| C(9)-C(14)-C(15)  | 122.57(16) |
| C(13)-C(14)-C(9)  | 117.20(16) |
| C(13)-C(14)-C(15) | 120.22(16) |
| C(1)-C(6)-S(2)    | 109.20(14) |
| C(5)-C(6)-S(2)    | 128.88(17) |
| C(5)-C(6)-C(1)    | 121.92(19) |
| C(16)-C(17)-H(17) | 119.7      |

|                     |            |
|---------------------|------------|
| C(16)-C(17)-C(18)   | 120.59(17) |
| C(18)-C(17)-H(17)   | 119.7      |
| S(1)-C(8)-H(8A)     | 109.6      |
| S(1)-C(8)-H(8B)     | 109.6      |
| C(9)-C(8)-S(1)      | 110.07(12) |
| C(9)-C(8)-H(8A)     | 109.6      |
| C(9)-C(8)-H(8B)     | 109.6      |
| H(8A)-C(8)-H(8B)    | 108.2      |
| C(9)-C(10)-C(16)    | 121.23(16) |
| C(11)-C(10)-C(16)   | 120.31(16) |
| C(11)-C(10)-C(9)    | 118.45(16) |
| C(14)-C(15)-H(15A)  | 109.5      |
| C(14)-C(15)-H(15B)  | 109.5      |
| C(14)-C(15)-H(15C)  | 109.5      |
| H(15A)-C(15)-H(15B) | 109.5      |
| H(15A)-C(15)-H(15C) | 109.5      |
| H(15B)-C(15)-H(15C) | 109.5      |
| C(1)-C(2)-H(2)      | 120.8      |
| C(3)-C(2)-C(1)      | 118.4(2)   |
| C(3)-C(2)-H(2)      | 120.8      |
| C(10)-C(11)-H(11)   | 119.2      |
| C(12)-C(11)-C(10)   | 121.51(17) |
| C(12)-C(11)-H(11)   | 119.2      |
| C(11)-C(12)-H(12)   | 120.9      |
| C(13)-C(12)-C(11)   | 118.15(17) |
| C(13)-C(12)-H(12)   | 120.9      |
| C(2)-C(3)-H(3)      | 119.3      |
| C(2)-C(3)-C(4)      | 121.4(2)   |
| C(4)-C(3)-H(3)      | 119.3      |
| O(2)-C(18)-C(17)    | 110.68(16) |
| O(1)-C(18)-O(2)     | 123.58(16) |
| O(1)-C(18)-C(17)    | 125.73(16) |
| F(1)-C(13)-C(14)    | 118.59(16) |
| F(1)-C(13)-C(12)    | 117.45(16) |
| C(12)-C(13)-C(14)   | 123.96(16) |
| H(20A)-C(20)-H(20B) | 109.5      |

|                     |            |
|---------------------|------------|
| H(20A)-C(20)-H(20C) | 109.5      |
| H(20B)-C(20)-H(20C) | 109.5      |
| C(19)-C(20)-H(20A)  | 109.5      |
| C(19)-C(20)-H(20B)  | 109.5      |
| C(19)-C(20)-H(20C)  | 109.5      |
| C(6)-C(5)-H(5)      | 121.1      |
| C(4)-C(5)-C(6)      | 117.7(2)   |
| C(4)-C(5)-H(5)      | 121.1      |
| O(2)-C(19)-C(20)    | 107.67(18) |
| O(2)-C(19)-H(19A)   | 110.2      |
| O(2)-C(19)-H(19B)   | 110.2      |
| C(20)-C(19)-H(19A)  | 110.2      |
| C(20)-C(19)-H(19B)  | 110.2      |
| H(19A)-C(19)-H(19B) | 108.5      |
| C(3)-C(4)-H(4)      | 119.4      |
| C(5)-C(4)-C(3)      | 121.22(19) |
| C(5)-C(4)-H(4)      | 119.4      |

---

Symmetry transformations used to generate equivalent atoms:

**Table S26.** Anisotropic displacement parameters ( $\text{\AA}^2 \times 10^3$ ) for **6g**. The anisotropic displacement factor exponent takes the form:  $-2h^2 [h^2 a^{*2} U^{11} + \dots + 2hk a^* b^* U^{12}]$

|       | U11   | U22   | U33   | U23    | U13    | U12    |
|-------|-------|-------|-------|--------|--------|--------|
| S(1)  | 45(1) | 35(1) | 37(1) | -1(1)  | -17(1) | -11(1) |
| S(2)  | 41(1) | 35(1) | 37(1) | 2(1)   | -8(1)  | -9(1)  |
| F(1)  | 47(1) | 49(1) | 56(1) | -15(1) | -24(1) | -13(1) |
| O(2)  | 32(1) | 45(1) | 40(1) | -8(1)  | -14(1) | 0(1)   |
| O(1)  | 35(1) | 41(1) | 44(1) | -9(1)  | -10(1) | -7(1)  |
| N(1)  | 35(1) | 34(1) | 32(1) | -7(1)  | -6(1)  | -7(1)  |
| C(7)  | 31(1) | 25(1) | 33(1) | -7(1)  | -4(1)  | 0(1)   |
| C(16) | 26(1) | 35(1) | 28(1) | -7(1)  | 0(1)   | -7(1)  |
| C(9)  | 24(1) | 32(1) | 23(1) | -4(1)  | 1(1)   | -7(1)  |
| C(1)  | 32(1) | 28(1) | 38(1) | -10(1) | -6(1)  | -2(1)  |
| C(14) | 26(1) | 35(1) | 26(1) | -3(1)  | -3(1)  | -8(1)  |
| C(6)  | 32(1) | 27(1) | 43(1) | -8(1)  | -6(1)  | 0(1)   |
| C(17) | 31(1) | 35(1) | 39(1) | -8(1)  | -6(1)  | -6(1)  |
| C(8)  | 27(1) | 35(1) | 32(1) | -10(1) | -2(1)  | -5(1)  |
| C(10) | 26(1) | 35(1) | 23(1) | -4(1)  | -1(1)  | -7(1)  |
| C(15) | 29(1) | 40(1) | 43(1) | -3(1)  | -9(1)  | -6(1)  |
| C(2)  | 45(1) | 43(1) | 41(1) | -9(1)  | -12(1) | -7(1)  |
| C(11) | 32(1) | 34(1) | 37(1) | -9(1)  | -6(1)  | -1(1)  |
| C(12) | 42(1) | 34(1) | 39(1) | -13(1) | -6(1)  | -7(1)  |
| C(3)  | 44(1) | 46(1) | 56(1) | -20(1) | -18(1) | -2(1)  |
| C(18) | 26(1) | 40(1) | 28(1) | -5(1)  | -1(1)  | -3(1)  |
| C(13) | 32(1) | 42(1) | 30(1) | -8(1)  | -7(1)  | -14(1) |
| C(20) | 34(1) | 75(2) | 49(1) | 2(1)   | -11(1) | 1(1)   |
| C(5)  | 39(1) | 35(1) | 58(1) | -6(1)  | -5(1)  | -11(1) |
| C(19) | 30(1) | 65(1) | 34(1) | -12(1) | -10(1) | -4(1)  |
| C(4)  | 37(1) | 41(1) | 72(2) | -20(1) | -10(1) | -10(1) |

**Table S27.** Hydrogen coordinates ( $\times 10^4$ ) and isotropic displacement parameters ( $\text{\AA}^2 \times 10^3$ ) for **6g**.

|        | x     | y     | z    | U(eq) |
|--------|-------|-------|------|-------|
| H(16)  | 7221  | 4053  | 7217 | 35    |
| H(17)  | 5771  | 6783  | 6864 | 41    |
| H(8A)  | 12056 | 2624  | 7514 | 37    |
| H(8B)  | 9884  | 2968  | 7138 | 37    |
| H(15A) | 13227 | 2664  | 9407 | 56    |
| H(15B) | 14519 | 3827  | 9323 | 56    |
| H(15C) | 14354 | 3168  | 8329 | 56    |
| H(2)   | 5444  | 1513  | 5680 | 50    |
| H(11)  | 7574  | 7109  | 8031 | 41    |
| H(12)  | 10035 | 7548  | 8941 | 45    |
| H(3)   | 2995  | 239   | 5651 | 56    |
| H(20A) | 558   | 8196  | 4792 | 82    |
| H(20B) | -515  | 7724  | 5894 | 82    |
| H(20C) | -1120 | 7295  | 4872 | 82    |
| H(5)   | 3601  | -1445 | 8669 | 52    |
| H(19A) | 850   | 5473  | 5812 | 51    |
| H(19B) | 1969  | 5972  | 4724 | 51    |
| H(4)   | 2080  | -1208 | 7122 | 58    |

Experimental Summary for Crystal **6j''** (CCDC 1905652)

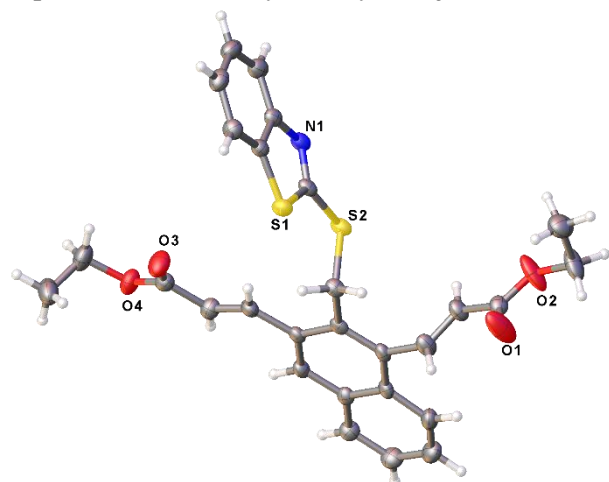

**Table S28.** Crystal data and structure refinement for **6j''**.

|                                   |                                                                 |                  |
|-----------------------------------|-----------------------------------------------------------------|------------------|
| Empirical formula                 | C <sub>28</sub> H <sub>25</sub> N O <sub>4</sub> S <sub>2</sub> |                  |
| Formula weight                    | 503.61                                                          |                  |
| Temperature                       | 200 K                                                           |                  |
| Wavelength                        | 1.54178 Å                                                       |                  |
| Crystal system                    | Triclinic                                                       |                  |
| Space group                       | P-1                                                             |                  |
| Unit cell dimensions              | a = 8.4844(7) Å                                                 | α = 112.337(6)°. |
|                                   | b = 12.3314(9) Å                                                | β = 94.171(5)°.  |
|                                   | c = 12.7997(11) Å                                               | γ = 98.558(6)°.  |
| Volume                            | 1212.59(18) Å <sup>3</sup>                                      |                  |
| Z                                 | 2                                                               |                  |
| Density (calculated)              | 1.379 Mg/m <sup>3</sup>                                         |                  |
| Absorption coefficient            | 2.286 mm <sup>-1</sup>                                          |                  |
| F(000)                            | 528                                                             |                  |
| Crystal size                      | 0.3 x 0.29 x 0.28 mm <sup>3</sup>                               |                  |
| Theta range for data collection   | 3.771 to 68.433°.                                               |                  |
| Index ranges                      | -10 ≤ h ≤ 10, -14 ≤ k ≤ 14, -15 ≤ l ≤ 15                        |                  |
| Reflections collected             | 13527                                                           |                  |
| Independent reflections           | 4305 [R(int) = 0.0410]                                          |                  |
| Completeness to theta = 67.679°   | 97.1 %                                                          |                  |
| Absorption correction             | Semi-empirical from equivalents                                 |                  |
| Max. and min. transmission        | 0.7531 and 0.5788                                               |                  |
| Refinement method                 | Full-matrix least-squares on F <sup>2</sup>                     |                  |
| Data / restraints / parameters    | 4305 / 0 / 318                                                  |                  |
| Goodness-of-fit on F <sup>2</sup> | 1.046                                                           |                  |
| Final R indices [I > 2σ(I)]       | R1 = 0.0515, wR2 = 0.1293                                       |                  |
| R indices (all data)              | R1 = 0.0597, wR2 = 0.1403                                       |                  |
| Extinction coefficient            | n/a                                                             |                  |
| Largest diff. peak and hole       | 0.622 and -0.318 e.Å <sup>-3</sup>                              |                  |

**Table S29.** Atomic coordinates ( $\times 10^4$ ) and equivalent isotropic displacement parameters ( $\text{\AA}^2 \times 10^3$ ) for **6j**". U(eq) is defined as one third of the trace of the orthogonalized  $U^{ij}$  tensor.

|       | x        | y        | z        | U(eq) |
|-------|----------|----------|----------|-------|
| S(1)  | 4488(1)  | 4185(1)  | 8096(1)  | 34(1) |
| S(2)  | 2712(1)  | 5950(1)  | 7564(1)  | 34(1) |
| O(1)  | 8143(3)  | 9354(3)  | 8027(2)  | 94(1) |
| O(4)  | -1243(2) | 1259(2)  | 3667(2)  | 51(1) |
| O(3)  | 968(3)   | 1654(2)  | 4921(2)  | 64(1) |
| O(2)  | 6412(3)  | 10350(2) | 8968(2)  | 79(1) |
| N(1)  | 1975(2)  | 4910(2)  | 8980(2)  | 33(1) |
| C(17) | 1798(3)  | 5294(2)  | 3819(2)  | 31(1) |
| C(16) | 2400(3)  | 6356(2)  | 3695(2)  | 30(1) |
| C(11) | 3668(3)  | 7197(2)  | 4506(2)  | 31(1) |
| C(9)  | 3615(3)  | 5923(2)  | 5576(2)  | 29(1) |
| C(21) | 6804(3)  | 9477(2)  | 8112(2)  | 36(1) |
| C(26) | 131(3)   | 1939(2)  | 4309(2)  | 39(1) |
| C(13) | 3693(4)  | 8431(3)  | 3423(3)  | 48(1) |
| C(6)  | 3752(3)  | 3636(2)  | 9065(2)  | 33(1) |
| C(1)  | 2398(3)  | 4117(2)  | 9441(2)  | 32(1) |
| C(24) | 1754(3)  | 3902(2)  | 4798(2)  | 34(1) |
| C(19) | 5523(3)  | 7878(2)  | 6335(2)  | 42(1) |
| C(12) | 4317(3)  | 8240(2)  | 4334(2)  | 42(1) |
| C(20) | 5404(3)  | 8661(2)  | 7306(2)  | 40(1) |
| C(8)  | 4212(3)  | 5675(2)  | 6589(2)  | 31(1) |
| C(2)  | 1589(3)  | 3775(3)  | 10213(2) | 43(1) |
| C(15) | 1770(3)  | 6597(2)  | 2760(2)  | 38(1) |
| C(3)  | 2173(4)  | 2996(3)  | 10606(2) | 49(1) |
| C(14) | 2402(3)  | 7619(3)  | 2635(2)  | 45(1) |
| C(4)  | 3531(4)  | 2533(3)  | 10236(2) | 47(1) |
| C(25) | 517(3)   | 3070(2)  | 4153(2)  | 38(1) |
| C(5)  | 4329(3)  | 2846(2)  | 9455(2)  | 41(1) |
| C(23) | 8108(4)  | 10727(3) | 10716(3) | 64(1) |
| C(27) | -1729(4) | 103(3)   | 3734(3)  | 60(1) |
| C(22) | 7728(5)  | 11175(3) | 9836(3)  | 69(1) |

|       |          |         |         |       |
|-------|----------|---------|---------|-------|
| C(28) | -1018(6) | -825(3) | 2928(3) | 71(1) |
| C(10) | 4240(3)  | 6971(2) | 5475(2) | 31(1) |
| C(7)  | 2957(3)  | 5017(2) | 8278(2) | 30(1) |
| C(18) | 2370(3)  | 5044(2) | 4720(2) | 29(1) |

---



**Table S30.** Bond lengths [Å] and angles [°] for **6j''**.

---

|             |          |
|-------------|----------|
| S(1)-C(6)   | 1.736(3) |
| S(1)-C(7)   | 1.747(2) |
| S(2)-C(8)   | 1.825(2) |
| S(2)-C(7)   | 1.745(2) |
| O(1)-C(21)  | 1.176(4) |
| O(4)-C(26)  | 1.336(3) |
| O(4)-C(27)  | 1.460(4) |
| O(3)-C(26)  | 1.201(4) |
| O(2)-C(21)  | 1.316(3) |
| O(2)-C(22)  | 1.463(4) |
| N(1)-C(1)   | 1.394(3) |
| N(1)-C(7)   | 1.299(3) |
| C(17)-H(17) | 0.9500   |
| C(17)-C(16) | 1.403(4) |
| C(17)-C(18) | 1.377(3) |
| C(16)-C(11) | 1.413(3) |
| C(16)-C(15) | 1.426(4) |
| C(11)-C(12) | 1.425(4) |
| C(11)-C(10) | 1.438(3) |
| C(9)-C(8)   | 1.511(3) |
| C(9)-C(10)  | 1.378(4) |
| C(9)-C(18)  | 1.441(3) |
| C(21)-C(20) | 1.471(3) |
| C(26)-C(25) | 1.476(4) |
| C(13)-H(13) | 0.9500   |
| C(13)-C(12) | 1.360(4) |
| C(13)-C(14) | 1.402(4) |
| C(6)-C(1)   | 1.403(3) |
| C(6)-C(5)   | 1.383(4) |
| C(1)-C(2)   | 1.398(4) |
| C(24)-H(24) | 0.9500   |
| C(24)-C(25) | 1.321(4) |
| C(24)-C(18) | 1.470(4) |
| C(19)-H(19) | 0.9500   |

|                   |            |
|-------------------|------------|
| C(19)-C(20)       | 1.274(4)   |
| C(19)-C(10)       | 1.475(3)   |
| C(12)-H(12)       | 0.9500     |
| C(20)-H(20)       | 0.9500     |
| C(8)-H(8A)        | 0.9900     |
| C(8)-H(8B)        | 0.9900     |
| C(2)-H(2)         | 0.9500     |
| C(2)-C(3)         | 1.376(4)   |
| C(15)-H(15)       | 0.9500     |
| C(15)-C(14)       | 1.366(4)   |
| C(3)-H(3)         | 0.9500     |
| C(3)-C(4)         | 1.395(4)   |
| C(14)-H(14)       | 0.9500     |
| C(4)-H(4)         | 0.9500     |
| C(4)-C(5)         | 1.386(4)   |
| C(25)-H(25)       | 0.9500     |
| C(5)-H(5)         | 0.9500     |
| C(23)-H(23A)      | 0.9800     |
| C(23)-H(23B)      | 0.9800     |
| C(23)-H(23C)      | 0.9800     |
| C(23)-C(22)       | 1.467(5)   |
| C(27)-H(27A)      | 0.9900     |
| C(27)-H(27B)      | 0.9900     |
| C(27)-C(28)       | 1.462(5)   |
| C(22)-H(22A)      | 0.9900     |
| C(22)-H(22B)      | 0.9900     |
| C(28)-H(28A)      | 0.9800     |
| C(28)-H(28B)      | 0.9800     |
| C(28)-H(28C)      | 0.9800     |
| C(6)-S(1)-C(7)    | 88.59(11)  |
| C(7)-S(2)-C(8)    | 103.64(11) |
| C(26)-O(4)-C(27)  | 116.5(2)   |
| C(21)-O(2)-C(22)  | 116.9(3)   |
| C(7)-N(1)-C(1)    | 110.1(2)   |
| C(16)-C(17)-H(17) | 118.7      |

|                   |            |
|-------------------|------------|
| C(18)-C(17)-H(17) | 118.7      |
| C(18)-C(17)-C(16) | 122.6(2)   |
| C(17)-C(16)-C(11) | 119.4(2)   |
| C(17)-C(16)-C(15) | 121.3(2)   |
| C(11)-C(16)-C(15) | 119.3(2)   |
| C(16)-C(11)-C(12) | 118.6(2)   |
| C(16)-C(11)-C(10) | 118.7(2)   |
| C(12)-C(11)-C(10) | 122.7(2)   |
| C(10)-C(9)-C(8)   | 120.7(2)   |
| C(10)-C(9)-C(18)  | 120.7(2)   |
| C(18)-C(9)-C(8)   | 118.6(2)   |
| O(1)-C(21)-O(2)   | 122.6(3)   |
| O(1)-C(21)-C(20)  | 124.0(2)   |
| O(2)-C(21)-C(20)  | 113.3(2)   |
| O(4)-C(26)-C(25)  | 111.7(2)   |
| O(3)-C(26)-O(4)   | 124.2(3)   |
| O(3)-C(26)-C(25)  | 124.1(3)   |
| C(12)-C(13)-H(13) | 119.3      |
| C(12)-C(13)-C(14) | 121.5(3)   |
| C(14)-C(13)-H(13) | 119.3      |
| C(1)-C(6)-S(1)    | 109.69(19) |
| C(5)-C(6)-S(1)    | 128.6(2)   |
| C(5)-C(6)-C(1)    | 121.7(2)   |
| N(1)-C(1)-C(6)    | 114.9(2)   |
| N(1)-C(1)-C(2)    | 125.7(2)   |
| C(2)-C(1)-C(6)    | 119.4(2)   |
| C(25)-C(24)-H(24) | 116.2      |
| C(25)-C(24)-C(18) | 127.6(2)   |
| C(18)-C(24)-H(24) | 116.2      |
| C(20)-C(19)-H(19) | 115.6      |
| C(20)-C(19)-C(10) | 128.7(2)   |
| C(10)-C(19)-H(19) | 115.6      |
| C(11)-C(12)-H(12) | 119.9      |
| C(13)-C(12)-C(11) | 120.3(2)   |
| C(13)-C(12)-H(12) | 119.9      |
| C(21)-C(20)-H(20) | 118.4      |

|                     |            |
|---------------------|------------|
| C(19)-C(20)-C(21)   | 123.1(2)   |
| C(19)-C(20)-H(20)   | 118.4      |
| S(2)-C(8)-H(8A)     | 110.2      |
| S(2)-C(8)-H(8B)     | 110.2      |
| C(9)-C(8)-S(2)      | 107.72(15) |
| C(9)-C(8)-H(8A)     | 110.2      |
| C(9)-C(8)-H(8B)     | 110.2      |
| H(8A)-C(8)-H(8B)    | 108.5      |
| C(1)-C(2)-H(2)      | 120.6      |
| C(3)-C(2)-C(1)      | 118.8(3)   |
| C(3)-C(2)-H(2)      | 120.6      |
| C(16)-C(15)-H(15)   | 119.8      |
| C(14)-C(15)-C(16)   | 120.5(2)   |
| C(14)-C(15)-H(15)   | 119.8      |
| C(2)-C(3)-H(3)      | 119.3      |
| C(2)-C(3)-C(4)      | 121.3(3)   |
| C(4)-C(3)-H(3)      | 119.3      |
| C(13)-C(14)-H(14)   | 120.1      |
| C(15)-C(14)-C(13)   | 119.9(3)   |
| C(15)-C(14)-H(14)   | 120.1      |
| C(3)-C(4)-H(4)      | 119.7      |
| C(5)-C(4)-C(3)      | 120.6(3)   |
| C(5)-C(4)-H(4)      | 119.7      |
| C(26)-C(25)-H(25)   | 119.9      |
| C(24)-C(25)-C(26)   | 120.1(2)   |
| C(24)-C(25)-H(25)   | 119.9      |
| C(6)-C(5)-C(4)      | 118.2(3)   |
| C(6)-C(5)-H(5)      | 120.9      |
| C(4)-C(5)-H(5)      | 120.9      |
| H(23A)-C(23)-H(23B) | 109.5      |
| H(23A)-C(23)-H(23C) | 109.5      |
| H(23B)-C(23)-H(23C) | 109.5      |
| C(22)-C(23)-H(23A)  | 109.5      |
| C(22)-C(23)-H(23B)  | 109.5      |
| C(22)-C(23)-H(23C)  | 109.5      |
| O(4)-C(27)-H(27A)   | 109.2      |

|                     |            |
|---------------------|------------|
| O(4)-C(27)-H(27B)   | 109.2      |
| O(4)-C(27)-C(28)    | 111.9(3)   |
| H(27A)-C(27)-H(27B) | 107.9      |
| C(28)-C(27)-H(27A)  | 109.2      |
| C(28)-C(27)-H(27B)  | 109.2      |
| O(2)-C(22)-C(23)    | 111.1(3)   |
| O(2)-C(22)-H(22A)   | 109.4      |
| O(2)-C(22)-H(22B)   | 109.4      |
| C(23)-C(22)-H(22A)  | 109.4      |
| C(23)-C(22)-H(22B)  | 109.4      |
| H(22A)-C(22)-H(22B) | 108.0      |
| C(27)-C(28)-H(28A)  | 109.5      |
| C(27)-C(28)-H(28B)  | 109.5      |
| C(27)-C(28)-H(28C)  | 109.5      |
| H(28A)-C(28)-H(28B) | 109.5      |
| H(28A)-C(28)-H(28C) | 109.5      |
| H(28B)-C(28)-H(28C) | 109.5      |
| C(11)-C(10)-C(19)   | 118.1(2)   |
| C(9)-C(10)-C(11)    | 120.3(2)   |
| C(9)-C(10)-C(19)    | 121.6(2)   |
| S(2)-C(7)-S(1)      | 123.05(13) |
| N(1)-C(7)-S(1)      | 116.66(19) |
| N(1)-C(7)-S(2)      | 120.28(18) |
| C(17)-C(18)-C(9)    | 118.2(2)   |
| C(17)-C(18)-C(24)   | 121.0(2)   |
| C(9)-C(18)-C(24)    | 120.8(2)   |

---

Symmetry transformations used to generate equivalent atoms:

**Table S31.** Anisotropic displacement parameters ( $\text{\AA}^2 \times 10^3$ ) for **6j''**. The anisotropic displacement factor exponent takes the form:  $-2h^2 [h^2 a^{*2} U^{11} + \dots + 2hk a^* b^* U^{12}]$

|       | U11   | U22    | U33   | U23    | U13    | U12   |
|-------|-------|--------|-------|--------|--------|-------|
| S(1)  | 30(1) | 40(1)  | 35(1) | 16(1)  | 9(1)   | 16(1) |
| S(2)  | 34(1) | 42(1)  | 29(1) | 13(1)  | 6(1)   | 19(1) |
| O(1)  | 37(1) | 113(2) | 69(2) | -26(2) | 0(1)   | -4(1) |
| O(4)  | 40(1) | 38(1)  | 74(1) | 24(1)  | 5(1)   | 1(1)  |
| O(3)  | 79(2) | 50(1)  | 62(1) | 33(1)  | -9(1)  | -4(1) |
| O(2)  | 73(2) | 68(2)  | 54(1) | -23(1) | -26(1) | 32(1) |
| N(1)  | 28(1) | 39(1)  | 30(1) | 9(1)   | 3(1)   | 7(1)  |
| C(17) | 25(1) | 31(1)  | 29(1) | 5(1)   | 0(1)   | 3(1)  |
| C(16) | 27(1) | 29(1)  | 33(1) | 8(1)   | 5(1)   | 8(1)  |
| C(11) | 31(1) | 26(1)  | 32(1) | 6(1)   | 7(1)   | 10(1) |
| C(9)  | 25(1) | 34(1)  | 25(1) | 6(1)   | 4(1)   | 12(1) |
| C(21) | 42(1) | 33(1)  | 32(1) | 14(1)  | -1(1)  | 5(1)  |
| C(26) | 41(1) | 36(1)  | 41(1) | 15(1)  | 12(1)  | 10(1) |
| C(13) | 56(2) | 37(1)  | 56(2) | 23(1)  | 11(1)  | 10(1) |
| C(6)  | 30(1) | 34(1)  | 30(1) | 9(1)   | 1(1)   | 4(1)  |
| C(1)  | 26(1) | 34(1)  | 30(1) | 7(1)   | -2(1)  | 2(1)  |
| C(24) | 41(1) | 32(1)  | 28(1) | 9(1)   | 6(1)   | 9(1)  |
| C(19) | 28(1) | 42(2)  | 43(1) | 2(1)   | 5(1)   | 8(1)  |
| C(12) | 42(1) | 29(1)  | 47(2) | 9(1)   | 6(1)   | 2(1)  |
| C(20) | 35(1) | 42(1)  | 35(1) | 5(1)   | 1(1)   | 10(1) |
| C(8)  | 25(1) | 39(1)  | 29(1) | 11(1)  | 4(1)   | 12(1) |
| C(2)  | 35(1) | 48(2)  | 42(1) | 15(1)  | 7(1)   | 1(1)  |
| C(15) | 34(1) | 42(1)  | 40(1) | 16(1)  | 2(1)   | 10(1) |
| C(3)  | 50(2) | 50(2)  | 44(2) | 23(1)  | 4(1)   | -6(1) |
| C(14) | 48(2) | 48(2)  | 49(2) | 28(1)  | 5(1)   | 16(1) |
| C(4)  | 53(2) | 40(2)  | 49(2) | 23(1)  | -2(1)  | 3(1)  |
| C(25) | 35(1) | 37(1)  | 45(1) | 19(1)  | 5(1)   | 9(1)  |
| C(5)  | 41(1) | 40(1)  | 44(1) | 19(1)  | 2(1)   | 9(1)  |
| C(23) | 66(2) | 68(2)  | 46(2) | 16(2)  | -3(2)  | 0(2)  |
| C(27) | 54(2) | 44(2)  | 84(2) | 29(2)  | 15(2)  | -2(1) |
| C(22) | 91(3) | 43(2)  | 49(2) | -4(1)  | -31(2) | 16(2) |

|       |        |       |       |       |      |      |
|-------|--------|-------|-------|-------|------|------|
| C(28) | 109(3) | 43(2) | 55(2) | 17(2) | 7(2) | 5(2) |
| C(10) | 26(1)  | 29(1) | 30(1) | 4(1)  | 7(1) | 8(1) |
| C(7)  | 25(1)  | 33(1) | 26(1) | 5(1)  | 0(1) | 8(1) |
| C(18) | 28(1)  | 30(1) | 26(1) | 7(1)  | 6(1) | 9(1) |

---

**Table S32.** Hydrogen coordinates ( $\times 10^4$ ) and isotropic displacement parameters ( $\text{\AA}^2 \times 10^3$ ) for 6j''.

|        | x     | y     | z     | U(eq) |
|--------|-------|-------|-------|-------|
| H(17)  | 964   | 4726  | 3259  | 37    |
| H(13)  | 4142  | 9129  | 3318  | 58    |
| H(24)  | 2311  | 3743  | 5379  | 41    |
| H(19)  | 6582  | 7878  | 6139  | 50    |
| H(12)  | 5190  | 8806  | 4858  | 50    |
| H(20)  | 4361  | 8720  | 7520  | 49    |
| H(8A)  | 5260  | 6206  | 6975  | 38    |
| H(8B)  | 4358  | 4836  | 6337  | 38    |
| H(2)   | 654   | 4076  | 10462 | 51    |
| H(15)  | 904   | 6043  | 2219  | 46    |
| H(3)   | 1640  | 2769  | 11140 | 58    |
| H(14)  | 1967  | 7779  | 2015  | 54    |
| H(4)   | 3911  | 1999  | 10522 | 56    |
| H(25)  | -126  | 3200  | 3589  | 46    |
| H(5)   | 5247  | 2527  | 9195  | 49    |
| H(23A) | 8622  | 10033 | 10394 | 96    |
| H(23B) | 7114  | 10492 | 10986 | 96    |
| H(23C) | 8843  | 11356 | 11356 | 96    |
| H(27A) | -2917 | -132  | 3571  | 72    |
| H(27B) | -1394 | 176   | 4519  | 72    |
| H(22A) | 7420  | 11964 | 10194 | 83    |
| H(22B) | 8696  | 11280 | 9470  | 83    |
| H(28A) | -1321 | -883  | 2153  | 107   |
| H(28B) | -1413 | -1593 | 2972  | 107   |
| H(28C) | 157   | -621  | 3121  | 107   |



Experimental Summary for Crystal **6u** (CCDC 1905649)

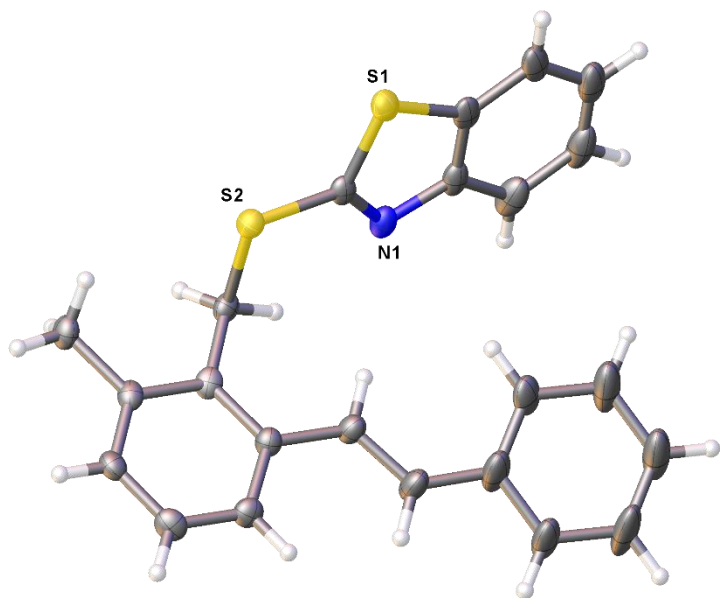

**Table S33.** Crystal data and structure refinement for **6u**.

|                                   |                                                  |                 |
|-----------------------------------|--------------------------------------------------|-----------------|
| Empirical formula                 | C <sub>23</sub> H <sub>19</sub> N S <sub>2</sub> |                 |
| Formula weight                    | 373.51                                           |                 |
| Temperature                       | 100.0 K                                          |                 |
| Wavelength                        | 1.54178 Å                                        |                 |
| Crystal system                    | Monoclinic                                       |                 |
| Space group                       | P 2 <sub>1</sub> /n                              |                 |
| Unit cell dimensions              | a = 10.584(2) Å                                  | ∠ = 90°.        |
|                                   | b = 4.3460(12) Å                                 | ∠ = 95.273(9)°. |
|                                   | c = 40.473(8) Å                                  | ∠ = 90°.        |
| Volume                            | 1853.8(7) Å <sup>3</sup>                         |                 |
| Z                                 | 4                                                |                 |
| Density (calculated)              | 1.338 Mg/m <sup>3</sup>                          |                 |
| Absorption coefficient            | 2.631 mm <sup>-1</sup>                           |                 |
| F(000)                            | 784                                              |                 |
| Crystal size                      | 0.2 x 0.16 x 0.07 mm <sup>3</sup>                |                 |
| Theta range for data collection   | 2.192 to 68.386°.                                |                 |
| Index ranges                      | -11 ≤ h ≤ 12, -5 ≤ k ≤ 5, -48 ≤ l ≤ 46           |                 |
| Reflections collected             | 7925                                             |                 |
| Independent reflections           | 3200 [R(int) = 0.0797]                           |                 |
| Completeness to theta = 67.679°   | 94.6 %                                           |                 |
| Absorption correction             | Semi-empirical from equivalents                  |                 |
| Max. and min. transmission        | 0.7531 and 0.4511                                |                 |
| Refinement method                 | Full-matrix least-squares on F <sup>2</sup>      |                 |
| Data / restraints / parameters    | 3200 / 258 / 260                                 |                 |
| Goodness-of-fit on F <sup>2</sup> | 1.046                                            |                 |
| Final R indices [I > 2σ(I)]       | R1 = 0.0996, wR2 = 0.2305                        |                 |
| R indices (all data)              | R1 = 0.1292, wR2 = 0.2467                        |                 |
| Extinction coefficient            | n/a                                              |                 |
| Largest diff. peak and hole       | 0.682 and -0.682 e.Å <sup>-3</sup>               |                 |

**Table S34.** Atomic coordinates ( $\times 10^4$ ) and equivalent isotropic displacement parameters ( $\text{\AA}^2 \times 10^3$ ) for **6u**.  $U(\text{eq})$  is defined as one third of the trace of the orthogonalized  $U^{ij}$  tensor.

|        | x        | y         | z       | $U(\text{eq})$ |
|--------|----------|-----------|---------|----------------|
| S(2)   | 7146(1)  | 5200(4)   | 7001(1) | 29(1)          |
| S(1)   | 4502(1)  | 5463(4)   | 6682(1) | 34(1)          |
| C(7)   | 6066(5)  | 4091(14)  | 6669(1) | 27(1)          |
| N(1)   | 6302(5)  | 2441(12)  | 6420(1) | 33(1)          |
| C(9)   | 9685(5)  | 5339(13)  | 6901(1) | 27(1)          |
| C(12)  | 11412(5) | 8016(15)  | 7203(1) | 31(1)          |
| C(15)  | 10029(5) | 6657(14)  | 6604(1) | 28(1)          |
| C(10)  | 10386(5) | 6088(15)  | 7203(1) | 28(1)          |
| C(11)  | 10016(6) | 4814(16)  | 7527(1) | 35(1)          |
| C(8)   | 8600(6)  | 3159(15)  | 6905(1) | 29(1)          |
| C(14)  | 11075(6) | 8640(15)  | 6615(1) | 32(1)          |
| C(16)  | 9285(6)  | 6010(15)  | 6286(1) | 33(1)          |
| C(6)   | 4117(6)  | 3584(16)  | 6306(1) | 38(1)          |
| C(13)  | 11768(6) | 9313(15)  | 6913(2) | 35(1)          |
| C(1)   | 5189(6)  | 2112(16)  | 6205(1) | 37(1)          |
| C(00G) | 9590(30) | 6880(80)  | 5974(4) | 43(6)          |
| C(5)   | 2935(7)  | 3472(18)  | 6119(2) | 47(2)          |
| C(18)  | 8825(8)  | 6400(20)  | 5667(2) | 63(4)          |
| C(25)  | 9388(9)  | 7080(40)  | 5378(2) | 63(4)          |
| C(26)  | 8714(11) | 6660(40)  | 5070(2) | 89(7)          |
| C(21)  | 7477(10) | 5550(30)  | 5051(2) | 79(5)          |
| C(22)  | 6914(8)  | 4870(30)  | 5339(3) | 79(5)          |
| C(23)  | 7588(8)  | 5290(30)  | 5647(2) | 51(4)          |
| C(2)   | 5120(8)  | 411(18)   | 5911(2) | 52(2)          |
| C(4)   | 2877(8)  | 1820(20)  | 5826(2) | 59(2)          |
| C(3)   | 3921(8)  | 390(19)   | 5727(2) | 58(2)          |
| C(17)  | 9390(40) | 7310(130) | 6028(8) | 26(6)          |
| C(24)  | 8712(14) | 6550(30)  | 5679(3) | 34(4)          |
| C(19)  | 8796(19) | 8630(30)  | 5421(4) | 44(6)          |
| C(20)  | 8130(20) | 8090(40)  | 5114(3) | 62(7)          |
| C(27)  | 7378(18) | 5480(40)  | 5065(3) | 62(7)          |

|       |          |          |         |        |
|-------|----------|----------|---------|--------|
| C(28) | 7290(20) | 3400(40) | 5323(4) | 70(10) |
| C(29) | 7960(19) | 3930(40) | 5630(3) | 34(4)  |

---

**Table S35.** Bond lengths [Å] and angles [°] for **6u**.

---

|               |           |
|---------------|-----------|
| S(2)-C(7)     | 1.750(6)  |
| S(2)-C(8)     | 1.849(6)  |
| S(1)-C(7)     | 1.764(6)  |
| S(1)-C(6)     | 1.742(7)  |
| C(7)-N(1)     | 1.283(8)  |
| N(1)-C(1)     | 1.406(7)  |
| C(9)-C(15)    | 1.409(8)  |
| C(9)-C(10)    | 1.409(7)  |
| C(9)-C(8)     | 1.490(9)  |
| C(12)-H(12)   | 0.9500    |
| C(12)-C(10)   | 1.372(9)  |
| C(12)-C(13)   | 1.384(8)  |
| C(15)-C(14)   | 1.401(8)  |
| C(15)-C(16)   | 1.472(8)  |
| C(10)-C(11)   | 1.508(8)  |
| C(11)-H(11A)  | 0.9800    |
| C(11)-H(11B)  | 0.9800    |
| C(11)-H(11C)  | 0.9800    |
| C(8)-H(8A)    | 1.04(7)   |
| C(8)-H(8B)    | 0.95(6)   |
| C(14)-H(14)   | 0.9500    |
| C(14)-C(13)   | 1.383(8)  |
| C(16)-H(16)   | 0.9500    |
| C(16)-H(00H)  | 0.9500    |
| C(16)-C(00G)  | 1.384(19) |
| C(16)-C(17)   | 1.20(4)   |
| C(6)-C(1)     | 1.396(10) |
| C(6)-C(5)     | 1.402(9)  |
| C(13)-H(13)   | 0.9500    |
| C(1)-C(2)     | 1.397(9)  |
| C(00G)-H(00G) | 0.9500    |
| C(00G)-C(18)  | 1.44(2)   |
| C(5)-H(5)     | 0.9500    |
| C(5)-C(4)     | 1.380(11) |

|                |           |
|----------------|-----------|
| C(18)-C(25)    | 1.3900    |
| C(18)-C(23)    | 1.3900    |
| C(25)-H(25)    | 0.9500    |
| C(25)-C(26)    | 1.3900    |
| C(26)-H(26)    | 0.9500    |
| C(26)-C(21)    | 1.3900    |
| C(21)-H(21)    | 0.9500    |
| C(21)-C(22)    | 1.3900    |
| C(22)-H(22)    | 0.9500    |
| C(22)-C(23)    | 1.3900    |
| C(23)-H(23)    | 0.9500    |
| C(2)-H(2)      | 0.9500    |
| C(2)-C(3)      | 1.411(11) |
| C(4)-H(4)      | 0.9500    |
| C(4)-C(3)      | 1.362(12) |
| C(3)-H(3)      | 0.9500    |
| C(17)-H(0AA)   | 0.9500    |
| C(17)-C(24)    | 1.56(4)   |
| C(24)-C(19)    | 1.3900    |
| C(24)-C(29)    | 1.3900    |
| C(19)-H(00T)   | 0.9500    |
| C(19)-C(20)    | 1.3900    |
| C(20)-H(5AA)   | 0.9500    |
| C(20)-C(27)    | 1.3900    |
| C(27)-H(4AA)   | 0.9500    |
| C(27)-C(28)    | 1.3900    |
| C(28)-H(3AA)   | 0.9500    |
| C(28)-C(29)    | 1.3900    |
| C(29)-H(2AA)   | 0.9500    |
| C(7)-S(2)-C(8) | 101.8(3)  |
| C(6)-S(1)-C(7) | 87.8(3)   |
| S(2)-C(7)-S(1) | 115.7(3)  |
| N(1)-C(7)-S(2) | 126.7(5)  |
| N(1)-C(7)-S(1) | 117.6(4)  |
| C(7)-N(1)-C(1) | 109.3(5)  |

|                     |           |
|---------------------|-----------|
| C(15)-C(9)-C(8)     | 121.9(5)  |
| C(10)-C(9)-C(15)    | 119.3(6)  |
| C(10)-C(9)-C(8)     | 118.8(5)  |
| C(10)-C(12)-H(12)   | 119.1     |
| C(10)-C(12)-C(13)   | 121.9(5)  |
| C(13)-C(12)-H(12)   | 119.1     |
| C(9)-C(15)-C(16)    | 120.5(5)  |
| C(14)-C(15)-C(9)    | 119.2(5)  |
| C(14)-C(15)-C(16)   | 120.2(5)  |
| C(9)-C(10)-C(11)    | 120.8(6)  |
| C(12)-C(10)-C(9)    | 119.5(5)  |
| C(12)-C(10)-C(11)   | 119.7(5)  |
| C(10)-C(11)-H(11A)  | 109.5     |
| C(10)-C(11)-H(11B)  | 109.5     |
| C(10)-C(11)-H(11C)  | 109.5     |
| H(11A)-C(11)-H(11B) | 109.5     |
| H(11A)-C(11)-H(11C) | 109.5     |
| H(11B)-C(11)-H(11C) | 109.5     |
| S(2)-C(8)-H(8A)     | 106(4)    |
| S(2)-C(8)-H(8B)     | 106(3)    |
| C(9)-C(8)-S(2)      | 110.8(4)  |
| C(9)-C(8)-H(8A)     | 114(4)    |
| C(9)-C(8)-H(8B)     | 112(3)    |
| H(8A)-C(8)-H(8B)    | 108(5)    |
| C(15)-C(14)-H(14)   | 119.6     |
| C(13)-C(14)-C(15)   | 120.8(6)  |
| C(13)-C(14)-H(14)   | 119.6     |
| C(15)-C(16)-H(16)   | 116.8     |
| C(15)-C(16)-H(00H)  | 117.1     |
| C(00G)-C(16)-C(15)  | 126.5(14) |
| C(00G)-C(16)-H(16)  | 116.8     |
| C(17)-C(16)-C(15)   | 126(2)    |
| C(17)-C(16)-H(00H)  | 117.1     |
| C(1)-C(6)-S(1)      | 109.9(4)  |
| C(1)-C(6)-C(5)      | 122.3(6)  |
| C(5)-C(6)-S(1)      | 127.8(6)  |

|                     |           |
|---------------------|-----------|
| C(12)-C(13)-H(13)   | 120.4     |
| C(14)-C(13)-C(12)   | 119.2(6)  |
| C(14)-C(13)-H(13)   | 120.4     |
| C(6)-C(1)-N(1)      | 115.4(5)  |
| C(6)-C(1)-C(2)      | 120.8(6)  |
| C(2)-C(1)-N(1)      | 123.8(7)  |
| C(16)-C(00G)-H(00G) | 116.8     |
| C(16)-C(00G)-C(18)  | 126(2)    |
| C(18)-C(00G)-H(00G) | 116.8     |
| C(6)-C(5)-H(5)      | 121.7     |
| C(4)-C(5)-C(6)      | 116.6(8)  |
| C(4)-C(5)-H(5)      | 121.7     |
| C(25)-C(18)-C(00G)  | 116.5(12) |
| C(25)-C(18)-C(23)   | 120.0     |
| C(23)-C(18)-C(00G)  | 123.5(12) |
| C(18)-C(25)-H(25)   | 120.0     |
| C(26)-C(25)-C(18)   | 120.0     |
| C(26)-C(25)-H(25)   | 120.0     |
| C(25)-C(26)-H(26)   | 120.0     |
| C(25)-C(26)-C(21)   | 120.0     |
| C(21)-C(26)-H(26)   | 120.0     |
| C(26)-C(21)-H(21)   | 120.0     |
| C(22)-C(21)-C(26)   | 120.0     |
| C(22)-C(21)-H(21)   | 120.0     |
| C(21)-C(22)-H(22)   | 120.0     |
| C(21)-C(22)-C(23)   | 120.0     |
| C(23)-C(22)-H(22)   | 120.0     |
| C(18)-C(23)-H(23)   | 120.0     |
| C(22)-C(23)-C(18)   | 120.0     |
| C(22)-C(23)-H(23)   | 120.0     |
| C(1)-C(2)-H(2)      | 122.3     |
| C(1)-C(2)-C(3)      | 115.3(8)  |
| C(3)-C(2)-H(2)      | 122.3     |
| C(5)-C(4)-H(4)      | 119.4     |
| C(3)-C(4)-C(5)      | 121.2(7)  |
| C(3)-C(4)-H(4)      | 119.4     |

|                    |          |
|--------------------|----------|
| C(2)-C(3)-H(3)     | 118.2    |
| C(4)-C(3)-C(2)     | 123.7(7) |
| C(4)-C(3)-H(3)     | 118.2    |
| C(16)-C(17)-H(0AA) | 116.0    |
| C(16)-C(17)-C(24)  | 128(4)   |
| C(24)-C(17)-H(0AA) | 116.0    |
| C(19)-C(24)-C(17)  | 119(2)   |
| C(19)-C(24)-C(29)  | 120.0    |
| C(29)-C(24)-C(17)  | 121(2)   |
| C(24)-C(19)-H(00T) | 120.0    |
| C(20)-C(19)-C(24)  | 120.0    |
| C(20)-C(19)-H(00T) | 120.0    |
| C(19)-C(20)-H(5AA) | 120.0    |
| C(19)-C(20)-C(27)  | 120.0    |
| C(27)-C(20)-H(5AA) | 120.0    |
| C(20)-C(27)-H(4AA) | 120.0    |
| C(20)-C(27)-C(28)  | 120.0    |
| C(28)-C(27)-H(4AA) | 120.0    |
| C(27)-C(28)-H(3AA) | 120.0    |
| C(29)-C(28)-C(27)  | 120.0    |
| C(29)-C(28)-H(3AA) | 120.0    |
| C(24)-C(29)-H(2AA) | 120.0    |
| C(28)-C(29)-C(24)  | 120.0    |
| C(28)-C(29)-H(2AA) | 120.0    |

---

Symmetry transformations used to generate equivalent atoms:



**Table S36.** Anisotropic displacement parameters ( $\text{\AA}^2 \times 10^3$ ) for **6u**. The anisotropic displacement factor exponent takes the form:  $-2h^2 [h^2 a^{*2} U^{11} + \dots + 2hk a^* b^* U^{12}]$

|        | U11     | U22     | U33   | U23   | U13    | U12     |
|--------|---------|---------|-------|-------|--------|---------|
| S(2)   | 34(1)   | 25(1)   | 28(1) | -4(1) | 2(1)   | -2(1)   |
| S(1)   | 37(1)   | 30(1)   | 35(1) | 6(1)  | -1(1)  | -1(1)   |
| C(7)   | 35(3)   | 18(3)   | 28(2) | 5(2)  | -1(2)  | -5(2)   |
| N(1)   | 44(3)   | 27(3)   | 27(2) | 2(2)  | 0(2)   | -9(2)   |
| C(9)   | 38(3)   | 14(3)   | 28(2) | -5(2) | 2(2)   | 5(2)    |
| C(12)  | 26(3)   | 32(4)   | 34(3) | -3(3) | -2(2)  | 3(2)    |
| C(15)  | 33(3)   | 23(3)   | 28(2) | 0(2)  | 1(2)   | -1(2)   |
| C(10)  | 32(3)   | 27(3)   | 25(2) | -4(2) | 1(2)   | 8(2)    |
| C(11)  | 45(3)   | 33(4)   | 26(3) | -3(3) | -3(2)  | -2(3)   |
| C(8)   | 36(3)   | 25(3)   | 25(3) | 4(3)  | 3(2)   | 4(2)    |
| C(14)  | 37(3)   | 24(3)   | 35(3) | 4(3)  | 4(2)   | -2(3)   |
| C(16)  | 38(3)   | 33(4)   | 28(3) | 0(3)  | 4(2)   | -7(3)   |
| C(6)   | 45(3)   | 35(4)   | 33(3) | 17(3) | -4(2)  | -18(3)  |
| C(13)  | 38(3)   | 22(3)   | 44(3) | -3(3) | 0(2)   | -4(3)   |
| C(1)   | 52(3)   | 30(4)   | 27(3) | 9(2)  | -5(2)  | -17(3)  |
| C(00G) | 52(11)  | 52(14)  | 26(5) | 4(7)  | 4(5)   | -16(10) |
| C(5)   | 49(4)   | 48(4)   | 41(3) | 25(3) | -11(3) | -20(3)  |
| C(18)  | 77(6)   | 76(9)   | 34(4) | 24(5) | -9(4)  | -36(6)  |
| C(25)  | 77(6)   | 76(9)   | 34(4) | 24(5) | -9(4)  | -36(6)  |
| C(26)  | 125(11) | 106(16) | 32(5) | 30(8) | -17(6) | -67(12) |
| C(21)  | 102(7)  | 85(10)  | 45(5) | 29(6) | -30(5) | -45(8)  |
| C(22)  | 102(7)  | 85(10)  | 45(5) | 29(6) | -30(5) | -45(8)  |
| C(23)  | 58(6)   | 49(9)   | 41(5) | 24(6) | -12(4) | -10(6)  |
| C(2)   | 75(4)   | 46(5)   | 35(3) | -2(3) | 2(3)   | -30(4)  |
| C(4)   | 71(4)   | 65(6)   | 38(3) | 25(3) | -15(3) | -31(4)  |
| C(3)   | 88(5)   | 50(5)   | 31(3) | 8(3)  | -8(3)  | -37(4)  |
| C(17)  | 27(11)  | 24(12)  | 29(6) | 0(7)  | 4(6)   | -1(9)   |
| C(24)  | 49(9)   | 28(9)   | 25(5) | 5(5)  | 2(5)   | -9(7)   |
| C(19)  | 60(13)  | 34(11)  | 38(7) | 11(7) | -4(7)  | -13(10) |
| C(20)  | 91(14)  | 66(13)  | 27(6) | 13(8) | -7(7)  | -31(11) |
| C(27)  | 91(14)  | 66(13)  | 27(6) | 13(8) | -7(7)  | -31(11) |

|       |         |        |       |      |        |         |
|-------|---------|--------|-------|------|--------|---------|
| C(28) | 110(20) | 62(16) | 32(8) | 7(9) | -11(9) | -54(15) |
| C(29) | 49(9)   | 28(9)  | 25(5) | 5(5) | 2(5)   | -9(7)   |

---

**Table S37.** Hydrogen coordinates ( $\times 10^4$ ) and isotropic displacement parameters ( $\text{\AA}^2 \times 10^3$ ) for **6u**.

|        | x        | y         | z        | U(eq)  |
|--------|----------|-----------|----------|--------|
| H(12)  | 11892    | 8474      | 7407     | 37     |
| H(11A) | 9120     | 5264      | 7549     | 53     |
| H(11B) | 10540    | 5767      | 7712     | 53     |
| H(11C) | 10148    | 2582      | 7532     | 53     |
| H(14)  | 11312    | 9534      | 6416     | 38     |
| H(16)  | 8520     | 4883      | 6297     | 39     |
| H(00H) | 8664     | 4430      | 6286     | 39     |
| H(13)  | 12480    | 10649     | 6918     | 42     |
| H(00G) | 10377    | 7898      | 5963     | 52     |
| H(5)   | 2211     | 4479      | 6190     | 56     |
| H(25)  | 10233    | 7835      | 5392     | 76     |
| H(26)  | 9099     | 7124      | 4874     | 107    |
| H(21)  | 7017     | 5263      | 4840     | 95     |
| H(22)  | 6069     | 4112      | 5326     | 95     |
| H(23)  | 7203     | 4822      | 5844     | 61     |
| H(2)   | 5830     | -657      | 5840     | 63     |
| H(4)   | 2094     | 1689      | 5692     | 71     |
| H(3)   | 3838     | -685      | 5521     | 69     |
| H(0AA) | 9962     | 9002      | 6038     | 32     |
| H(00T) | 9310     | 10413     | 5454     | 53     |
| H(5AA) | 8187     | 9516      | 4938     | 74     |
| H(4AA) | 6922     | 5118      | 4856     | 74     |
| H(3AA) | 6780     | 1616      | 5290     | 84     |
| H(2AA) | 7903     | 2513      | 5806     | 41     |
| H(8A)  | 8360(60) | 2040(170) | 6682(17) | 50(20) |
| H(8B)  | 8750(50) | 1640(150) | 7073(14) | 23(15) |

Experimental Summary for Crystal **6x** (CCDC 1905646)

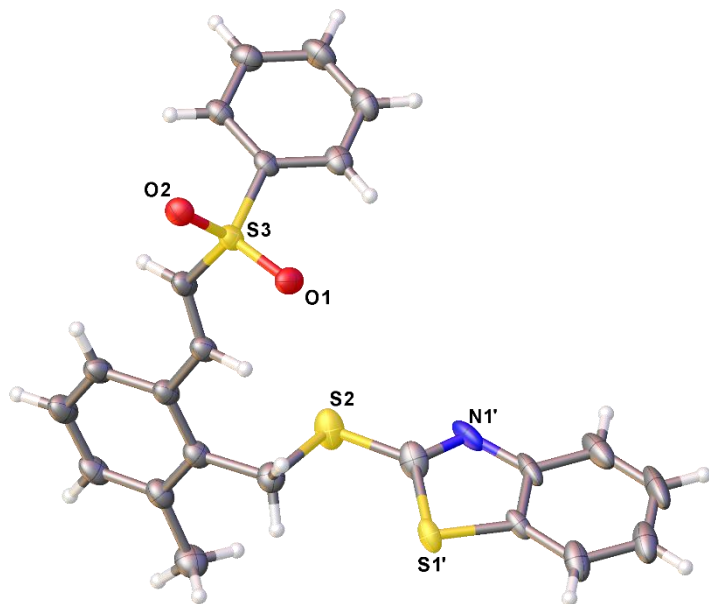

**Table S38.** Crystal data and structure refinement for **6x**.

|                                   |                                                                 |                  |
|-----------------------------------|-----------------------------------------------------------------|------------------|
| Empirical formula                 | C <sub>23</sub> H <sub>19</sub> N O <sub>2</sub> S <sub>3</sub> |                  |
| Formula weight                    | 437.57                                                          |                  |
| Temperature                       | 100.0 K                                                         |                  |
| Wavelength                        | 1.54178 Å                                                       |                  |
| Crystal system                    | Monoclinic                                                      |                  |
| Space group                       | P 21/n                                                          |                  |
| Unit cell dimensions              | a = 6.9999(12) Å                                                | ∠ = 90°.         |
|                                   | b = 10.6761(15) Å                                               | ∠ = 92.750(10)°. |
|                                   | c = 27.063(3) Å                                                 | ∠ = 90°.         |
| Volume                            | 2020.1(5) Å <sup>3</sup>                                        |                  |
| Z                                 | 4                                                               |                  |
| Density (calculated)              | 1.439 Mg/m <sup>3</sup>                                         |                  |
| Absorption coefficient            | 3.519 mm <sup>-1</sup>                                          |                  |
| F(000)                            | 912                                                             |                  |
| Crystal size                      | 0.22 x 0.08 x 0.04 mm <sup>3</sup>                              |                  |
| Theta range for data collection   | 3.270 to 68.234°.                                               |                  |
| Index ranges                      | -8 ≤ h ≤ 8, -12 ≤ k ≤ 12, -32 ≤ l ≤ 23                          |                  |
| Reflections collected             | 11679                                                           |                  |
| Independent reflections           | 3664 [R(int) = 0.0682]                                          |                  |
| Completeness to theta = 67.679°   | 99.5 %                                                          |                  |
| Absorption correction             | Semi-empirical from equivalents                                 |                  |
| Max. and min. transmission        | 0.7531 and 0.6198                                               |                  |
| Refinement method                 | Full-matrix least-squares on F <sup>2</sup>                     |                  |
| Data / restraints / parameters    | 3664 / 0 / 288                                                  |                  |
| Goodness-of-fit on F <sup>2</sup> | 1.032                                                           |                  |
| Final R indices [I > 2σ(I)]       | R1 = 0.0584, wR2 = 0.1444                                       |                  |
| R indices (all data)              | R1 = 0.0900, wR2 = 0.1621                                       |                  |
| Extinction coefficient            | n/a                                                             |                  |
| Largest diff. peak and hole       | 0.822 and -0.540 e.Å <sup>-3</sup>                              |                  |

**Table S39.** Atomic coordinates ( $\times 10^4$ ) and equivalent isotropic displacement parameters ( $\text{\AA}^2 \times 10^3$ ) for **6x**.  $U(\text{eq})$  is defined as one third of the trace of the orthogonalized  $U^{ij}$  tensor.

|        | x         | y        | z       | U(eq)  |
|--------|-----------|----------|---------|--------|
| S(3)   | 2551(1)   | 4033(1)  | 5480(1) | 31(1)  |
| S(2)   | 6872(2)   | 7452(1)  | 6660(1) | 52(1)  |
| S(1')  | 11108(2)  | 6534(1)  | 6649(1) | 35(1)  |
| O(2)   | 1581(4)   | 3628(2)  | 5026(1) | 37(1)  |
| O(1)   | 4465(4)   | 3592(2)  | 5594(1) | 38(1)  |
| C(4)   | 808(7)    | 2918(4)  | 6801(1) | 44(1)  |
| C(5)   | 1944(7)   | 3140(3)  | 6404(1) | 37(1)  |
| C(1)   | -834(6)   | 3921(3)  | 5934(1) | 32(1)  |
| C(3)   | -1101(8)  | 3221(4)  | 6771(2) | 47(1)  |
| C(11)  | 2727(7)   | 9704(4)  | 5381(2) | 45(1)  |
| C(6)   | 1101(6)   | 3643(3)  | 5978(1) | 29(1)  |
| C(9)   | 4235(6)   | 7718(3)  | 5579(1) | 33(1)  |
| N(1')  | 8873(9)   | 6400(5)  | 7389(2) | 44(1)  |
| C(23') | 11990(7)  | 5843(4)  | 7184(1) | 31(2)  |
| C(18') | 10621(6)  | 5861(4)  | 7539(2) | 42(2)  |
| C(19') | 11031(7)  | 5340(4)  | 8003(1) | 60(2)  |
| C(20') | 12810(8)  | 4803(4)  | 8111(1) | 71(3)  |
| C(21') | 14180(6)  | 4786(5)  | 7756(2) | 58(2)  |
| C(22') | 13769(7)  | 5306(4)  | 7292(1) | 50(2)  |
| C(13)  | 5907(7)   | 9671(4)  | 5775(1) | 39(1)  |
| C(15)  | 7642(8)   | 10383(4) | 5978(2) | 51(1)  |
| C(8)   | 4116(6)   | 6336(3)  | 5581(1) | 34(1)  |
| C(16)  | 7519(6)   | 7648(4)  | 6020(1) | 37(1)  |
| C(2)   | -1938(7)  | 3719(4)  | 6341(1) | 40(1)  |
| C(7)   | 2531(6)   | 5670(3)  | 5481(1) | 34(1)  |
| C(10)  | 2667(6)   | 8412(4)  | 5376(2) | 39(1)  |
| C(14)  | 5855(6)   | 8349(4)  | 5775(1) | 35(1)  |
| C(12)  | 4337(7)   | 10321(4) | 5584(2) | 42(1)  |
| N(1)   | 10140(30) | 6462(13) | 6787(6) | 35(1)  |
| S(1)   | 8353(7)   | 5825(5)  | 7559(2) | 38(2)  |
| C(23)  | 11390(20) | 5851(16) | 7144(6) | 90(15) |

|       |           |          |         |       |
|-------|-----------|----------|---------|-------|
| C(18) | 10682(16) | 5415(15) | 7584(6) | 29(5) |
| C(19) | 11880(20) | 4777(14) | 7922(4) | 39(3) |
| C(20) | 13780(20) | 4573(15) | 7821(5) | 39(3) |
| C(21) | 14488(17) | 5009(14) | 7381(6) | 39(3) |
| C(22) | 13290(20) | 5647(13) | 7043(4) | 39(3) |
| C(17) | 8858(7)   | 6729(4)  | 6943(1) | 45(1) |

---

**Table S40.** Bond lengths [Å] and angles [°] for **6x**.

---

|               |           |
|---------------|-----------|
| S(3)-O(2)     | 1.442(3)  |
| S(3)-O(1)     | 1.440(3)  |
| S(3)-C(6)     | 1.775(3)  |
| S(3)-C(7)     | 1.747(4)  |
| S(2)-C(16)    | 1.822(4)  |
| S(2)-C(17)    | 1.736(5)  |
| S(1')-C(23')  | 1.712(3)  |
| S(1')-C(17)   | 1.809(5)  |
| C(4)-C(5)     | 1.389(6)  |
| C(4)-C(3)     | 1.373(7)  |
| C(5)-C(6)     | 1.377(6)  |
| C(1)-C(6)     | 1.386(6)  |
| C(1)-C(2)     | 1.392(5)  |
| C(3)-C(2)     | 1.382(7)  |
| C(11)-C(10)   | 1.380(6)  |
| C(11)-C(12)   | 1.394(7)  |
| C(9)-C(8)     | 1.478(5)  |
| C(9)-C(10)    | 1.413(6)  |
| C(9)-C(14)    | 1.401(6)  |
| N(1')-C(18')  | 1.395(7)  |
| N(1')-C(17)   | 1.257(7)  |
| C(23')-C(18') | 1.3900    |
| C(23')-C(22') | 1.3900    |
| C(18')-C(19') | 1.3900    |
| C(19')-C(20') | 1.3900    |
| C(20')-C(21') | 1.3900    |
| C(21')-C(22') | 1.3900    |
| C(13)-C(15)   | 1.513(7)  |
| C(13)-C(14)   | 1.412(5)  |
| C(13)-C(12)   | 1.380(6)  |
| C(8)-C(7)     | 1.334(6)  |
| C(16)-C(14)   | 1.511(6)  |
| N(1)-C(23)    | 1.429(18) |
| N(1)-C(17)    | 1.05(2)   |

|             |           |
|-------------|-----------|
| S(1)-C(18)  | 1.686(12) |
| S(1)-C(17)  | 1.973(7)  |
| C(23)-C(18) | 1.3900    |
| C(23)-C(22) | 1.3900    |
| C(18)-C(19) | 1.3900    |
| C(19)-C(20) | 1.3900    |
| C(20)-C(21) | 1.3900    |
| C(21)-C(22) | 1.3900    |

|                      |            |
|----------------------|------------|
| O(2)-S(3)-C(6)       | 108.31(17) |
| O(2)-S(3)-C(7)       | 107.32(18) |
| O(1)-S(3)-O(2)       | 118.64(16) |
| O(1)-S(3)-C(6)       | 108.73(17) |
| O(1)-S(3)-C(7)       | 109.53(19) |
| C(7)-S(3)-C(6)       | 103.22(16) |
| C(17)-S(2)-C(16)     | 103.9(2)   |
| C(23')-S(1')-C(17)   | 88.0(2)    |
| C(3)-C(4)-C(5)       | 120.3(4)   |
| C(6)-C(5)-C(4)       | 118.4(4)   |
| C(6)-C(1)-C(2)       | 118.4(4)   |
| C(4)-C(3)-C(2)       | 120.9(4)   |
| C(10)-C(11)-C(12)    | 120.0(4)   |
| C(5)-C(6)-S(3)       | 119.2(3)   |
| C(5)-C(6)-C(1)       | 122.2(3)   |
| C(1)-C(6)-S(3)       | 118.4(3)   |
| C(10)-C(9)-C(8)      | 118.8(4)   |
| C(14)-C(9)-C(8)      | 121.6(4)   |
| C(14)-C(9)-C(10)     | 119.6(4)   |
| C(17)-N(1')-C(18')   | 111.2(5)   |
| C(18')-C(23')-S(1')  | 110.2(3)   |
| C(18')-C(23')-C(22') | 120.0      |
| C(22')-C(23')-S(1')  | 129.8(3)   |
| C(23')-C(18')-N(1')  | 115.4(4)   |
| C(23')-C(18')-C(19') | 120.0      |
| C(19')-C(18')-N(1')  | 124.6(4)   |
| C(20')-C(19')-C(18') | 120.0      |



|                      |           |
|----------------------|-----------|
| C(19')-C(20')-C(21') | 120.0     |
| C(22')-C(21')-C(20') | 120.0     |
| C(21')-C(22')-C(23') | 120.0     |
| C(14)-C(13)-C(15)    | 121.5(4)  |
| C(12)-C(13)-C(15)    | 119.6(4)  |
| C(12)-C(13)-C(14)    | 118.8(4)  |
| C(7)-C(8)-C(9)       | 125.3(4)  |
| C(14)-C(16)-S(2)     | 104.6(3)  |
| C(3)-C(2)-C(1)       | 119.7(4)  |
| C(8)-C(7)-S(3)       | 121.8(3)  |
| C(11)-C(10)-C(9)     | 119.8(5)  |
| C(9)-C(14)-C(13)     | 120.1(4)  |
| C(9)-C(14)-C(16)     | 121.4(3)  |
| C(13)-C(14)-C(16)    | 118.4(4)  |
| C(13)-C(12)-C(11)    | 121.6(4)  |
| C(17)-N(1)-C(23)     | 111.0(16) |
| C(18)-S(1)-C(17)     | 87.0(6)   |
| C(18)-C(23)-N(1)     | 120.1(15) |
| C(18)-C(23)-C(22)    | 120.0     |
| C(22)-C(23)-N(1)     | 119.9(15) |
| C(23)-C(18)-S(1)     | 105.2(10) |
| C(19)-C(18)-S(1)     | 134.8(10) |
| C(19)-C(18)-C(23)    | 120.0     |
| C(18)-C(19)-C(20)    | 120.0     |
| C(21)-C(20)-C(19)    | 120.0     |
| C(20)-C(21)-C(22)    | 120.0     |
| C(21)-C(22)-C(23)    | 120.0     |
| S(2)-C(17)-S(1')     | 123.5(2)  |
| S(2)-C(17)-S(1)      | 114.7(3)  |
| N(1')-C(17)-S(2)     | 121.2(4)  |
| N(1')-C(17)-S(1')    | 115.0(4)  |
| N(1)-C(17)-S(2)      | 128.7(8)  |
| N(1)-C(17)-S(1)      | 113.5(9)  |

---

Symmetry transformations used to generate equivalent atoms:

**Table S41.** Anisotropic displacement parameters ( $\text{\AA}^2 \times 10^3$ ) for **6x**. The anisotropic displacement factor exponent takes the form:  $-2h^2 [h^2 a^{*2} U^{11} + \dots + 2hk a^* b^* U^{12}]$

|        | U11    | U22    | U33     | U23     | U13     | U12    |
|--------|--------|--------|---------|---------|---------|--------|
| S(3)   | 35(1)  | 23(1)  | 36(1)   | 2(1)    | 7(1)    | 4(1)   |
| S(2)   | 73(1)  | 48(1)  | 35(1)   | -6(1)   | 7(1)    | 21(1)  |
| S(1')  | 61(1)  | 26(1)  | 19(1)   | -1(1)   | 3(1)    | 9(1)   |
| O(2)   | 40(2)  | 38(1)  | 34(1)   | -2(1)   | 9(1)    | 3(1)   |
| O(1)   | 33(2)  | 27(1)  | 54(2)   | 1(1)    | 6(1)    | 6(1)   |
| C(4)   | 65(3)  | 38(2)  | 28(2)   | 1(2)    | 0(2)    | -3(2)  |
| C(5)   | 51(3)  | 24(2)  | 36(2)   | -5(2)   | 0(2)    | -3(2)  |
| C(1)   | 42(2)  | 22(2)  | 32(2)   | -1(1)   | 8(2)    | -2(2)  |
| C(3)   | 66(3)  | 42(2)  | 34(2)   | 0(2)    | 16(2)   | -7(2)  |
| C(11)  | 43(3)  | 31(2)  | 61(3)   | 10(2)   | 13(2)   | 9(2)   |
| C(6)   | 40(2)  | 17(2)  | 30(2)   | -1(1)   | 5(2)    | 0(1)   |
| C(9)   | 34(2)  | 26(2)  | 41(2)   | 3(2)    | 9(2)    | 4(2)   |
| N(1')  | 78(4)  | 33(2)  | 22(2)   | 3(2)    | 11(2)   | -18(3) |
| C(23') | 59(4)  | 16(2)  | 18(2)   | -1(2)   | 7(2)    | -1(2)  |
| C(18') | 80(5)  | 24(4)  | 20(3)   | 5(2)    | -4(3)   | -14(3) |
| C(19') | 104(6) | 45(4)  | 31(3)   | 8(3)    | -7(3)   | -28(4) |
| C(20') | 130(8) | 42(3)  | 38(3)   | 18(3)   | -31(4)  | -25(4) |
| C(21') | 94(6)  | 31(3)  | 47(4)   | 4(3)    | -28(4)  | -2(4)  |
| C(22') | 90(6)  | 25(3)  | 35(3)   | -2(2)   | -14(3)  | 6(3)   |
| C(13)  | 51(3)  | 28(2)  | 39(2)   | 3(2)    | 7(2)    | 3(2)   |
| C(15)  | 65(3)  | 32(2)  | 57(3)   | -4(2)   | 0(2)    | -3(2)  |
| C(8)   | 34(2)  | 28(2)  | 41(2)   | 4(2)    | 9(2)    | 4(2)   |
| C(16)  | 45(2)  | 28(2)  | 38(2)   | -5(2)   | 0(2)    | 4(2)   |
| C(2)   | 45(3)  | 37(2)  | 40(2)   | -4(2)   | 11(2)   | -4(2)  |
| C(7)   | 32(2)  | 24(2)  | 46(2)   | 7(2)    | 7(2)    | 5(2)   |
| C(10)  | 35(2)  | 32(2)  | 53(2)   | 6(2)    | 11(2)   | 3(2)   |
| C(14)  | 42(2)  | 25(2)  | 39(2)   | 0(2)    | 8(2)    | 3(2)   |
| C(12)  | 55(3)  | 22(2)  | 51(2)   | 4(2)    | 14(2)   | 4(2)   |
| N(1)   | 61(1)  | 26(1)  | 19(1)   | -1(1)   | 3(1)    | 9(1)   |
| S(1)   | 41(3)  | 47(3)  | 25(2)   | 1(2)    | 2(2)    | 7(2)   |
| C(23)  | 26(13) | 63(19) | 180(40) | -40(20) | -27(17) | 19(12) |

|       |        |        |        |        |       |        |
|-------|--------|--------|--------|--------|-------|--------|
| C(18) | 29(10) | 31(14) | 25(10) | 17(8)  | -7(7) | -11(8) |
| C(19) | 56(7)  | 30(6)  | 30(5)  | 3(4)   | -2(4) | -4(5)  |
| C(20) | 56(7)  | 30(6)  | 30(5)  | 3(4)   | -2(4) | -4(5)  |
| C(21) | 56(7)  | 30(6)  | 30(5)  | 3(4)   | -2(4) | -4(5)  |
| C(22) | 56(7)  | 30(6)  | 30(5)  | 3(4)   | -2(4) | -4(5)  |
| C(17) | 73(3)  | 33(2)  | 28(2)  | -11(2) | 3(2)  | 10(2)  |

---

**Table S42.** Hydrogen coordinates ( $\times 10^4$ ) and isotropic displacement parameters ( $\text{\AA}^2 \times 10^3$ ) for **6x**.

|        | x     | y     | z    | U(eq) |
|--------|-------|-------|------|-------|
| H(4)   | 1354  | 2554  | 7096 | 52    |
| H(5)   | 3271  | 2949  | 6424 | 45    |
| H(1)   | -1394 | 4242  | 5634 | 38    |
| H(3)   | -1856 | 3086  | 7048 | 57    |
| H(11)  | 1671  | 10172 | 5247 | 54    |
| H(19') | 10095 | 5352  | 8245 | 72    |
| H(20') | 13091 | 4447  | 8428 | 85    |
| H(21') | 15396 | 4418  | 7830 | 70    |
| H(22') | 14705 | 5294  | 7049 | 61    |
| H(15A) | 7882  | 10173 | 6328 | 77    |
| H(15B) | 7409  | 11285 | 5945 | 77    |
| H(15C) | 8758  | 10152 | 5793 | 77    |
| H(8)   | 5260  | 5885  | 5660 | 41    |
| H(16A) | 8717  | 8135  | 6002 | 45    |
| H(16B) | 7692  | 6824  | 5860 | 45    |
| H(2)   | -3261 | 3922  | 6324 | 48    |
| H(7)   | 1361  | 6097  | 5409 | 41    |
| H(10)  | 1576  | 7990  | 5236 | 47    |
| H(12)  | 4353  | 11210 | 5590 | 51    |
| H(19)  | 11397 | 4479  | 8223 | 47    |
| H(20)  | 14601 | 4137  | 8052 | 47    |
| H(21)  | 15789 | 4870  | 7312 | 47    |
| H(22)  | 13773 | 5945  | 6742 | 47    |

Experimental Summary for Crystal **9** (CCDC 1905644)

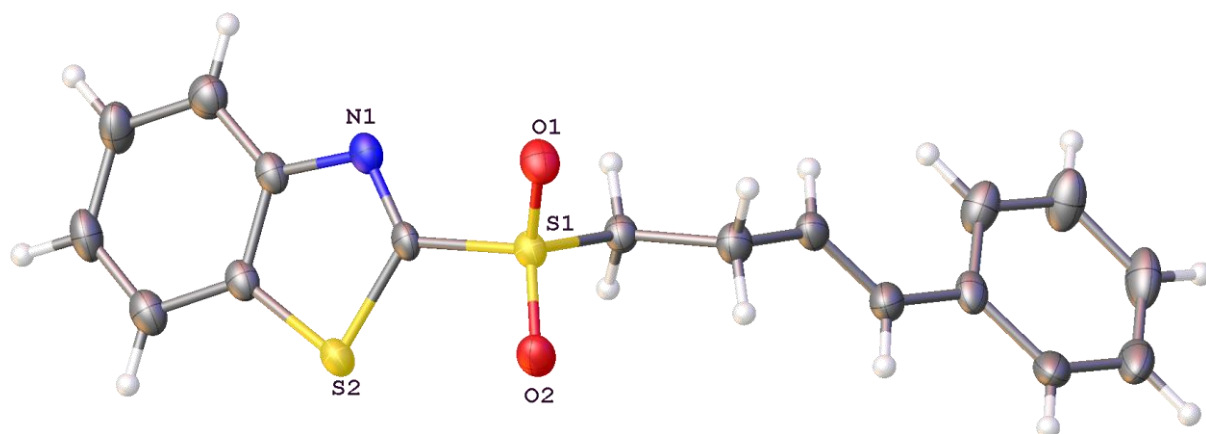

**Table S43.** Crystal data and structure refinement for **9**.

|                                   |                                             |                  |
|-----------------------------------|---------------------------------------------|------------------|
| Empirical formula                 | C17 H15 N O2 S2                             |                  |
| Formula weight                    | 329.42                                      |                  |
| Temperature                       | 100.0 K                                     |                  |
| Wavelength                        | 1.54178 Å                                   |                  |
| Crystal system                    | Monoclinic                                  |                  |
| Space group                       | C 2/c                                       |                  |
| Unit cell dimensions              | a = 32.753(3) Å                             | ∠ = 90°.         |
|                                   | b = 4.8880(4) Å                             | ∠ = 124.967(8)°. |
|                                   | c = 23.981(2) Å                             | ∠ = 90°.         |
| Volume                            | 3146.2(5) Å <sup>3</sup>                    |                  |
| Z                                 | 8                                           |                  |
| Density (calculated)              | 1.391 Mg/m <sup>3</sup>                     |                  |
| Absorption coefficient            | 3.117 mm <sup>-1</sup>                      |                  |
| F(000)                            | 1376                                        |                  |
| Crystal size                      | 0.24 x 0.07 x 0.03 mm <sup>3</sup>          |                  |
| Theta range for data collection   | 3.293 to 68.760°.                           |                  |
| Index ranges                      | -38 ≤ h ≤ 36, -5 ≤ k ≤ 5, -28 ≤ l ≤ 28      |                  |
| Reflections collected             | 10051                                       |                  |
| Independent reflections           | 2898 [R(int) = 0.0465]                      |                  |
| Completeness to theta = 67.679°   | 100.0 %                                     |                  |
| Absorption correction             | Semi-empirical from equivalents             |                  |
| Max. and min. transmission        | 0.7531 and 0.5787                           |                  |
| Refinement method                 | Full-matrix least-squares on F <sup>2</sup> |                  |
| Data / restraints / parameters    | 2898 / 0 / 199                              |                  |
| Goodness-of-fit on F <sup>2</sup> | 1.051                                       |                  |
| Final R indices [I > 2σ(I)]       | R1 = 0.0439, wR2 = 0.1151                   |                  |
| R indices (all data)              | R1 = 0.0548, wR2 = 0.1220                   |                  |
| Extinction coefficient            | n/a                                         |                  |
| Largest diff. peak and hole       | 0.507 and -0.353 e.Å <sup>-3</sup>          |                  |

**Table S44.** Atomic coordinates ( $\times 10^4$ ) and equivalent isotropic displacement parameters ( $\text{\AA}^2 \times 10^3$ ) for **9**.  $U(\text{eq})$  is defined as one third of the trace of the orthogonalized  $U^{ij}$  tensor.

|       | x       | y        | z       | $U(\text{eq})$ |
|-------|---------|----------|---------|----------------|
| S(1)  | 3331(1) | 2977(1)  | 3565(1) | 20(1)          |
| S(2)  | 4356(1) | 5597(1)  | 4352(1) | 24(1)          |
| N(1)  | 3686(1) | 6437(4)  | 3057(1) | 23(1)          |
| O(1)  | 3061(1) | 1501(4)  | 2933(1) | 28(1)          |
| O(2)  | 3603(1) | 1473(4)  | 4197(1) | 28(1)          |
| C(7)  | 3778(1) | 5121(5)  | 3583(1) | 20(1)          |
| C(6)  | 4095(1) | 8059(5)  | 3242(1) | 23(1)          |
| C(1)  | 4502(1) | 7840(5)  | 3930(1) | 23(1)          |
| C(8)  | 2925(1) | 5362(5)  | 3569(1) | 21(1)          |
| C(9)  | 2522(1) | 3857(5)  | 3585(1) | 27(1)          |
| C(13) | 1624(1) | 6965(7)  | 4570(1) | 35(1)          |
| C(2)  | 4943(1) | 9303(6)  | 4185(1) | 29(1)          |
| C(11) | 2084(1) | 5851(6)  | 4067(1) | 28(1)          |
| C(12) | 1720(1) | 7533(6)  | 4083(1) | 28(1)          |
| C(10) | 2178(1) | 5836(5)  | 3596(1) | 26(1)          |
| C(3)  | 4961(1) | 11000(6) | 3742(2) | 33(1)          |
| C(17) | 1443(1) | 9610(6)  | 3613(2) | 33(1)          |
| C(5)  | 4124(1) | 9821(5)  | 2806(1) | 30(1)          |
| C(4)  | 4554(1) | 11290(6) | 3058(2) | 34(1)          |
| C(16) | 1089(1) | 11055(6) | 3635(2) | 42(1)          |
| C(15) | 1004(1) | 10463(6) | 4128(2) | 40(1)          |
| C(14) | 1269(1) | 8406(7)  | 4589(1) | 39(1)          |

**Table S45.** Bond lengths [Å] and angles [°] for **9**.

---

|             |            |
|-------------|------------|
| S(1)-O(1)   | 1.4362(18) |
| S(1)-O(2)   | 1.4433(18) |
| S(1)-C(7)   | 1.782(2)   |
| S(1)-C(8)   | 1.773(2)   |
| S(2)-C(7)   | 1.742(2)   |
| S(2)-C(1)   | 1.736(3)   |
| N(1)-C(7)   | 1.288(3)   |
| N(1)-C(6)   | 1.393(3)   |
| C(6)-C(1)   | 1.409(3)   |
| C(6)-C(5)   | 1.398(4)   |
| C(1)-C(2)   | 1.400(4)   |
| C(8)-H(8A)  | 0.9900     |
| C(8)-H(8B)  | 0.9900     |
| C(8)-C(9)   | 1.531(3)   |
| C(9)-H(9A)  | 0.9900     |
| C(9)-H(9B)  | 0.9900     |
| C(9)-C(10)  | 1.497(4)   |
| C(13)-H(13) | 0.9500     |
| C(13)-C(12) | 1.403(4)   |
| C(13)-C(14) | 1.379(4)   |
| C(2)-H(2)   | 0.9500     |
| C(2)-C(3)   | 1.375(4)   |
| C(11)-H(11) | 0.9500     |
| C(11)-C(12) | 1.466(4)   |
| C(11)-C(10) | 1.330(4)   |
| C(12)-C(17) | 1.398(4)   |
| C(10)-H(10) | 0.9500     |
| C(3)-H(3)   | 0.9500     |
| C(3)-C(4)   | 1.407(4)   |
| C(17)-H(17) | 0.9500     |
| C(17)-C(16) | 1.385(4)   |
| C(5)-H(5)   | 0.9500     |
| C(5)-C(4)   | 1.377(4)   |
| C(4)-H(4)   | 0.9500     |

|                   |            |
|-------------------|------------|
| C(16)-H(16)       | 0.9500     |
| C(16)-C(15)       | 1.392(4)   |
| C(15)-H(15)       | 0.9500     |
| C(15)-C(14)       | 1.373(5)   |
| C(14)-H(14)       | 0.9500     |
| O(1)-S(1)-O(2)    | 119.22(11) |
| O(1)-S(1)-C(7)    | 108.71(11) |
| O(1)-S(1)-C(8)    | 109.01(11) |
| O(2)-S(1)-C(7)    | 105.67(11) |
| O(2)-S(1)-C(8)    | 110.11(11) |
| C(8)-S(1)-C(7)    | 102.83(11) |
| C(1)-S(2)-C(7)    | 87.79(11)  |
| C(7)-N(1)-C(6)    | 109.2(2)   |
| S(2)-C(7)-S(1)    | 118.85(14) |
| N(1)-C(7)-S(1)    | 122.81(18) |
| N(1)-C(7)-S(2)    | 118.26(18) |
| N(1)-C(6)-C(1)    | 114.9(2)   |
| N(1)-C(6)-C(5)    | 125.2(2)   |
| C(5)-C(6)-C(1)    | 119.9(2)   |
| C(6)-C(1)-S(2)    | 109.82(18) |
| C(2)-C(1)-S(2)    | 128.9(2)   |
| C(2)-C(1)-C(6)    | 121.3(2)   |
| S(1)-C(8)-H(8A)   | 109.6      |
| S(1)-C(8)-H(8B)   | 109.6      |
| H(8A)-C(8)-H(8B)  | 108.1      |
| C(9)-C(8)-S(1)    | 110.13(17) |
| C(9)-C(8)-H(8A)   | 109.6      |
| C(9)-C(8)-H(8B)   | 109.6      |
| C(8)-C(9)-H(9A)   | 109.4      |
| C(8)-C(9)-H(9B)   | 109.4      |
| H(9A)-C(9)-H(9B)  | 108.0      |
| C(10)-C(9)-C(8)   | 111.0(2)   |
| C(10)-C(9)-H(9A)  | 109.4      |
| C(10)-C(9)-H(9B)  | 109.4      |
| C(12)-C(13)-H(13) | 119.3      |



|                   |          |
|-------------------|----------|
| C(14)-C(13)-H(13) | 119.3    |
| C(14)-C(13)-C(12) | 121.4(3) |
| C(1)-C(2)-H(2)    | 121.3    |
| C(3)-C(2)-C(1)    | 117.4(3) |
| C(3)-C(2)-H(2)    | 121.3    |
| C(12)-C(11)-H(11) | 116.1    |
| C(10)-C(11)-H(11) | 116.1    |
| C(10)-C(11)-C(12) | 127.8(3) |
| C(13)-C(12)-C(11) | 119.1(3) |
| C(17)-C(12)-C(13) | 117.6(3) |
| C(17)-C(12)-C(11) | 123.3(2) |
| C(9)-C(10)-H(10)  | 117.9    |
| C(11)-C(10)-C(9)  | 124.2(2) |
| C(11)-C(10)-H(10) | 117.9    |
| C(2)-C(3)-H(3)    | 119.0    |
| C(2)-C(3)-C(4)    | 122.0(2) |
| C(4)-C(3)-H(3)    | 119.0    |
| C(12)-C(17)-H(17) | 119.7    |
| C(16)-C(17)-C(12) | 120.7(3) |
| C(16)-C(17)-H(17) | 119.7    |
| C(6)-C(5)-H(5)    | 120.5    |
| C(4)-C(5)-C(6)    | 118.9(3) |
| C(4)-C(5)-H(5)    | 120.5    |
| C(3)-C(4)-H(4)    | 119.8    |
| C(5)-C(4)-C(3)    | 120.4(3) |
| C(5)-C(4)-H(4)    | 119.8    |
| C(17)-C(16)-H(16) | 119.8    |
| C(17)-C(16)-C(15) | 120.4(3) |
| C(15)-C(16)-H(16) | 119.8    |
| C(16)-C(15)-H(15) | 120.2    |
| C(14)-C(15)-C(16) | 119.5(3) |
| C(14)-C(15)-H(15) | 120.2    |
| C(13)-C(14)-H(14) | 119.9    |
| C(15)-C(14)-C(13) | 120.3(3) |
| C(15)-C(14)-H(14) | 119.9    |

Symmetry transformations used to generate equivalent atoms:

**Table S46.** Anisotropic displacement parameters ( $\text{\AA}^2 \times 10^3$ ) for **9**. The anisotropic displacement factor exponent takes the form:  $-2h^2 [h^2 a^{*2} U^{11} + \dots + 2hk a^* b^* U^{12}]$

|       | U <sup>11</sup> | U <sup>22</sup> | U <sup>33</sup> | U <sup>23</sup> | U <sup>13</sup> | U <sup>12</sup> |
|-------|-----------------|-----------------|-----------------|-----------------|-----------------|-----------------|
| S(1)  | 17(1)           | 17(1)           | 24(1)           | -1(1)           | 11(1)           | 0(1)            |
| S(2)  | 16(1)           | 26(1)           | 25(1)           | 1(1)            | 9(1)            | 0(1)            |
| N(1)  | 18(1)           | 20(1)           | 30(1)           | -2(1)           | 14(1)           | 0(1)            |
| O(1)  | 26(1)           | 25(1)           | 31(1)           | -8(1)           | 16(1)           | -5(1)           |
| O(2)  | 24(1)           | 26(1)           | 31(1)           | 9(1)            | 14(1)           | 3(1)            |
| C(7)  | 14(1)           | 19(1)           | 26(1)           | -2(1)           | 12(1)           | 2(1)            |
| C(6)  | 20(1)           | 20(1)           | 29(1)           | -1(1)           | 15(1)           | 2(1)            |
| C(1)  | 18(1)           | 22(1)           | 29(1)           | -1(1)           | 13(1)           | 3(1)            |
| C(8)  | 20(1)           | 20(1)           | 24(1)           | -1(1)           | 12(1)           | 1(1)            |
| C(9)  | 24(1)           | 26(1)           | 32(1)           | 4(1)            | 17(1)           | 0(1)            |
| C(13) | 22(1)           | 60(2)           | 21(1)           | -3(1)           | 10(1)           | -7(1)           |
| C(2)  | 19(1)           | 30(1)           | 34(1)           | -3(1)           | 12(1)           | -2(1)           |
| C(11) | 22(1)           | 36(2)           | 25(1)           | 0(1)            | 12(1)           | -4(1)           |
| C(12) | 22(1)           | 35(2)           | 27(1)           | -10(1)          | 15(1)           | -11(1)          |
| C(10) | 20(1)           | 29(1)           | 27(1)           | 0(1)            | 13(1)           | -4(1)           |
| C(3)  | 21(1)           | 31(2)           | 50(2)           | -1(1)           | 22(1)           | -3(1)           |
| C(17) | 41(2)           | 27(1)           | 45(2)           | -4(1)           | 32(2)           | -5(1)           |
| C(5)  | 26(1)           | 29(1)           | 35(2)           | 5(1)            | 18(1)           | 4(1)            |
| C(4)  | 30(2)           | 30(2)           | 48(2)           | 7(1)            | 26(1)           | 2(1)            |
| C(16) | 50(2)           | 29(2)           | 68(2)           | 1(1)            | 46(2)           | 1(1)            |
| C(15) | 38(2)           | 41(2)           | 60(2)           | -21(2)          | 39(2)           | -14(1)          |
| C(14) | 28(2)           | 67(2)           | 28(1)           | -14(1)          | 19(1)           | -14(1)          |

**Table S47.** Hydrogen coordinates ( $\times 10^4$ ) and isotropic displacement parameters ( $\text{\AA}^2 \times 10^3$ ) for **9**.

|       | x    | y     | z    | U(eq) |
|-------|------|-------|------|-------|
| H(8A) | 3118 | 6565  | 3972 | 25    |
| H(8B) | 2767 | 6522  | 3156 | 25    |
| H(9A) | 2328 | 2669  | 3179 | 32    |
| H(9B) | 2681 | 2677  | 3994 | 32    |
| H(13) | 1806 | 5558  | 4894 | 42    |
| H(2)  | 5220 | 9129  | 4646 | 35    |
| H(11) | 2275 | 4624  | 4437 | 34    |
| H(10) | 2017 | 7168  | 3245 | 31    |
| H(3)  | 5257 | 12007 | 3903 | 40    |
| H(17) | 1498 | 10036 | 3274 | 40    |
| H(5)  | 3850 | 10002 | 2344 | 36    |
| H(4)  | 4577 | 12508 | 2768 | 41    |
| H(16) | 903  | 12459 | 3311 | 50    |
| H(15) | 764  | 11476 | 4146 | 48    |
| H(14) | 1208 | 7973  | 4921 | 47    |

Experimental Summary for Crystal **17** (CCDC 1905651)

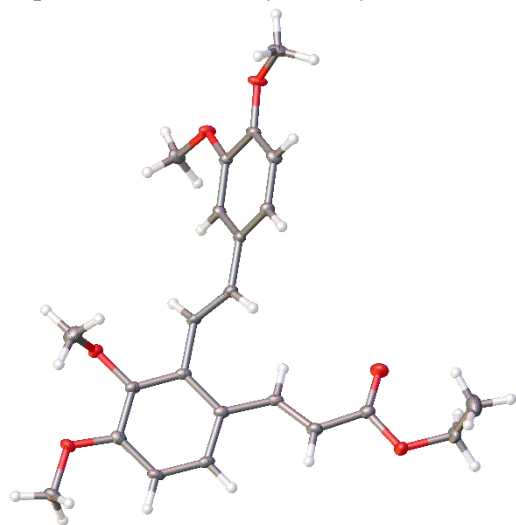

**Table S48.** Crystal data and structure refinement for **17**.

|                                   |                                                |                 |
|-----------------------------------|------------------------------------------------|-----------------|
| Empirical formula                 | C <sub>23</sub> H <sub>26</sub> O <sub>6</sub> |                 |
| Molecular formula                 | C <sub>23</sub> H <sub>26</sub> O <sub>6</sub> |                 |
| Formula weight                    | 398.44                                         |                 |
| Temperature                       | 100.0 K                                        |                 |
| Wavelength                        | 0.71073 Å                                      |                 |
| Crystal system                    | Triclinic                                      |                 |
| Space group                       | P-1                                            |                 |
| Unit cell dimensions              | a = 9.7261(18) Å                               | α = 65.750(6)°. |
|                                   | b = 10.890(2) Å                                | β = 69.528(6)°. |
|                                   | c = 11.528(2) Å                                | γ = 86.877(7)°. |
| Volume                            | 1037.2(4) Å <sup>3</sup>                       |                 |
| Z                                 | 2                                              |                 |
| Density (calculated)              | 1.276 Mg/m <sup>3</sup>                        |                 |
| Absorption coefficient            | 0.092 mm <sup>-1</sup>                         |                 |
| F(000)                            | 424                                            |                 |
| Crystal size                      | 0.27 x 0.175 x 0.125 mm <sup>3</sup>           |                 |
| Crystal color, habit              | colorless irregular                            |                 |
| Theta range for data collection   | 2.062 to 26.370°.                              |                 |
| Index ranges                      | -12 ≤ h ≤ 12, -13 ≤ k ≤ 13, -14 ≤ l ≤ 9        |                 |
| Reflections collected             | 12189                                          |                 |
| Independent reflections           | 4247 [R(int) = 0.0316]                         |                 |
| Completeness to theta = 25.242°   | 100.0 %                                        |                 |
| Absorption correction             | Semi-empirical from equivalents                |                 |
| Max. and min. transmission        | 0.7454 and 0.6883                              |                 |
| Refinement method                 | Full-matrix least-squares on F <sup>2</sup>    |                 |
| Data / restraints / parameters    | 4247 / 0 / 267                                 |                 |
| Goodness-of-fit on F <sup>2</sup> | 1.032                                          |                 |
| Final R indices [I > 2σ(I)]       | R1 = 0.0387, wR2 = 0.0937                      |                 |
| R indices (all data)              | R1 = 0.0484, wR2 = 0.0993                      |                 |
| Largest diff. peak and hole       | 0.265 and -0.219 e.Å <sup>-3</sup>             |                 |

**Table S49.** Atomic coordinates ( $\times 10^4$ ) and equivalent isotropic displacement parameters ( $\text{\AA}^2 \times 10^3$ ) for **17**.  $U(\text{eq})$  is defined as one third of the trace of the orthogonalized  $U^{ij}$  tensor.

|       | x       | y        | z        | U(eq) |
|-------|---------|----------|----------|-------|
| O(1)  | 3065(1) | 4128(1)  | 9445(1)  | 23(1) |
| O(2)  | 3312(1) | 5785(1)  | 7386(1)  | 28(1) |
| O(3)  | 3067(1) | -189(1)  | 4490(1)  | 19(1) |
| O(4)  | 3041(1) | 2429(1)  | 2943(1)  | 18(1) |
| O(5)  | 3814(1) | 9398(1)  | -360(1)  | 16(1) |
| O(6)  | 1505(1) | 10530(1) | 459(1)   | 18(1) |
| C(1)  | 1576(2) | 5646(2)  | 10344(2) | 40(1) |
| C(2)  | 3075(2) | 5155(2)  | 9941(2)  | 27(1) |
| C(3)  | 3180(2) | 4593(1)  | 8129(1)  | 18(1) |
| C(4)  | 3115(1) | 3465(1)  | 7754(1)  | 17(1) |
| C(5)  | 3340(1) | 3714(1)  | 6460(1)  | 16(1) |
| C(6)  | 3270(1) | 2703(1)  | 5952(1)  | 14(1) |
| C(7)  | 3340(1) | 1330(1)  | 6732(1)  | 16(1) |
| C(8)  | 3275(1) | 340(1)   | 6292(1)  | 16(1) |
| C(9)  | 3148(1) | 692(1)   | 5030(1)  | 15(1) |
| C(10) | 3102(1) | 2063(1)  | 4223(1)  | 15(1) |
| C(11) | 3147(1) | 3075(1)  | 4661(1)  | 13(1) |
| C(12) | 3057(1) | 4478(1)  | 3738(1)  | 14(1) |
| C(13) | 2213(1) | 5367(1)  | 4094(1)  | 14(1) |
| C(14) | 2073(1) | 6741(1)  | 3164(1)  | 13(1) |
| C(15) | 3115(1) | 7418(1)  | 1828(1)  | 14(1) |
| C(16) | 2891(1) | 8672(1)  | 957(1)   | 13(1) |
| C(17) | 1620(1) | 9290(1)  | 1406(1)  | 14(1) |
| C(18) | 609(1)  | 8644(1)  | 2721(1)  | 16(1) |
| C(19) | 845(1)  | 7376(1)  | 3591(1)  | 15(1) |
| C(20) | 1638(2) | 2071(2)  | 2961(2)  | 27(1) |
| C(21) | 2989(2) | -1608(1) | 5337(1)  | 21(1) |

|       |         |          |         |       |
|-------|---------|----------|---------|-------|
| C(22) | 5085(2) | 8792(1)  | -890(1) | 19(1) |
| C(23) | 131(2)  | 11093(1) | 792(1)  | 21(1) |

---

**Table S50.** Bond lengths [ $\text{\AA}$ ] and angles [ $^\circ$ ] for **17**.

---

|            |            |
|------------|------------|
| 1)-C(2)    | 1.4515(17) |
| O(1)-C(3)  | 1.3523(16) |
| O(2)-C(3)  | 1.2097(16) |
| O(3)-C(9)  | 1.3592(16) |
| O(3)-C(21) | 1.4382(15) |
| O(4)-C(10) | 1.3840(16) |
| O(4)-C(20) | 1.4298(17) |
| O(5)-C(16) | 1.3687(15) |
| O(5)-C(22) | 1.4321(16) |
| O(6)-C(17) | 1.3731(14) |
| O(6)-C(23) | 1.4333(16) |
| C(1)-H(1A) | 0.9800     |
| C(1)-H(1B) | 0.9800     |
| C(1)-H(1C) | 0.9800     |
| C(1)-C(2)  | 1.507(2)   |
| C(2)-H(2A) | 0.9900     |
| C(2)-H(2B) | 0.9900     |
| C(3)-C(4)  | 1.4699(19) |
| C(4)-H(4)  | 0.9500     |
| C(4)-C(5)  | 1.3389(19) |
| C(5)-H(5)  | 0.9500     |
| C(5)-C(6)  | 1.4576(19) |
| C(6)-C(7)  | 1.4056(17) |
| C(6)-C(11) | 1.4213(18) |
| C(7)-H(7)  | 0.9500     |
| C(7)-C(8)  | 1.3788(19) |

|                |            |
|----------------|------------|
| C(8)-H(8)      | 0.9500     |
| C(8)-C(9)      | 1.3933(19) |
| C(9)-C(10)     | 1.4068(17) |
| C(10)-C(11)    | 1.3949(19) |
| C(11)-C(12)    | 1.4803(16) |
| C(12)-H(12)    | 0.9500     |
| C(12)-C(13)    | 1.3355(18) |
| C(13)-H(13)    | 0.9500     |
| C(13)-C(14)    | 1.4727(17) |
| C(14)-C(15)    | 1.4143(17) |
| C(14)-C(19)    | 1.3876(18) |
| C(15)-H(15)    | 0.9500     |
| C(15)-C(16)    | 1.3834(17) |
| C(16)-C(17)    | 1.4134(18) |
| C(17)-C(18)    | 1.3843(18) |
| C(18)-H(18)    | 0.9500     |
| C(18)-C(19)    | 1.3982(17) |
| C(19)-H(19)    | 0.9500     |
| C(20)-H(20A)   | 0.9800     |
| C(20)-H(20B)   | 0.9800     |
| C(20)-H(20C)   | 0.9800     |
| C(21)-H(21A)   | 0.9800     |
| C(21)-H(21B)   | 0.9800     |
| C(21)-H(21C)   | 0.9800     |
| C(22)-H(22A)   | 0.9800     |
| C(22)-H(22B)   | 0.9800     |
| C(22)-H(22C)   | 0.9800     |
| C(23)-H(23A)   | 0.9800     |
| C(23)-H(23B)   | 0.9800     |
| C(23)-H(23C)   | 0.9800     |
| C(3)-O(1)-C(2) | 115.78(11) |



|                  |            |
|------------------|------------|
| C(9)-O(3)-C(21)  | 117.09(10) |
| C(10)-O(4)-C(20) | 114.17(10) |
| C(16)-O(5)-C(22) | 117.39(10) |
| C(17)-O(6)-C(23) | 116.84(10) |
| H(1A)-C(1)-H(1B) | 109.5      |
| H(1A)-C(1)-H(1C) | 109.5      |
| H(1B)-C(1)-H(1C) | 109.5      |
| C(2)-C(1)-H(1A)  | 109.5      |
| C(2)-C(1)-H(1B)  | 109.5      |
| C(2)-C(1)-H(1C)  | 109.5      |
| O(1)-C(2)-C(1)   | 111.76(12) |
| O(1)-C(2)-H(2A)  | 109.3      |
| O(1)-C(2)-H(2B)  | 109.3      |
| C(1)-C(2)-H(2A)  | 109.3      |
| C(1)-C(2)-H(2B)  | 109.3      |
| H(2A)-C(2)-H(2B) | 107.9      |
| O(1)-C(3)-C(4)   | 110.92(11) |
| O(2)-C(3)-O(1)   | 123.13(13) |
| O(2)-C(3)-C(4)   | 125.95(12) |
| C(3)-C(4)-H(4)   | 120.0      |
| C(5)-C(4)-C(3)   | 120.07(12) |
| C(5)-C(4)-H(4)   | 120.0      |
| C(4)-C(5)-H(5)   | 117.0      |
| C(4)-C(5)-C(6)   | 125.95(12) |
| C(6)-C(5)-H(5)   | 117.0      |
| C(7)-C(6)-C(5)   | 120.34(12) |
| C(7)-C(6)-C(11)  | 118.37(12) |
| C(11)-C(6)-C(5)  | 121.29(11) |
| C(6)-C(7)-H(7)   | 118.9      |
| C(8)-C(7)-C(6)   | 122.25(12) |
| C(8)-C(7)-H(7)   | 118.9      |
| C(7)-C(8)-H(8)   | 120.1      |

|                   |            |
|-------------------|------------|
| C(7)-C(8)-C(9)    | 119.89(12) |
| C(9)-C(8)-H(8)    | 120.1      |
| O(3)-C(9)-C(8)    | 125.35(11) |
| O(3)-C(9)-C(10)   | 115.86(11) |
| C(8)-C(9)-C(10)   | 118.78(12) |
| O(4)-C(10)-C(9)   | 119.17(12) |
| O(4)-C(10)-C(11)  | 118.79(11) |
| C(11)-C(10)-C(9)  | 122.03(12) |
| C(6)-C(11)-C(12)  | 124.11(12) |
| C(10)-C(11)-C(6)  | 118.66(11) |
| C(10)-C(11)-C(12) | 117.23(11) |
| C(11)-C(12)-H(12) | 116.9      |
| C(13)-C(12)-C(11) | 126.24(11) |
| C(13)-C(12)-H(12) | 116.9      |
| C(12)-C(13)-H(13) | 116.9      |
| C(12)-C(13)-C(14) | 126.10(12) |
| C(14)-C(13)-H(13) | 116.9      |
| C(15)-C(14)-C(13) | 122.43(11) |
| C(19)-C(14)-C(13) | 118.93(11) |
| C(19)-C(14)-C(15) | 118.59(11) |
| C(14)-C(15)-H(15) | 119.8      |
| C(16)-C(15)-C(14) | 120.49(12) |
| C(16)-C(15)-H(15) | 119.8      |
| O(5)-C(16)-C(15)  | 125.07(12) |
| O(5)-C(16)-C(17)  | 114.98(10) |
| C(15)-C(16)-C(17) | 119.95(11) |
| O(6)-C(17)-C(16)  | 115.09(11) |
| O(6)-C(17)-C(18)  | 125.04(12) |
| C(18)-C(17)-C(16) | 119.86(11) |
| C(17)-C(18)-H(18) | 120.2      |
| C(17)-C(18)-C(19) | 119.69(12) |
| C(19)-C(18)-H(18) | 120.2      |

|                     |            |
|---------------------|------------|
| C(14)-C(19)-C(18)   | 121.39(12) |
| C(14)-C(19)-H(19)   | 119.3      |
| C(18)-C(19)-H(19)   | 119.3      |
| O(4)-C(20)-H(20A)   | 109.5      |
| O(4)-C(20)-H(20B)   | 109.5      |
| O(4)-C(20)-H(20C)   | 109.5      |
| H(20A)-C(20)-H(20B) | 109.5      |
| H(20A)-C(20)-H(20C) | 109.5      |
| H(20B)-C(20)-H(20C) | 109.5      |
| O(3)-C(21)-H(21A)   | 109.5      |
| O(3)-C(21)-H(21B)   | 109.5      |
| O(3)-C(21)-H(21C)   | 109.5      |
| H(21A)-C(21)-H(21B) | 109.5      |
| H(21A)-C(21)-H(21C) | 109.5      |
| H(21B)-C(21)-H(21C) | 109.5      |
| O(5)-C(22)-H(22A)   | 109.5      |
| O(5)-C(22)-H(22B)   | 109.5      |
| O(5)-C(22)-H(22C)   | 109.5      |
| H(22A)-C(22)-H(22B) | 109.5      |
| H(22A)-C(22)-H(22C) | 109.5      |
| H(22B)-C(22)-H(22C) | 109.5      |
| O(6)-C(23)-H(23A)   | 109.5      |
| O(6)-C(23)-H(23B)   | 109.5      |
| O(6)-C(23)-H(23C)   | 109.5      |
| H(23A)-C(23)-H(23B) | 109.5      |
| H(23A)-C(23)-H(23C) | 109.5      |
| H(23B)-C(23)-H(23C) | 109.5      |

---

**Table S51.** Anisotropic displacement parameters ( $\text{\AA}^2 \times 10^3$ ) for **17**. The anisotropic displacement factor exponent takes the form:  $-2h^2 [h^2 a^*2U^{11} + \dots + 2hk a^* b^* U^{12}]$

|       | U <sup>11</sup> | U <sup>22</sup> | U <sup>33</sup> | U <sup>23</sup> | U <sup>13</sup> | U <sup>12</sup> |
|-------|-----------------|-----------------|-----------------|-----------------|-----------------|-----------------|
| O(1)  | 40(1)           | 16(1)           | 19(1)           | -7(1)           | -17(1)          | 5(1)            |
| O(2)  | 44(1)           | 13(1)           | 25(1)           | -2(1)           | -17(1)          | 1(1)            |
| O(3)  | 27(1)           | 11(1)           | 19(1)           | -5(1)           | -9(1)           | 4(1)            |
| O(4)  | 23(1)           | 16(1)           | 13(1)           | -5(1)           | -7(1)           | 3(1)            |
| O(5)  | 17(1)           | 14(1)           | 11(1)           | -1(1)           | -2(1)           | 4(1)            |
| O(6)  | 16(1)           | 12(1)           | 18(1)           | 0(1)            | -5(1)           | 5(1)            |
| C(1)  | 53(1)           | 41(1)           | 57(1)           | -37(1)          | -37(1)          | 22(1)           |
| C(2)  | 42(1)           | 22(1)           | 31(1)           | -16(1)          | -25(1)          | 8(1)            |
| C(3)  | 20(1)           | 16(1)           | 17(1)           | -4(1)           | -9(1)           | 1(1)            |
| C(4)  | 20(1)           | 12(1)           | 16(1)           | -2(1)           | -7(1)           | 0(1)            |
| C(5)  | 15(1)           | 13(1)           | 15(1)           | -2(1)           | -6(1)           | 2(1)            |
| C(6)  | 12(1)           | 14(1)           | 13(1)           | -3(1)           | -3(1)           | 2(1)            |
| C(7)  | 15(1)           | 17(1)           | 12(1)           | -2(1)           | -5(1)           | 3(1)            |
| C(8)  | 15(1)           | 11(1)           | 15(1)           | 0(1)            | -4(1)           | 3(1)            |
| C(9)  | 12(1)           | 14(1)           | 16(1)           | -5(1)           | -2(1)           | 2(1)            |
| C(10) | 13(1)           | 15(1)           | 11(1)           | -2(1)           | -3(1)           | 2(1)            |
| C(11) | 10(1)           | 13(1)           | 11(1)           | -2(1)           | -2(1)           | 2(1)            |
| C(12) | 15(1)           | 13(1)           | 9(1)            | -1(1)           | -4(1)           | 0(1)            |
| C(13) | 16(1)           | 14(1)           | 10(1)           | -2(1)           | -5(1)           | -1(1)           |
| C(14) | 16(1)           | 11(1)           | 13(1)           | -4(1)           | -7(1)           | 0(1)            |
| C(15) | 13(1)           | 13(1)           | 14(1)           | -6(1)           | -5(1)           | 3(1)            |
| C(16) | 14(1)           | 13(1)           | 11(1)           | -3(1)           | -4(1)           | -1(1)           |
| C(17) | 16(1)           | 10(1)           | 16(1)           | -2(1)           | -8(1)           | 2(1)            |
| C(18) | 13(1)           | 15(1)           | 18(1)           | -7(1)           | -4(1)           | 3(1)            |
| C(19) | 15(1)           | 15(1)           | 12(1)           | -3(1)           | -3(1)           | -1(1)           |
| C(20) | 28(1)           | 31(1)           | 24(1)           | -10(1)          | -14(1)          | 3(1)            |

|       |       |       |       |       |       |      |
|-------|-------|-------|-------|-------|-------|------|
| C(21) | 24(1) | 11(1) | 23(1) | -4(1) | -7(1) | 2(1) |
| C(22) | 18(1) | 16(1) | 15(1) | -5(1) | 0(1)  | 3(1) |
| C(23) | 18(1) | 16(1) | 23(1) | -3(1) | -8(1) | 7(1) |

---

**Table S52.** Hydrogen coordinates ( $\times 10^4$ ) and isotropic displacement parameters ( $\text{\AA}^2 \times 10^3$ ) for **17**.

|        | x    | y     | z     | U(eq) |
|--------|------|-------|-------|-------|
| H(1A)  | 1303 | 6099  | 9537  | 60    |
| H(1B)  | 1606 | 6285  | 10737 | 60    |
| H(1C)  | 845  | 4873  | 11020 | 60    |
| H(2A)  | 3800 | 5931  | 9219  | 32    |
| H(2B)  | 3388 | 4776  | 10738 | 32    |
| H(4)   | 2914 | 2559  | 8431  | 20    |
| H(5)   | 3566 | 4634  | 5814  | 19    |
| H(7)   | 3435 | 1075  | 7591  | 19    |
| H(8)   | 3318 | -579  | 6848  | 20    |
| H(12)  | 3657 | 4776  | 2802  | 16    |
| H(13)  | 1650 | 5087  | 5037  | 17    |
| H(15)  | 3975 | 7010  | 1526  | 16    |
| H(18)  | -241 | 9061  | 3031  | 20    |
| H(19)  | 151  | 6940  | 4494  | 18    |
| H(20A) | 1694 | 2319  | 2026  | 41    |
| H(20B) | 890  | 2556  | 3377  | 41    |
| H(20C) | 1369 | 1093  | 3493  | 41    |
| H(21A) | 2921 | -2137 | 4844  | 31    |
| H(21B) | 2115 | -1864 | 6173  | 31    |
| H(21C) | 3877 | -1790 | 5573  | 31    |
| H(22A) | 5642 | 9401  | -1840 | 28    |
| H(22B) | 4770 | 7929  | -847  | 28    |
| H(22C) | 5711 | 8630  | -346  | 28    |
| H(23A) | 145  | 11929 | 11    | 31    |
| H(23B) | -12  | 11293 | 1579  | 31    |
| H(23C) | -679 | 10441 | 1015  | 31    |

Experimental Summary for Crystal **20** (CCDC 1905645)

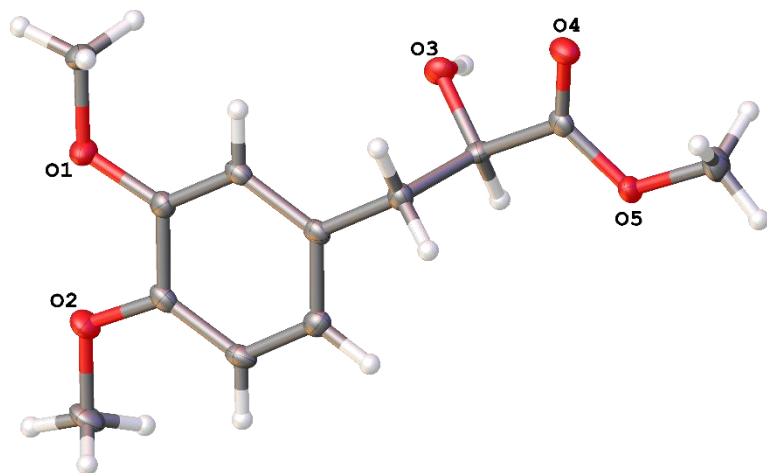

**Table S53.** Crystal data and structure refinement for **20**.

|                                   |                                                 |                  |
|-----------------------------------|-------------------------------------------------|------------------|
| Empirical formula                 | C <sub>24</sub> H <sub>32</sub> O <sub>10</sub> |                  |
| Formula weight                    | 480.49                                          |                  |
| Temperature                       | 100.0 K                                         |                  |
| Wavelength                        | 0.71073 Å                                       |                  |
| Crystal system                    | Monoclinic                                      |                  |
| Space group                       | P 21                                            |                  |
| Unit cell dimensions              | a = 11.200(2) Å                                 | ∠ = 90°.         |
|                                   | b = 5.0559(9) Å                                 | ∠ = 115.351(5)°. |
|                                   | c = 11.554(2) Å                                 | ∠ = 90°.         |
| Volume                            | 591.26(19) Å <sup>3</sup>                       |                  |
| Z                                 | 1                                               |                  |
| Density (calculated)              | 1.349 Mg/m <sup>3</sup>                         |                  |
| Absorption coefficient            | 0.105 mm <sup>-1</sup>                          |                  |
| F(000)                            | 256                                             |                  |
| Crystal size                      | 0.3 x 0.2 x 0.08 mm <sup>3</sup>                |                  |
| Theta range for data collection   | 1.950 to 25.351°.                               |                  |
| Index ranges                      | -13 ≤ h ≤ 13, -6 ≤ k ≤ 6, -13 ≤ l ≤ 13          |                  |
| Reflections collected             | 9807                                            |                  |
| Independent reflections           | 2156 [R(int) = 0.0543]                          |                  |
| Completeness to theta = 25.242°   | 100.0 %                                         |                  |
| Absorption correction             | Semi-empirical from equivalents                 |                  |
| Max. and min. transmission        | 0.7452 and 0.5315                               |                  |
| Refinement method                 | Full-matrix least-squares on F <sup>2</sup>     |                  |
| Data / restraints / parameters    | 2156 / 1 / 158                                  |                  |
| Goodness-of-fit on F <sup>2</sup> | 1.045                                           |                  |
| Final R indices [I > 2σ(I)]       | R1 = 0.0340, wR2 = 0.0733                       |                  |
| R indices (all data)              | R1 = 0.0439, wR2 = 0.0772                       |                  |
| Absolute structure parameter      | -0.2(7)                                         |                  |
| Extinction coefficient            | n/a                                             |                  |
| Largest diff. peak and hole       | 0.152 and -0.190 e.Å <sup>-3</sup>              |                  |

**Table S54.** Atomic coordinates ( $\times 10^4$ ) and equivalent isotropic displacement parameters ( $\text{\AA}^2 \times 10^3$ ) for **20**.  $U(\text{eq})$  is defined as one third of the trace of the orthogonalized  $U^{ij}$  tensor.

|       | x         | y         | z         | U(eq) |
|-------|-----------|-----------|-----------|-------|
| O(1)  | -11306(2) | -11614(4) | -11962(2) | 21(1) |
| O(2)  | -11113(2) | -14746(4) | -13657(2) | 23(1) |
| O(3)  | -14395(2) | -16629(4) | -10450(2) | 19(1) |
| O(4)  | -17019(2) | -16121(4) | -10792(2) | 21(1) |
| O(5)  | -17458(2) | -19711(4) | -12052(2) | 18(1) |
| C(1)  | -18648(3) | -20137(6) | -11856(3) | 24(1) |
| C(2)  | -16702(3) | -17679(5) | -11408(2) | 16(1) |
| C(3)  | -15449(2) | -17500(5) | -11594(2) | 15(1) |
| C(4)  | -15646(2) | -15466(5) | -12647(2) | 17(1) |
| C(5)  | -14453(2) | -15279(5) | -12937(2) | 16(1) |
| C(6)  | -13444(3) | -13459(5) | -12294(2) | 15(1) |
| C(7)  | -12346(3) | -13318(5) | -12546(2) | 16(1) |
| C(8)  | -12243(2) | -15016(5) | -13469(2) | 17(1) |
| C(9)  | -13235(2) | -16812(6) | -14094(2) | 18(1) |
| C(10) | -14340(3) | -16939(5) | -13833(2) | 18(1) |
| C(11) | -11396(3) | -9851(6)  | -11033(2) | 21(1) |
| C(12) | -10985(3) | -16507(6) | -14556(2) | 25(1) |



**Table S55.** Bond lengths [Å] and angles [°] for **20**.

---

|              |          |
|--------------|----------|
| O(1)-C(7)    | 1.372(3) |
| O(1)-C(11)   | 1.431(3) |
| O(2)-C(8)    | 1.379(3) |
| O(2)-C(12)   | 1.422(3) |
| O(3)-H(3)    | 0.8400   |
| O(3)-C(3)    | 1.414(3) |
| O(4)-C(2)    | 1.212(3) |
| O(5)-C(1)    | 1.461(3) |
| O(5)-C(2)    | 1.337(3) |
| C(1)-H(1A)   | 0.9800   |
| C(1)-H(1B)   | 0.9800   |
| C(1)-H(1C)   | 0.9800   |
| C(2)-C(3)    | 1.511(4) |
| C(3)-H(3A)   | 1.0000   |
| C(3)-C(4)    | 1.535(3) |
| C(4)-H(4A)   | 0.9900   |
| C(4)-H(4B)   | 0.9900   |
| C(4)-C(5)    | 1.514(4) |
| C(5)-C(6)    | 1.398(4) |
| C(5)-C(10)   | 1.380(3) |
| C(6)-H(6)    | 0.9500   |
| C(6)-C(7)    | 1.382(3) |
| C(7)-C(8)    | 1.412(4) |
| C(8)-C(9)    | 1.376(4) |
| C(9)-H(9)    | 0.9500   |
| C(9)-C(10)   | 1.396(4) |
| C(10)-H(10)  | 0.9500   |
| C(11)-H(11A) | 0.9800   |
| C(11)-H(11B) | 0.9800   |
| C(11)-H(11C) | 0.9800   |
| C(12)-H(12A) | 0.9800   |
| C(12)-H(12B) | 0.9800   |
| C(12)-H(12C) | 0.9800   |

|                  |            |
|------------------|------------|
| C(7)-O(1)-C(11)  | 116.2(2)   |
| C(8)-O(2)-C(12)  | 116.1(2)   |
| C(3)-O(3)-H(3)   | 109.5      |
| C(2)-O(5)-C(1)   | 115.41(19) |
| O(5)-C(1)-H(1A)  | 109.5      |
| O(5)-C(1)-H(1B)  | 109.5      |
| O(5)-C(1)-H(1C)  | 109.5      |
| H(1A)-C(1)-H(1B) | 109.5      |
| H(1A)-C(1)-H(1C) | 109.5      |
| H(1B)-C(1)-H(1C) | 109.5      |
| O(4)-C(2)-O(5)   | 123.5(2)   |
| O(4)-C(2)-C(3)   | 124.6(2)   |
| O(5)-C(2)-C(3)   | 111.9(2)   |
| O(3)-C(3)-C(2)   | 109.9(2)   |
| O(3)-C(3)-H(3A)  | 109.9      |
| O(3)-C(3)-C(4)   | 108.15(19) |
| C(2)-C(3)-H(3A)  | 109.9      |
| C(2)-C(3)-C(4)   | 109.0(2)   |
| C(4)-C(3)-H(3A)  | 109.9      |
| C(3)-C(4)-H(4A)  | 109.2      |
| C(3)-C(4)-H(4B)  | 109.2      |
| H(4A)-C(4)-H(4B) | 107.9      |
| C(5)-C(4)-C(3)   | 112.1(2)   |
| C(5)-C(4)-H(4A)  | 109.2      |
| C(5)-C(4)-H(4B)  | 109.2      |
| C(6)-C(5)-C(4)   | 120.8(2)   |
| C(10)-C(5)-C(4)  | 120.1(2)   |
| C(10)-C(5)-C(6)  | 119.1(2)   |
| C(5)-C(6)-H(6)   | 119.6      |
| C(7)-C(6)-C(5)   | 120.7(2)   |
| C(7)-C(6)-H(6)   | 119.6      |
| O(1)-C(7)-C(6)   | 125.0(2)   |
| O(1)-C(7)-C(8)   | 115.2(2)   |
| C(6)-C(7)-C(8)   | 119.7(2)   |
| O(2)-C(8)-C(7)   | 115.9(2)   |
| C(9)-C(8)-O(2)   | 124.8(2)   |

|                     |          |
|---------------------|----------|
| C(9)-C(8)-C(7)      | 119.3(2) |
| C(8)-C(9)-H(9)      | 119.7    |
| C(8)-C(9)-C(10)     | 120.5(2) |
| C(10)-C(9)-H(9)     | 119.7    |
| C(5)-C(10)-C(9)     | 120.6(2) |
| C(5)-C(10)-H(10)    | 119.7    |
| C(9)-C(10)-H(10)    | 119.7    |
| O(1)-C(11)-H(11A)   | 109.5    |
| O(1)-C(11)-H(11B)   | 109.5    |
| O(1)-C(11)-H(11C)   | 109.5    |
| H(11A)-C(11)-H(11B) | 109.5    |
| H(11A)-C(11)-H(11C) | 109.5    |
| H(11B)-C(11)-H(11C) | 109.5    |
| O(2)-C(12)-H(12A)   | 109.5    |
| O(2)-C(12)-H(12B)   | 109.5    |
| O(2)-C(12)-H(12C)   | 109.5    |
| H(12A)-C(12)-H(12B) | 109.5    |
| H(12A)-C(12)-H(12C) | 109.5    |
| H(12B)-C(12)-H(12C) | 109.5    |

---

Symmetry transformations used to generate equivalent atoms:

**Table S56.** Anisotropic displacement parameters ( $\text{\AA}^2 \times 10^3$ ) for **20**. The anisotropic displacement factor exponent takes the form:  $-2 \square^2 [ h^2 a^*2 U^{11} + \dots + 2 h k a^* b^* U^{12} ]$

|       | U11   | U22   | U33   | U23   | U13   | U12   |
|-------|-------|-------|-------|-------|-------|-------|
| O(1)  | 23(1) | 21(1) | 23(1) | -7(1) | 14(1) | -6(1) |
| O(2)  | 24(1) | 27(1) | 24(1) | -5(1) | 17(1) | -2(1) |
| O(3)  | 21(1) | 21(1) | 13(1) | 1(1)  | 4(1)  | -1(1) |
| O(4)  | 27(1) | 19(1) | 20(1) | -2(1) | 15(1) | -1(1) |
| O(5)  | 18(1) | 22(1) | 17(1) | -3(1) | 10(1) | -6(1) |
| C(1)  | 20(2) | 29(2) | 25(2) | 1(1)  | 12(1) | -4(1) |
| C(2)  | 19(1) | 15(1) | 13(1) | 4(1)  | 8(1)  | 1(1)  |
| C(3)  | 18(1) | 14(1) | 14(1) | -4(1) | 7(1)  | -2(1) |
| C(4)  | 18(1) | 18(1) | 15(1) | 2(1)  | 7(1)  | -2(1) |
| C(5)  | 20(2) | 16(1) | 12(1) | 3(1)  | 8(1)  | 1(1)  |
| C(6)  | 21(2) | 15(1) | 13(1) | 2(1)  | 10(1) | 3(1)  |
| C(7)  | 19(2) | 16(1) | 15(1) | 2(1)  | 8(1)  | -1(1) |
| C(8)  | 20(1) | 20(2) | 15(1) | 4(1)  | 10(1) | 3(1)  |
| C(9)  | 25(2) | 20(2) | 13(1) | 0(1)  | 10(1) | 2(1)  |
| C(10) | 21(1) | 18(2) | 15(1) | 1(1)  | 6(1)  | -2(1) |
| C(11) | 26(2) | 20(2) | 19(1) | -6(1) | 11(1) | -4(1) |
| C(12) | 32(2) | 30(2) | 21(1) | -2(1) | 19(1) | 3(1)  |

**Table S57.** Hydrogen coordinates ( $\times 10^4$ ) and isotropic displacement parameters ( $\text{\AA}^2 \times 10^3$ ) for **20**.

|        | x      | y      | z      | U(eq) |
|--------|--------|--------|--------|-------|
| H(3)   | -13974 | -17944 | -10027 | 29    |
| H(1A)  | -18398 | -20690 | -10969 | 36    |
| H(1B)  | -19189 | -21517 | -12441 | 36    |
| H(1C)  | -19155 | -18488 | -12025 | 36    |
| H(3A)  | -15234 | -19268 | -11844 | 18    |
| H(4A)  | -16428 | -15969 | -13436 | 21    |
| H(4B)  | -15820 | -13710 | -12373 | 21    |
| H(6)   | -13515 | -12307 | -11677 | 18    |
| H(9)   | -13166 | -17974 | -14709 | 22    |
| H(10)  | -15021 | -18179 | -14276 | 22    |
| H(11A) | -11426 | -10877 | -10326 | 32    |
| H(11B) | -12201 | -8785  | -11435 | 32    |
| H(11C) | -10623 | -8684  | -10702 | 32    |
| H(12A) | -11053 | -18336 | -14309 | 38    |
| H(12B) | -10125 | -16241 | -14570 | 38    |
| H(12C) | -11690 | -16159 | -15410 | 38    |

Experimental Summary for Crystal **22** (CCDC 1905648)

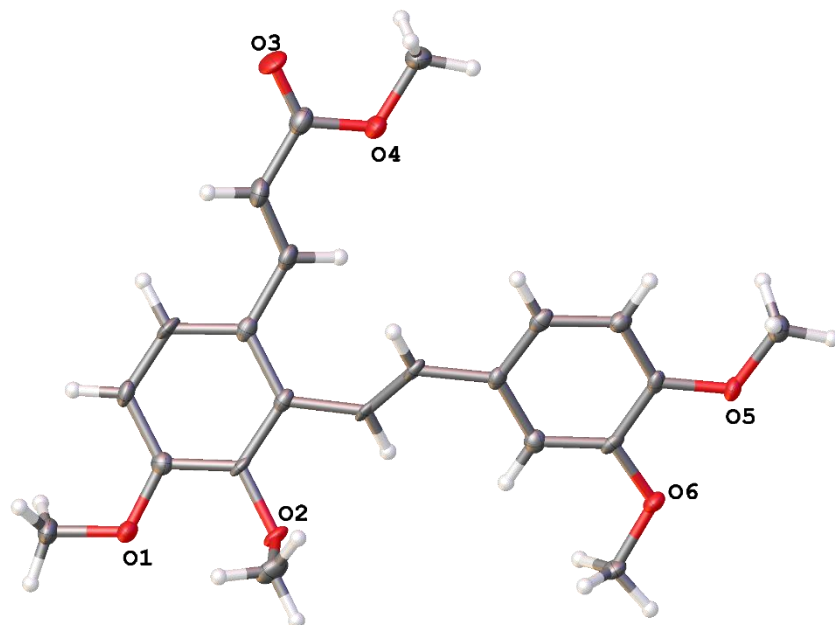

**Table S58.** Crystal data and structure refinement for **22**.

|                                   |                                                |                  |
|-----------------------------------|------------------------------------------------|------------------|
| Empirical formula                 | C <sub>22</sub> H <sub>24</sub> O <sub>6</sub> |                  |
| Formula weight                    | 384.41                                         |                  |
| Temperature                       | 100.0 K                                        |                  |
| Wavelength                        | 0.71073 Å                                      |                  |
| Crystal system                    | Monoclinic                                     |                  |
| Space group                       | P 21/c                                         |                  |
| Unit cell dimensions              | a = 19.271(5) Å                                | ∠ = 90°.         |
|                                   | b = 4.5166(9) Å                                | ∠ = 107.803(9)°. |
|                                   | c = 23.345(7) Å                                | ∠ = 90°.         |
| Volume                            | 1934.6(9) Å <sup>3</sup>                       |                  |
| Z                                 | 4                                              |                  |
| Density (calculated)              | 1.320 Mg/m <sup>3</sup>                        |                  |
| Absorption coefficient            | 0.096 mm <sup>-1</sup>                         |                  |
| F(000)                            | 816                                            |                  |
| Crystal size                      | 0.29 x 0.26 x 0.08 mm <sup>3</sup>             |                  |
| Theta range for data collection   | 1.829 to 25.387°.                              |                  |
| Index ranges                      | -23 ≤ h ≤ 19, -5 ≤ k ≤ 5, -28 ≤ l ≤ 26         |                  |
| Reflections collected             | 12378                                          |                  |
| Independent reflections           | 3529 [R(int) = 0.0632]                         |                  |
| Completeness to theta = 25.242°   | 98.9 %                                         |                  |
| Absorption correction             | Semi-empirical from equivalents                |                  |
| Max. and min. transmission        | 0.7452 and 0.6249                              |                  |
| Refinement method                 | Full-matrix least-squares on F <sup>2</sup>    |                  |
| Data / restraints / parameters    | 3529 / 0 / 258                                 |                  |
| Goodness-of-fit on F <sup>2</sup> | 1.004                                          |                  |
| Final R indices [I > 2σ(I)]       | R1 = 0.0511, wR2 = 0.1209                      |                  |
| R indices (all data)              | R1 = 0.0836, wR2 = 0.1394                      |                  |
| Extinction coefficient            | n/a                                            |                  |

Largest diff. peak and hole

0.300 and -0.285 e.Å<sup>-3</sup>

**Table S59.** Atomic coordinates ( $\times 10^4$ ) and equivalent isotropic displacement parameters ( $\text{\AA}^2 \times 10^3$ ) for **22**.  $U(\text{eq})$  is defined as one third of the trace of the orthogonalized  $U^{ij}$  tensor.

|       | x       | y        | z       | $U(\text{eq})$ |
|-------|---------|----------|---------|----------------|
| O(1)  | 1224(1) | 11665(3) | 3585(1) | 22(1)          |
| O(2)  | 2551(1) | 9716(3)  | 4180(1) | 18(1)          |
| O(3)  | 838(1)  | 1961(4)  | 6750(1) | 35(1)          |
| O(4)  | 2013(1) | 3204(3)  | 6946(1) | 27(1)          |
| O(5)  | 6103(1) | 3094(3)  | 7036(1) | 19(1)          |
| O(6)  | 5828(1) | 6651(3)  | 6140(1) | 20(1)          |
| C(1)  | 533(1)  | 12979(5) | 3279(1) | 28(1)          |
| C(2)  | 1298(1) | 10311(4) | 4123(1) | 17(1)          |
| C(3)  | 734(1)  | 9880(4)  | 4372(1) | 20(1)          |
| C(4)  | 882(1)  | 8441(5)  | 4921(1) | 20(1)          |
| C(5)  | 1576(1) | 7433(4)  | 5242(1) | 16(1)          |
| C(6)  | 2152(1) | 7868(4)  | 4990(1) | 15(1)          |
| C(7)  | 1994(1) | 9294(4)  | 4433(1) | 15(1)          |
| C(8)  | 2567(1) | 7431(5)  | 3757(1) | 28(1)          |
| C(9)  | 1696(1) | 6045(4)  | 5834(1) | 18(1)          |
| C(10) | 1190(1) | 4568(5)  | 6008(1) | 23(1)          |
| C(11) | 1315(1) | 3151(5)  | 6596(1) | 23(1)          |
| C(12) | 2152(2) | 1614(5)  | 7512(1) | 33(1)          |
| C(13) | 2915(1) | 7020(4)  | 5288(1) | 16(1)          |
| C(14) | 3172(1) | 4673(4)  | 5634(1) | 15(1)          |
| C(15) | 3941(1) | 4084(4)  | 5961(1) | 14(1)          |
| C(16) | 4110(1) | 2012(4)  | 6423(1) | 17(1)          |
| C(17) | 4827(1) | 1611(4)  | 6793(1) | 16(1)          |
| C(18) | 5388(1) | 3245(4)  | 6699(1) | 15(1)          |
| C(19) | 5229(1) | 5246(4)  | 6210(1) | 15(1)          |
| C(20) | 4523(1) | 5662(4)  | 5855(1) | 15(1)          |
| C(21) | 5717(1) | 8385(4)  | 5608(1) | 21(1)          |
| C(22) | 6282(1) | 1047(5)  | 7524(1) | 22(1)          |



**Table S60.** Bond lengths [Å] and angles [°] for **22**.

---

|              |          |
|--------------|----------|
| O(1)-C(1)    | 1.435(3) |
| O(1)-C(2)    | 1.364(3) |
| O(2)-C(7)    | 1.387(2) |
| O(2)-C(8)    | 1.435(3) |
| O(3)-C(11)   | 1.209(3) |
| O(4)-C(11)   | 1.344(3) |
| O(4)-C(12)   | 1.454(3) |
| O(5)-C(18)   | 1.365(3) |
| O(5)-C(22)   | 1.424(3) |
| O(6)-C(19)   | 1.370(2) |
| O(6)-C(21)   | 1.427(2) |
| C(1)-H(1A)   | 0.9800   |
| C(1)-H(1B)   | 0.9800   |
| C(1)-H(1C)   | 0.9800   |
| C(2)-C(3)    | 1.393(3) |
| C(2)-C(7)    | 1.394(3) |
| C(3)-H(3)    | 0.9500   |
| C(3)-C(4)    | 1.386(3) |
| C(4)-H(4)    | 0.9500   |
| C(4)-C(5)    | 1.394(3) |
| C(5)-C(6)    | 1.419(3) |
| C(5)-C(9)    | 1.471(3) |
| C(6)-C(7)    | 1.399(3) |
| C(6)-C(13)   | 1.472(3) |
| C(8)-H(8A)   | 0.9800   |
| C(8)-H(8B)   | 0.9800   |
| C(8)-H(8C)   | 0.9800   |
| C(9)-H(9)    | 0.9500   |
| C(9)-C(10)   | 1.341(3) |
| C(10)-H(10)  | 0.9500   |
| C(10)-C(11)  | 1.467(3) |
| C(12)-H(12A) | 0.9800   |
| C(12)-H(12B) | 0.9800   |
| C(12)-H(12C) | 0.9800   |

|                  |            |
|------------------|------------|
| C(13)-H(13)      | 0.9500     |
| C(13)-C(14)      | 1.334(3)   |
| C(14)-H(14)      | 0.9500     |
| C(14)-C(15)      | 1.469(3)   |
| C(15)-C(16)      | 1.389(3)   |
| C(15)-C(20)      | 1.414(3)   |
| C(16)-H(16)      | 0.9500     |
| C(16)-C(17)      | 1.399(3)   |
| C(17)-H(17)      | 0.9500     |
| C(17)-C(18)      | 1.379(3)   |
| C(18)-C(19)      | 1.414(3)   |
| C(19)-C(20)      | 1.374(3)   |
| C(20)-H(20)      | 0.9500     |
| C(21)-H(21A)     | 0.9800     |
| C(21)-H(21B)     | 0.9800     |
| C(21)-H(21C)     | 0.9800     |
| C(22)-H(22A)     | 0.9800     |
| C(22)-H(22B)     | 0.9800     |
| C(22)-H(22C)     | 0.9800     |
|                  |            |
| C(2)-O(1)-C(1)   | 117.62(18) |
| C(7)-O(2)-C(8)   | 112.12(16) |
| C(11)-O(4)-C(12) | 114.57(18) |
| C(18)-O(5)-C(22) | 116.65(16) |
| C(19)-O(6)-C(21) | 116.76(17) |
| O(1)-C(1)-H(1A)  | 109.5      |
| O(1)-C(1)-H(1B)  | 109.5      |
| O(1)-C(1)-H(1C)  | 109.5      |
| H(1A)-C(1)-H(1B) | 109.5      |
| H(1A)-C(1)-H(1C) | 109.5      |
| H(1B)-C(1)-H(1C) | 109.5      |
| O(1)-C(2)-C(3)   | 124.9(2)   |
| O(1)-C(2)-C(7)   | 116.0(2)   |
| C(3)-C(2)-C(7)   | 119.1(2)   |
| C(2)-C(3)-H(3)   | 120.5      |
| C(4)-C(3)-C(2)   | 119.0(2)   |

|                     |            |
|---------------------|------------|
| C(4)-C(3)-H(3)      | 120.5      |
| C(3)-C(4)-H(4)      | 118.5      |
| C(3)-C(4)-C(5)      | 122.9(2)   |
| C(5)-C(4)-H(4)      | 118.5      |
| C(4)-C(5)-C(6)      | 118.3(2)   |
| C(4)-C(5)-C(9)      | 119.6(2)   |
| C(6)-C(5)-C(9)      | 122.0(2)   |
| C(5)-C(6)-C(13)     | 124.35(19) |
| C(7)-C(6)-C(5)      | 118.2(2)   |
| C(7)-C(6)-C(13)     | 117.36(19) |
| O(2)-C(7)-C(2)      | 118.75(19) |
| O(2)-C(7)-C(6)      | 118.85(19) |
| C(2)-C(7)-C(6)      | 122.4(2)   |
| O(2)-C(8)-H(8A)     | 109.5      |
| O(2)-C(8)-H(8B)     | 109.5      |
| O(2)-C(8)-H(8C)     | 109.5      |
| H(8A)-C(8)-H(8B)    | 109.5      |
| H(8A)-C(8)-H(8C)    | 109.5      |
| H(8B)-C(8)-H(8C)    | 109.5      |
| C(5)-C(9)-H(9)      | 117.4      |
| C(10)-C(9)-C(5)     | 125.1(2)   |
| C(10)-C(9)-H(9)     | 117.4      |
| C(9)-C(10)-H(10)    | 117.5      |
| C(9)-C(10)-C(11)    | 125.0(2)   |
| C(11)-C(10)-H(10)   | 117.5      |
| O(3)-C(11)-O(4)     | 122.5(2)   |
| O(3)-C(11)-C(10)    | 123.3(2)   |
| O(4)-C(11)-C(10)    | 114.1(2)   |
| O(4)-C(12)-H(12A)   | 109.5      |
| O(4)-C(12)-H(12B)   | 109.5      |
| O(4)-C(12)-H(12C)   | 109.5      |
| H(12A)-C(12)-H(12B) | 109.5      |
| H(12A)-C(12)-H(12C) | 109.5      |
| H(12B)-C(12)-H(12C) | 109.5      |
| C(6)-C(13)-H(13)    | 115.7      |
| C(14)-C(13)-C(6)    | 128.6(2)   |

|                     |            |
|---------------------|------------|
| C(14)-C(13)-H(13)   | 115.7      |
| C(13)-C(14)-H(14)   | 117.0      |
| C(13)-C(14)-C(15)   | 125.9(2)   |
| C(15)-C(14)-H(14)   | 117.0      |
| C(16)-C(15)-C(14)   | 119.1(2)   |
| C(16)-C(15)-C(20)   | 117.7(2)   |
| C(20)-C(15)-C(14)   | 123.08(19) |
| C(15)-C(16)-H(16)   | 119.4      |
| C(15)-C(16)-C(17)   | 121.3(2)   |
| C(17)-C(16)-H(16)   | 119.4      |
| C(16)-C(17)-H(17)   | 119.8      |
| C(18)-C(17)-C(16)   | 120.4(2)   |
| C(18)-C(17)-H(17)   | 119.8      |
| O(5)-C(18)-C(17)    | 125.69(19) |
| O(5)-C(18)-C(19)    | 115.36(18) |
| C(17)-C(18)-C(19)   | 118.9(2)   |
| O(6)-C(19)-C(18)    | 114.29(19) |
| O(6)-C(19)-C(20)    | 125.42(19) |
| C(20)-C(19)-C(18)   | 120.3(2)   |
| C(15)-C(20)-H(20)   | 119.4      |
| C(19)-C(20)-C(15)   | 121.18(19) |
| C(19)-C(20)-H(20)   | 119.4      |
| O(6)-C(21)-H(21A)   | 109.5      |
| O(6)-C(21)-H(21B)   | 109.5      |
| O(6)-C(21)-H(21C)   | 109.5      |
| H(21A)-C(21)-H(21B) | 109.5      |
| H(21A)-C(21)-H(21C) | 109.5      |
| H(21B)-C(21)-H(21C) | 109.5      |
| O(5)-C(22)-H(22A)   | 109.5      |
| O(5)-C(22)-H(22B)   | 109.5      |
| O(5)-C(22)-H(22C)   | 109.5      |
| H(22A)-C(22)-H(22B) | 109.5      |
| H(22A)-C(22)-H(22C) | 109.5      |
| H(22B)-C(22)-H(22C) | 109.5      |

---

Symmetry transformations used to generate equivalent atoms:

**Table S61.** Anisotropic displacement parameters ( $\text{\AA}^2 \times 10^3$ ) for **22**. The anisotropic displacement factor exponent takes the form:  $-2h^2 [h^2 a^{*2} U^{11} + \dots + 2hk a^* b^* U^{12}]$

|       | U <sup>11</sup> | U <sup>22</sup> | U <sup>33</sup> | U <sup>23</sup> | U <sup>13</sup> | U <sup>12</sup> |
|-------|-----------------|-----------------|-----------------|-----------------|-----------------|-----------------|
| O(1)  | 16(1)           | 33(1)           | 21(1)           | 8(1)            | 8(1)            | 2(1)            |
| O(2)  | 16(1)           | 23(1)           | 22(1)           | -1(1)           | 13(1)           | -1(1)           |
| O(3)  | 21(1)           | 54(1)           | 34(1)           | 11(1)           | 12(1)           | -10(1)          |
| O(4)  | 18(1)           | 43(1)           | 21(1)           | 11(1)           | 7(1)            | -2(1)           |
| O(5)  | 12(1)           | 24(1)           | 19(1)           | 4(1)            | 5(1)            | 2(1)            |
| O(6)  | 15(1)           | 26(1)           | 20(1)           | 5(1)            | 9(1)            | 0(1)            |
| C(1)  | 18(1)           | 38(1)           | 26(1)           | 13(1)           | 6(1)            | 5(1)            |
| C(2)  | 18(1)           | 21(1)           | 14(1)           | 1(1)            | 7(1)            | -1(1)           |
| C(3)  | 11(1)           | 26(1)           | 22(1)           | 0(1)            | 4(1)            | 3(1)            |
| C(4)  | 15(1)           | 28(1)           | 22(1)           | 2(1)            | 14(1)           | 1(1)            |
| C(5)  | 16(1)           | 18(1)           | 16(1)           | -2(1)           | 8(1)            | 1(1)            |
| C(6)  | 13(1)           | 16(1)           | 18(1)           | -4(1)           | 7(1)            | 0(1)            |
| C(7)  | 11(1)           | 18(1)           | 19(1)           | -3(1)           | 9(1)            | -4(1)           |
| C(8)  | 28(2)           | 33(1)           | 31(1)           | -7(1)           | 21(1)           | -1(1)           |
| C(9)  | 14(1)           | 23(1)           | 20(1)           | -1(1)           | 8(1)            | 5(1)            |
| C(10) | 17(1)           | 31(1)           | 22(1)           | 3(1)            | 5(1)            | 0(1)            |
| C(11) | 19(1)           | 27(1)           | 24(1)           | -1(1)           | 10(1)           | -1(1)           |
| C(12) | 28(2)           | 47(2)           | 25(1)           | 17(1)           | 12(1)           | 2(1)            |
| C(13) | 13(1)           | 21(1)           | 18(1)           | -5(1)           | 10(1)           | -3(1)           |
| C(14) | 13(1)           | 19(1)           | 16(1)           | -5(1)           | 8(1)            | -2(1)           |
| C(15) | 14(1)           | 16(1)           | 15(1)           | -4(1)           | 7(1)            | 1(1)            |
| C(16) | 19(1)           | 16(1)           | 18(1)           | -3(1)           | 11(1)           | -1(1)           |
| C(17) | 19(1)           | 16(1)           | 16(1)           | 3(1)            | 9(1)            | 1(1)            |
| C(18) | 14(1)           | 18(1)           | 13(1)           | -2(1)           | 6(1)            | 4(1)            |
| C(19) | 15(1)           | 15(1)           | 18(1)           | -3(1)           | 11(1)           | -2(1)           |
| C(20) | 19(1)           | 16(1)           | 13(1)           | 0(1)            | 7(1)            | 2(1)            |
| C(21) | 19(1)           | 26(1)           | 21(1)           | 3(1)            | 10(1)           | -3(1)           |
| C(22) | 21(1)           | 23(1)           | 21(1)           | 4(1)            | 5(1)            | 4(1)            |

**Table S62.** Hydrogen coordinates ( $\times 10^4$ ) and isotropic displacement parameters ( $\text{\AA}^2 \times 10^3$ ) for **22**.

|        | x    | y     | z    | U(eq) |
|--------|------|-------|------|-------|
| H(1A)  | 556  | 13911 | 2906 | 42    |
| H(1B)  | 415  | 14478 | 3538 | 42    |
| H(1C)  | 155  | 11444 | 3183 | 42    |
| H(3)   | 256  | 10562 | 4169 | 24    |
| H(4)   | 494  | 8128  | 5085 | 24    |
| H(8A)  | 2101 | 7395  | 3435 | 42    |
| H(8B)  | 2648 | 5511  | 3963 | 42    |
| H(8C)  | 2963 | 7827  | 3586 | 42    |
| H(9)   | 2168 | 6209  | 6117 | 22    |
| H(10)  | 715  | 4429  | 5728 | 28    |
| H(12A) | 1983 | -435  | 7431 | 49    |
| H(12B) | 1890 | 2578  | 7761 | 49    |
| H(12C) | 2676 | 1627  | 7725 | 49    |
| H(13)  | 3273 | 8318  | 5224 | 19    |
| H(14)  | 2825 | 3252  | 5673 | 19    |
| H(16)  | 3732 | 845   | 6490 | 20    |
| H(17)  | 4929 | 205   | 7110 | 20    |
| H(20)  | 4424 | 7035  | 5531 | 18    |
| H(21A) | 5468 | 7186  | 5255 | 32    |
| H(21B) | 6189 | 9046  | 5578 | 32    |
| H(21C) | 5417 | 10113 | 5626 | 32    |
| H(22A) | 6166 | -966  | 7367 | 33    |
| H(22B) | 6000 | 1515  | 7797 | 33    |
| H(22C) | 6804 | 1184  | 7742 | 33    |

Experimental Summary for Crystal **Pd-1** (CCDC 1905654)

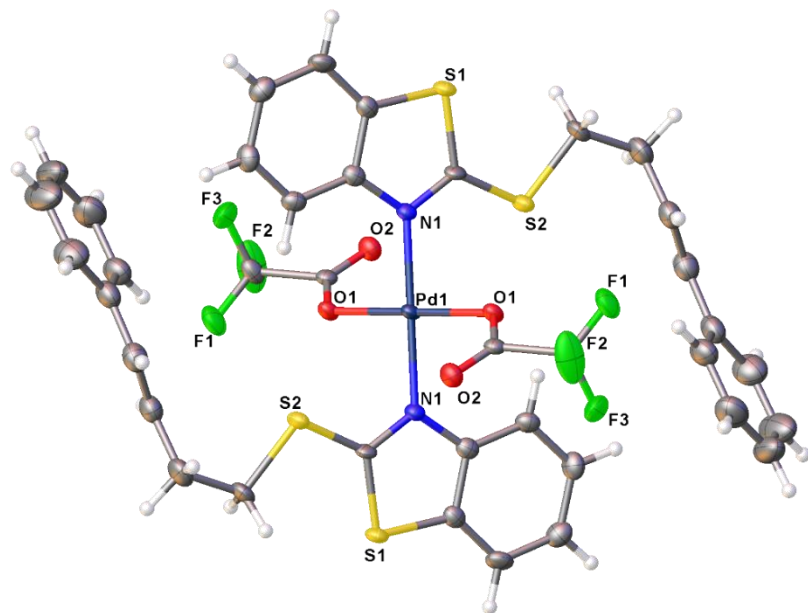

**Table S63.** Crystal data and structure refinement for **Pd-1**.

|                                   |                                                                                                |                 |
|-----------------------------------|------------------------------------------------------------------------------------------------|-----------------|
| Empirical formula                 | C <sub>38</sub> H <sub>30</sub> F <sub>6</sub> N <sub>2</sub> O <sub>4</sub> Pd S <sub>4</sub> |                 |
| Formula weight                    | 927.28                                                                                         |                 |
| Temperature                       | 100.0 K                                                                                        |                 |
| Wavelength                        | 0.71073 Å                                                                                      |                 |
| Crystal system                    | Monoclinic                                                                                     |                 |
| Space group                       | C 2/c                                                                                          |                 |
| Unit cell dimensions              | a = 15.3360(10) Å                                                                              | ∠ = 90°.        |
|                                   | b = 10.1947(7) Å                                                                               | ∠ = 98.408(2)°. |
|                                   | c = 24.0955(13) Å                                                                              | ∠ = 90°.        |
| Volume                            | 3726.7(4) Å <sup>3</sup>                                                                       |                 |
| Z                                 | 4                                                                                              |                 |
| Density (calculated)              | 1.653 Mg/m <sup>3</sup>                                                                        |                 |
| Absorption coefficient            | 0.797 mm <sup>-1</sup>                                                                         |                 |
| F(000)                            | 1872                                                                                           |                 |
| Crystal size                      | 0.25 x 0.22 x 0.18 mm <sup>3</sup>                                                             |                 |
| Theta range for data collection   | 1.709 to 28.293°.                                                                              |                 |
| Index ranges                      | -16 ≤ h ≤ 20, -13 ≤ k ≤ 11, -32 ≤ l ≤ 32                                                       |                 |
| Reflections collected             | 12876                                                                                          |                 |
| Independent reflections           | 4617 [R(int) = 0.0345]                                                                         |                 |
| Completeness to theta = 25.242°   | 99.9 %                                                                                         |                 |
| Absorption correction             | Semi-empirical from equivalents                                                                |                 |
| Max. and min. transmission        | 0.7457 and 0.6536                                                                              |                 |
| Refinement method                 | Full-matrix least-squares on F <sup>2</sup>                                                    |                 |
| Data / restraints / parameters    | 4617 / 0 / 250                                                                                 |                 |
| Goodness-of-fit on F <sup>2</sup> | 1.361                                                                                          |                 |
| Final R indices [I > 2σ(I)]       | R1 = 0.0674, wR2 = 0.1369                                                                      |                 |
| R indices (all data)              | R1 = 0.0805, wR2 = 0.1418                                                                      |                 |
| Extinction coefficient            | n/a                                                                                            |                 |
| Largest diff. peak and hole       | 1.242 and -1.118 e.Å <sup>-3</sup>                                                             |                 |

**Table S64.** Atomic coordinates ( $\times 10^4$ ) and equivalent isotropic displacement parameters ( $\text{\AA}^2 \times 10^3$ ) for **Pd-1**.  $U(\text{eq})$  is defined as one third of the trace of the orthogonalized  $U^{ij}$  tensor.

|       | x       | y       | z       | $U(\text{eq})$ |
|-------|---------|---------|---------|----------------|
| Pd(1) | 5000    | 5000    | 5000    | 17(1)          |
| S(1)  | 2322(1) | 3299(1) | 4334(1) | 23(1)          |
| S(2)  | 4197(1) | 2485(1) | 4210(1) | 25(1)          |
| F(1)  | 5004(2) | 4500(4) | 6900(1) | 38(1)          |
| O(1)  | 4972(2) | 4637(3) | 5815(1) | 20(1)          |
| O(2)  | 4652(2) | 2470(4) | 5734(1) | 25(1)          |
| N(1)  | 3724(2) | 4453(4) | 4823(2) | 17(1)          |
| F(3)  | 3712(2) | 3795(5) | 6604(2) | 54(1)          |
| F(2)  | 4769(4) | 2432(4) | 6857(2) | 63(1)          |
| C(2)  | 4763(3) | 3509(5) | 5978(2) | 18(1)          |
| C(9)  | 3460(3) | 3501(5) | 4477(2) | 20(1)          |
| C(3)  | 3016(3) | 5087(5) | 5025(2) | 21(1)          |
| C(4)  | 3080(3) | 6079(5) | 5422(2) | 23(1)          |
| C(8)  | 2189(3) | 4605(5) | 4785(2) | 20(1)          |
| C(1)  | 4576(4) | 3566(5) | 6598(2) | 27(1)          |
| C(6)  | 1476(4) | 6135(5) | 5309(2) | 29(1)          |
| C(7)  | 1408(3) | 5140(6) | 4920(2) | 28(1)          |
| C(5)  | 2305(4) | 6598(5) | 5564(2) | 26(1)          |
| C(12) | 4817(4) | 1218(6) | 3228(2) | 33(1)          |
| C(10) | 3470(3) | 1536(6) | 3691(2) | 29(1)          |
| C(13) | 5644(4) | 807(6)  | 3354(2) | 34(1)          |
| C(14) | 6410(4) | 1444(6) | 3180(2) | 35(1)          |
| C(19) | 6415(4) | 2759(6) | 3039(3) | 39(1)          |
| C(11) | 4051(4) | 558(6)  | 3428(3) | 38(1)          |
| C(15) | 7173(4) | 725(8)  | 3153(3) | 50(2)          |
| C(18) | 7147(5) | 3309(8) | 2863(3) | 52(2)          |
| C(17) | 7894(5) | 2574(9) | 2827(4) | 65(2)          |
| C(16) | 7896(5) | 1297(9) | 2975(4) | 71(3)          |



**Table S65.** Bond lengths [Å] and angles [°] for **Pd-1**.

---

|                   |           |
|-------------------|-----------|
| Pd(1)-O(1)#1      | 2.005(3)  |
| Pd(1)-O(1)        | 2.005(3)  |
| Pd(1)-N(1)#1      | 2.020(4)  |
| Pd(1)-N(1)        | 2.020(4)  |
| S(1)-C(9)         | 1.740(5)  |
| S(1)-C(8)         | 1.748(5)  |
| S(2)-C(9)         | 1.726(5)  |
| S(2)-C(10)        | 1.825(5)  |
| F(1)-C(1)         | 1.313(6)  |
| O(1)-C(2)         | 1.271(6)  |
| O(2)-C(2)         | 1.211(6)  |
| N(1)-C(9)         | 1.305(6)  |
| N(1)-C(3)         | 1.410(6)  |
| F(3)-C(1)         | 1.348(7)  |
| F(2)-C(1)         | 1.326(7)  |
| C(2)-C(1)         | 1.565(6)  |
| C(3)-C(4)         | 1.386(7)  |
| C(3)-C(8)         | 1.403(6)  |
| C(4)-C(5)         | 1.389(7)  |
| C(8)-C(7)         | 1.398(7)  |
| C(6)-C(7)         | 1.374(8)  |
| C(6)-C(5)         | 1.410(8)  |
| C(12)-C(13)       | 1.328(8)  |
| C(12)-C(11)       | 1.494(8)  |
| C(10)-C(11)       | 1.535(8)  |
| C(13)-C(14)       | 1.456(9)  |
| C(14)-C(19)       | 1.384(9)  |
| C(14)-C(15)       | 1.390(9)  |
| C(19)-C(18)       | 1.376(9)  |
| C(15)-C(16)       | 1.376(11) |
| C(18)-C(17)       | 1.382(11) |
| C(17)-C(16)       | 1.350(13) |
| O(1)#1-Pd(1)-O(1) | 180.0     |

|                     |           |
|---------------------|-----------|
| O(1)#1-Pd(1)-N(1)   | 90.16(14) |
| O(1)#1-Pd(1)-N(1)#1 | 89.84(14) |
| O(1)-Pd(1)-N(1)     | 89.84(14) |
| O(1)-Pd(1)-N(1)#1   | 90.16(14) |
| N(1)#1-Pd(1)-N(1)   | 180.0     |
| C(9)-S(1)-C(8)      | 89.6(2)   |
| C(9)-S(2)-C(10)     | 101.9(2)  |
| C(2)-O(1)-Pd(1)     | 120.8(3)  |
| C(9)-N(1)-Pd(1)     | 122.7(3)  |
| C(9)-N(1)-C(3)      | 112.3(4)  |
| C(3)-N(1)-Pd(1)     | 124.9(3)  |
| O(1)-C(2)-C(1)      | 110.5(4)  |
| O(2)-C(2)-O(1)      | 131.7(4)  |
| O(2)-C(2)-C(1)      | 117.6(4)  |
| S(2)-C(9)-S(1)      | 123.2(3)  |
| N(1)-C(9)-S(1)      | 115.0(4)  |
| N(1)-C(9)-S(2)      | 121.7(3)  |
| C(4)-C(3)-N(1)      | 126.3(4)  |
| C(4)-C(3)-C(8)      | 120.6(5)  |
| C(8)-C(3)-N(1)      | 113.1(4)  |
| C(3)-C(4)-C(5)      | 118.1(5)  |
| C(3)-C(8)-S(1)      | 110.0(4)  |
| C(7)-C(8)-S(1)      | 128.6(4)  |
| C(7)-C(8)-C(3)      | 121.4(5)  |
| F(1)-C(1)-F(3)      | 106.4(5)  |
| F(1)-C(1)-F(2)      | 108.2(4)  |
| F(1)-C(1)-C(2)      | 114.1(4)  |
| F(3)-C(1)-C(2)      | 109.5(4)  |
| F(2)-C(1)-F(3)      | 107.3(5)  |
| F(2)-C(1)-C(2)      | 111.0(4)  |
| C(7)-C(6)-C(5)      | 121.2(5)  |
| C(6)-C(7)-C(8)      | 117.7(5)  |
| C(4)-C(5)-C(6)      | 121.0(5)  |
| C(13)-C(12)-C(11)   | 123.6(6)  |
| C(11)-C(10)-S(2)    | 107.1(4)  |
| C(12)-C(13)-C(14)   | 125.2(6)  |

|                   |          |
|-------------------|----------|
| C(19)-C(14)-C(13) | 122.5(6) |
| C(19)-C(14)-C(15) | 117.6(6) |
| C(15)-C(14)-C(13) | 119.8(6) |
| C(18)-C(19)-C(14) | 120.3(7) |
| C(12)-C(11)-C(10) | 111.8(5) |
| C(16)-C(15)-C(14) | 120.9(8) |
| C(19)-C(18)-C(17) | 121.3(7) |
| C(16)-C(17)-C(18) | 118.4(7) |
| C(17)-C(16)-C(15) | 121.3(8) |

---

Symmetry transformations used to generate equivalent atoms:

#1 -x+1,-y+1,-z+1

**Table S66.** Anisotropic displacement parameters ( $\text{\AA}^2 \times 10^3$ ) for **Pd-1**. The anisotropic displacement factor exponent takes the form:  $-2h^2 [h^2 a^{*2} U^{11} + \dots + 2hk a^* b^* U^{12}]$

|       | U11    | U22   | U33    | U23    | U13   | U12    |
|-------|--------|-------|--------|--------|-------|--------|
| Pd(1) | 13(1)  | 25(1) | 15(1)  | -3(1)  | 2(1)  | -7(1)  |
| S(1)  | 12(1)  | 31(1) | 24(1)  | -7(1)  | 2(1)  | -7(1)  |
| S(2)  | 15(1)  | 31(1) | 29(1)  | -13(1) | 4(1)  | -6(1)  |
| F(1)  | 42(2)  | 50(2) | 20(2)  | -8(1)  | 1(1)  | -7(2)  |
| O(1)  | 20(2)  | 23(2) | 18(2)  | -2(1)  | 3(1)  | -8(1)  |
| O(2)  | 26(2)  | 24(2) | 26(2)  | -6(2)  | 6(1)  | -1(2)  |
| N(1)  | 12(2)  | 22(2) | 16(2)  | -3(2)  | 2(1)  | -4(2)  |
| F(3)  | 34(2)  | 95(3) | 39(2)  | -23(2) | 25(2) | -21(2) |
| F(2)  | 122(4) | 40(2) | 31(2)  | 10(2)  | 22(2) | 4(2)   |
| C(2)  | 10(2)  | 27(3) | 17(2)  | -3(2)  | 2(2)  | -2(2)  |
| C(9)  | 10(2)  | 31(3) | 17(2)  | 0(2)   | 0(2)  | -4(2)  |
| C(3)  | 19(2)  | 24(2) | 19(2)  | 3(2)   | 3(2)  | -4(2)  |
| C(4)  | 21(2)  | 24(3) | 24(2)  | 2(2)   | 2(2)  | -3(2)  |
| C(8)  | 22(2)  | 20(2) | 18(2)  | 0(2)   | 4(2)  | -3(2)  |
| C(1)  | 33(3)  | 29(3) | 19(2)  | 0(2)   | 4(2)  | -7(2)  |
| C(6)  | 24(3)  | 30(3) | 34(3)  | 2(2)   | 12(2) | 6(2)   |
| C(7)  | 22(2)  | 31(3) | 31(2)  | 0(2)   | 4(2)  | -11(2) |
| C(5)  | 32(3)  | 22(3) | 26(2)  | -3(2)  | 9(2)  | 5(2)   |
| C(12) | 35(3)  | 38(3) | 26(3)  | -9(2)  | 7(2)  | -1(3)  |
| C(10) | 23(3)  | 36(3) | 28(3)  | -14(2) | 2(2)  | -11(2) |
| C(13) | 37(3)  | 35(3) | 30(3)  | -5(2)  | 4(2)  | 2(3)   |
| C(14) | 33(3)  | 39(3) | 33(3)  | -12(3) | 3(2)  | 1(3)   |
| C(19) | 34(3)  | 37(4) | 45(3)  | -11(3) | 6(3)  | -4(3)  |
| C(11) | 38(3)  | 40(3) | 38(3)  | -17(3) | 9(3)  | -11(3) |
| C(15) | 35(4)  | 53(4) | 61(4)  | -6(4)  | 2(3)  | 8(3)   |
| C(18) | 55(4)  | 45(4) | 57(4)  | -9(3)  | 13(3) | -17(4) |
| C(17) | 43(4)  | 73(6) | 84(6)  | -43(5) | 30(4) | -21(4) |
| C(16) | 36(4)  | 72(6) | 106(7) | -40(5) | 18(4) | -1(4)  |

**Table S67.** Hydrogen coordinates ( $\times 10^4$ ) and isotropic displacement parameters ( $\text{\AA}^2 \times 10^3$ ) for **Pd-1**.

|        | x    | y    | z    | U(eq) |
|--------|------|------|------|-------|
| H(4)   | 3639 | 6394 | 5593 | 28    |
| H(6)   | 955  | 6519 | 5407 | 34    |
| H(7)   | 849  | 4826 | 4750 | 33    |
| H(5)   | 2333 | 7275 | 5837 | 31    |
| H(12)  | 4706 | 1974 | 2998 | 40    |
| H(10A) | 3024 | 1064 | 3873 | 35    |
| H(10B) | 3160 | 2124 | 3400 | 35    |
| H(13)  | 5744 | 35   | 3575 | 41    |
| H(19)  | 5911 | 3286 | 3063 | 46    |
| H(11A) | 4270 | -119 | 3708 | 46    |
| H(11B) | 3691 | 113  | 3107 | 46    |
| H(15)  | 7195 | -173 | 3260 | 60    |
| H(18)  | 7139 | 4211 | 2764 | 62    |
| H(17)  | 8394 | 2957 | 2700 | 78    |
| H(16)  | 8407 | 782  | 2957 | 85    |

Experimental Summary for Crystal **Pd-2** (CCDC 1905655)

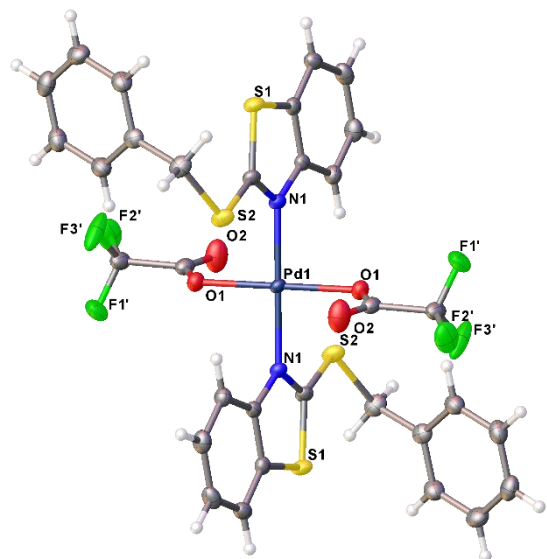

**Table S68.** Crystal data and structure refinement for **Pd-2**.

|                                   |                                                                                                                |                 |
|-----------------------------------|----------------------------------------------------------------------------------------------------------------|-----------------|
| Empirical formula                 | C <sub>34</sub> H <sub>26</sub> Cl <sub>2</sub> F <sub>6</sub> N <sub>2</sub> O <sub>4</sub> Pd S <sub>4</sub> |                 |
| Formula weight                    | 946.11                                                                                                         |                 |
| Temperature                       | 100.0 K                                                                                                        |                 |
| Wavelength                        | 0.71073 Å                                                                                                      |                 |
| Crystal system                    | Triclinic                                                                                                      |                 |
| Space group                       | P-1                                                                                                            |                 |
| Unit cell dimensions              | a = 9.0381(9) Å                                                                                                | ∠ = 68.768(3)°. |
|                                   | b = 10.3207(12) Å                                                                                              | ∠ = 89.673(5)°. |
|                                   | c = 10.3832(11) Å                                                                                              | ∠ = 88.327(3)°. |
| Volume                            | 902.40(17) Å <sup>3</sup>                                                                                      |                 |
| Z                                 | 1                                                                                                              |                 |
| Density (calculated)              | 1.741 Mg/m <sup>3</sup>                                                                                        |                 |
| Absorption coefficient            | 0.967 mm <sup>-1</sup>                                                                                         |                 |
| F(000)                            | 474                                                                                                            |                 |
| Crystal size                      | 0.30 x 0.29 x 0.28 mm <sup>3</sup>                                                                             |                 |
| Theta range for data collection   | 2.104 to 28.308°.                                                                                              |                 |
| Index ranges                      | -12 ≤ h ≤ 12, -13 ≤ k ≤ 13, -13 ≤ l ≤ 13                                                                       |                 |
| Reflections collected             | 10713                                                                                                          |                 |
| Independent reflections           | 4397 [R(int) = 0.0384]                                                                                         |                 |
| Completeness to theta = 25.242°   | 99.4 %                                                                                                         |                 |
| Absorption correction             | Semi-empirical from equivalents                                                                                |                 |
| Max. and min. transmission        | 0.7457 and 0.6793                                                                                              |                 |
| Refinement method                 | Full-matrix least-squares on F <sup>2</sup>                                                                    |                 |
| Data / restraints / parameters    | 4397 / 15 / 269                                                                                                |                 |
| Goodness-of-fit on F <sup>2</sup> | 1.052                                                                                                          |                 |
| Final R indices [I > 2σ(I)]       | R1 = 0.0317, wR2 = 0.0773                                                                                      |                 |
| R indices (all data)              | R1 = 0.0369, wR2 = 0.0825                                                                                      |                 |
| Extinction coefficient            | n/a                                                                                                            |                 |
| Largest diff. peak and hole       | 1.071 and -0.431 e.Å <sup>-3</sup>                                                                             |                 |

**Table S69.** Atomic coordinates ( $\times 10^4$ ) and equivalent isotropic displacement parameters ( $\text{\AA}^2 \times 10^3$ ) for **Pd-2**.  $U(\text{eq})$  is defined as one third of the trace of the orthogonalized  $U^{ij}$  tensor.

|       | x       | y        | z        | $U(\text{eq})$ |
|-------|---------|----------|----------|----------------|
| Pd(1) | 5000    | 5000     | 5000     | 15(1)          |
| S(1)  | 4956(1) | 2545(1)  | 2169(1)  | 21(1)          |
| S(2)  | 3748(1) | 5452(1)  | 1865(1)  | 24(1)          |
| Cl(1) | 7101(1) | 981(1)   | 9776(1)  | 35(1)          |
| O(1)  | 2887(2) | 4436(2)  | 5369(2)  | 22(1)          |
| N(1)  | 5258(2) | 3679(2)  | 3981(2)  | 17(1)          |
| F(2') | 846(3)  | 1627(3)  | 7388(4)  | 48(1)          |
| F(3') | 461(3)  | 2996(4)  | 5329(2)  | 57(2)          |
| F(1') | 242(3)  | 3700(3)  | 7025(4)  | 47(1)          |
| O(2)  | 3546(2) | 2537(2)  | 7209(2)  | 42(1)          |
| C(6)  | 5991(2) | 1635(2)  | 3639(2)  | 18(1)          |
| C(1)  | 6047(2) | 2407(2)  | 4501(2)  | 17(1)          |
| C(8)  | 1700(3) | 3918(2)  | 983(2)   | 22(1)          |
| C(15) | 1016(3) | 2929(2)  | 6499(2)  | 26(1)          |
| C(5)  | 6675(3) | 323(2)   | 4006(3)  | 23(1)          |
| C(19) | 4654(3) | 3891(2)  | 2774(2)  | 18(1)          |
| C(2)  | 6822(3) | 1893(2)  | 5747(2)  | 21(1)          |
| C(9)  | 777(3)  | 3742(3)  | 2105(3)  | 26(1)          |
| C(13) | 1573(3) | 3041(3)  | 247(3)   | 26(1)          |
| C(14) | 2669(3) | 3309(3)  | 6386(2)  | 22(1)          |
| C(11) | -367(3) | 1831(3)  | 1748(3)  | 30(1)          |
| C(10) | -256(3) | 2701(3)  | 2478(3)  | 28(1)          |
| C(3)  | 7519(3) | 604(3)   | 6102(3)  | 26(1)          |
| C(20) | 5597(3) | 23(3)    | 9501(3)  | 35(1)          |
| C(12) | 547(3)  | 2000(3)  | 625(3)   | 30(1)          |
| C(4)  | 7452(3) | -169(3)  | 5244(3)  | 26(1)          |
| C(7)  | 2807(3) | 5060(3)  | 509(2)   | 26(1)          |
| F(3)  | 806(15) | 1765(15) | 6340(30) | 72(10)         |
| F(1)  | 96(12)  | 3901(17) | 5670(30) | 99(14)         |
| F(2)  | 300(20) | 2760(40) | 7624(18) | 117(16)        |

**Table S70.** Bond lengths [Å] and angles [°] for **Pd-2**.

---

|              |            |
|--------------|------------|
| Pd(1)-O(1)#1 | 2.0065(16) |
| Pd(1)-O(1)   | 2.0065(16) |
| Pd(1)-N(1)#1 | 2.0142(18) |
| Pd(1)-N(1)   | 2.0142(18) |
| S(1)-C(6)    | 1.736(2)   |
| S(1)-C(19)   | 1.734(2)   |
| S(2)-C(19)   | 1.728(2)   |
| S(2)-C(7)    | 1.820(2)   |
| Cl(1)-C(20)  | 1.787(3)   |
| O(1)-C(14)   | 1.276(3)   |
| N(1)-C(1)    | 1.400(3)   |
| N(1)-C(19)   | 1.311(3)   |
| F(2')-C(15)  | 1.340(3)   |
| F(3')-C(15)  | 1.295(3)   |
| F(1')-C(15)  | 1.304(3)   |
| O(2)-C(14)   | 1.213(3)   |
| C(6)-C(1)    | 1.399(3)   |
| C(6)-C(5)    | 1.392(3)   |
| C(1)-C(2)    | 1.392(3)   |
| C(8)-C(9)    | 1.389(4)   |
| C(8)-C(13)   | 1.387(3)   |
| C(8)-C(7)    | 1.509(4)   |
| C(15)-C(14)  | 1.549(3)   |
| C(15)-F(3)   | 1.288(7)   |
| C(15)-F(1)   | 1.330(7)   |
| C(15)-F(2)   | 1.288(7)   |
| C(5)-H(5)    | 0.9500     |
| C(5)-C(4)    | 1.386(4)   |
| C(2)-H(2)    | 0.9500     |
| C(2)-C(3)    | 1.379(3)   |
| C(9)-H(9)    | 0.9500     |
| C(9)-C(10)   | 1.390(4)   |
| C(13)-H(13)  | 0.9500     |
| C(13)-C(12)  | 1.385(4)   |



|               |          |
|---------------|----------|
| C(11)-H(11)   | 0.9500   |
| C(11)-C(10)   | 1.375(4) |
| C(11)-C(12)   | 1.386(4) |
| C(10)-H(10)   | 0.9500   |
| C(3)-H(3)     | 0.9500   |
| C(3)-C(4)     | 1.398(4) |
| C(20)-C(20)#2 | 1.480(6) |
| C(20)-H(20A)  | 0.9900   |
| C(20)-H(20B)  | 0.9900   |
| C(12)-H(12)   | 0.9500   |
| C(4)-H(4)     | 0.9500   |
| C(7)-H(7A)    | 0.9900   |
| C(7)-H(7B)    | 0.9900   |

|                     |            |
|---------------------|------------|
| O(1)#1-Pd(1)-O(1)   | 180.0      |
| O(1)#1-Pd(1)-N(1)   | 90.86(7)   |
| O(1)-Pd(1)-N(1)     | 89.14(7)   |
| O(1)#1-Pd(1)-N(1)#1 | 89.14(7)   |
| O(1)-Pd(1)-N(1)#1   | 90.86(7)   |
| N(1)-Pd(1)-N(1)#1   | 180.00(7)  |
| C(19)-S(1)-C(6)     | 90.03(11)  |
| C(19)-S(2)-C(7)     | 102.35(11) |
| C(14)-O(1)-Pd(1)    | 116.19(15) |
| C(1)-N(1)-Pd(1)     | 124.09(15) |
| C(19)-N(1)-Pd(1)    | 123.57(16) |
| C(19)-N(1)-C(1)     | 112.29(19) |
| C(1)-C(6)-S(1)      | 109.85(17) |
| C(5)-C(6)-S(1)      | 128.55(19) |
| C(5)-C(6)-C(1)      | 121.6(2)   |
| C(6)-C(1)-N(1)      | 113.42(19) |
| C(2)-C(1)-N(1)      | 126.0(2)   |
| C(2)-C(1)-C(6)      | 120.6(2)   |
| C(9)-C(8)-C(7)      | 122.2(2)   |
| C(13)-C(8)-C(9)     | 119.1(2)   |
| C(13)-C(8)-C(7)     | 118.7(2)   |
| F(2')-C(15)-C(14)   | 110.6(2)   |

|                   |            |
|-------------------|------------|
| F(3')-C(15)-F(2') | 106.9(3)   |
| F(3')-C(15)-F(1') | 111.0(3)   |
| F(3')-C(15)-C(14) | 112.5(2)   |
| F(1')-C(15)-F(2') | 104.5(2)   |
| F(1')-C(15)-C(14) | 110.9(2)   |
| F(3)-C(15)-C(14)  | 112.5(7)   |
| F(3)-C(15)-F(1)   | 109.4(14)  |
| F(3)-C(15)-F(2)   | 101.6(16)  |
| F(1)-C(15)-C(14)  | 115.5(6)   |
| F(2)-C(15)-C(14)  | 120.0(8)   |
| F(2)-C(15)-F(1)   | 96.0(16)   |
| C(6)-C(5)-H(5)    | 121.4      |
| C(4)-C(5)-C(6)    | 117.1(2)   |
| C(4)-C(5)-H(5)    | 121.4      |
| S(2)-C(19)-S(1)   | 124.82(13) |
| N(1)-C(19)-S(1)   | 114.40(17) |
| N(1)-C(19)-S(2)   | 120.65(17) |
| C(1)-C(2)-H(2)    | 121.0      |
| C(3)-C(2)-C(1)    | 117.9(2)   |
| C(3)-C(2)-H(2)    | 121.0      |
| C(8)-C(9)-H(9)    | 119.9      |
| C(8)-C(9)-C(10)   | 120.2(2)   |
| C(10)-C(9)-H(9)   | 119.9      |
| C(8)-C(13)-H(13)  | 119.7      |
| C(12)-C(13)-C(8)  | 120.7(2)   |
| C(12)-C(13)-H(13) | 119.7      |
| O(1)-C(14)-C(15)  | 111.3(2)   |
| O(2)-C(14)-O(1)   | 129.8(2)   |
| O(2)-C(14)-C(15)  | 118.9(2)   |
| C(10)-C(11)-H(11) | 120.1      |
| C(10)-C(11)-C(12) | 119.9(3)   |
| C(12)-C(11)-H(11) | 120.1      |
| C(9)-C(10)-H(10)  | 119.8      |
| C(11)-C(10)-C(9)  | 120.4(2)   |
| C(11)-C(10)-H(10) | 119.8      |
| C(2)-C(3)-H(3)    | 119.3      |

|                      |            |
|----------------------|------------|
| C(2)-C(3)-C(4)       | 121.4(2)   |
| C(4)-C(3)-H(3)       | 119.3      |
| Cl(1)-C(20)-H(20A)   | 109.8      |
| Cl(1)-C(20)-H(20B)   | 109.8      |
| C(20)#2-C(20)-Cl(1)  | 109.4(3)   |
| C(20)#2-C(20)-H(20A) | 109.8      |
| C(20)#2-C(20)-H(20B) | 109.8      |
| H(20A)-C(20)-H(20B)  | 108.2      |
| C(13)-C(12)-C(11)    | 119.9(2)   |
| C(13)-C(12)-H(12)    | 120.1      |
| C(11)-C(12)-H(12)    | 120.1      |
| C(5)-C(4)-C(3)       | 121.4(2)   |
| C(5)-C(4)-H(4)       | 119.3      |
| C(3)-C(4)-H(4)       | 119.3      |
| S(2)-C(7)-H(7A)      | 108.3      |
| S(2)-C(7)-H(7B)      | 108.3      |
| C(8)-C(7)-S(2)       | 116.12(17) |
| C(8)-C(7)-H(7A)      | 108.3      |
| C(8)-C(7)-H(7B)      | 108.3      |
| H(7A)-C(7)-H(7B)     | 107.4      |

---

Symmetry transformations used to generate equivalent atoms:

#1  $-x+1, -y+1, -z+1$  #2  $-x+1, -y, -z+2$

**Table S71.** Anisotropic displacement parameters ( $\text{\AA}^2 \times 10^3$ ) for **Pd-2**. The anisotropic displacement factor exponent takes the form:  $-2h^2 [h^2 a^{*2} U^{11} + \dots + 2hk a^* b^* U^{12}]$

|       | U11    | U22     | U33     | U23     | U13    | U12      |
|-------|--------|---------|---------|---------|--------|----------|
| Pd(1) | 17(1)  | 13(1)   | 17(1)   | -6(1)   | -1(1)  | -2(1)    |
| S(1)  | 28(1)  | 16(1)   | 18(1)   | -8(1)   | -3(1)  | -1(1)    |
| S(2)  | 34(1)  | 14(1)   | 23(1)   | -5(1)   | -8(1)  | 2(1)     |
| Cl(1) | 33(1)  | 28(1)   | 44(1)   | -12(1)  | -11(1) | -1(1)    |
| O(1)  | 19(1)  | 20(1)   | 26(1)   | -8(1)   | 0(1)   | -3(1)    |
| N(1)  | 19(1)  | 14(1)   | 18(1)   | -6(1)   | -1(1)  | -2(1)    |
| F(2') | 36(1)  | 32(1)   | 64(2)   | -3(1)   | 12(1)  | -11(1)   |
| F(3') | 40(2)  | 106(4)  | 28(1)   | -27(2)  | 7(1)   | -44(2)   |
| F(1') | 29(1)  | 49(2)   | 77(3)   | -41(2)  | 14(1)  | 1(1)     |
| O(2)  | 33(1)  | 40(1)   | 38(1)   | 5(1)    | -2(1)  | -7(1)    |
| C(6)  | 16(1)  | 18(1)   | 21(1)   | -6(1)   | 2(1)   | -3(1)    |
| C(1)  | 15(1)  | 15(1)   | 21(1)   | -6(1)   | 2(1)   | -2(1)    |
| C(8)  | 24(1)  | 21(1)   | 17(1)   | -4(1)   | -7(1)  | 3(1)     |
| C(15) | 26(1)  | 26(1)   | 29(1)   | -14(1)  | 9(1)   | -6(1)    |
| C(5)  | 22(1)  | 18(1)   | 28(1)   | -10(1)  | 5(1)   | -2(1)    |
| C(19) | 21(1)  | 12(1)   | 21(1)   | -6(1)   | 1(1)   | -3(1)    |
| C(2)  | 19(1)  | 23(1)   | 22(1)   | -8(1)   | -1(1)  | -1(1)    |
| C(9)  | 25(1)  | 30(1)   | 25(1)   | -13(1)  | -2(1)  | 3(1)     |
| C(13) | 26(1)  | 33(1)   | 20(1)   | -12(1)  | -1(1)  | 1(1)     |
| C(14) | 25(1)  | 23(1)   | 22(1)   | -12(1)  | 4(1)   | -5(1)    |
| C(11) | 23(1)  | 31(1)   | 30(1)   | -5(1)   | -7(1)  | -3(1)    |
| C(10) | 21(1)  | 38(1)   | 25(1)   | -10(1)  | 0(1)   | 1(1)     |
| C(3)  | 22(1)  | 26(1)   | 25(1)   | -3(1)   | -4(1)  | 1(1)     |
| C(20) | 35(2)  | 42(2)   | 36(2)   | -23(1)  | -7(1)  | -5(1)    |
| C(12) | 32(1)  | 32(1)   | 28(1)   | -16(1)  | -6(1)  | 0(1)     |
| C(4)  | 22(1)  | 19(1)   | 32(1)   | -2(1)   | 2(1)   | 4(1)     |
| C(7)  | 32(1)  | 25(1)   | 17(1)   | -3(1)   | -6(1)  | -2(1)    |
| F(3)  | 37(7)  | 51(11)  | 160(30) | -70(17) | 2(10)  | -4(6)    |
| F(1)  | 12(6)  | 41(10)  | 180(30) | 42(13)  | 0(9)   | -2(5)    |
| F(2)  | 85(15) | 240(40) | 40(10)  | -63(17) | 35(10) | -100(20) |

**Table S72.** Hydrogen coordinates ( $\times 10^4$ ) and isotropic displacement parameters ( $\text{\AA}^2 \times 10^3$ ) for **Pd-2**.

|        | x     | y     | z    | U(eq) |
|--------|-------|-------|------|-------|
| H(5)   | 6611  | -211  | 3432 | 27    |
| H(2)   | 6870  | 2414  | 6335 | 26    |
| H(9)   | 852   | 4336  | 2617 | 31    |
| H(13)  | 2195  | 3157  | -525 | 31    |
| H(11)  | -1069 | 1115  | 2012 | 35    |
| H(10)  | -889  | 2589  | 3242 | 34    |
| H(3)   | 8055  | 233   | 6948 | 31    |
| H(20A) | 5215  | 474   | 8546 | 42    |
| H(20B) | 5942  | -934  | 9626 | 42    |
| H(12)  | 470   | 1403  | 116  | 36    |
| H(4)   | 7951  | -1051 | 5514 | 32    |
| H(7A)  | 2289  | 5919  | -103 | 31    |
| H(7B)  | 3566  | 4801  | -54  | 31    |

# CYCLIC VOLTAMMETRY

## A. General Procedure

Solutions of 2-(butylthio)benzothiazole, 2-(but-3-en-1-ylthio)benzothiazole, (*E*)-2-((4-phenylbut-3-en-1-yl)thio)benzothiazole, and (*E*)-2-((4-phenylbut-3-en-1-yl)sulfonyl)benzothiazole—which was tested after an oxidation method was developed—were prepared in acetonitrile at 0.05M with tetrabutylammonium tetrafluoroborate present as an electrolyte at 0.1M. These solutions were each placed on an ElectroSyn 2.0 by IKA and run on the Cyclic Voltammetry setting with 2 segments, an initial and final voltage of 0V, an overall direction of 0, an upper voltage of 25V, a final voltage of 0V, and a sweep rate of 200 mv/s.

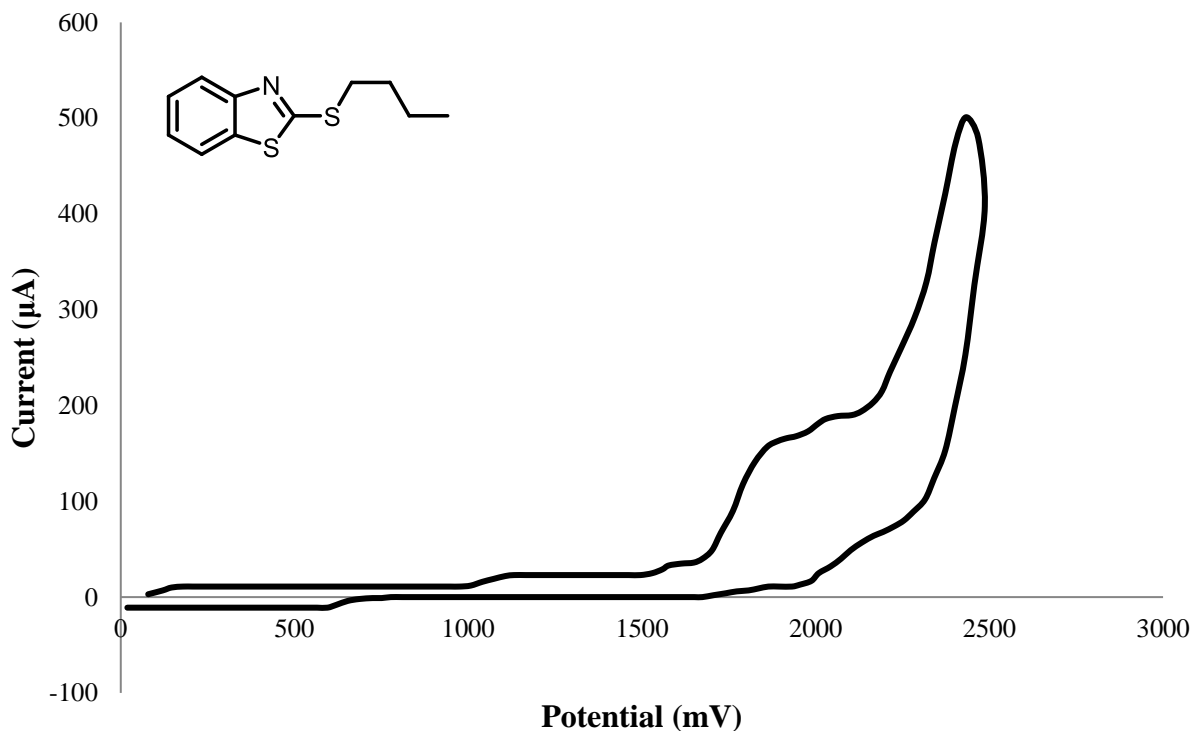

**Figure S20.** Cyclic voltammetry data for 2-(butylthio)benzothiazole.

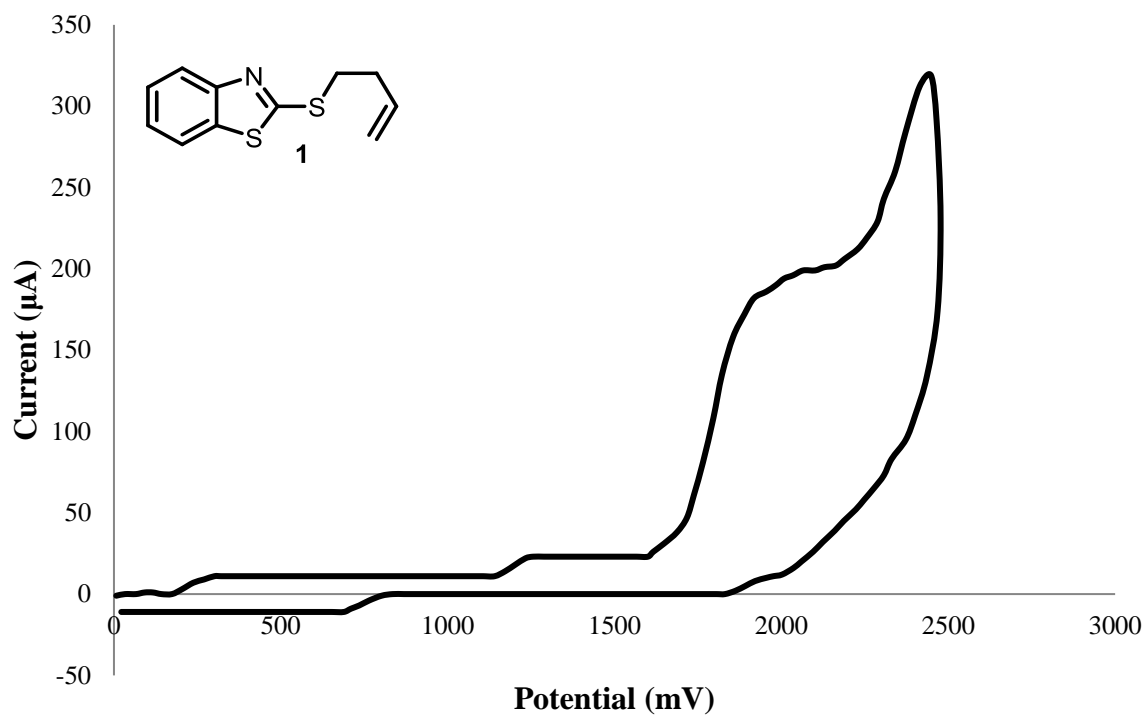

**Figure S21.** Cyclic voltammety data for 2-(but-3-en-1-ylthio)benzothiazole.

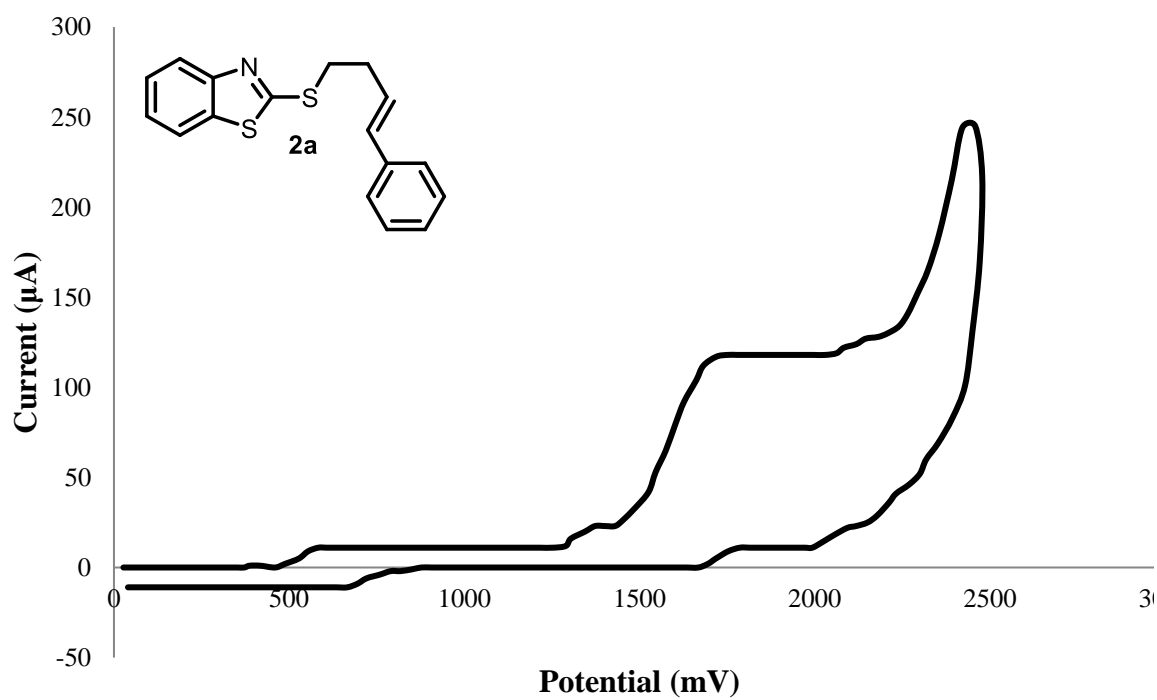

**Figure S22.** Cyclic voltammety data for (*E*)-2-((4-phenylbut-3-en-1-yl)thio)benzothiazole.

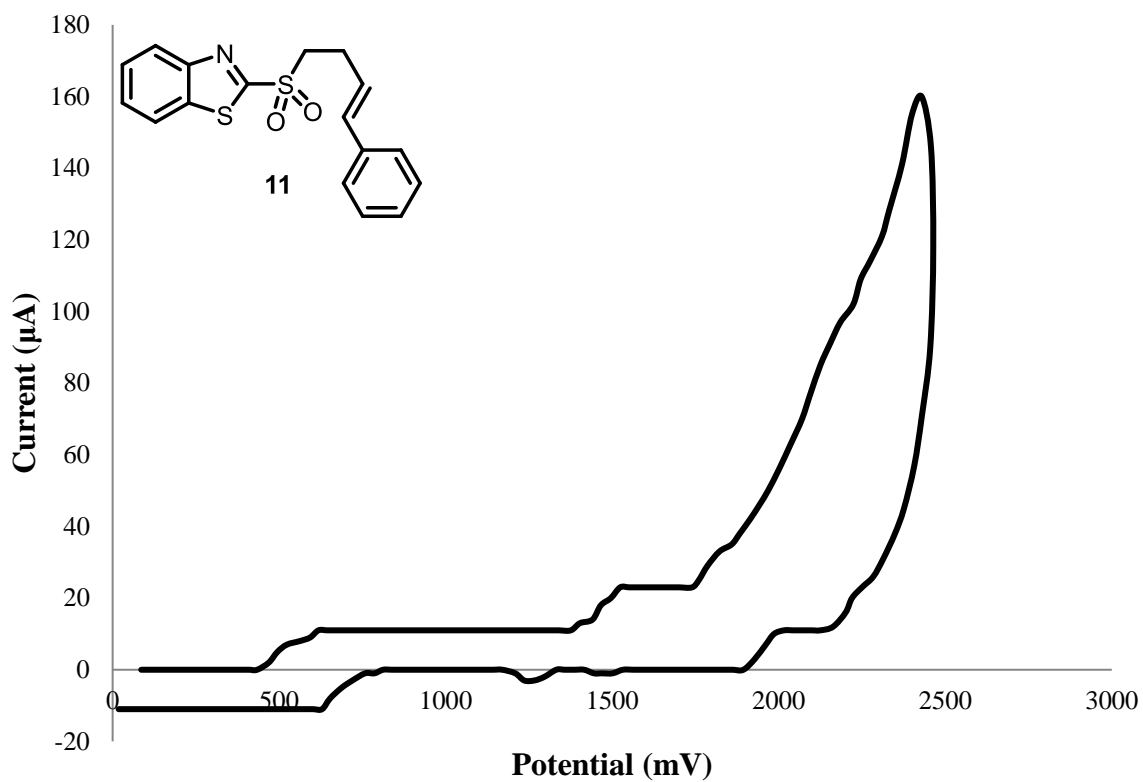

**Figure S23.** Cyclic voltammety data for (*E*)-2-((4-phenylbut-3-en-1-yl)sulfonyl)benzothiazole.



## REFERENCES

1. Keitz, B. K.; Endo, K.; Patel, P. R.; Herbert, M. B.; Grubbs, R. H.; Improved Ruthenium Catalysts for Z-Selective Olefin Metathesis. *J. Am. Chem. Soc.* **2012**, *134*, 693–699.
2. Chong J. A.; Fanger, C.; Larsen G. R.; Lumma W. C.; Moran, M. M.; Ripka, A.; Underwood, D. J.; Weigele, M.; Zhen X.; Mahadevan, A.; Meltzer P.; Compounds for modulating trpv3 function. U.S. Patent Publication US2015/0299225 A1, Oct. 22, 2015.
3. Hilton M. J.; Xu L.; Norrby, P.; Wu, Y.; Wiest O.; Sigman M. S.; Investigating the Nature of Palladium Chain-Walking in the Enantioselective Redox-Relay Heck Reaction of Alkenyl Alcohols. *J. Org. Chem.* **2014**, *79*, 24, 11841–11850
4. Coulter, M. M.; Kou, K. G. M.; Galligan, B.; Dong, V. M.; Regio- and Enantioselective Intermolecular Hydroacylation: Substrate-Directed Addition of Salicylaldehydes to Homoallylic Sulfides. *J. Am. Chem. Soc.* **2010**, *132*, 16330–16333.
5. Luo, S.-X.; Cannon, J. S.; Taylor, B. L. H.; Engle, K. M.; Houk, K. N.; Grubbs, R. H.; Z-Selective Cross-Metathesis and Homodimerization of 3E-1,3-Dienes: Reaction Optimization, Computational Analysis, and Synthetic Applications. *J. Am. Chem. Soc.* **2016**, *138*, 14039–14046.
6. Wulff, J. E.; A Novel Route to 4-Quinolones and an Enantioselective Total Synthesis of Virantmycin. Doctoral Thesis, University of Calgary: Calgary, CA, 2005.
7. Goldberg, F. W.; Studies Towards the Total Synthesis of FR182877;. Doctoral Thesis, University of London: London, UK, 2004.
8. Itoh, T.; Mase, T.; A General Palladium-Catalyzed Coupling of Aryl Bromides/Triflates and Thiols. *Org. Lett.* **2004**, *6*, 4587–4590.
9. Ding, Q.; Cao, B.; Yuan, J.; Liu, X.; Peng, Y.; Synthesis of Thioethers via Metal-Free Reductive Coupling of Tosylhydrazones with Thiols. *Org. Biomol. Chem.* **2011**, *9*, 748–751.
10. Wang, B.; Liu, Y.; Lin, C.; Xu, Y.; Liu, Z.; Zhang, Y.; Synthesis of Sulfur-Bridged Polycycles via Pd-Catalyzed Dehydrogenative Cyclization. *Org. Lett.* **2014**, *16*, 4574–4577.
11. Wang, D.-H.; Yu, J.-Q.; Highly Convergent Total Synthesis of (+)-Lithospermic Acid via a Late-Stage Intermolecular C–H Olefination. *J. Am. Chem. Soc.* **2011**, *133*, 5767–5769.
12. (a) Wang, B.; Shen, C.; Yao, J.; Yin, H.; Zhang, Y.; Palladium(II)-Catalyzed ortho-Olefination of Arenes Applying Sulfoxides as Remote Directing Groups. *Org. Lett.* **2014**, *16*, 46–49. (b) Yu, M.; Xie, Y.; Xie, C.; Zhang, Y.; Palladium-Catalyzed C–H Alkenylation of Arenes Using Thioethers as Directing Groups. *Org. Lett.* **2012**, *14*, 2164–2167.
13. Otsuka, S.; Nogi, K.; Yorimitsu, H.; Palladium-Catalyzed Insertion of Isocyanides into the C–S Bonds of Heteroaryl Sulfides. *Angew. Chem. Int. Ed.* **2018**, *57*, 6653–6657.
14. Baudin, J. B.; Hareau, G.; Julia, S. A.; Lorne, R.; Stereochemistry of Direct Olefin Formation from Carbonyl Compounds and Lithiated Heterocyclic Sulfones. *Bull. Soc. Chim. Fr.* **1993**, *130*, 856–878.
15. Day, J. J.; Neill, D. L.; Xu, S.; Xian, M.; Benzothiazole Sulfinic Acid: A Sulfinic Acid Transfer Reagent under Oxidation-Free Conditions. *Org. Lett.* **2017**, *19*, 3819–3822.
16. Bon, D. J. Y. D.; Kováč, O.; Ferugová, V.; Zálešák, F.; Pospíšil, J.; One and Two-Carbon Homologation of Primary and Secondary Alcohols to Corresponding Carboxylic Esters Using  $\beta$ -Carbonyl BT Sulfones as a Common Intermediate. *J. Org. Chem.* **2018**, *83*, 4990–5001.
17. Zenzola, M.; Doran, R.; Degennaro, L.; Luisi, R.; Bull, J. A.; Transfer of Electrophilic NH Using Convenient Sources of Ammonia: Direct Synthesis of NH Sulfoximines from Sulfoxides. *Angew. Chem. Int. Ed.* **2016**, *55*, 7203–7207.
18. O'Malley, S. J.; Tan, K. L.; Watzke, A.; Bergman, R. G.; Ellman, J. A.; Total Synthesis of (+)-Lithospermic Acid by Asymmetric Intramolecular Alkylation via Catalytic C–H Bond Activation. *J. Am. Chem. Soc.* **2005**, *127*, 13496–13497.
19. Dalla, V.; Cotelle, P.; The Total Synthesis of Salvianolic Acid F. *Tetrahedron.* **1999**, *55*, 6923–6930.
20. Zheng, Y.; Song, W.-B.; Xuan, L.-J.; The Asymmetric Total Synthesis of (+)-Salvianolic Acid A. *Tetrahedron.* **2016**, *72*, 5047–5050.

21. Gaussian 09, Revision D.01, Frisch, M. J.; Trucks, G. W.; Schlegel, H. B.; Scuseria, G. E.; Robb, M. A.; Cheeseman, J. R.; Scalmani, G.; Barone, V.; Mennucci, B.; Petersson, G. A.; Nakatsuji, H.; Caricato, M.; Li, X.; Hratchian, H. P.; Izmaylov, A. F.; Bloino, J.; Zheng, G.; Sonnenberg, J. L.; Hada, M.; Ehara, M.; Toyota, K.; Fukuda, R.; Hasegawa, J.; Ishida, M.; Nakajima, T.; Honda, Y.; Kitao, O.; Nakai, H.; Vreven, T.; Montgomery, J. A.; Peralta, J. E., Jr.; Ogliaro, F.; Bearpark, M.; Heyd, J. J.; Brothers, E.; Kudin, K. N.; Staroverov, V. N.; Kobayashi, R.; Normand, J.; Raghavachari, K.; Rendell, A.; Burant, J. C.; Iyengar, S. S.; Tomasi, J.; Cossi, M.; Rega, N.; Millam, J. M.; Klene, M.; Knox, J. E.; Cross, J. B.; Bakken, V.; Adamo, C.; Jaramillo, J.; Gomperts, R.; Stratmann, R. E.; Yazyev, O.; Austin, A. J.; Cammi, R.; Pomelli, C.; Ochterski, J. W.; Martin, R. L.; Morokuma, K.; Zakrzewski, V. G.; Voth, G. A.; Salvador, P.; Dannenberg, J. J.; Dapprich, S.; Daniels, A. D.; Farkas, Ö.; Foresman, J. B.; Ortiz, J. V.; Cioslowski, J. and Fox, D. J. Gaussian, Inc., Wallingford CT, 2009.
22. Marenich, A. V.; Cramer, C. J.; Truhlar, D. G.; Universal Solvation Model Based on Solute Electron Density and on a Continuum Model of the Solvent Defined by the Bulk Dielectric Constant and Atomic Surface Tensions. *J. Phys. Chem. B* **2009**, *113*, 6378–6396.
23. CCDC 1905653 (**6c'**), 1905643 (**6d**), 1905647 (**6e**), 1905650 (**6g**), 1905652 (**6j''**), 1905649 (**6u**), 1905646 (**6x**), 1905644 (**9**), 1905651 (**17**), 1905645 (**20**), 1905648 (**22**), 1905654 (**Pd-1**), and 1905655 (**Pd-2**) contain the supplementary crystallographic data for this paper. These data can be obtained free of charge from The Cambridge Crystallographic Data Centre via [www.ccdc.cam.ac.uk/data\\_request/cif](http://www.ccdc.cam.ac.uk/data_request/cif).

# NMR SPECTRA

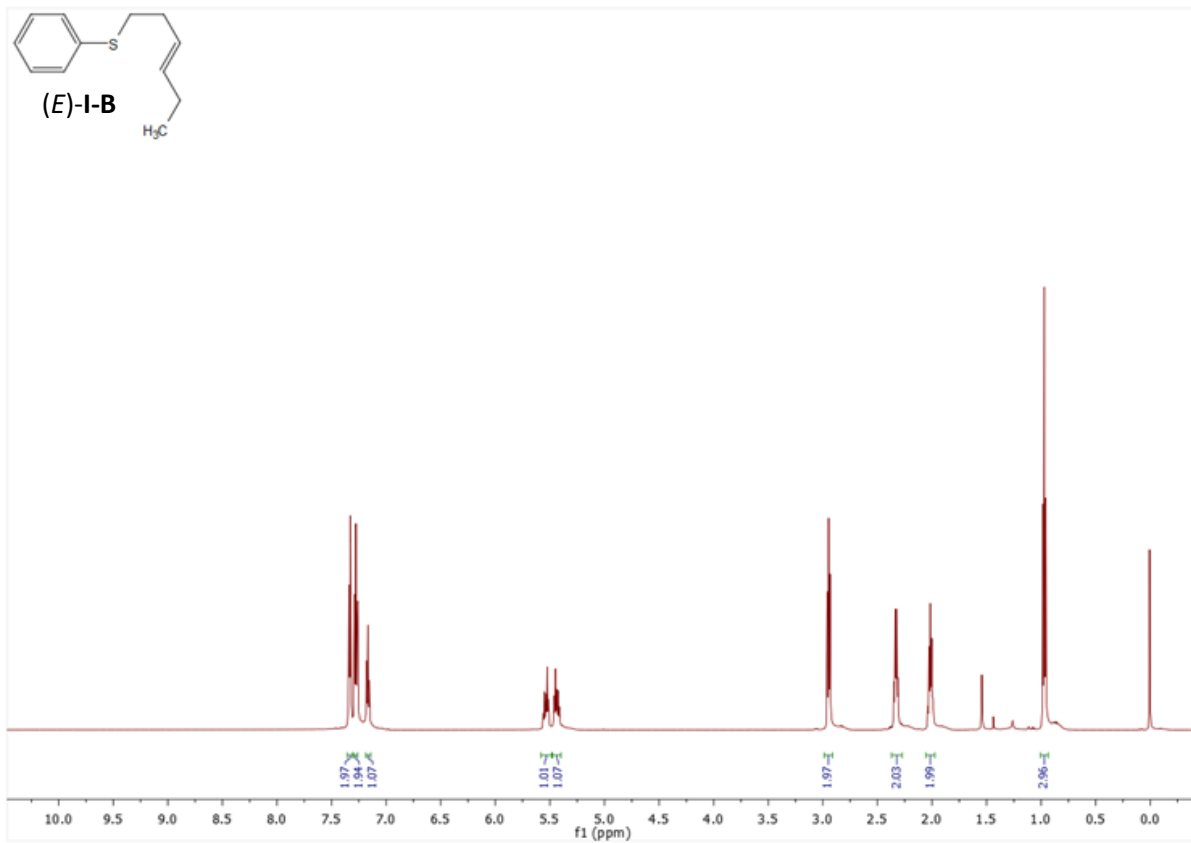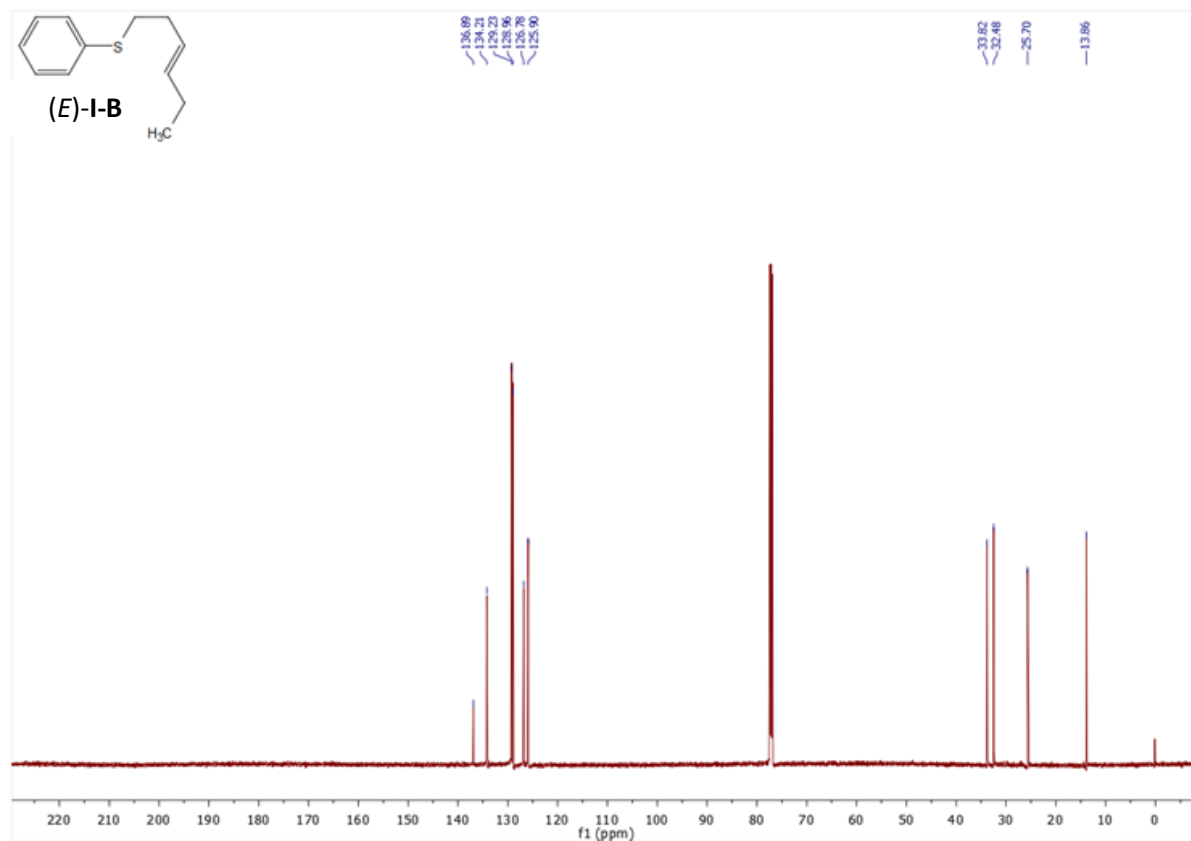

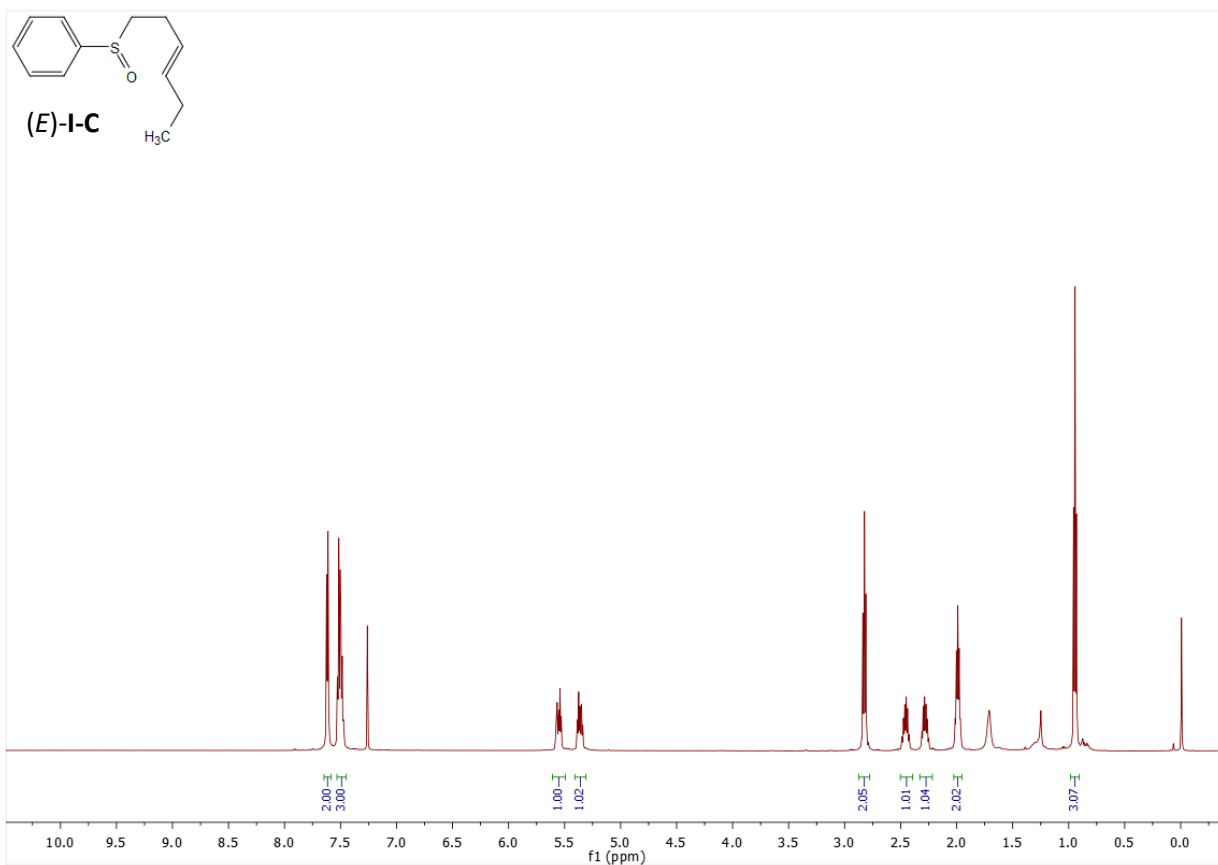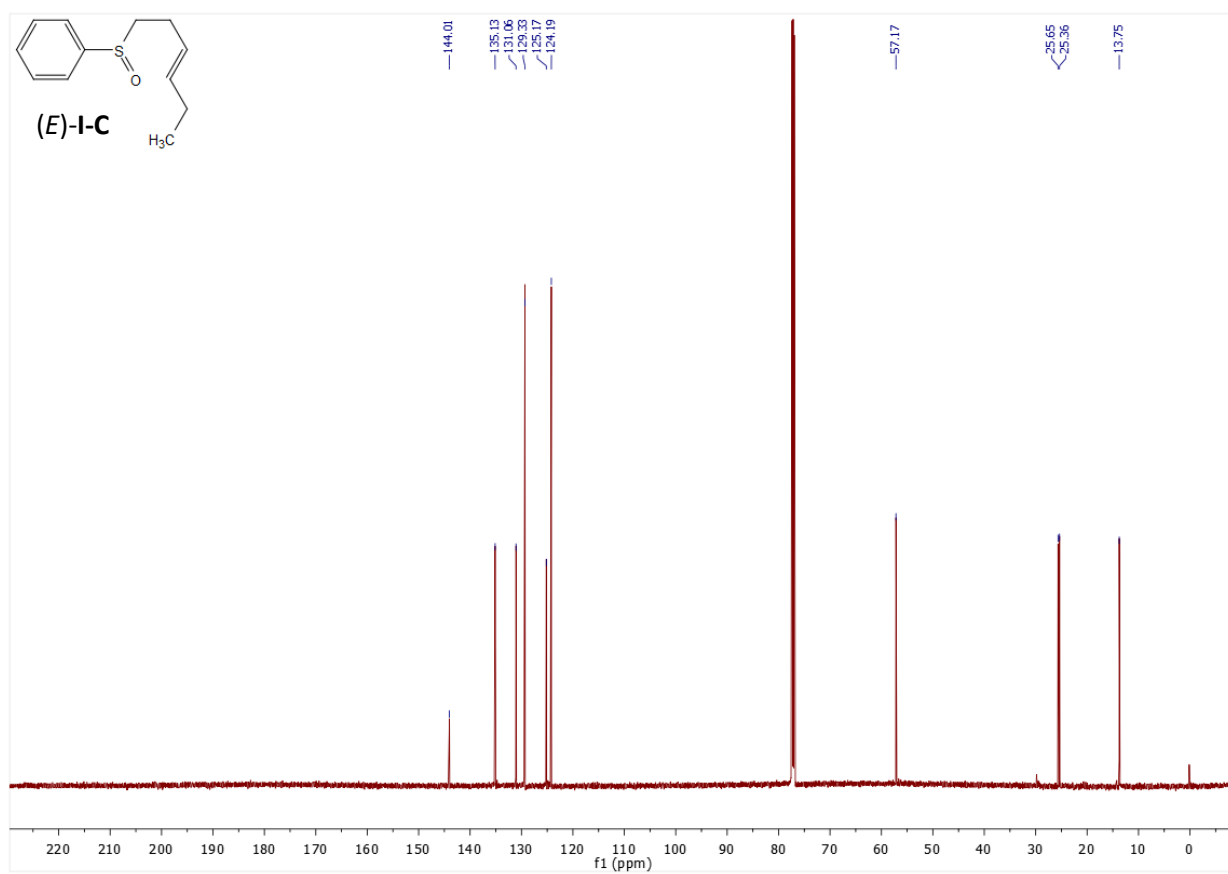

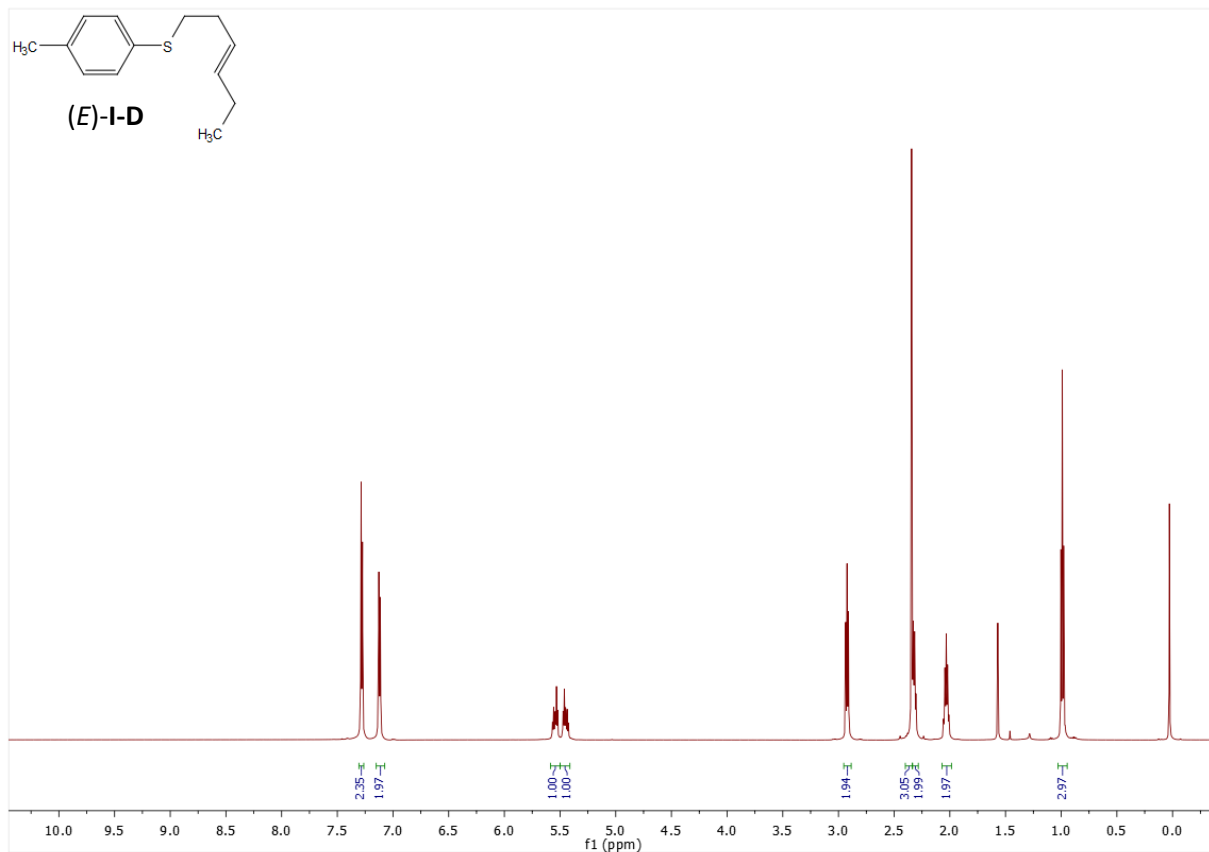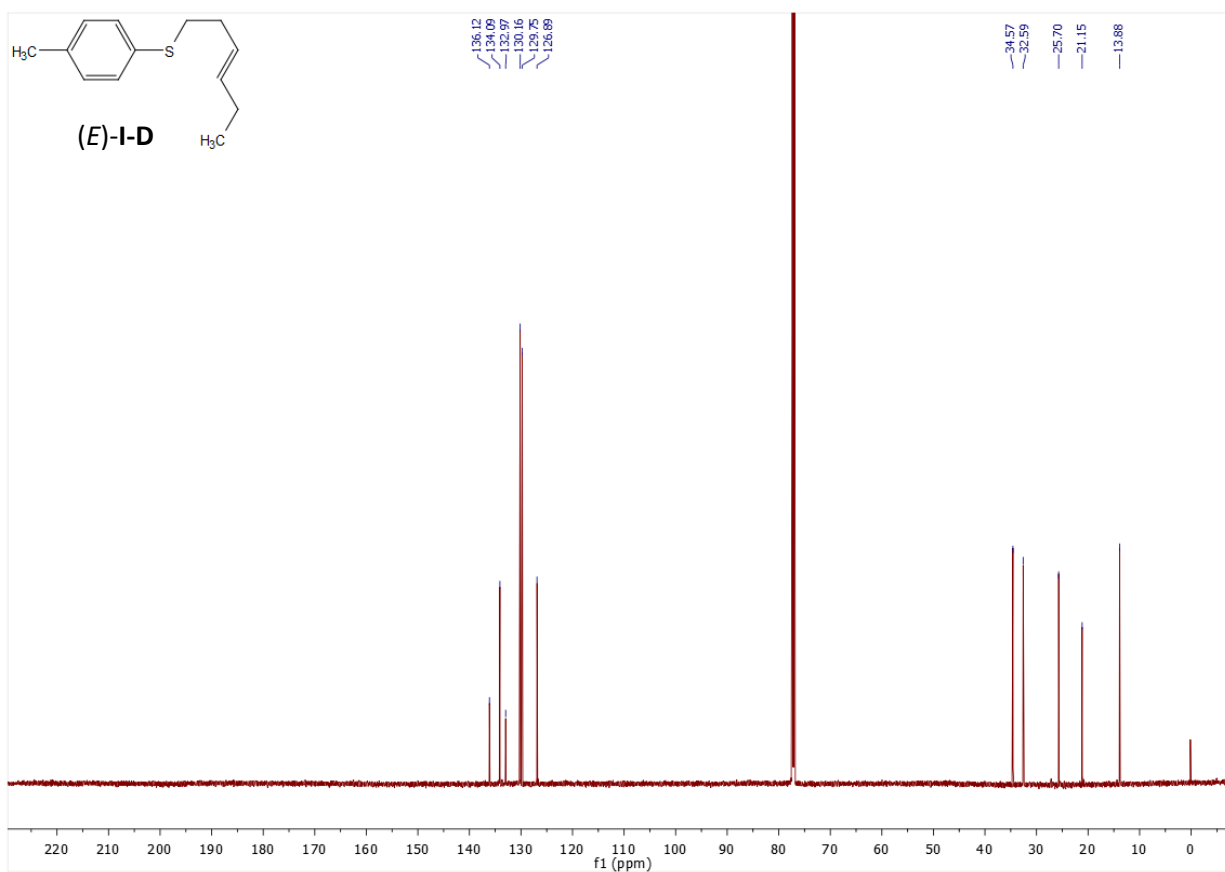

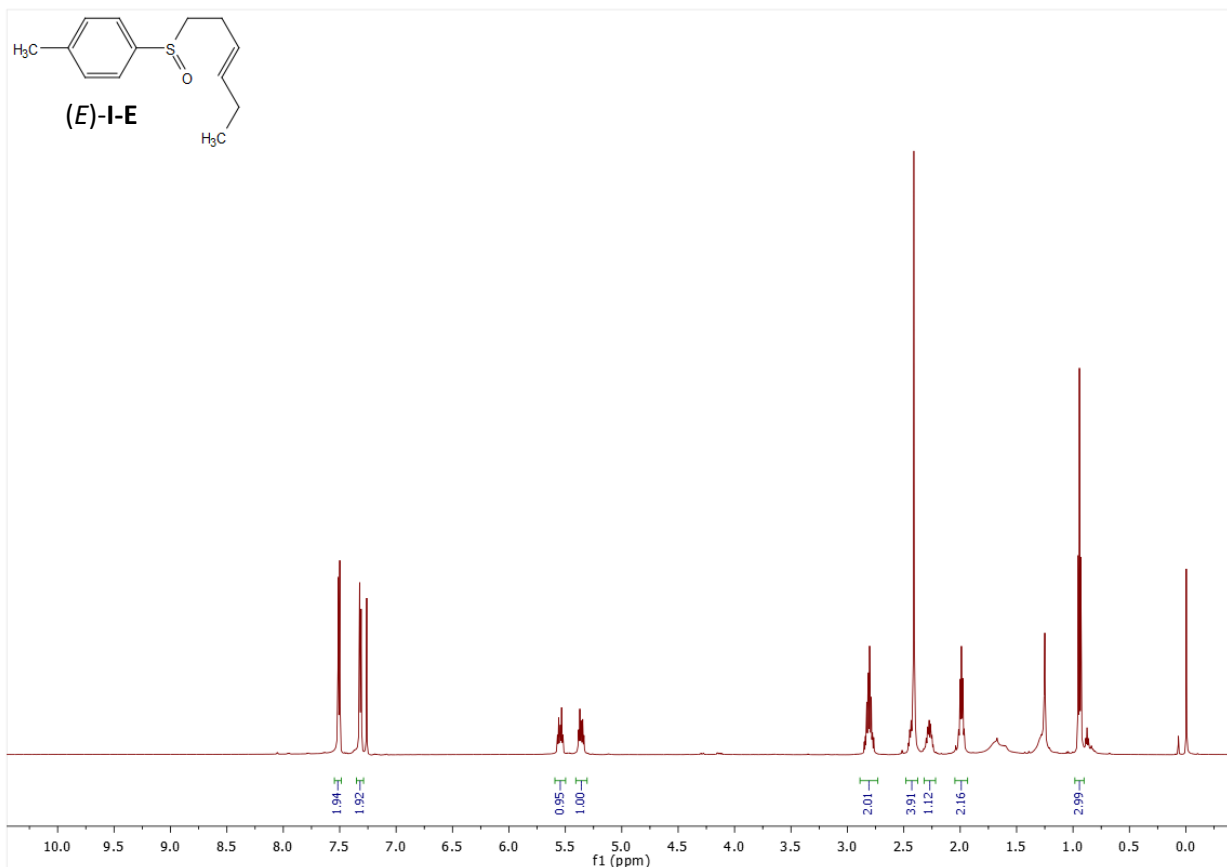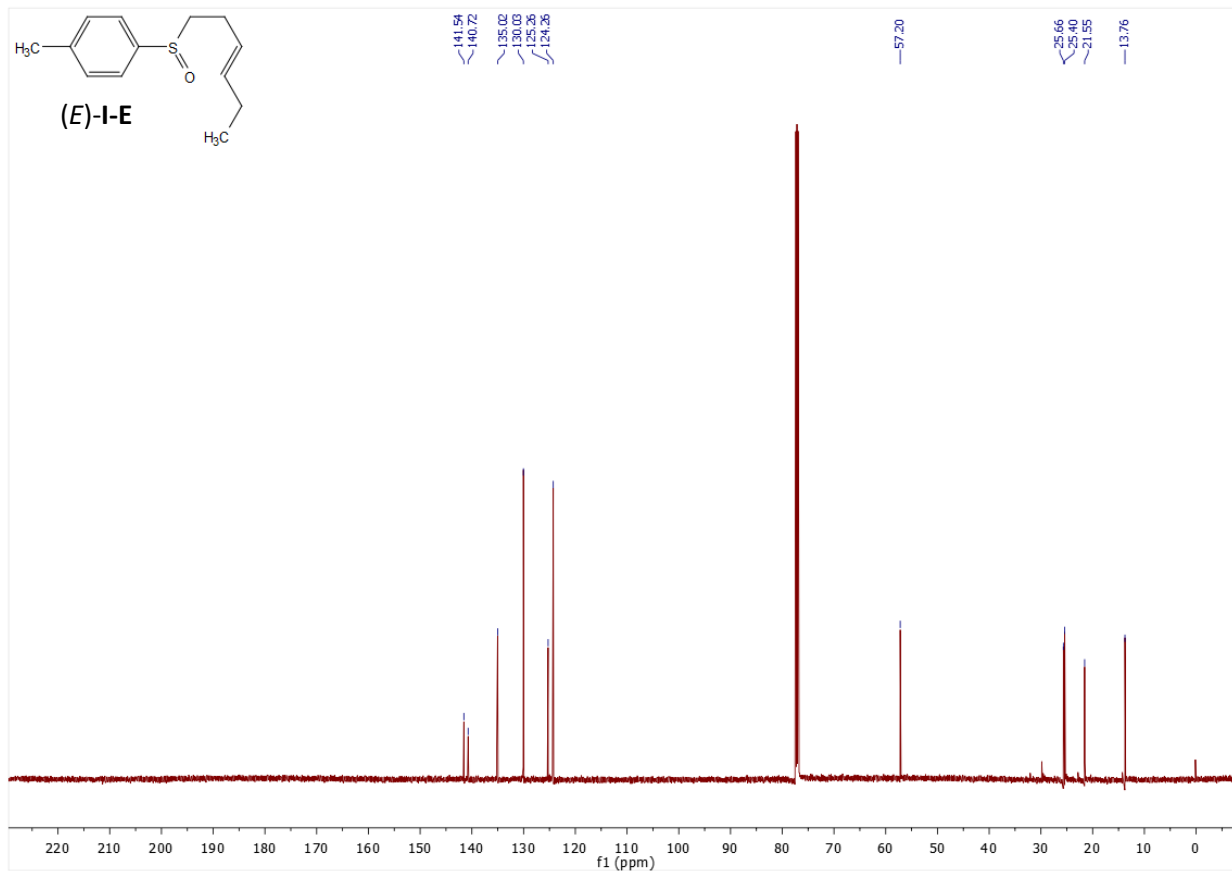

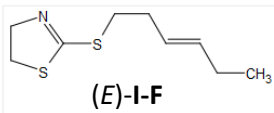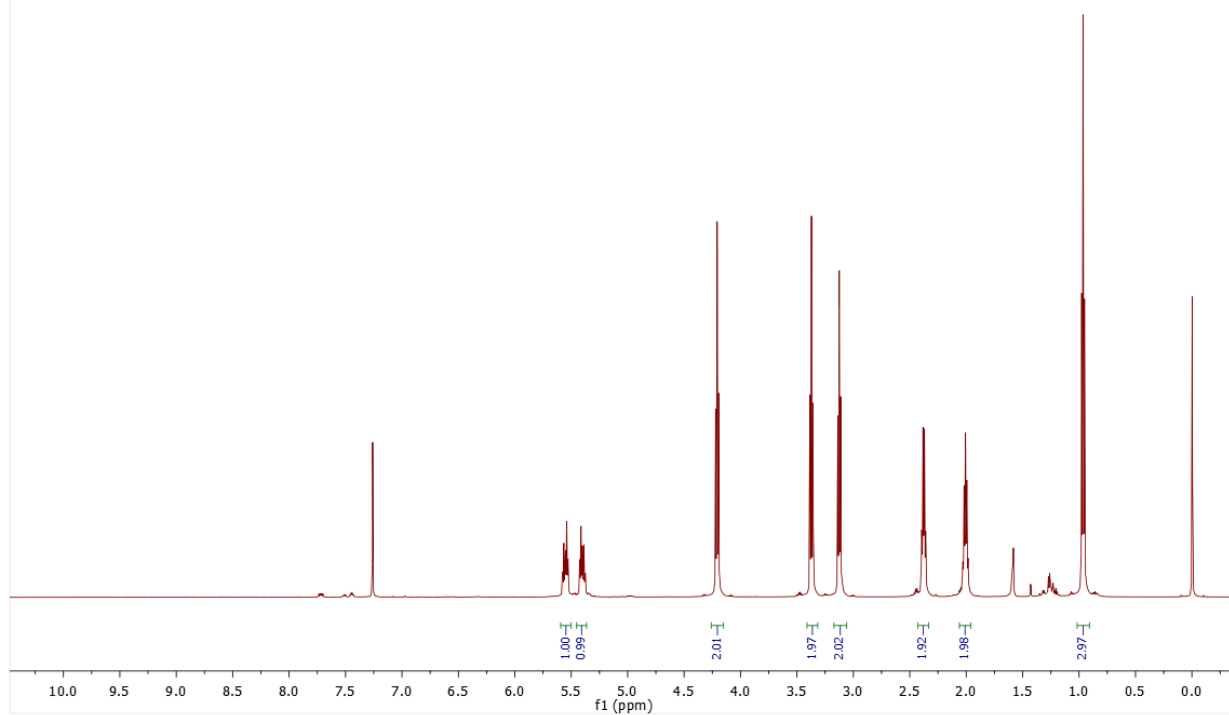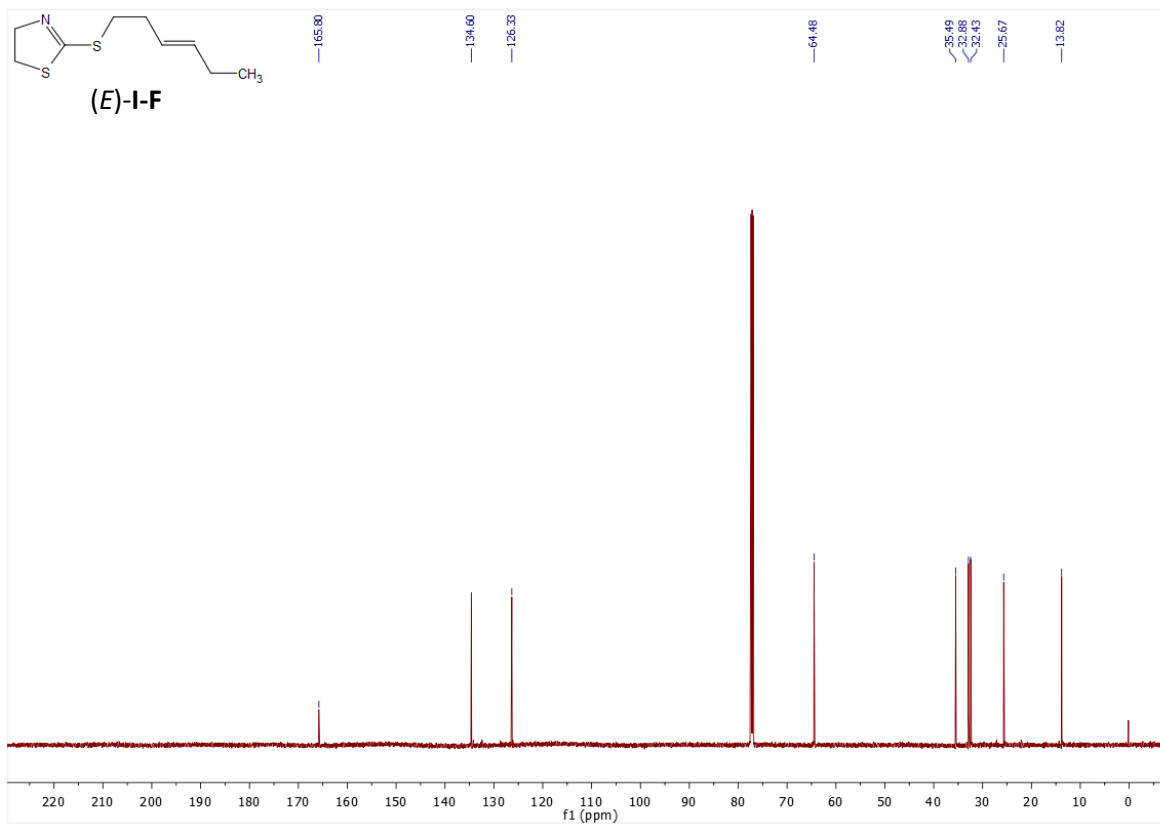

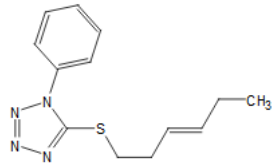

(E)-I-G

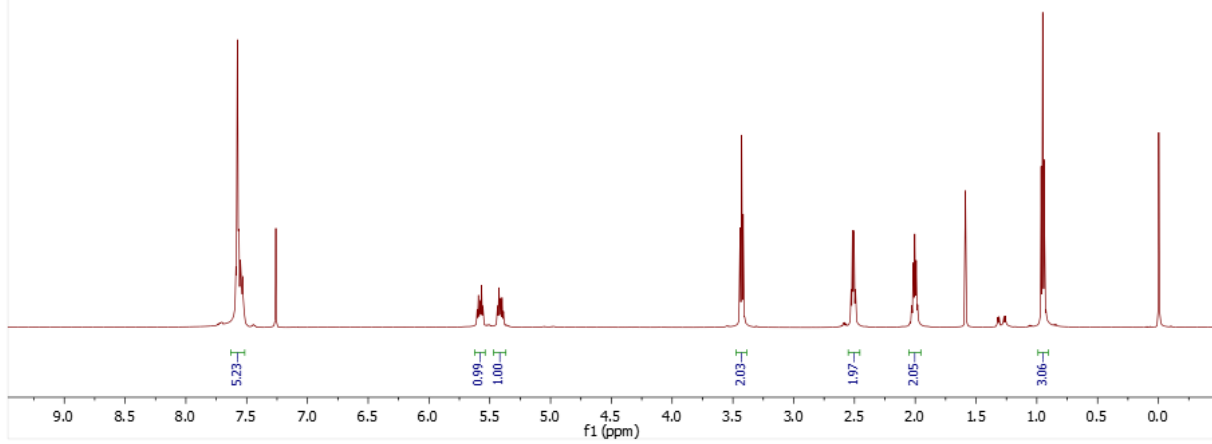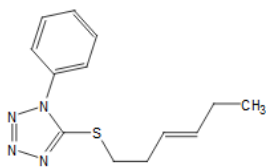

(E)-I-G

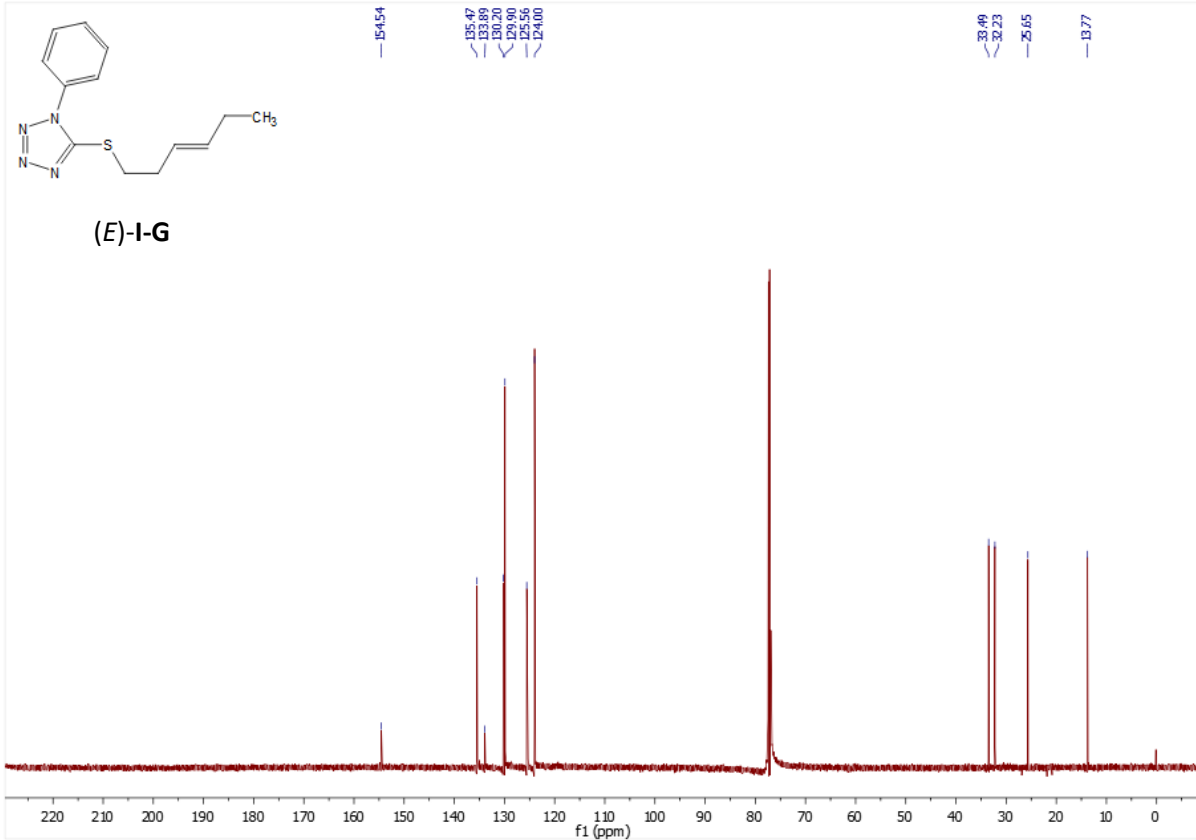



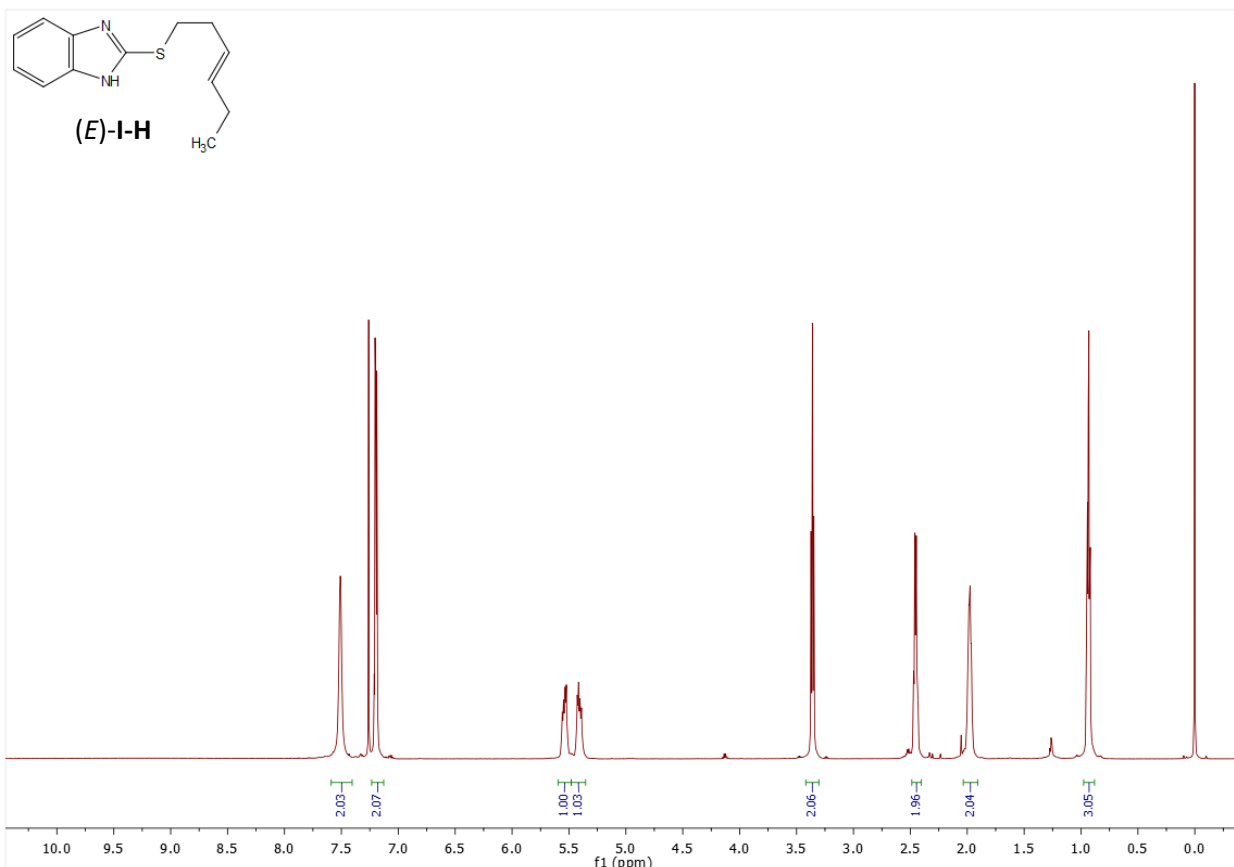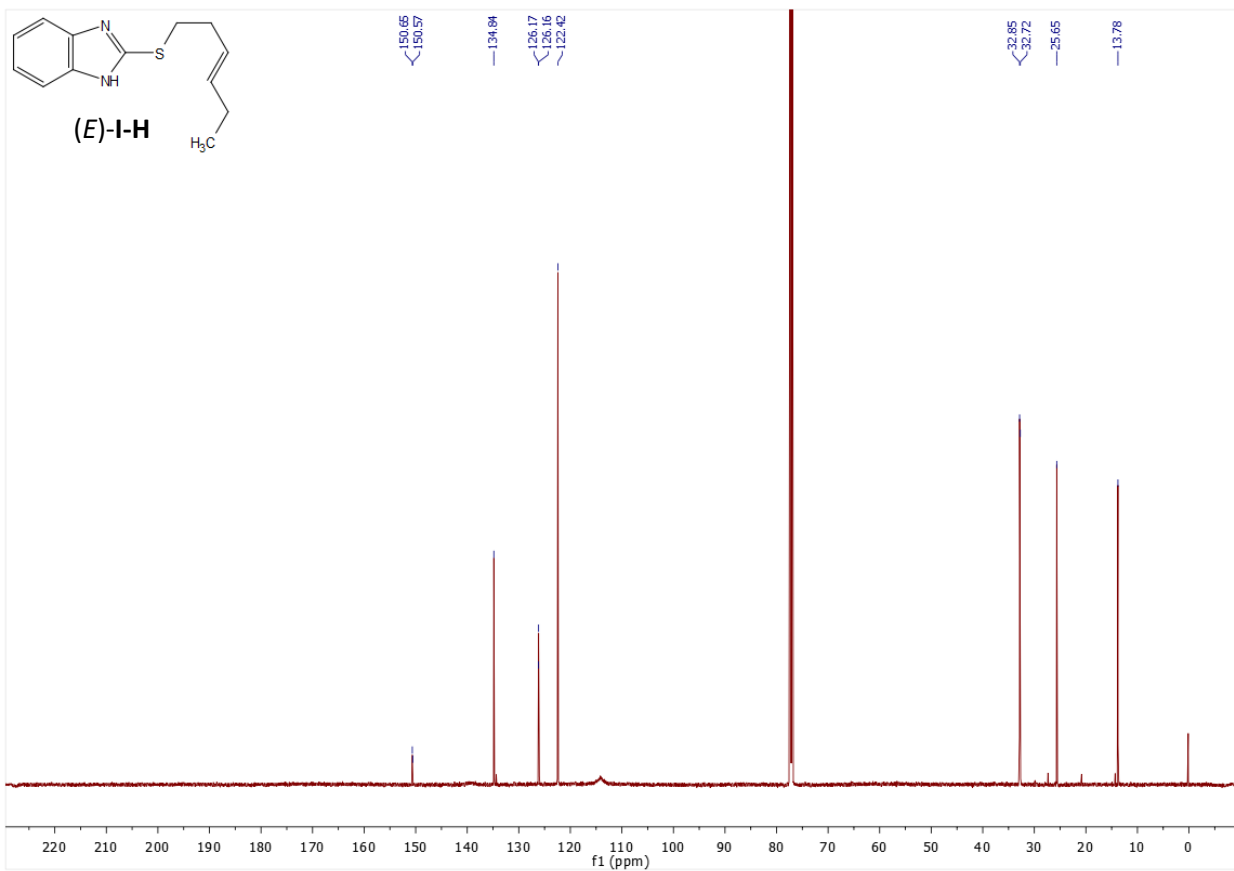

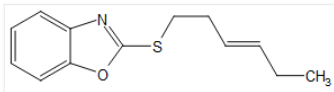

(E)-I-I

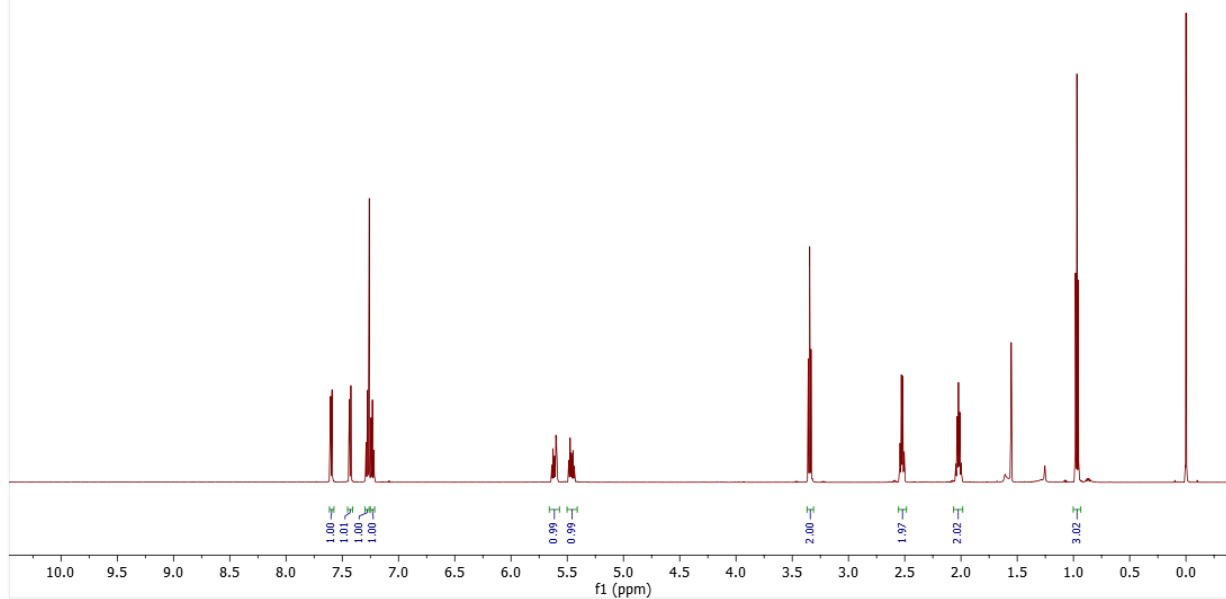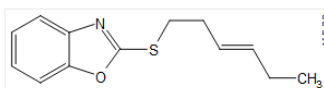

(E)-I-I

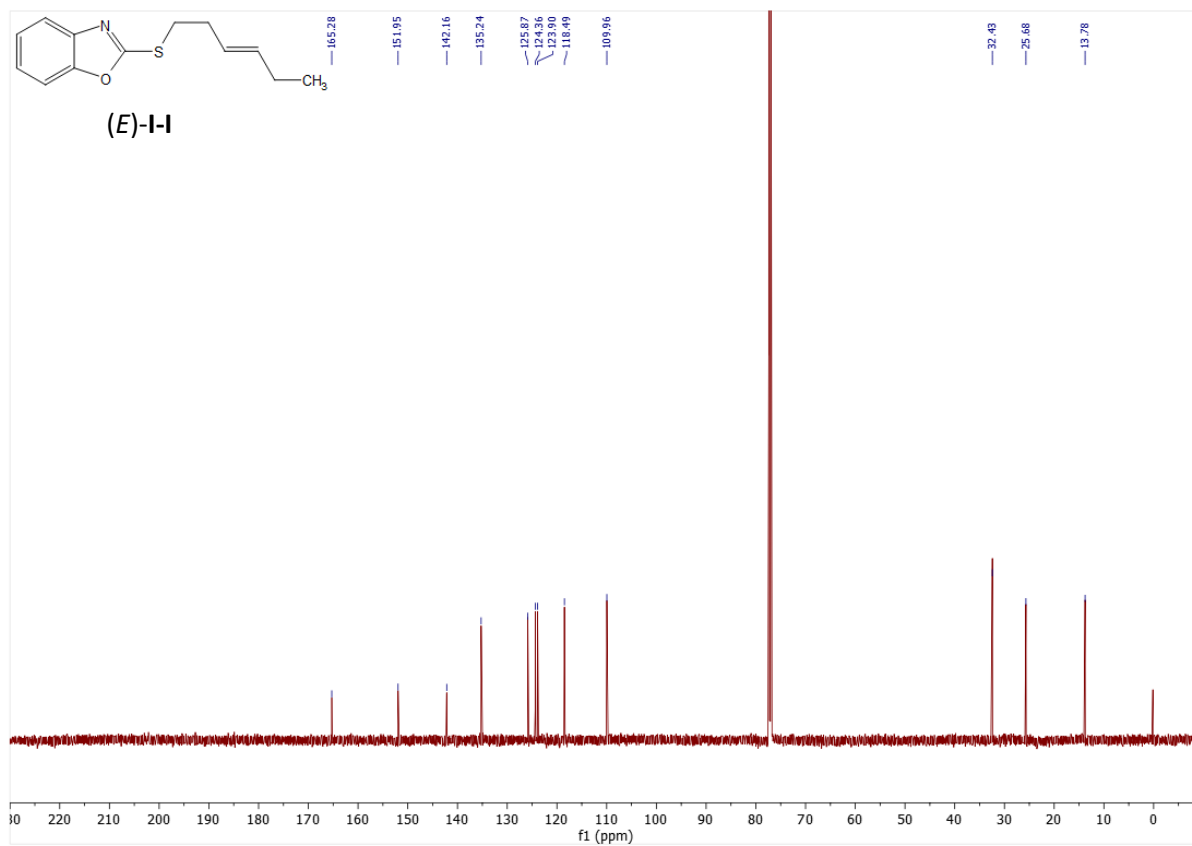

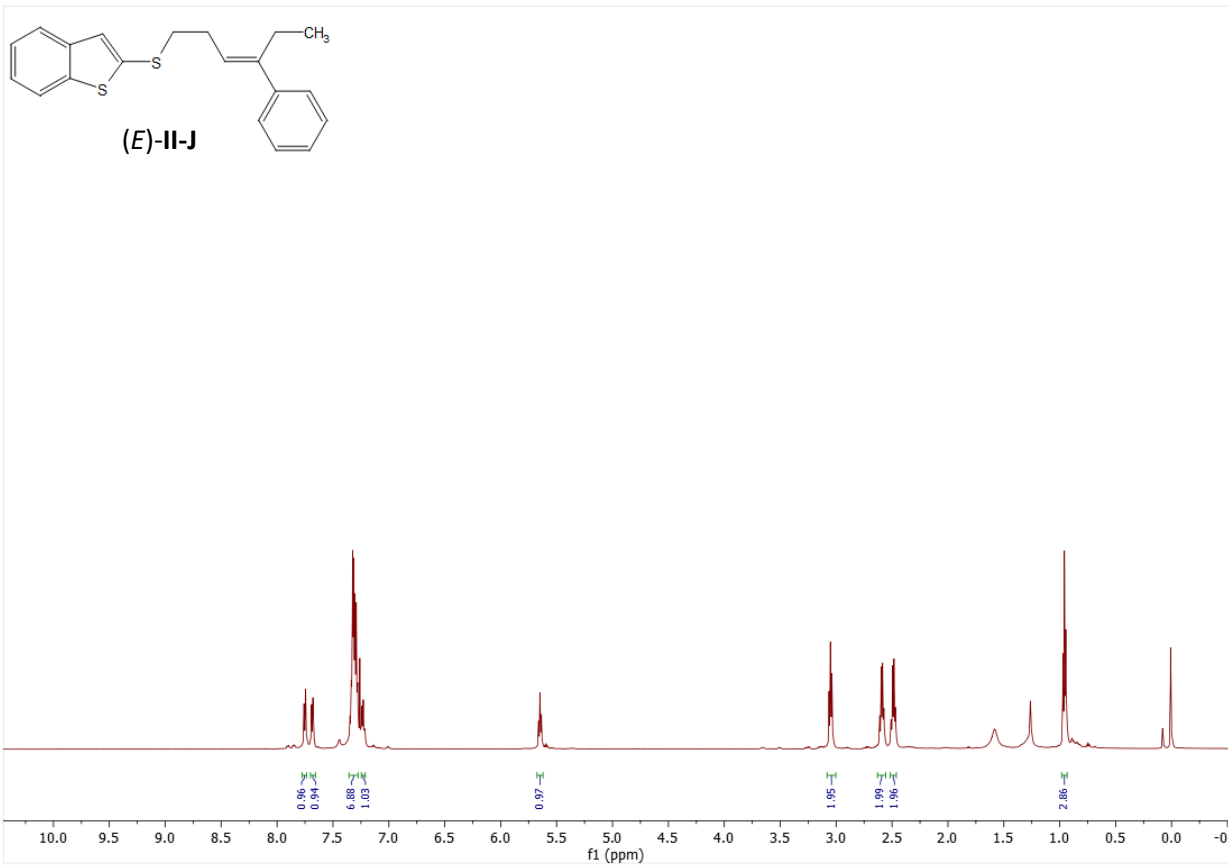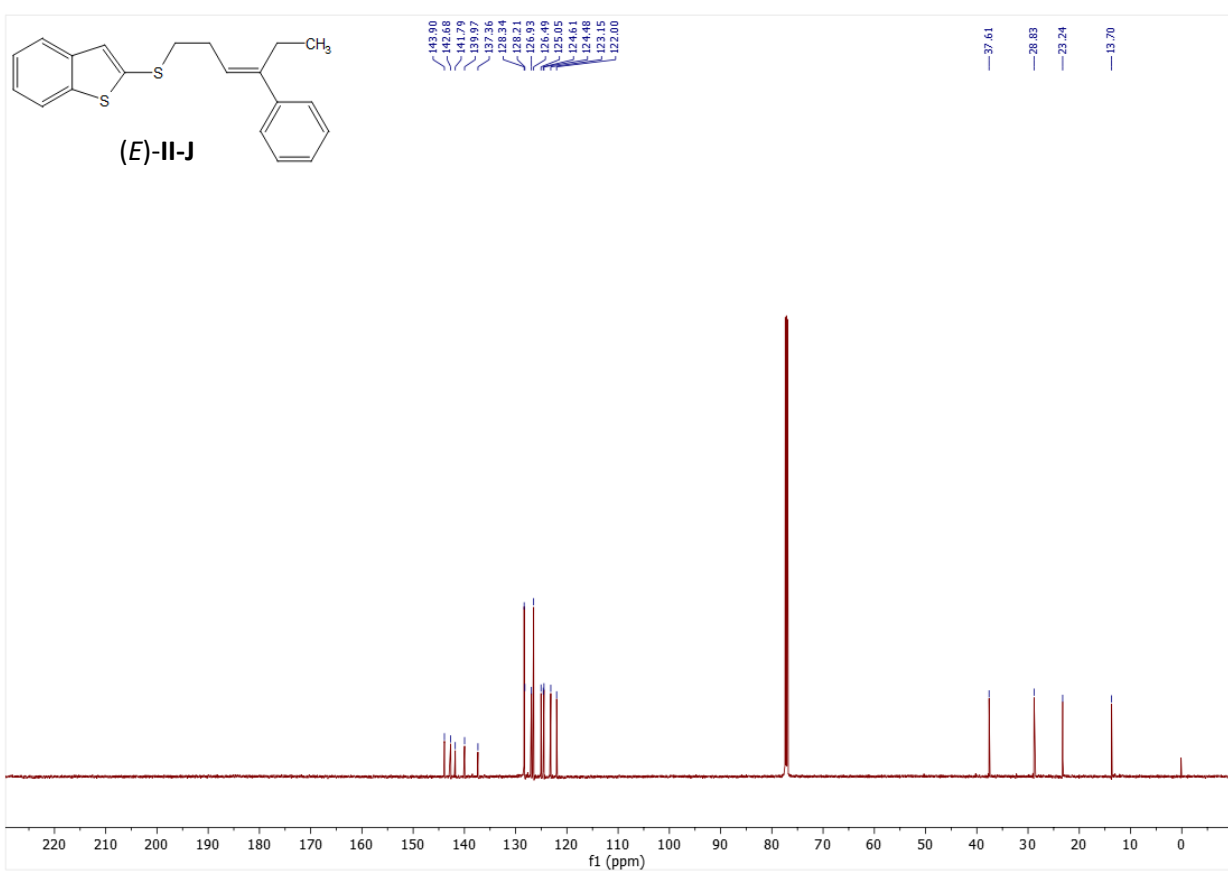

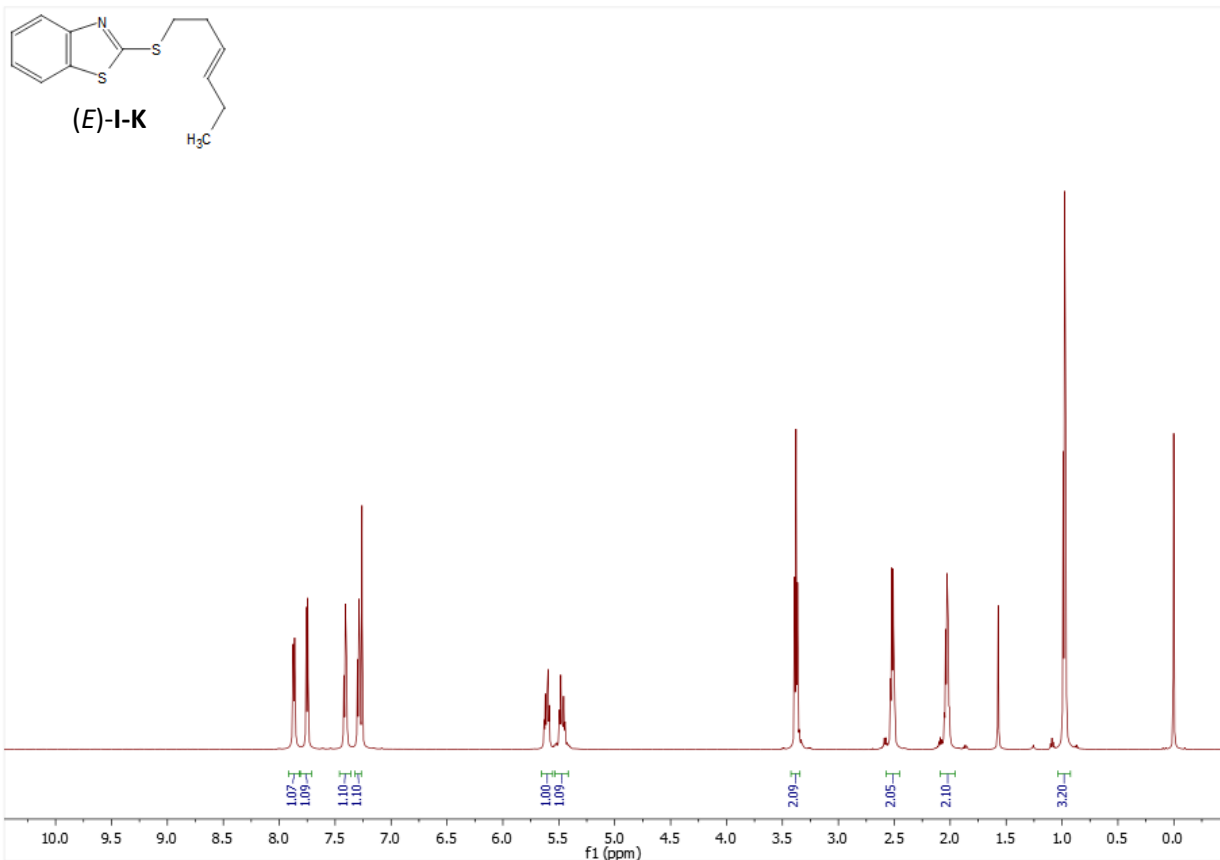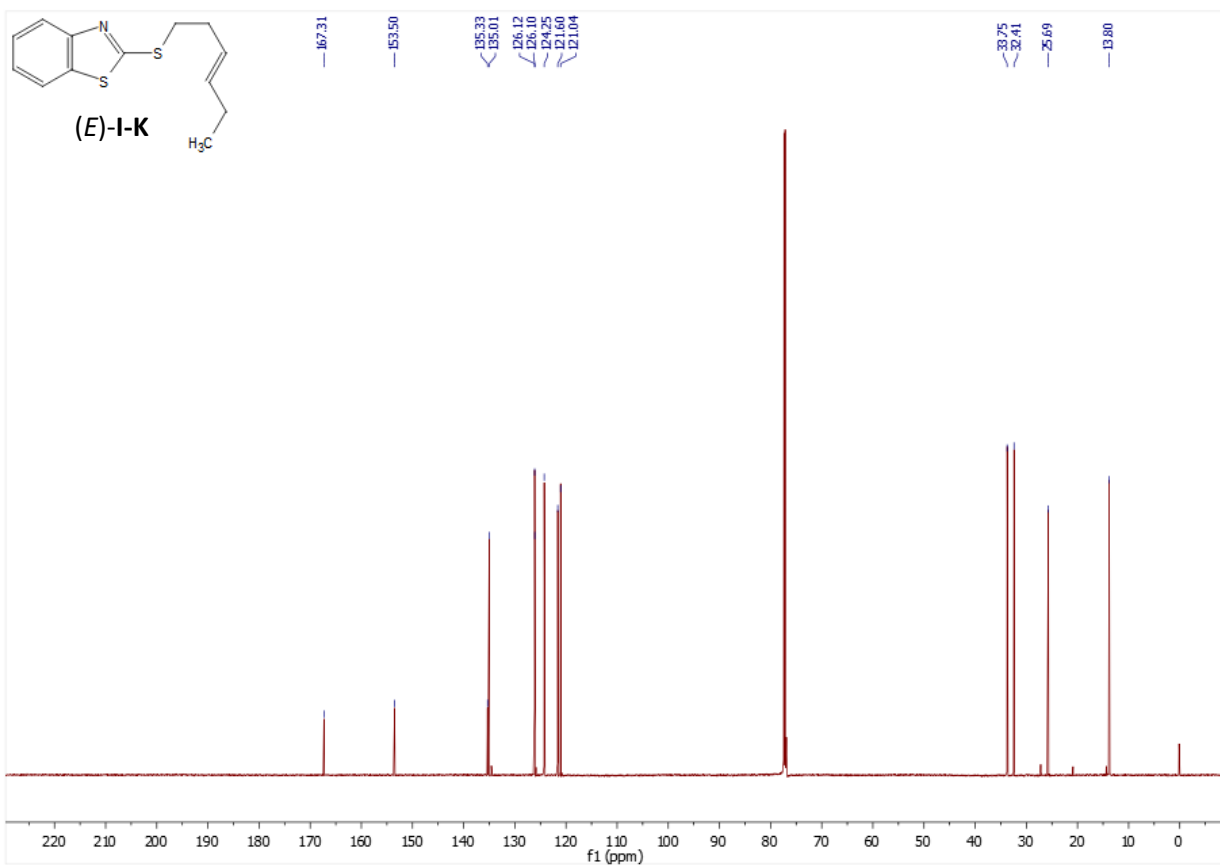

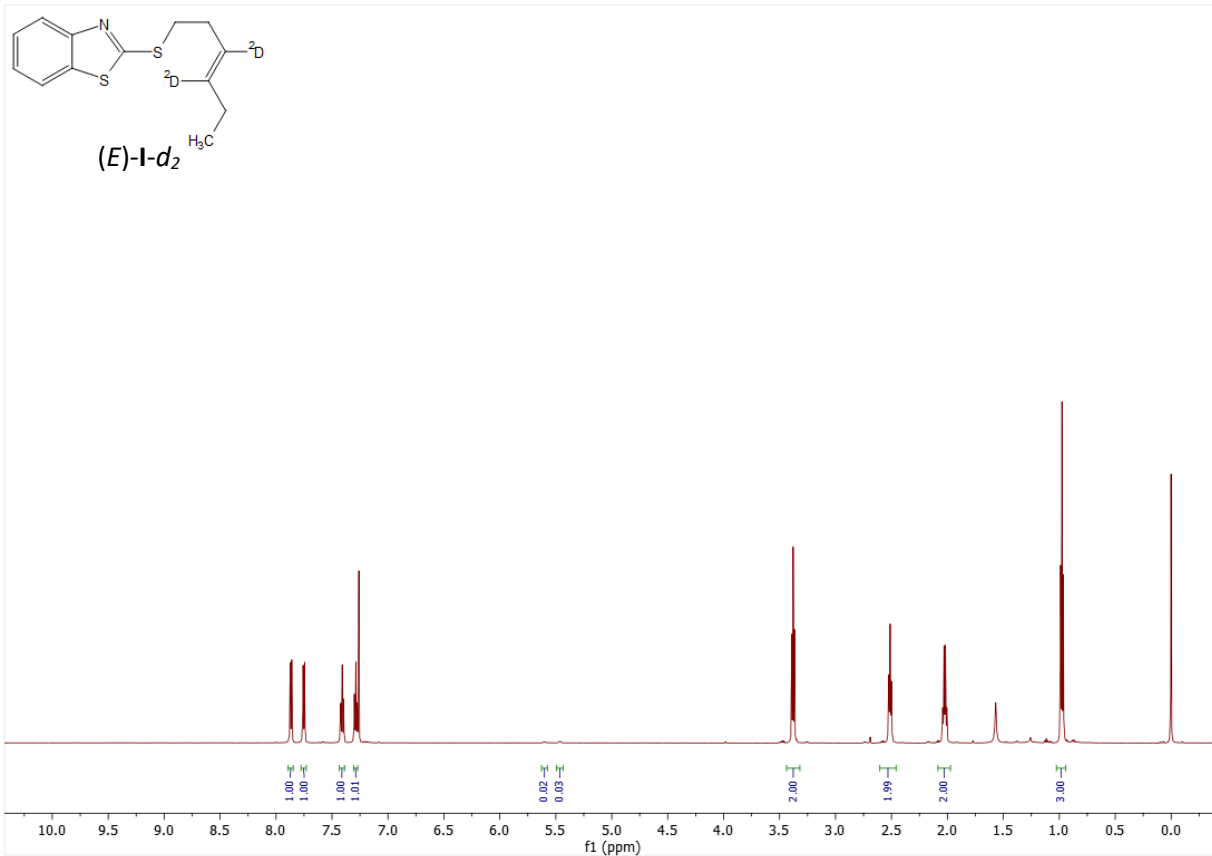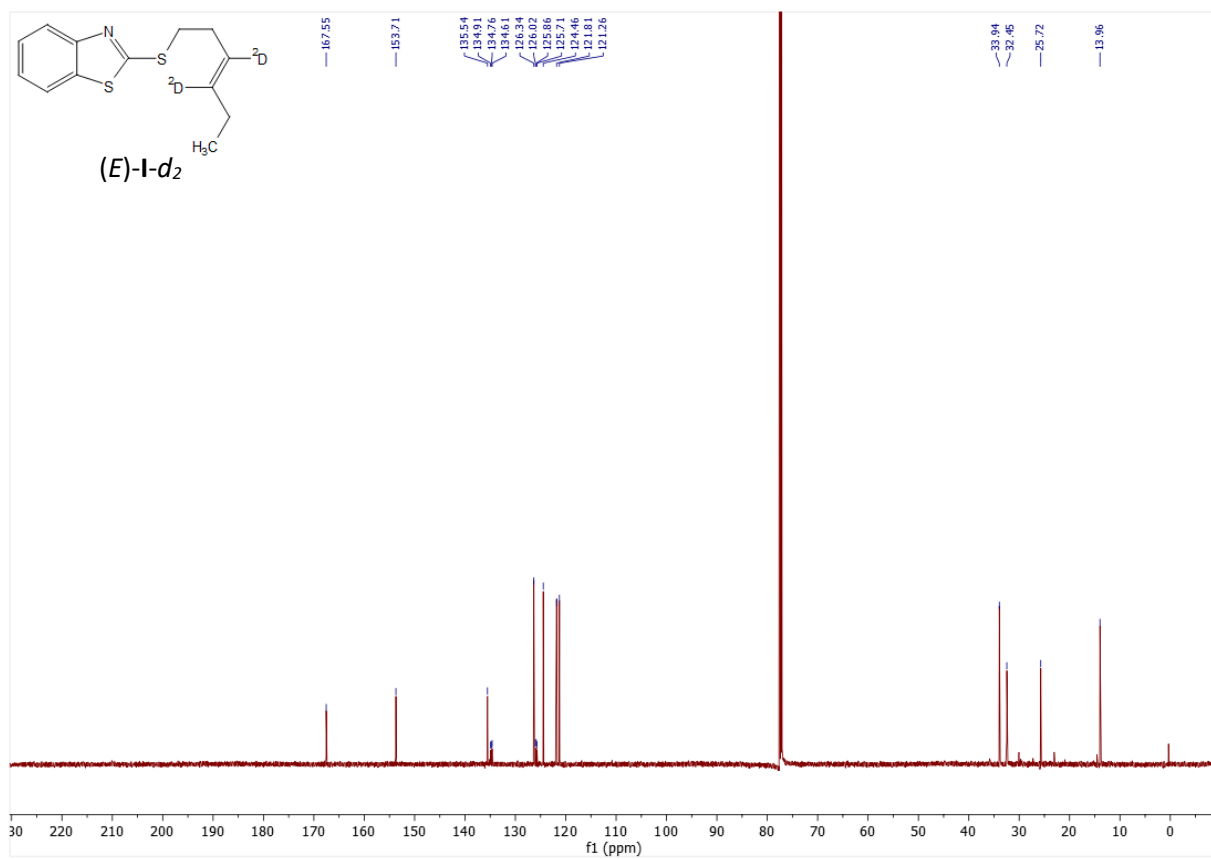

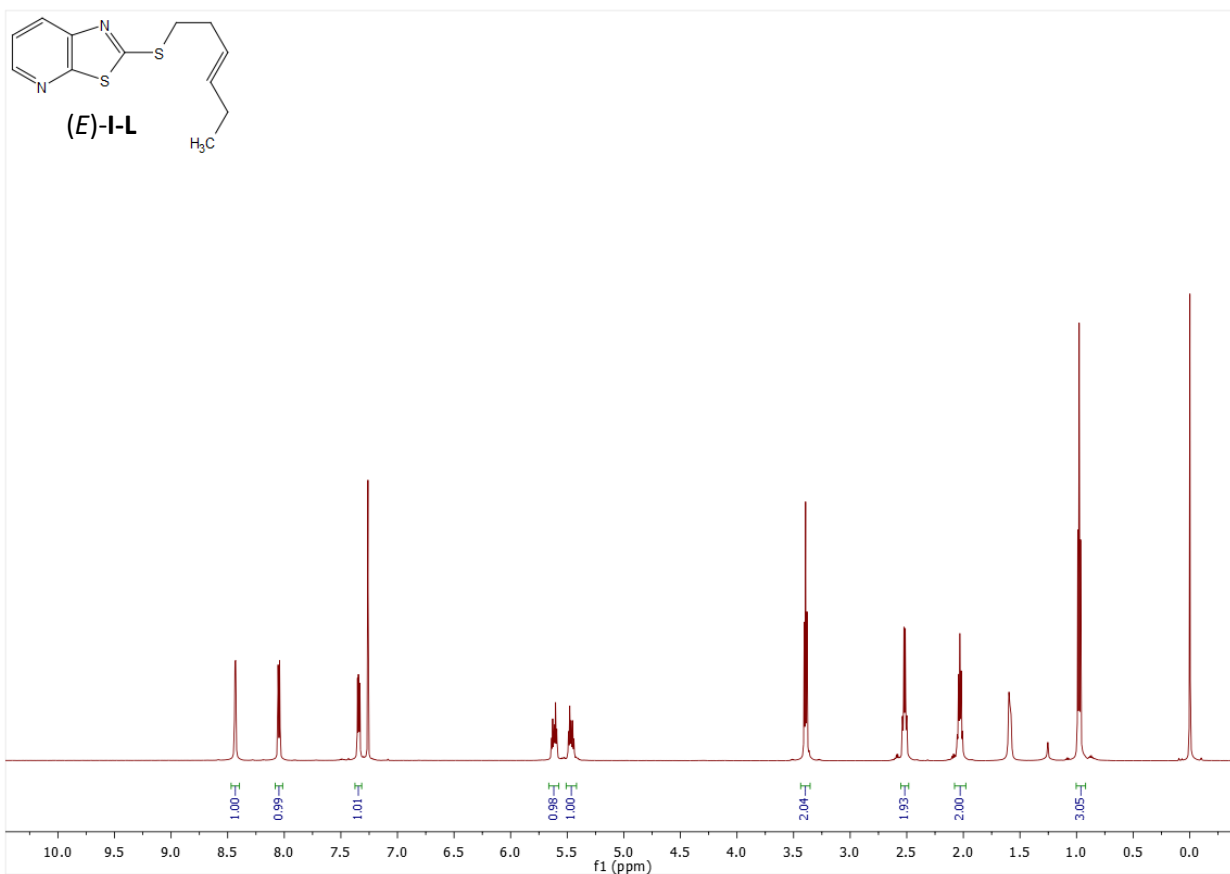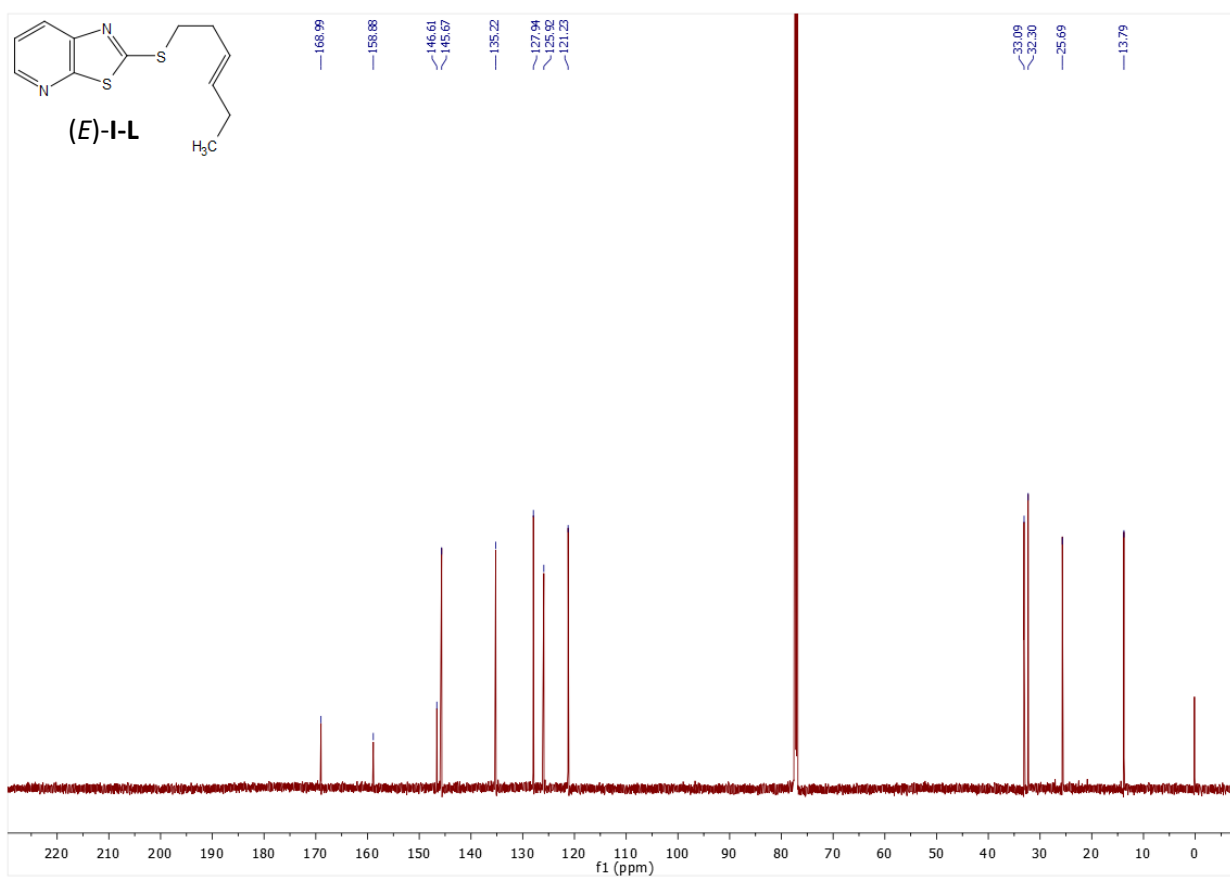

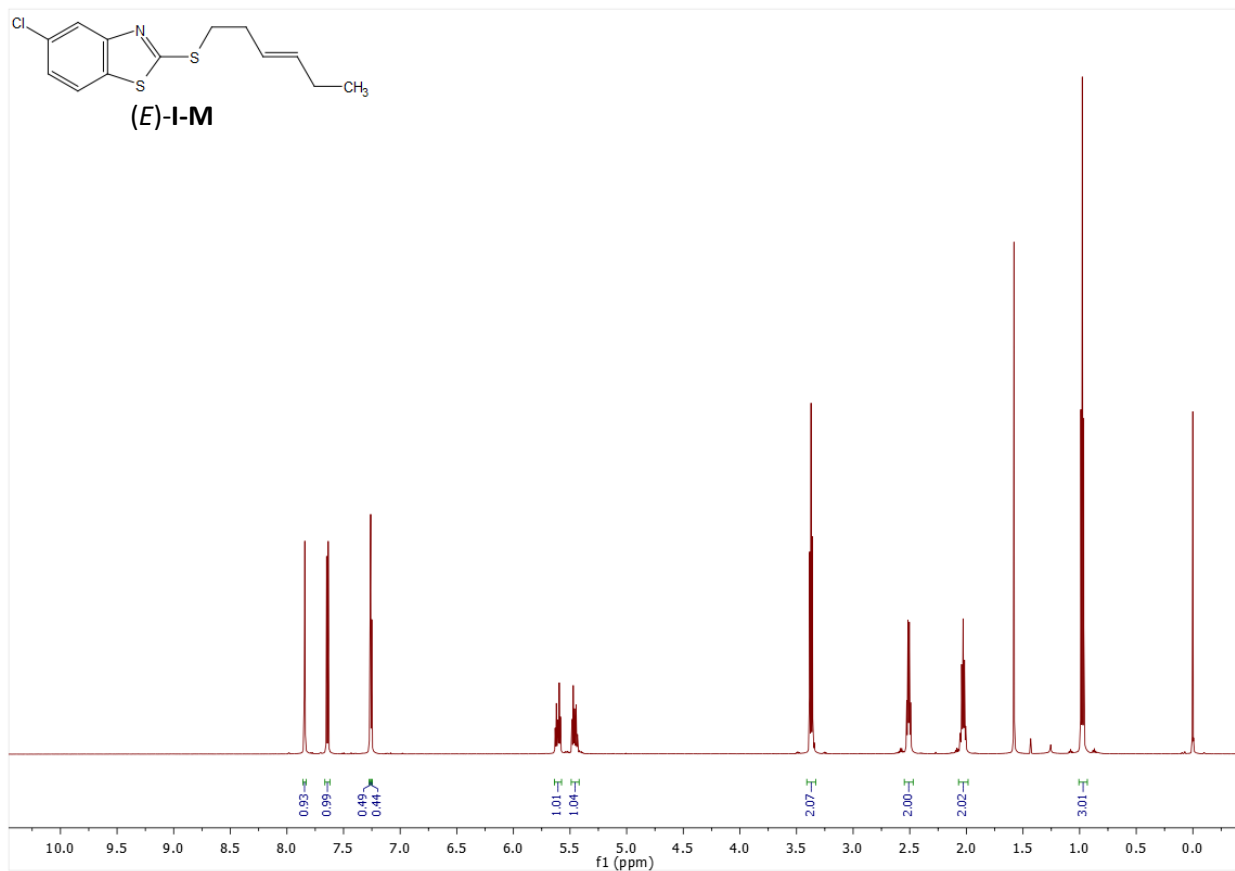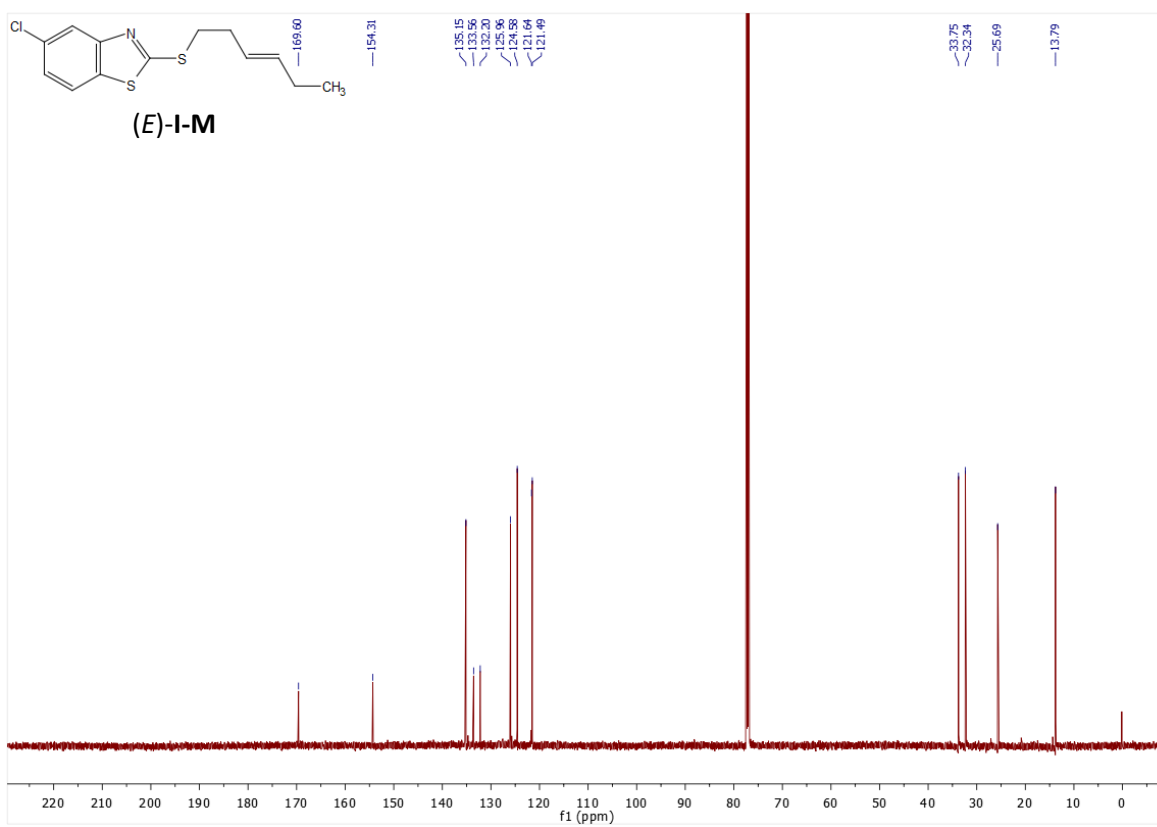

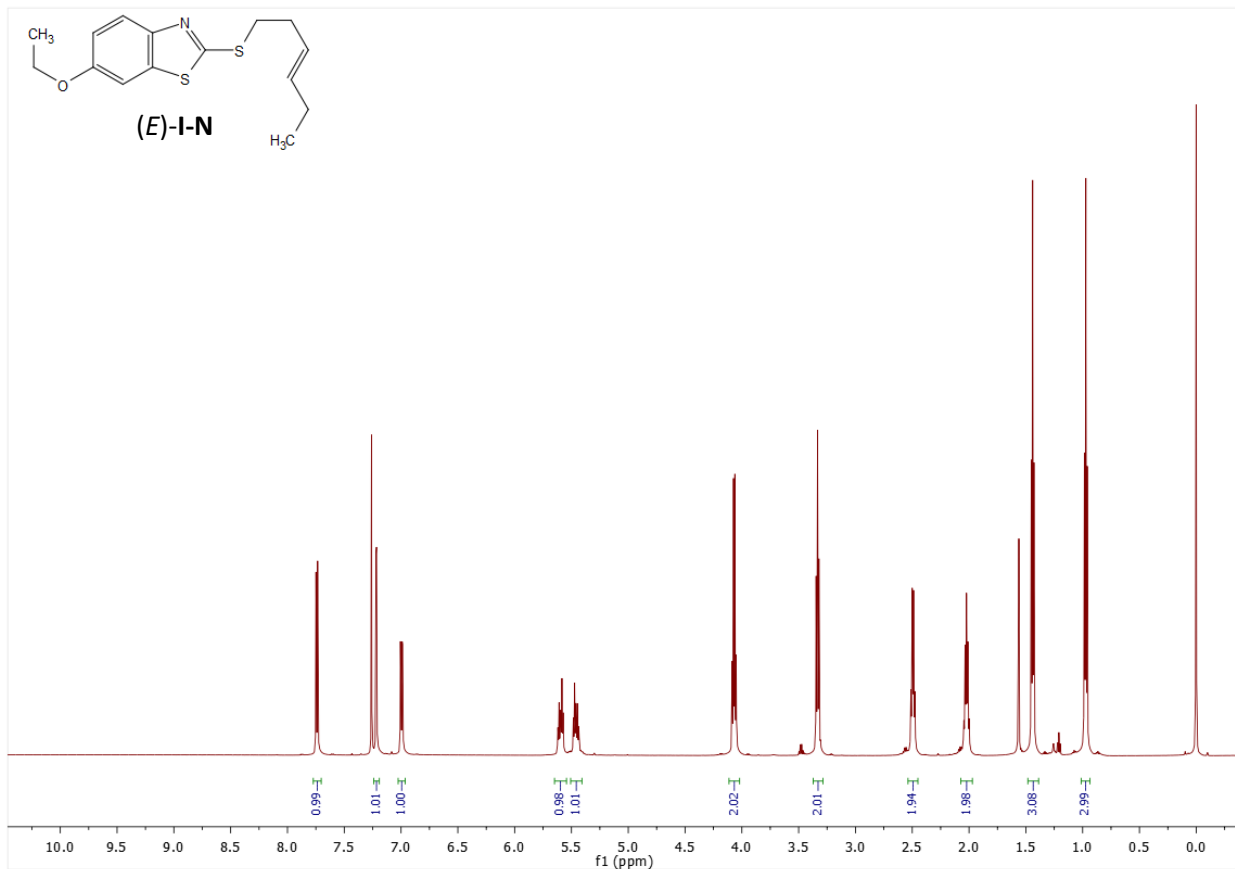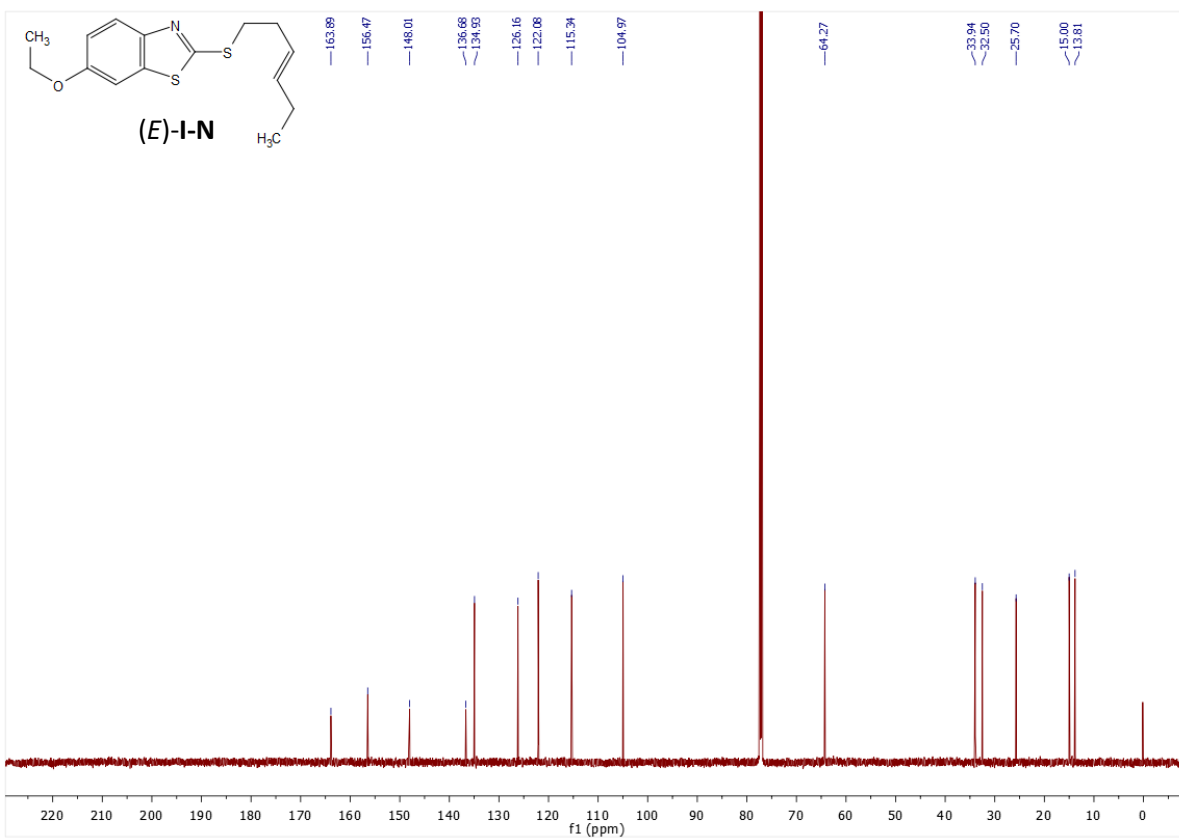



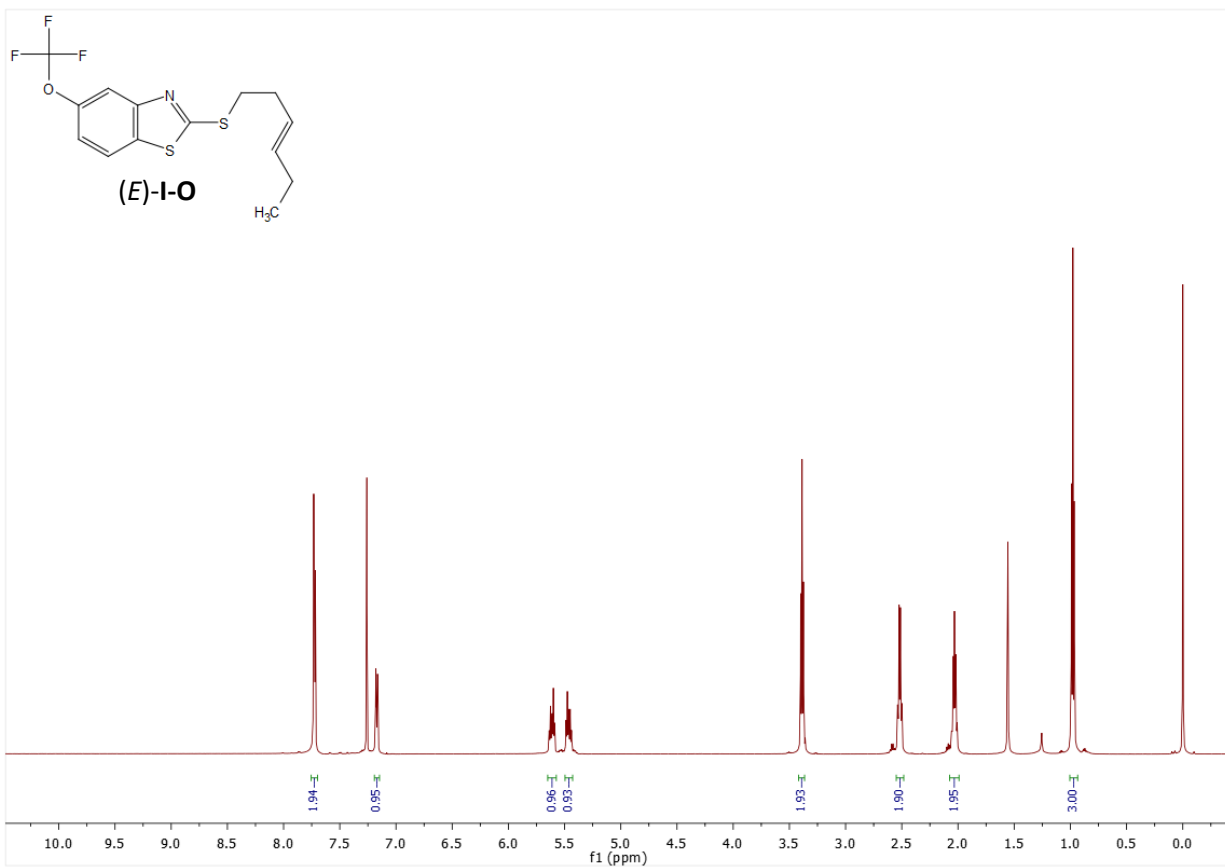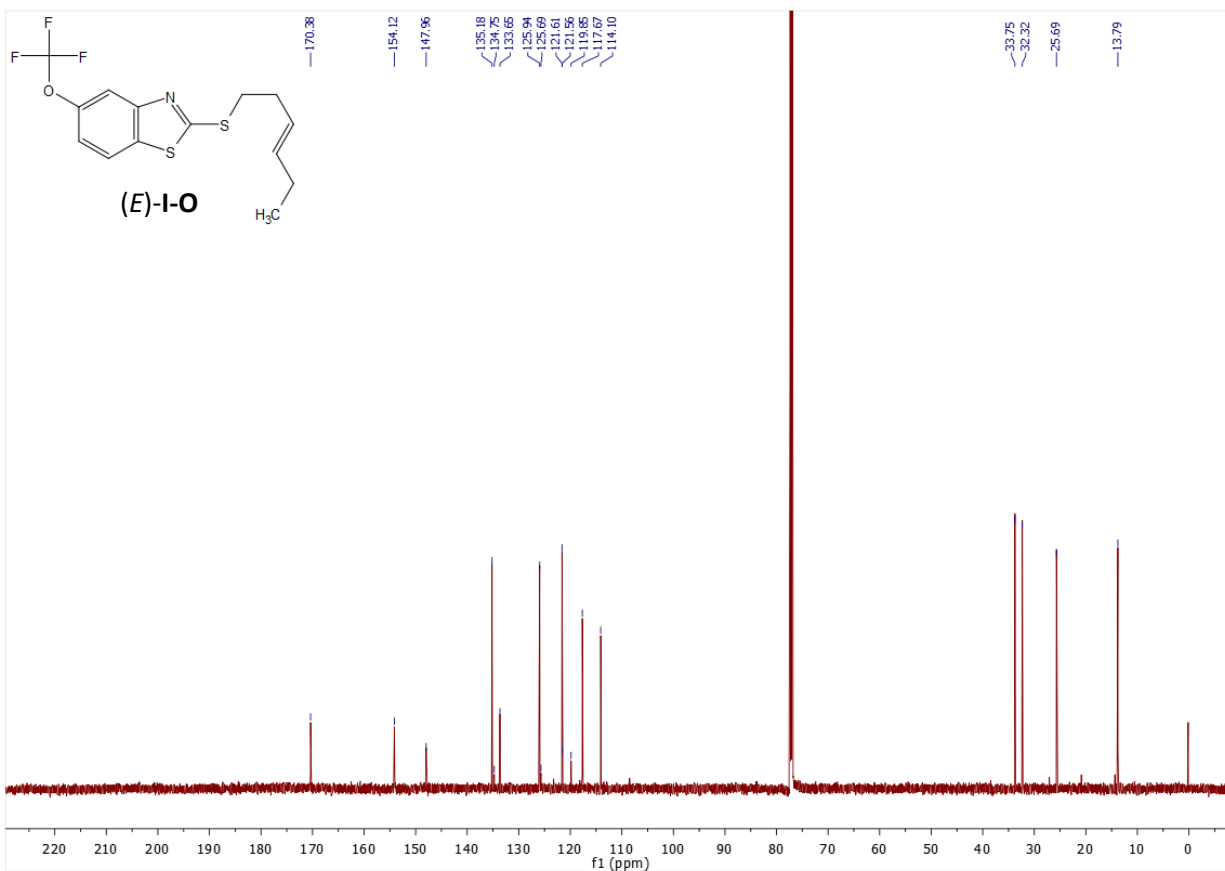

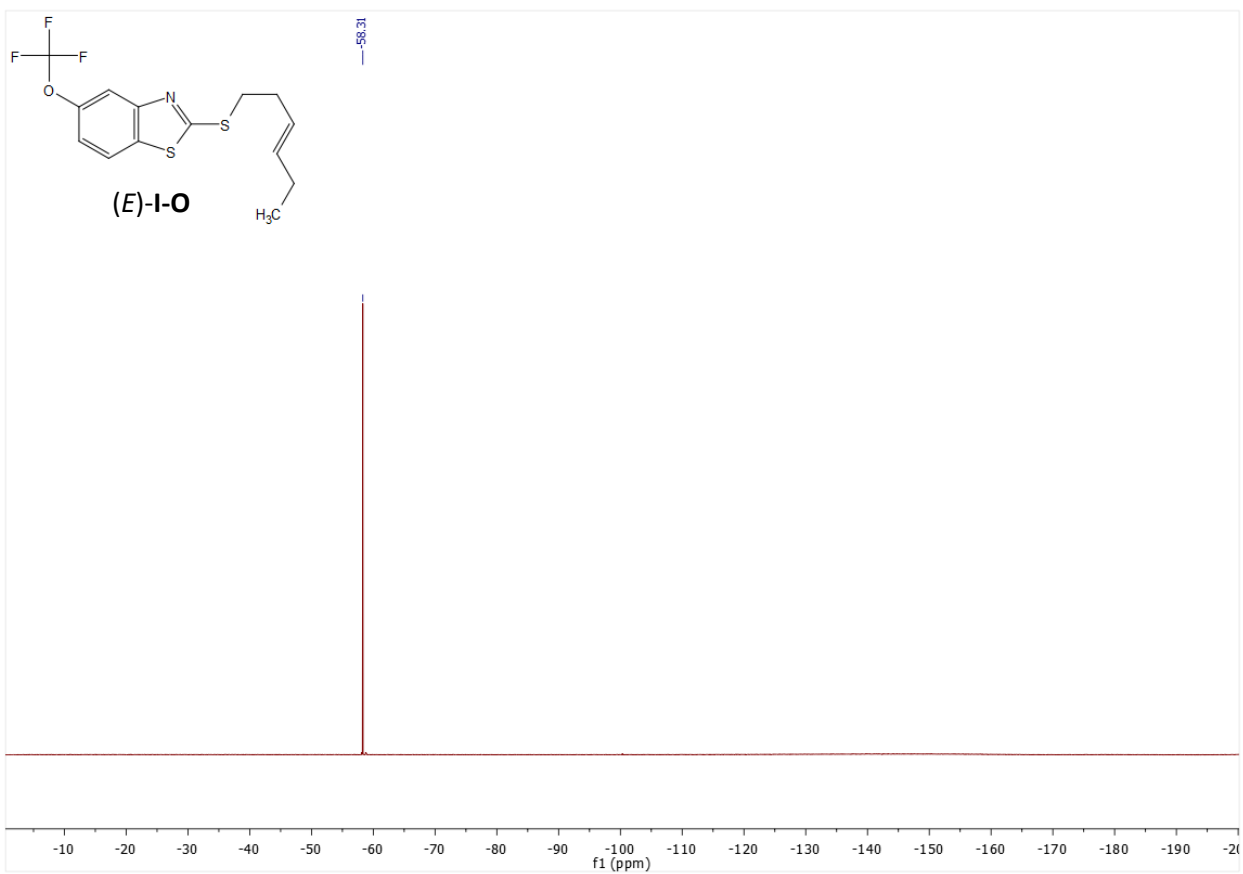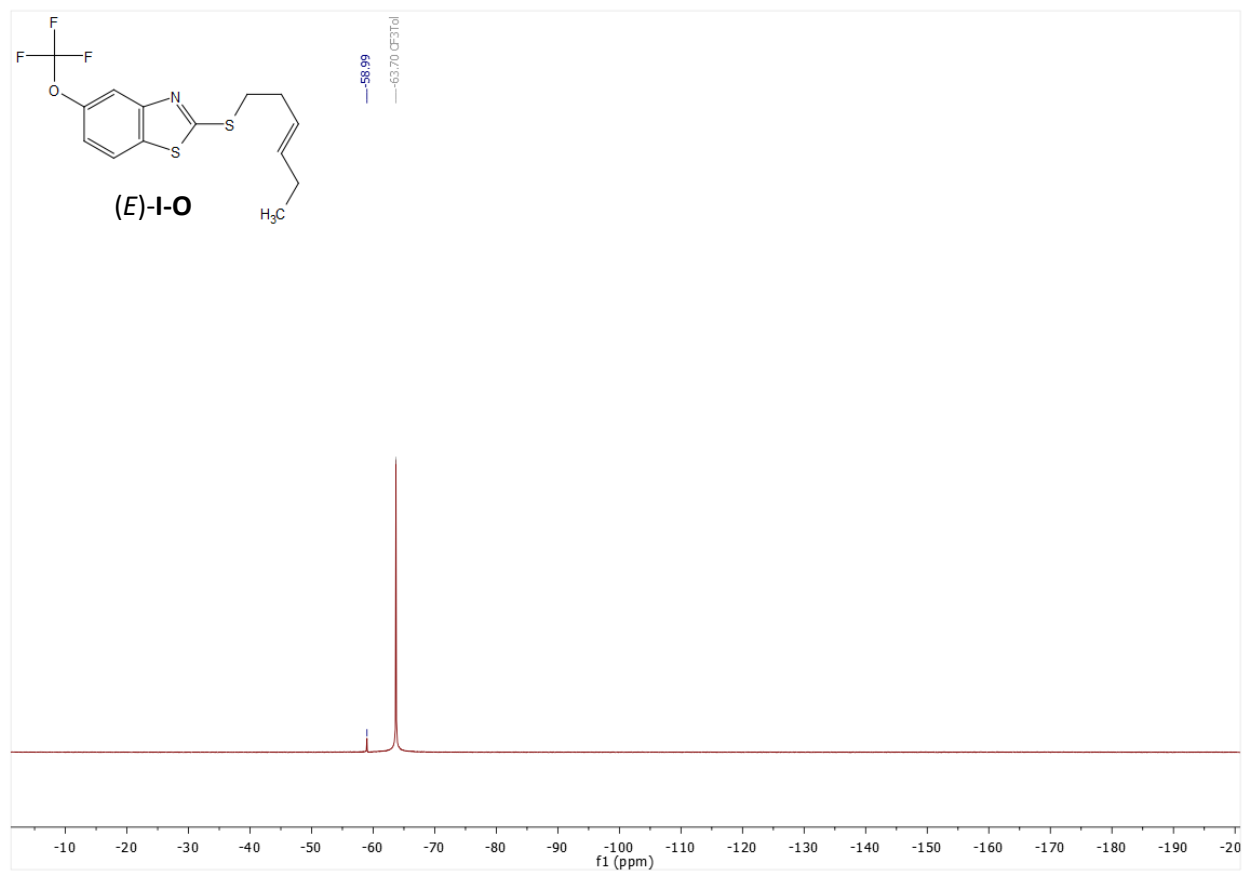

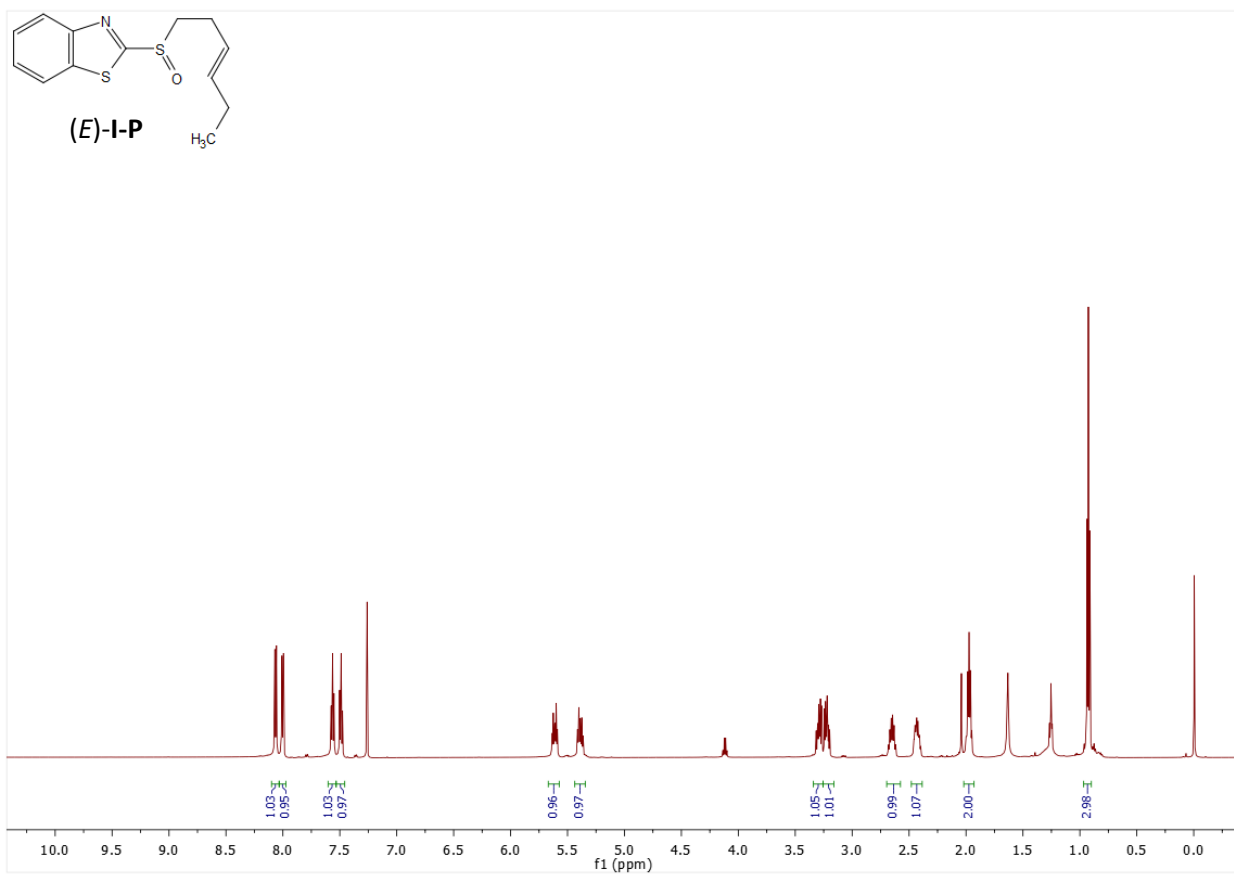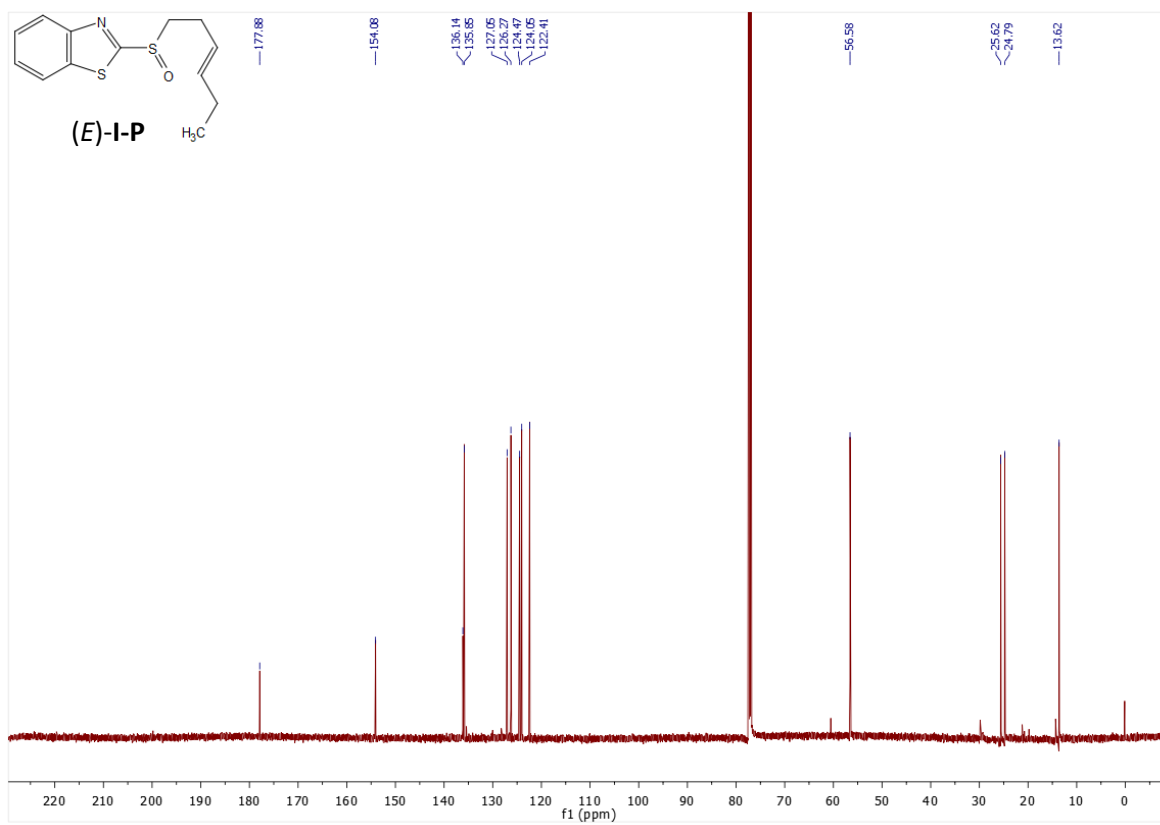

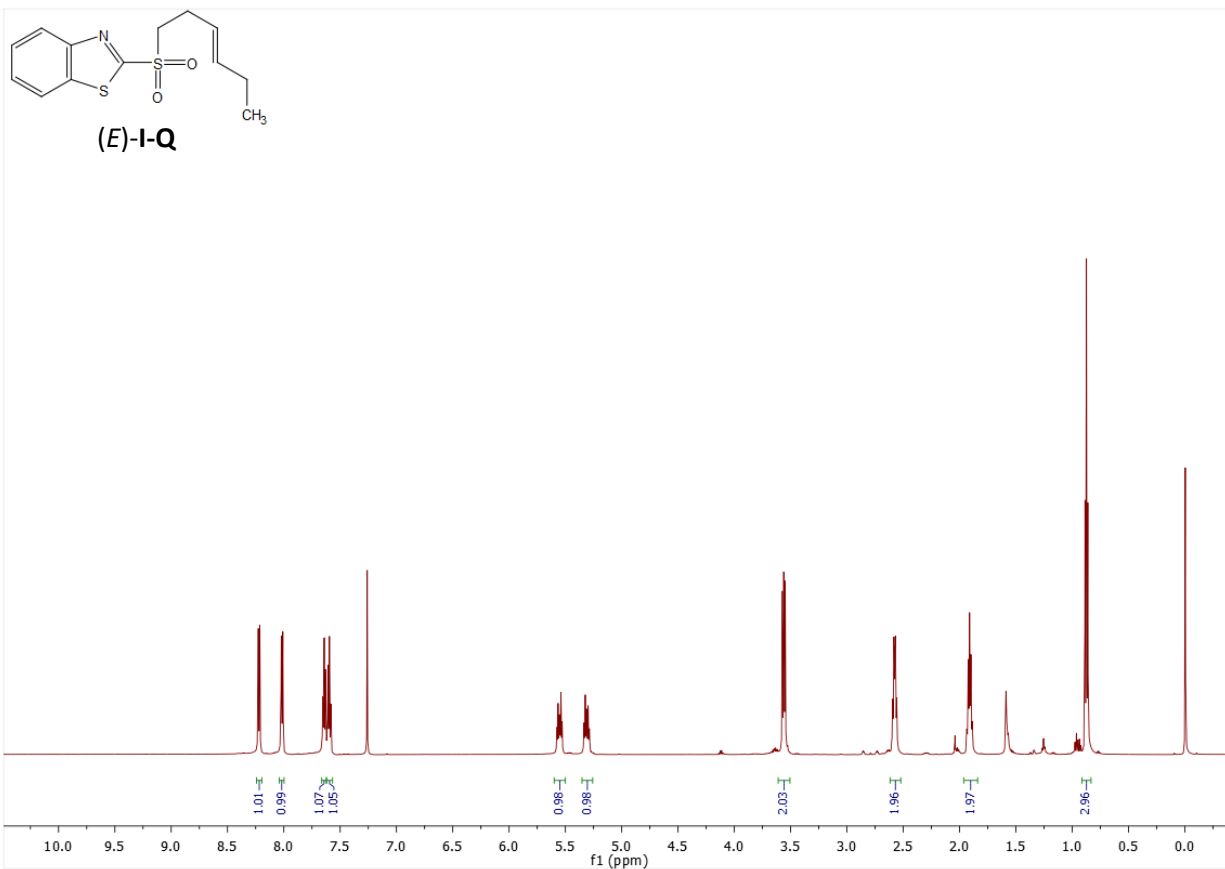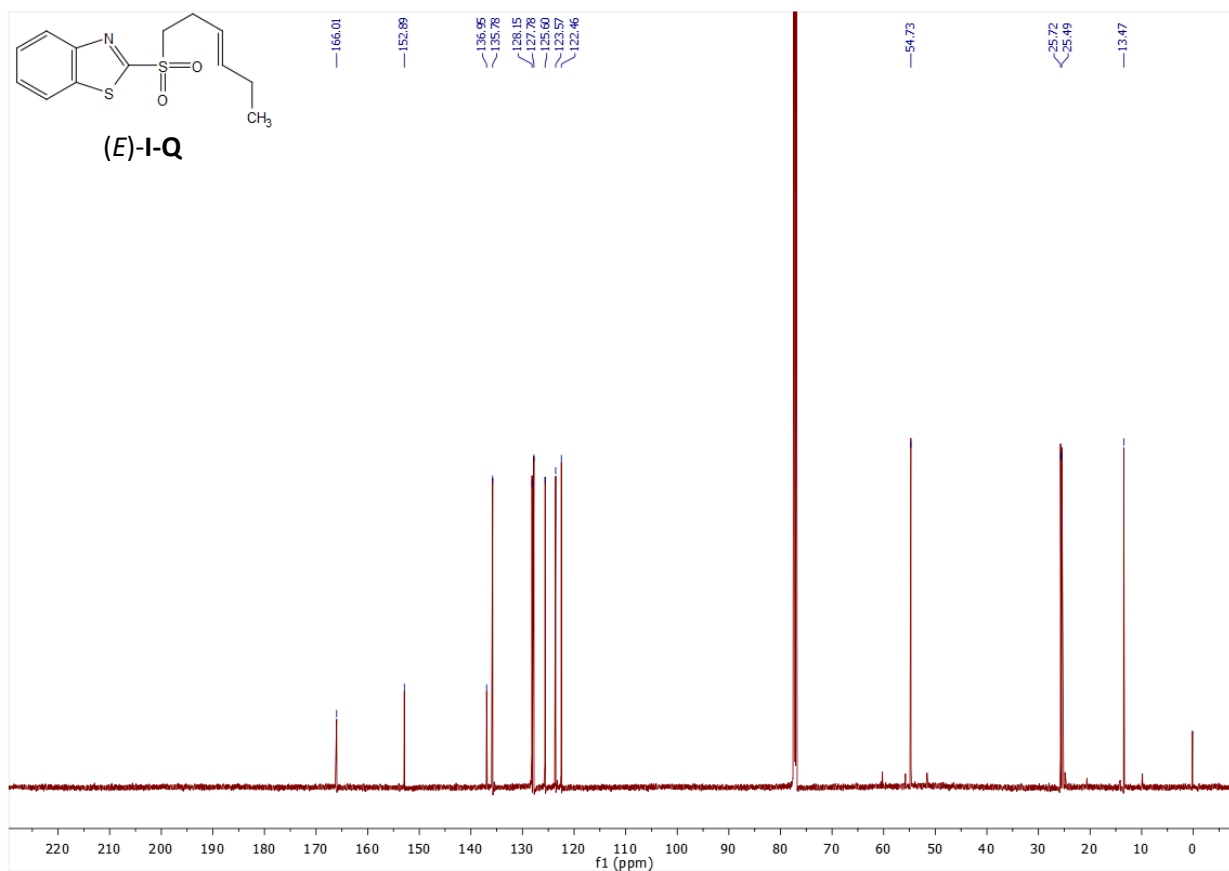

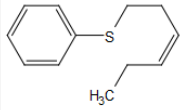

(Z)-I-B

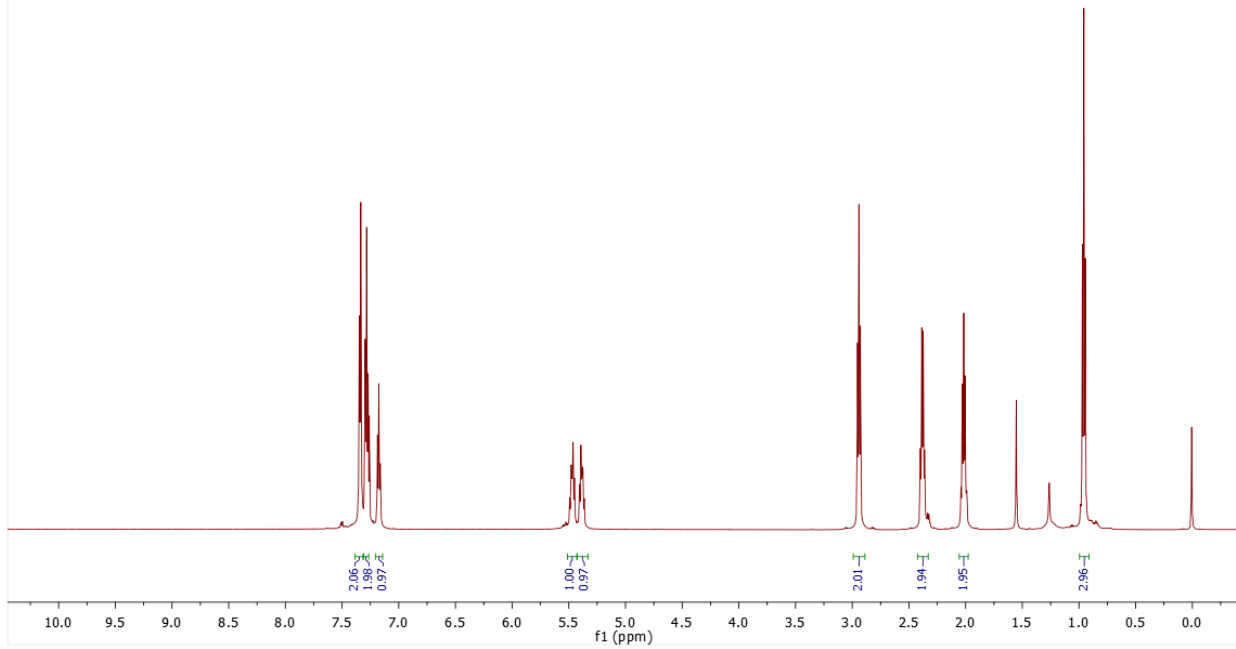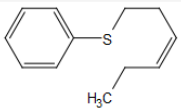

(Z)-I-B

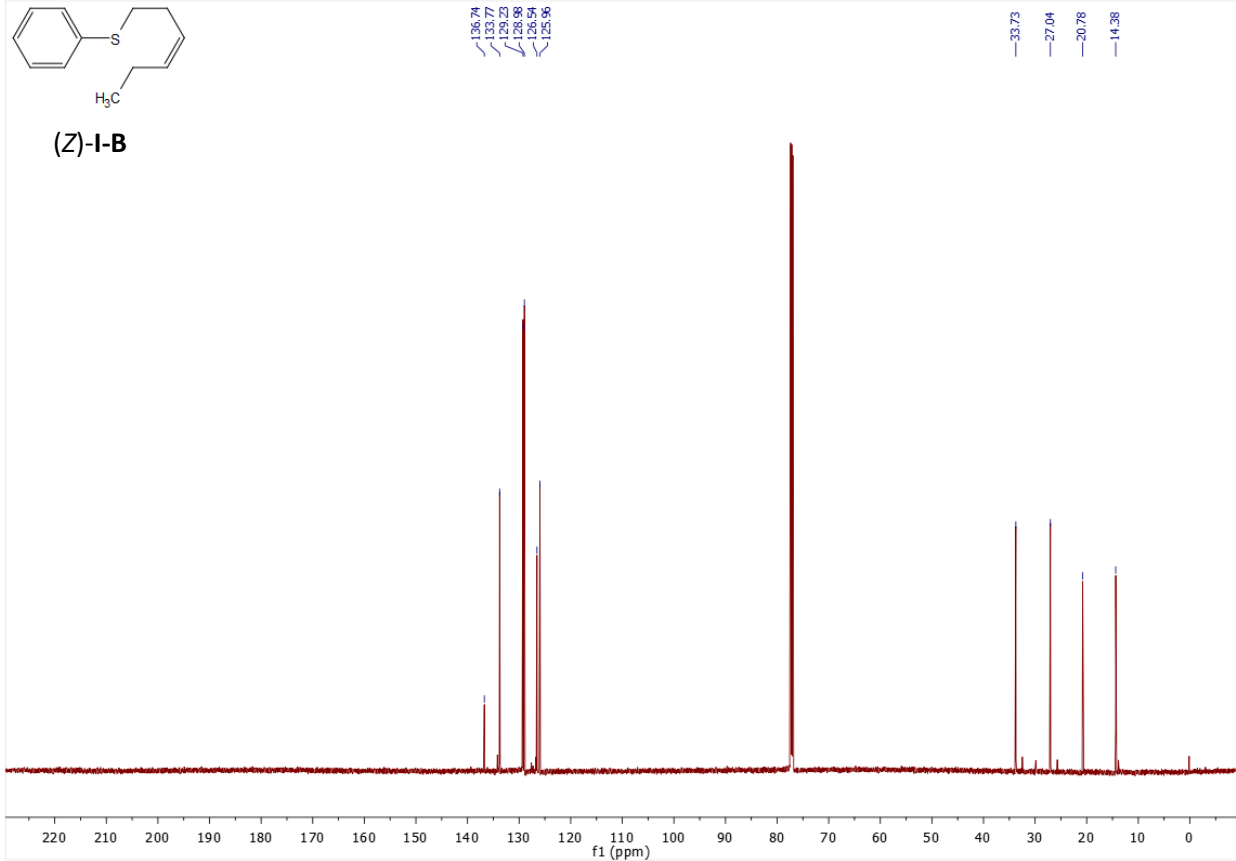

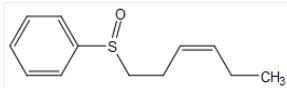

(Z)-I-C

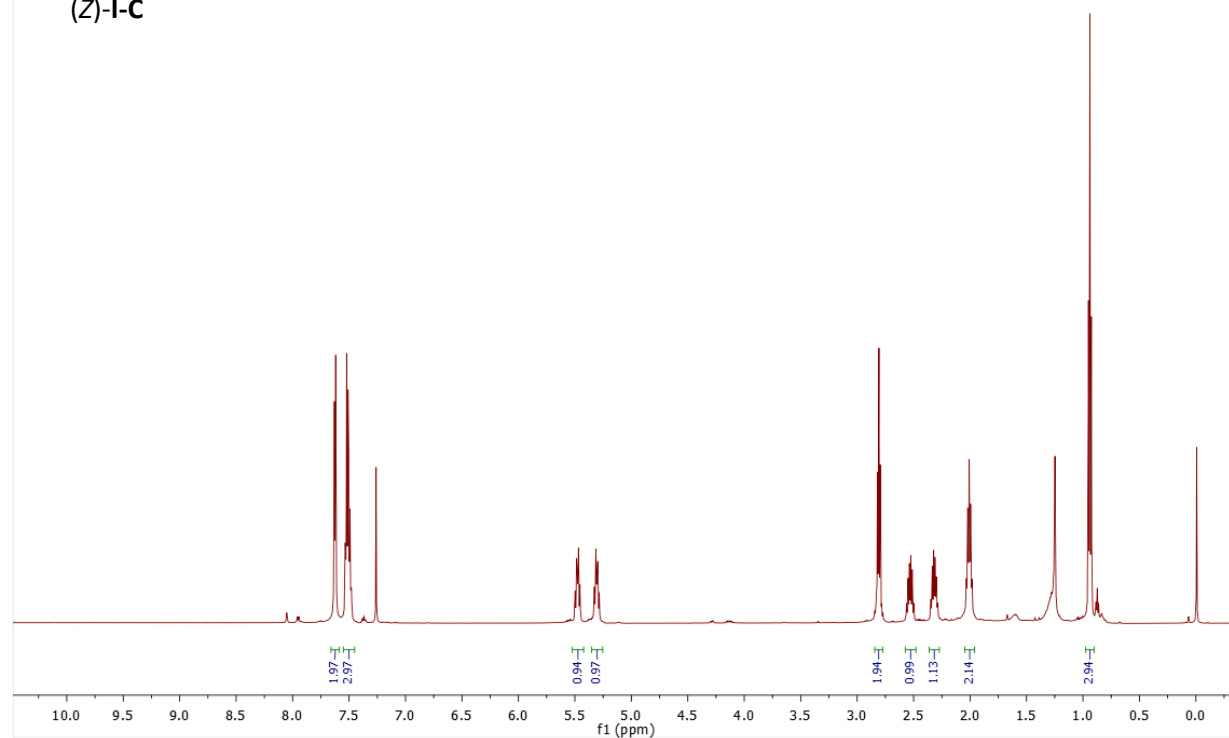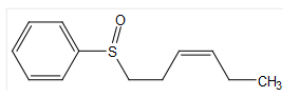

(Z)-I-C

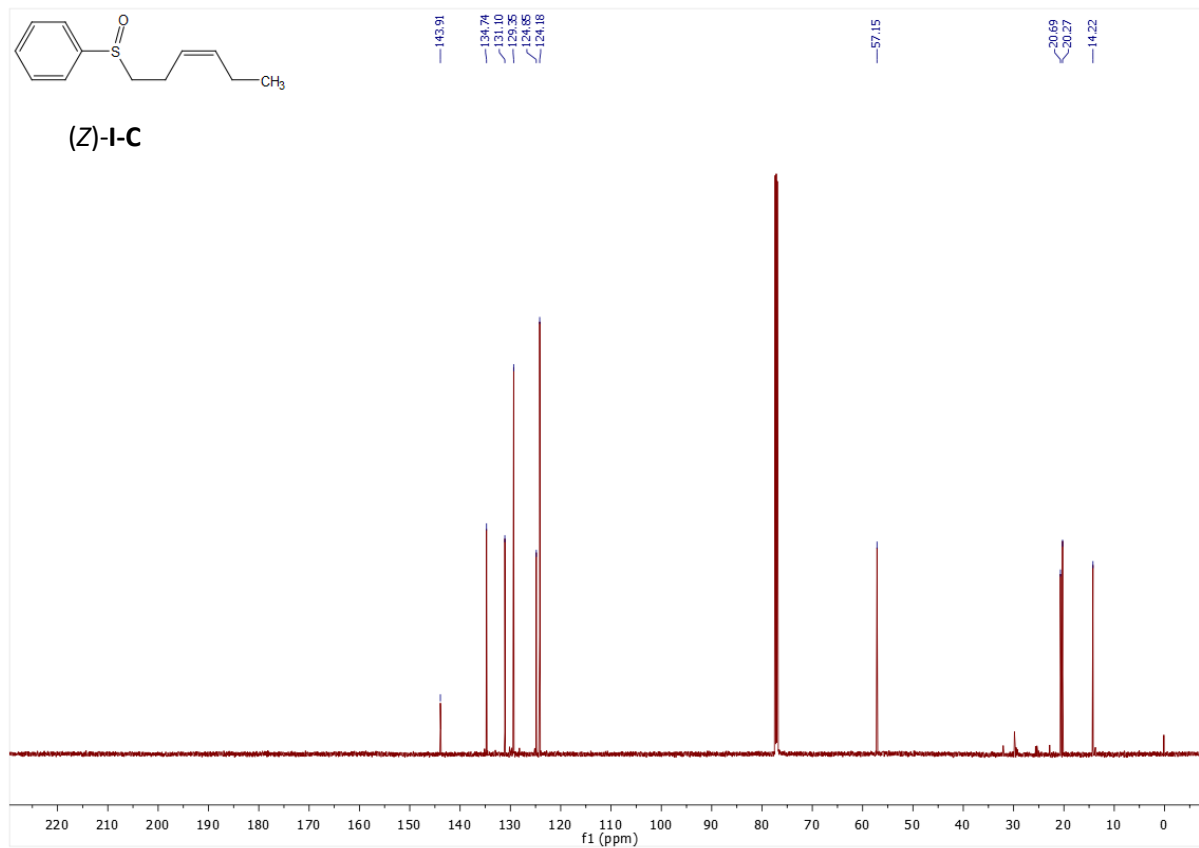

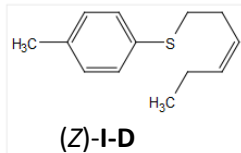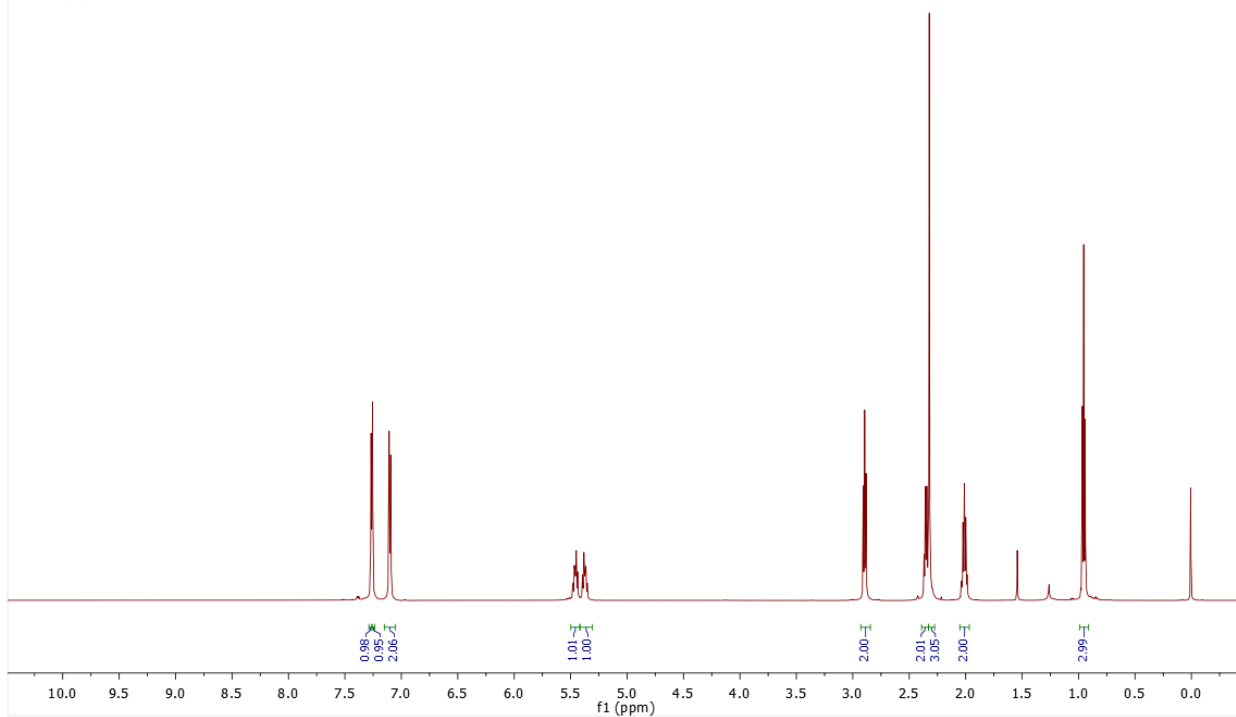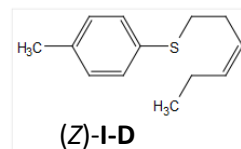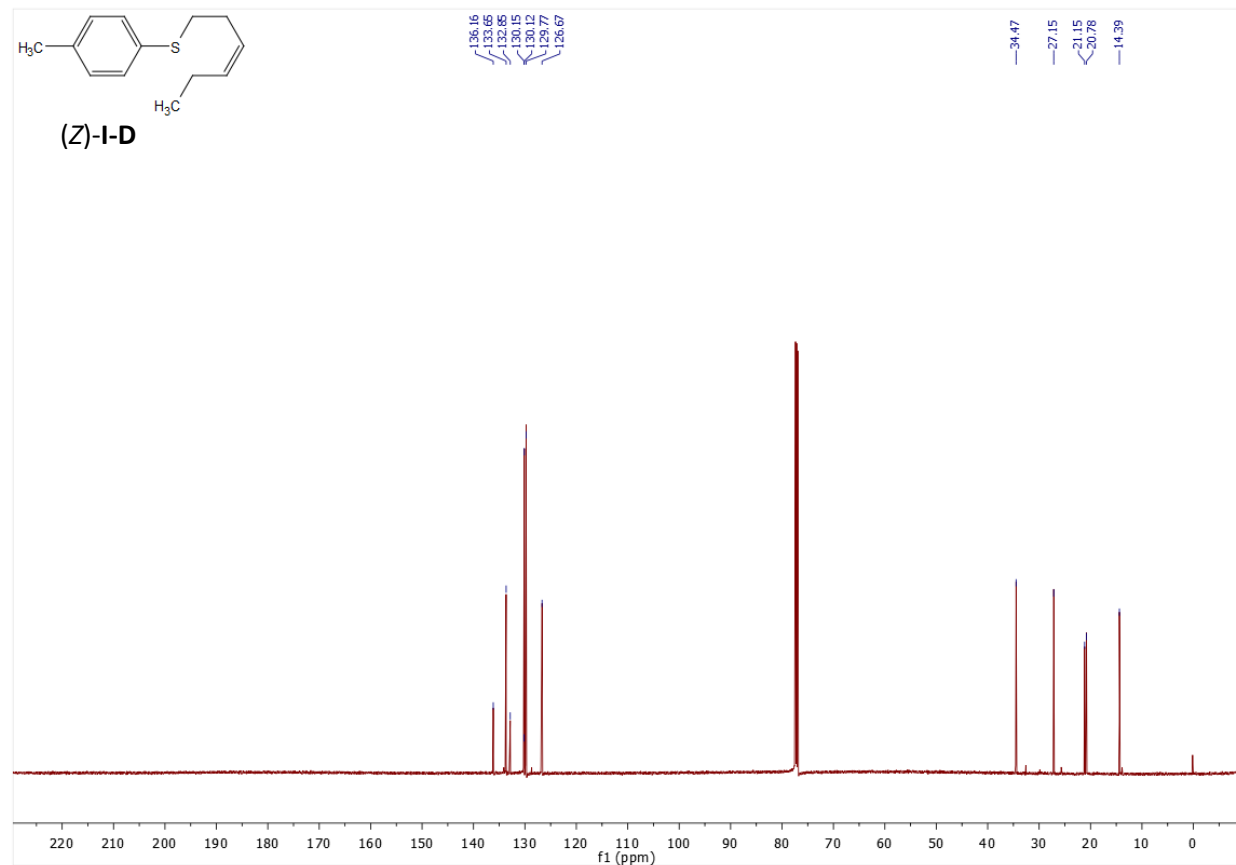

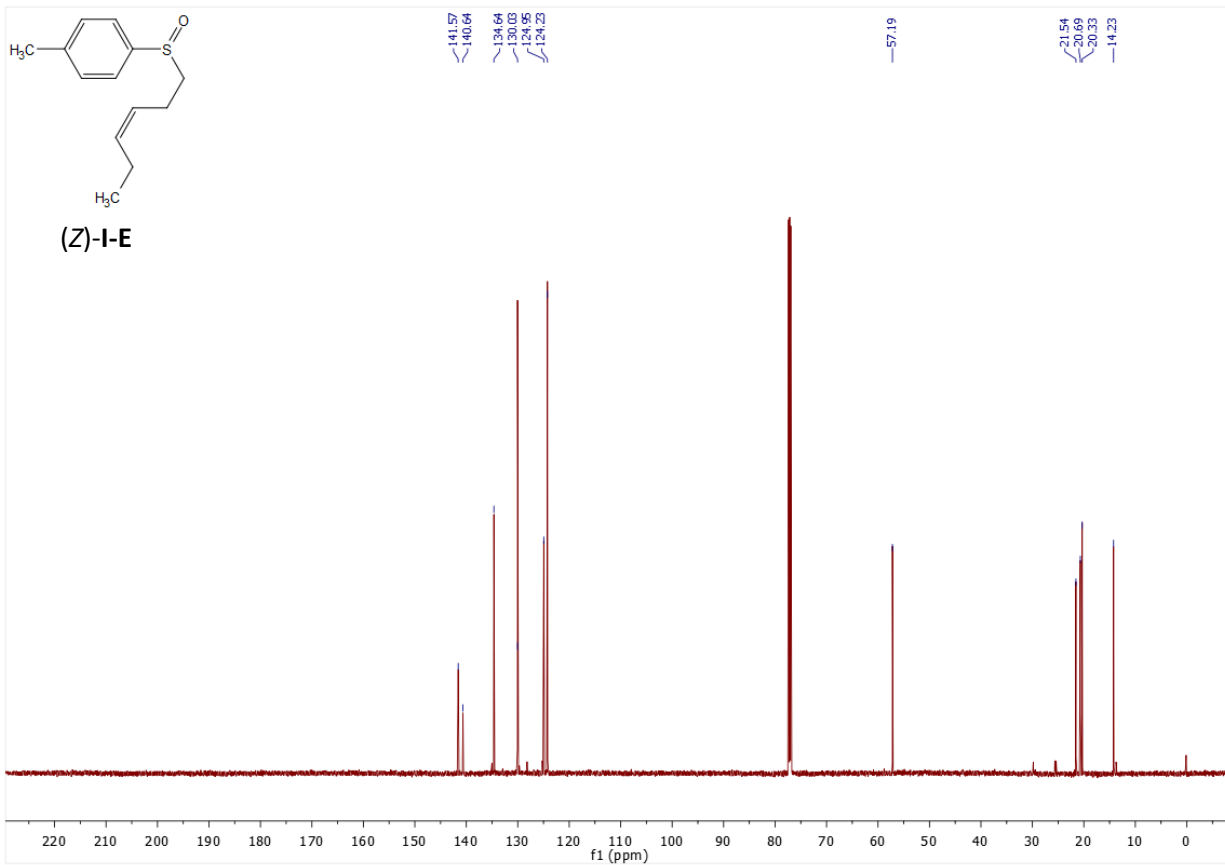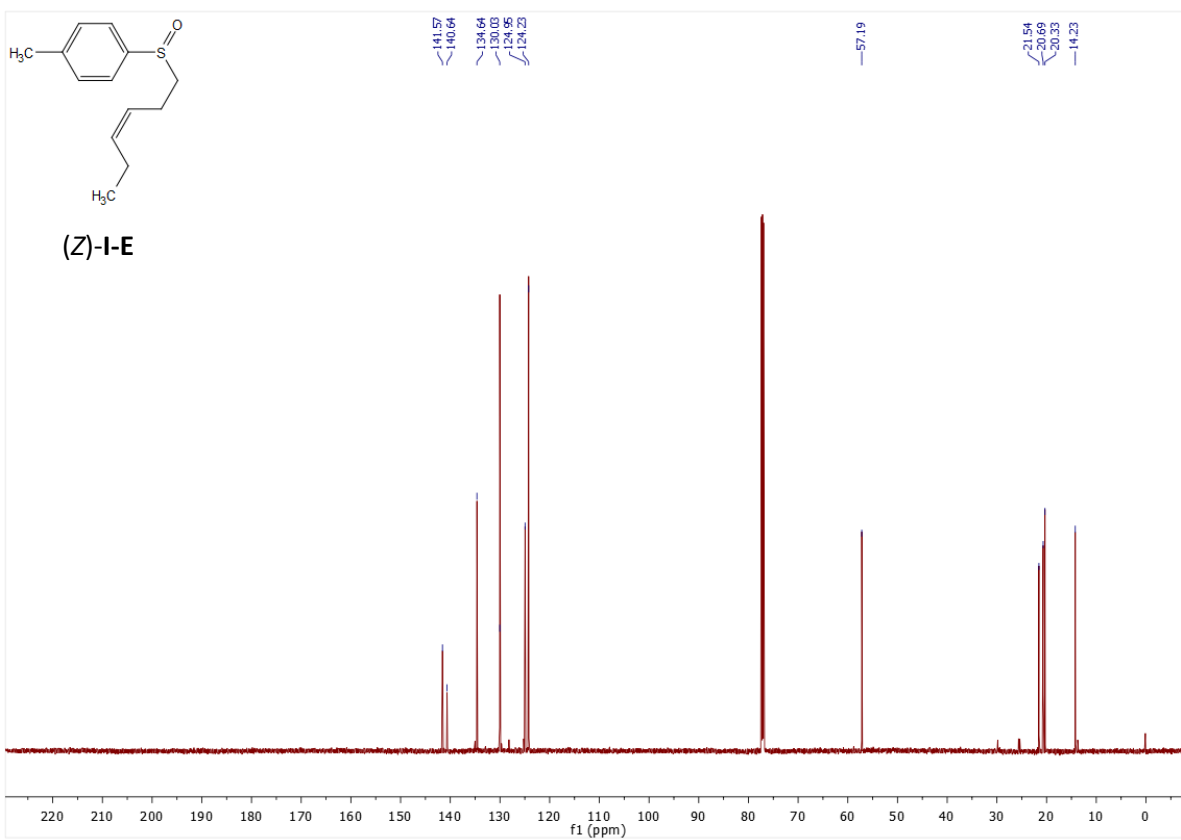



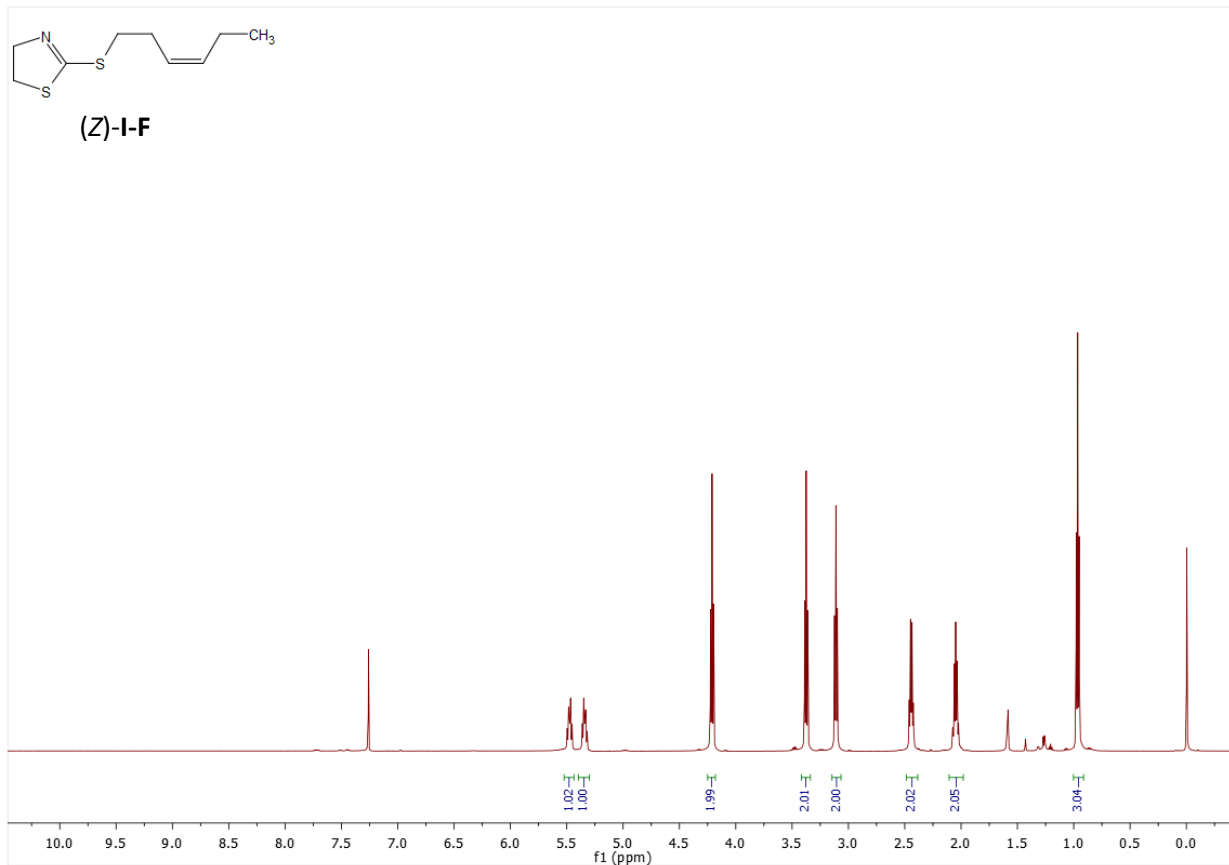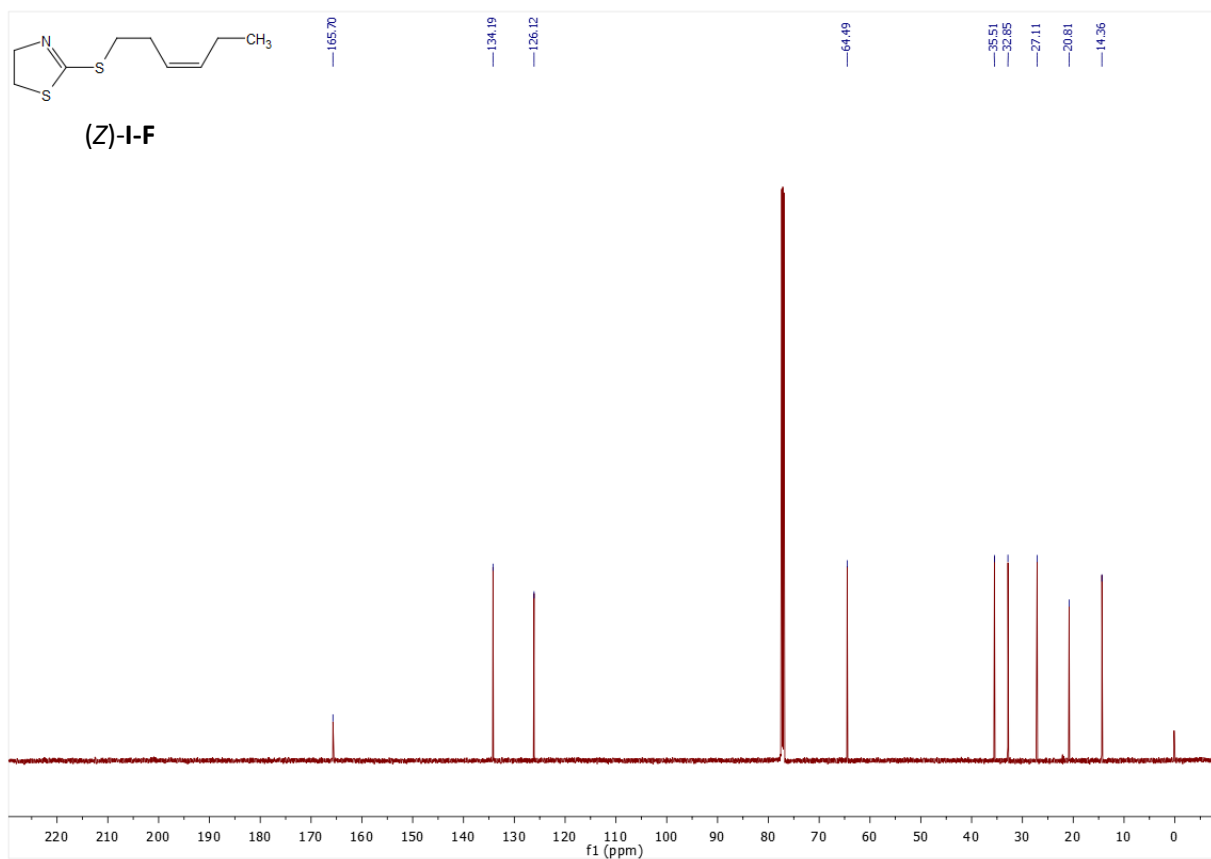

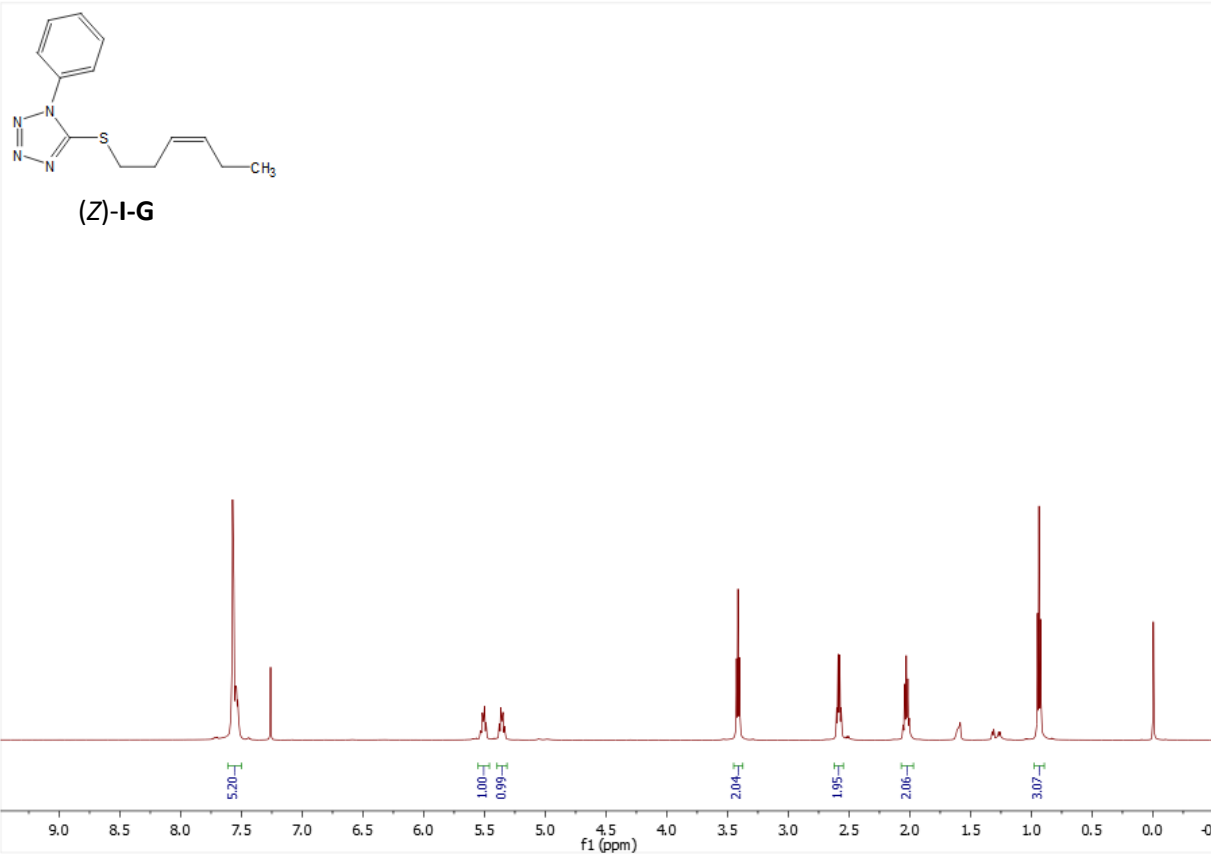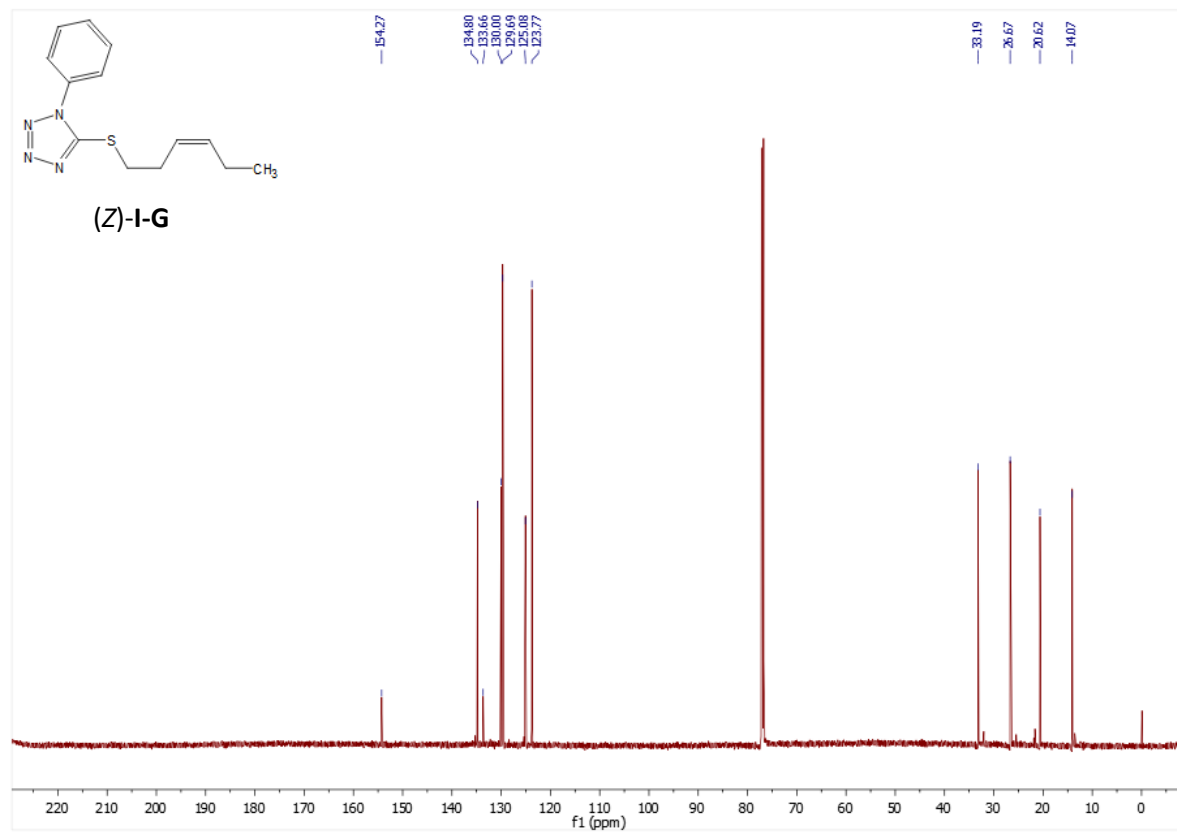

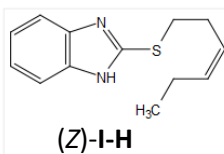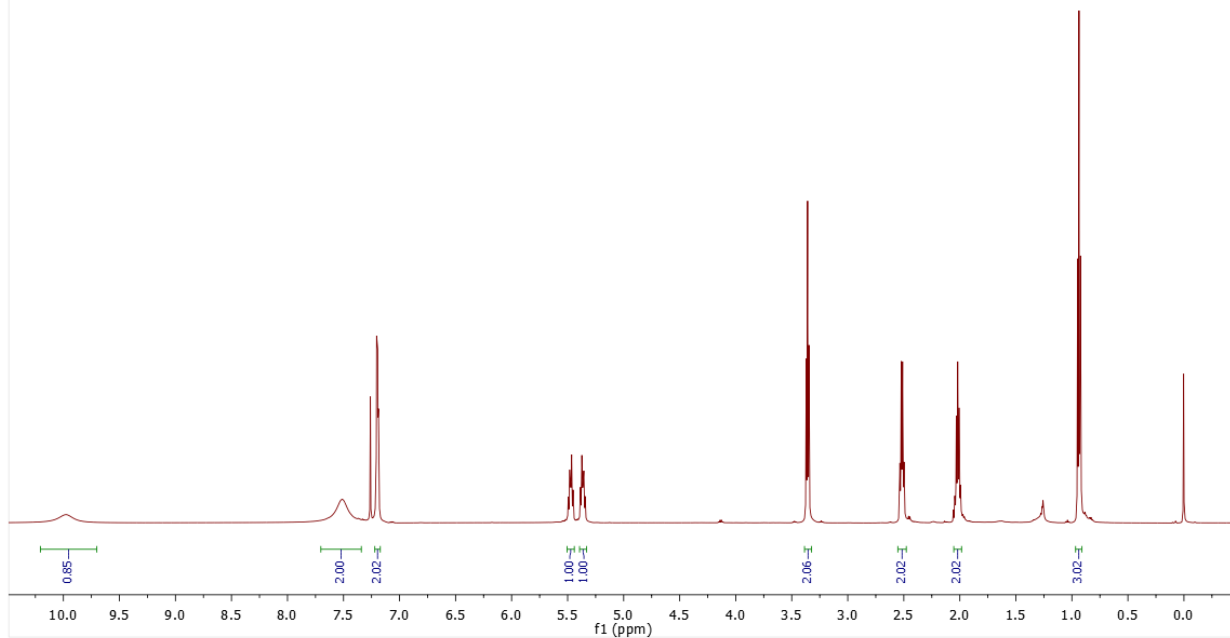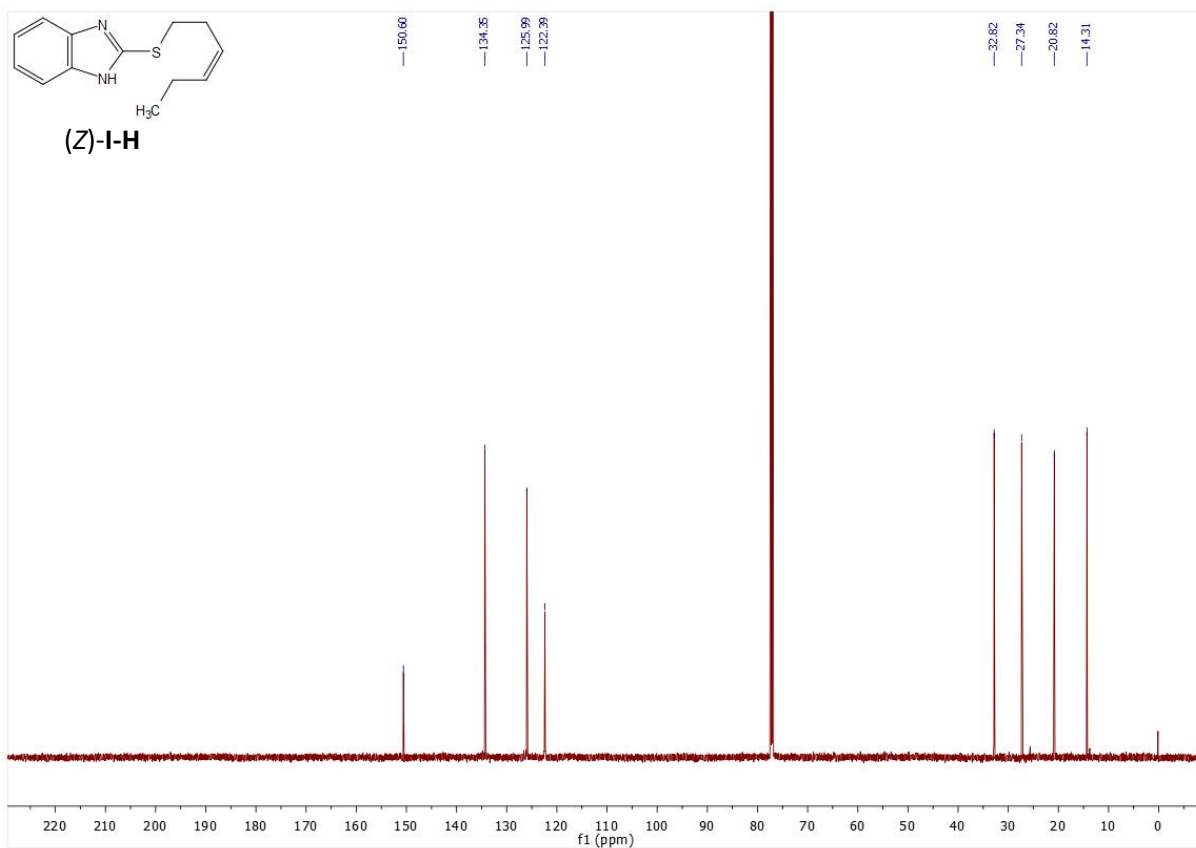

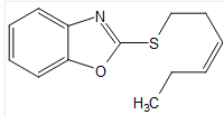

(Z)-I-I

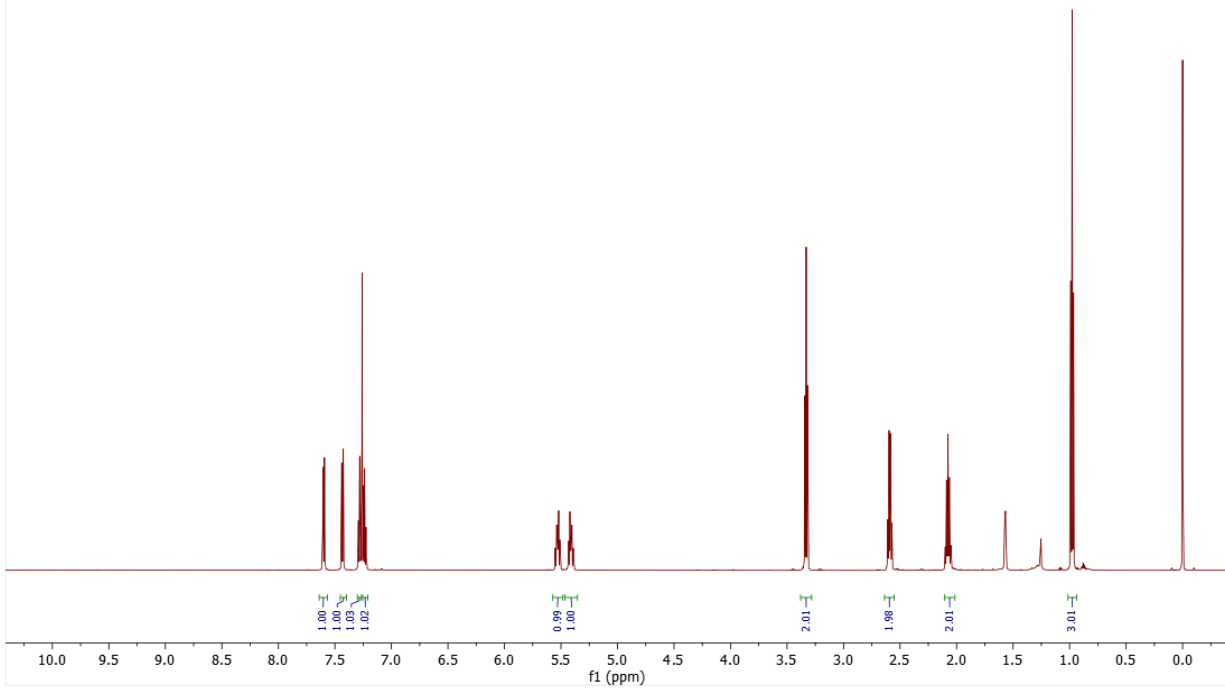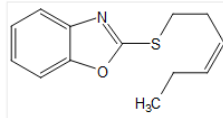

(Z)-I-I

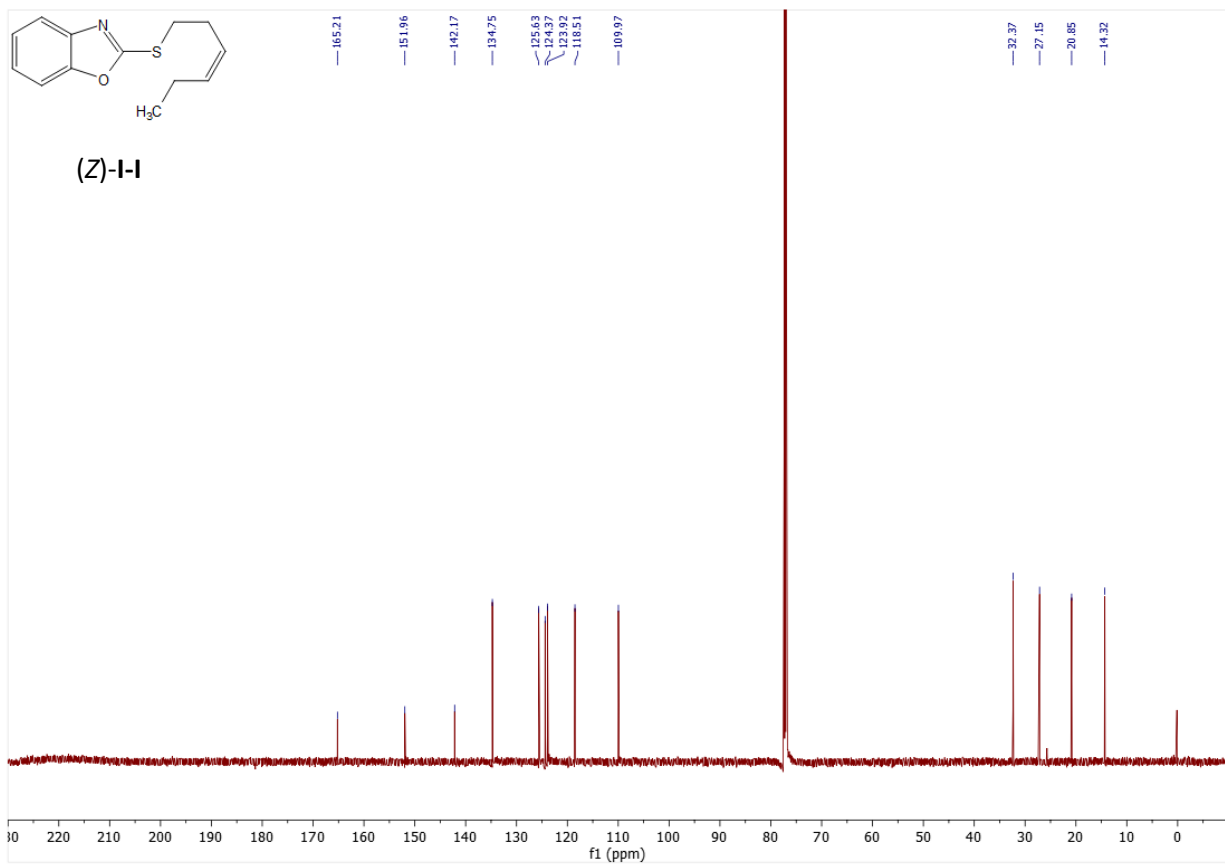

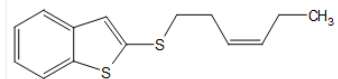

(Z)-I-J

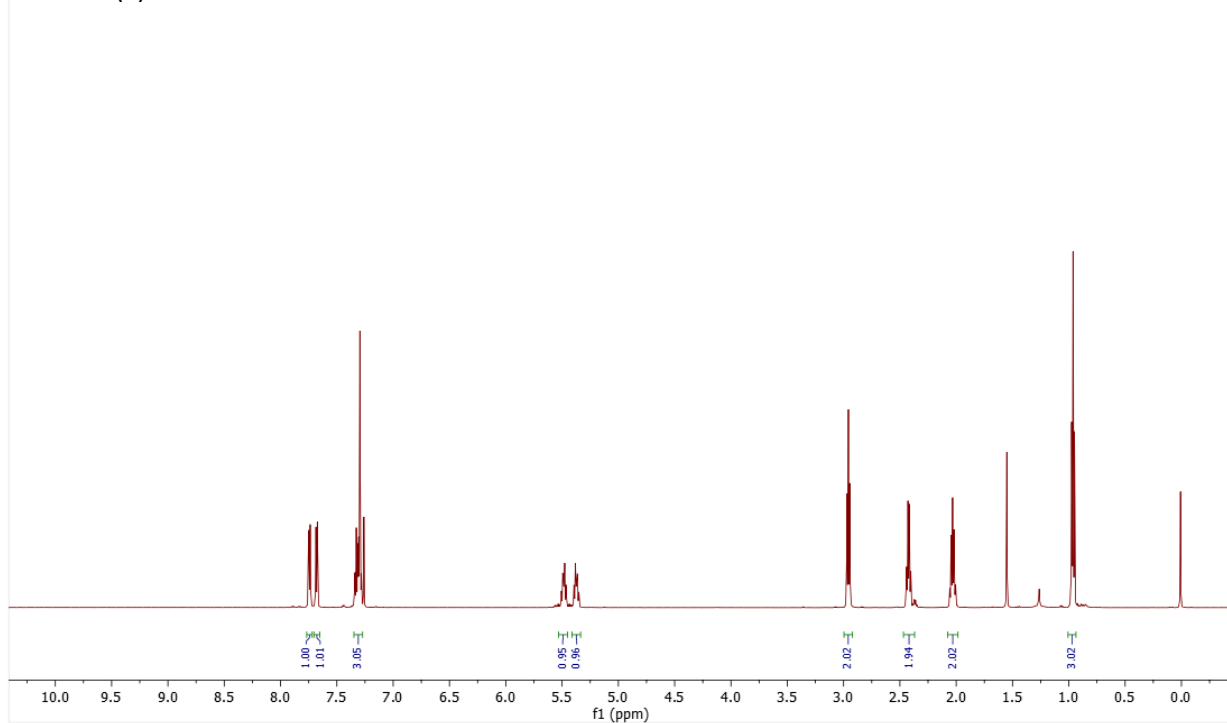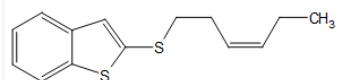

(Z)-I-J

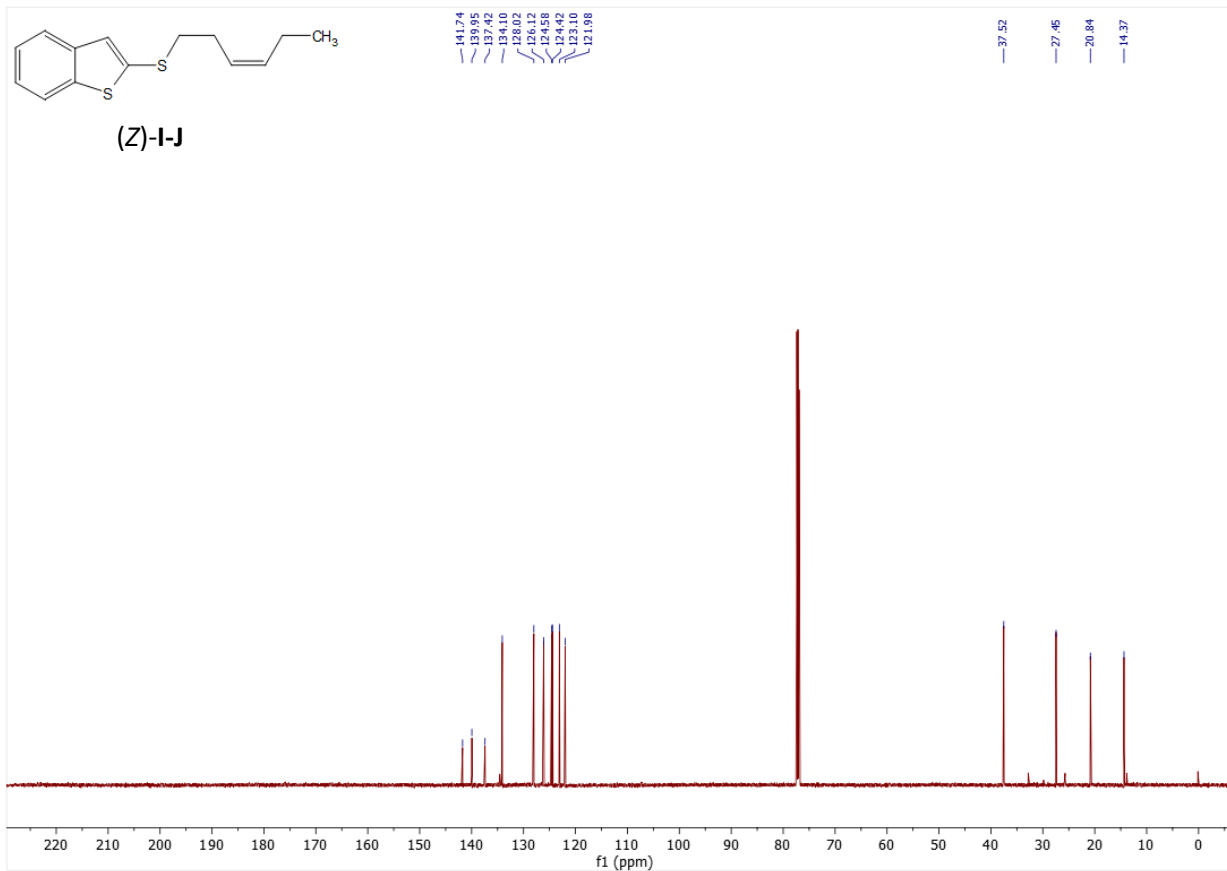

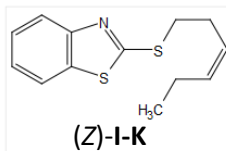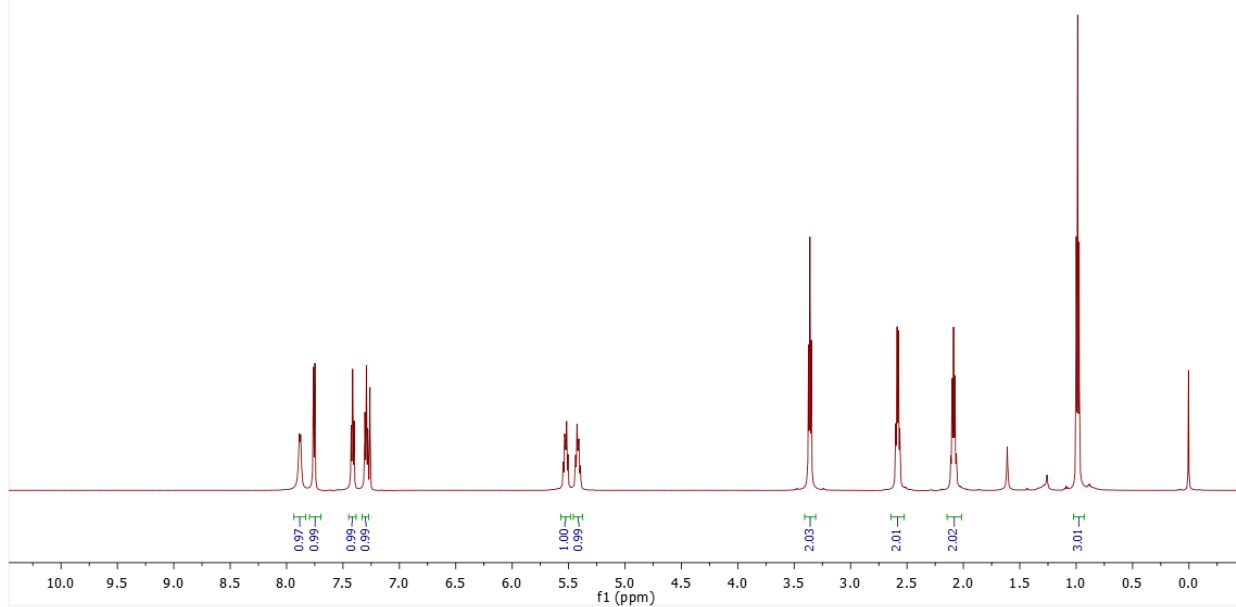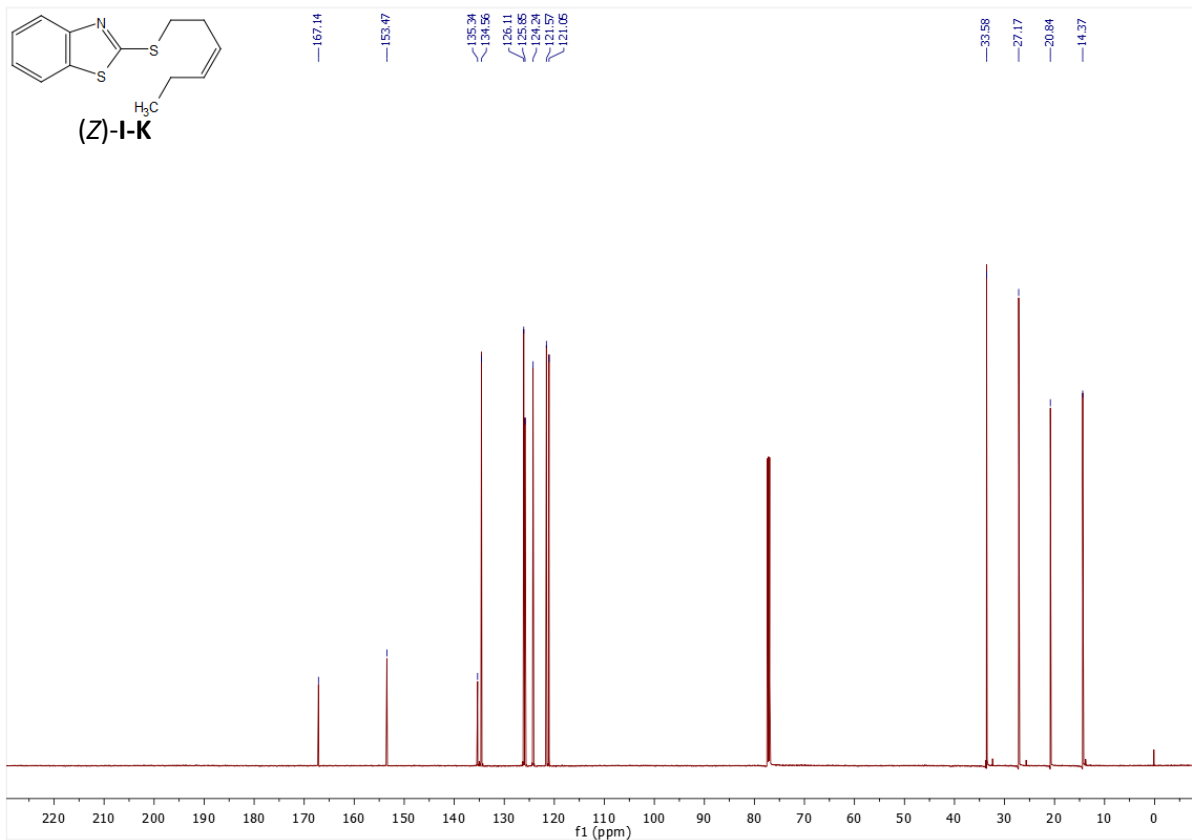

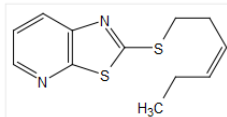

(Z)-I-L

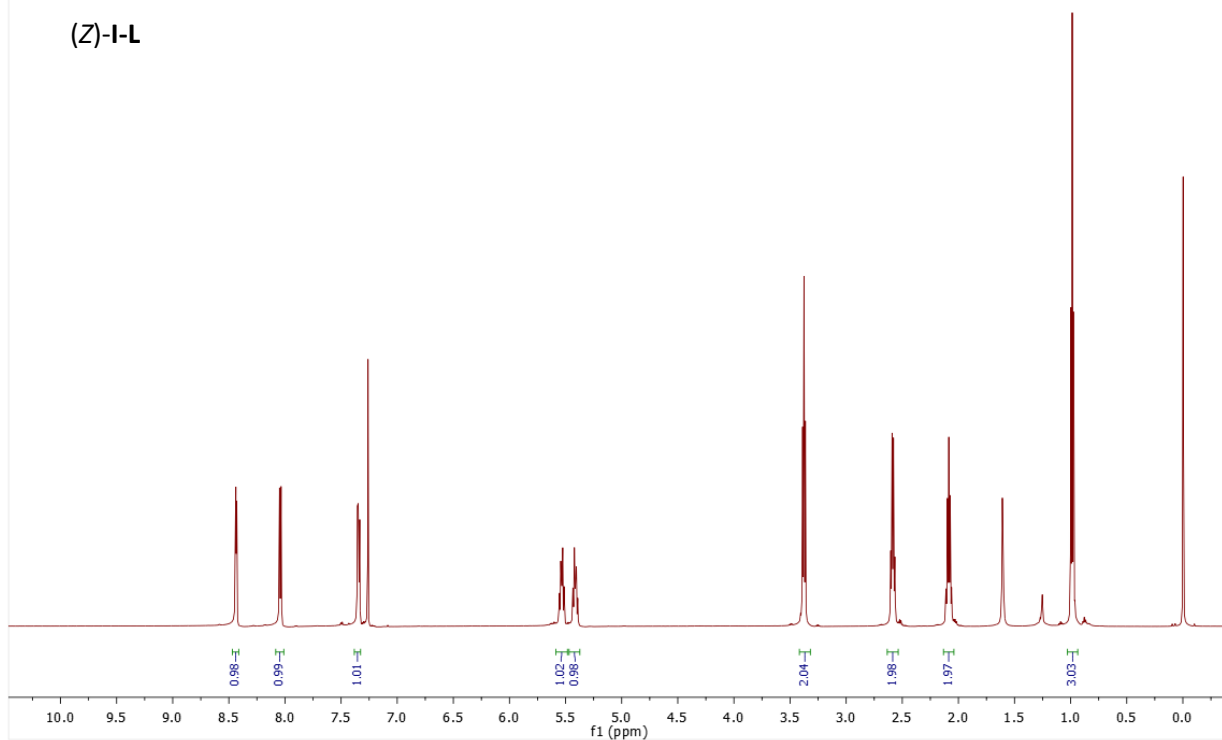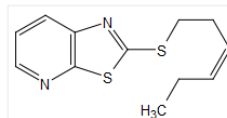

(Z)-I-L

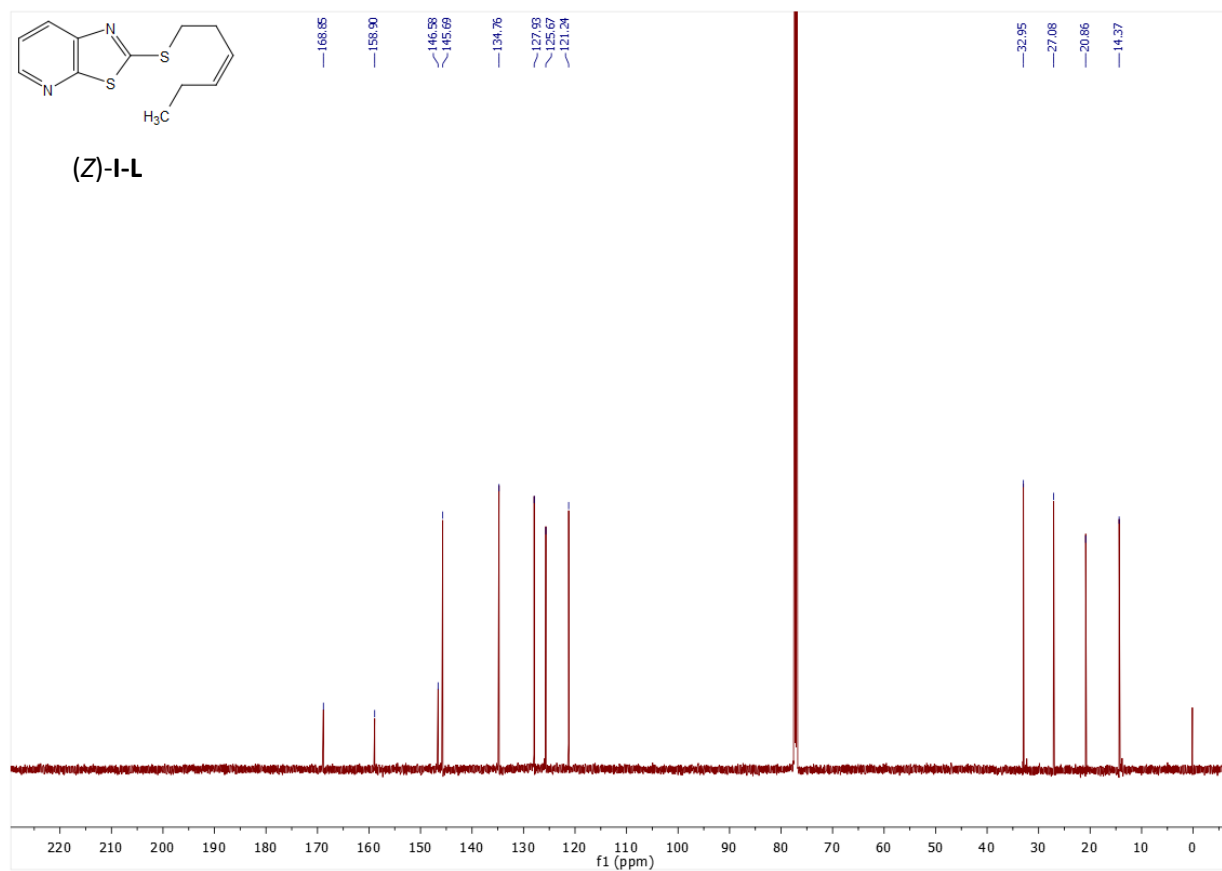

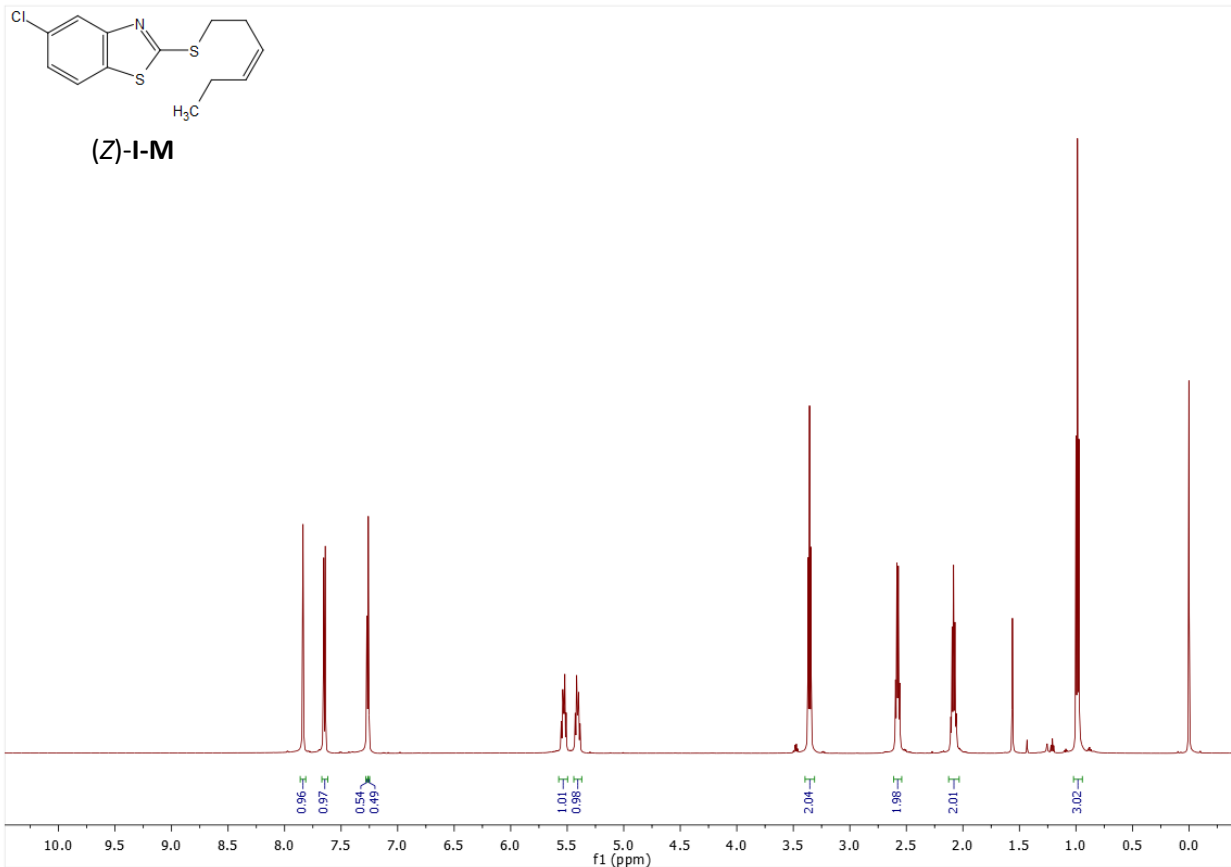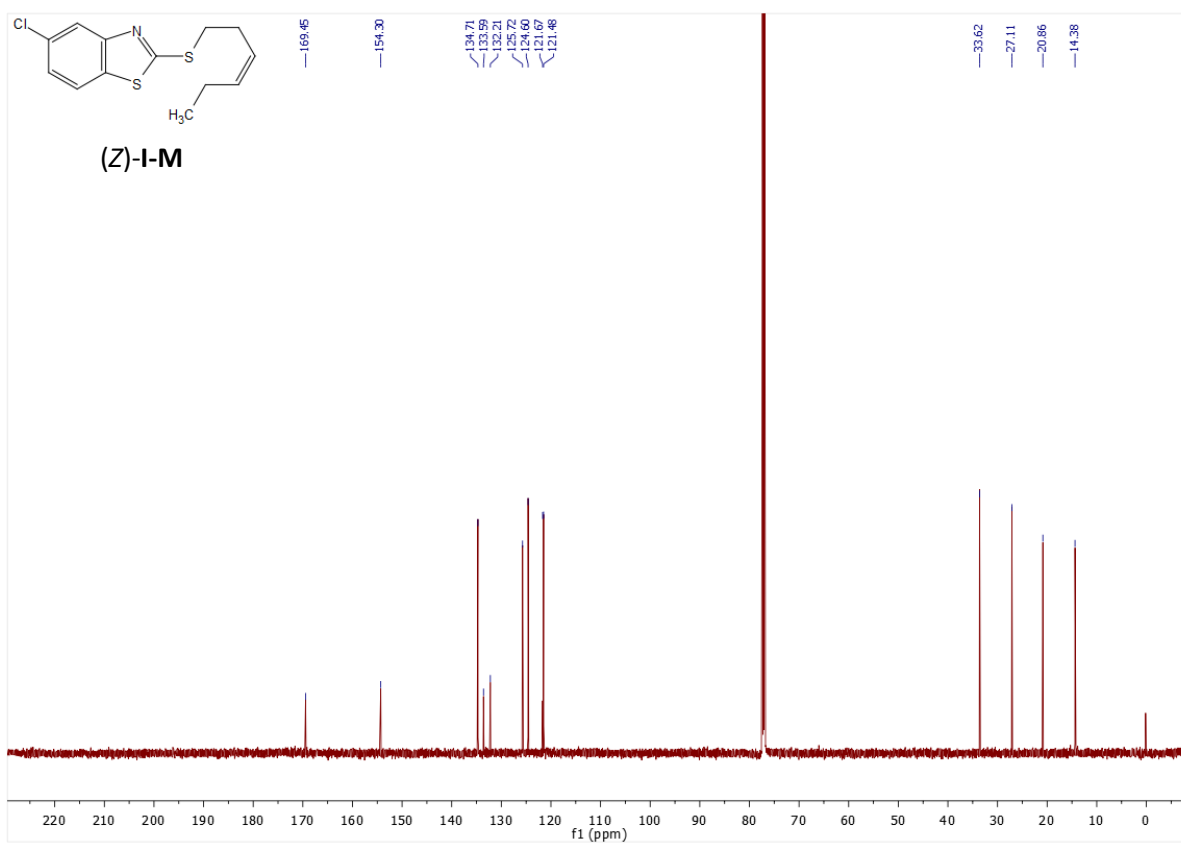



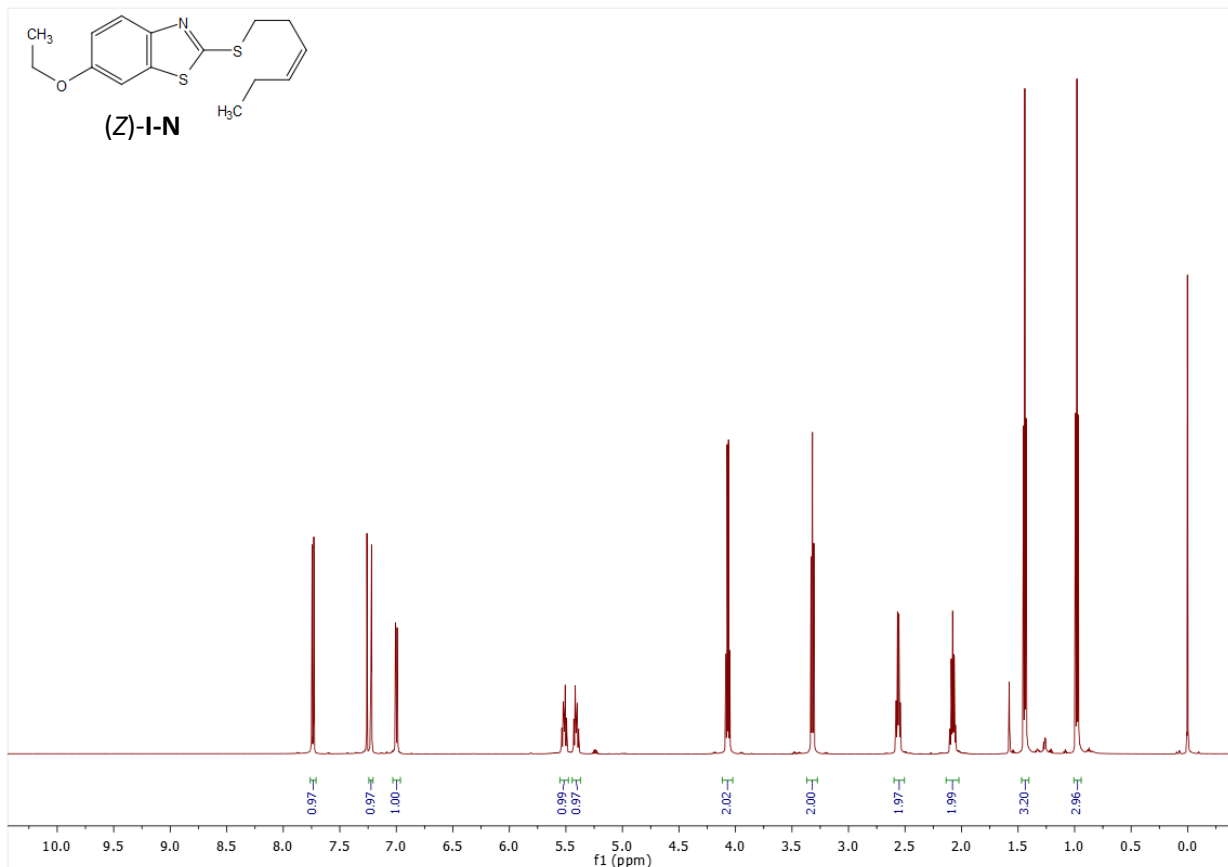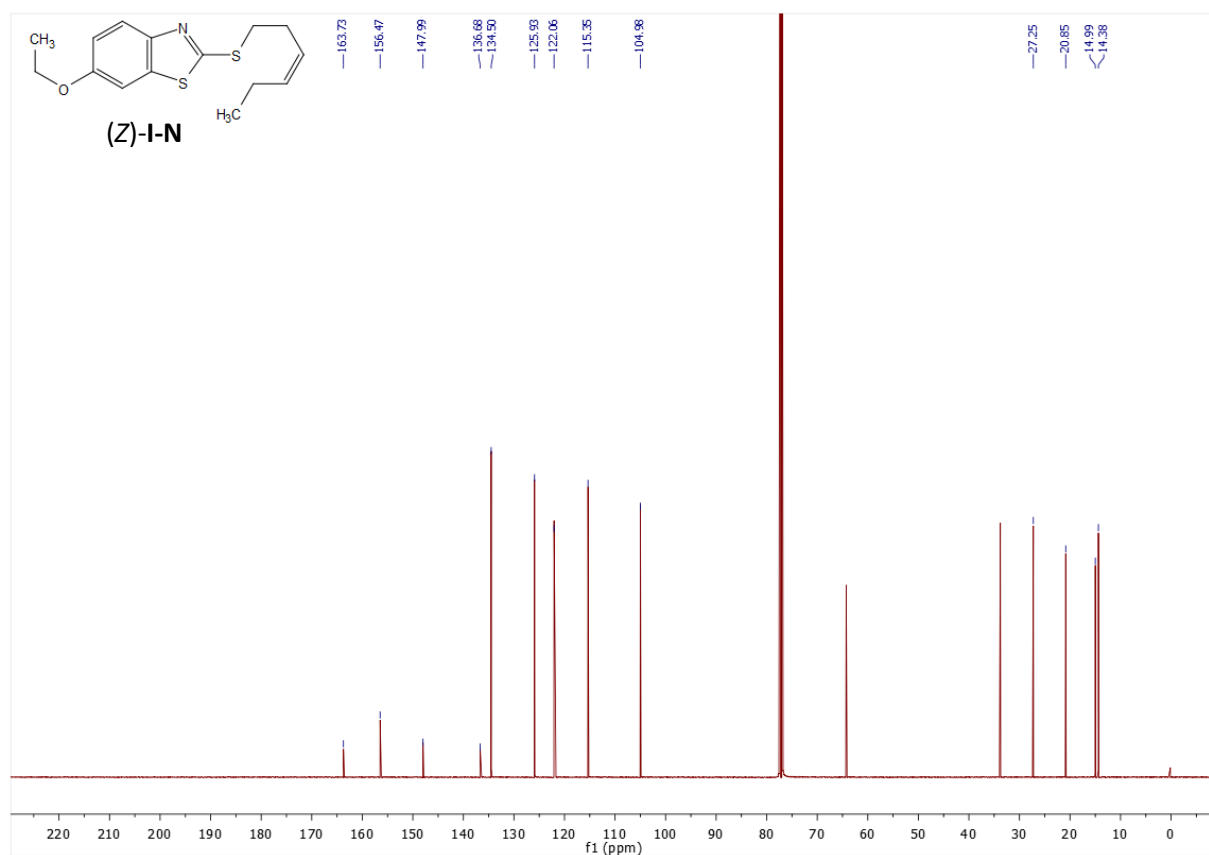

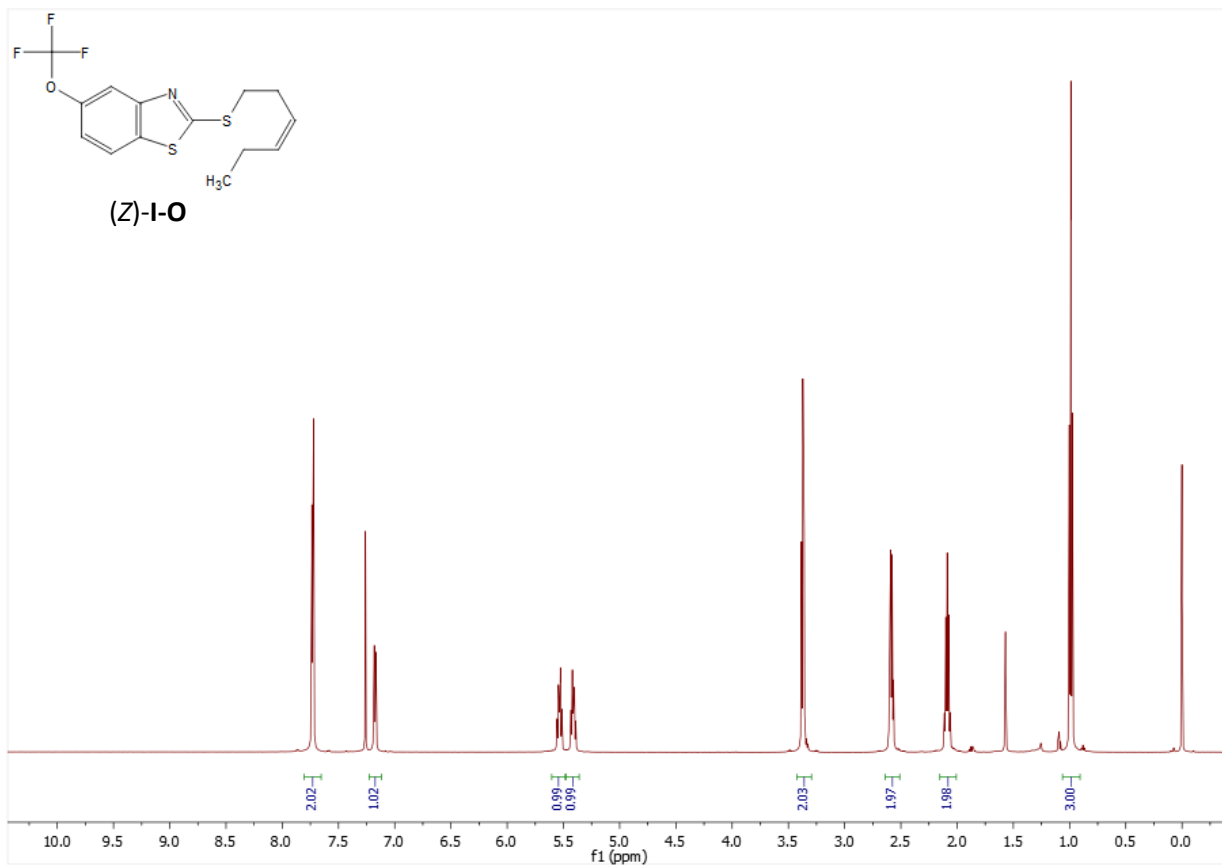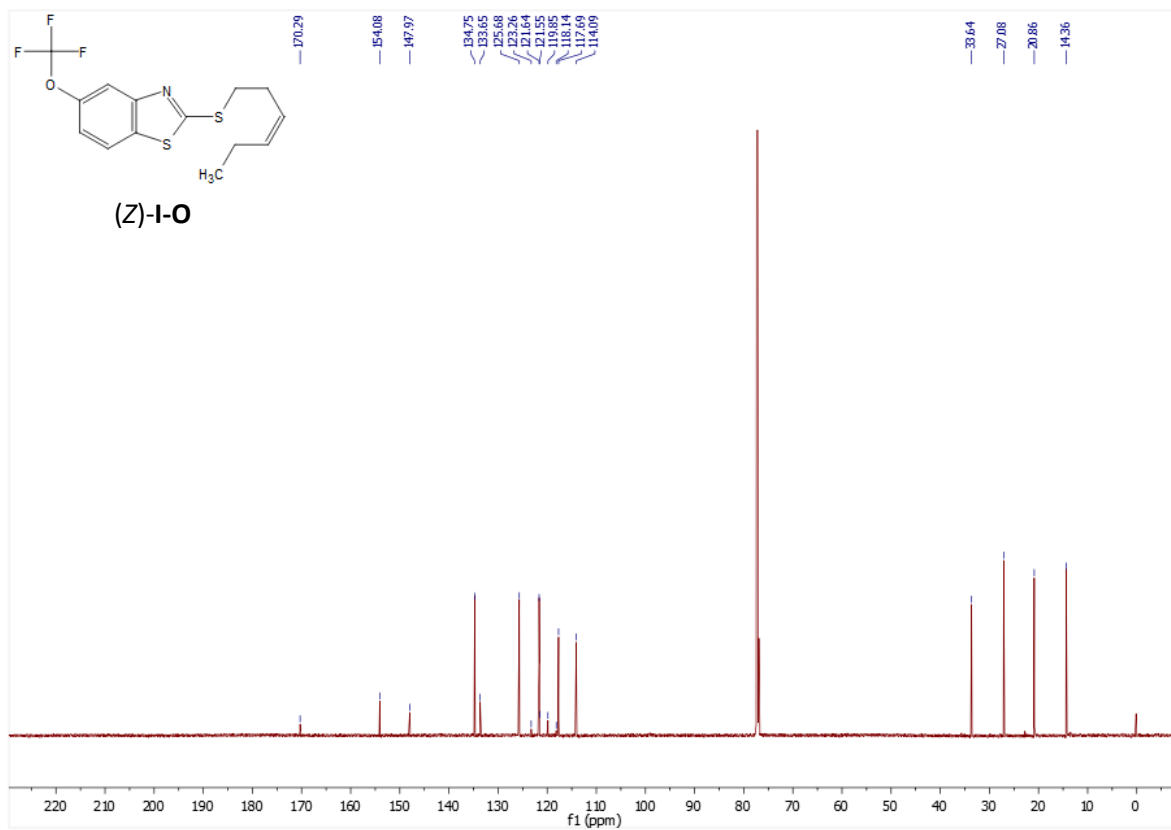

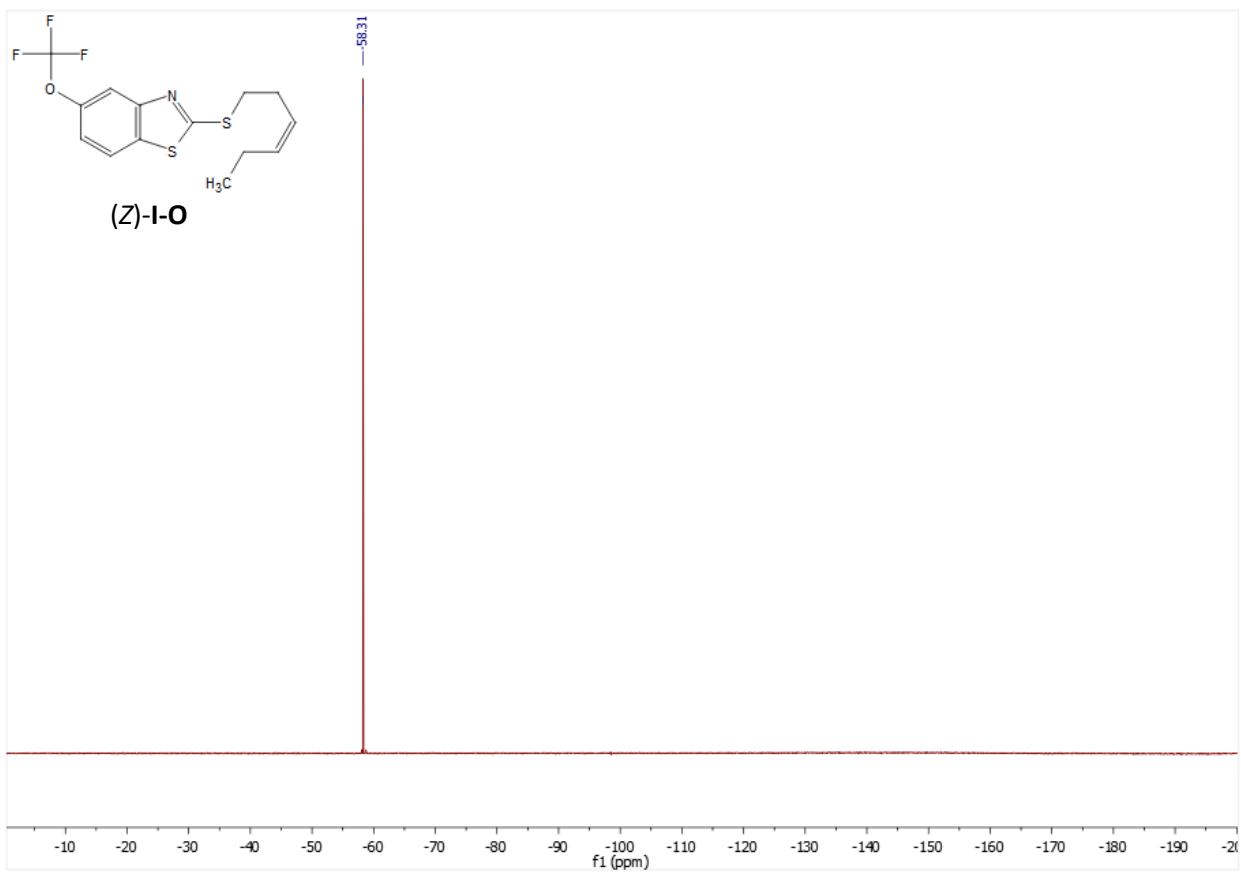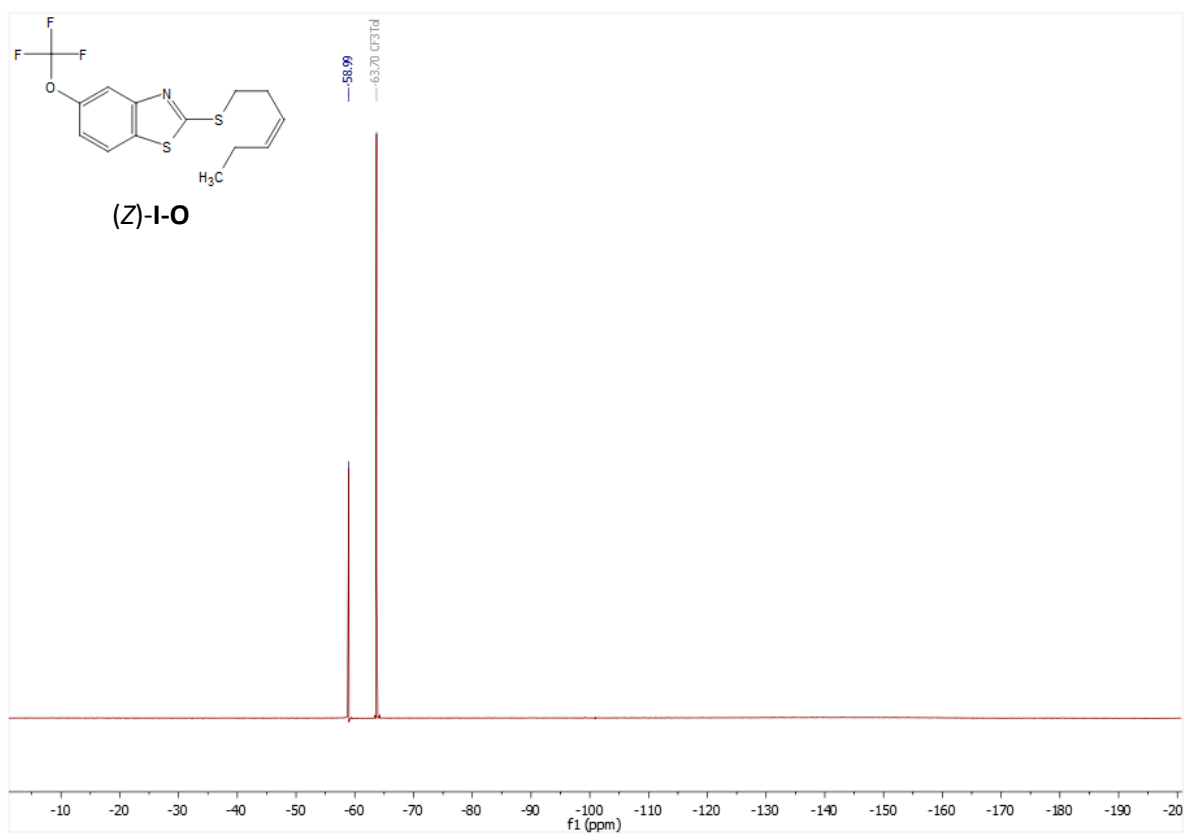

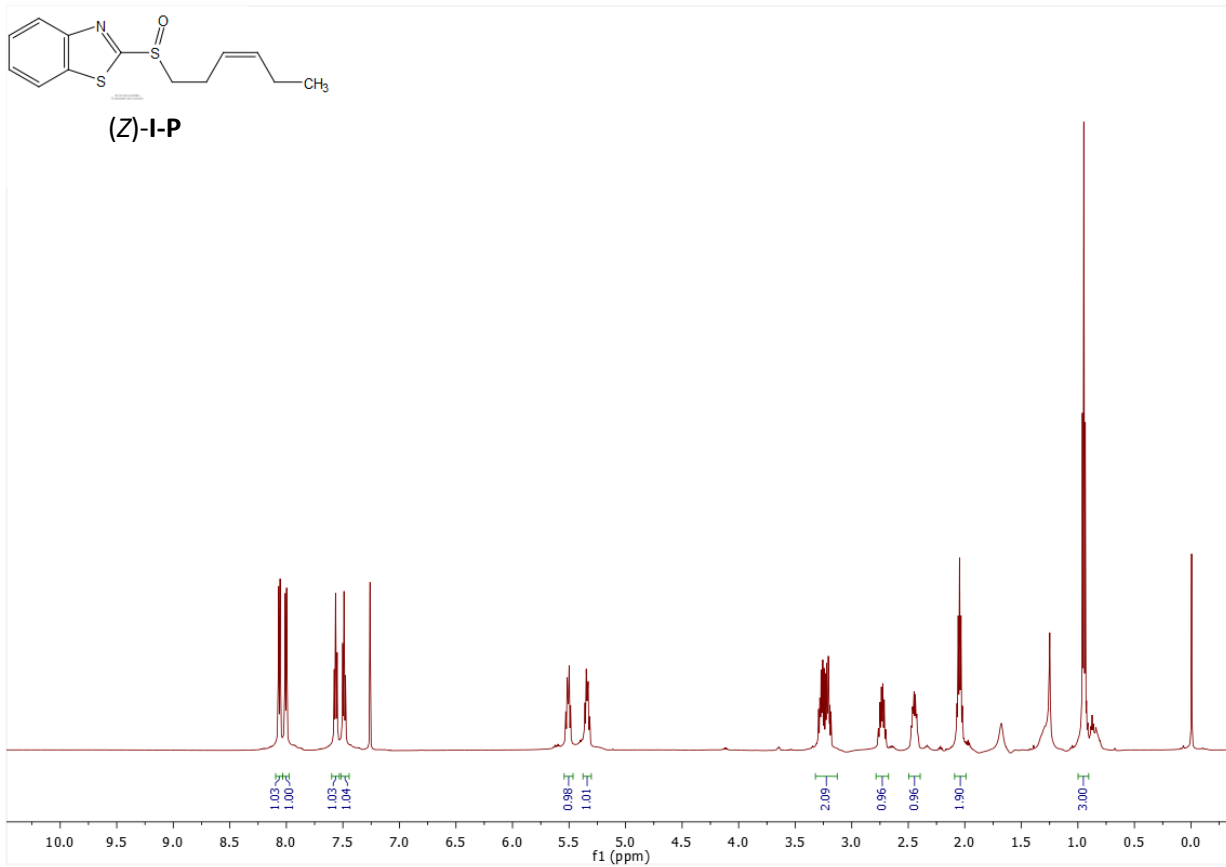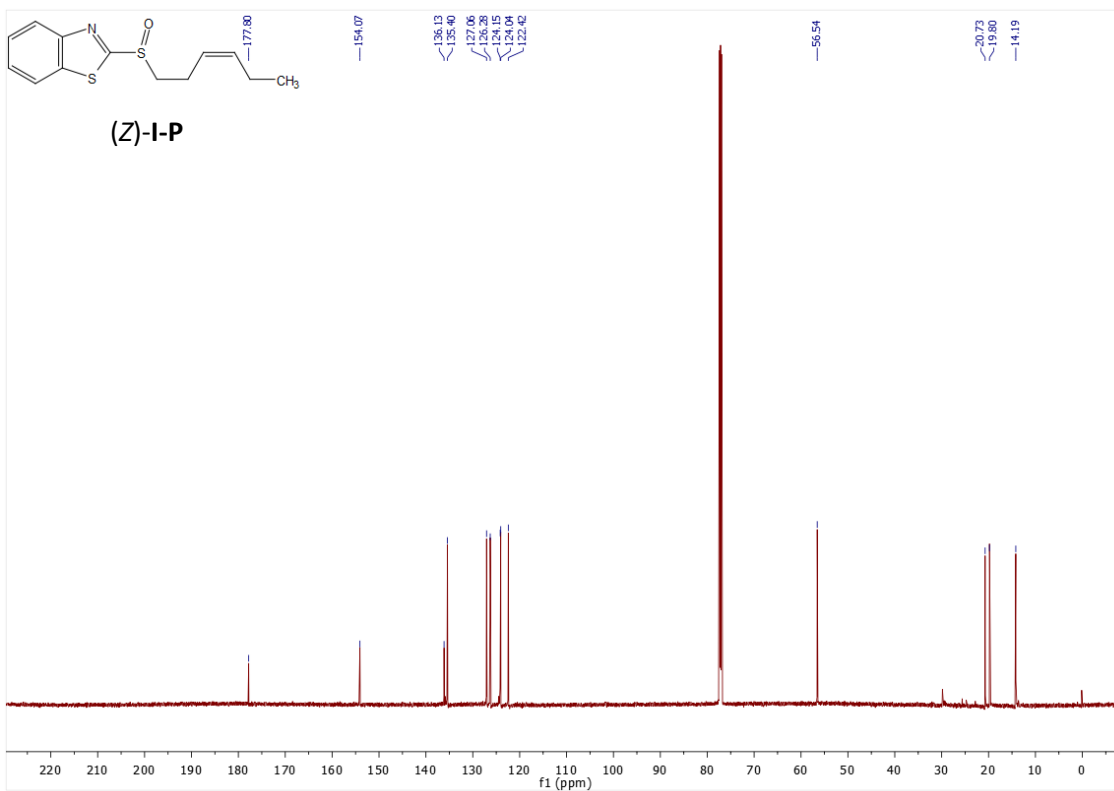

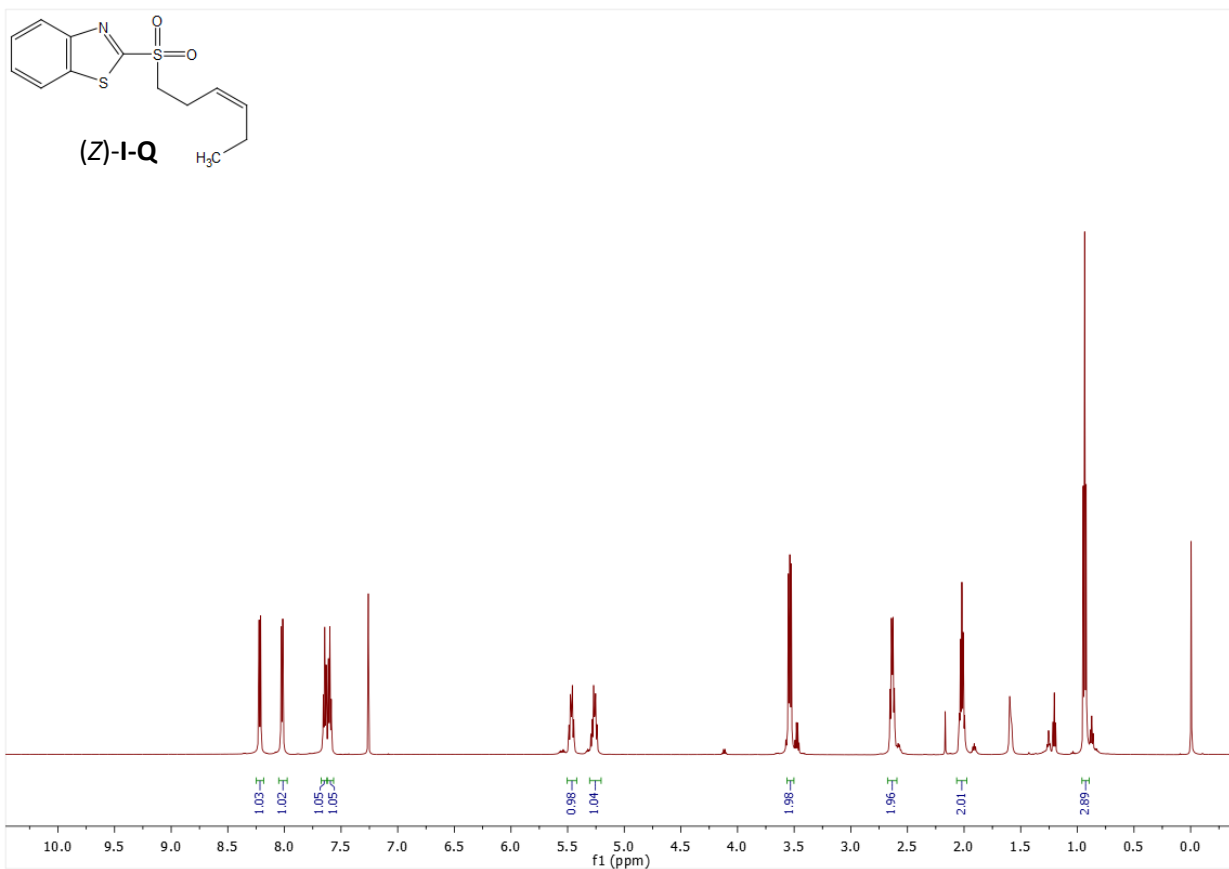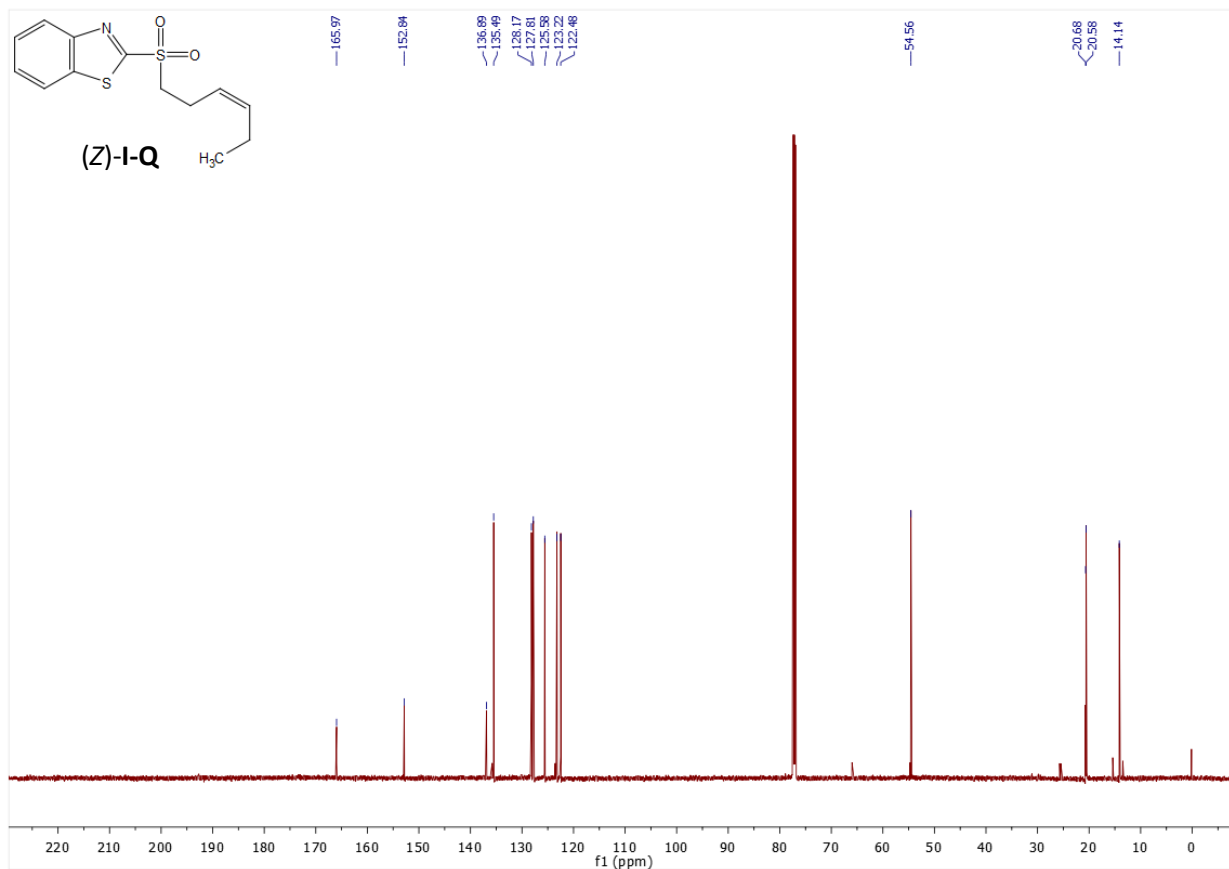

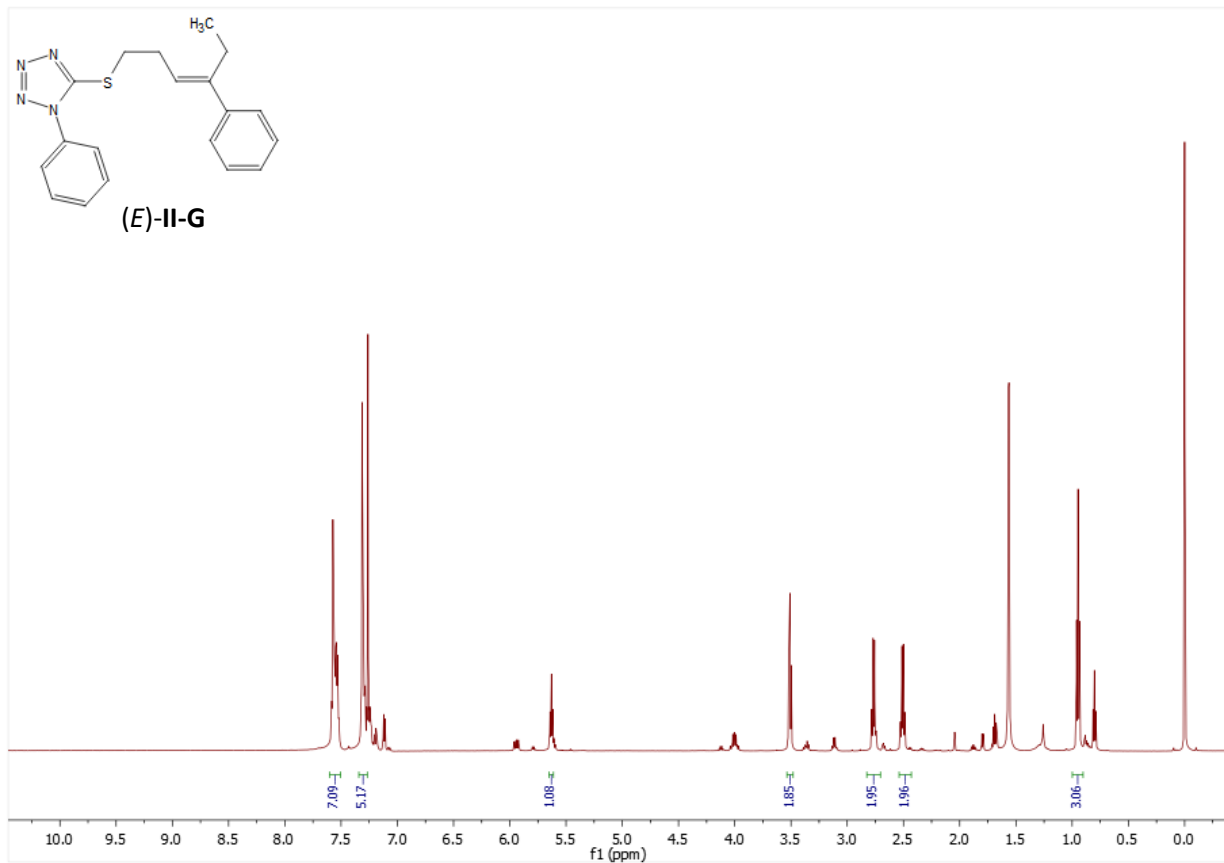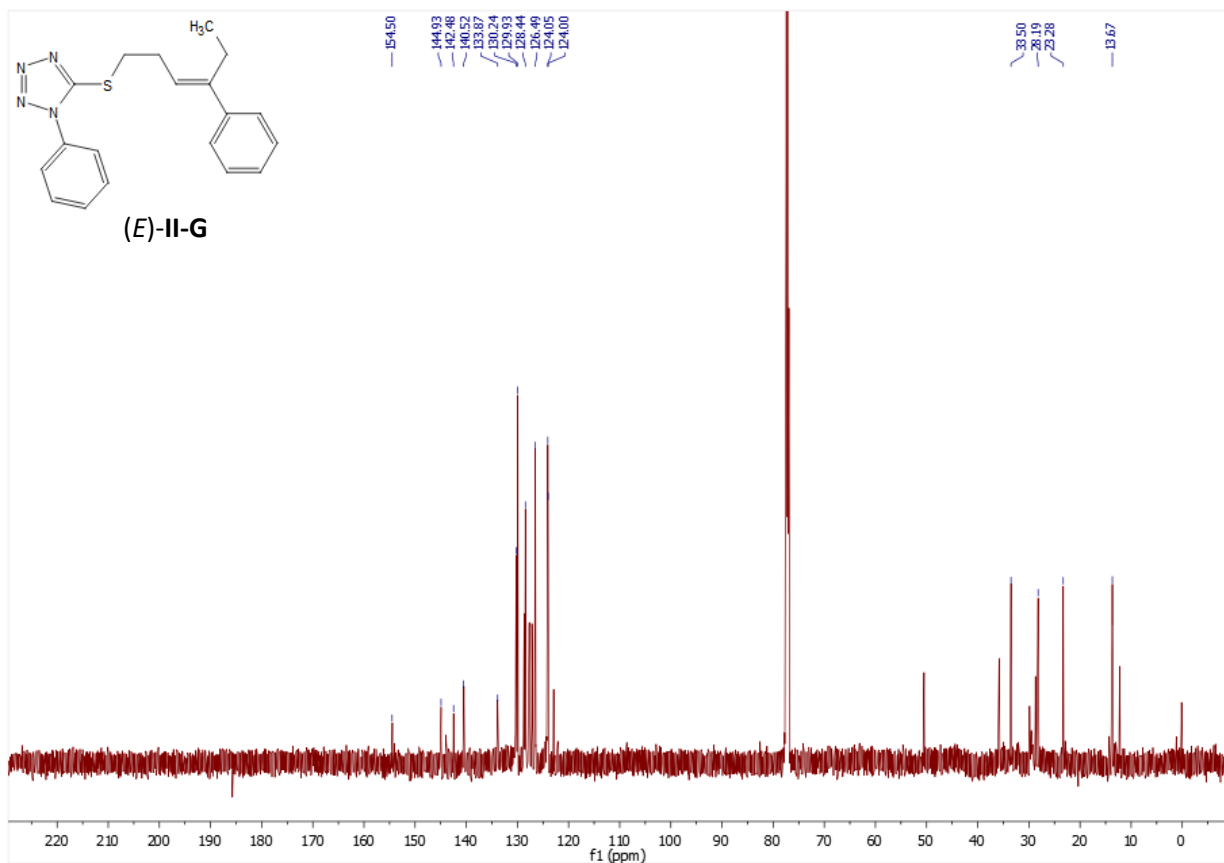

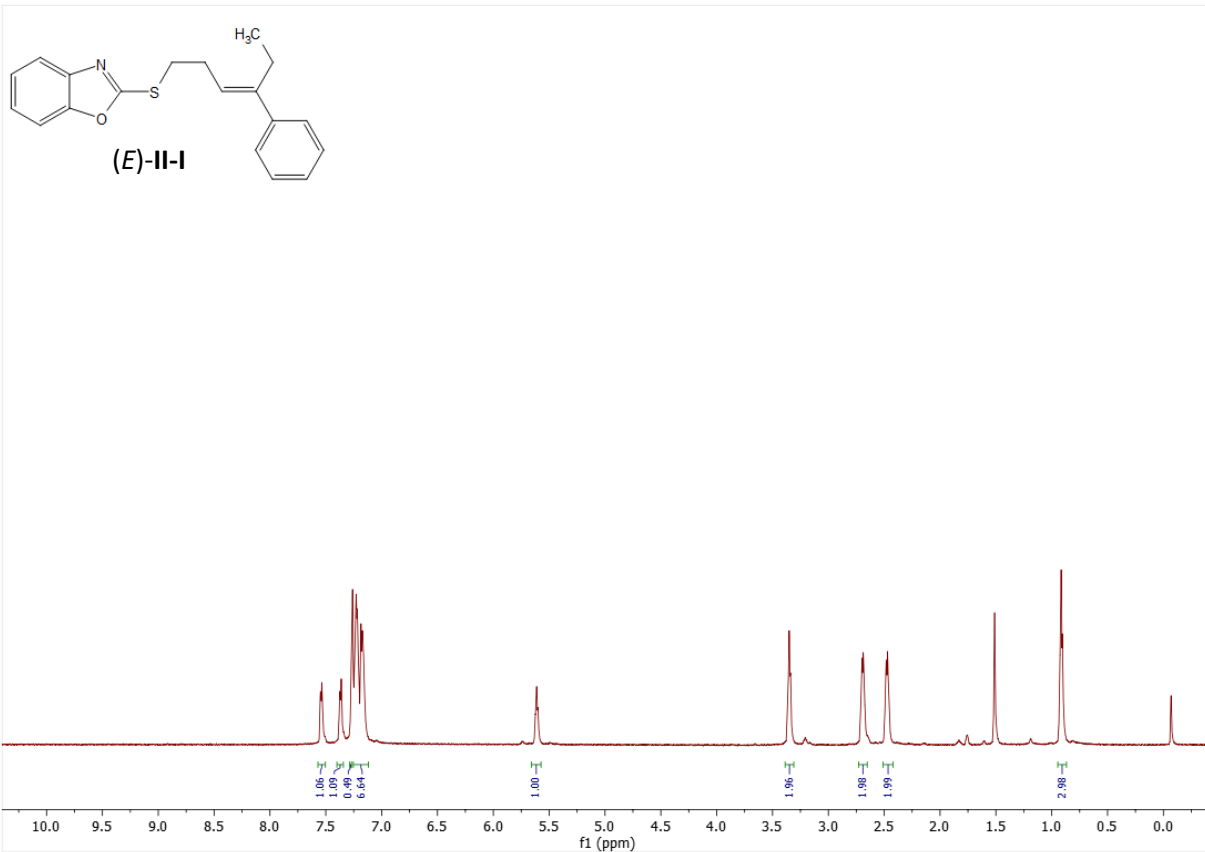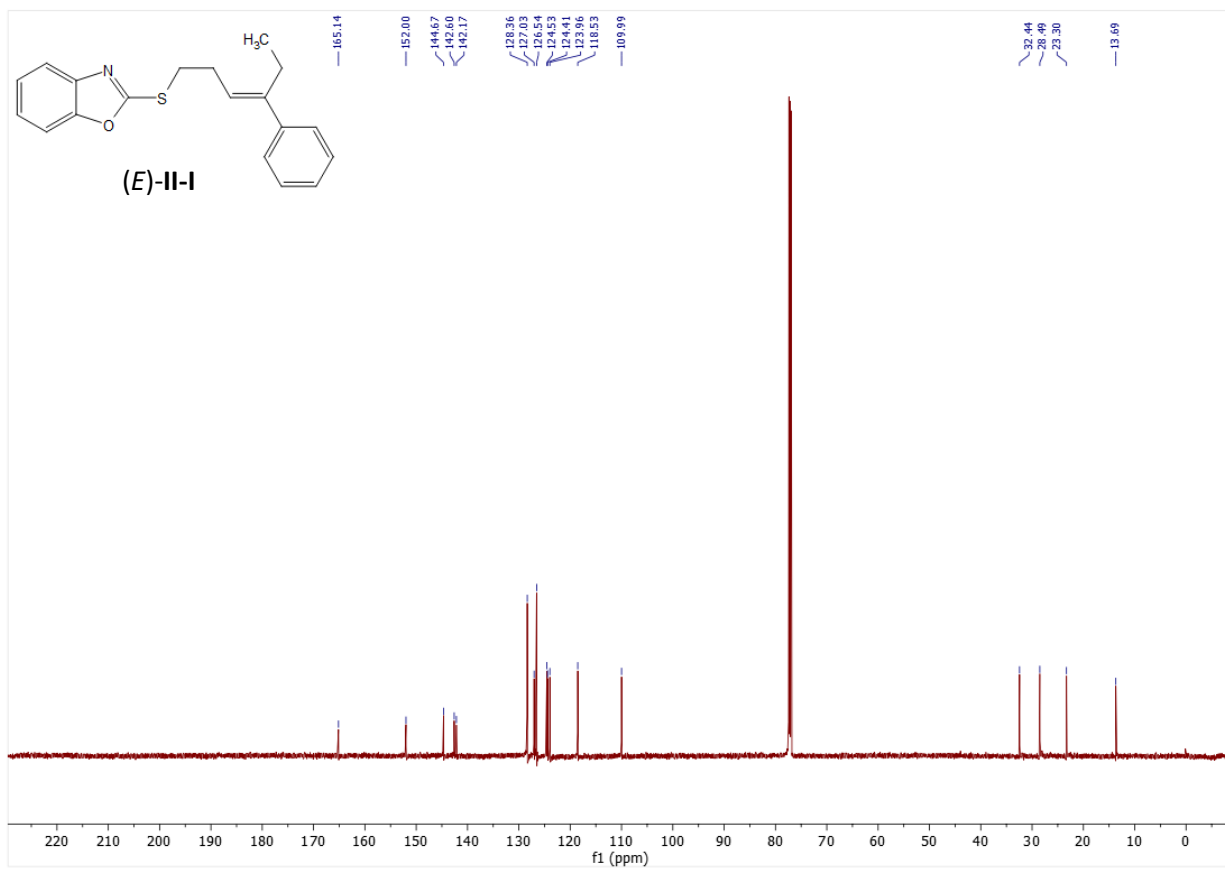





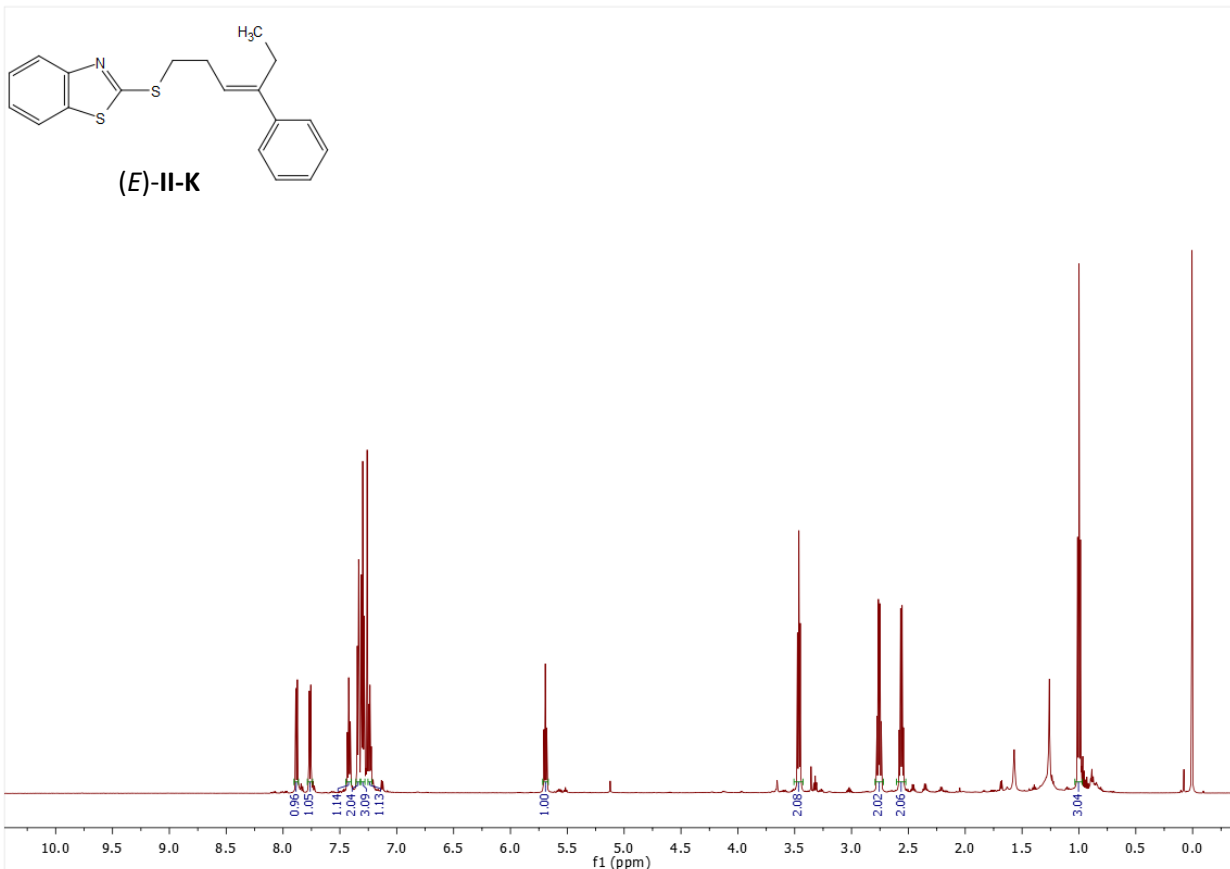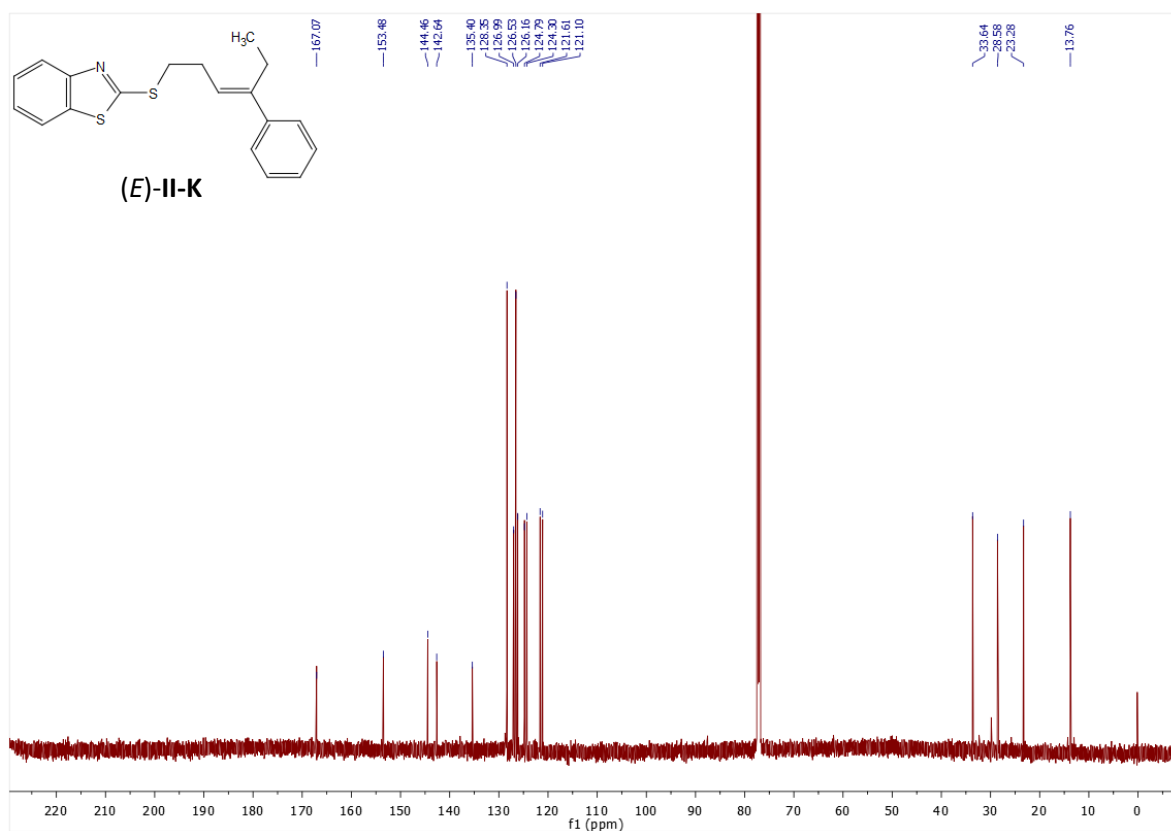

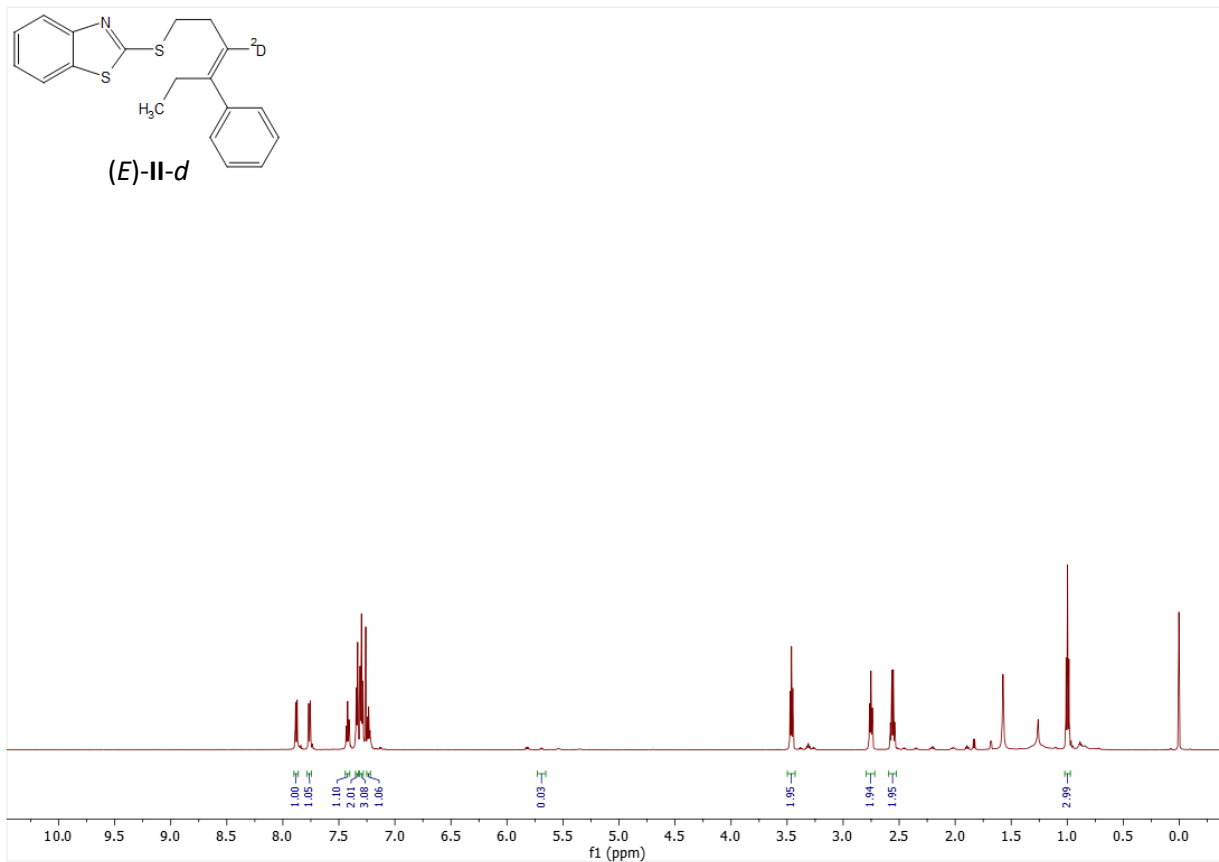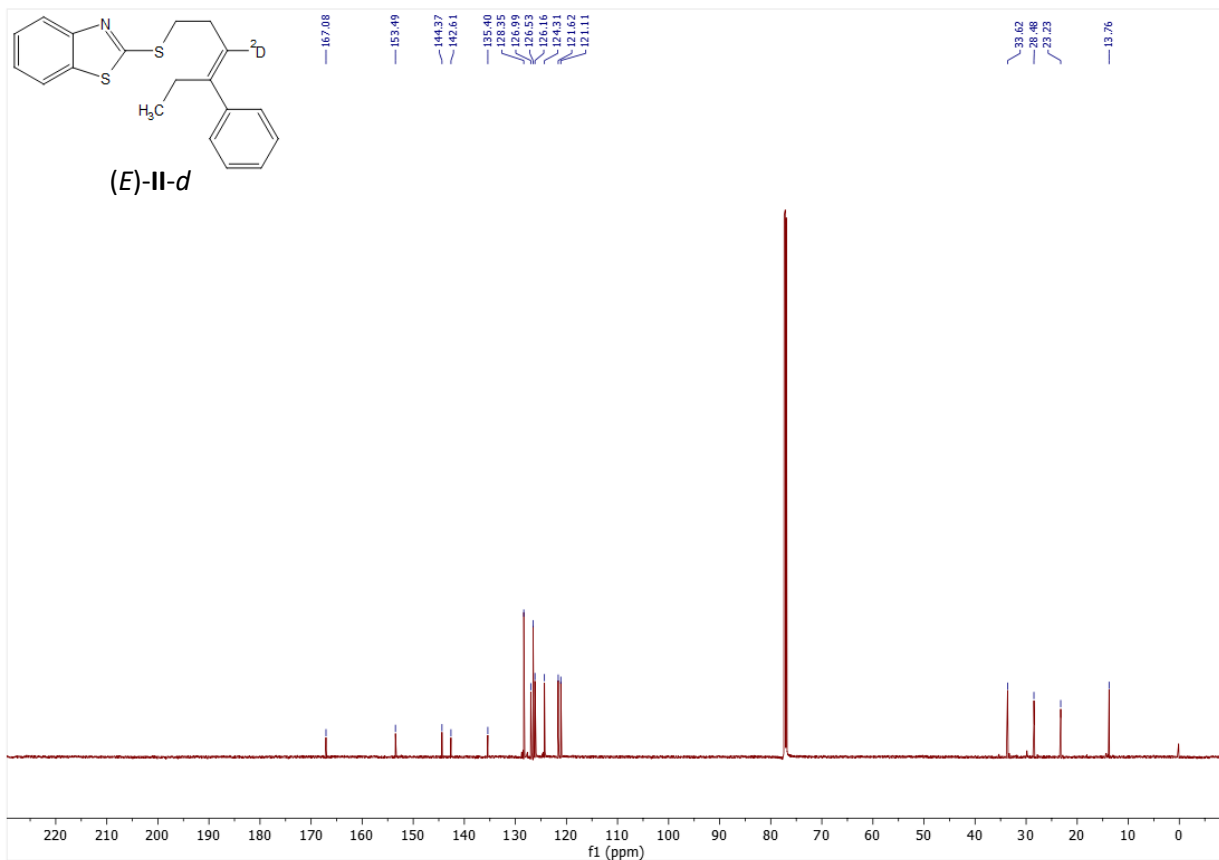

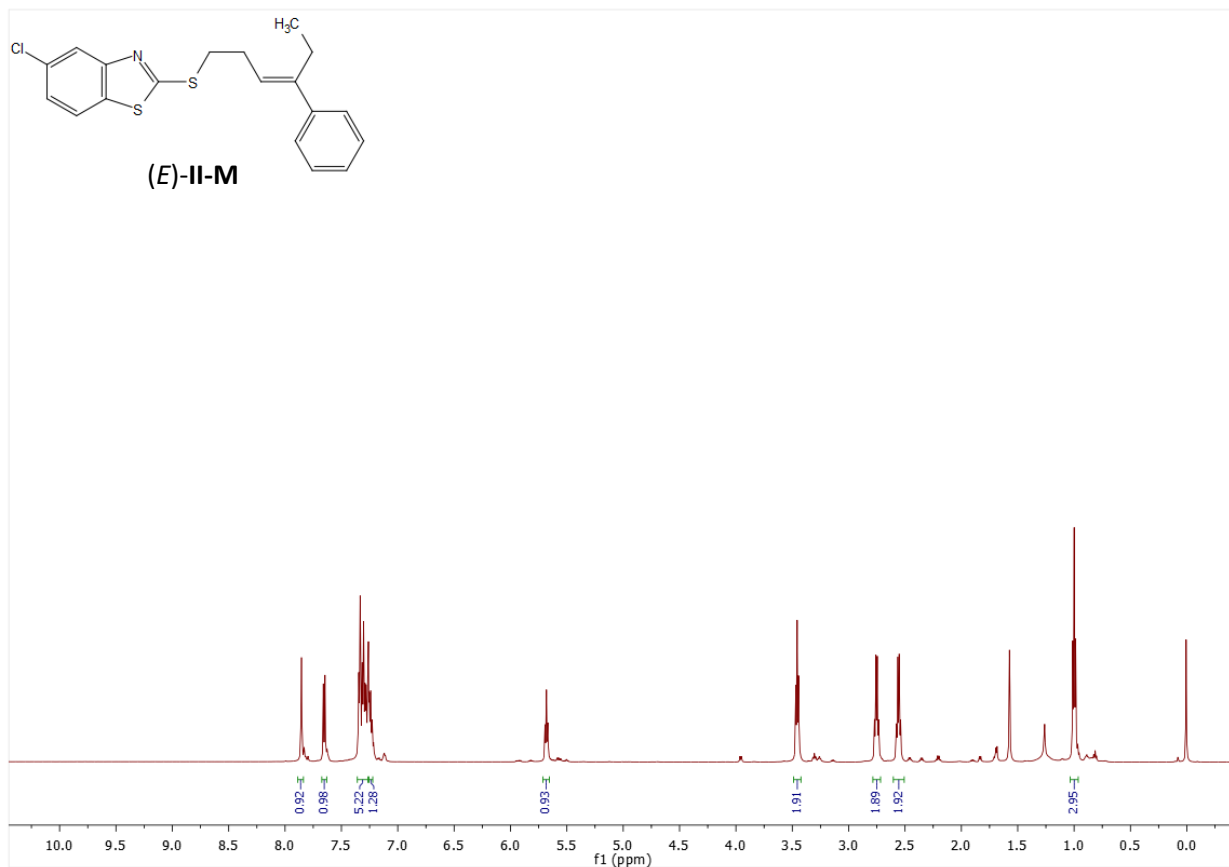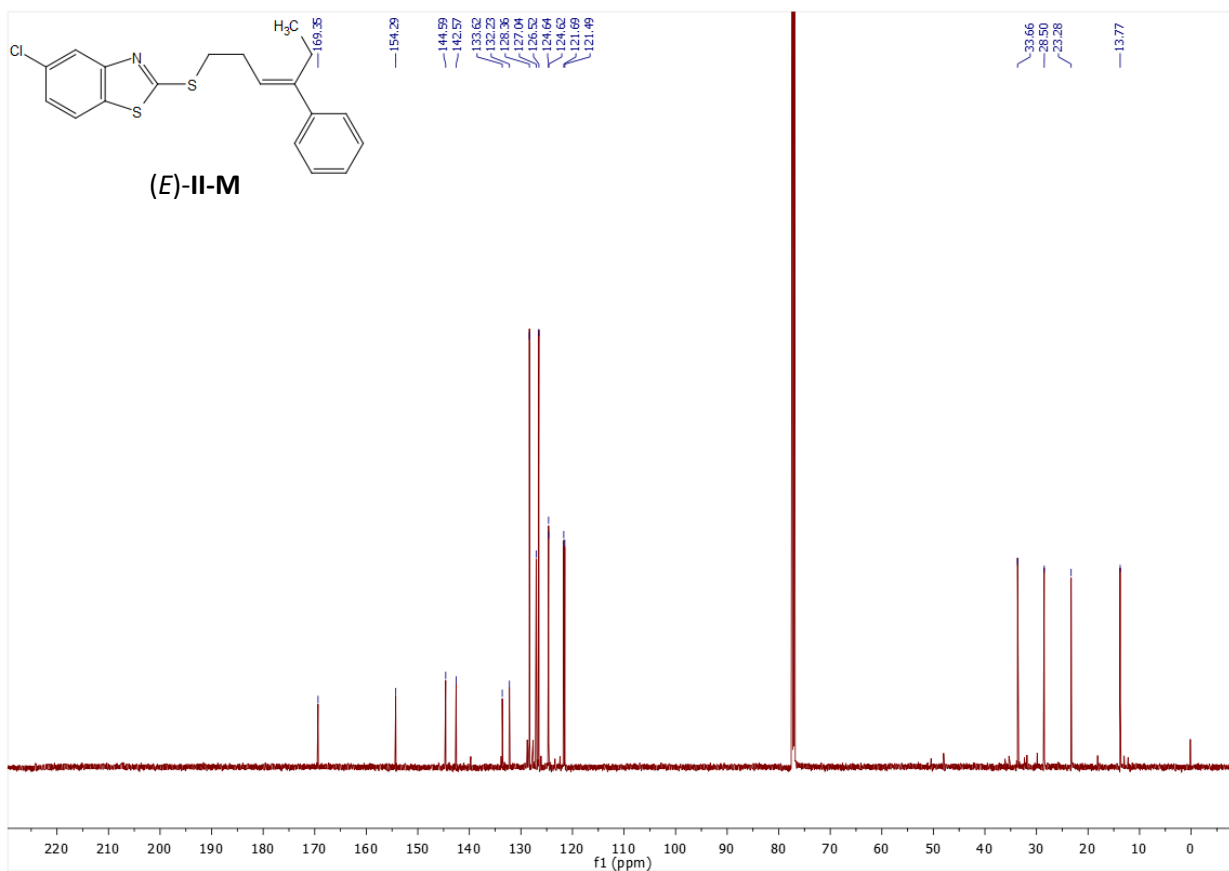

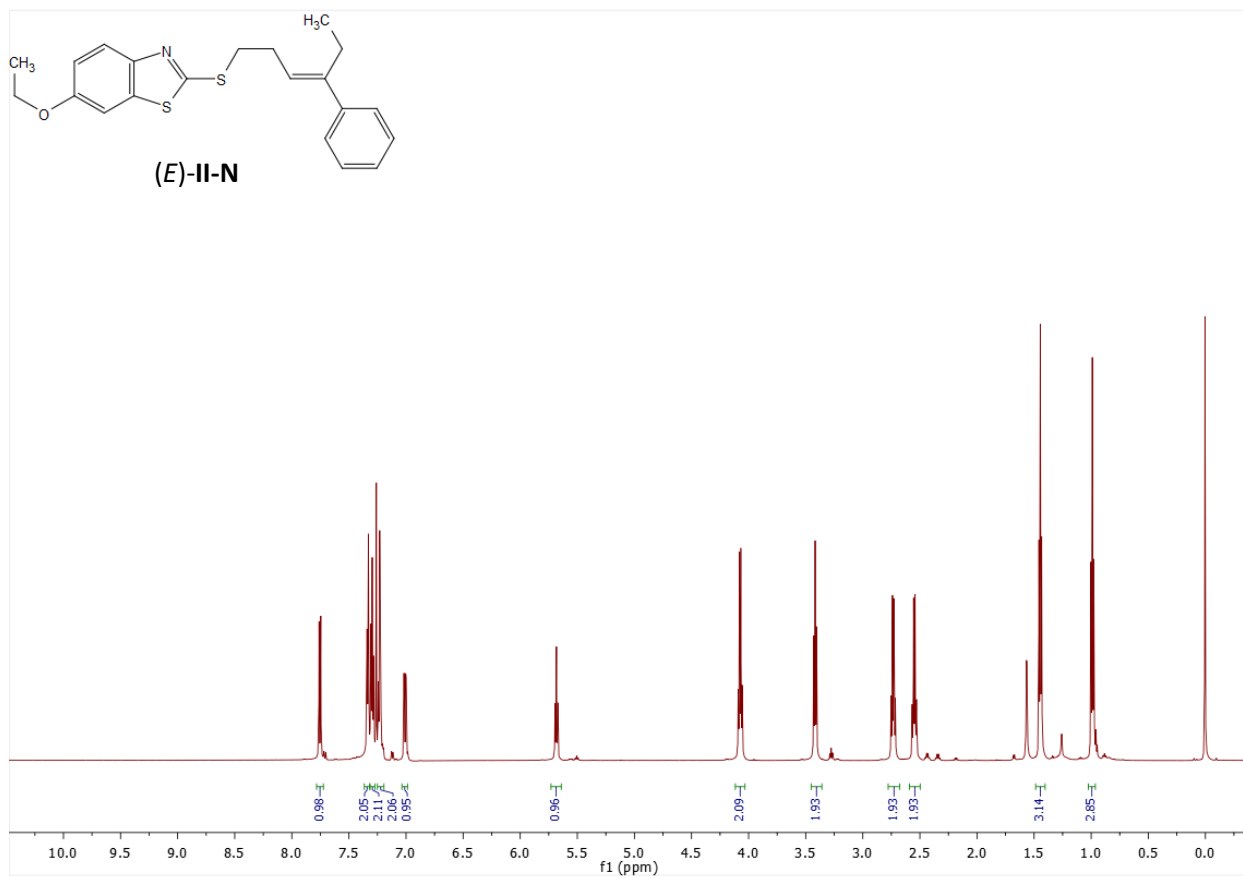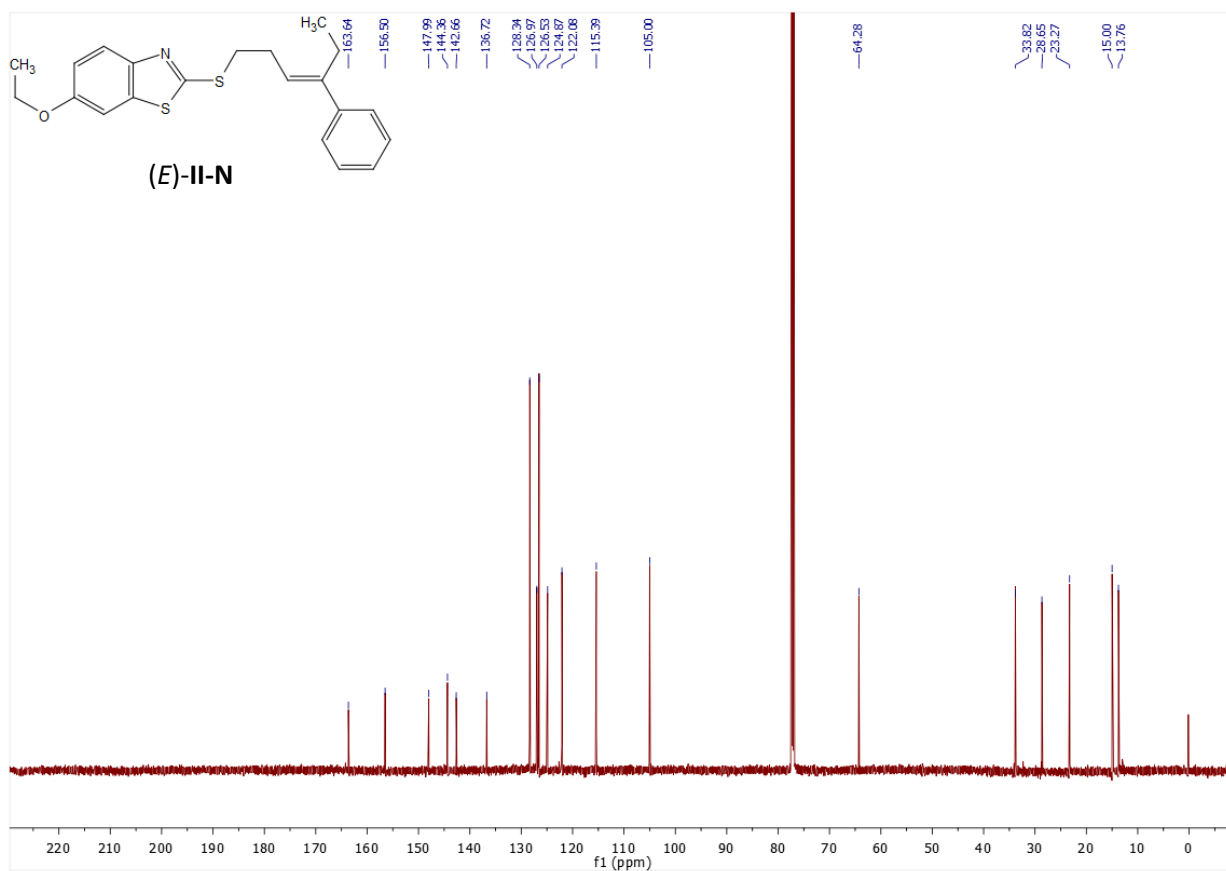

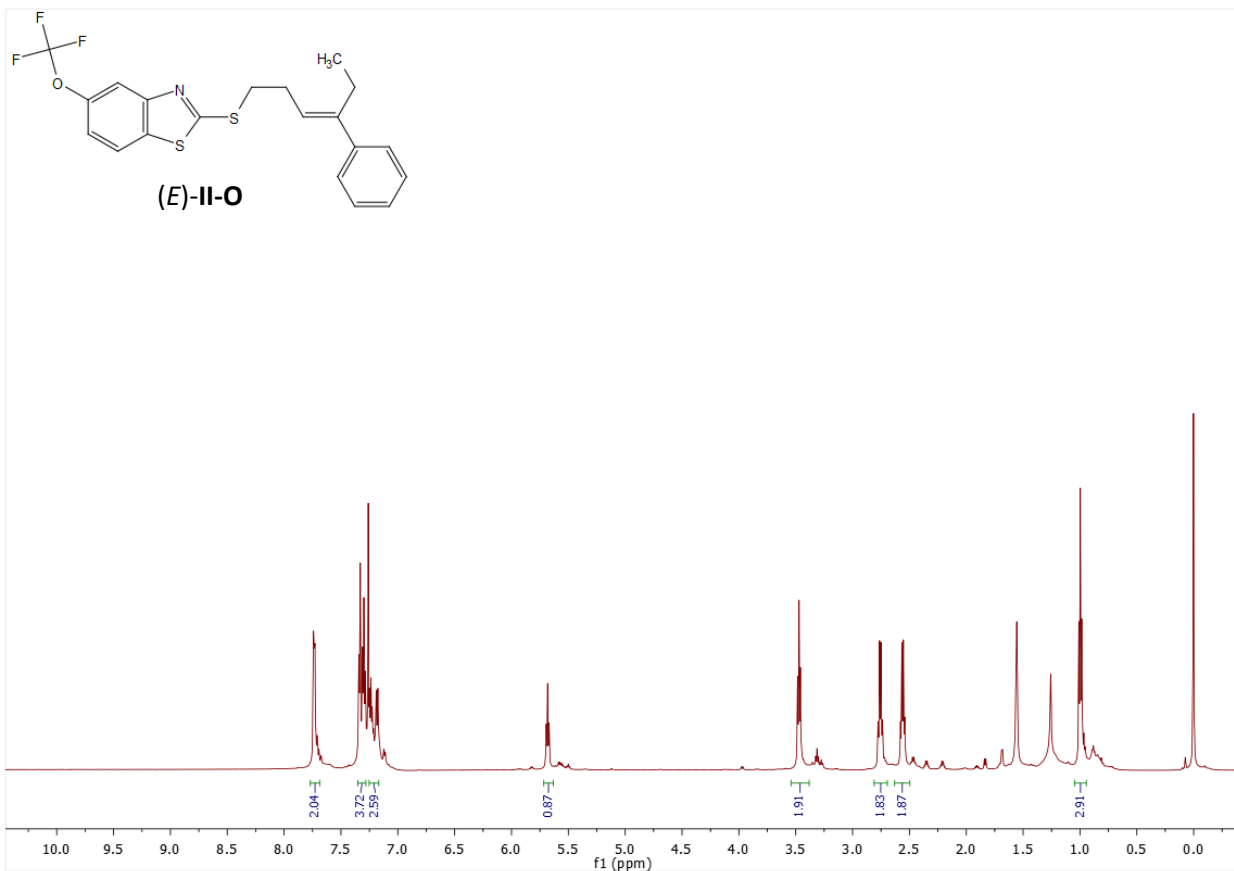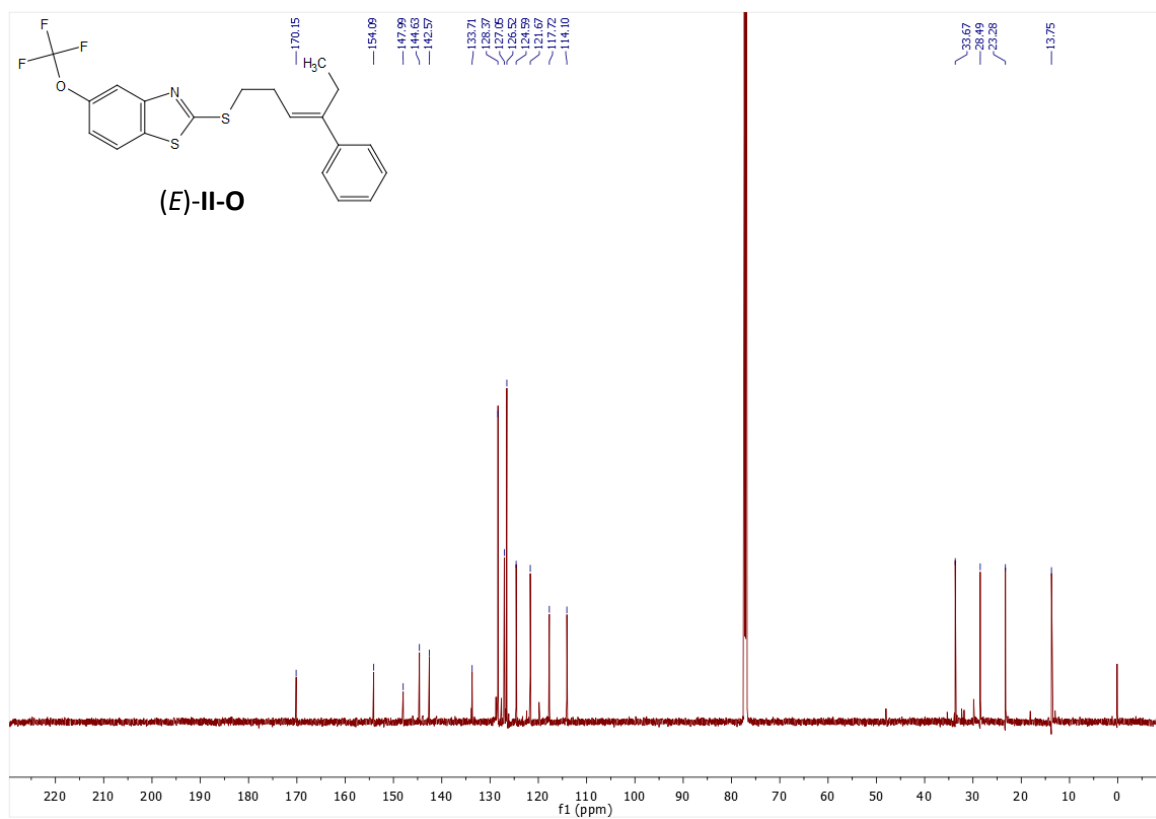

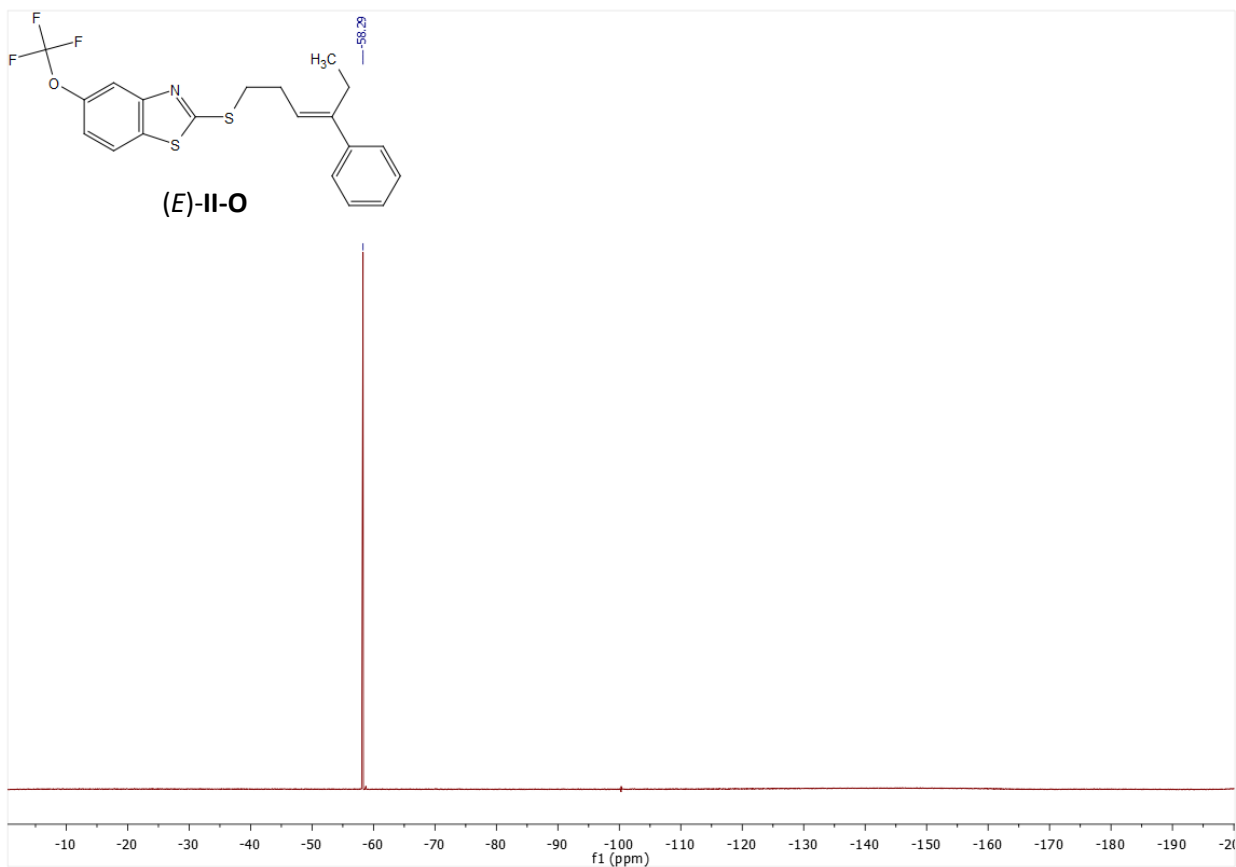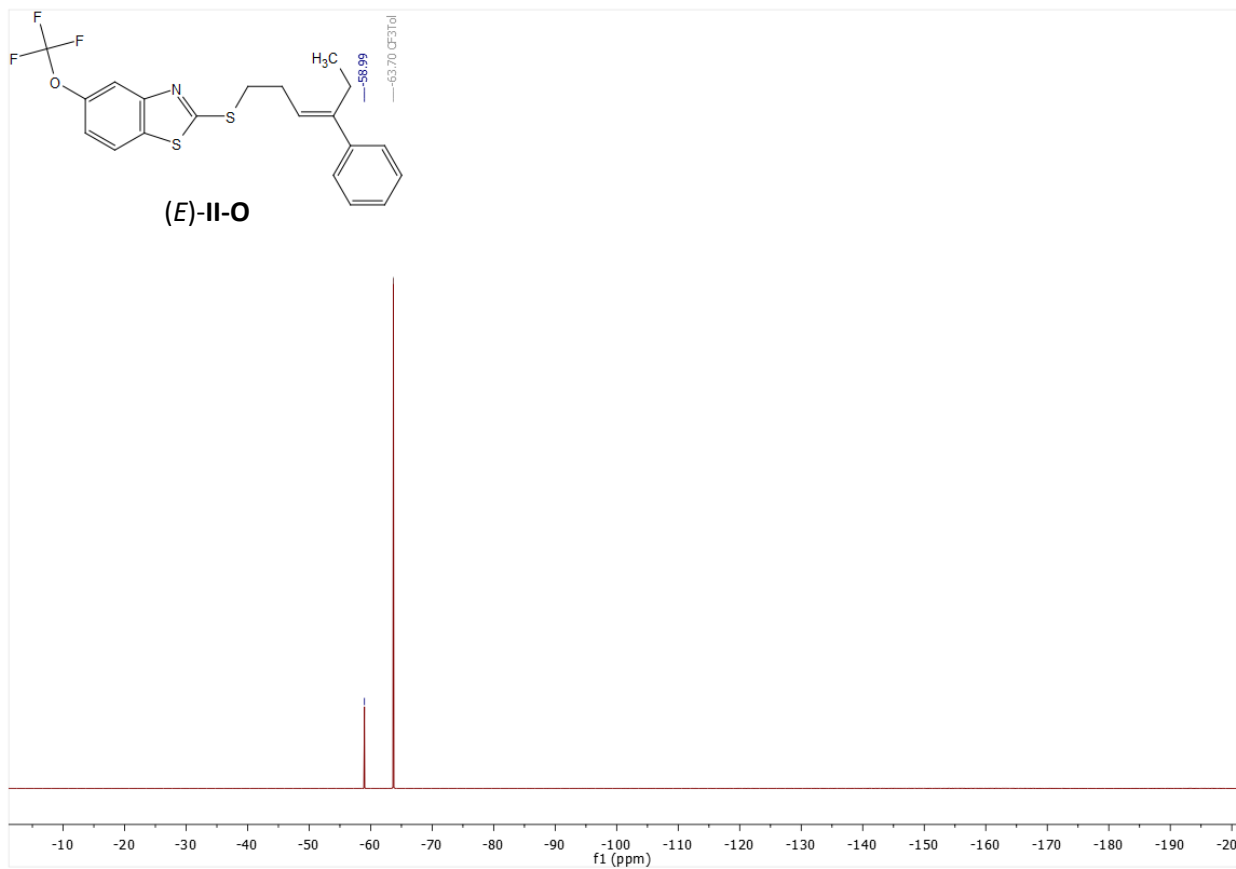

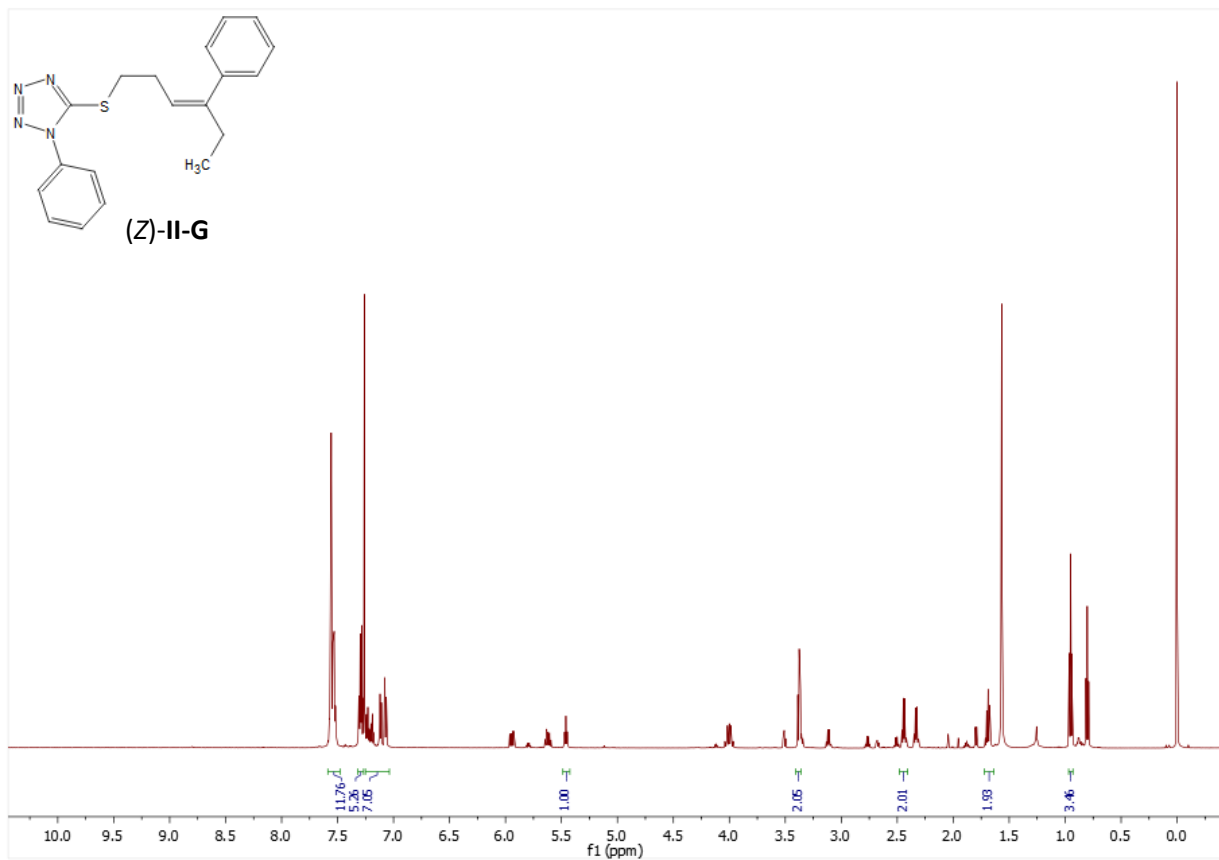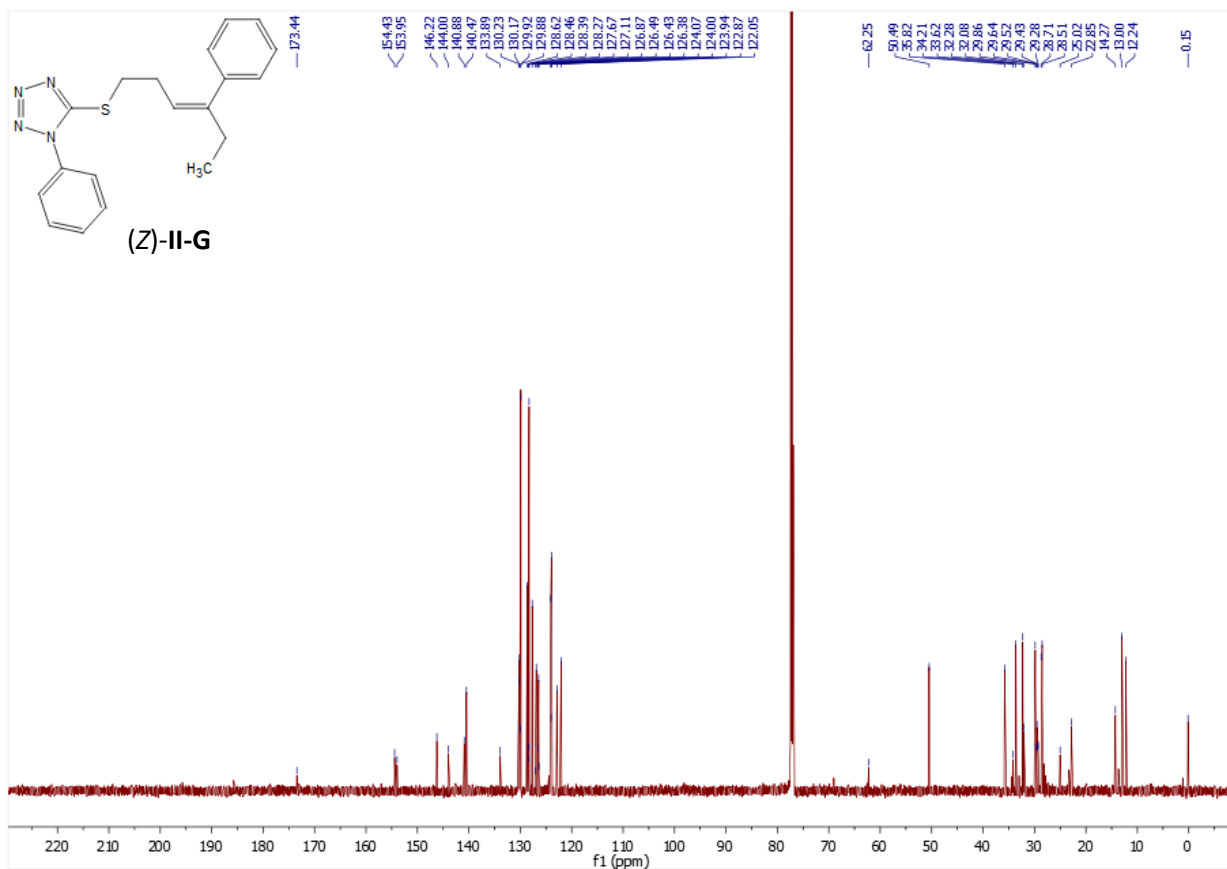

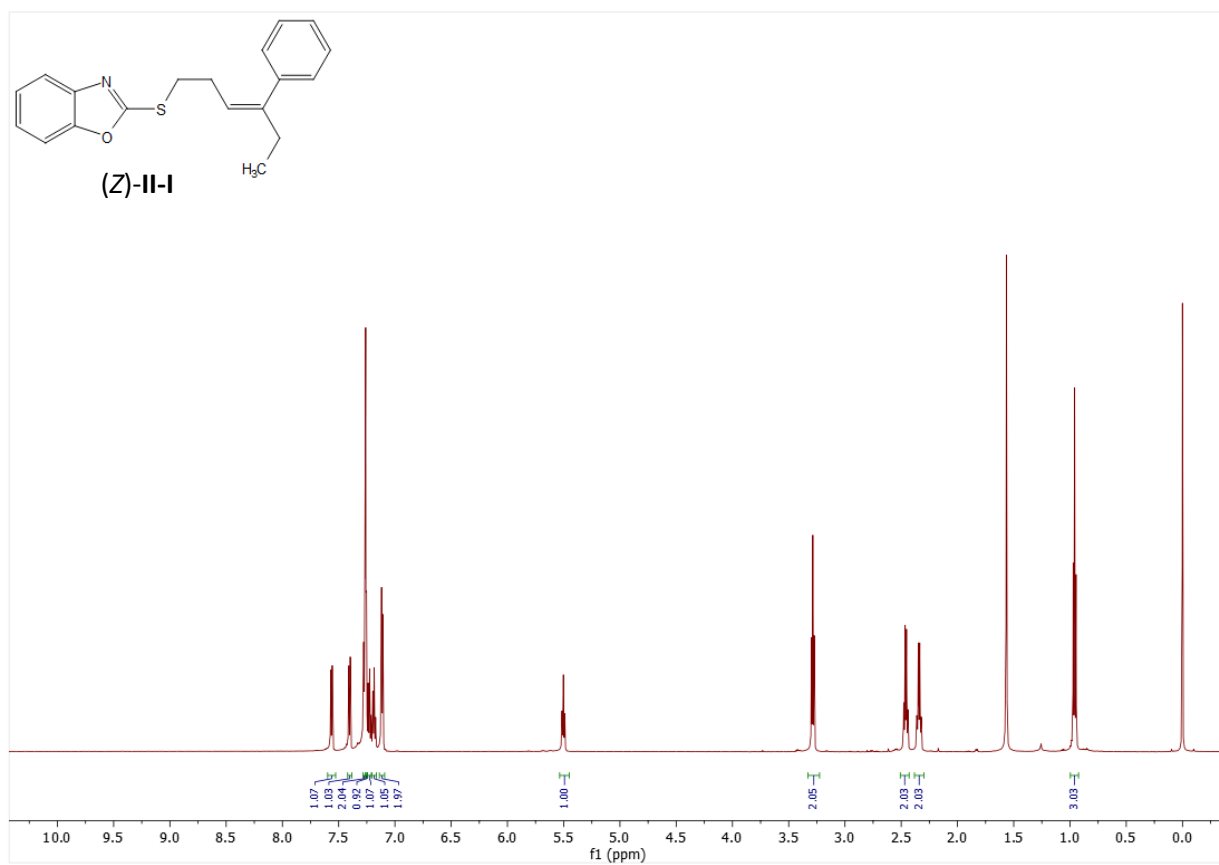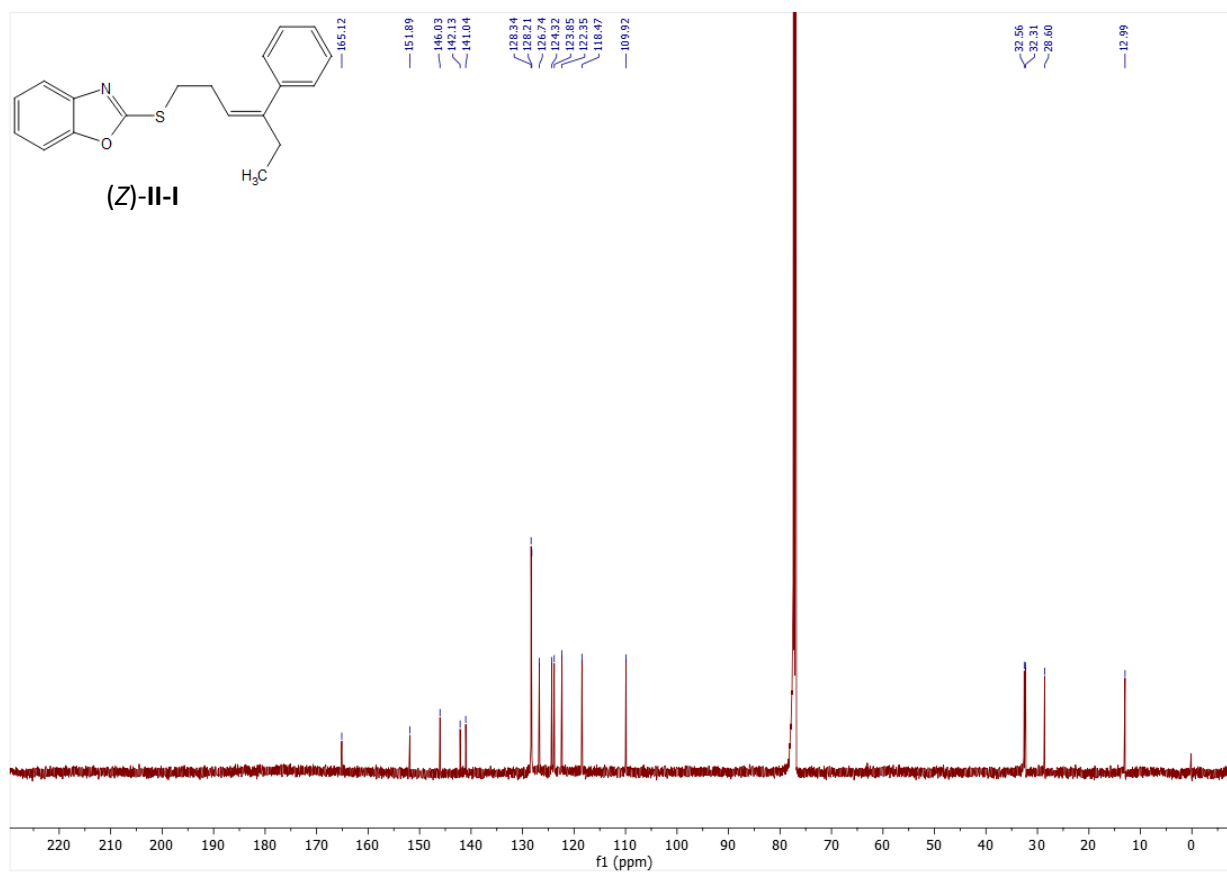



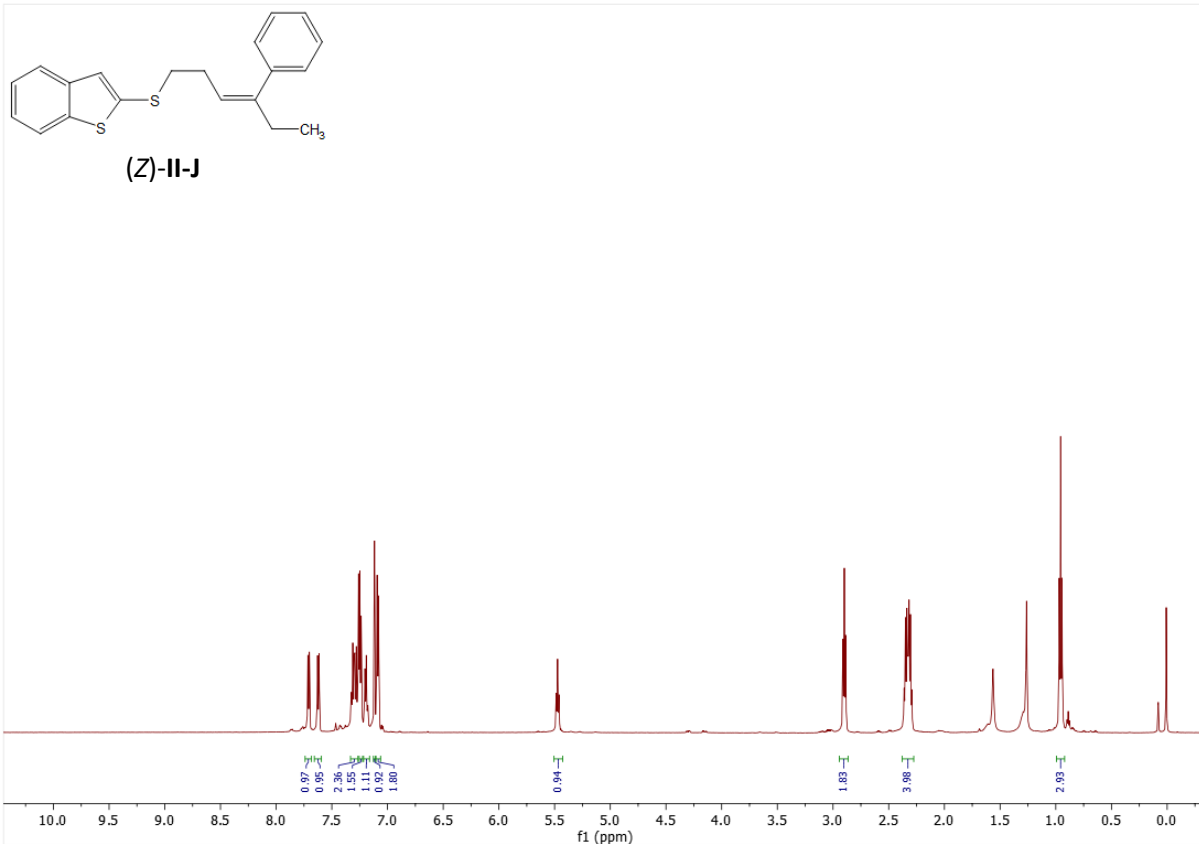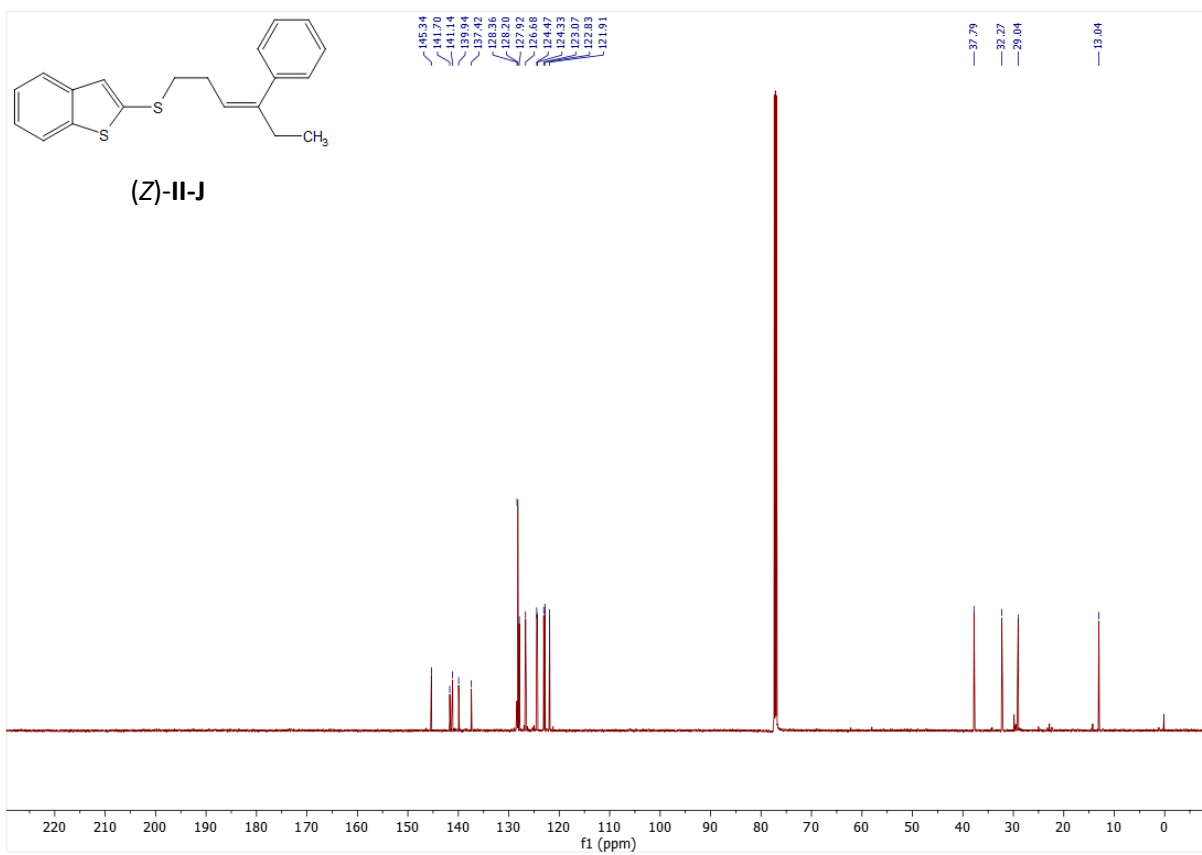

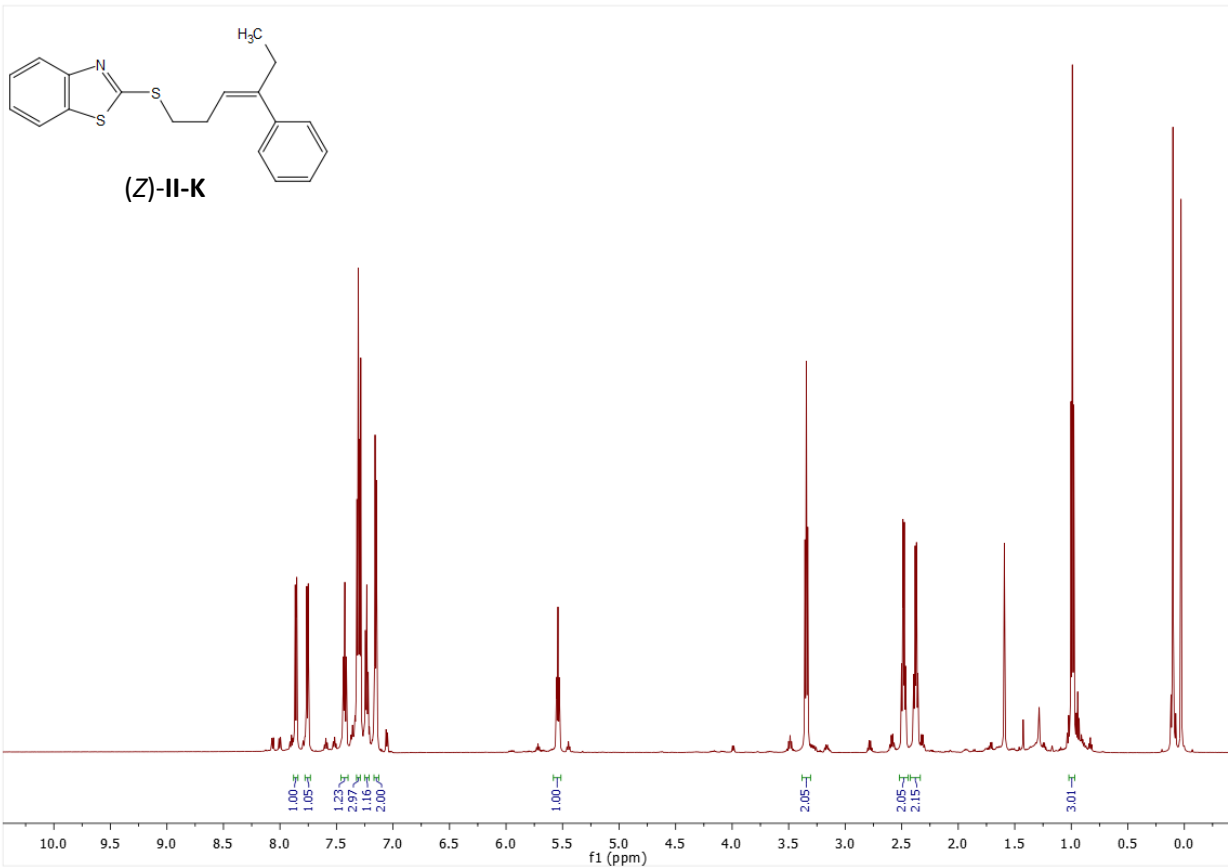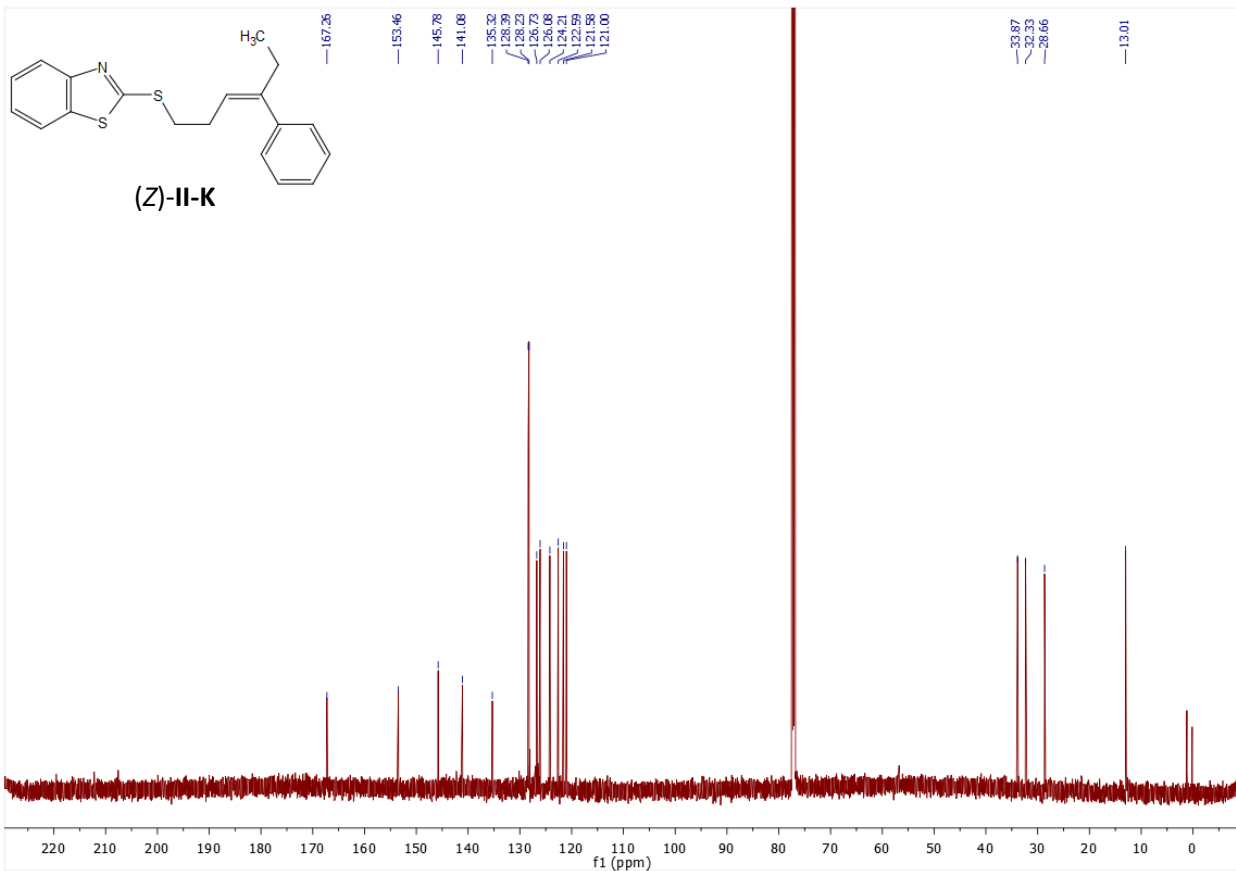

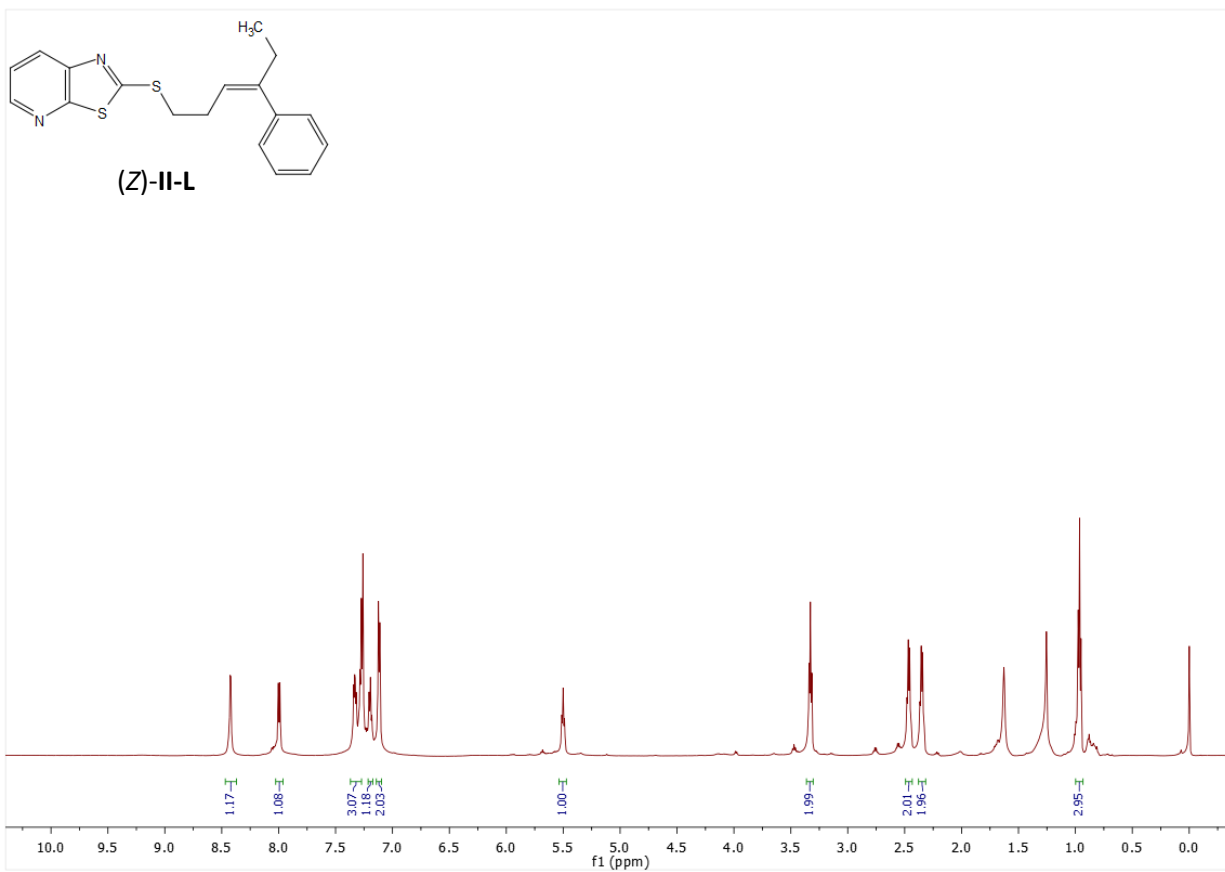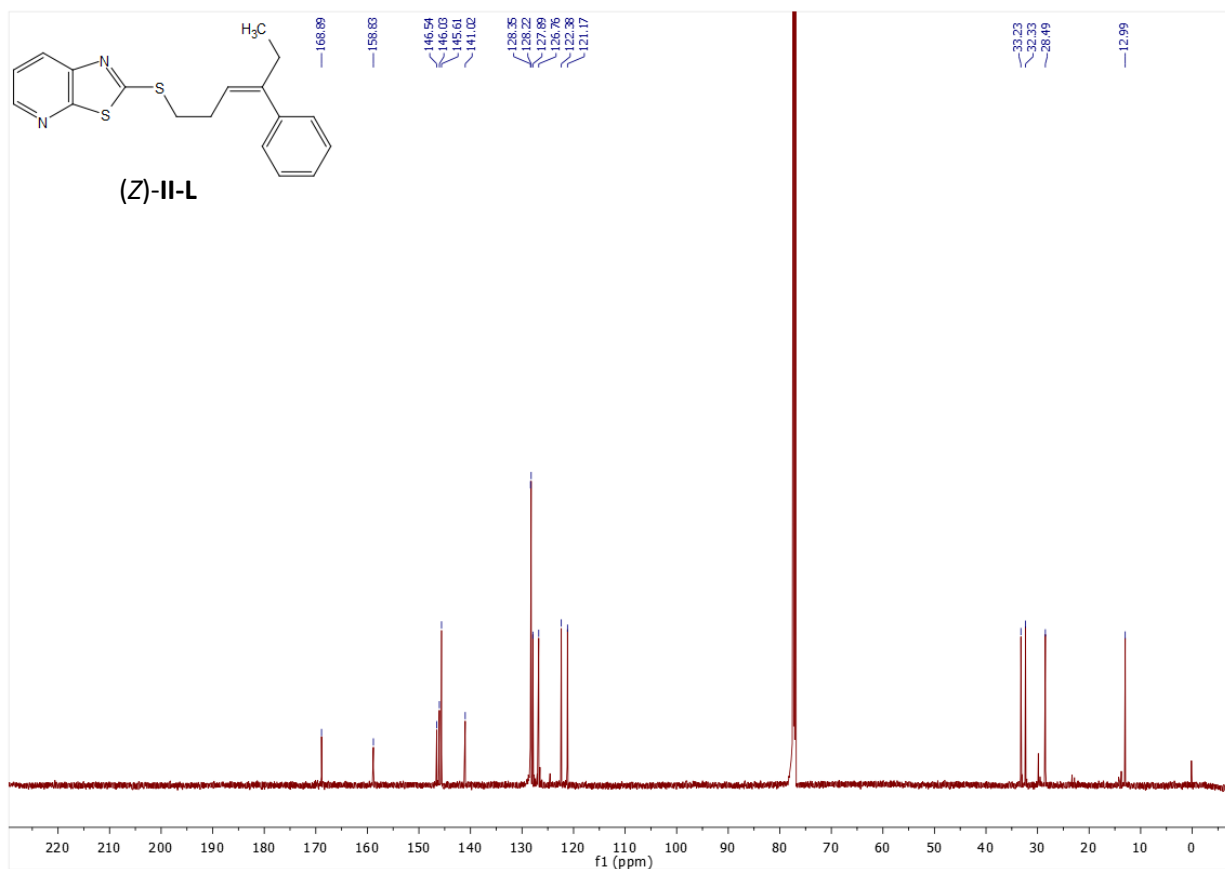

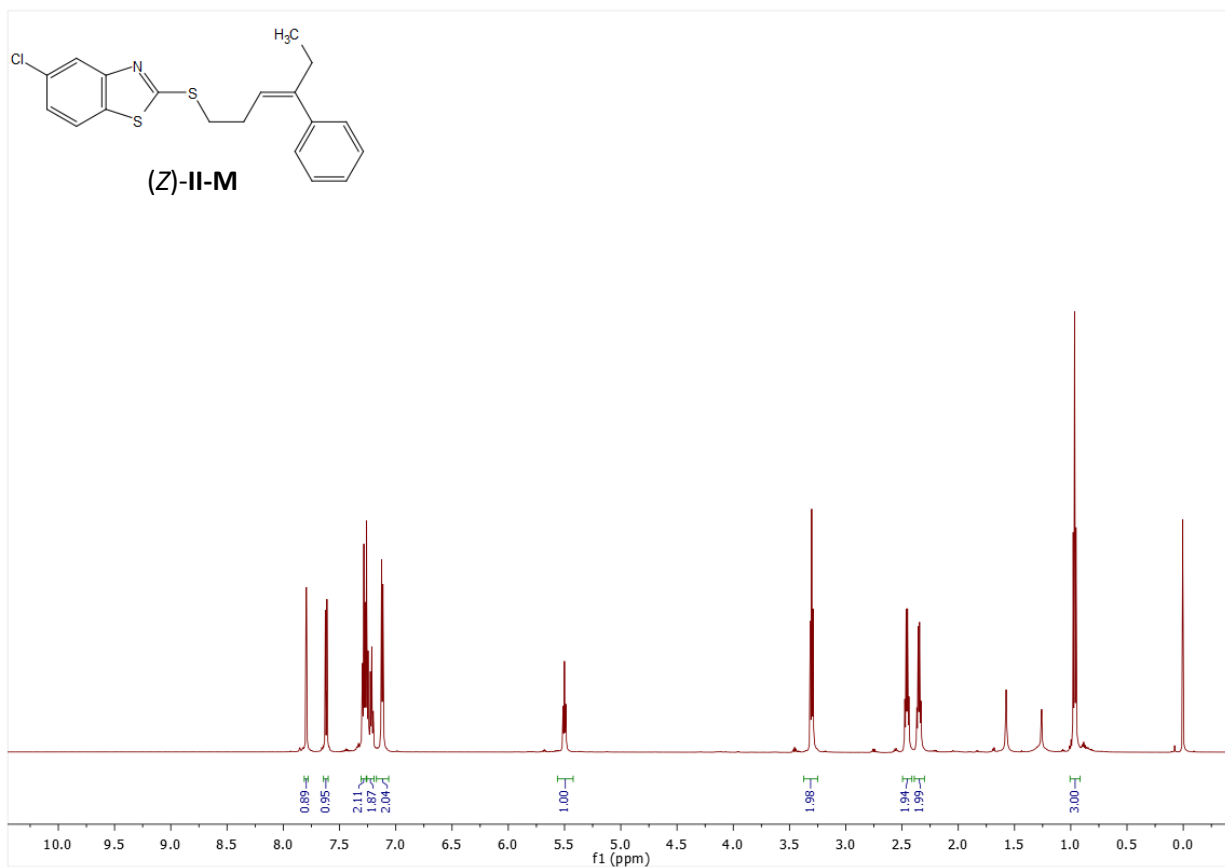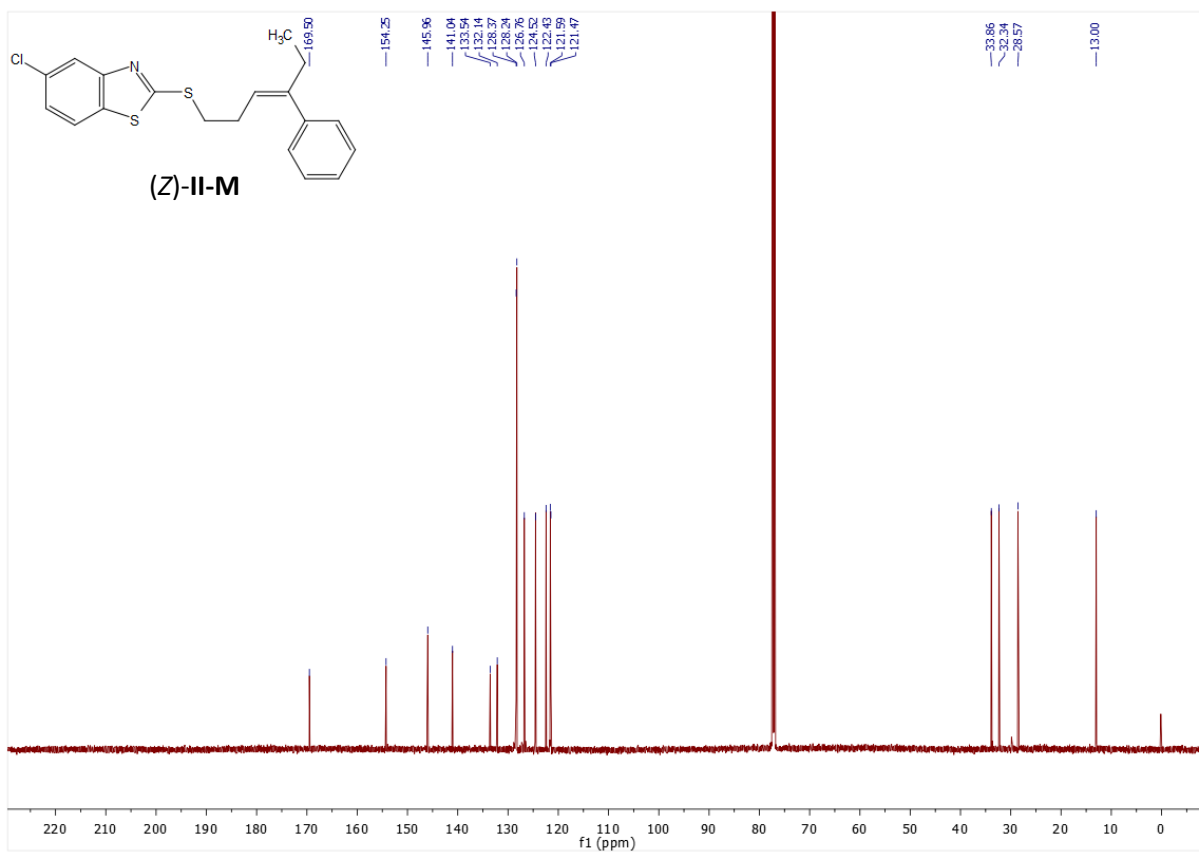

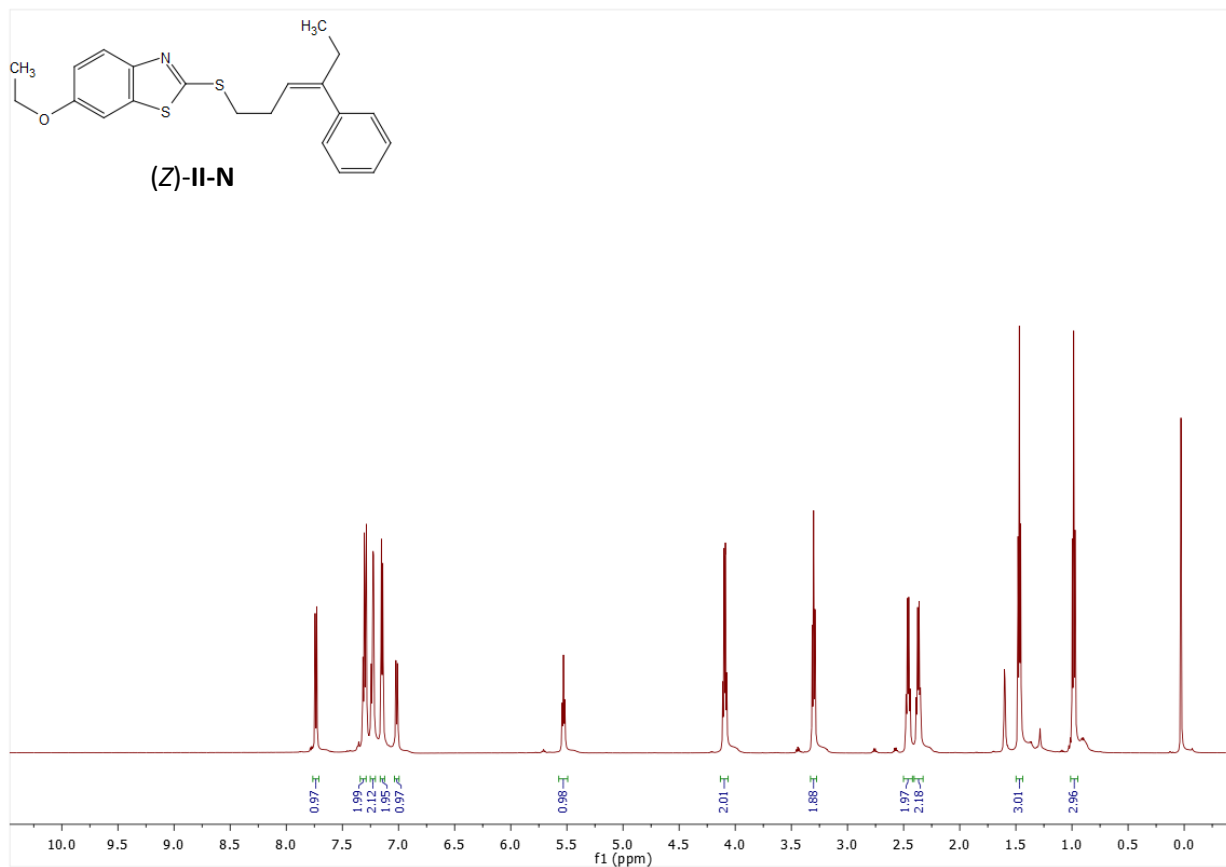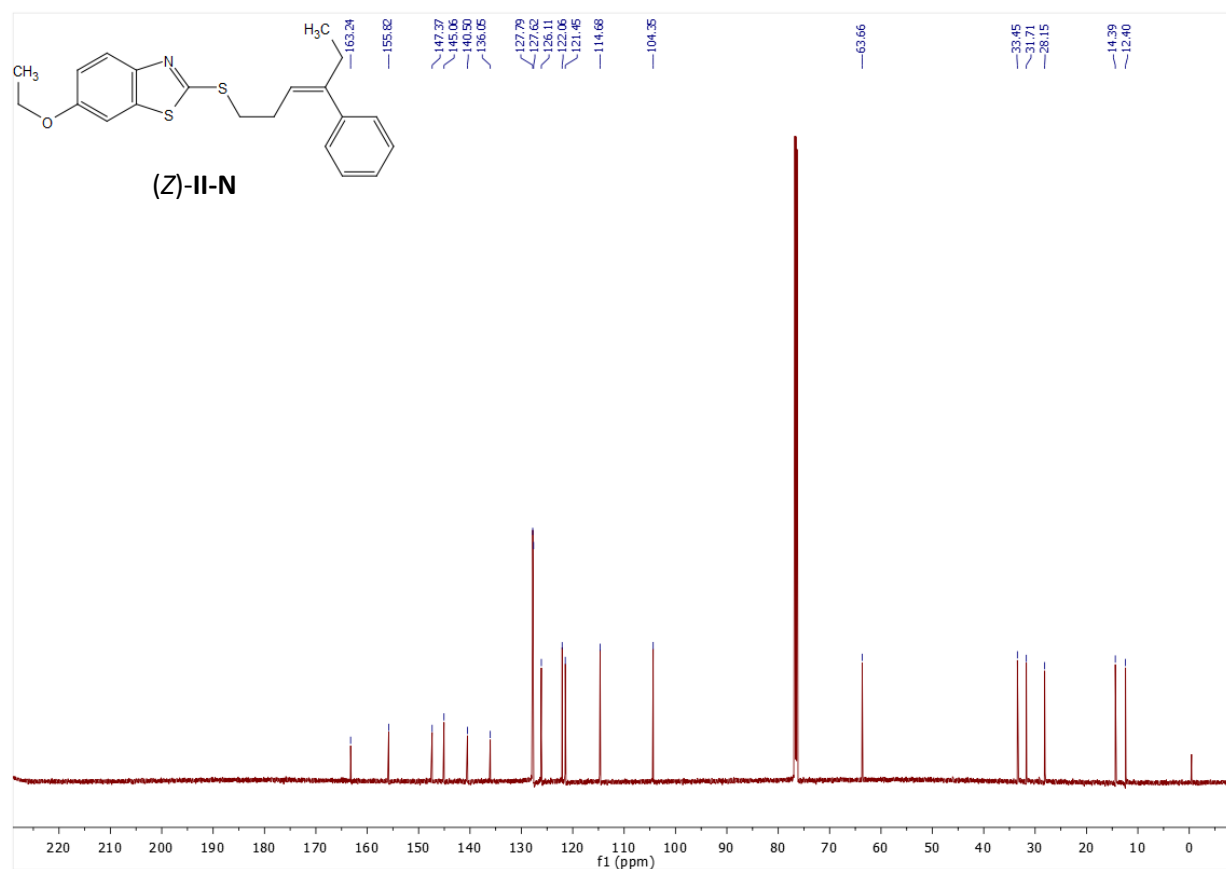

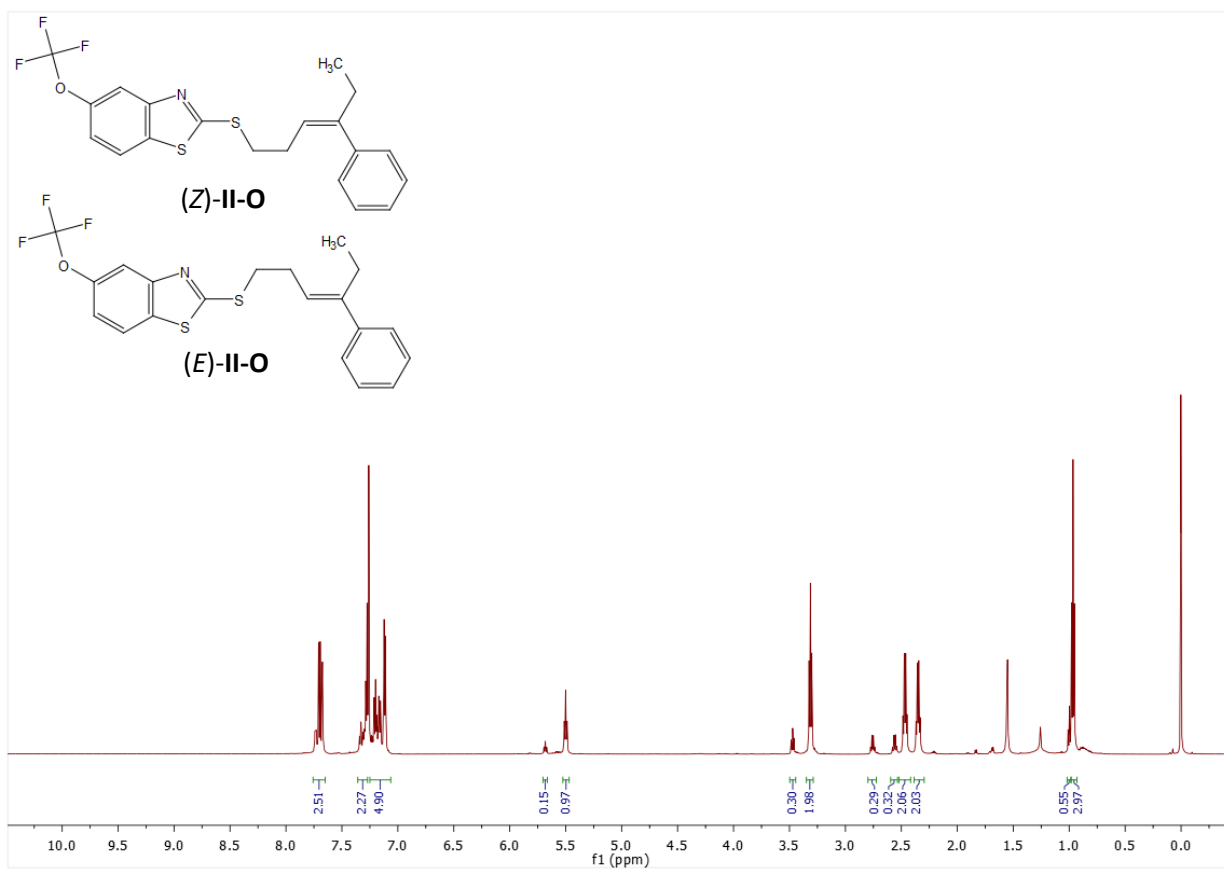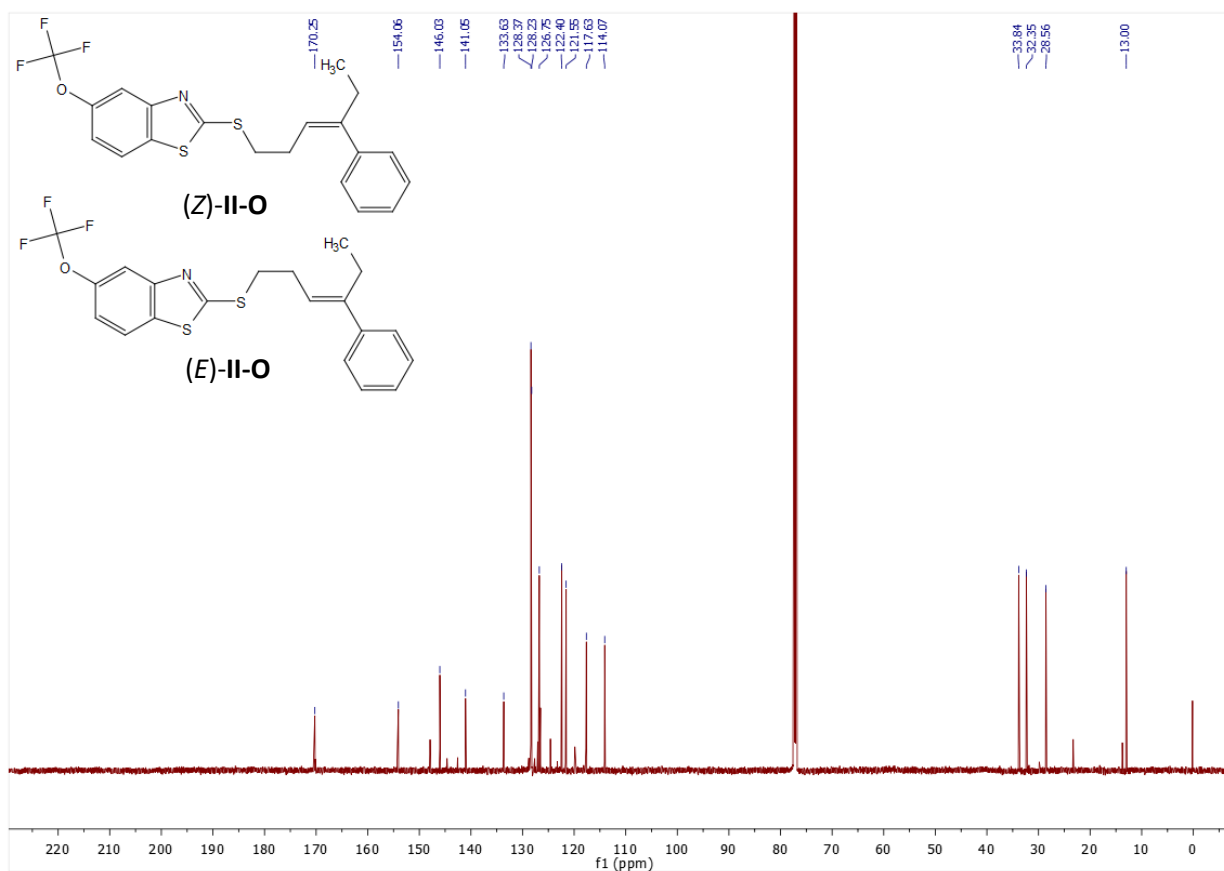

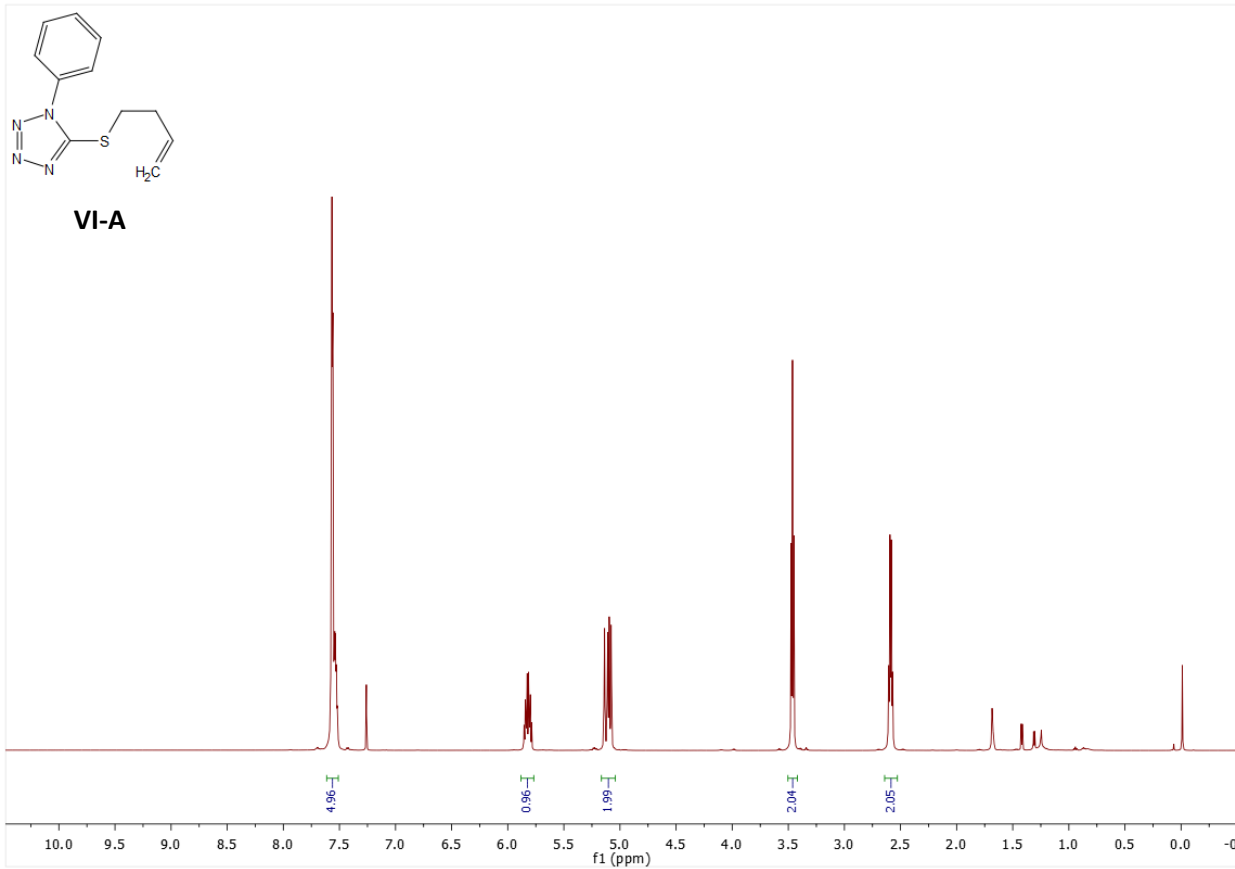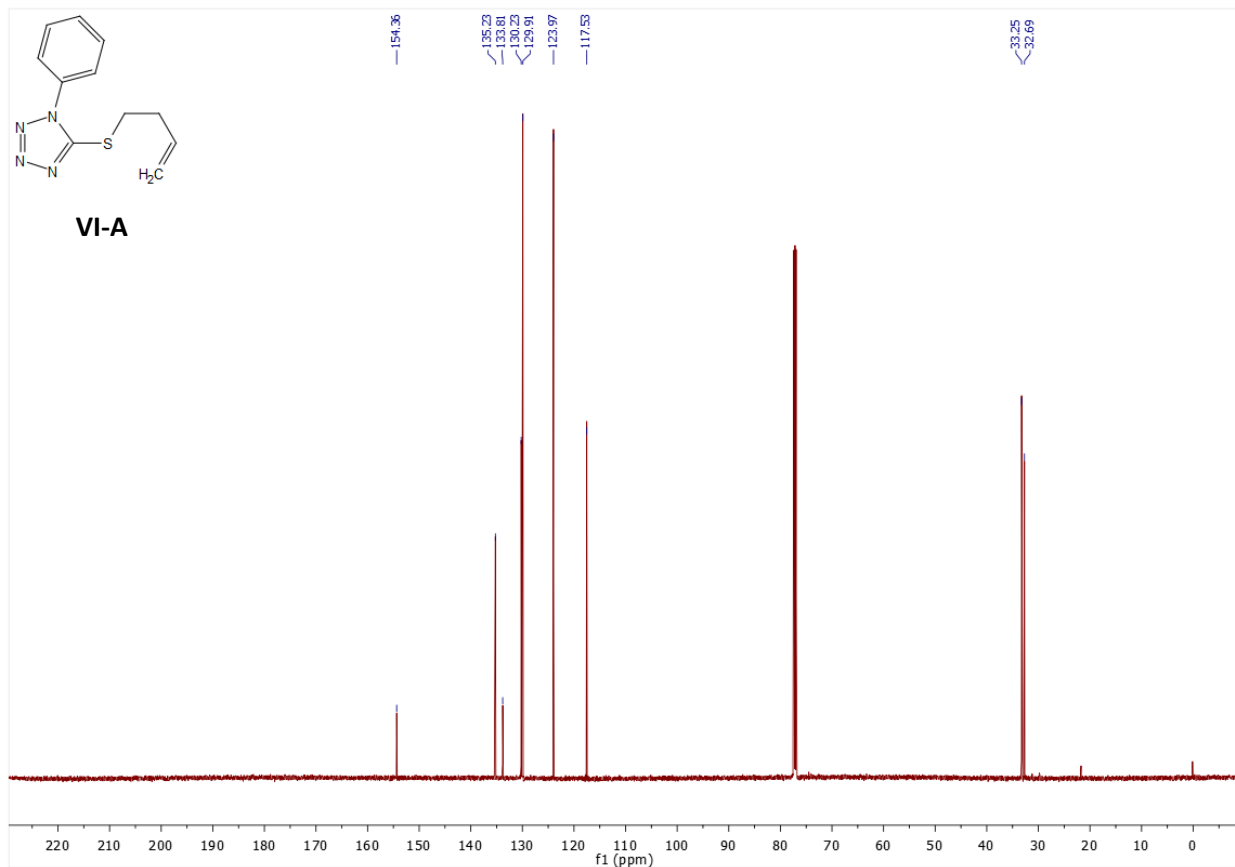

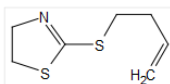

VI-B

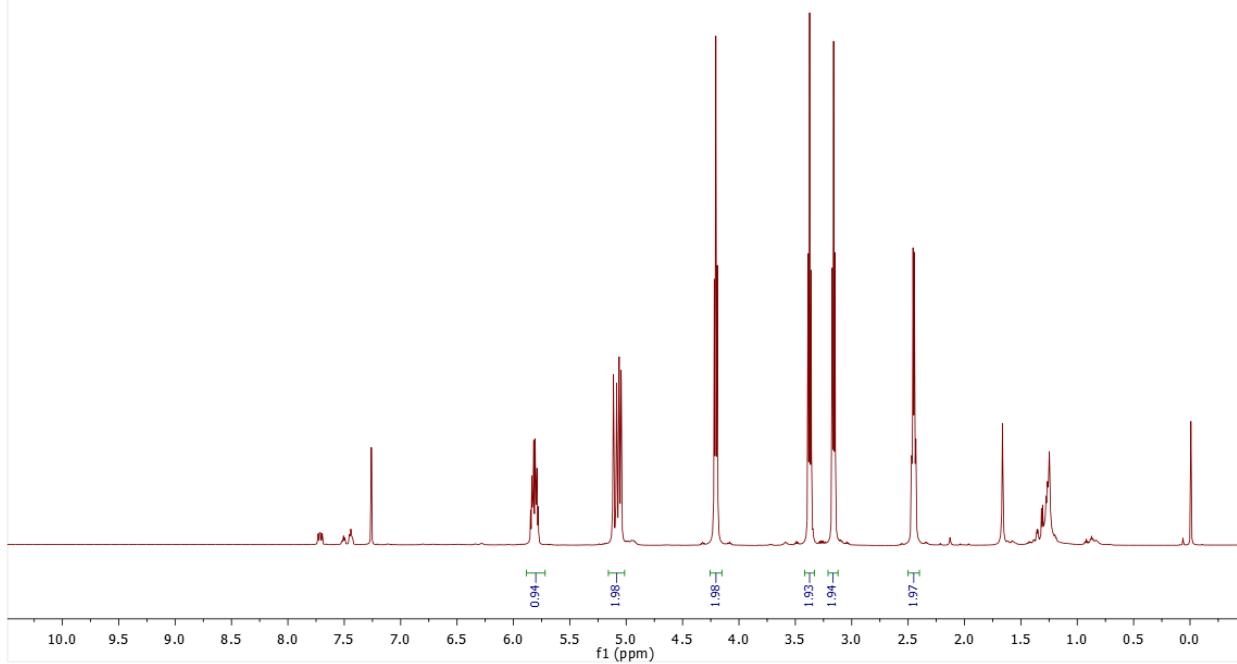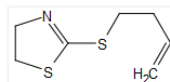

VI-B

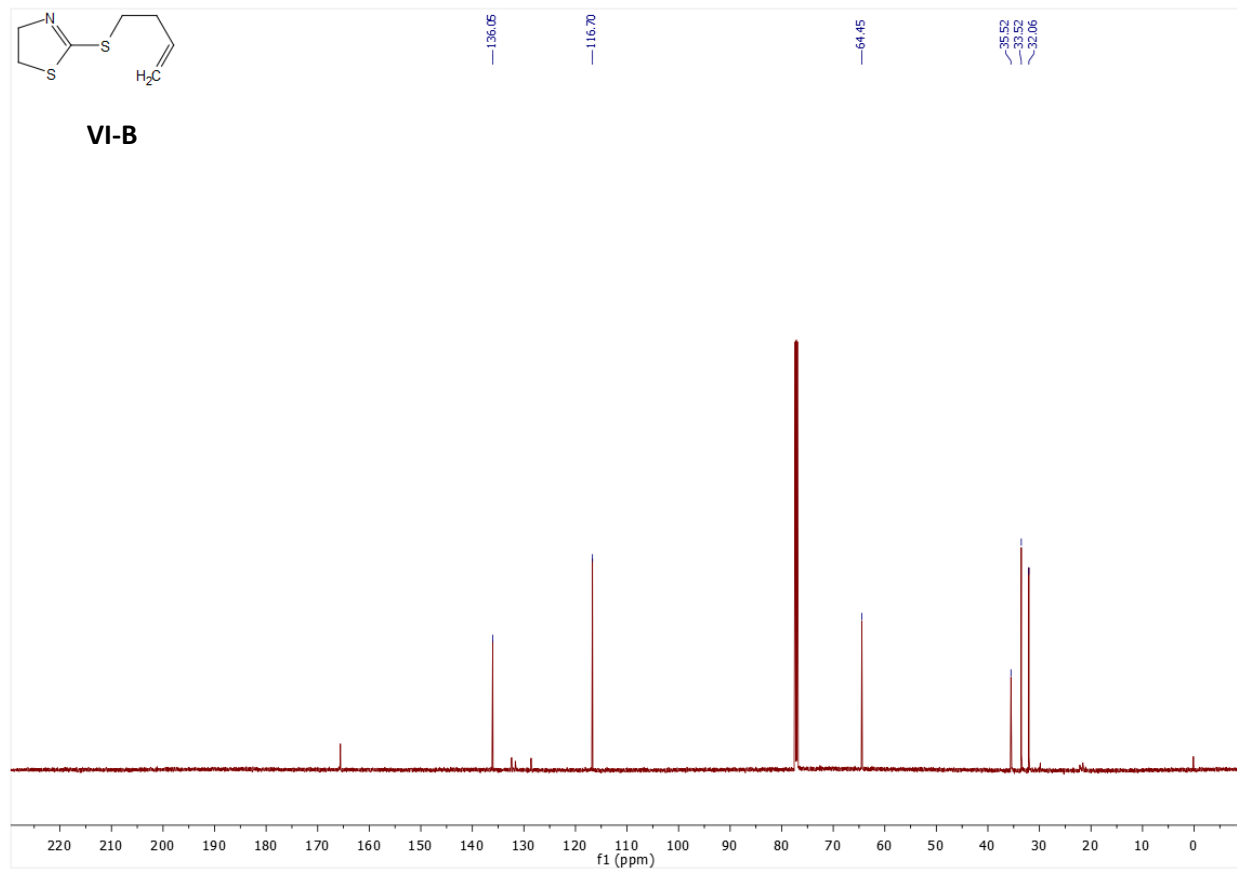



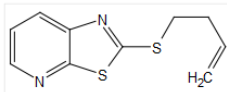

VI-C

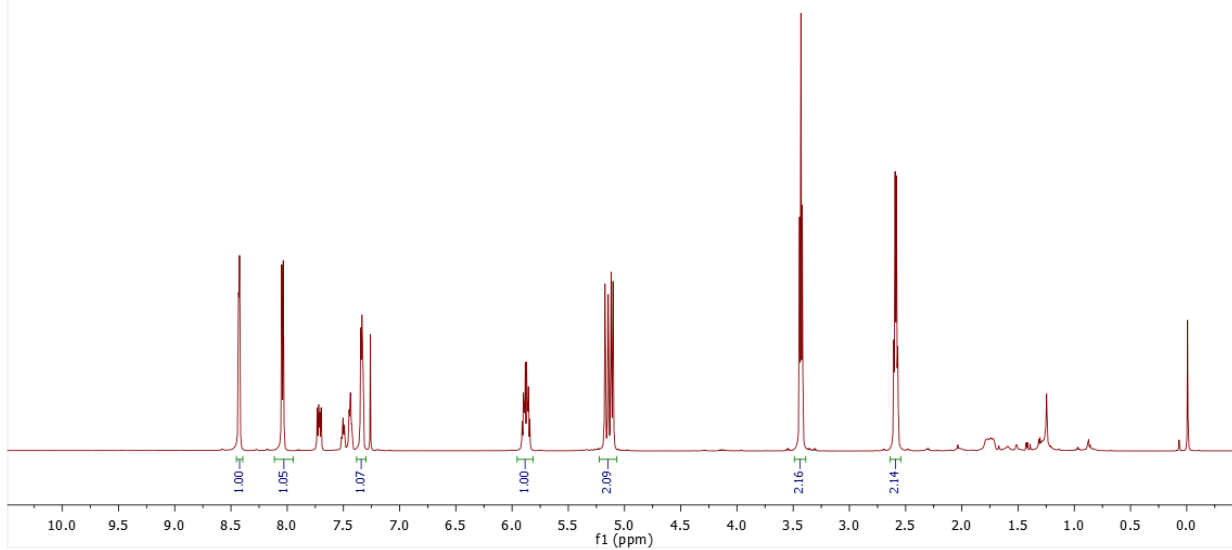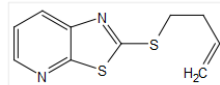

VI-C

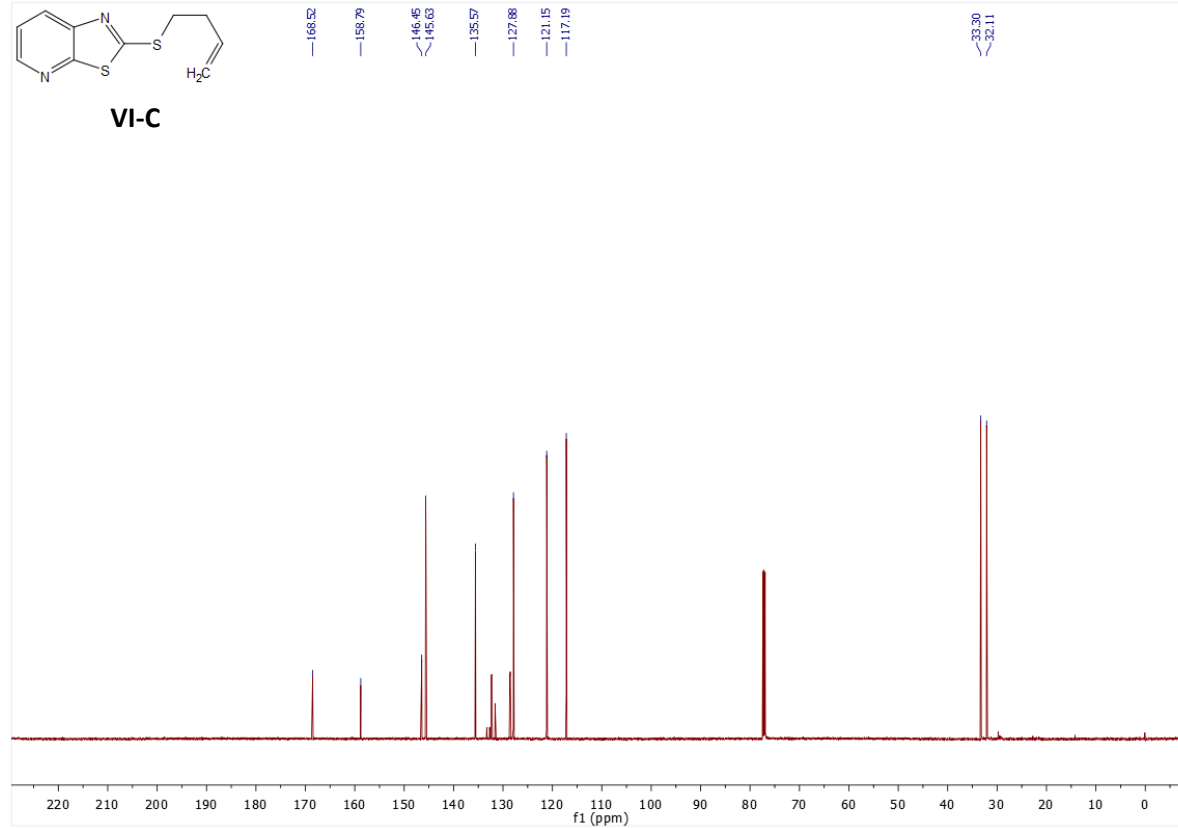

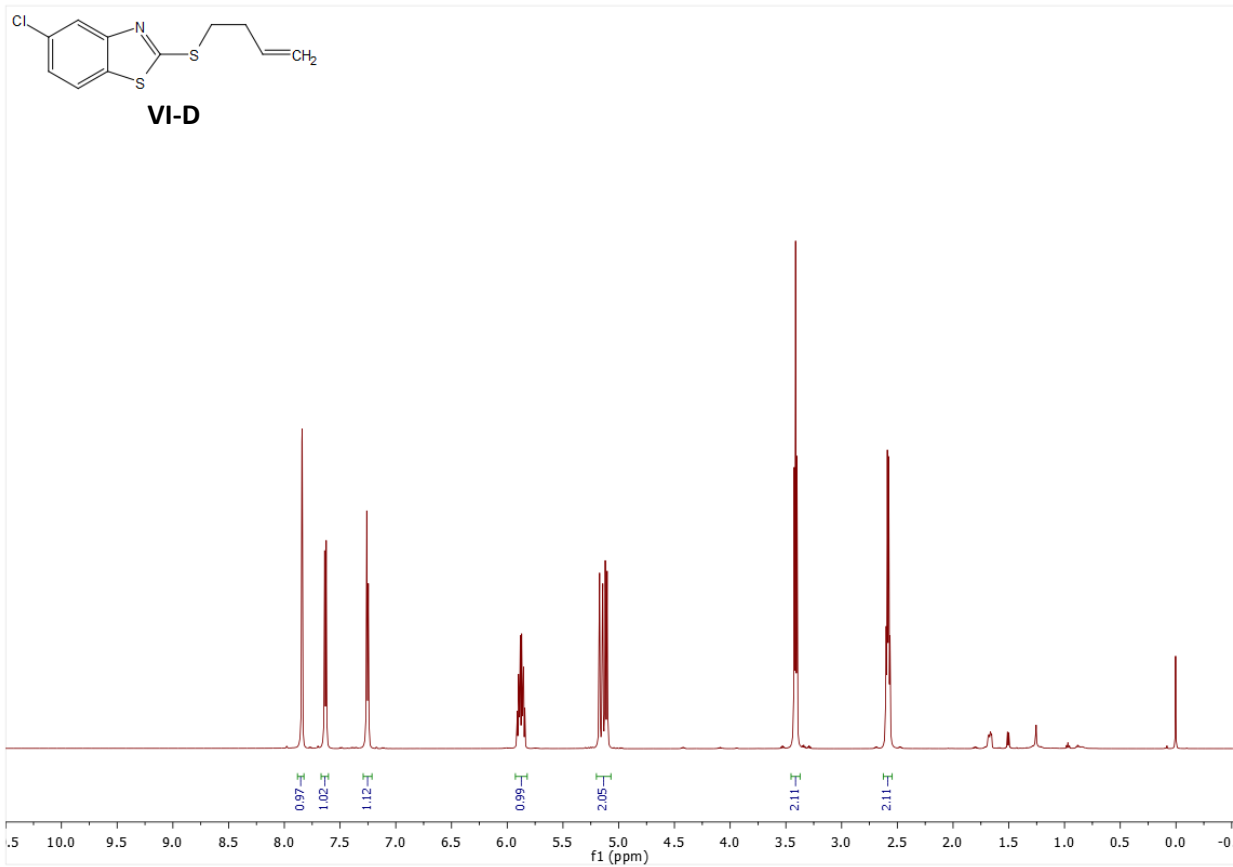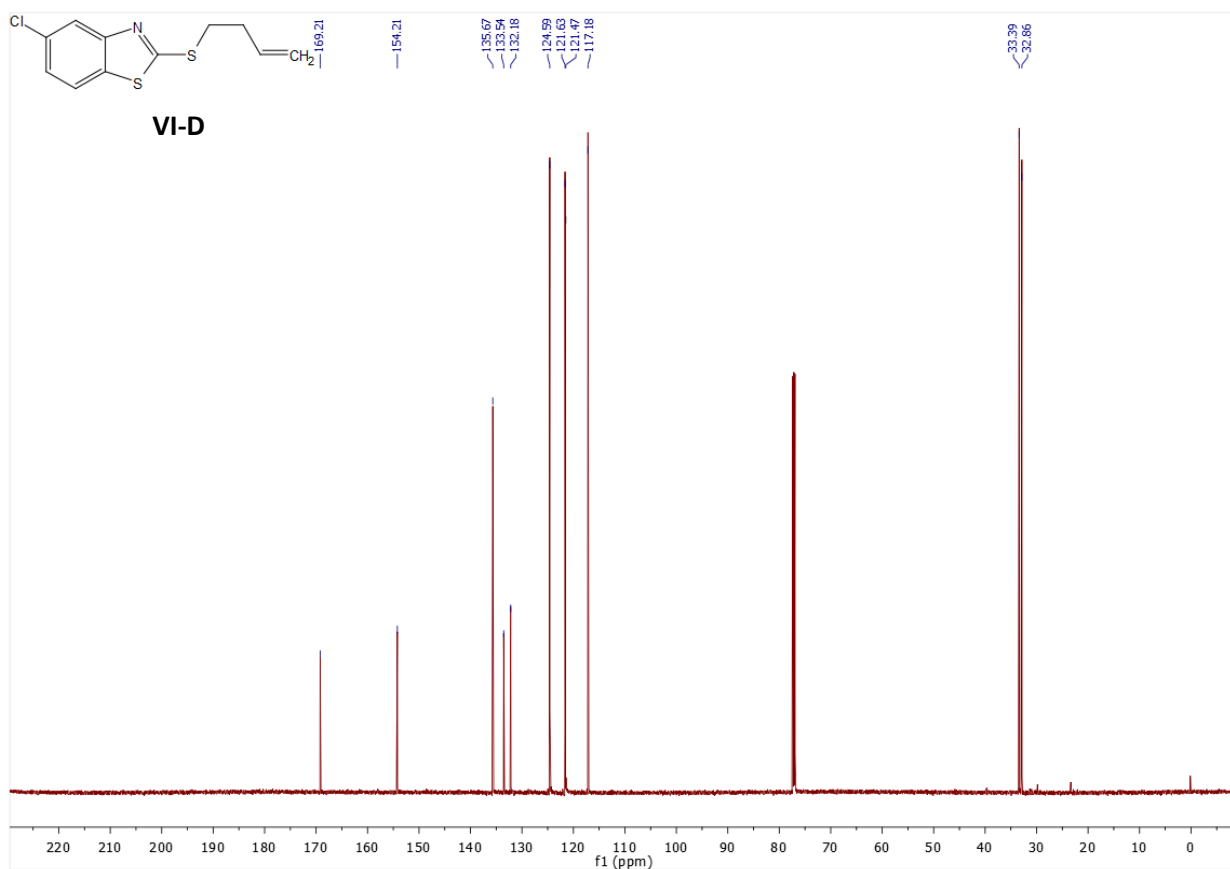

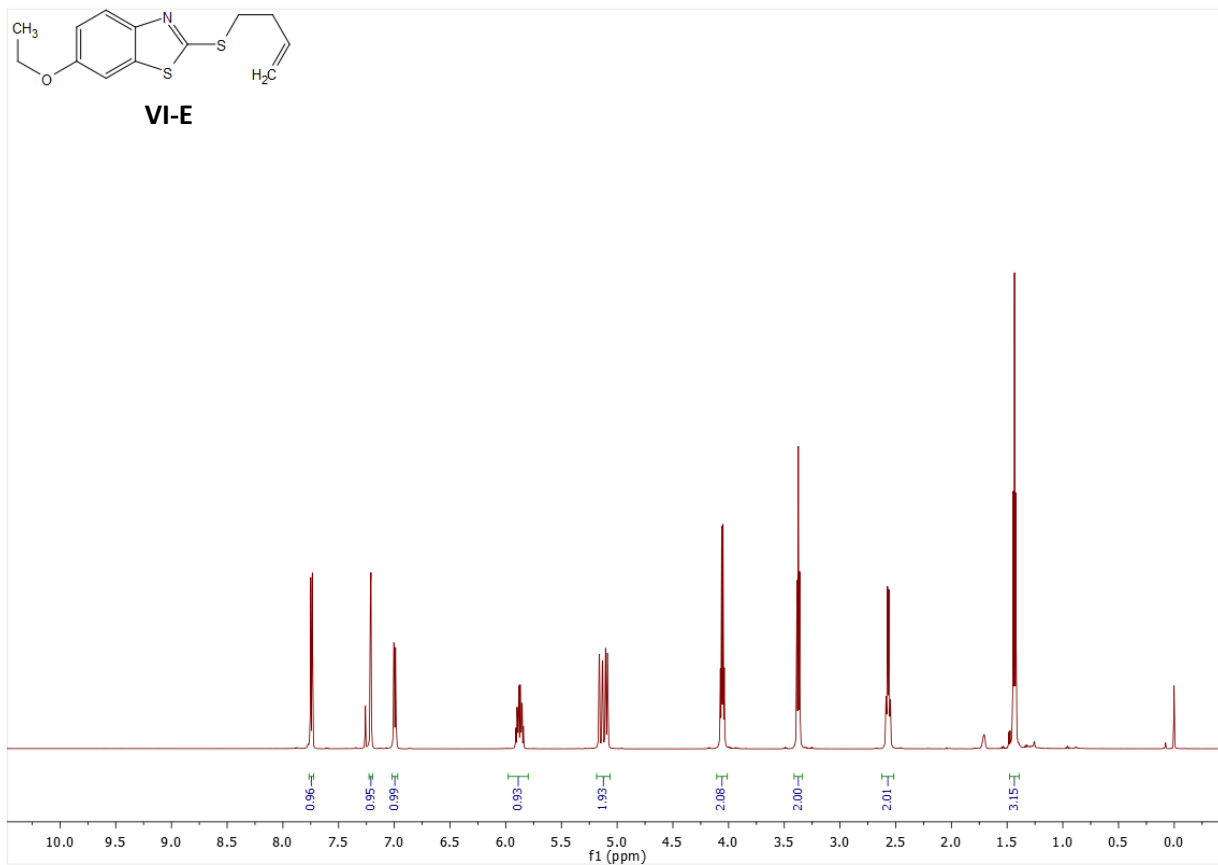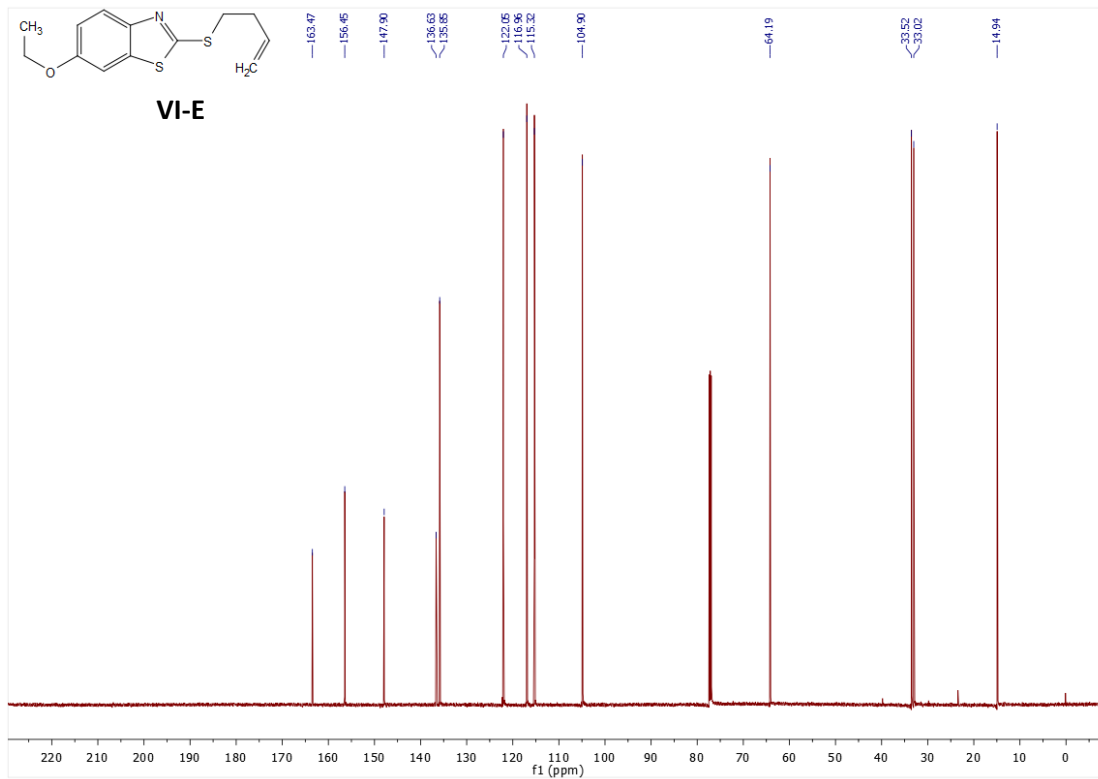

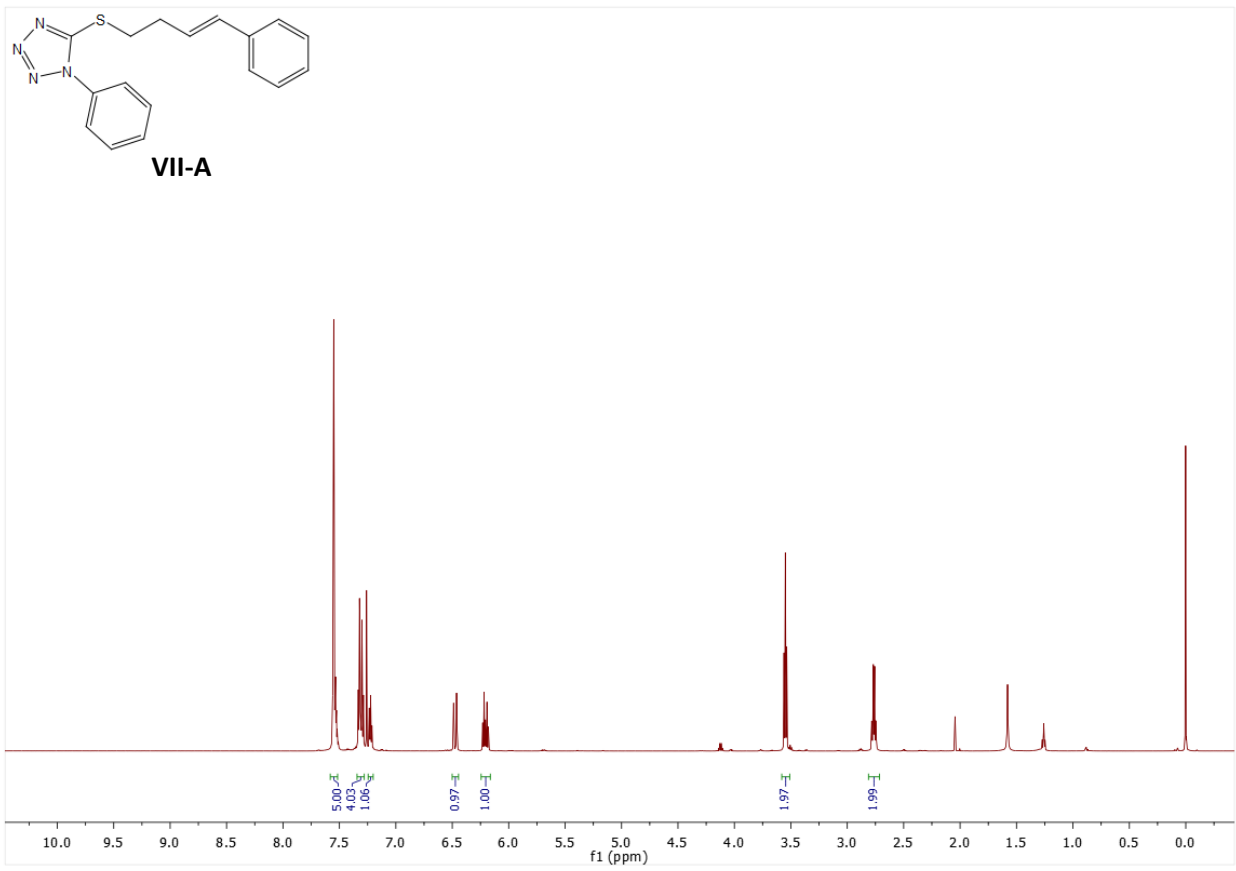

**VII-A**

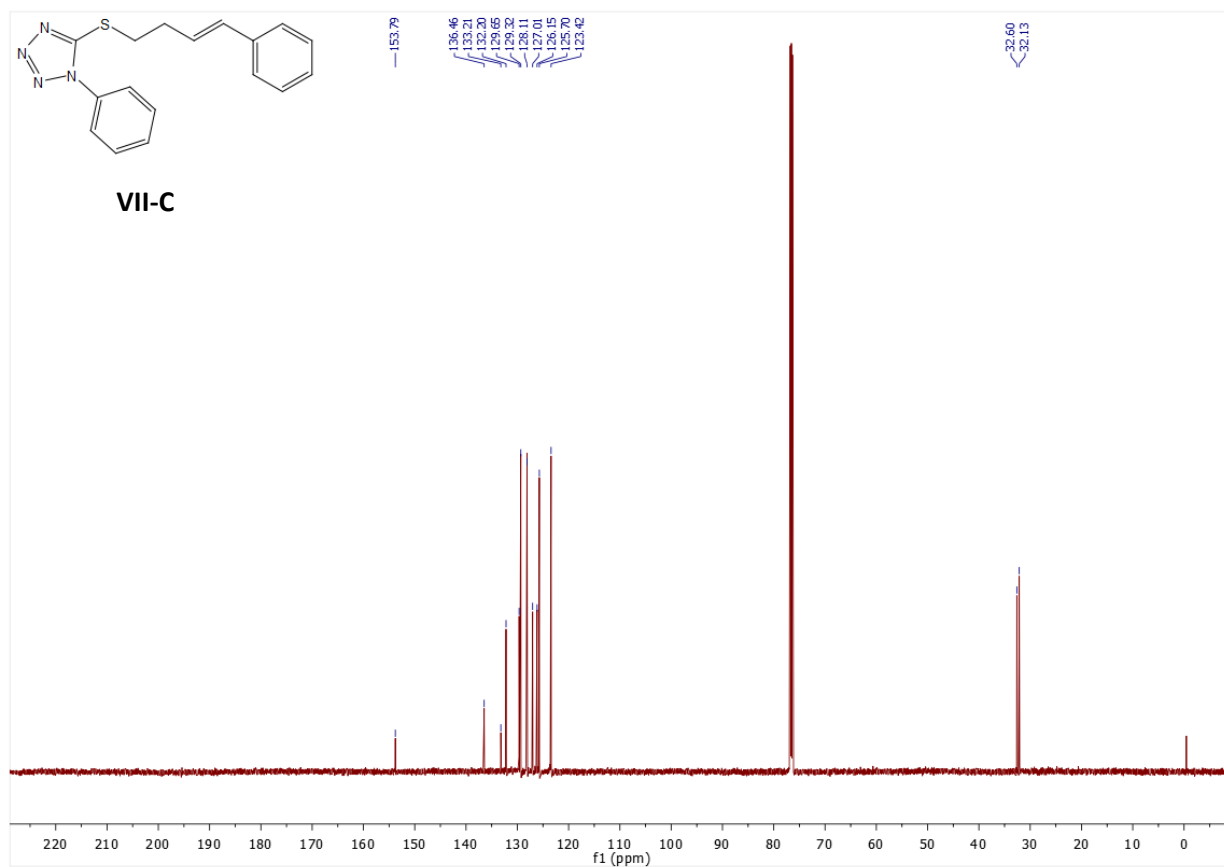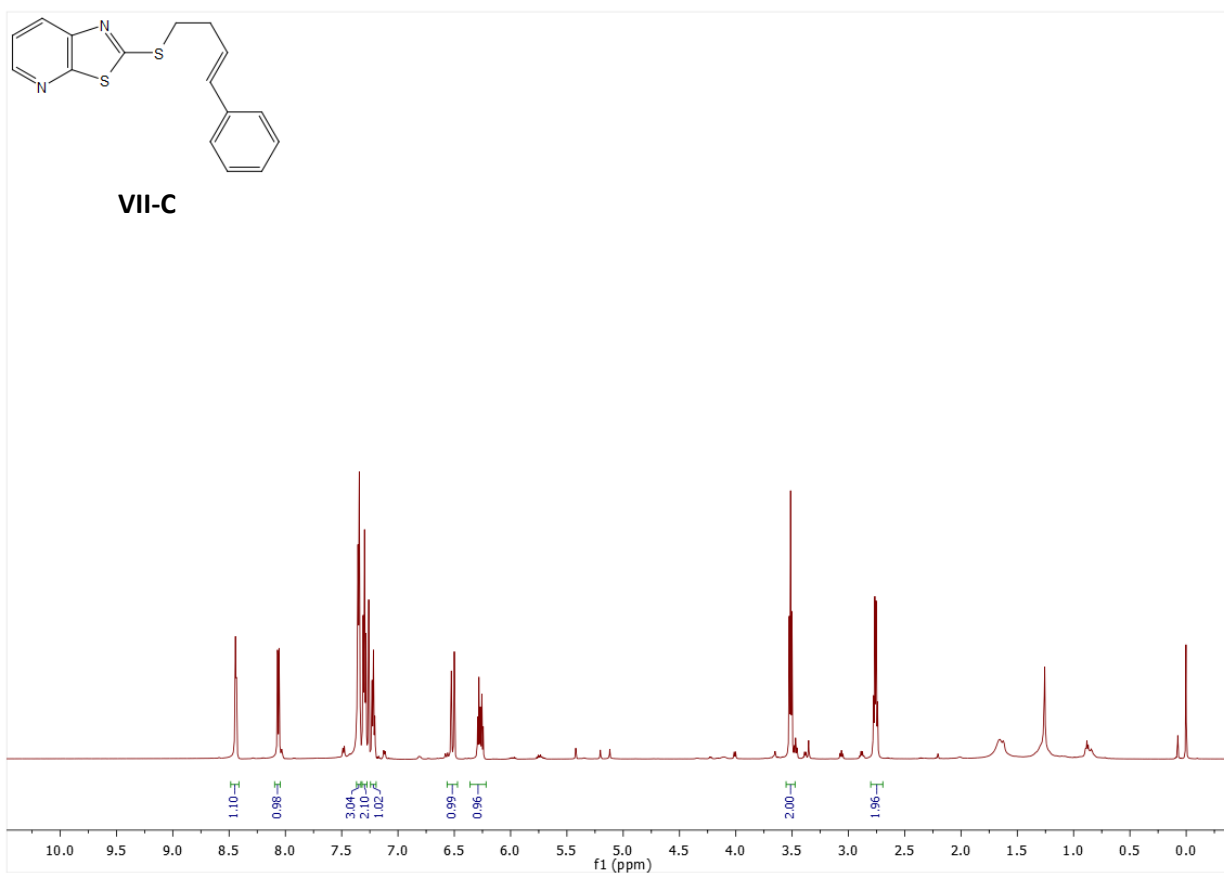

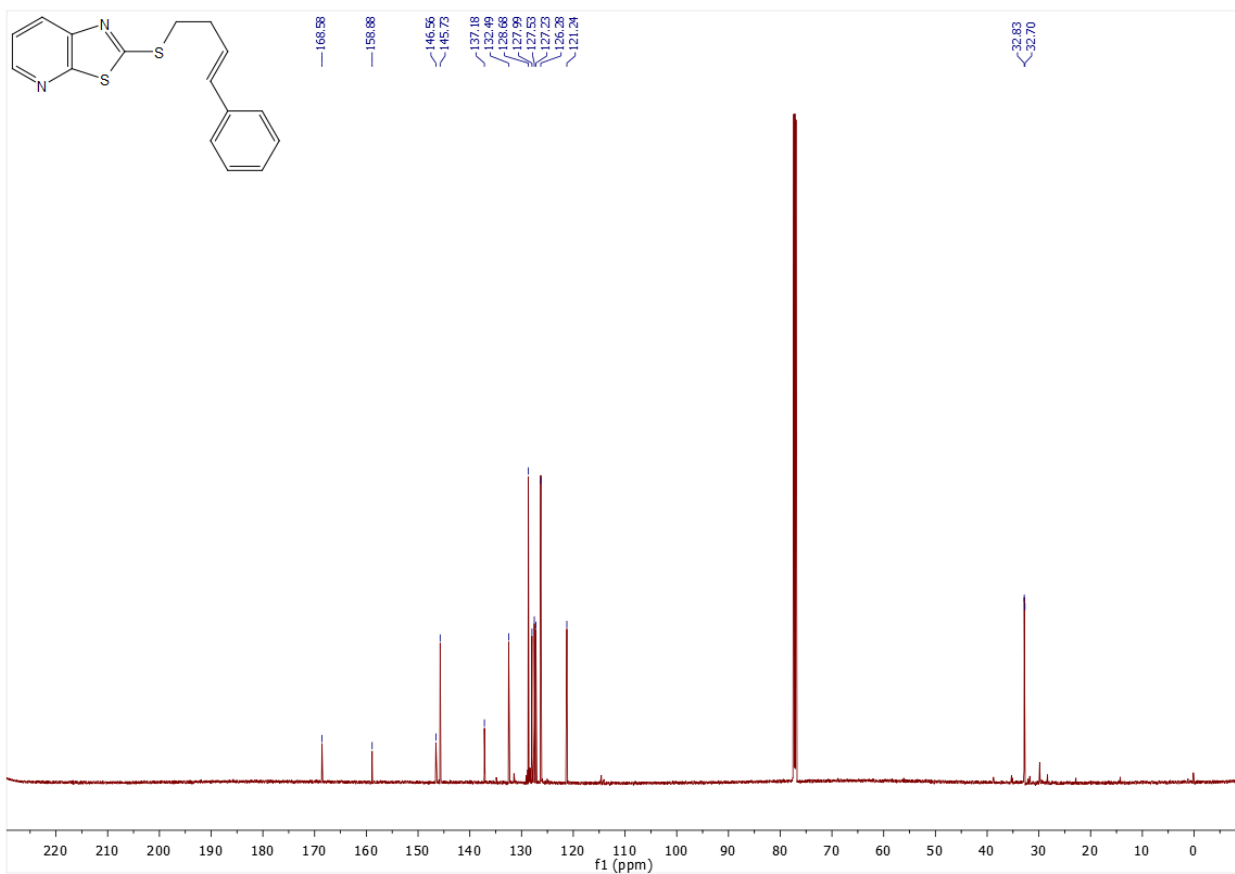

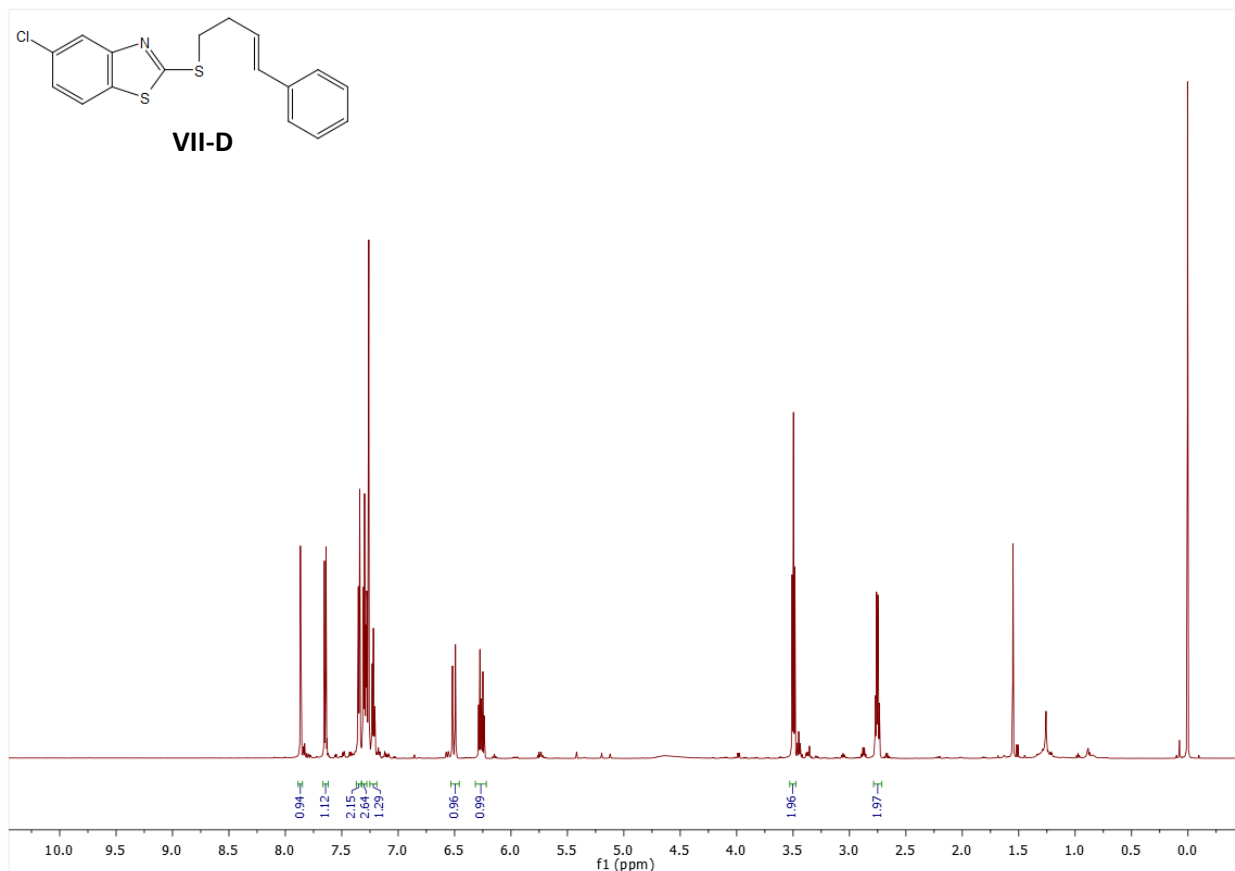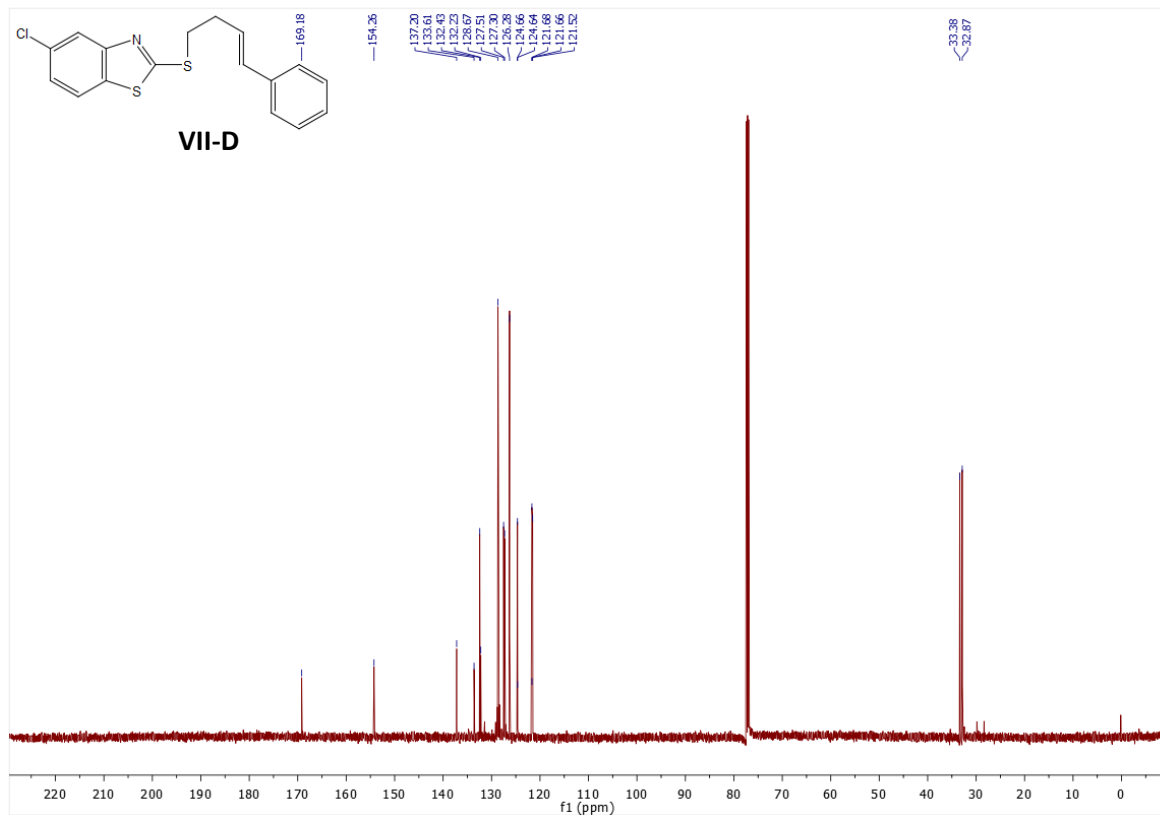

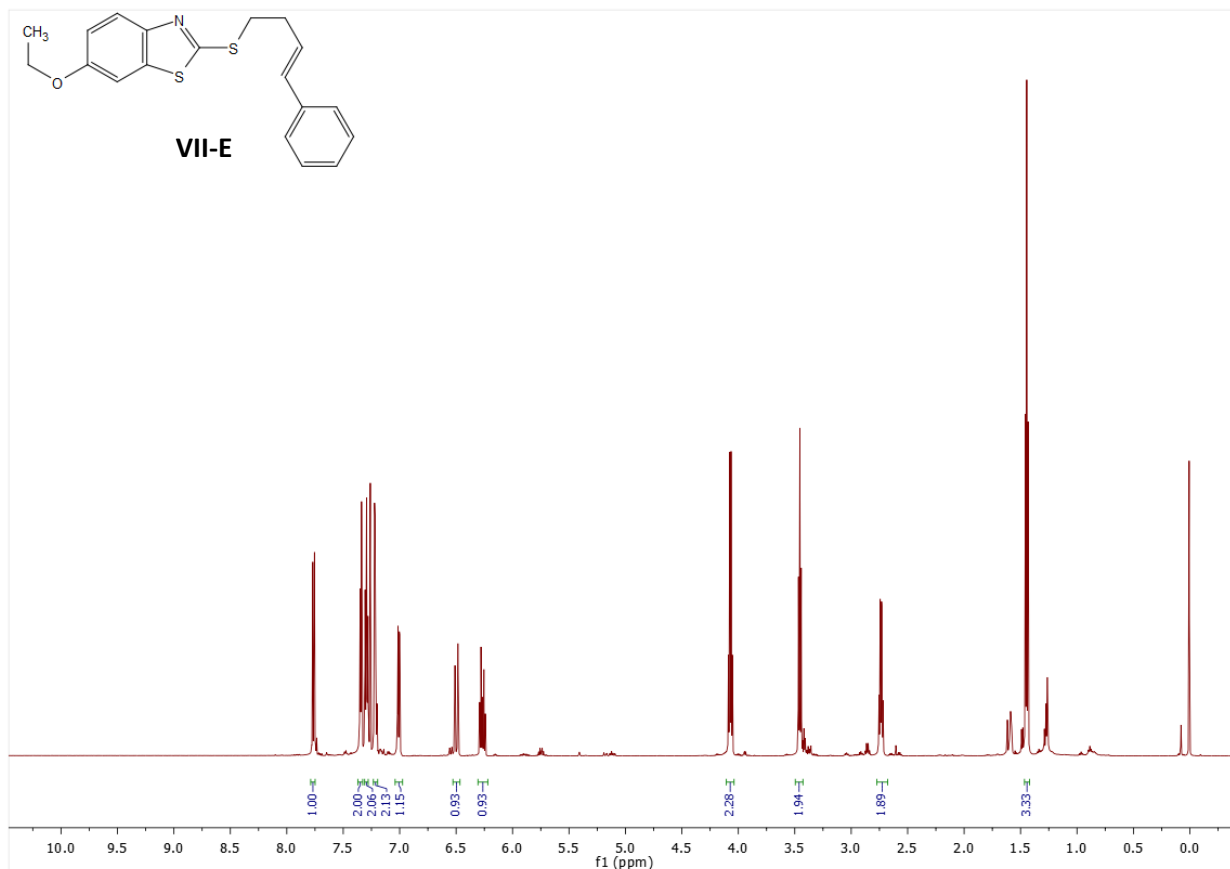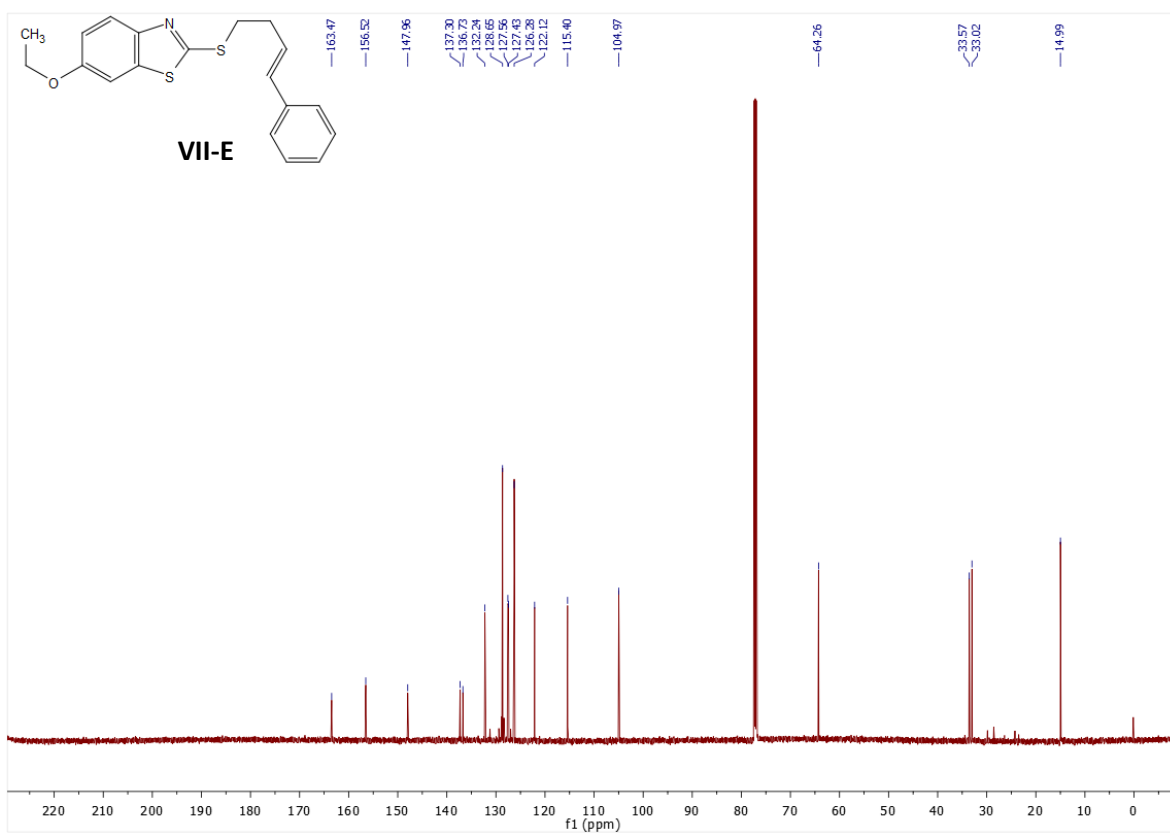



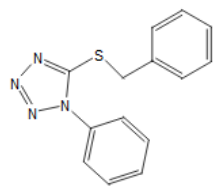

VIII-F

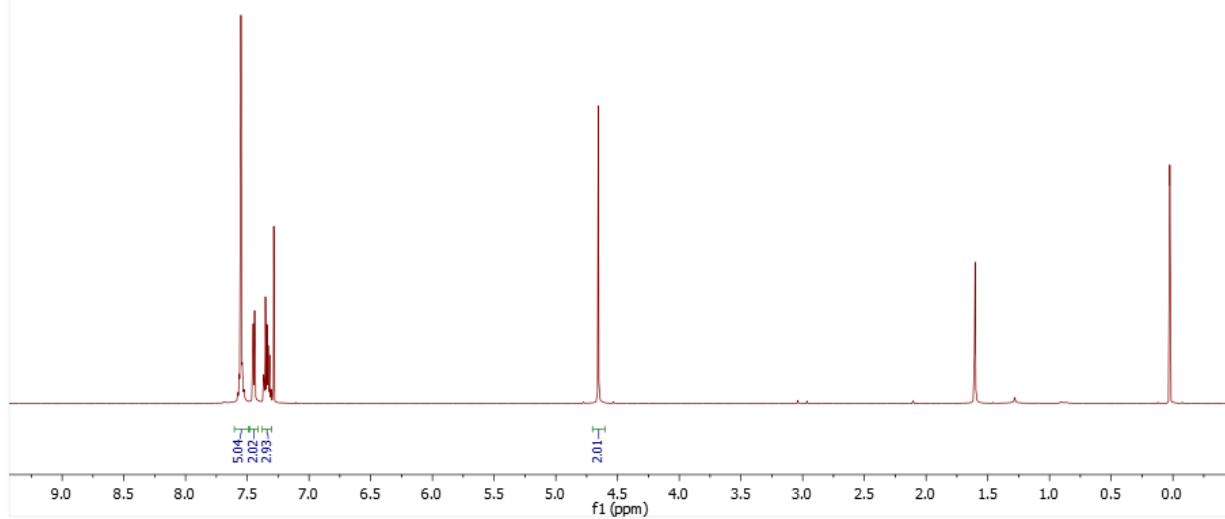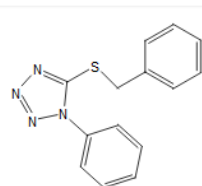

VIII-F

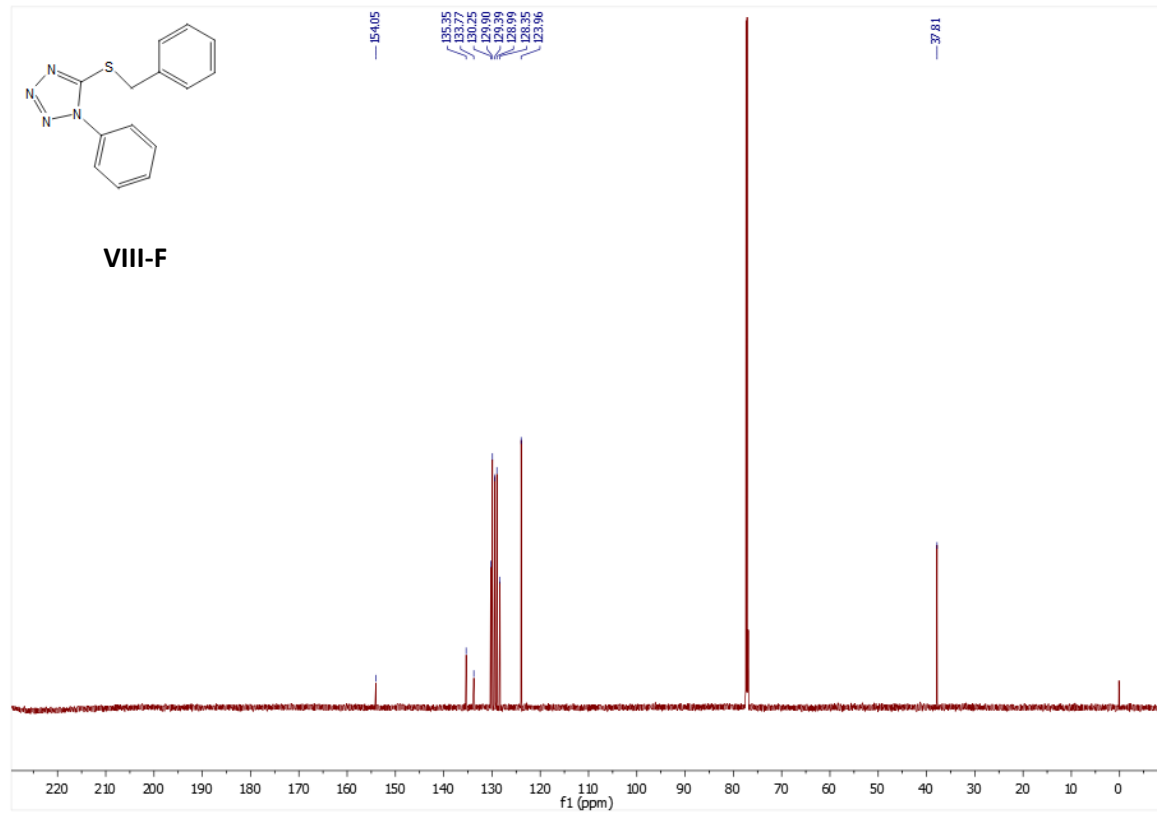

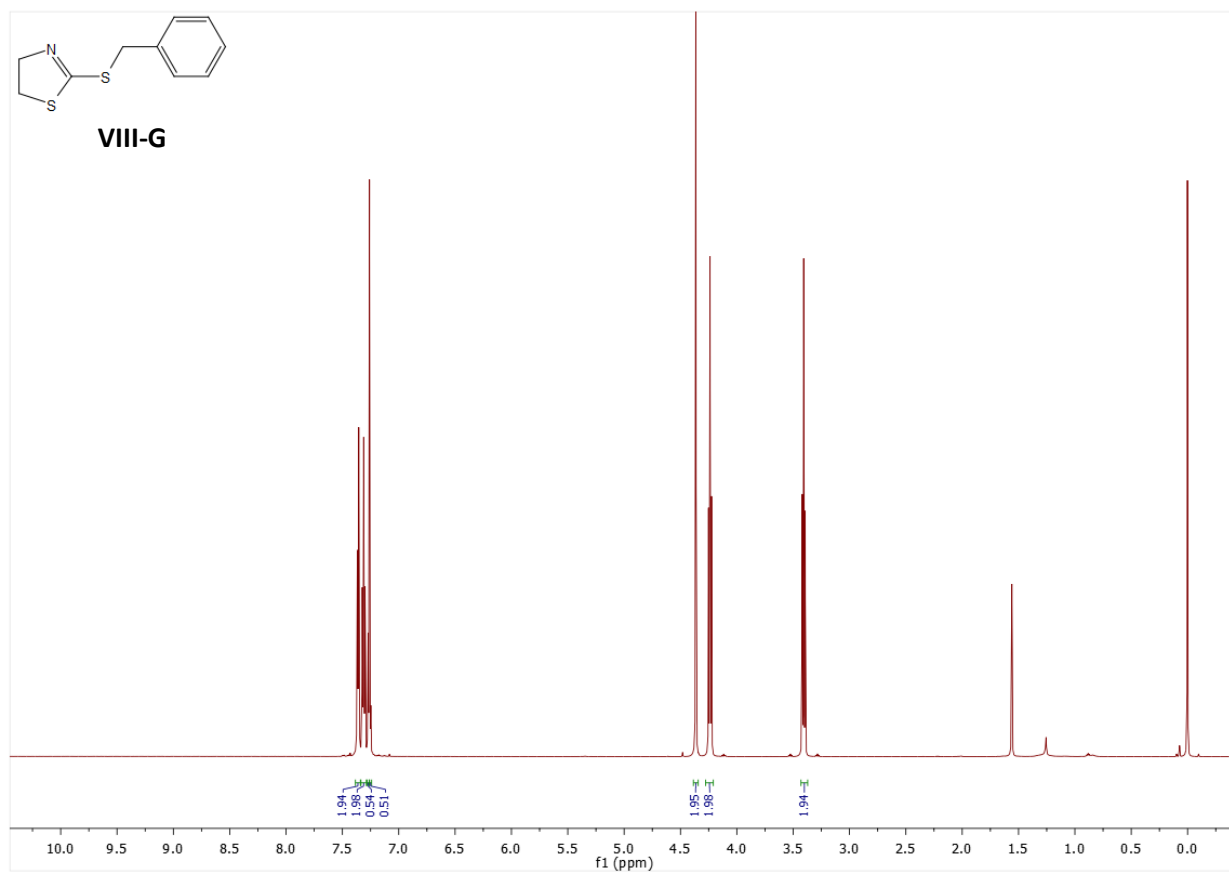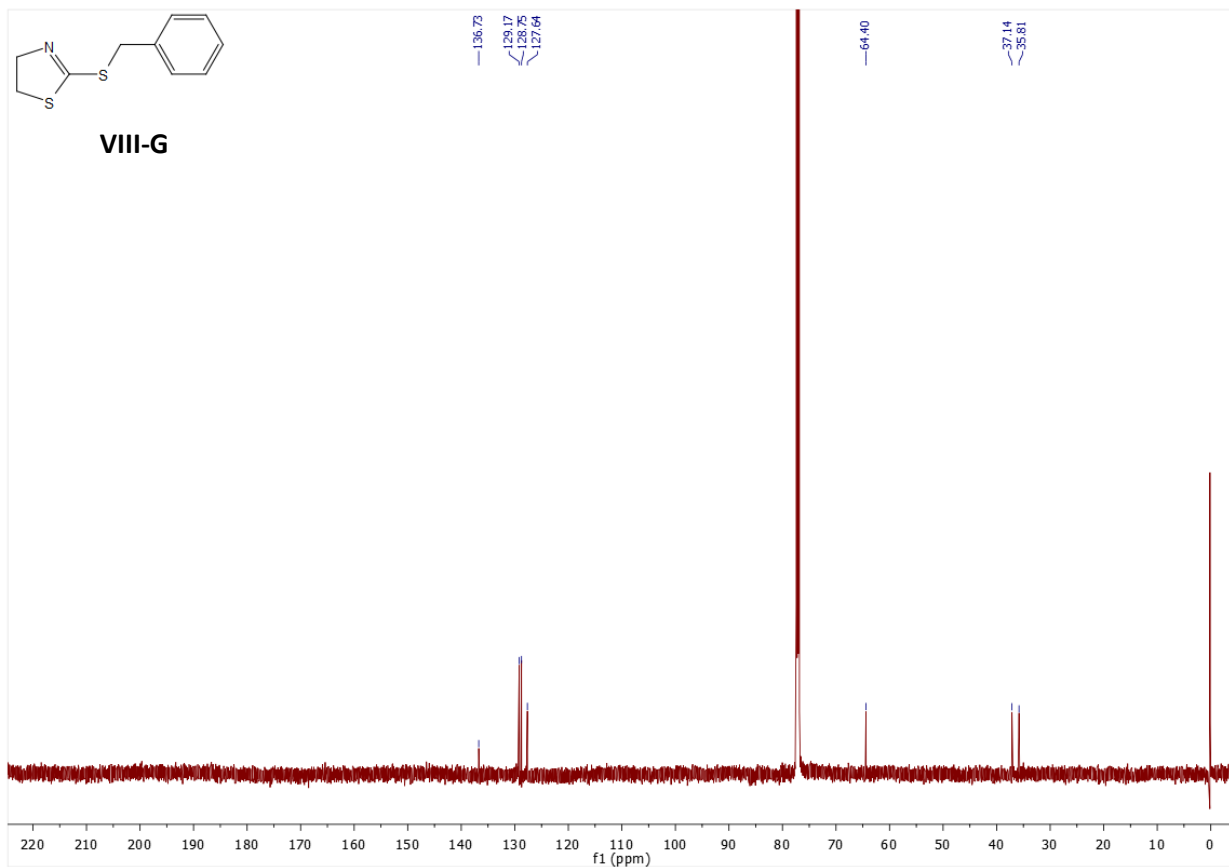

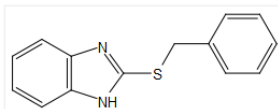

VIII-H

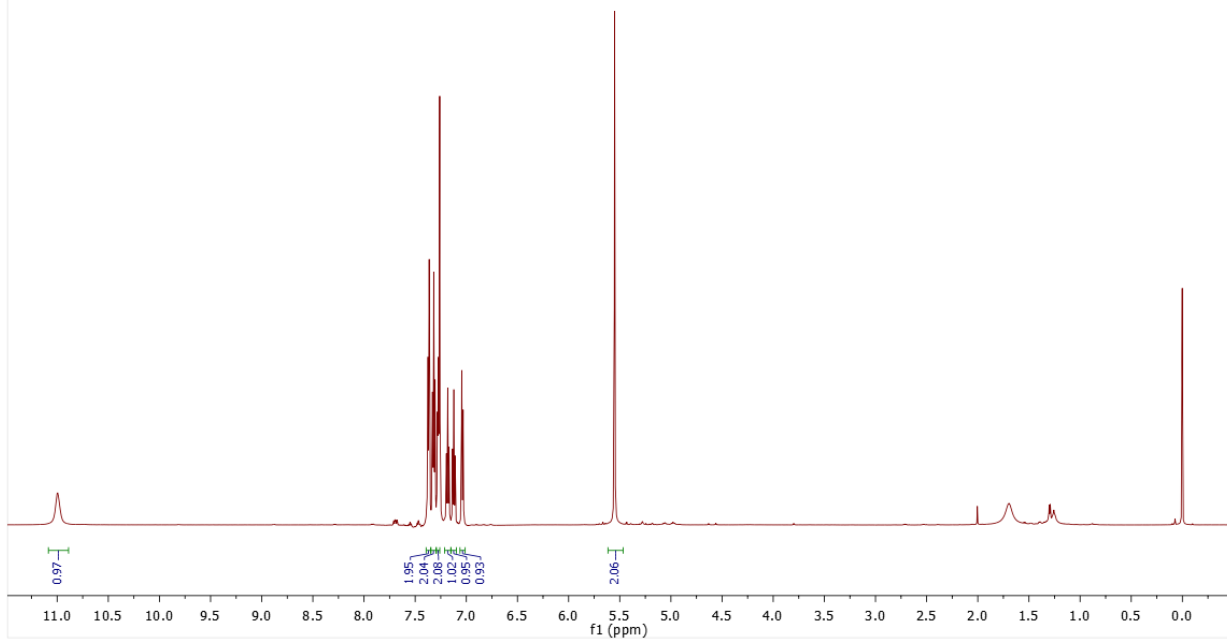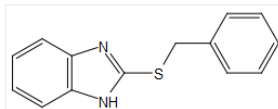

VIII-H

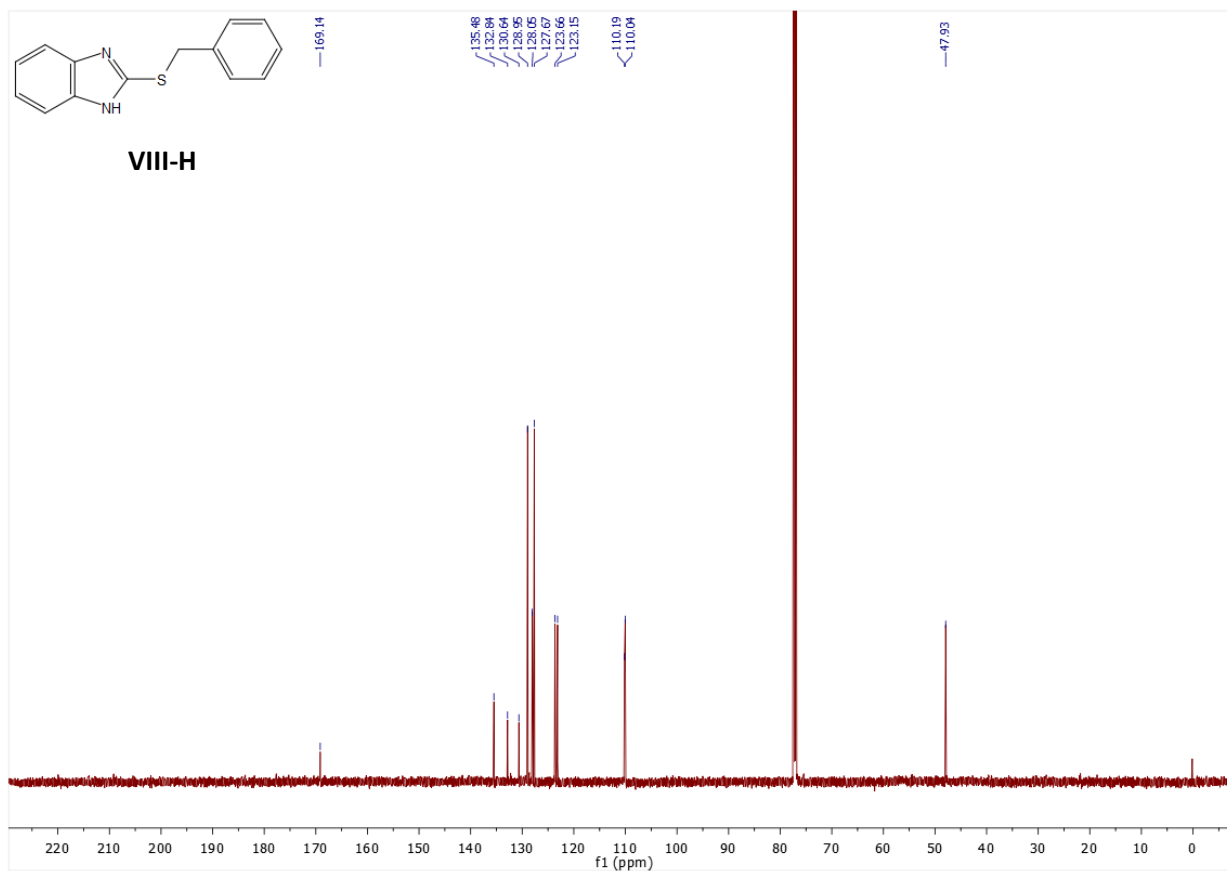

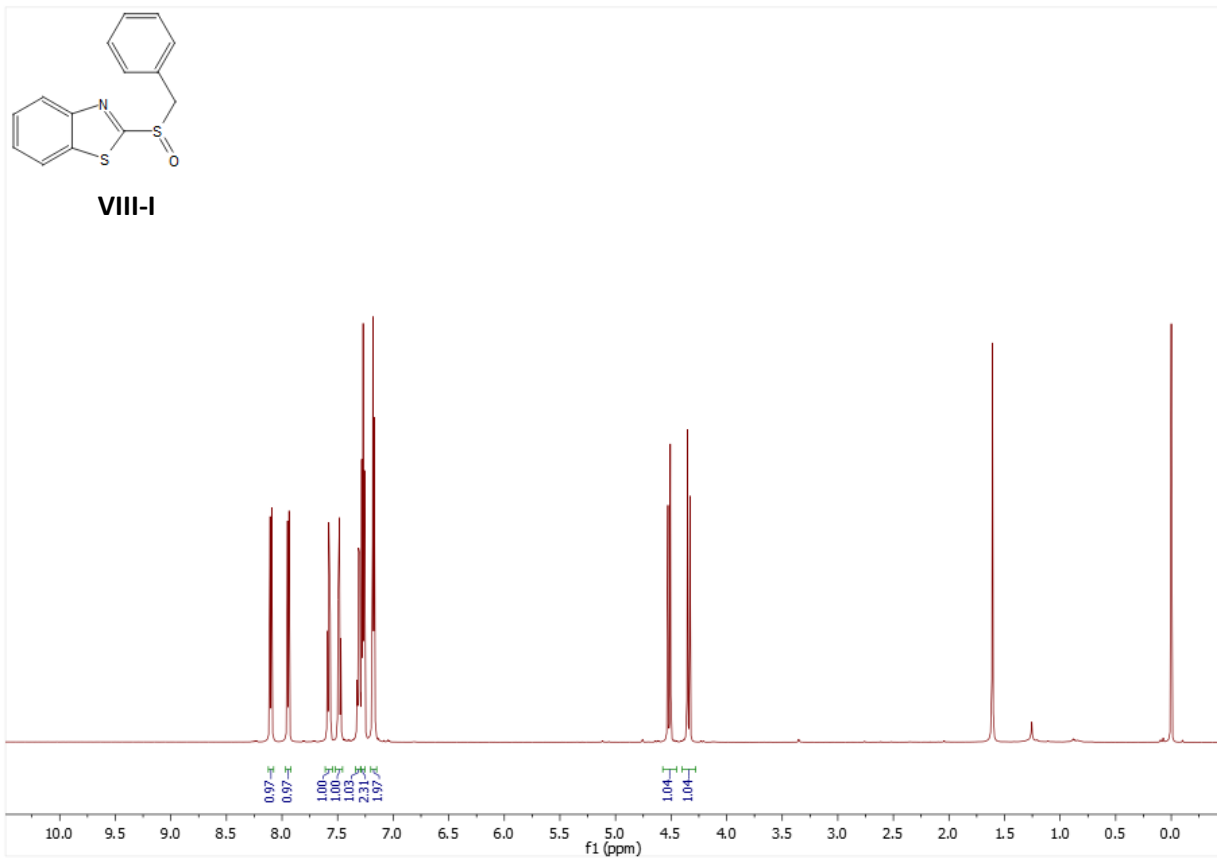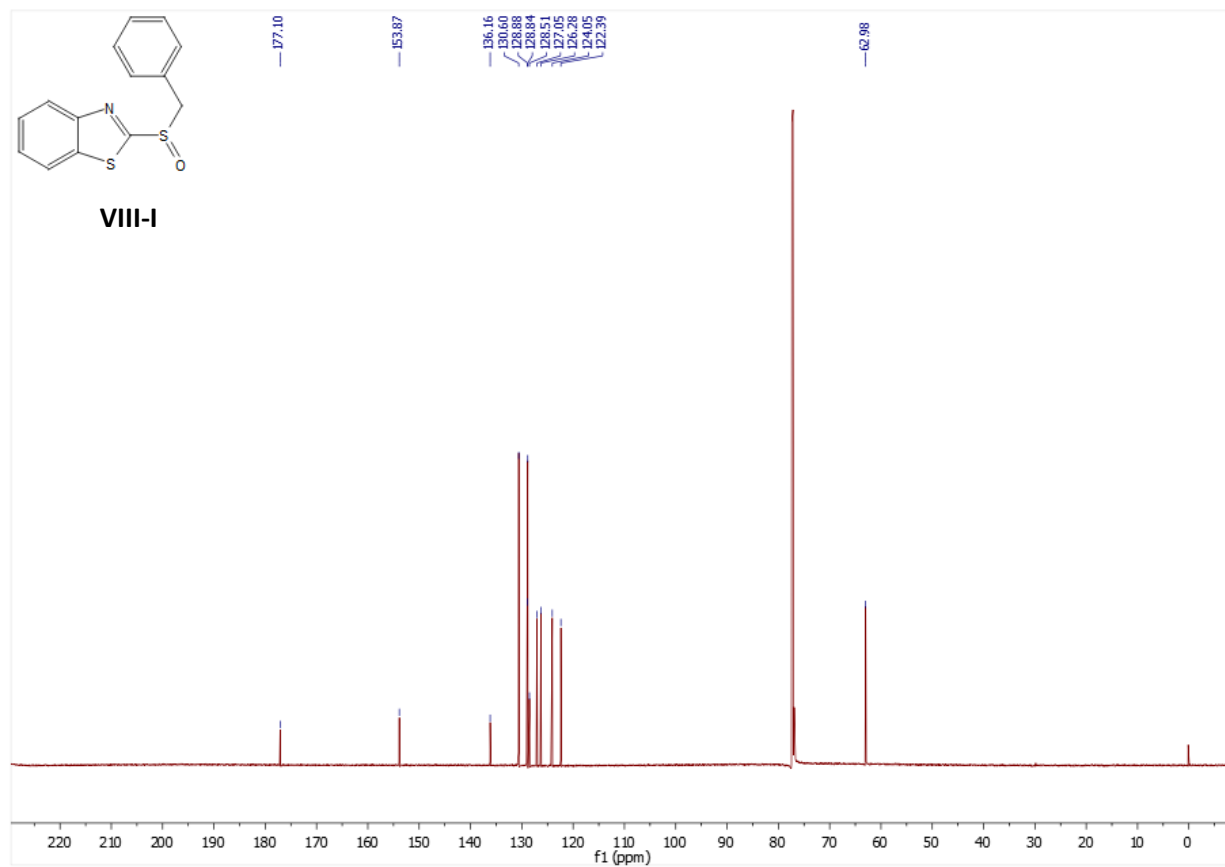

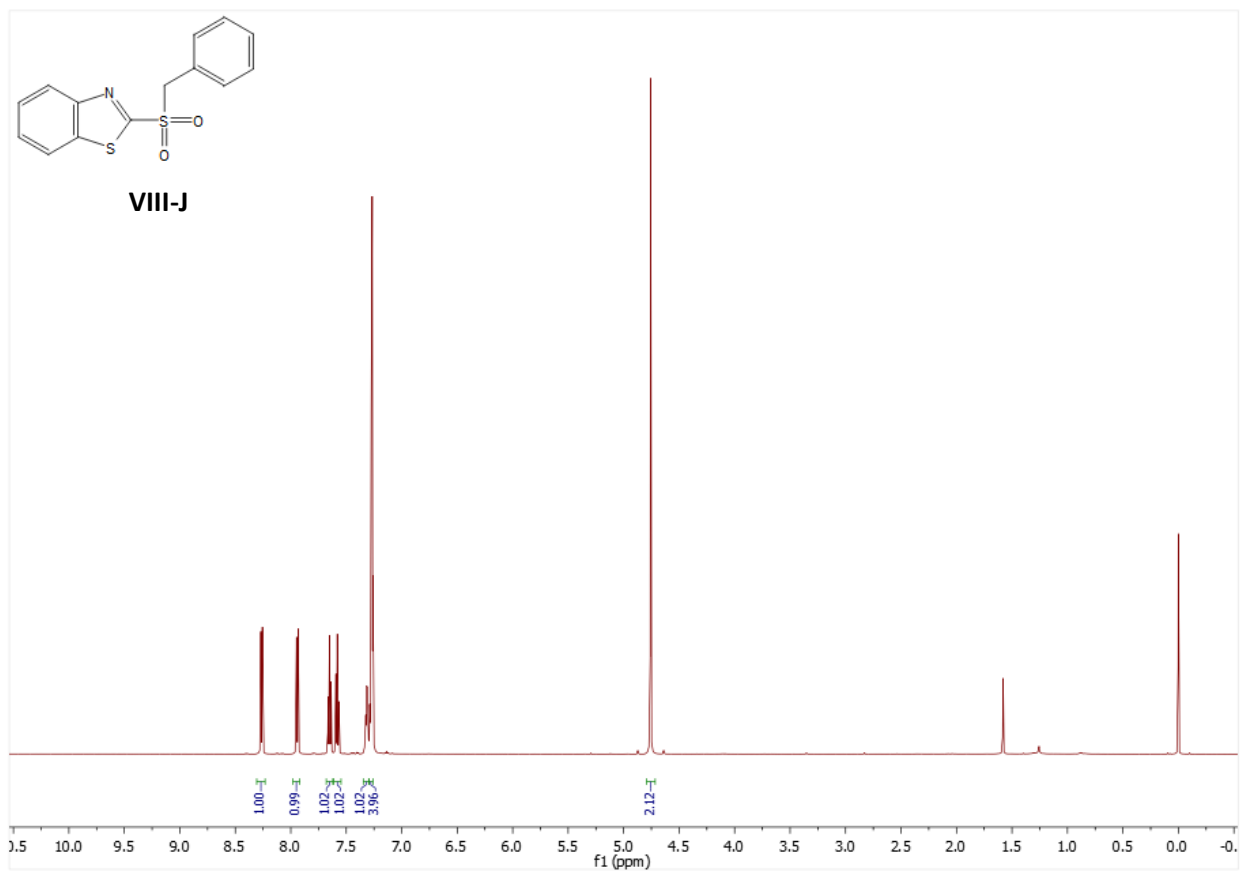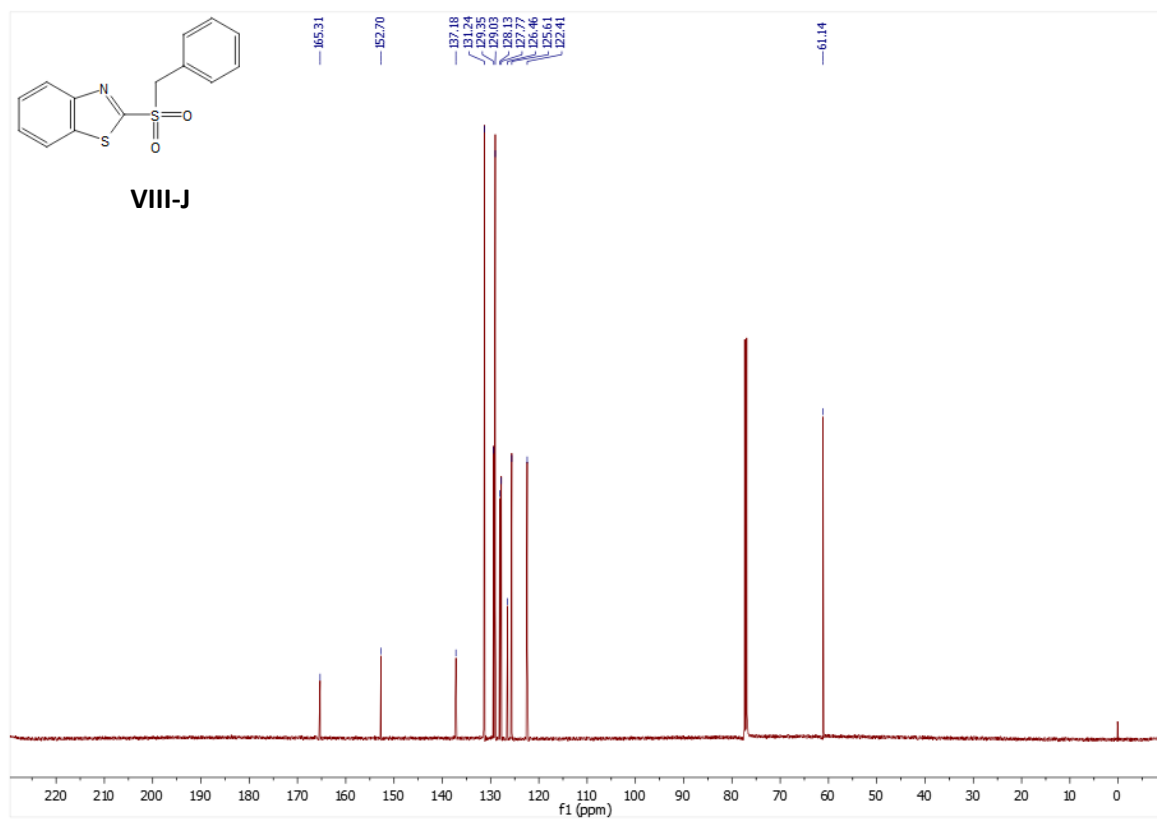

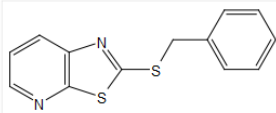

VIII-K

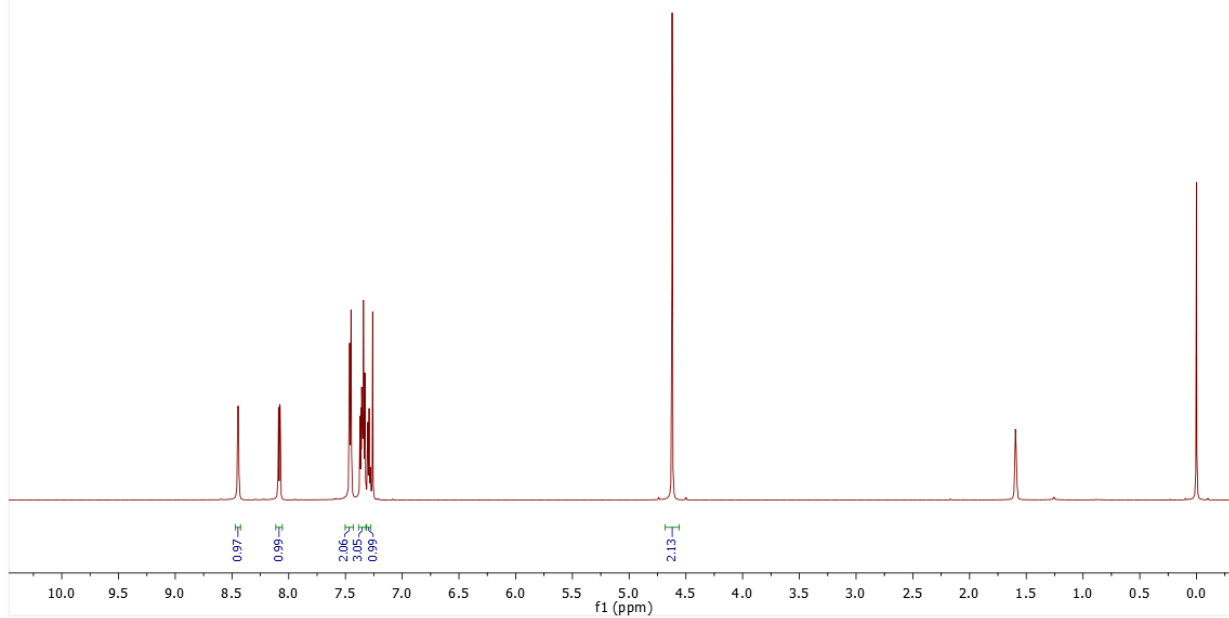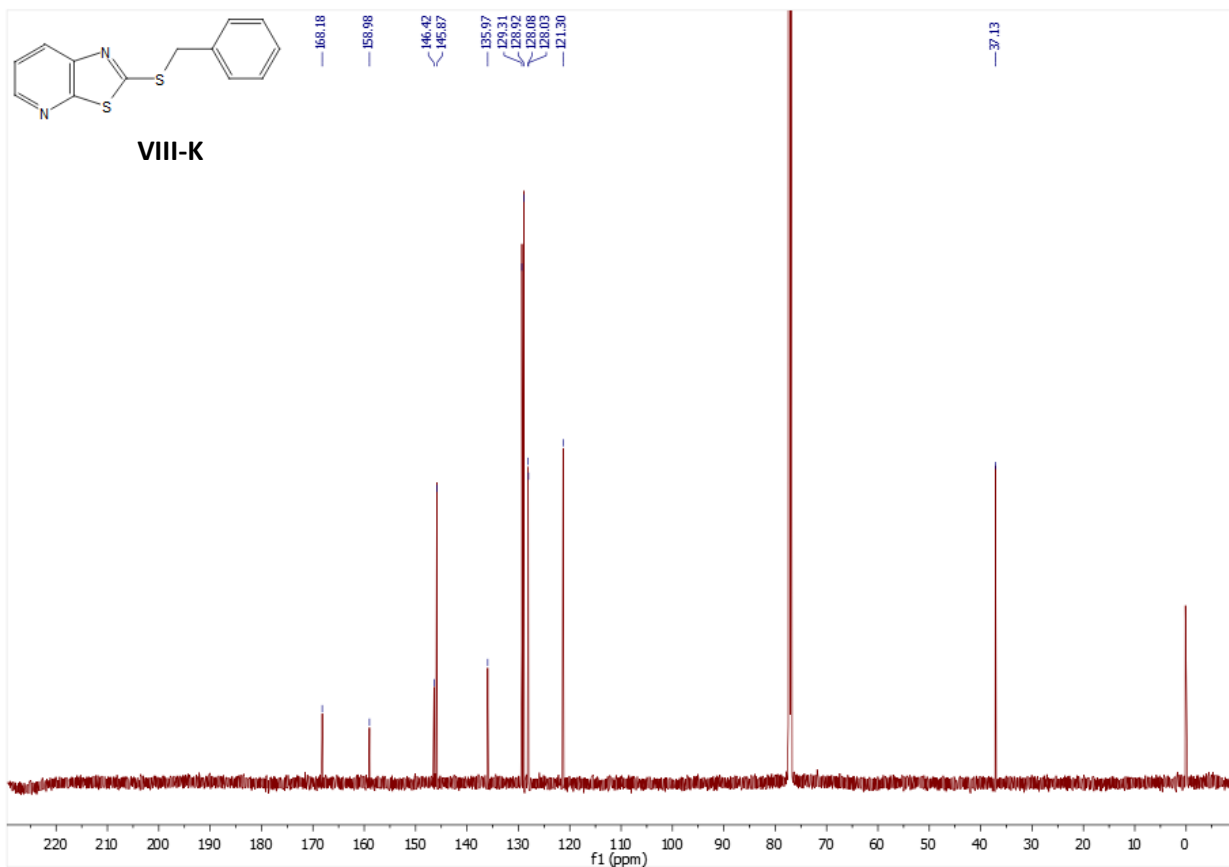

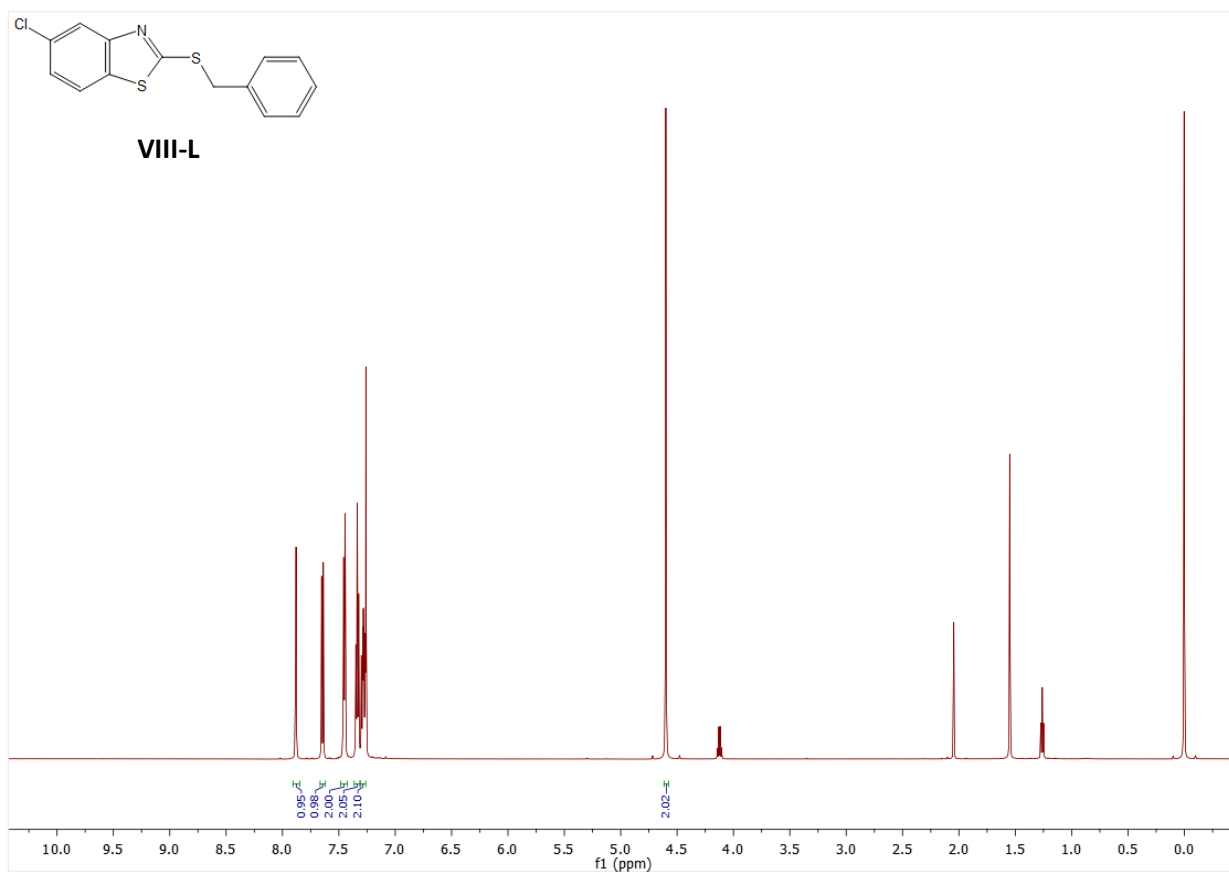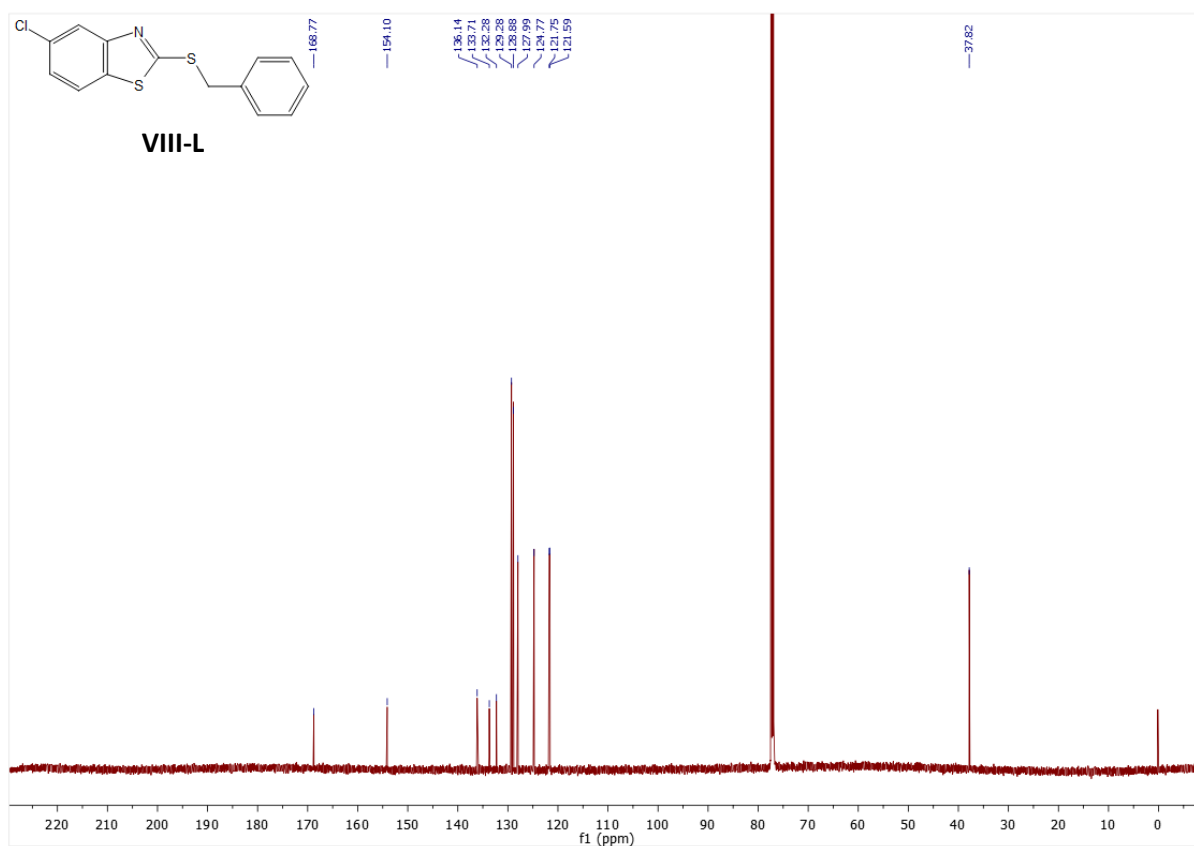

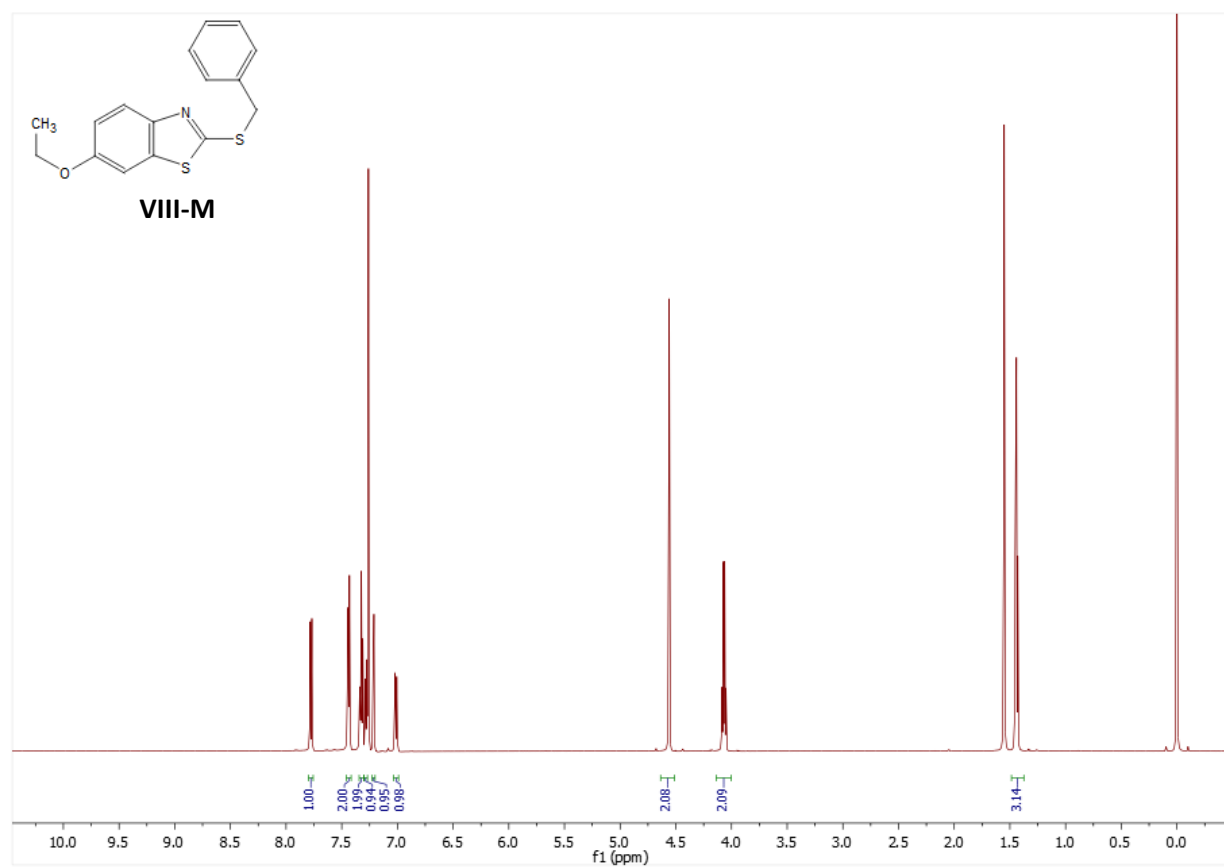

**VIII-M**



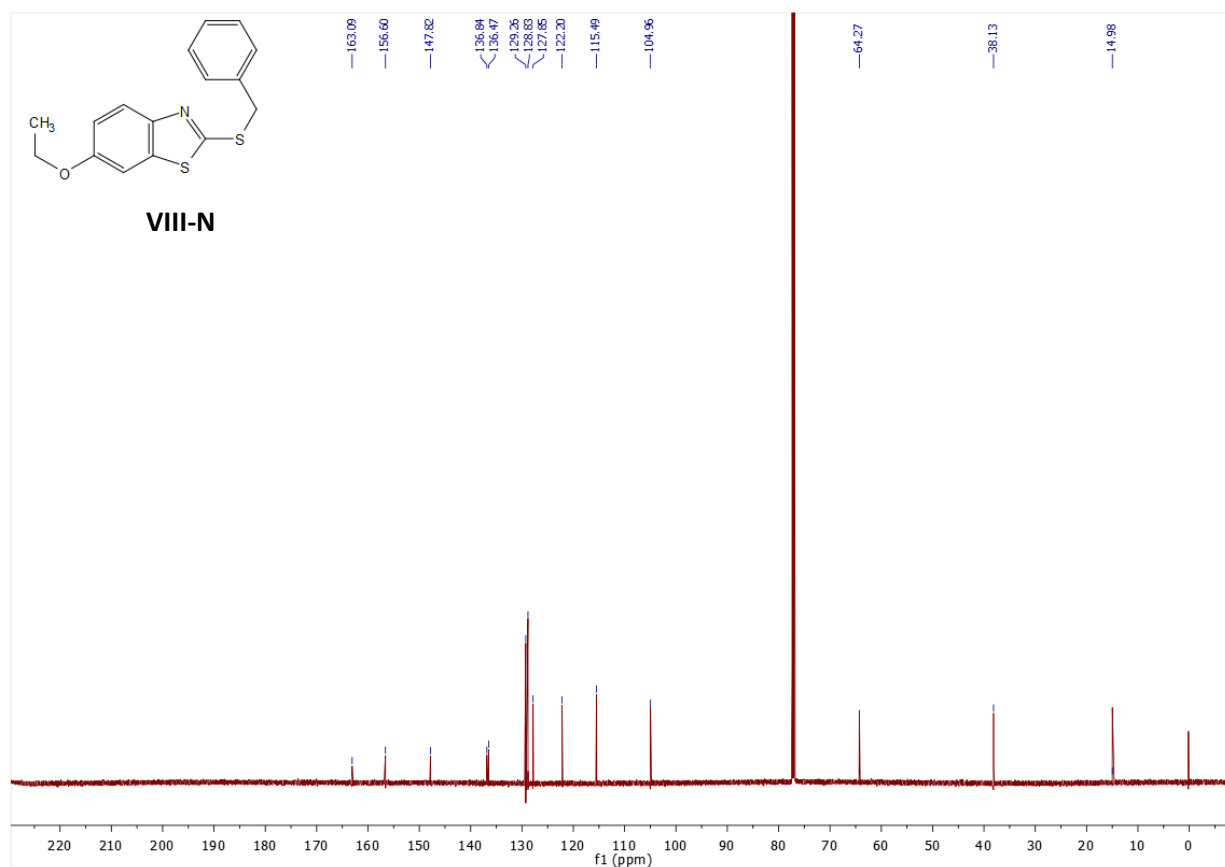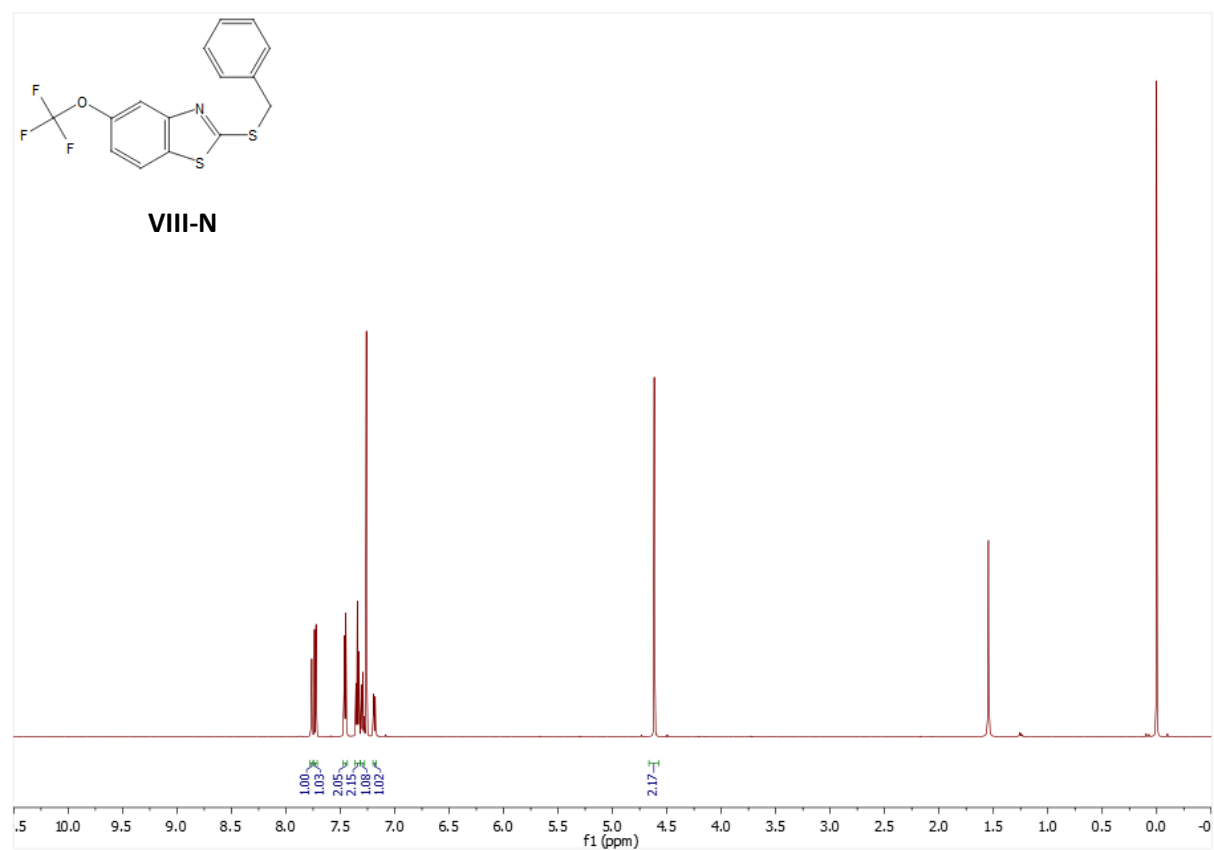

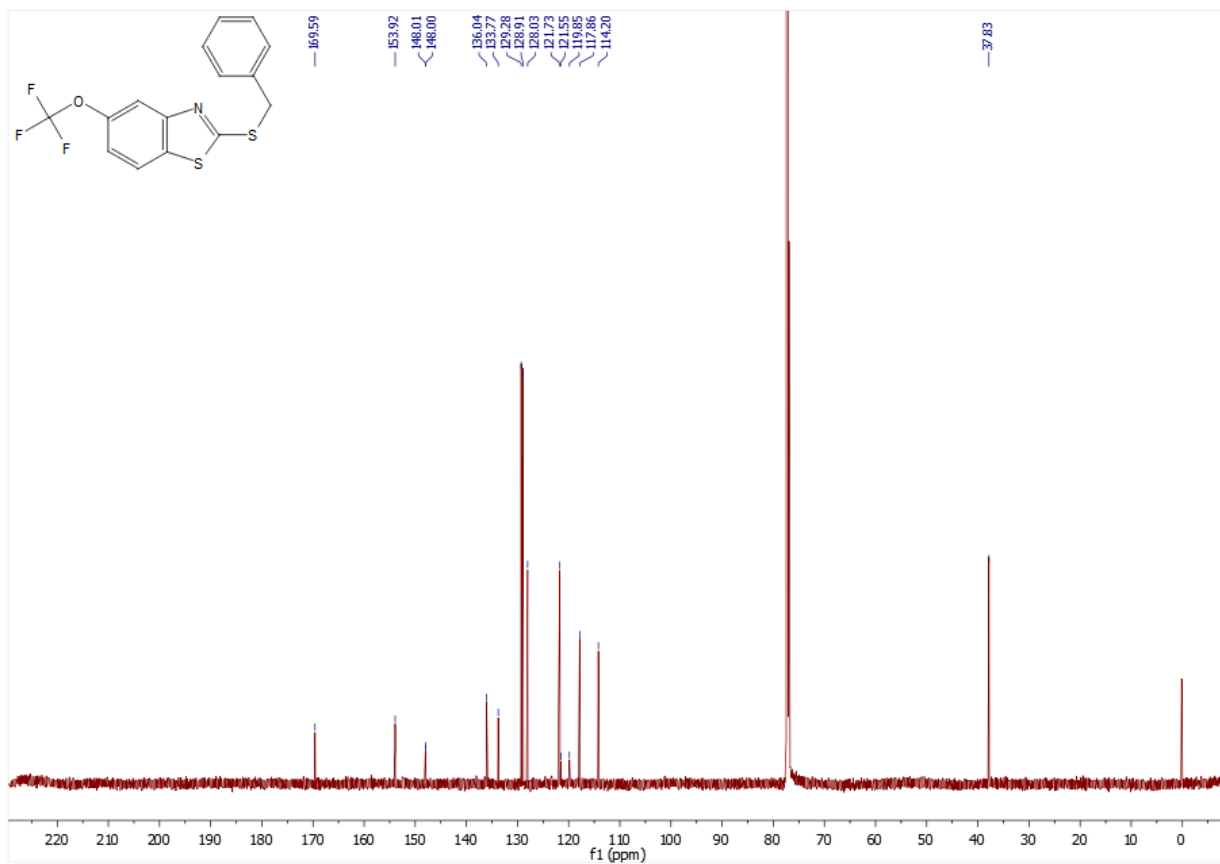

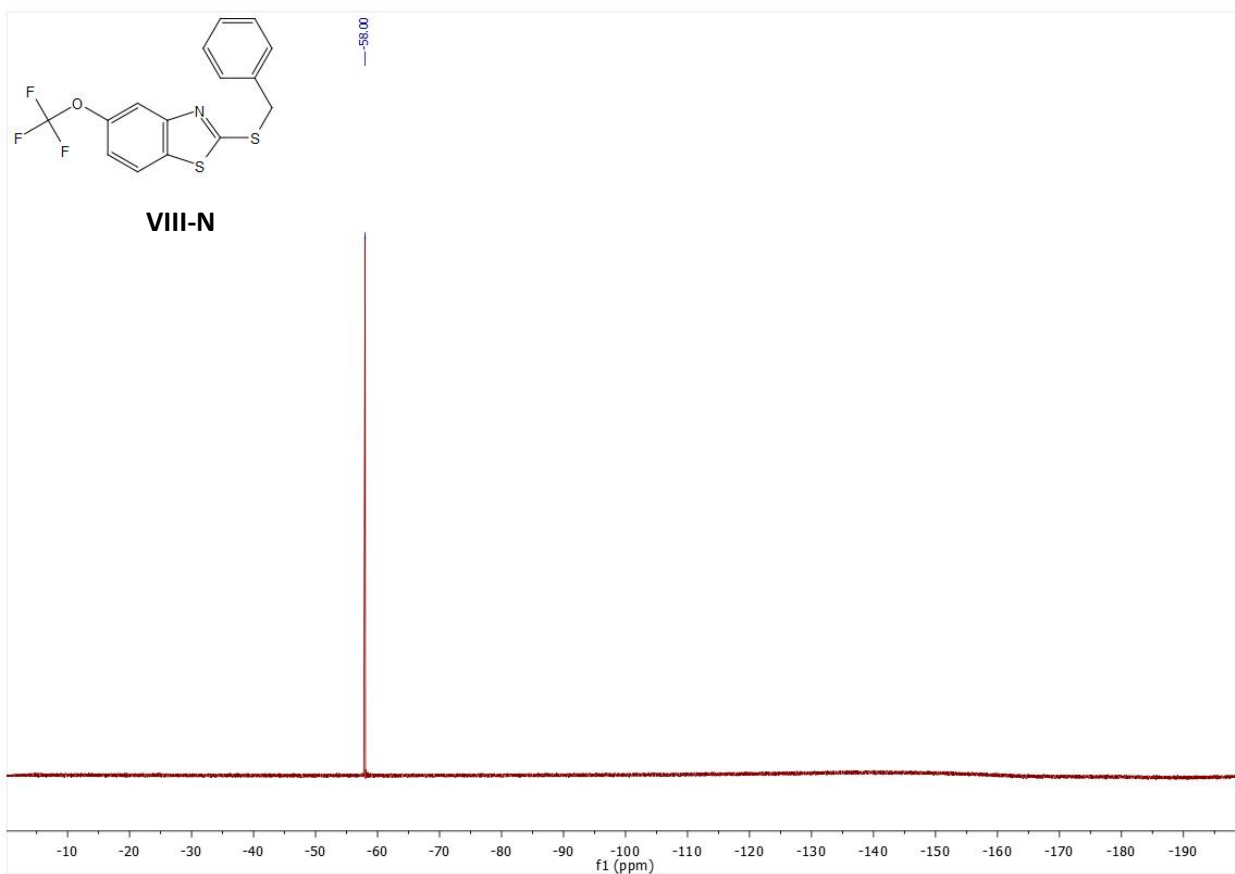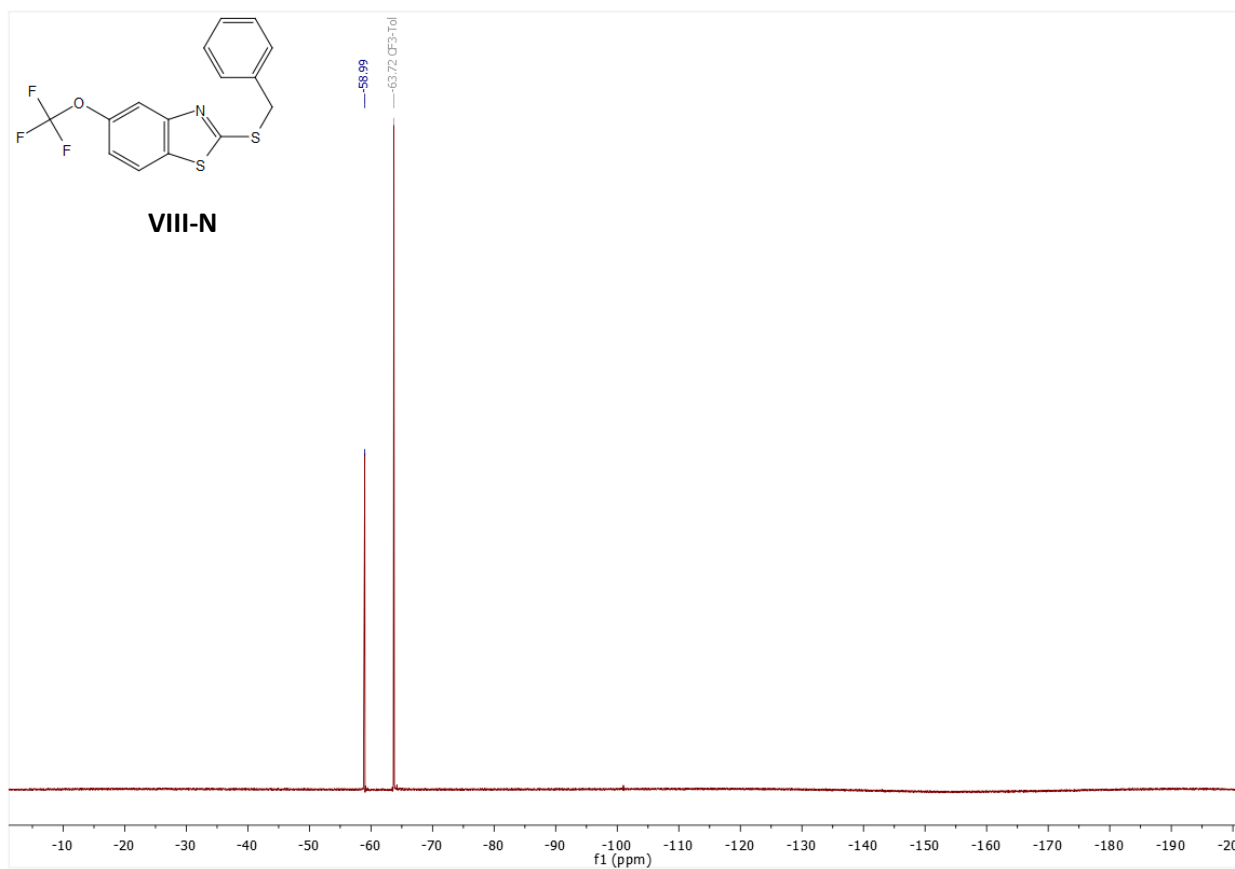

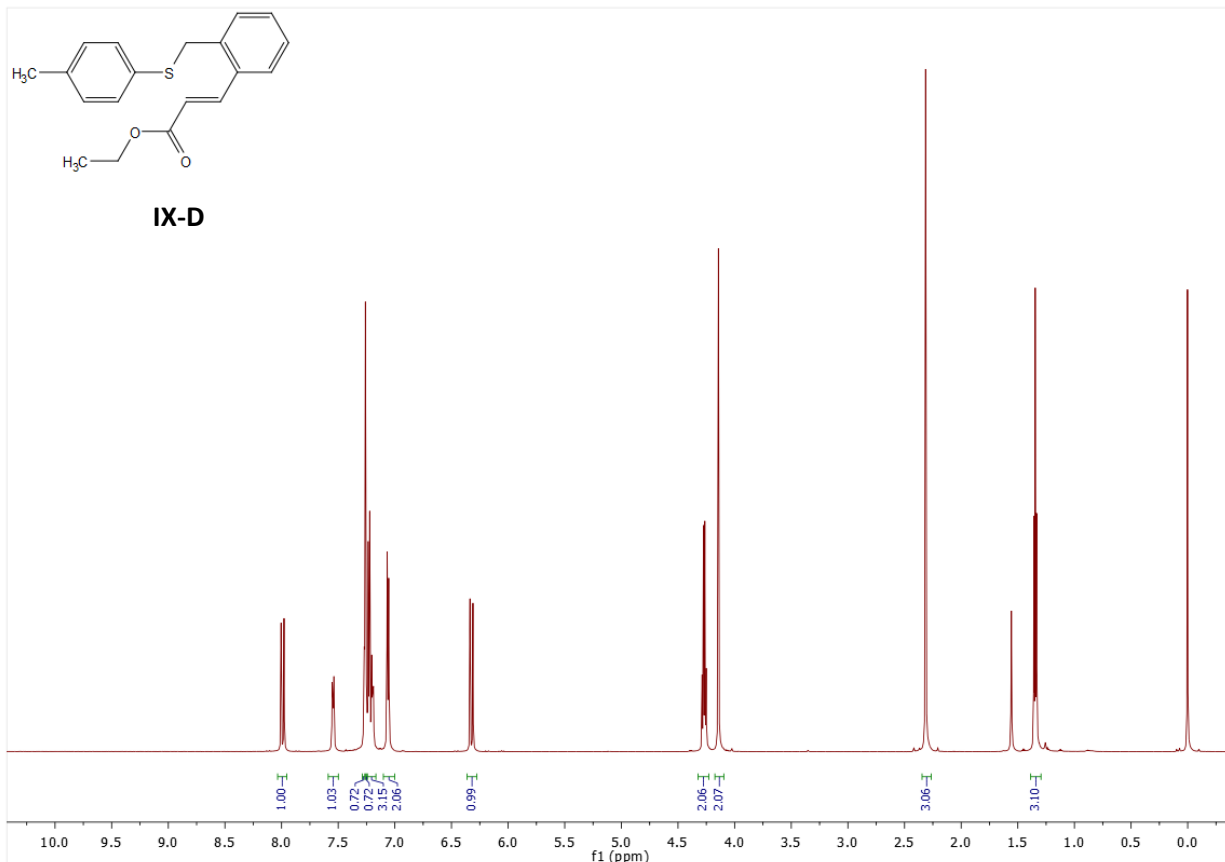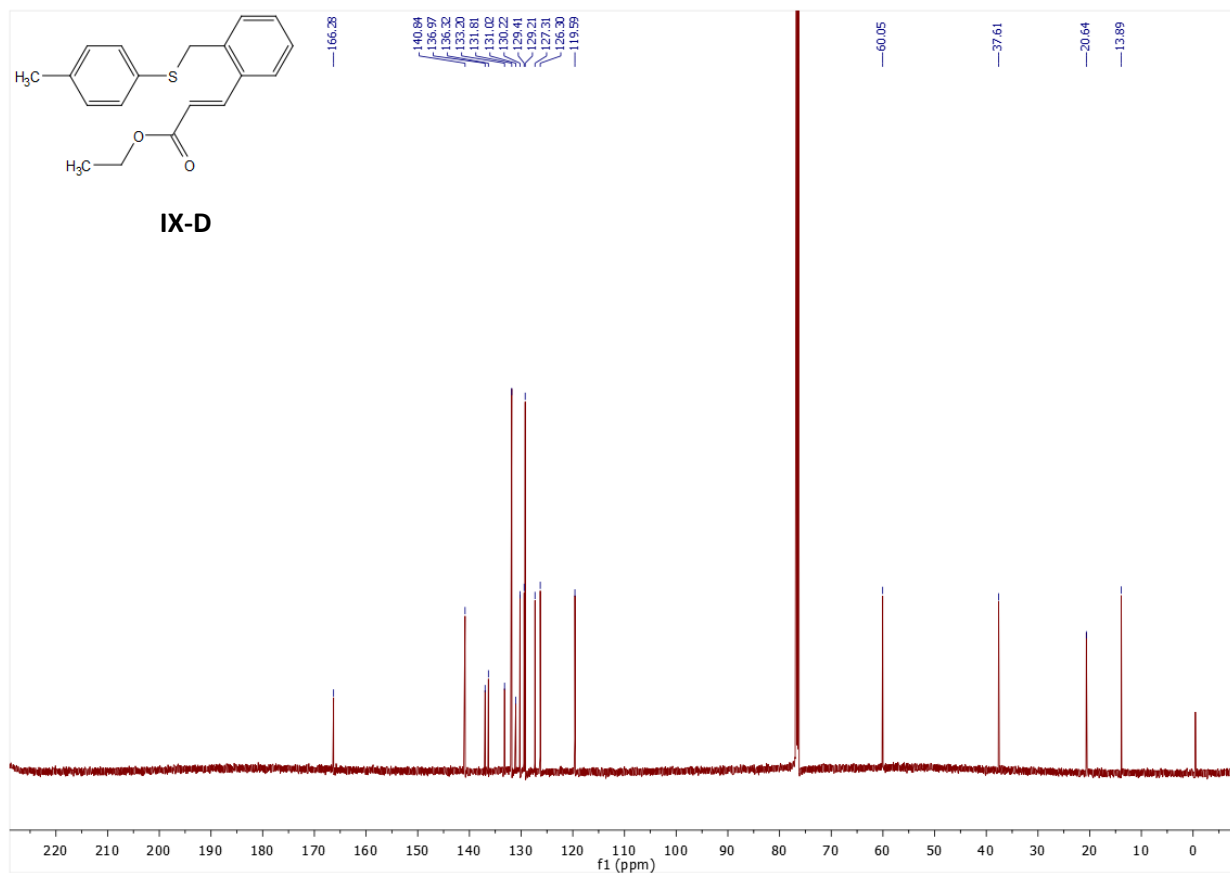

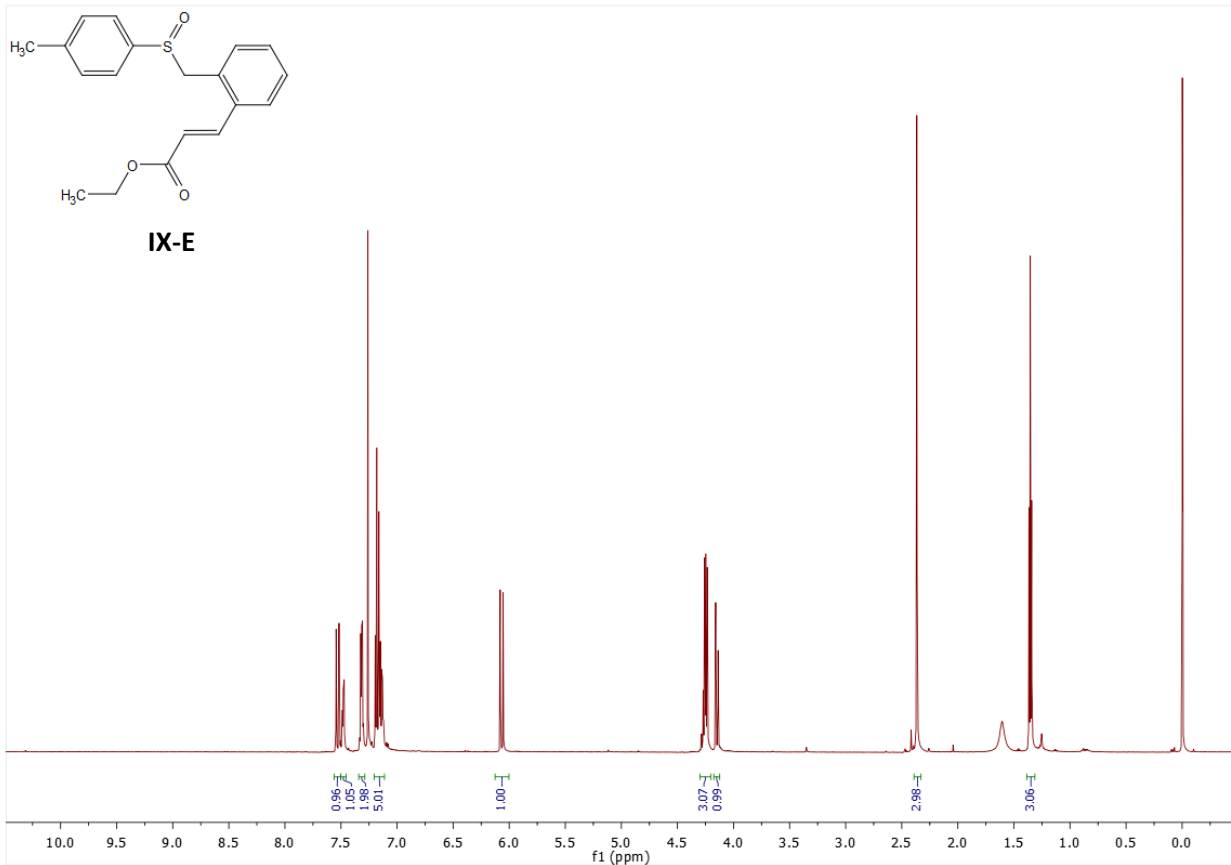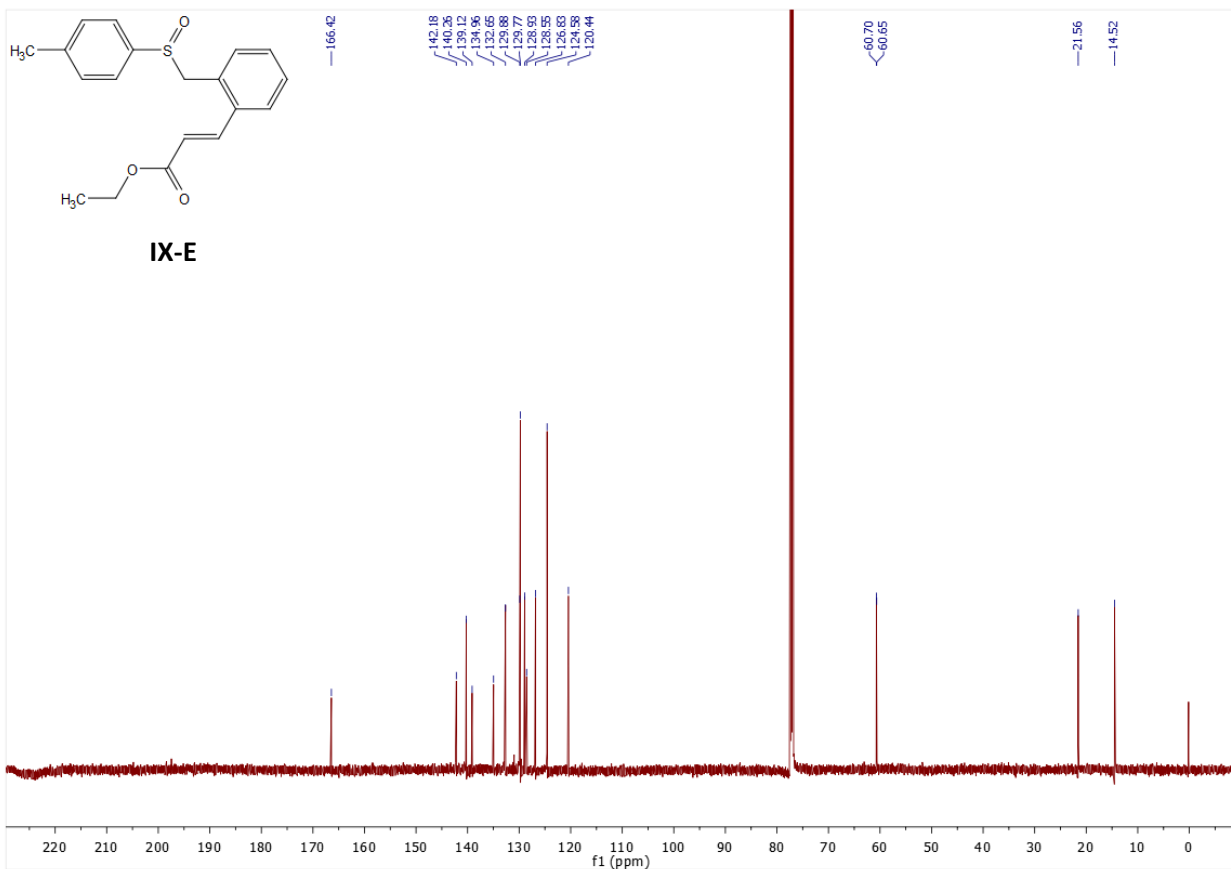

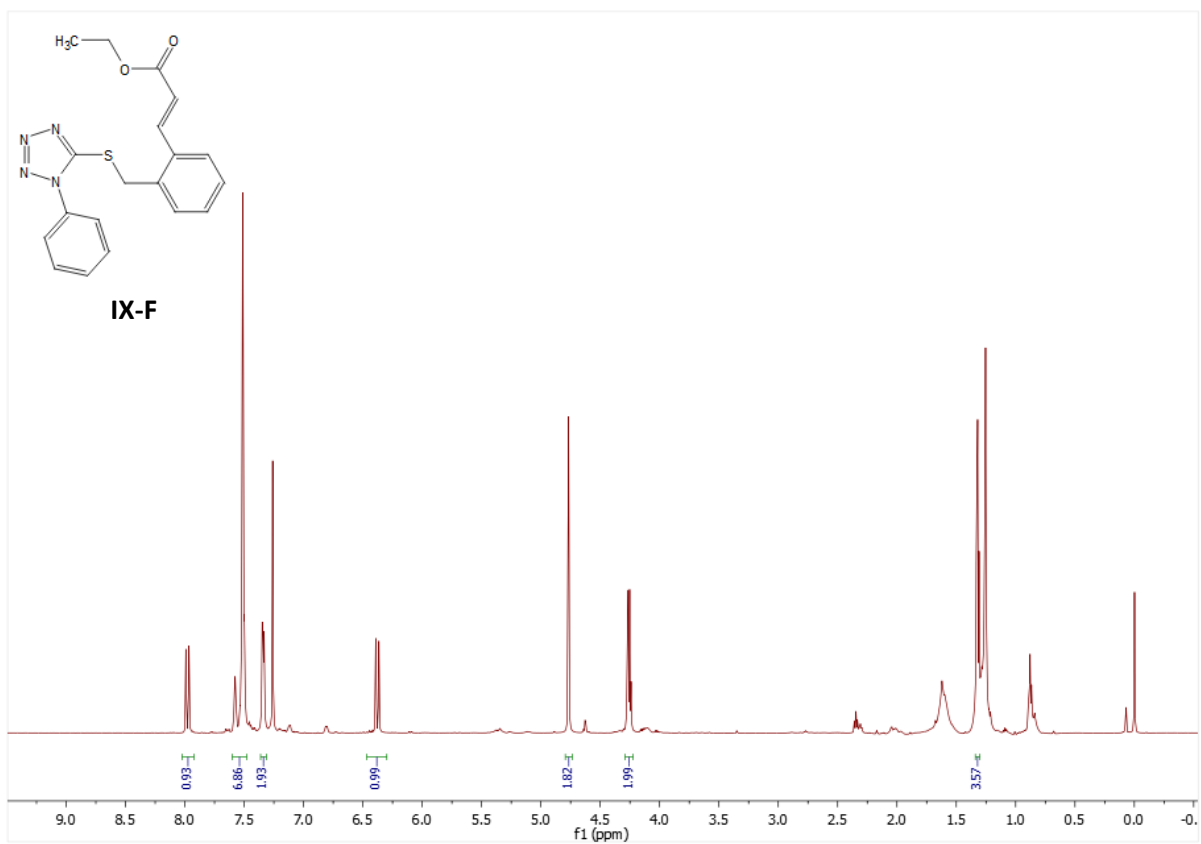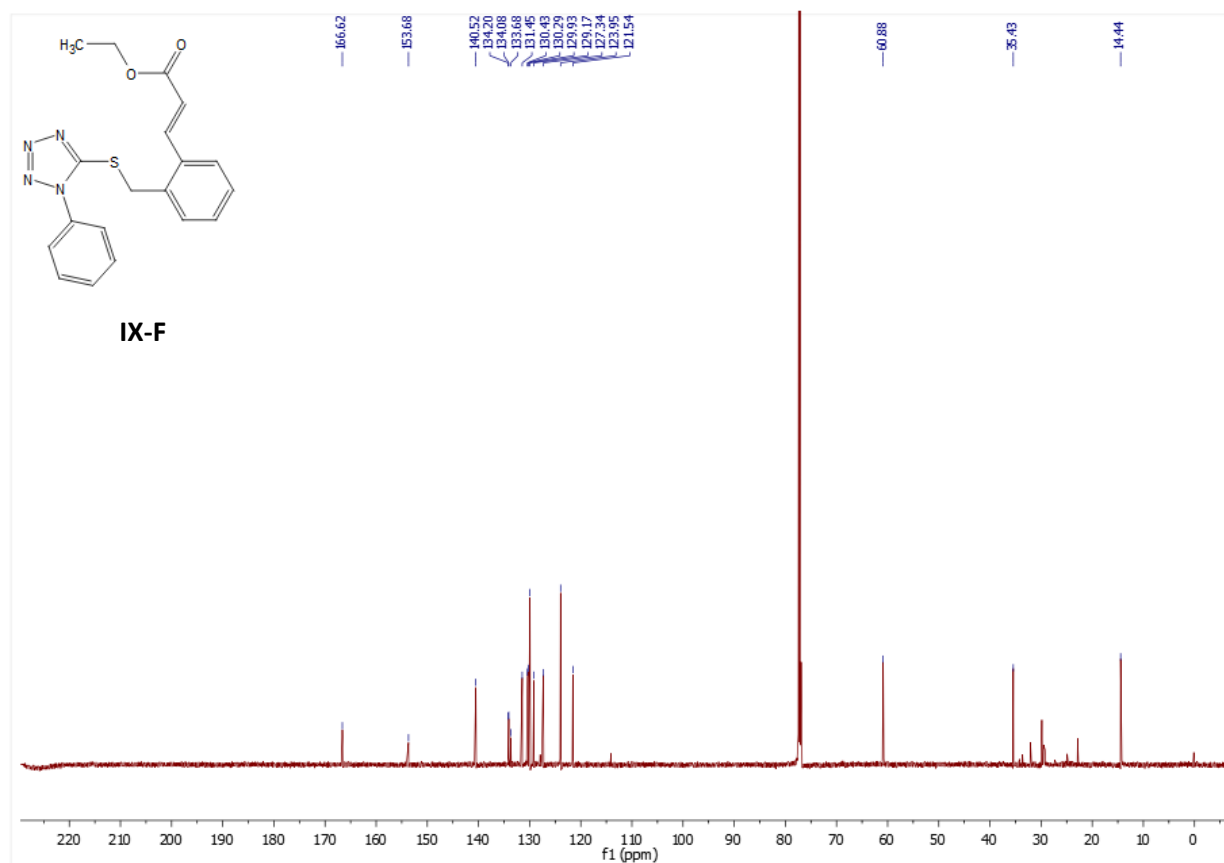

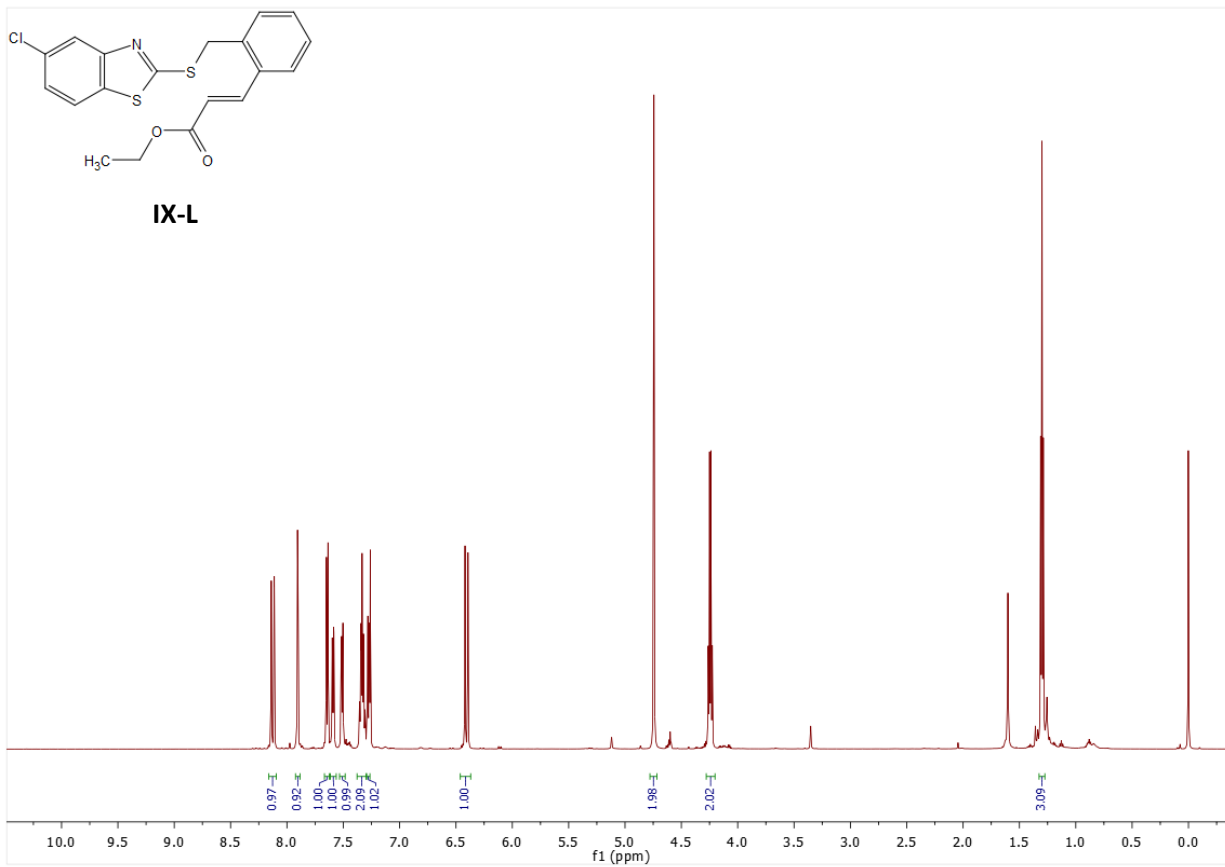

**IX-L**

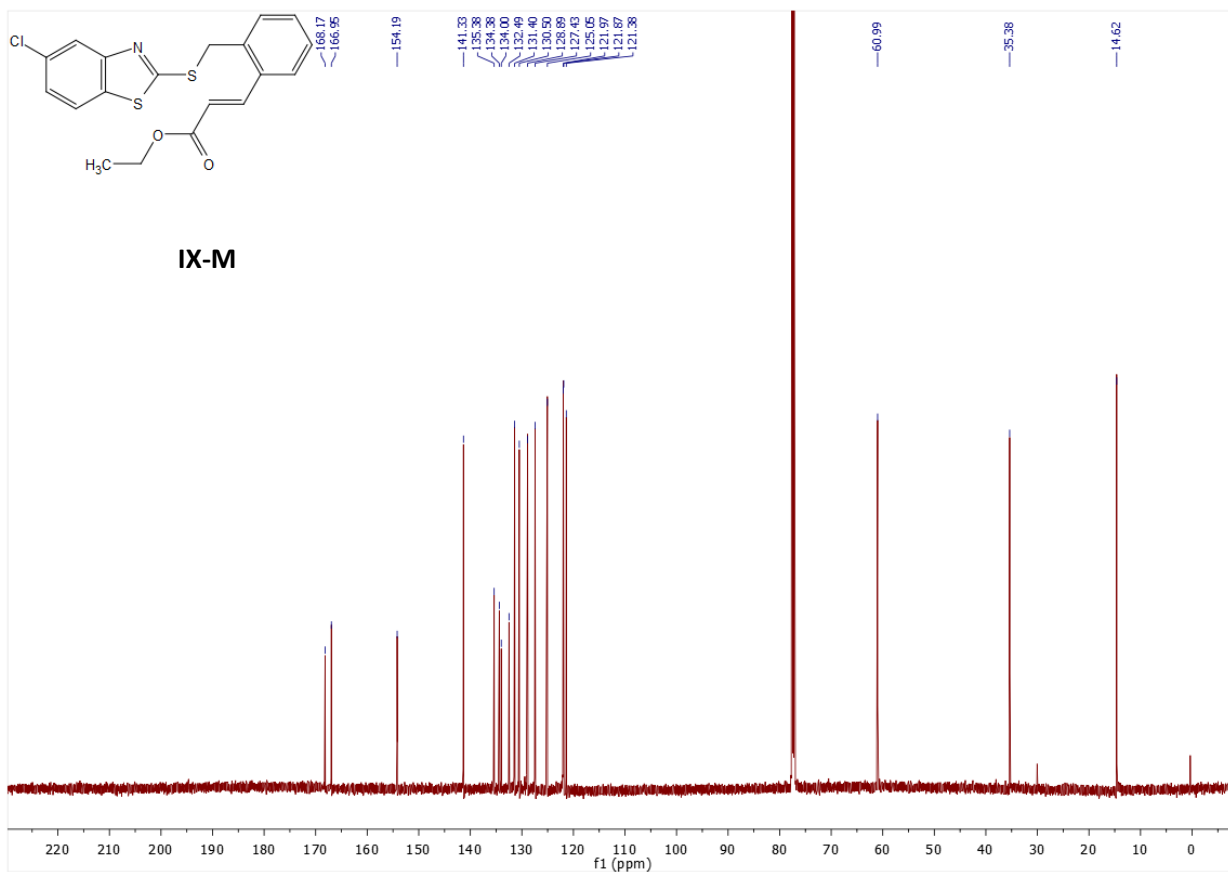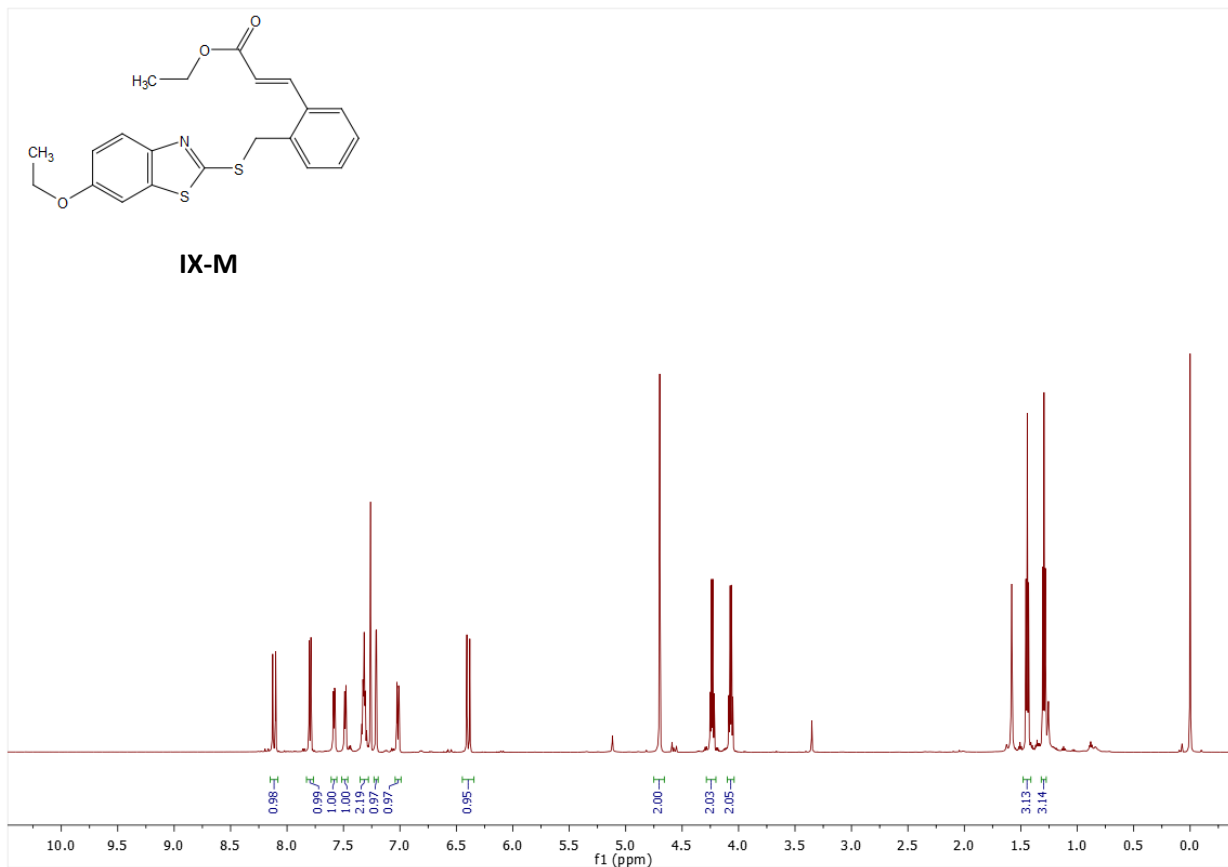



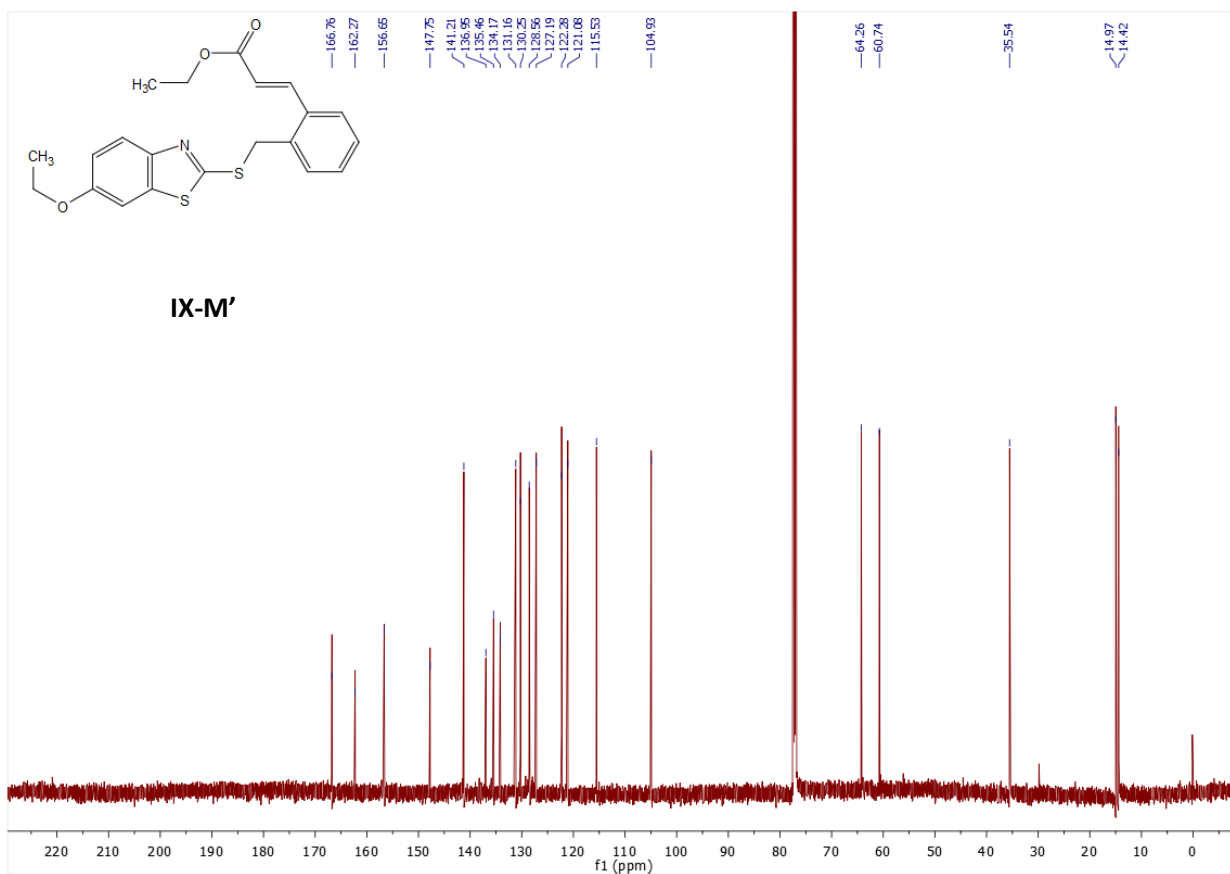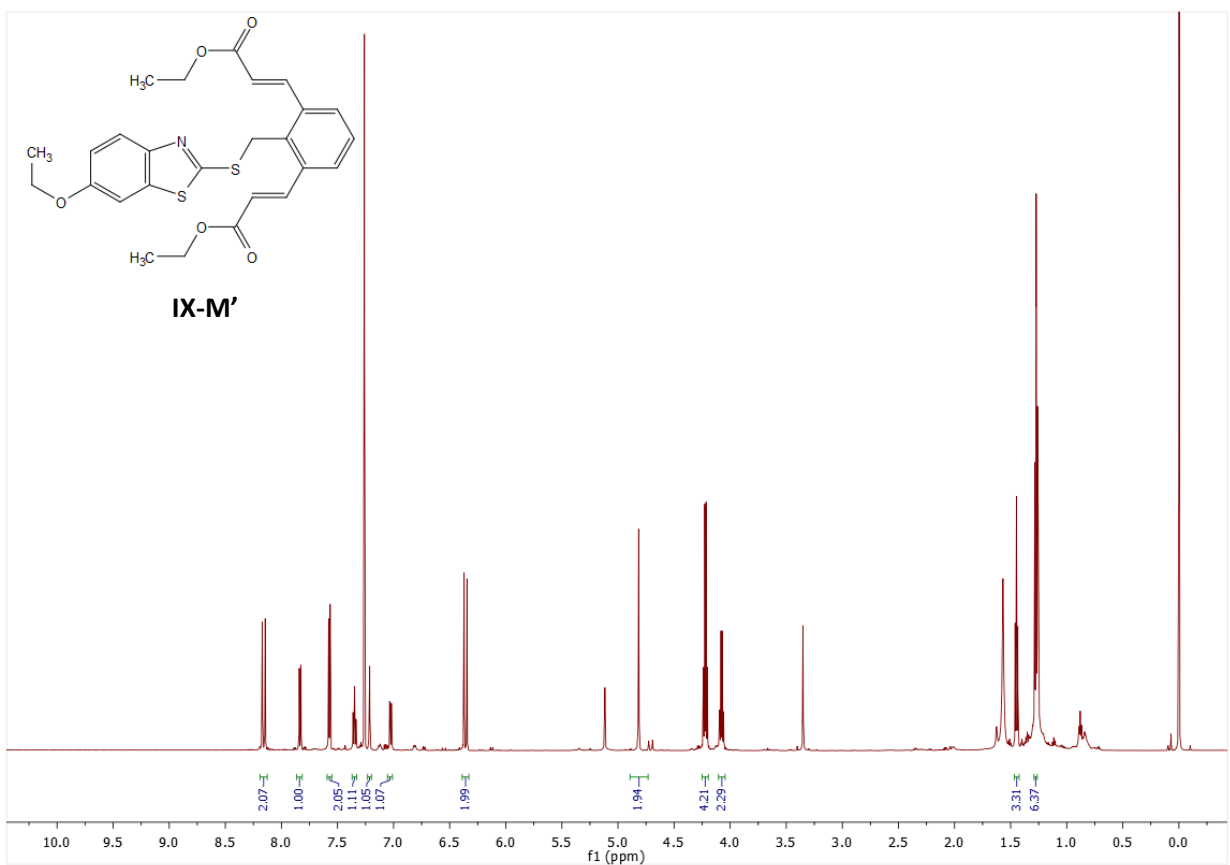

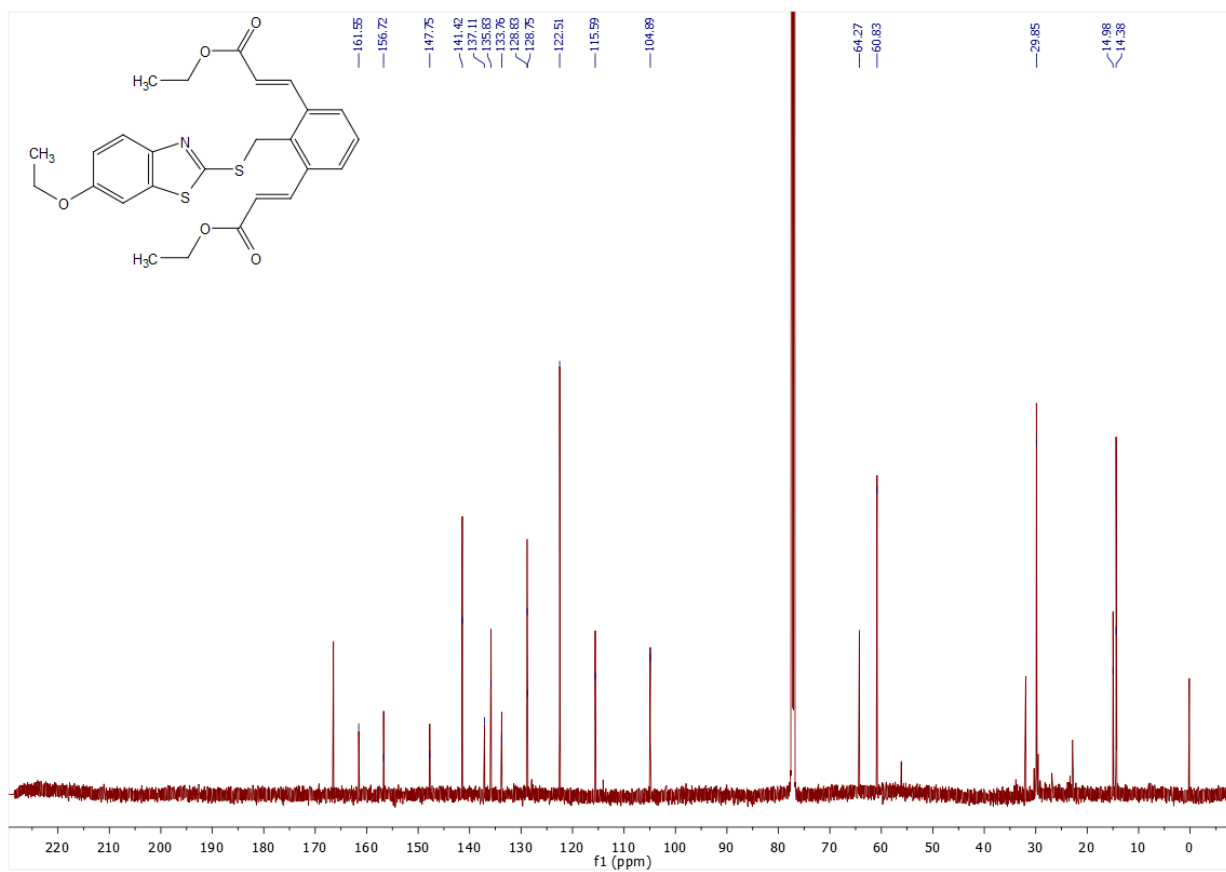

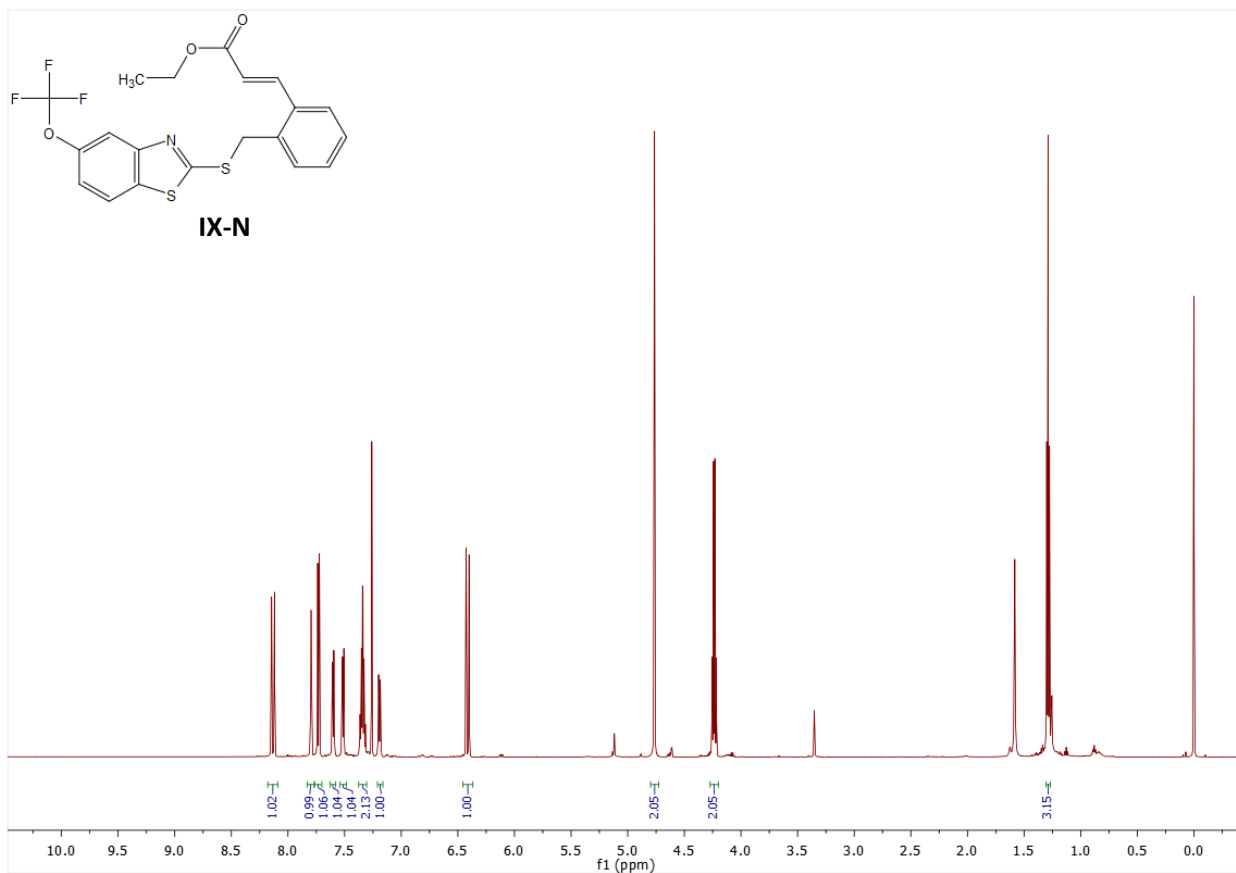

**IX-N**

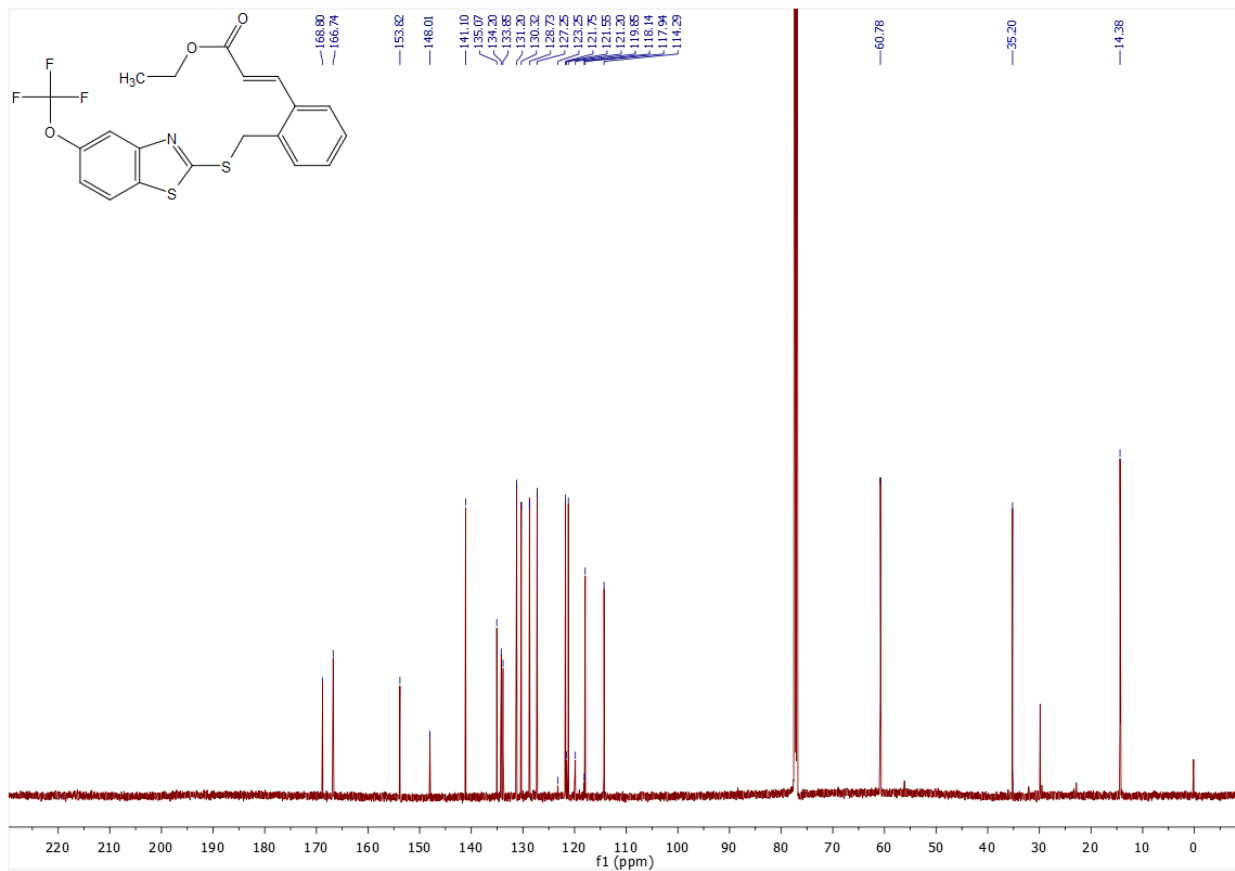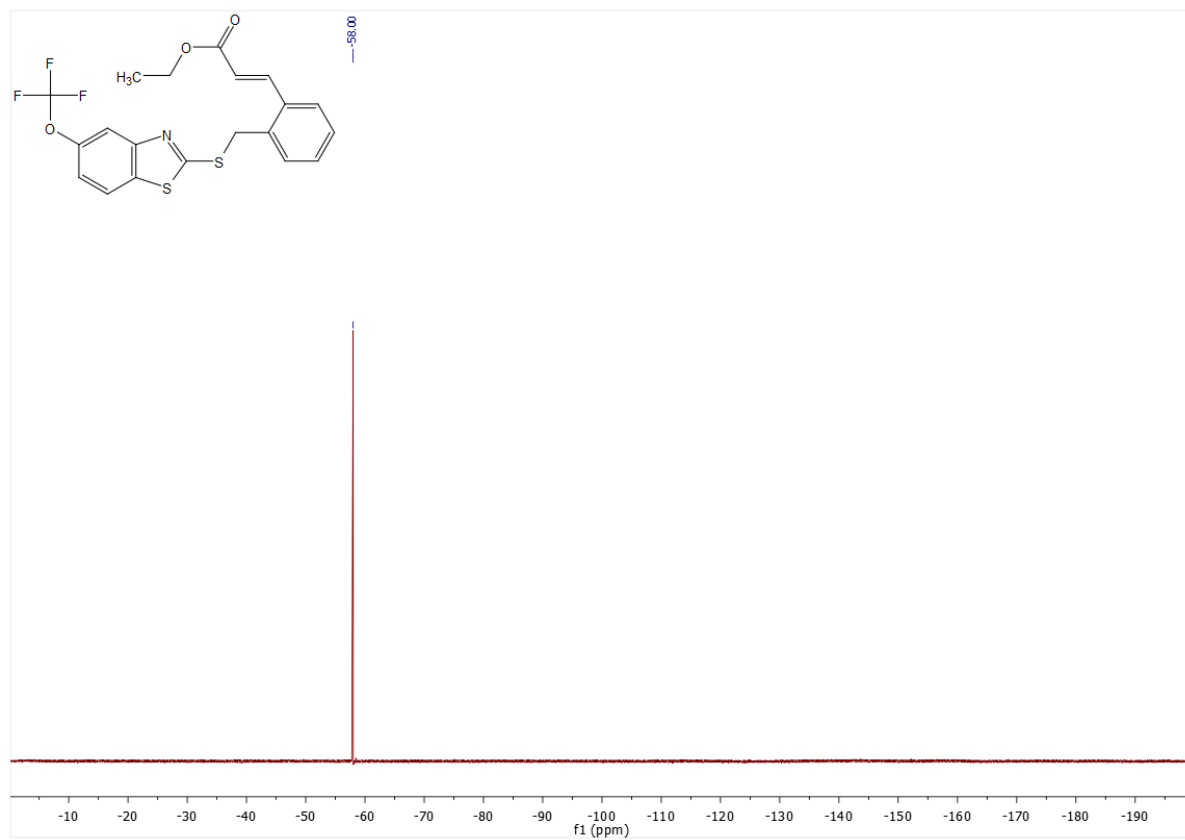

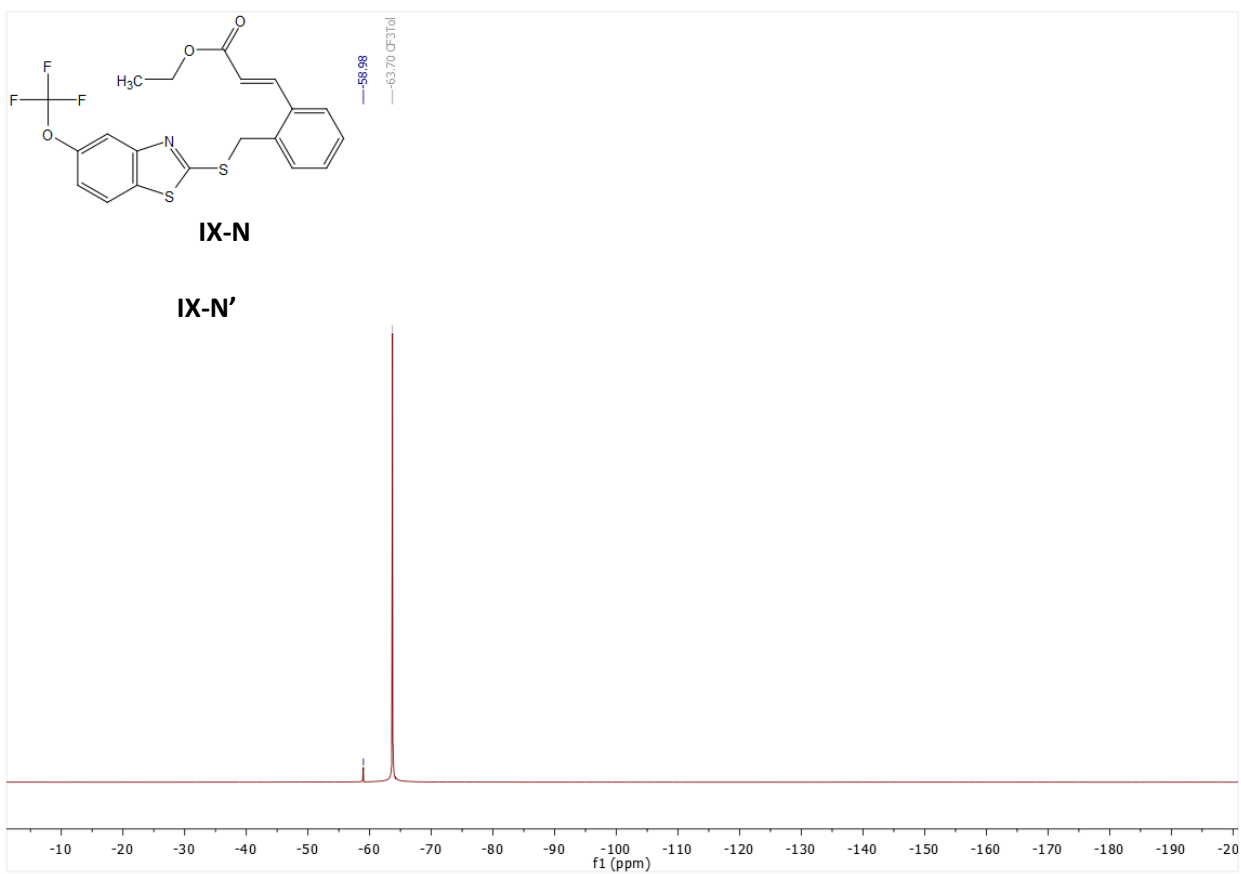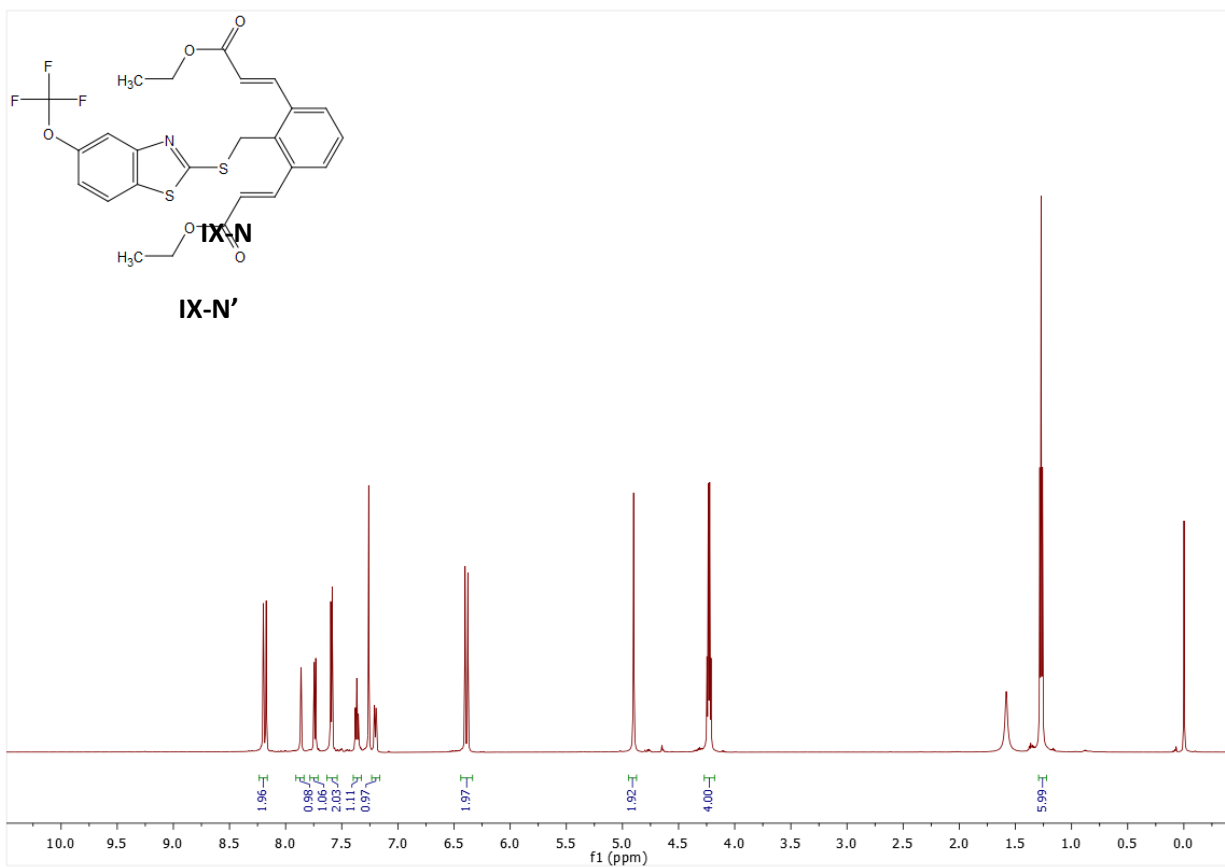

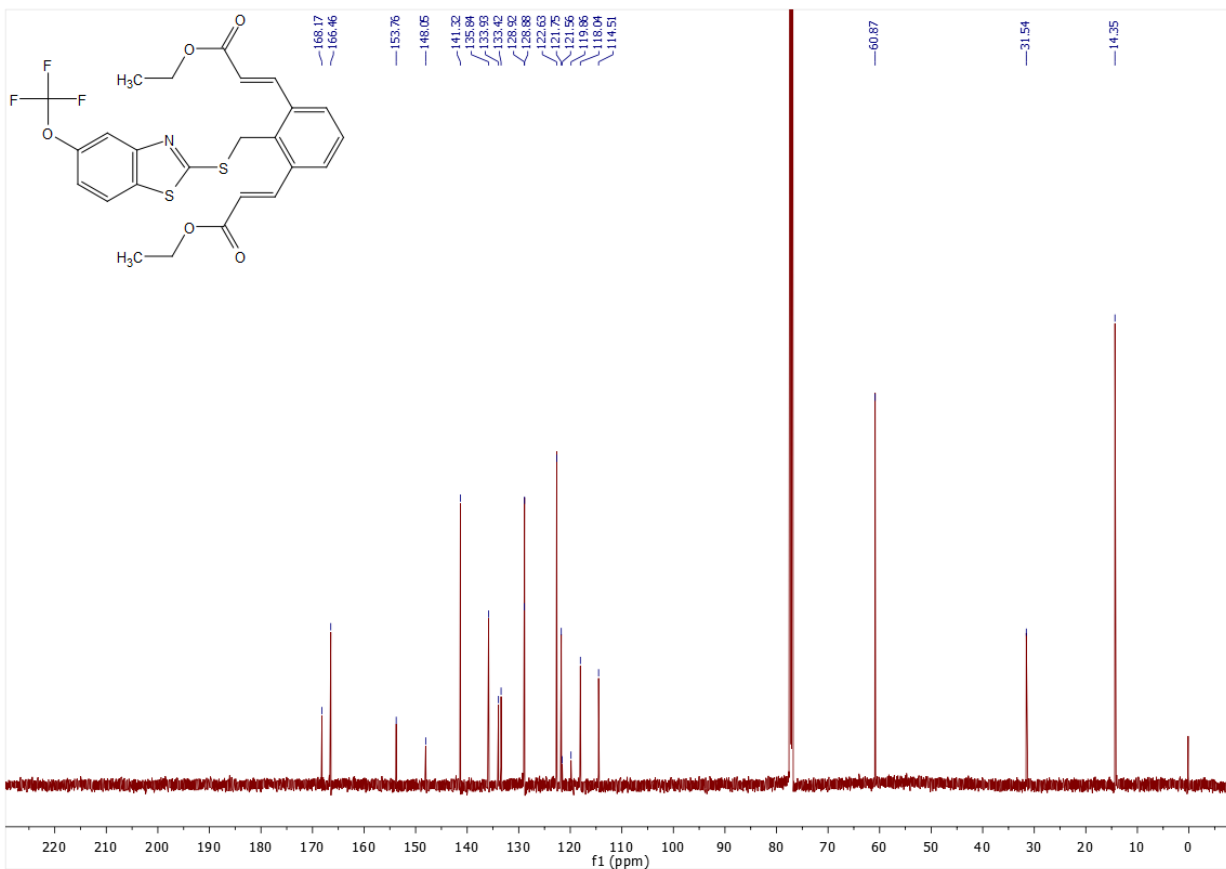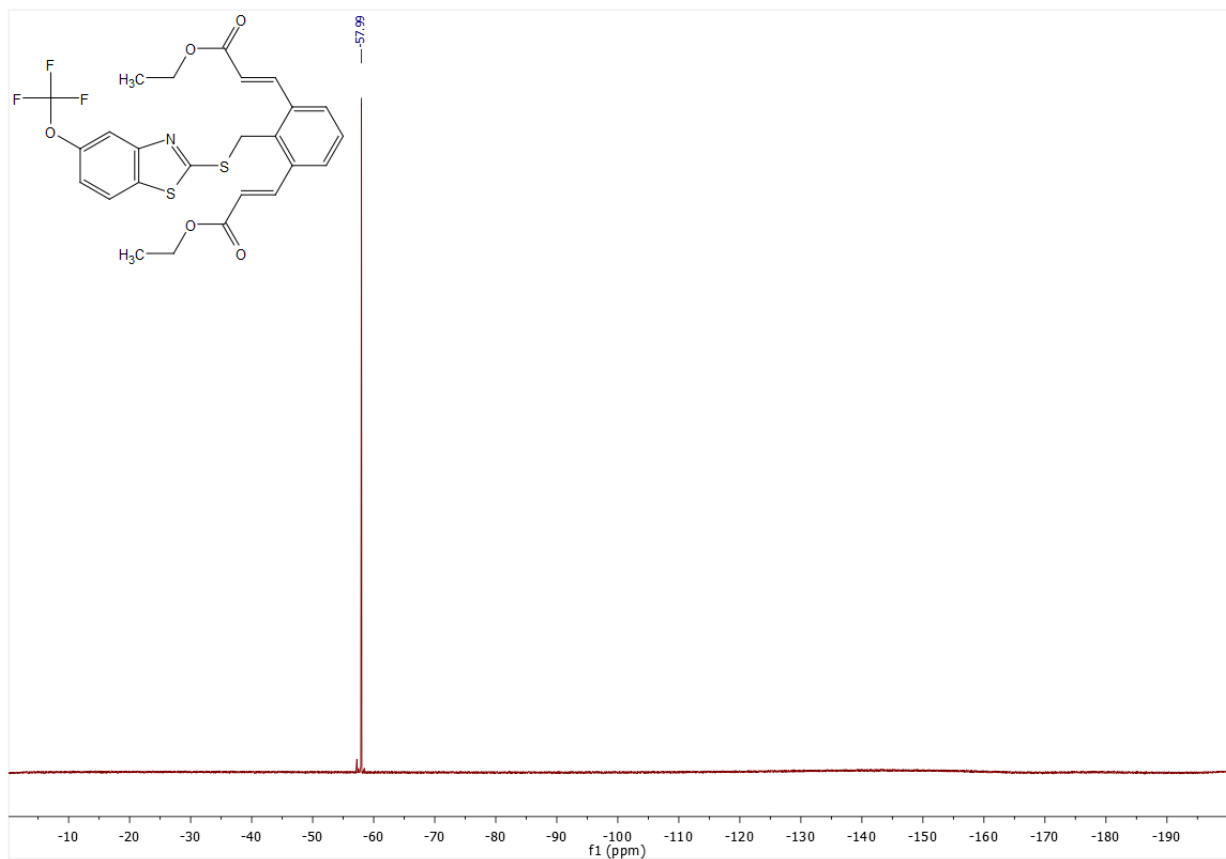

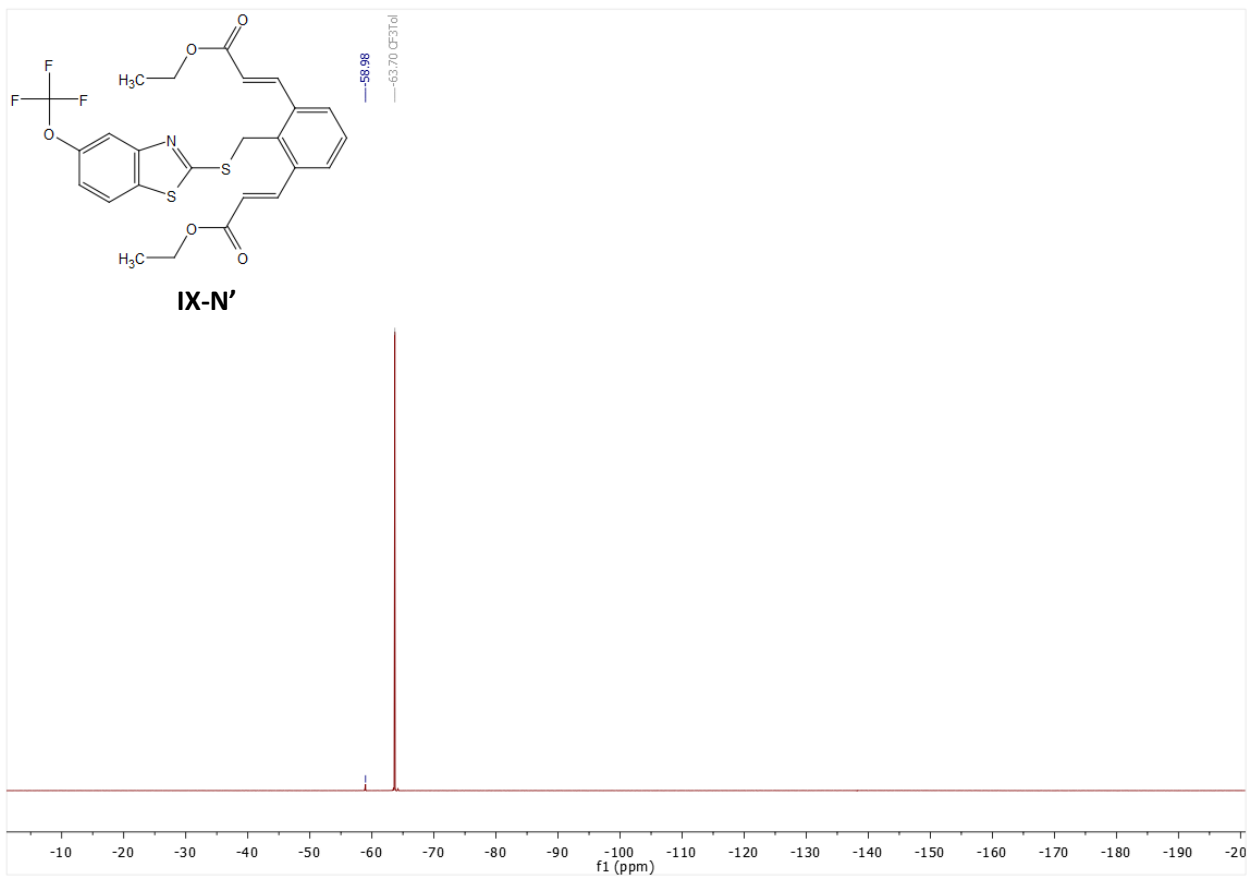

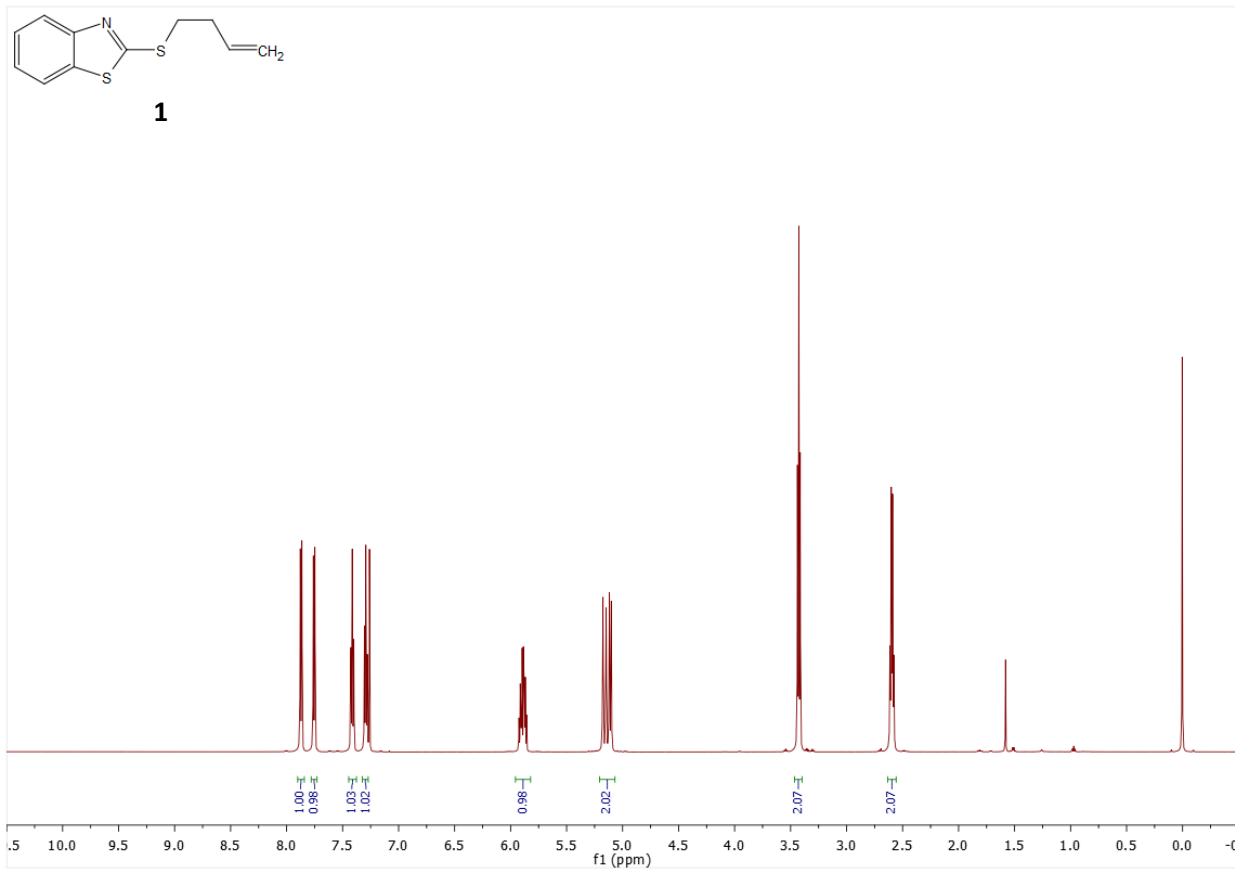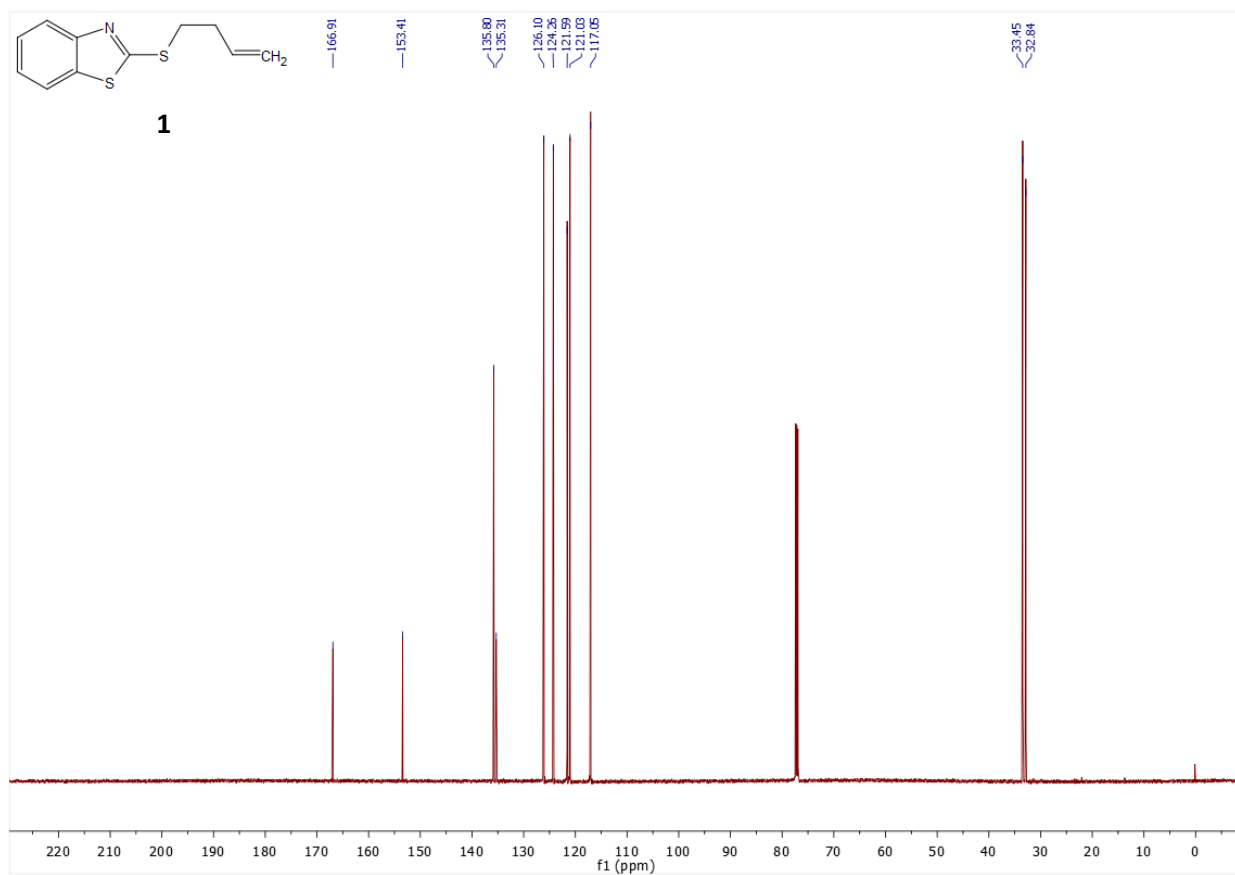



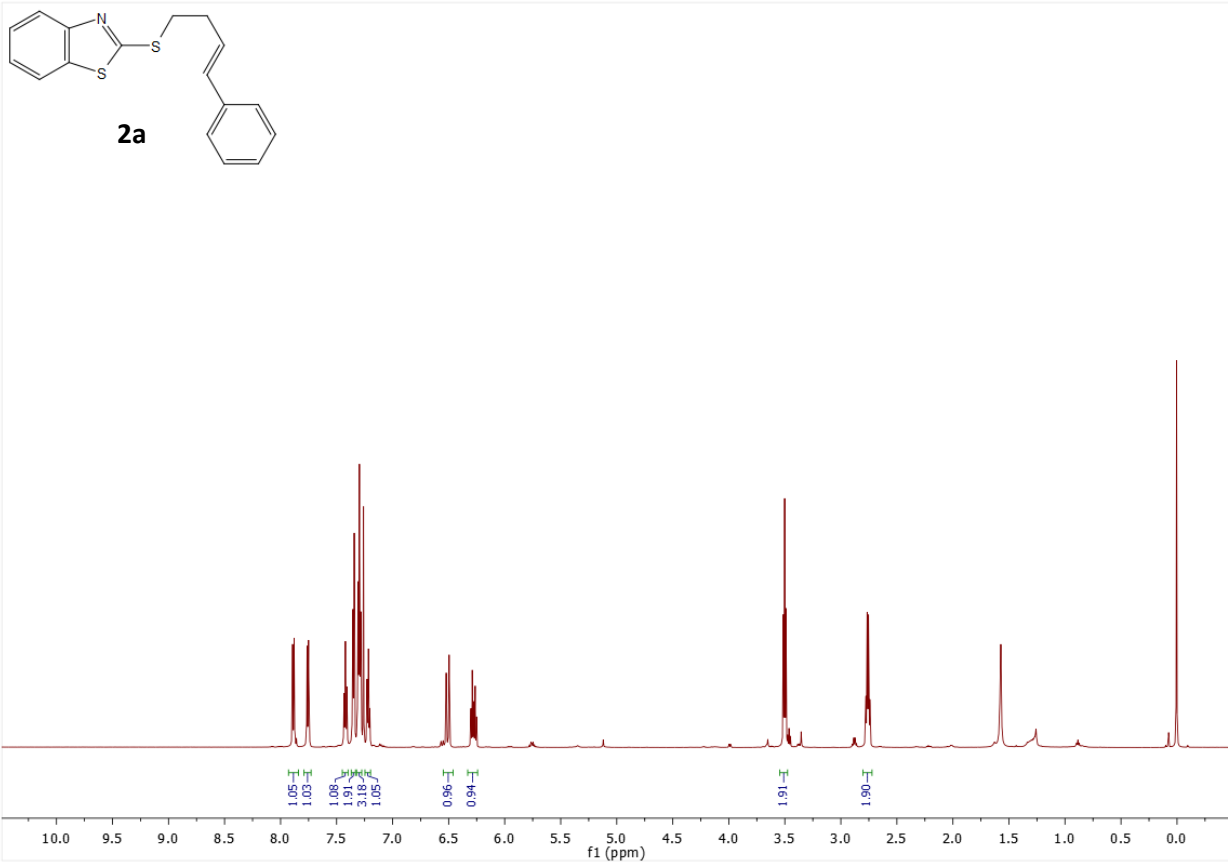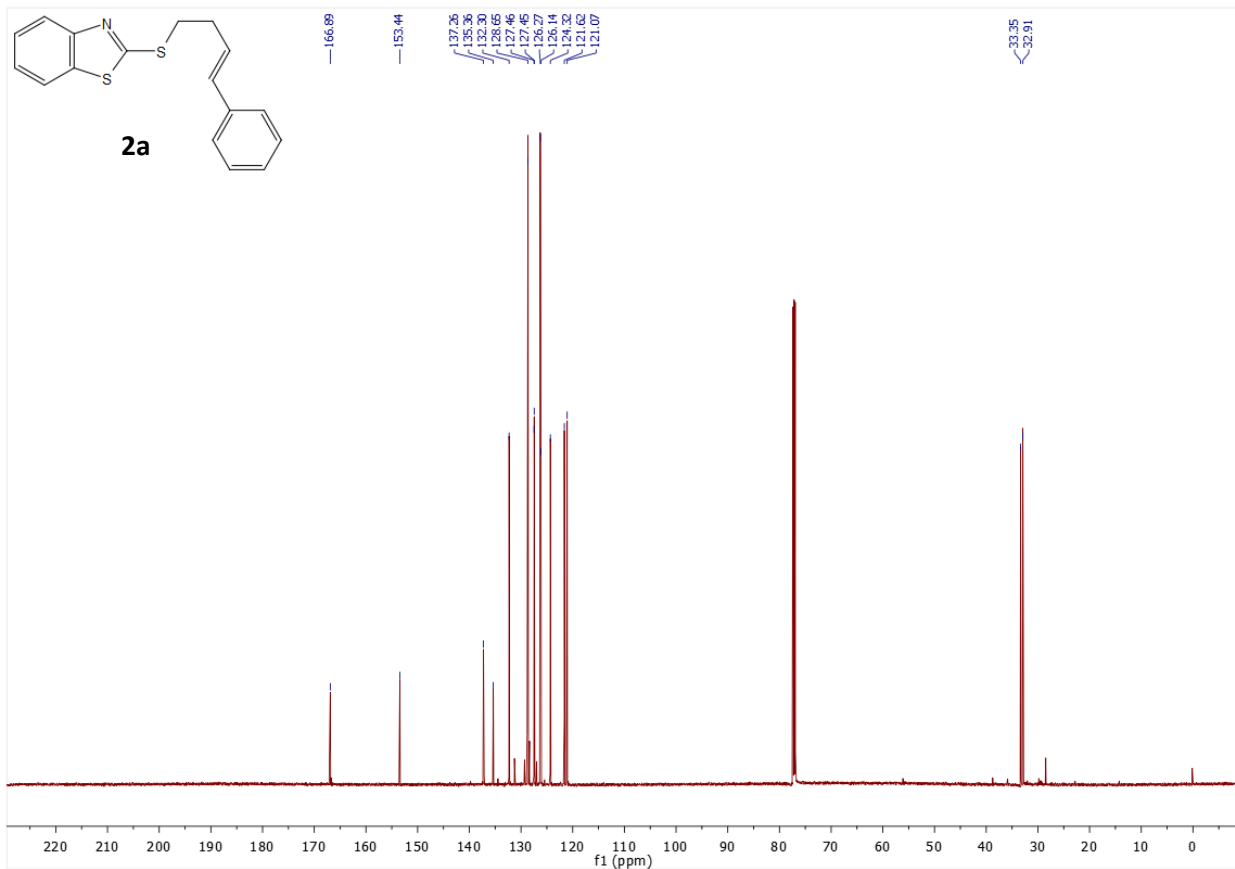

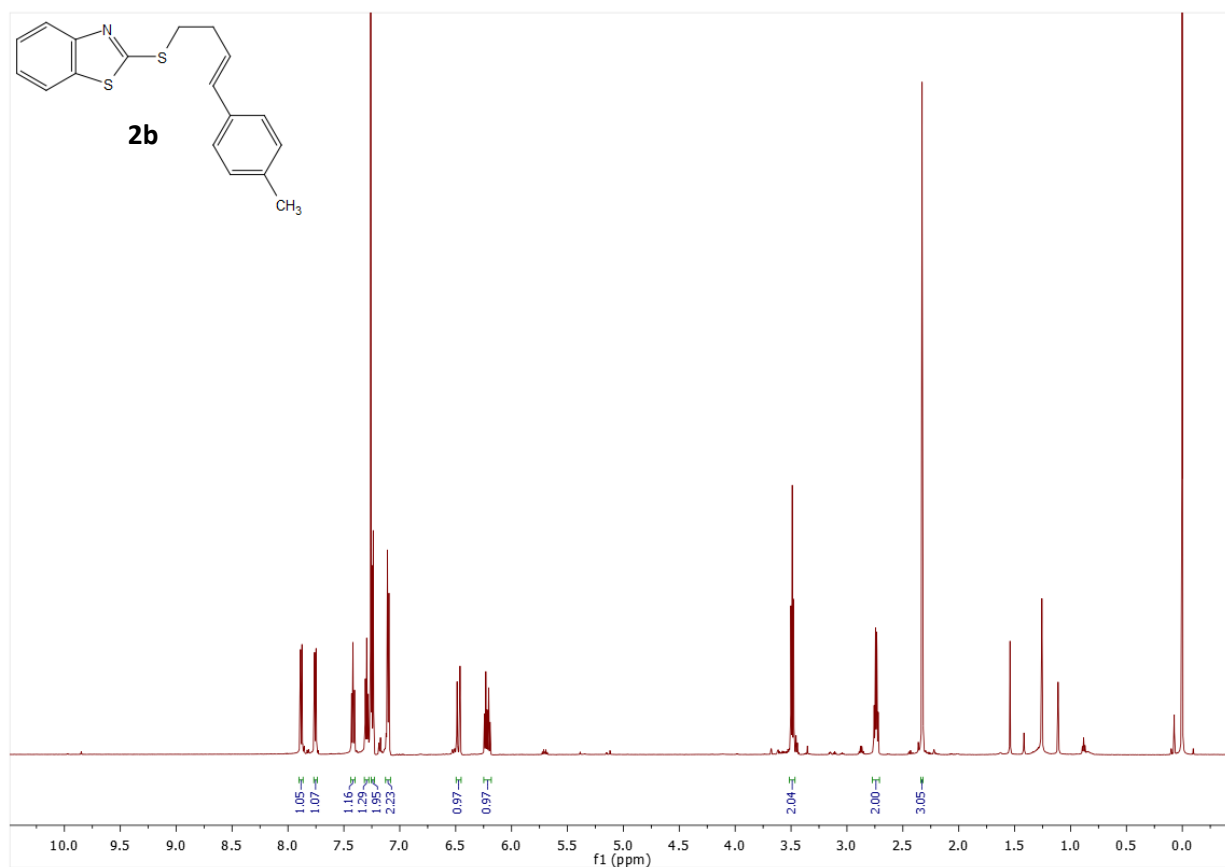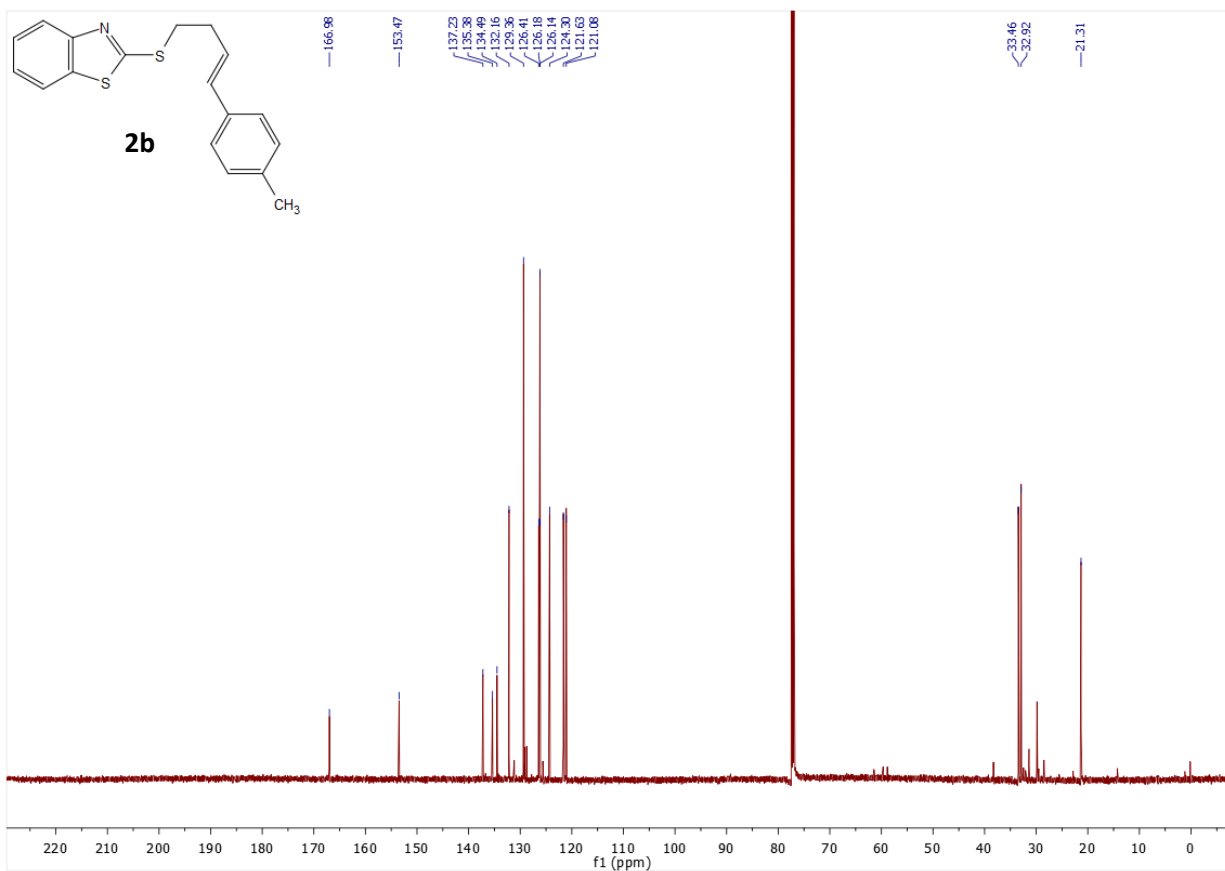

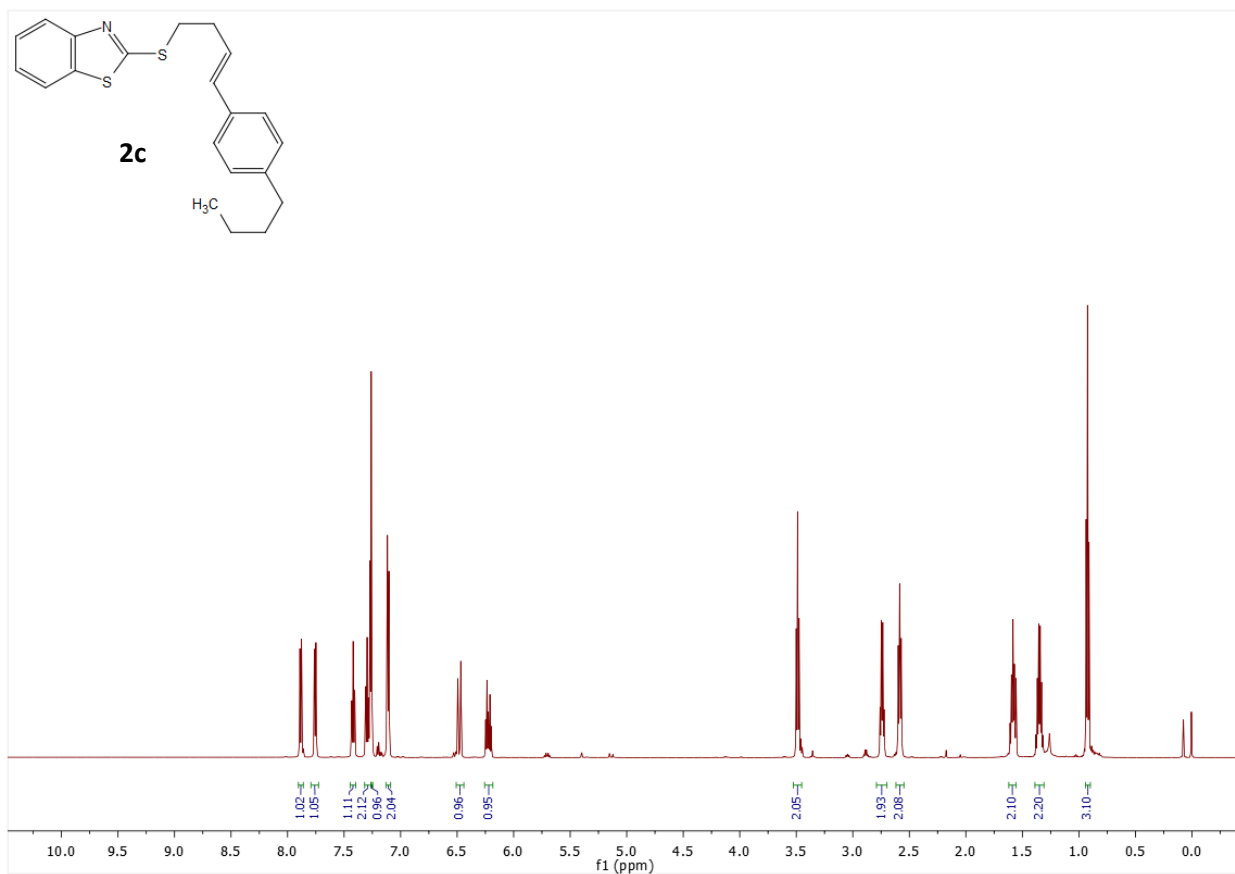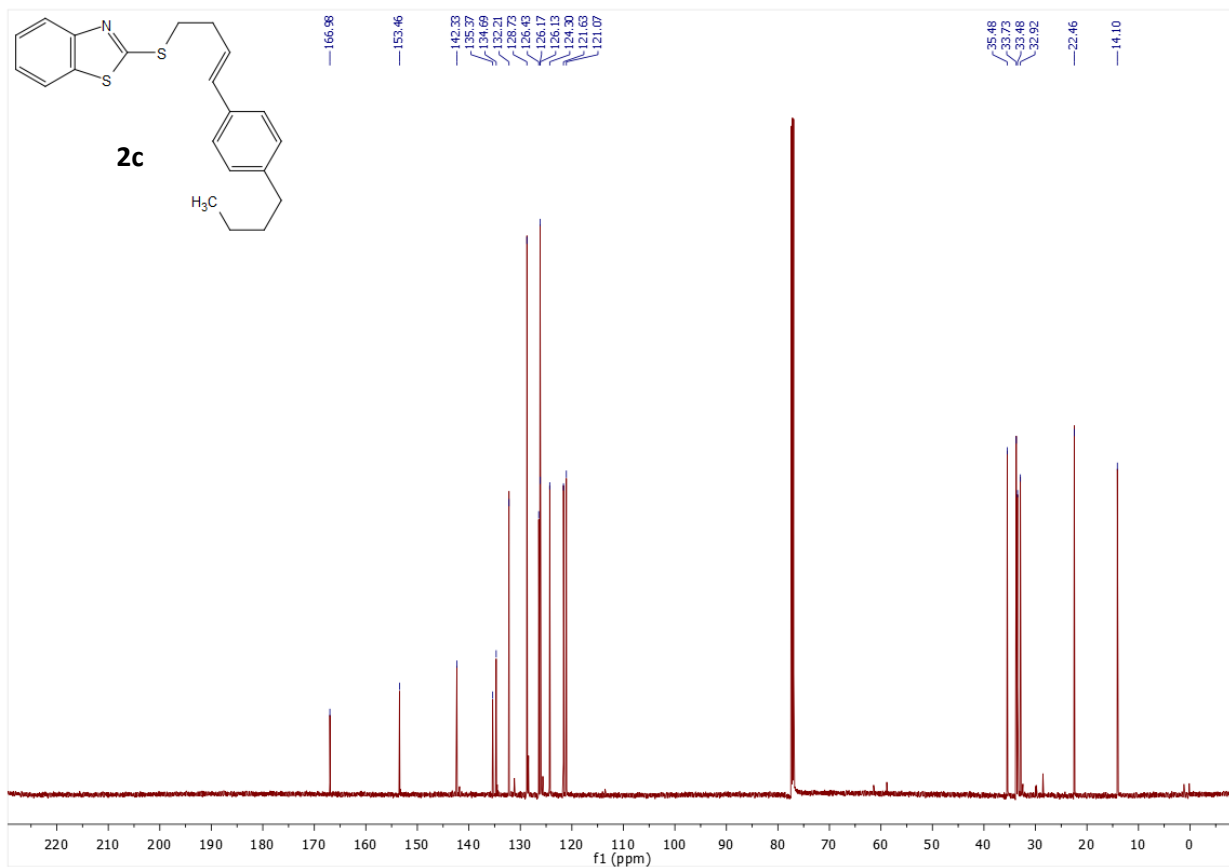

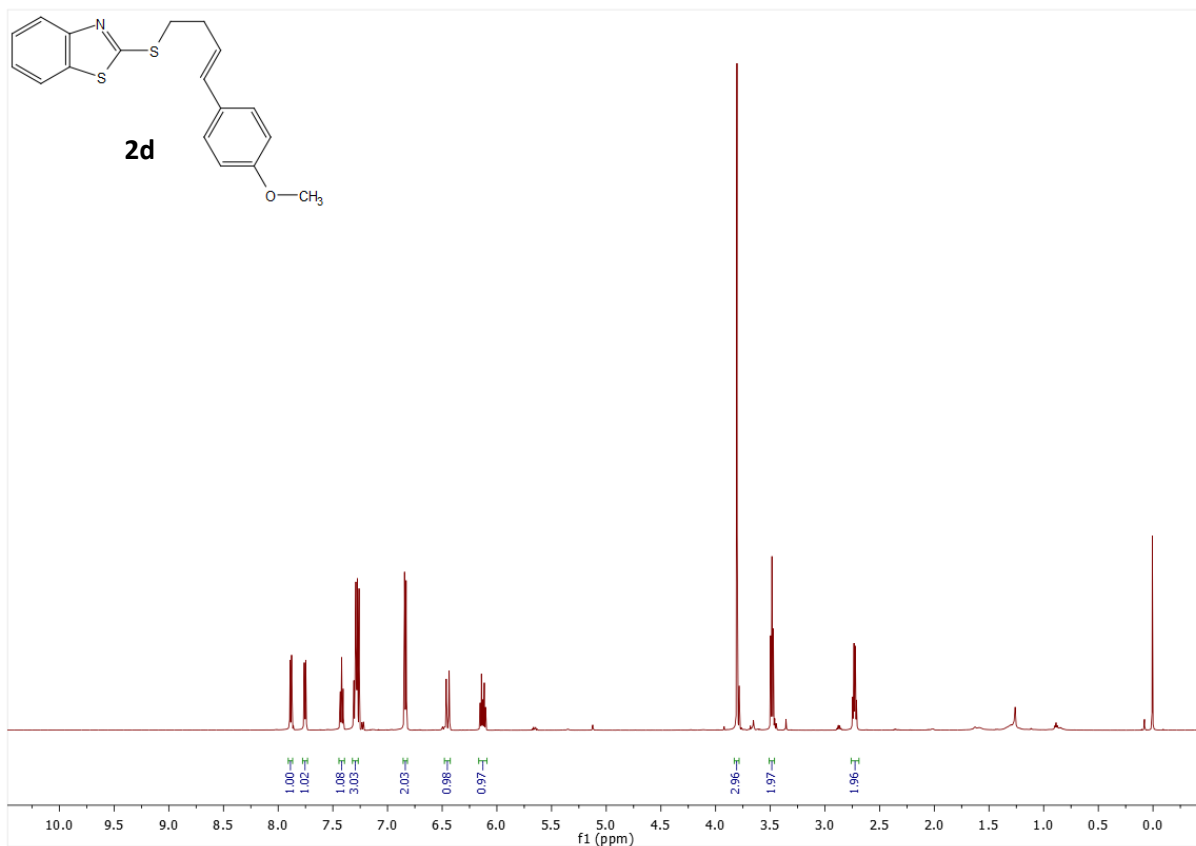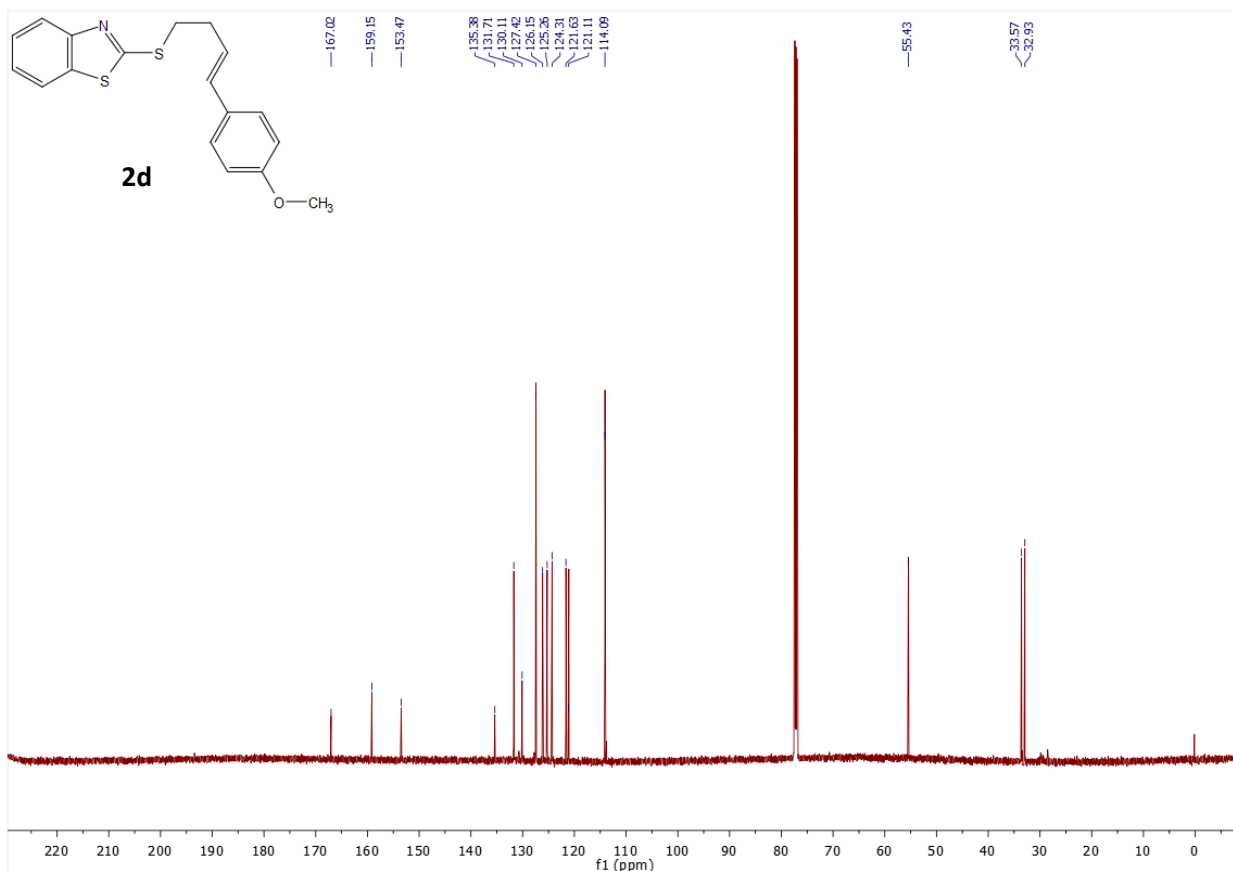

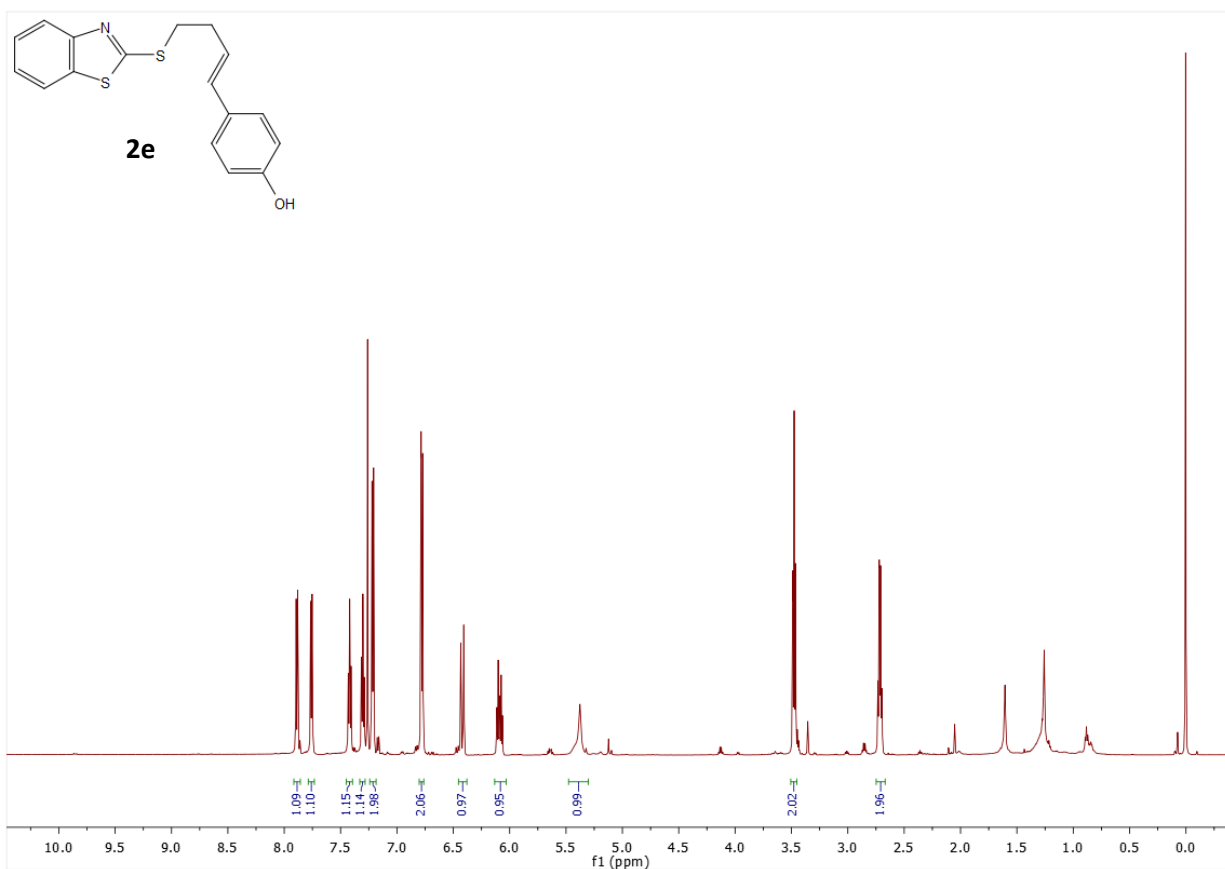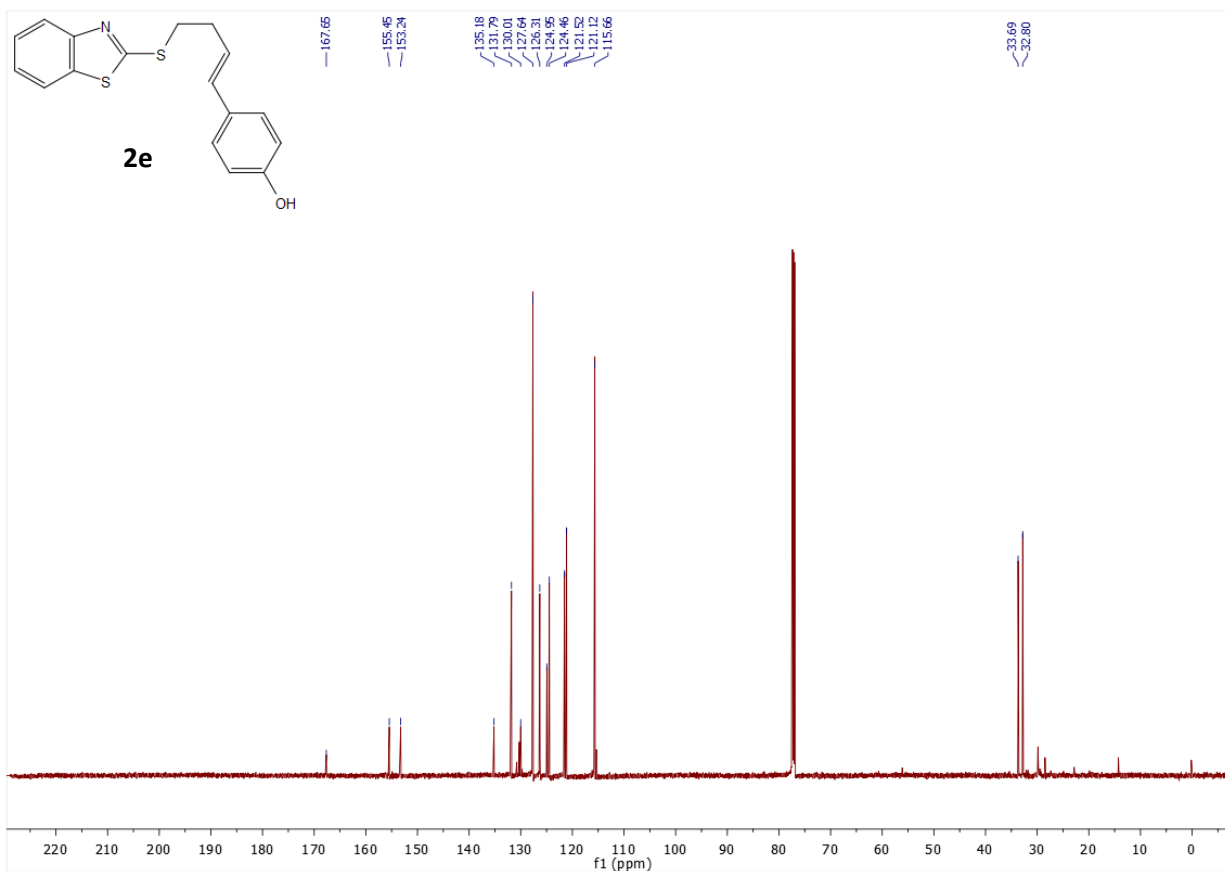

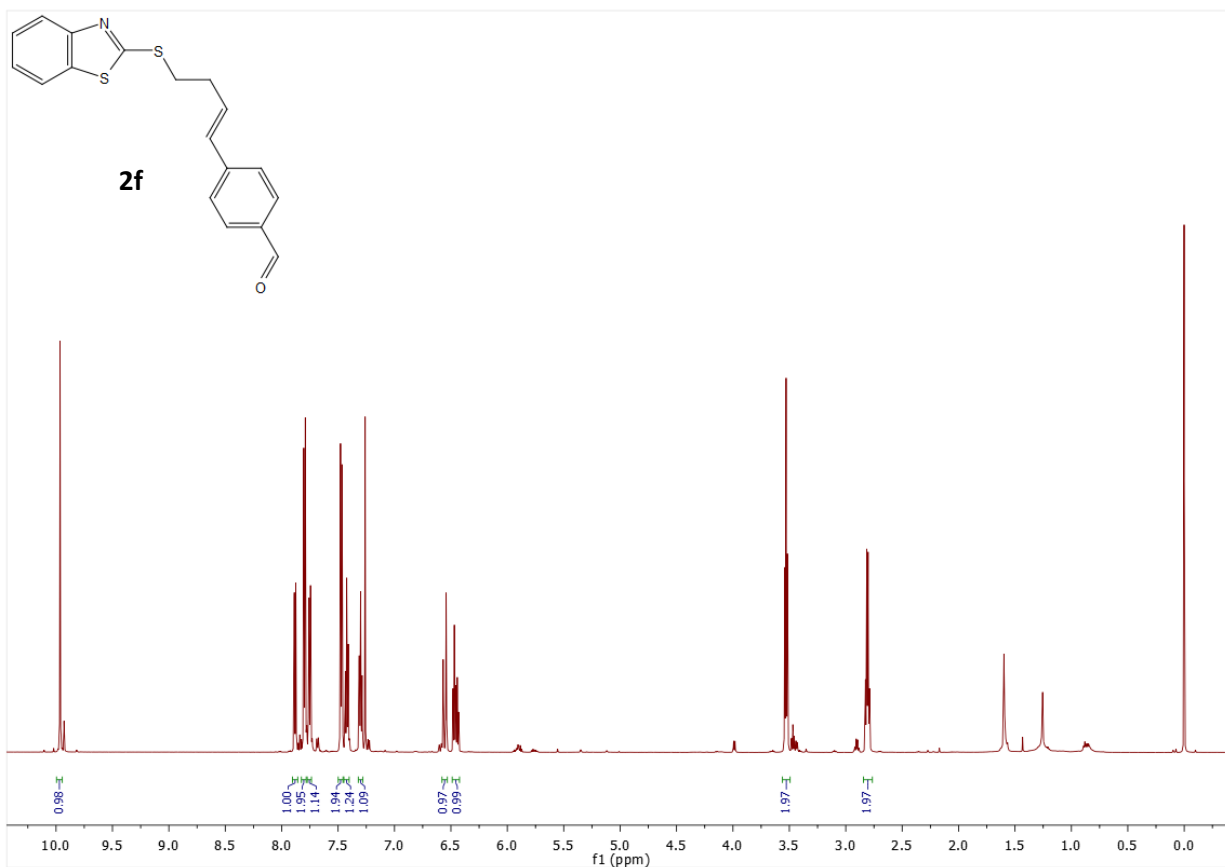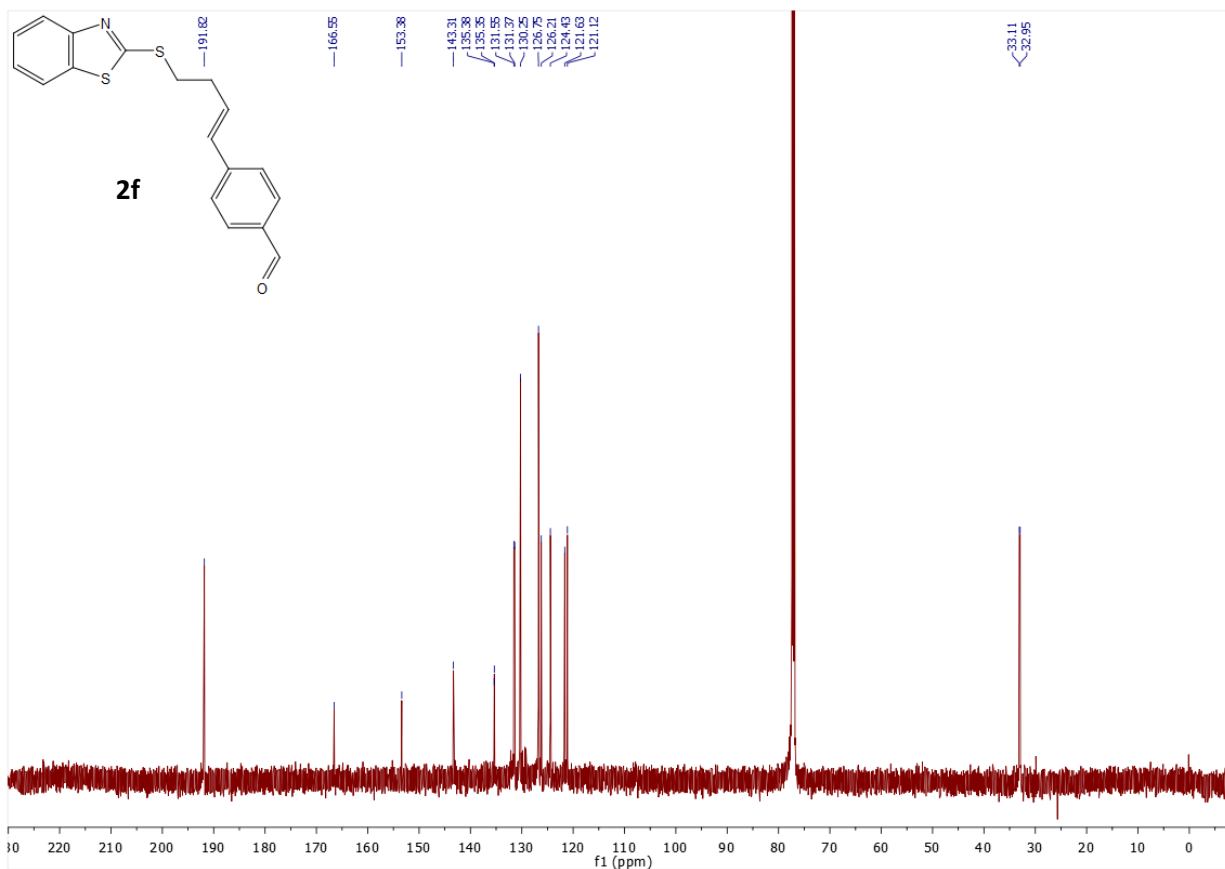

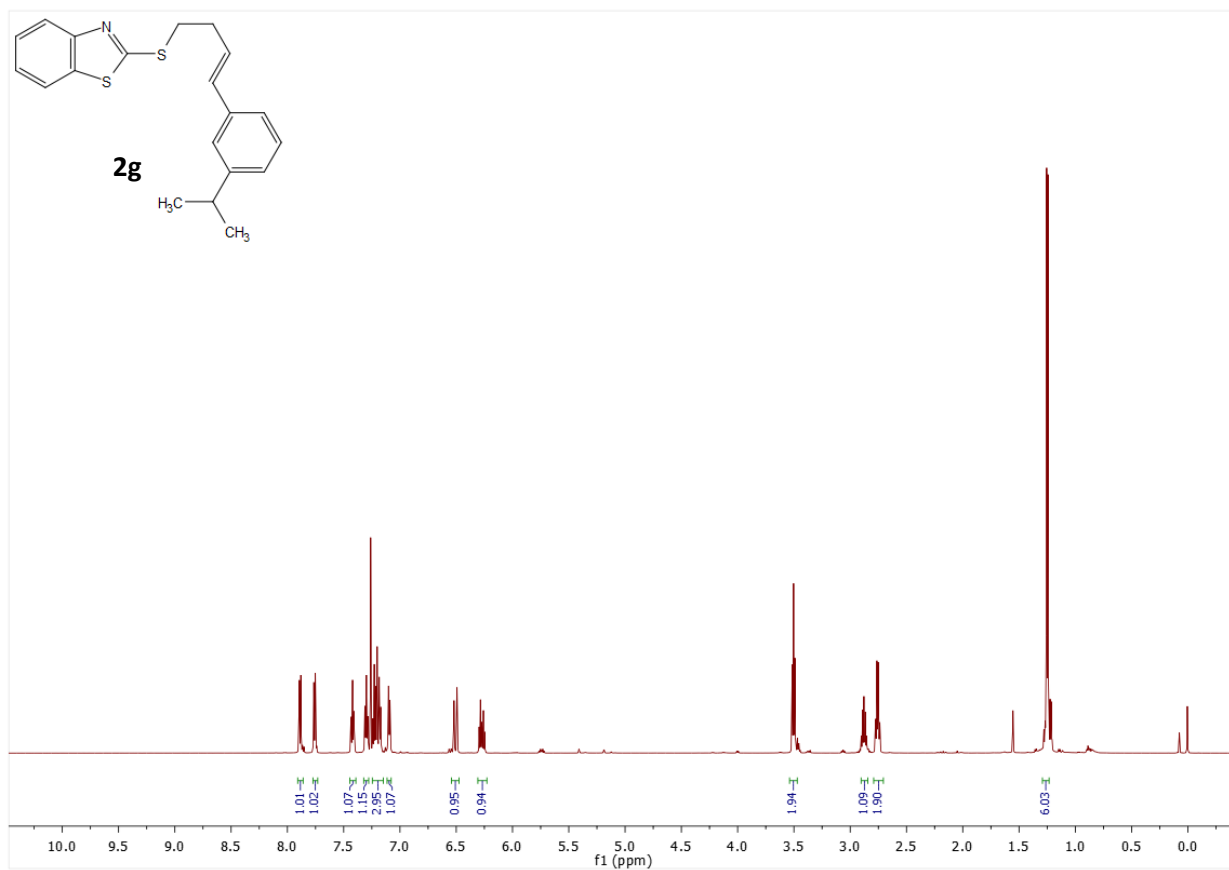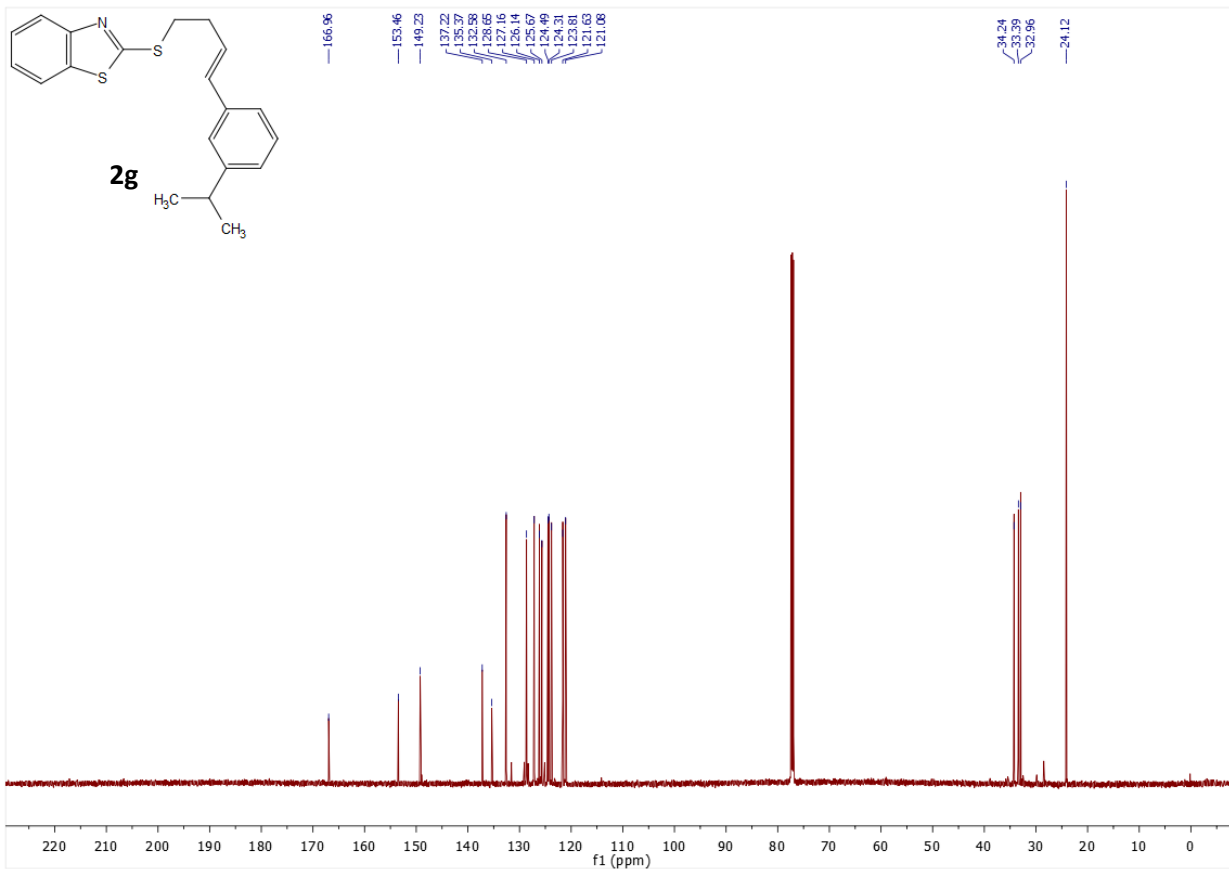

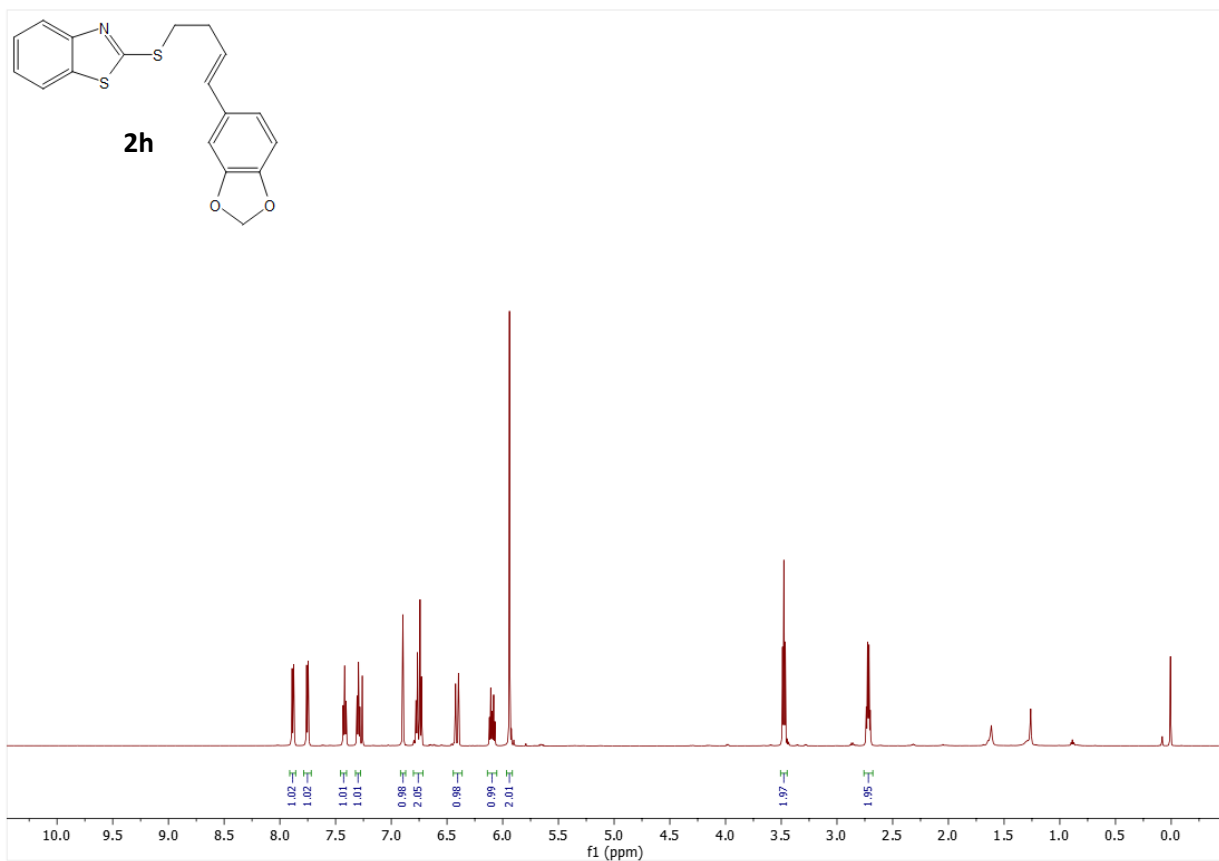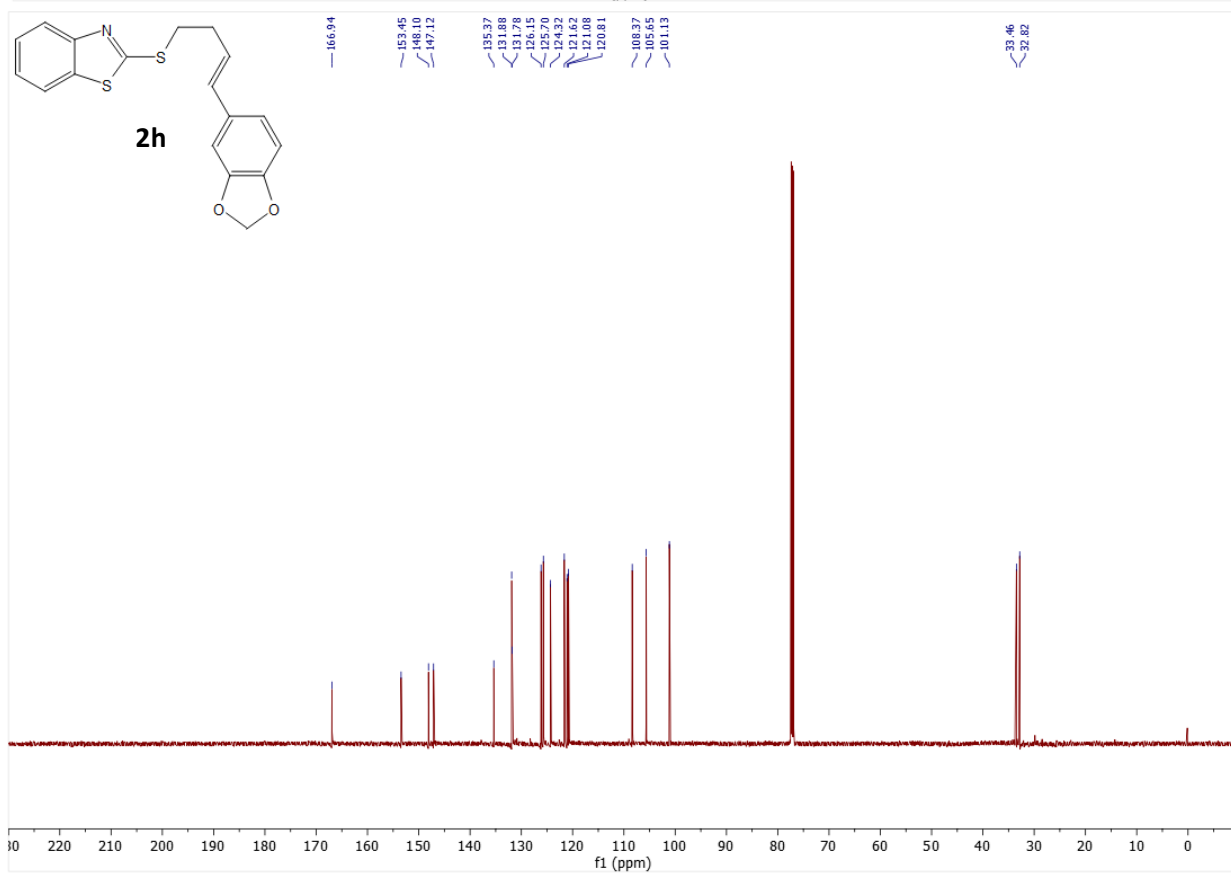



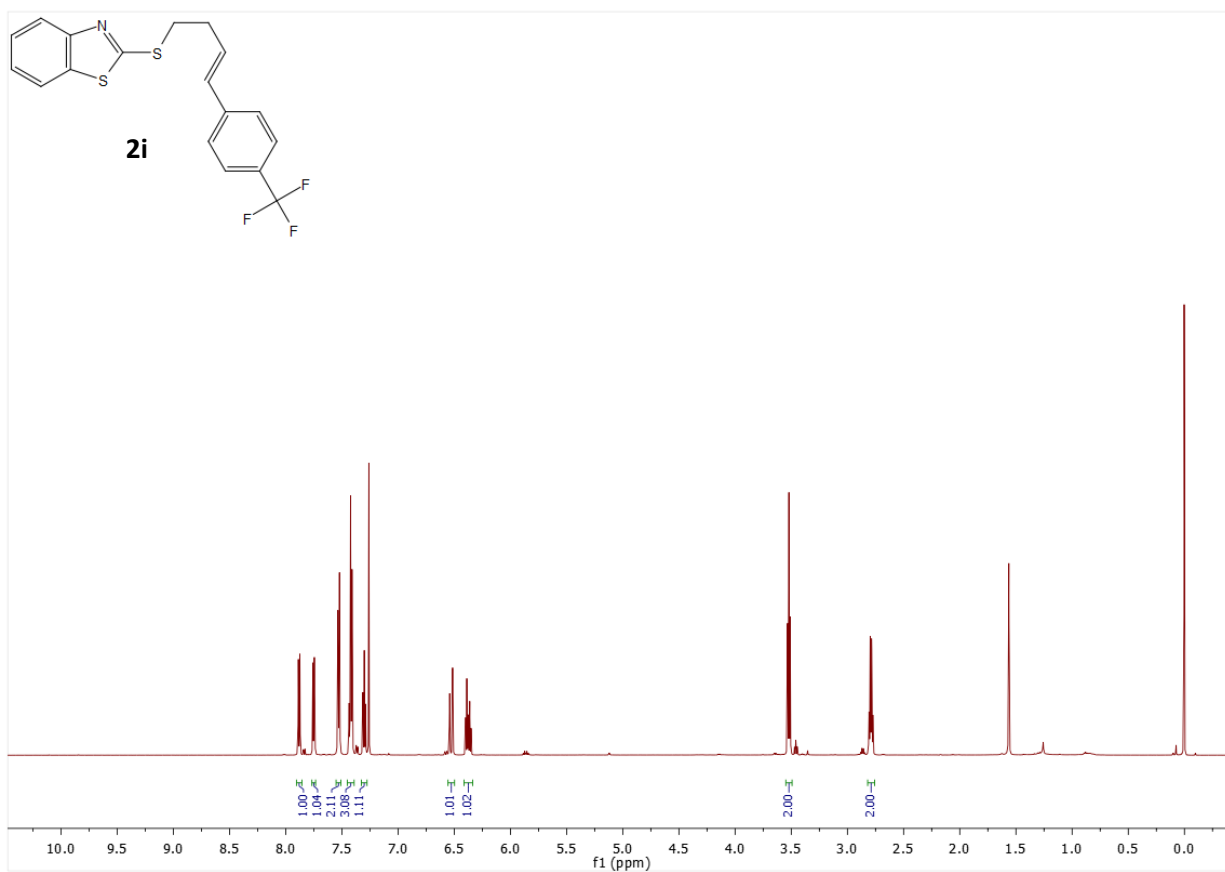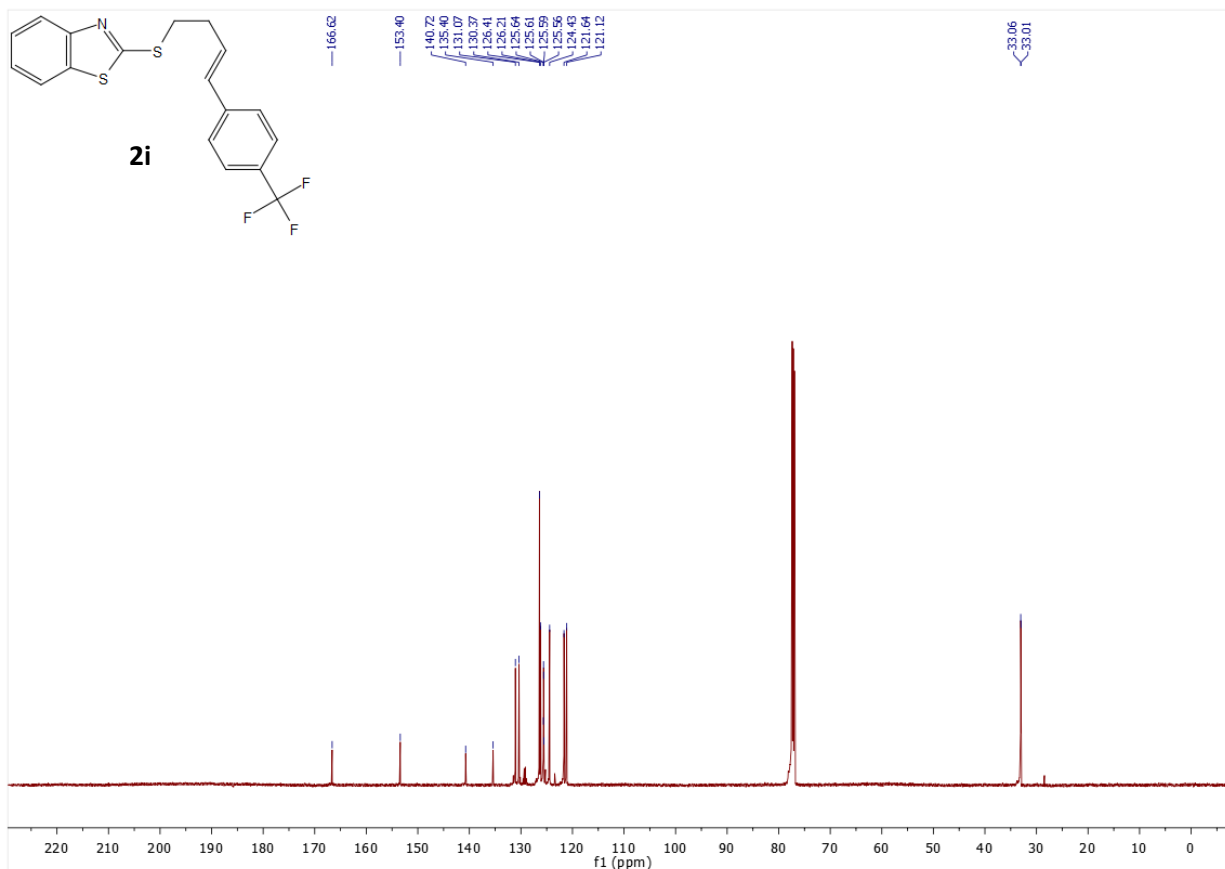

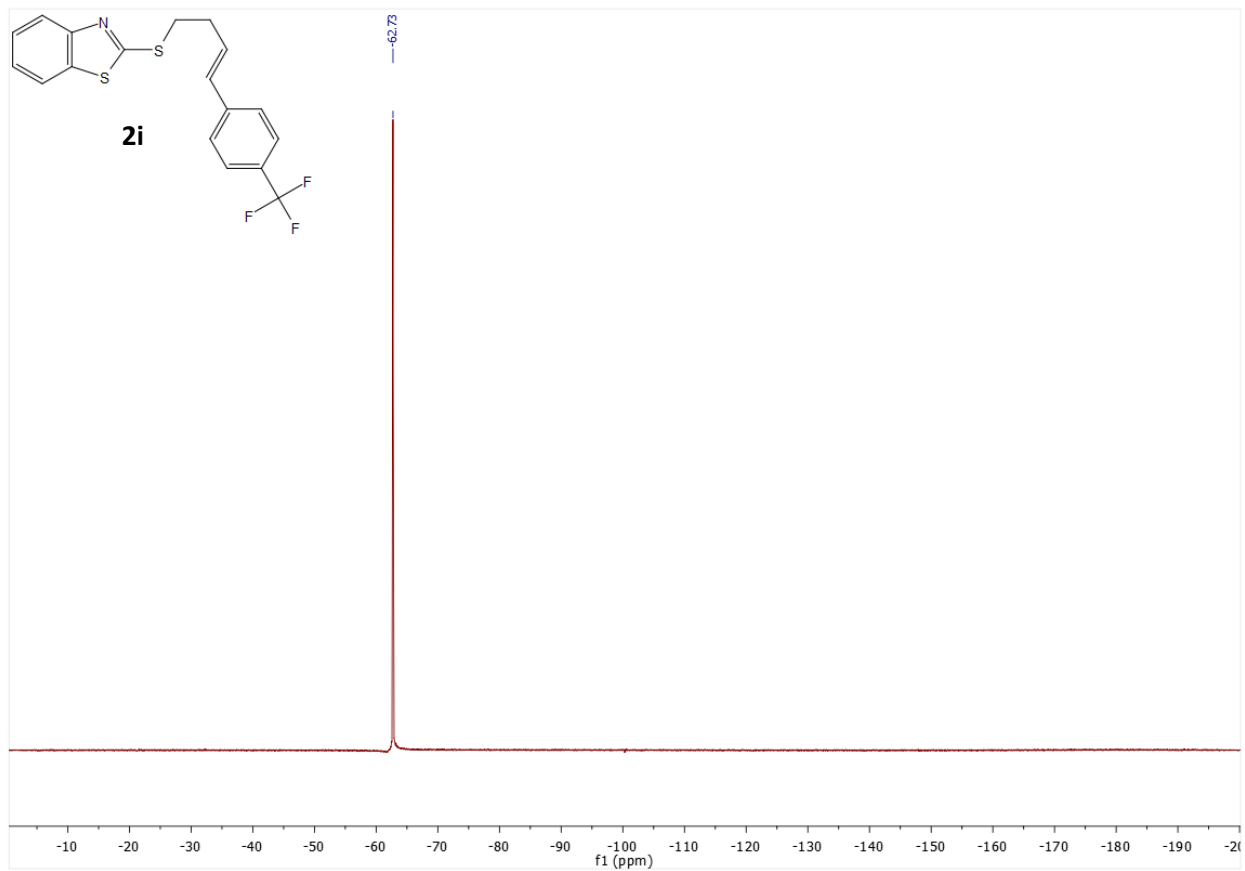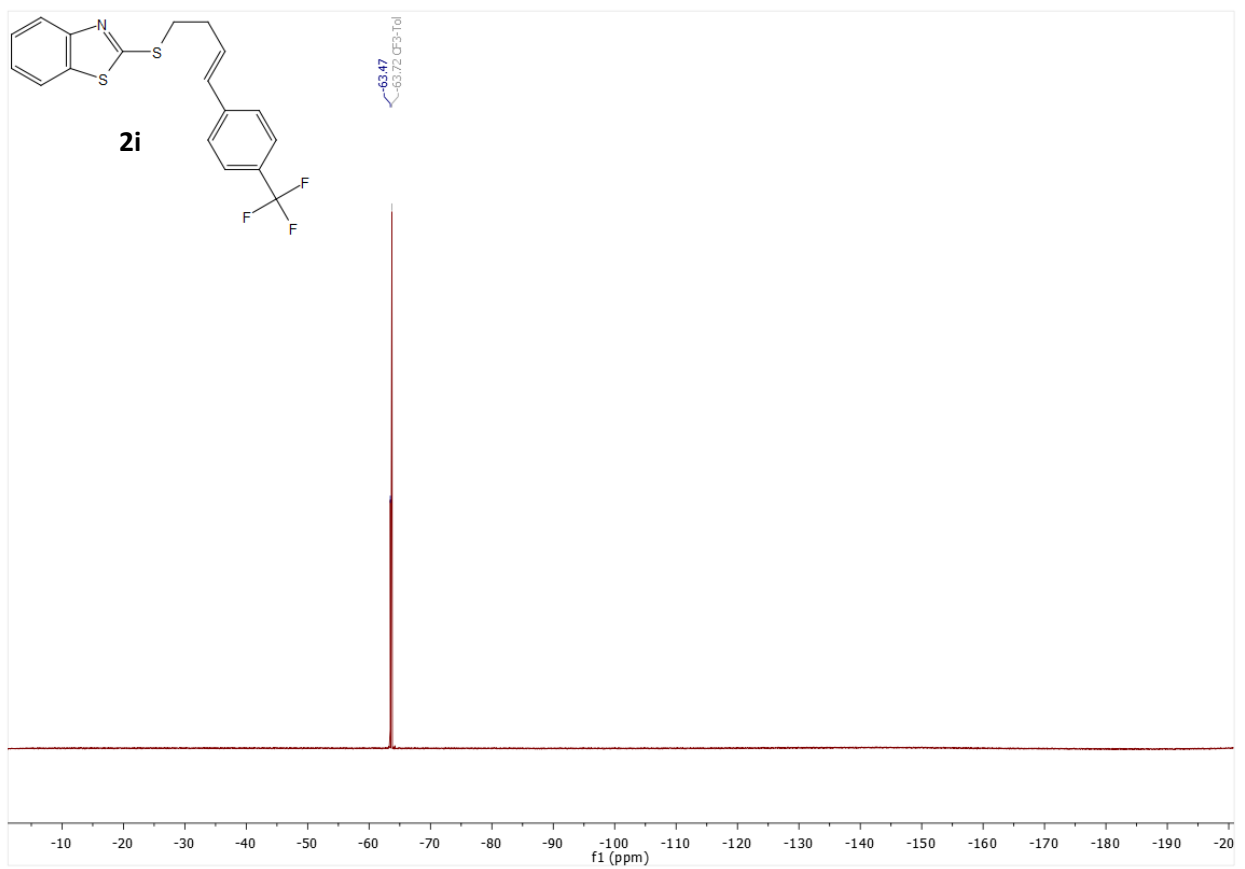

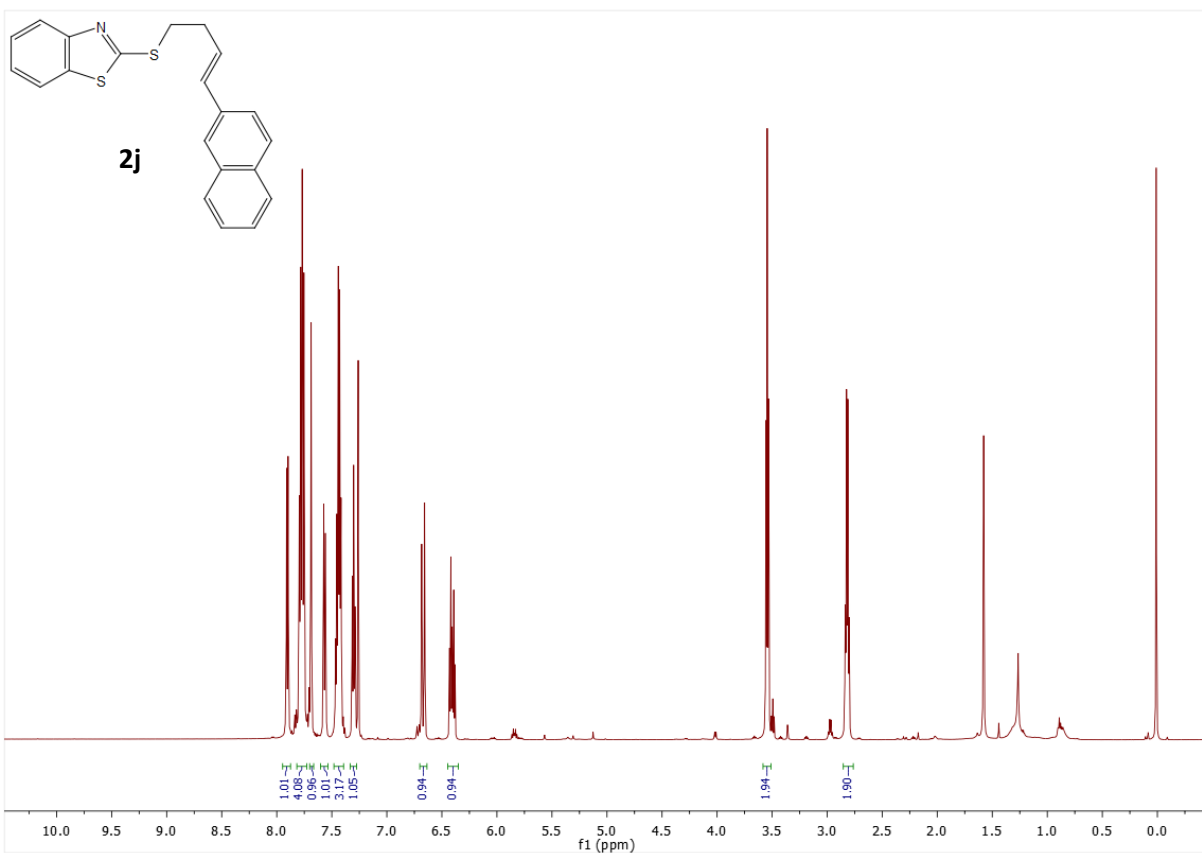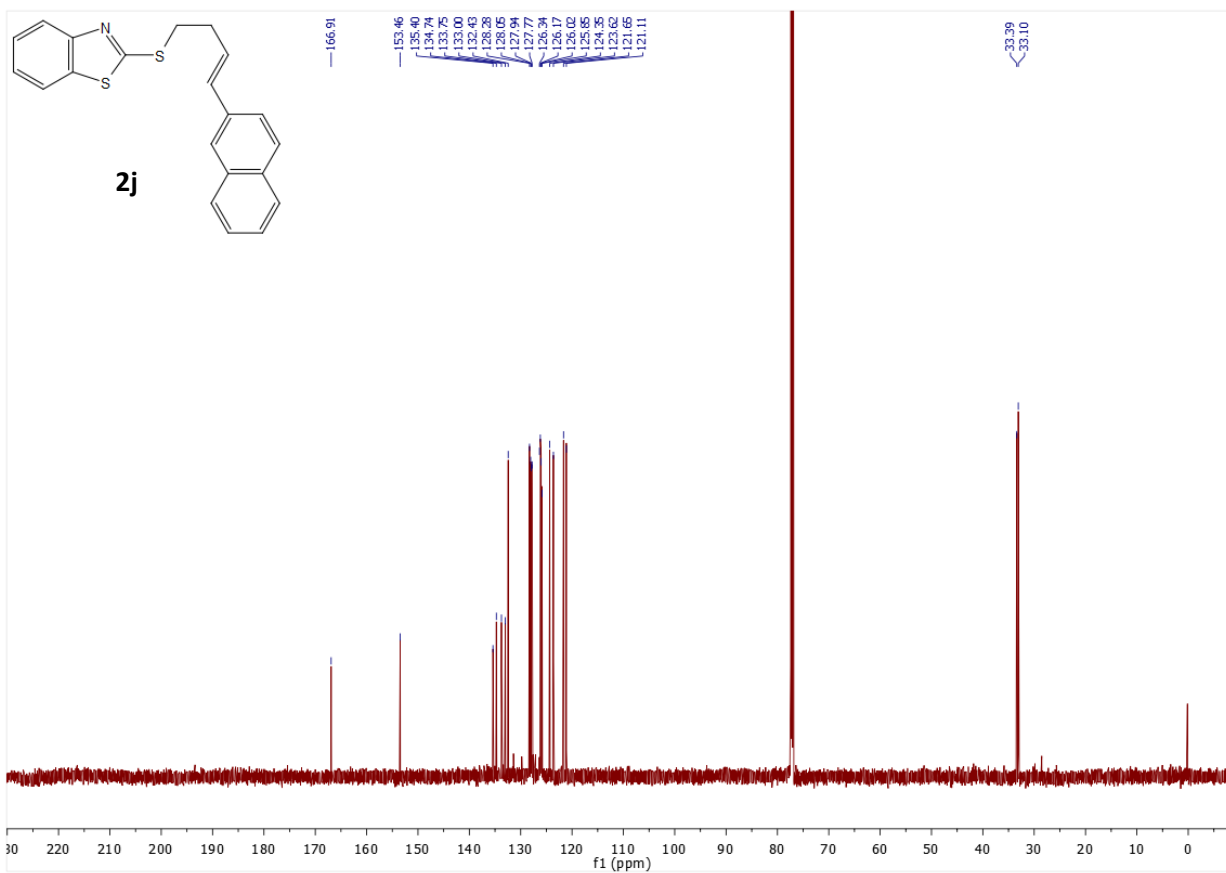

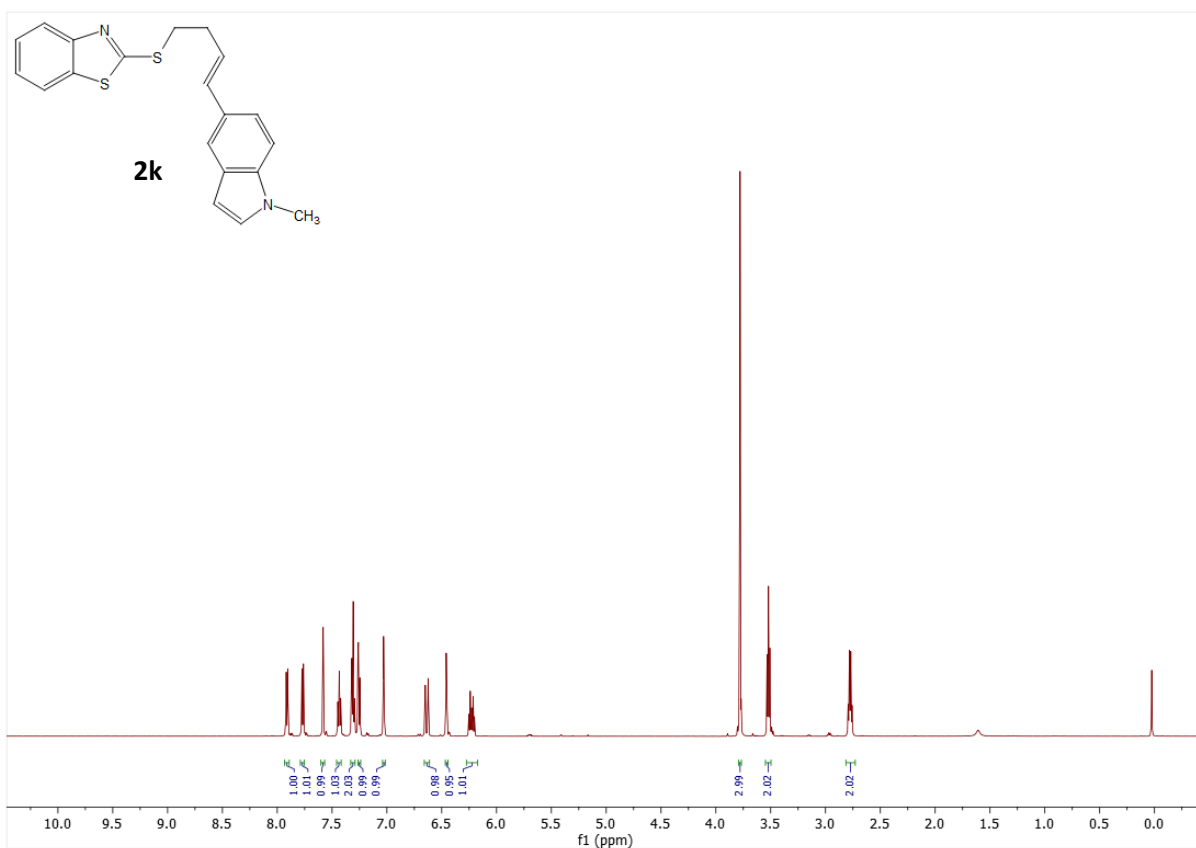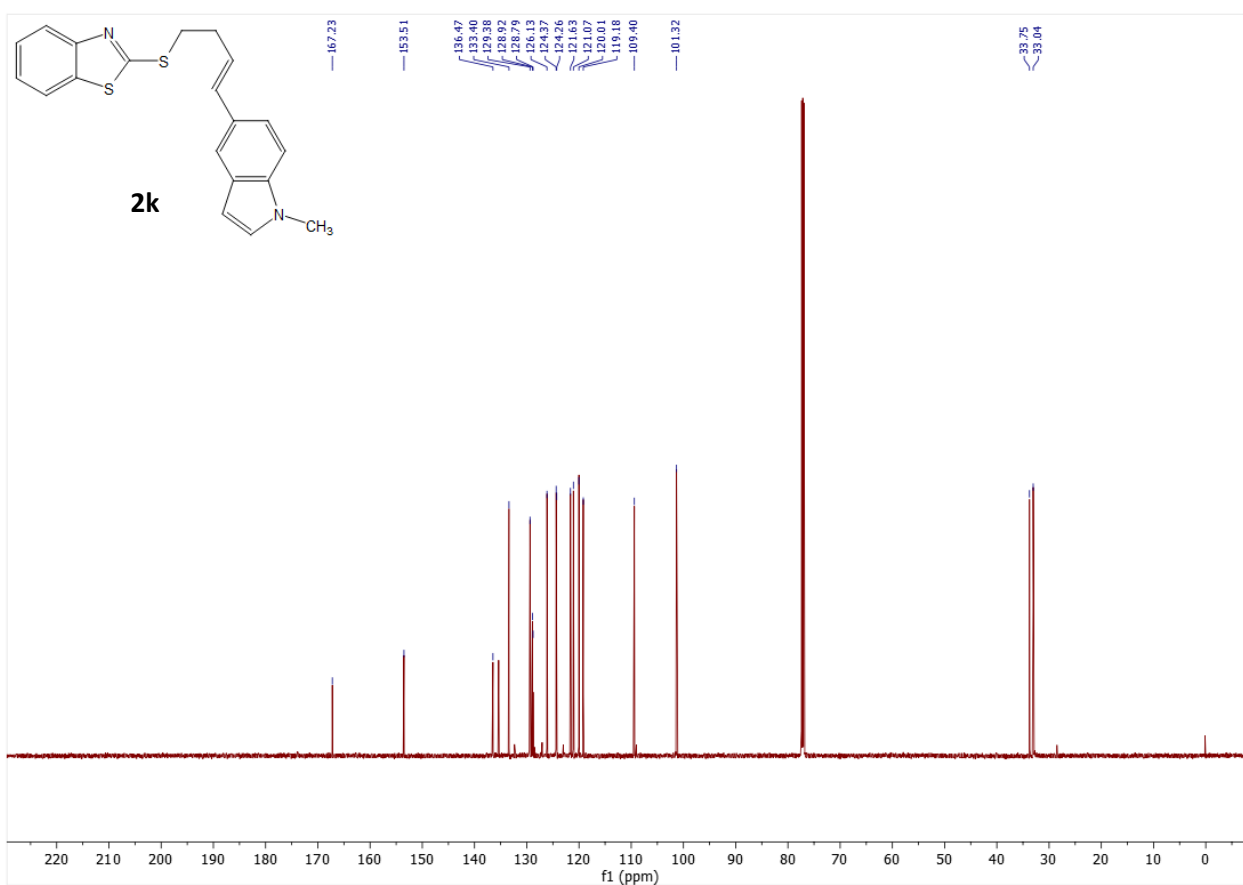

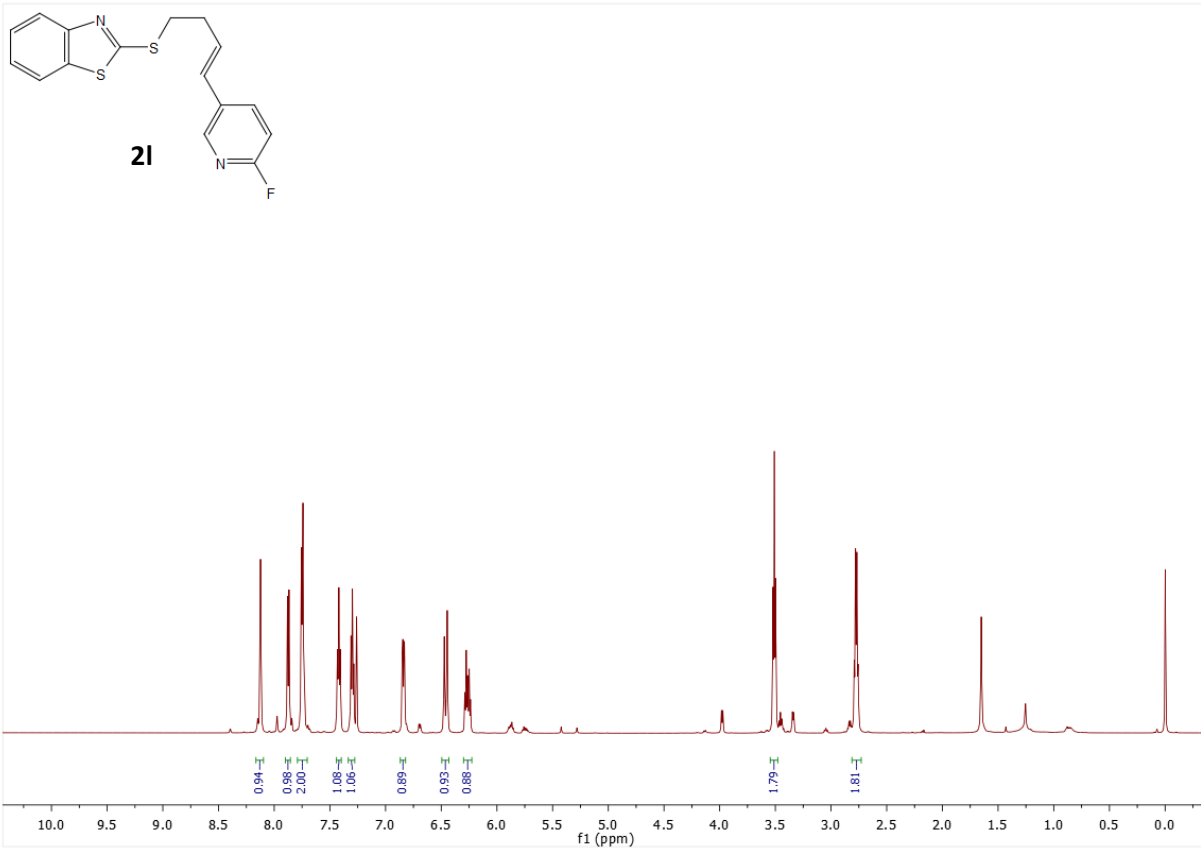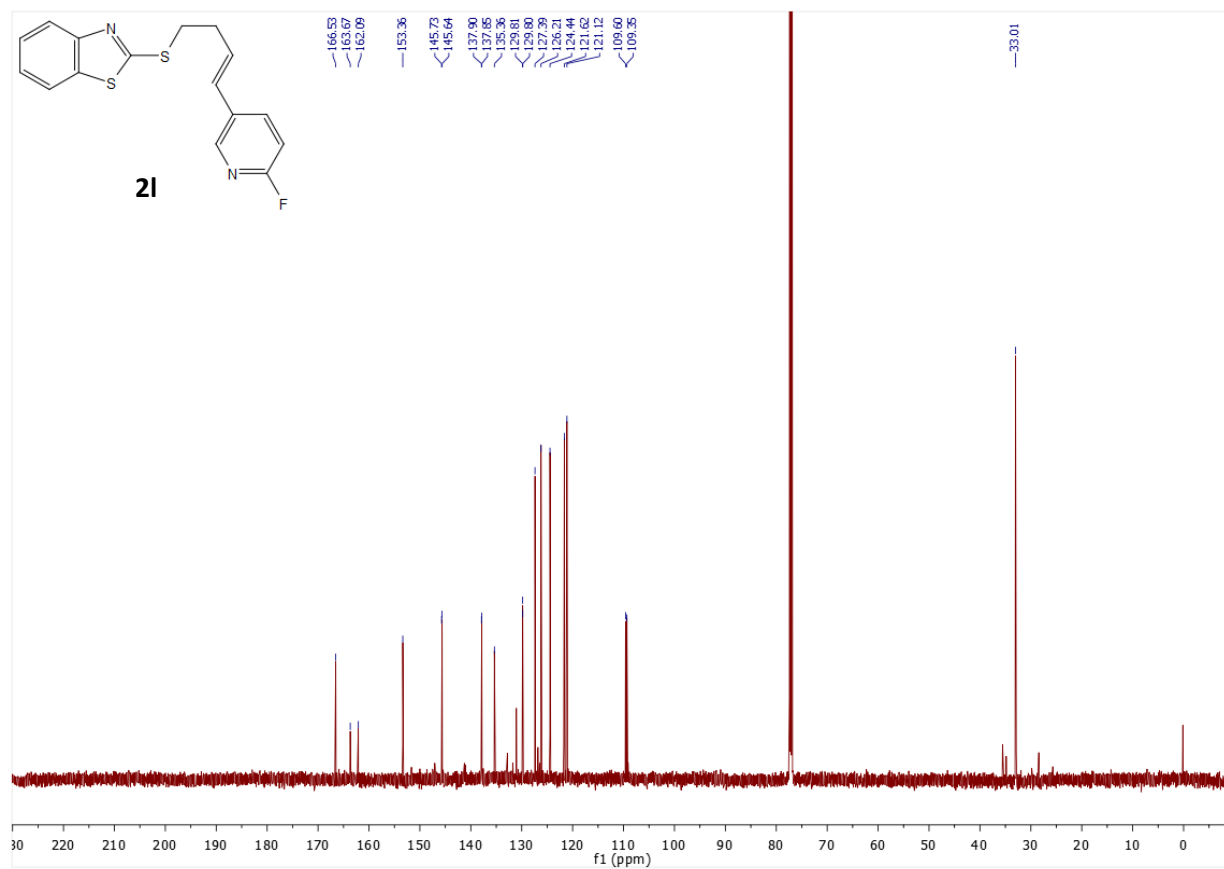

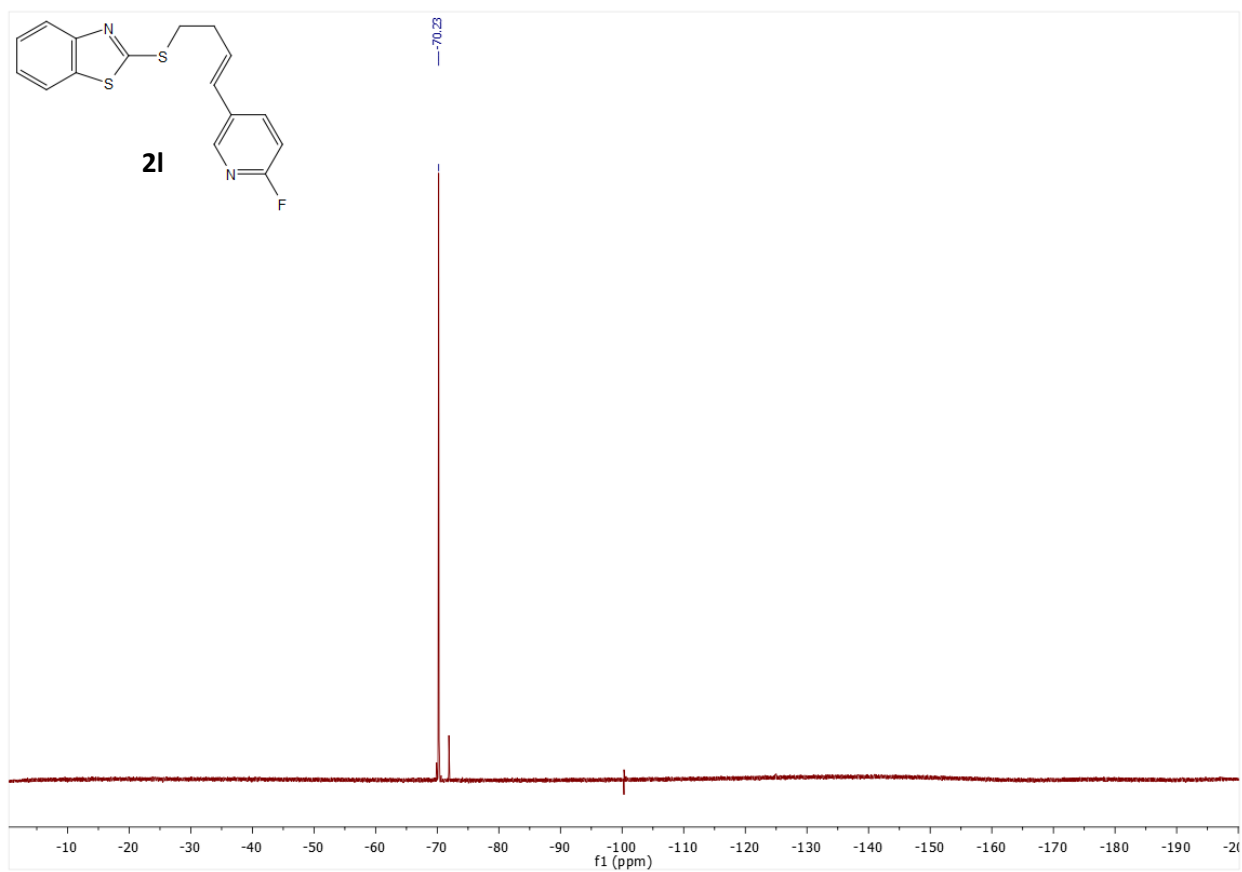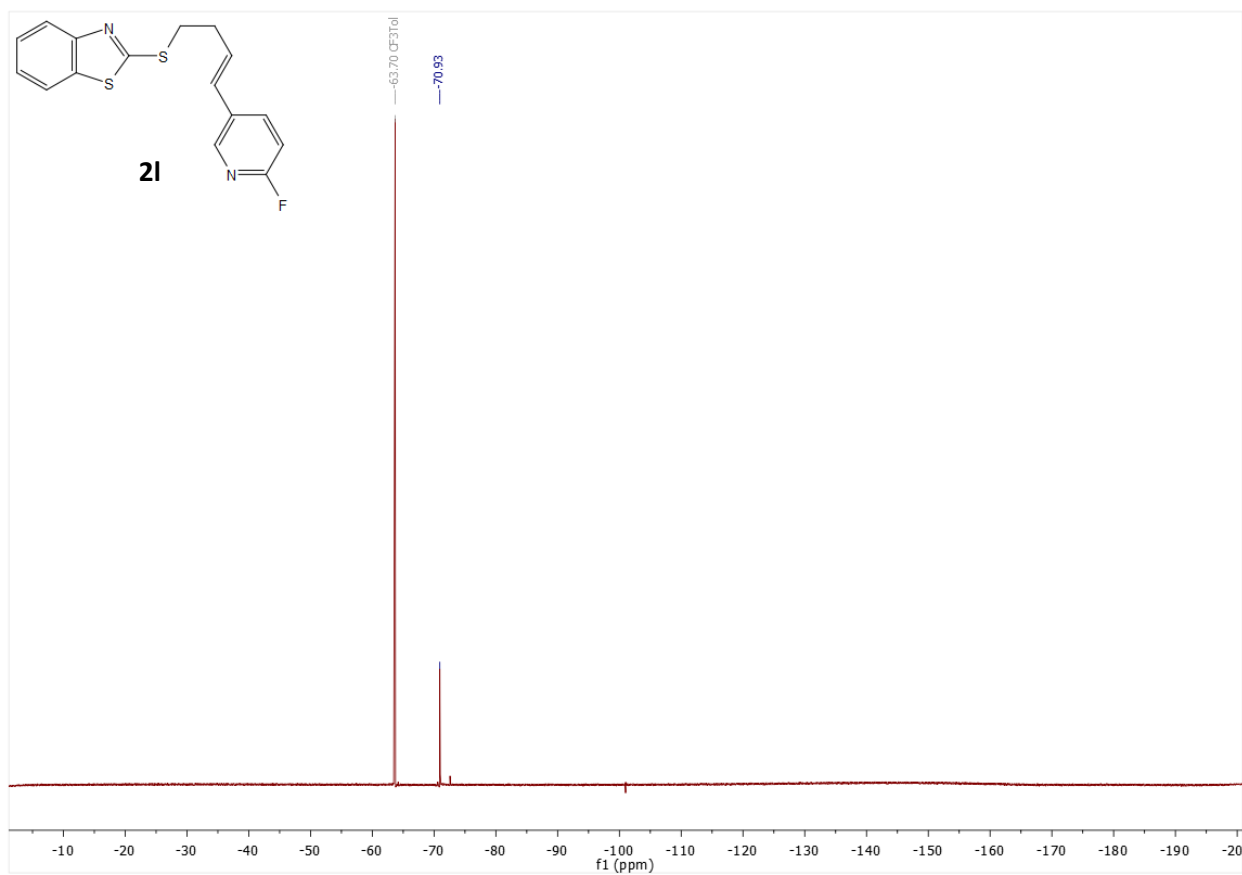

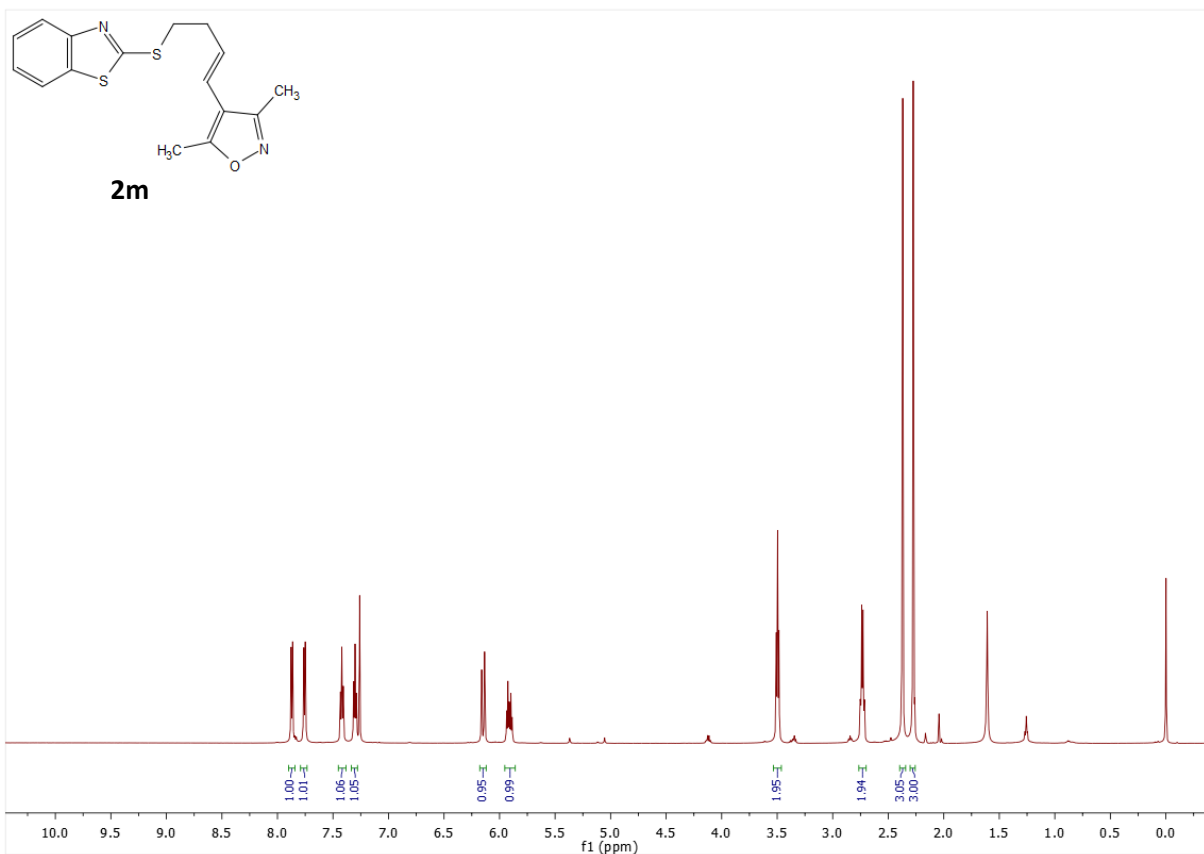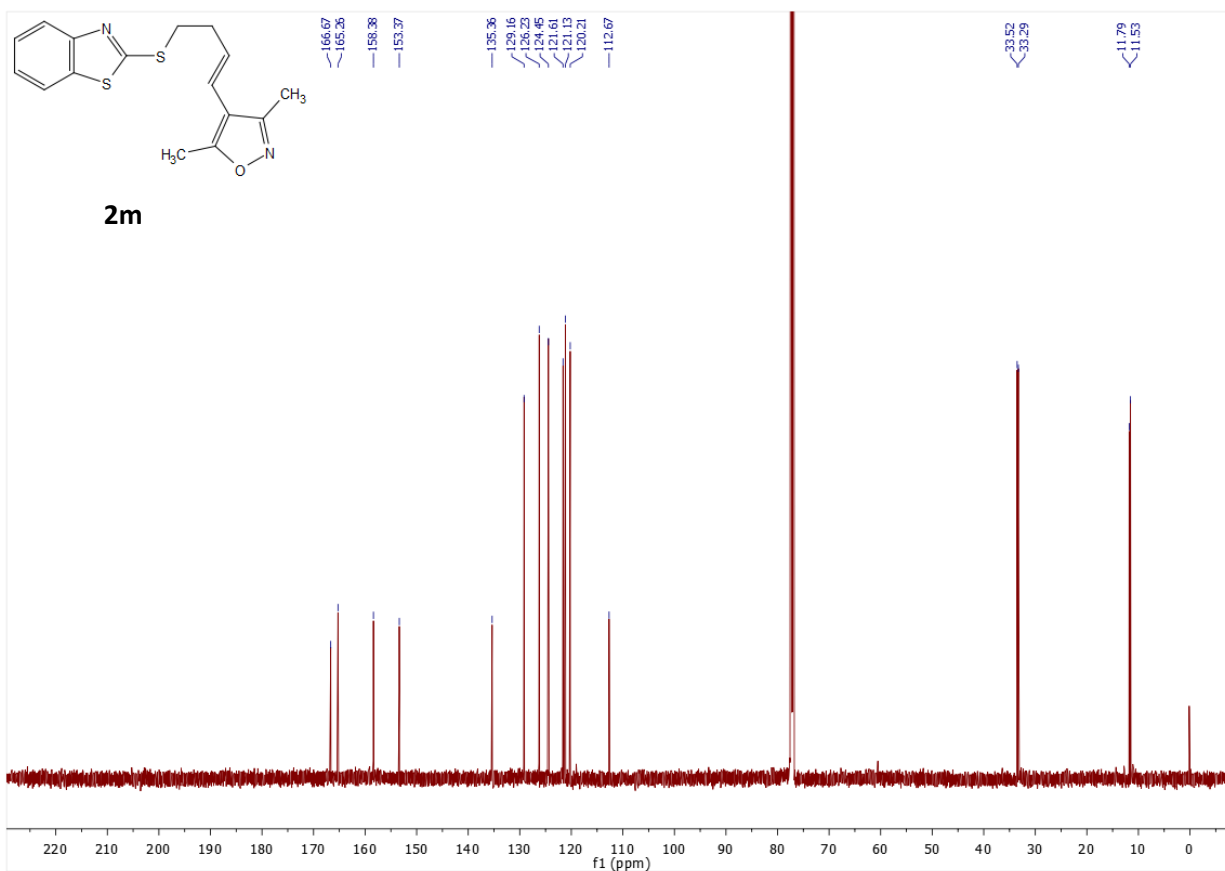

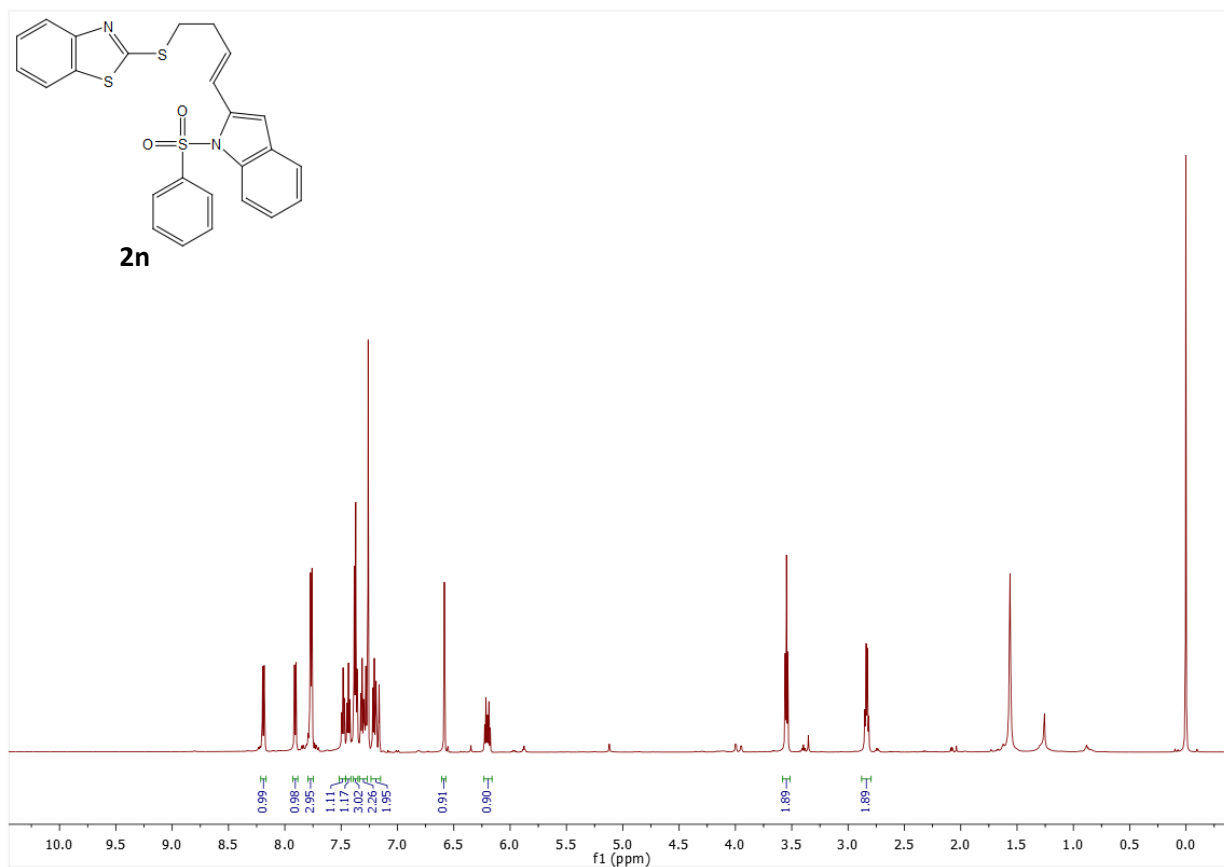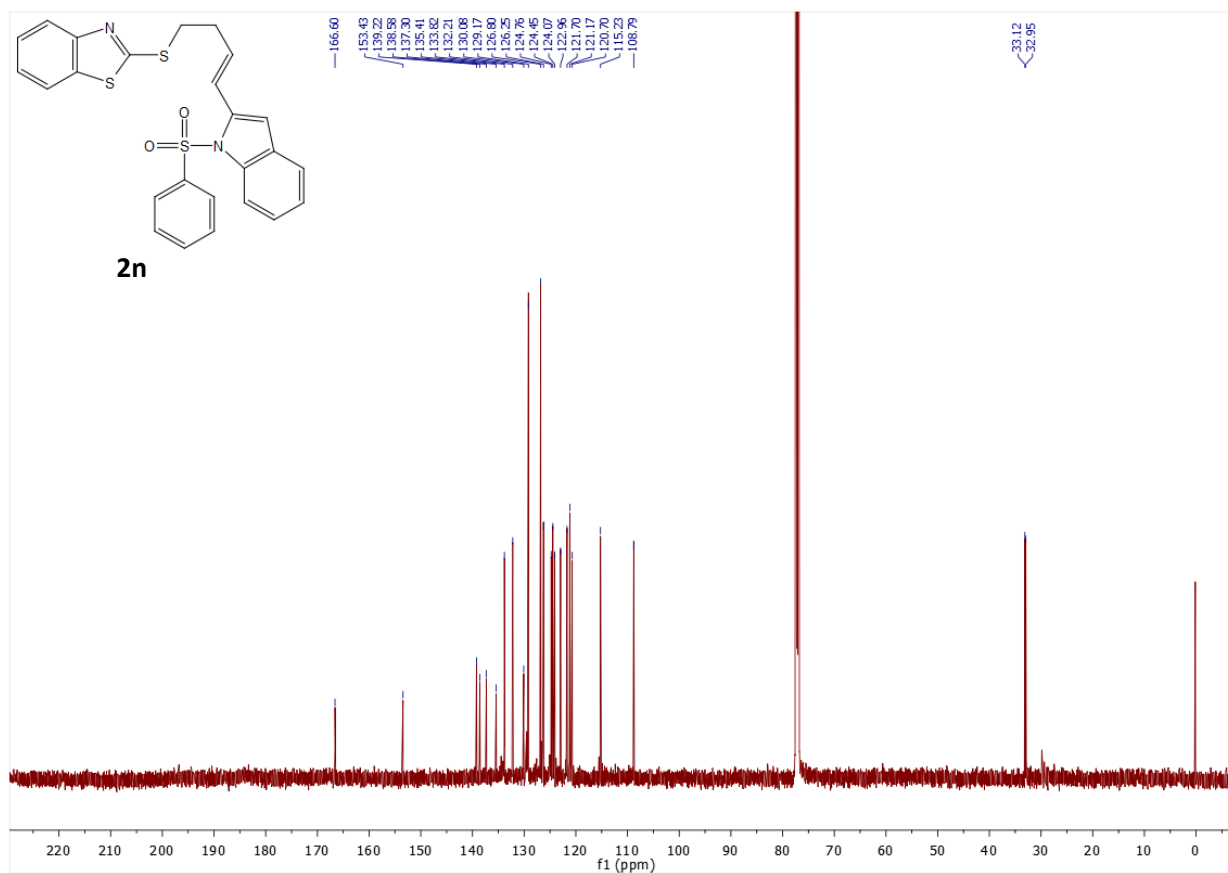



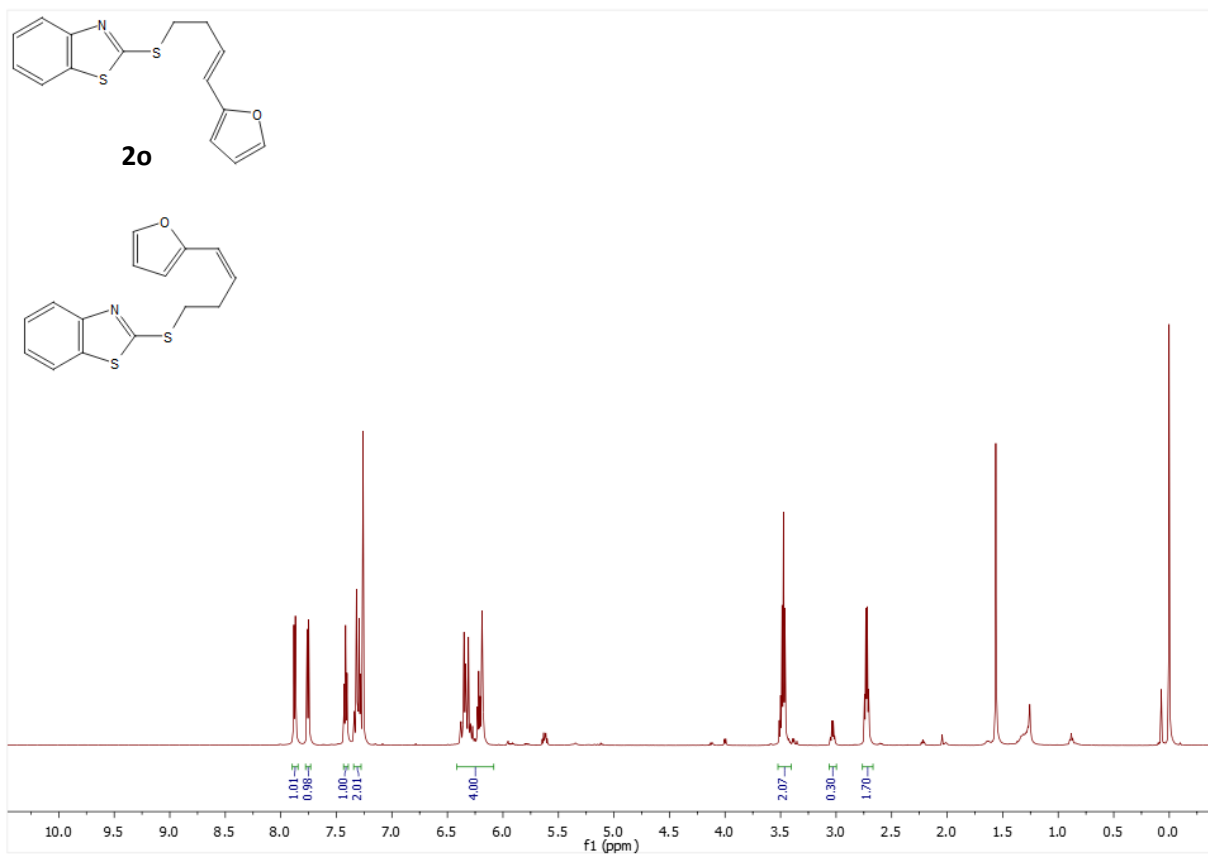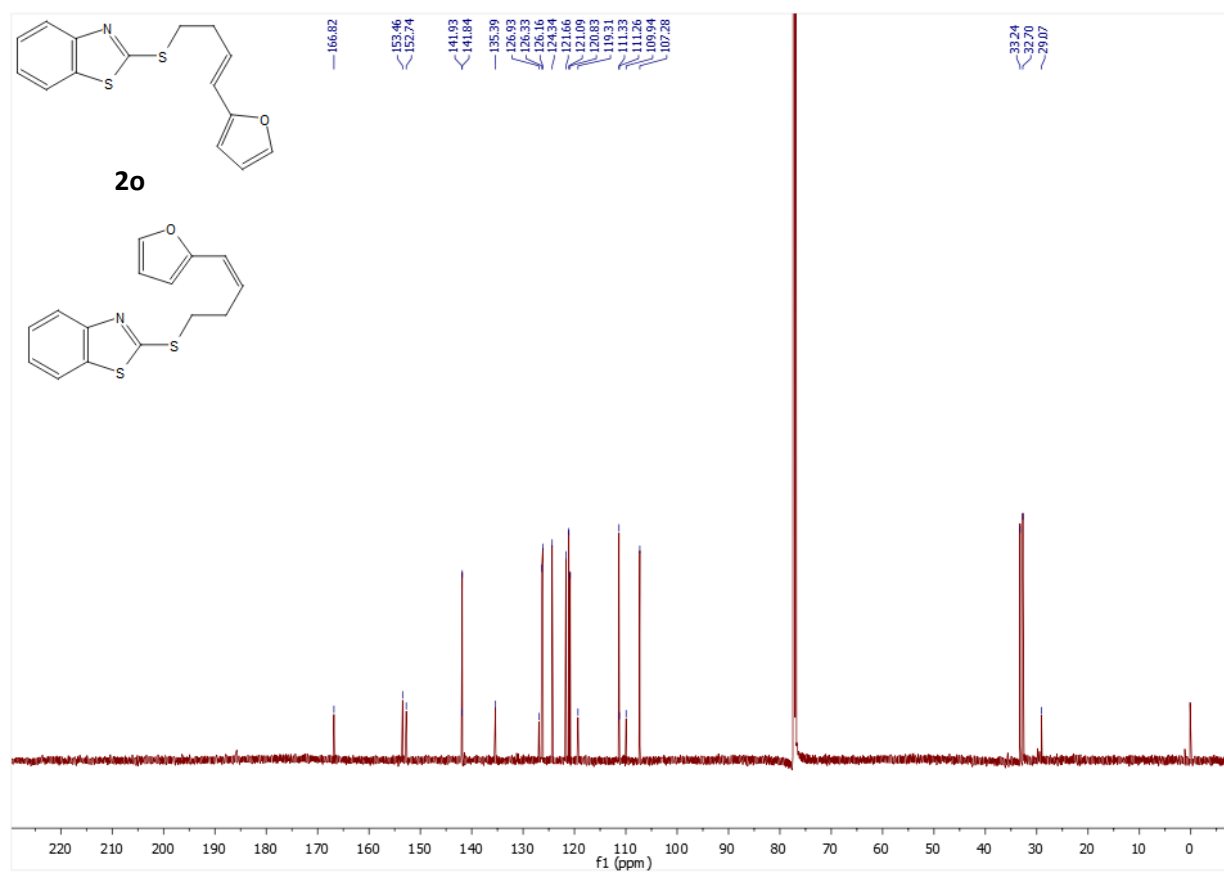

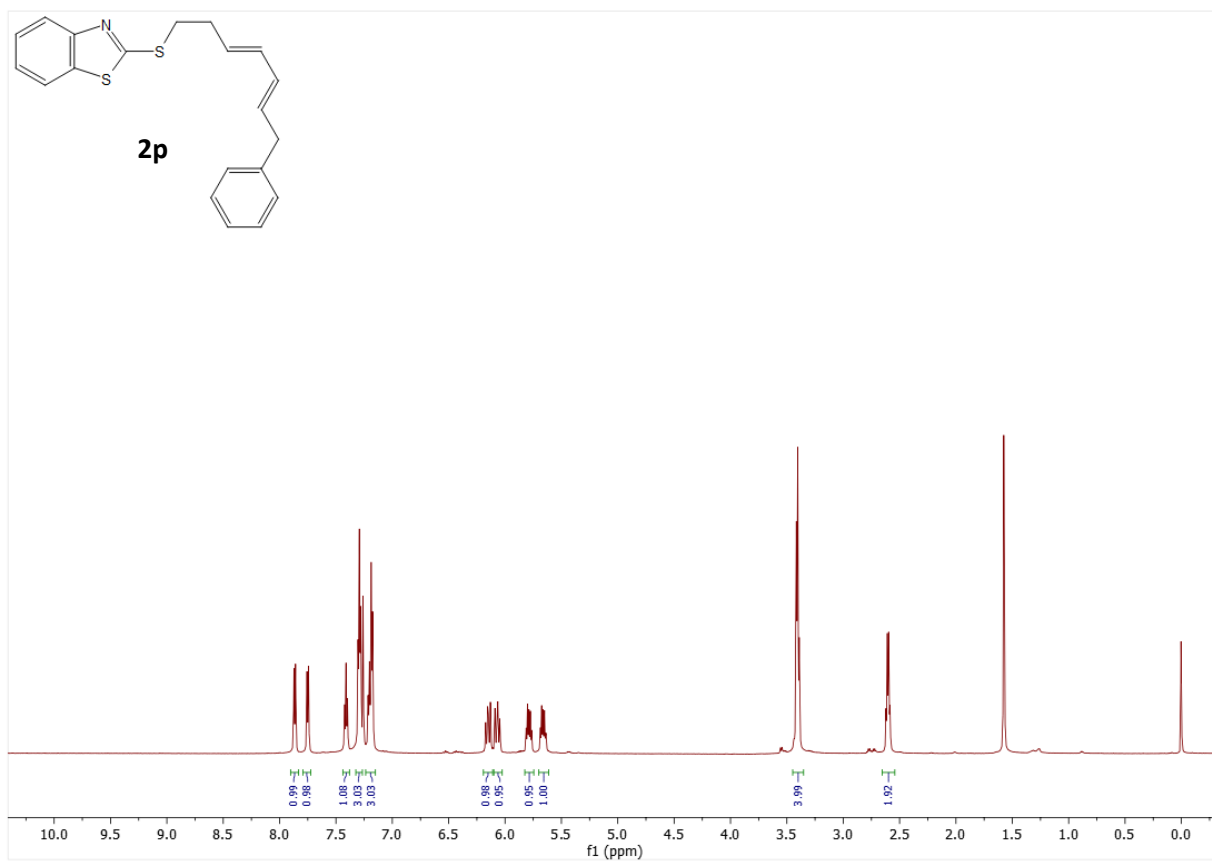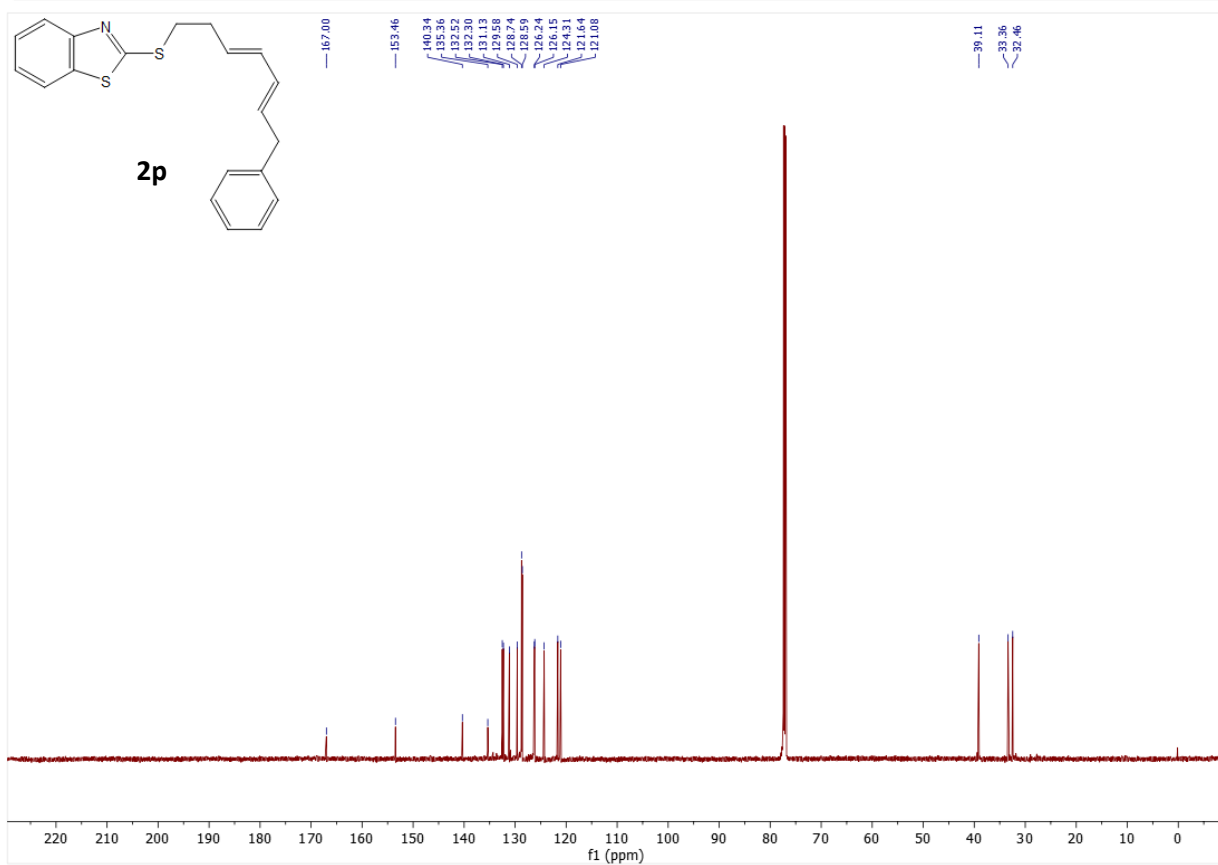

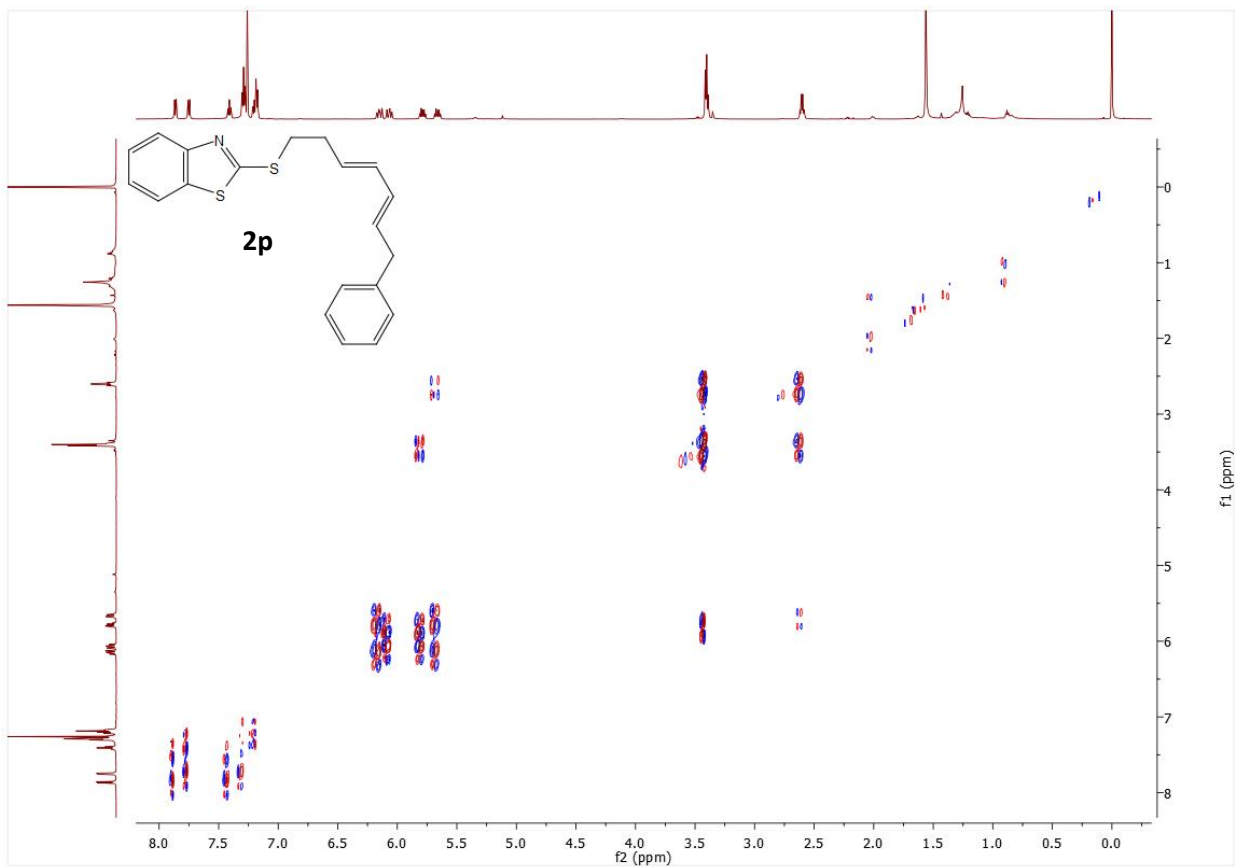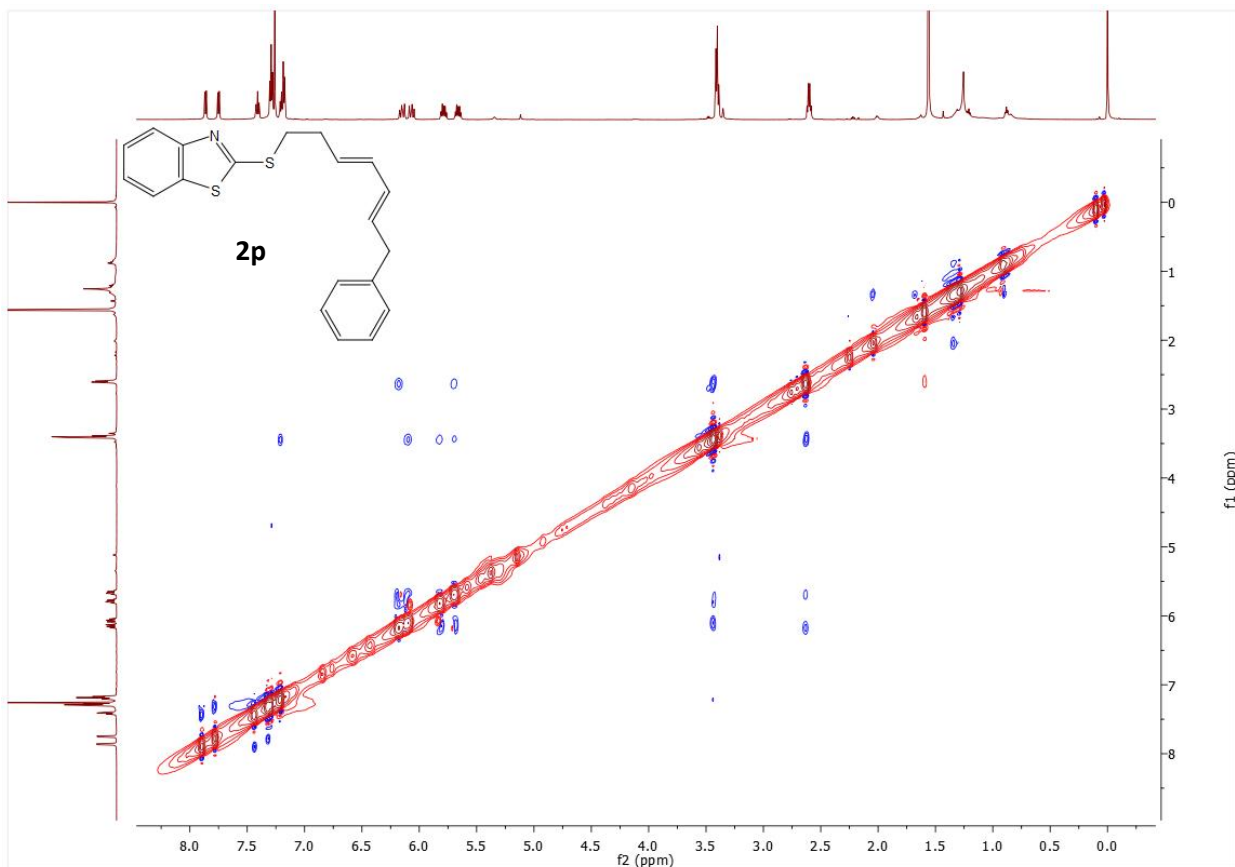

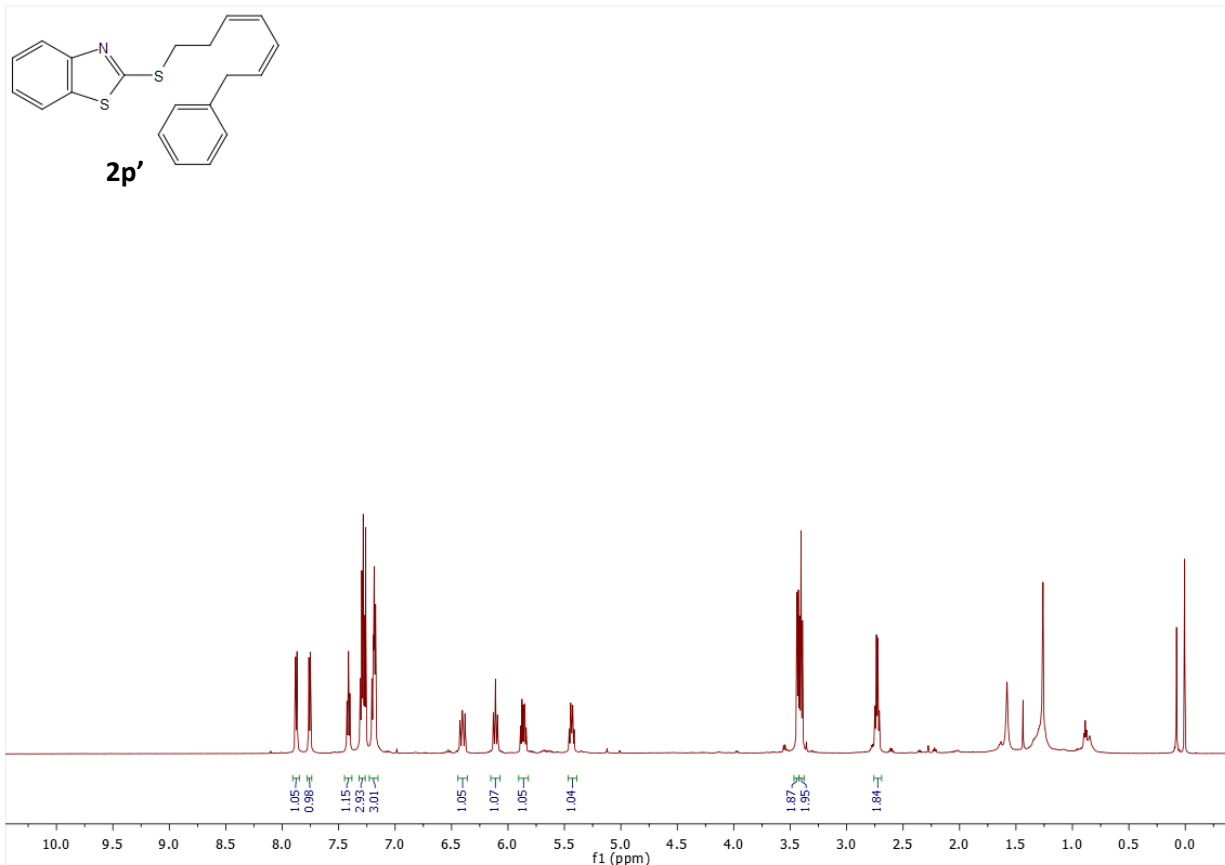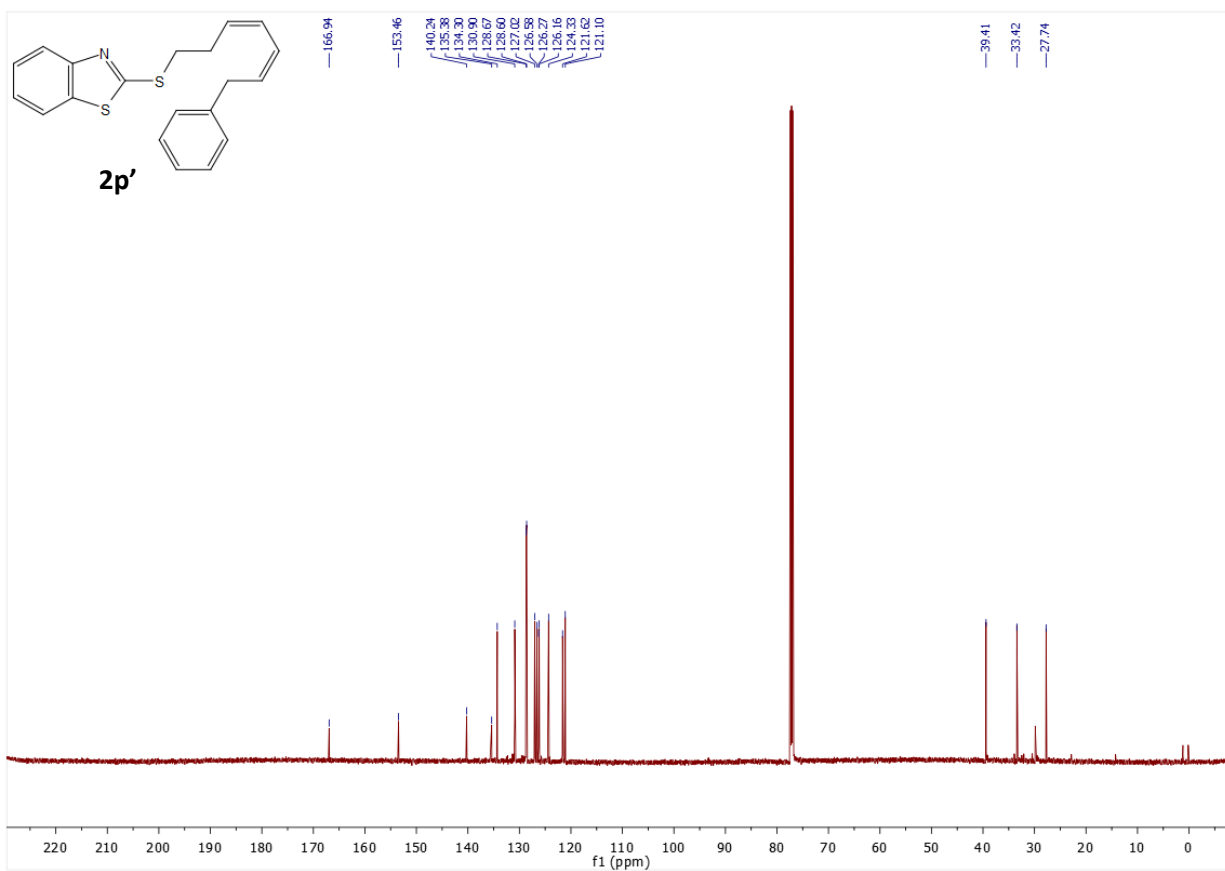

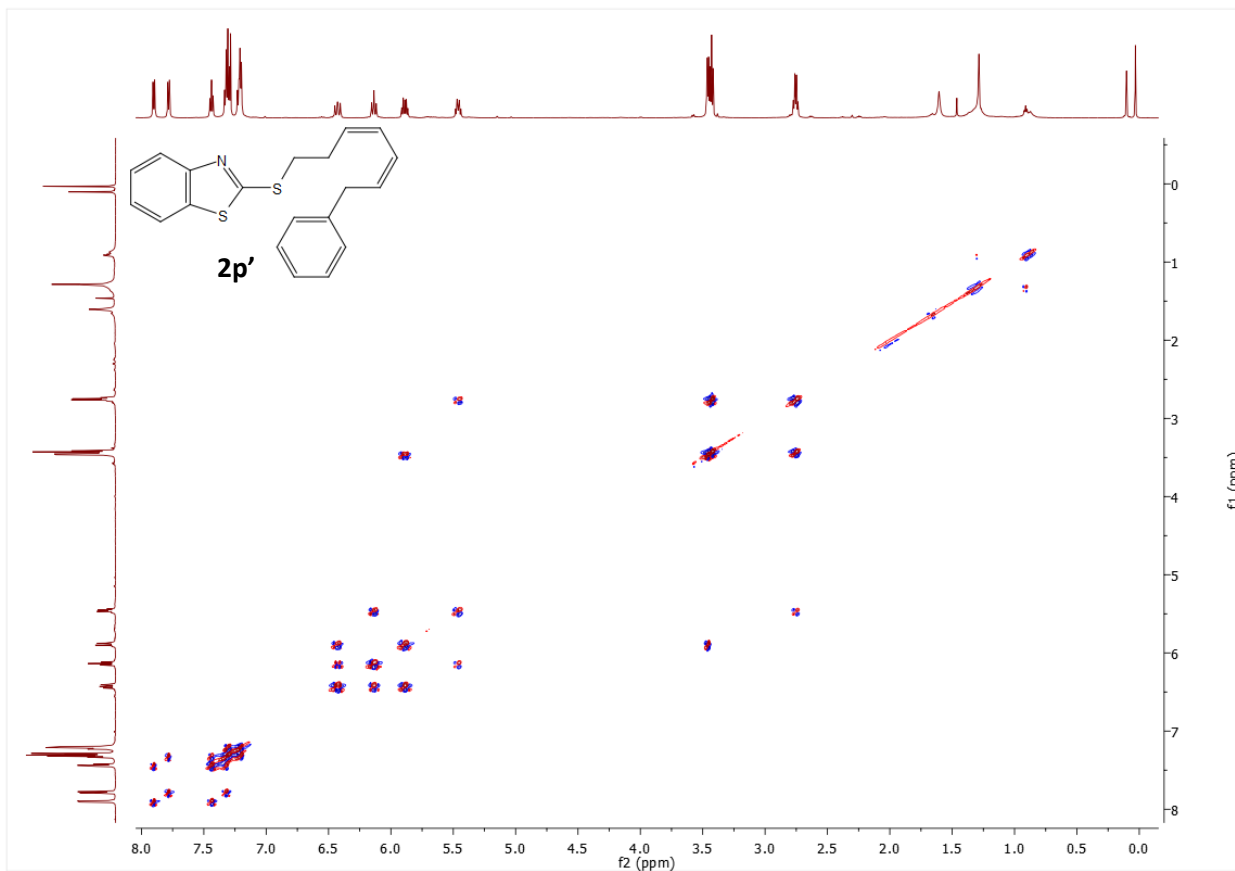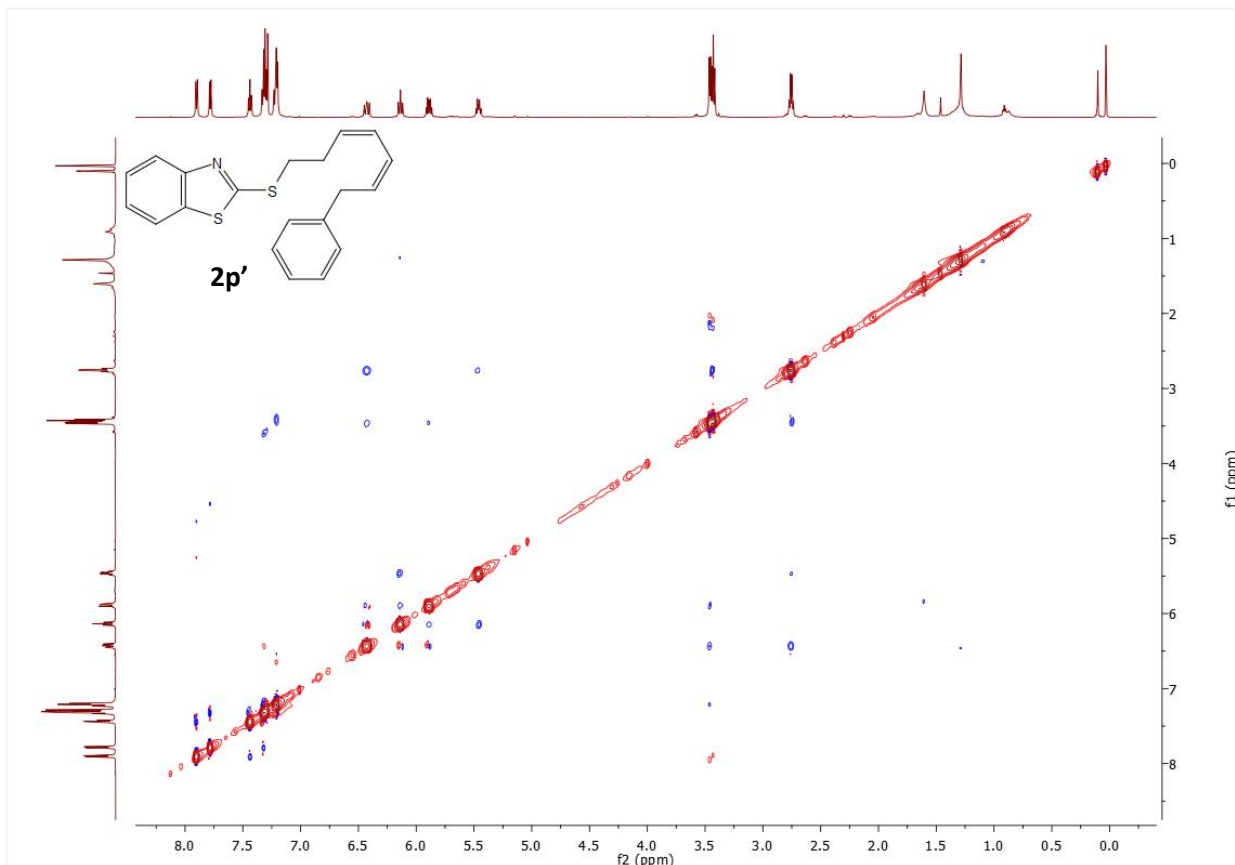

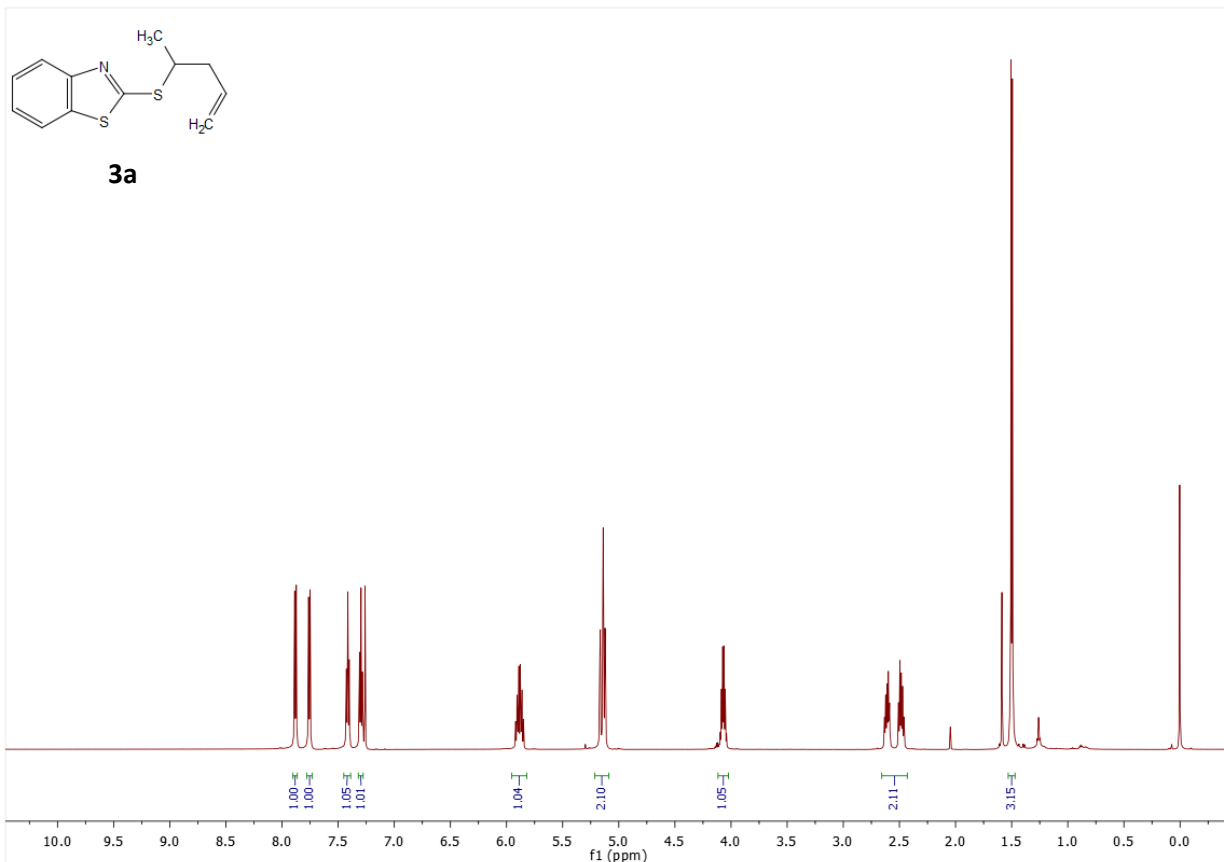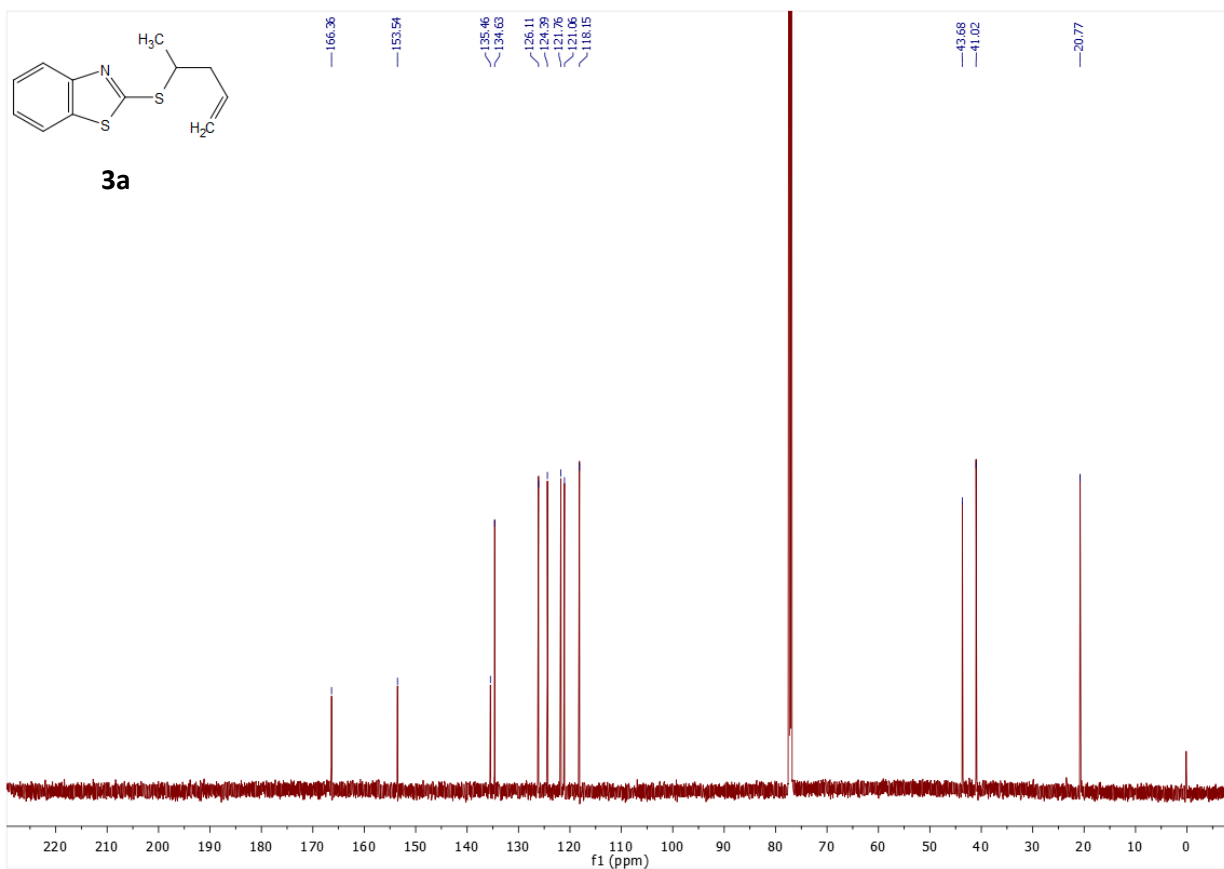

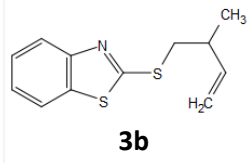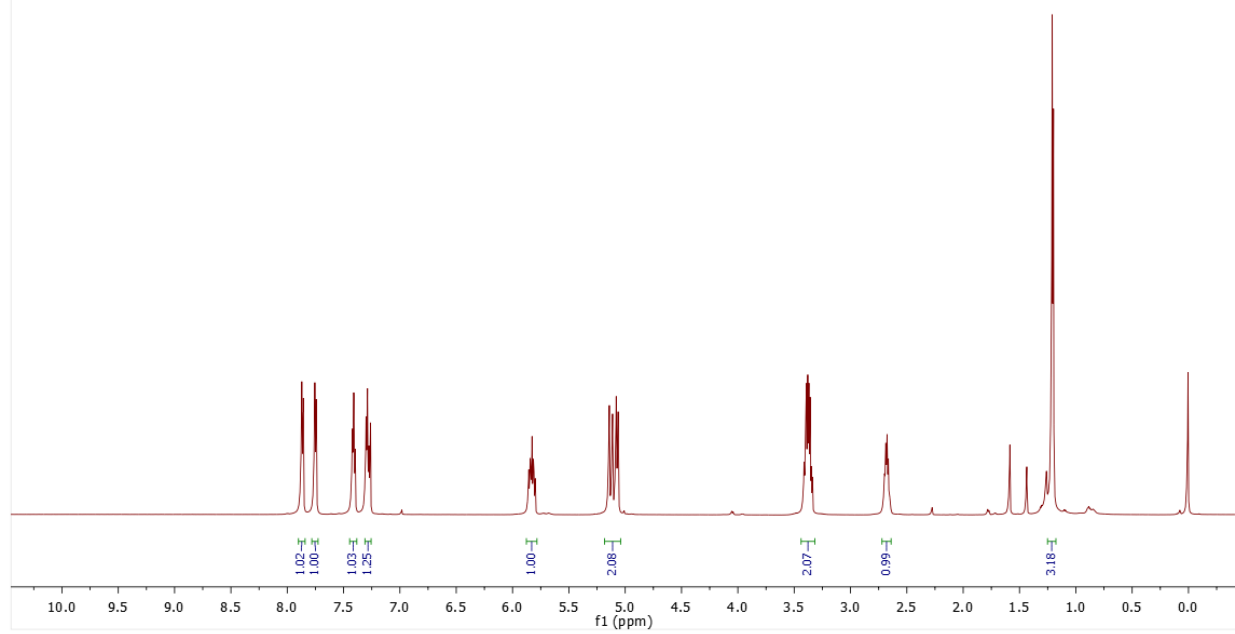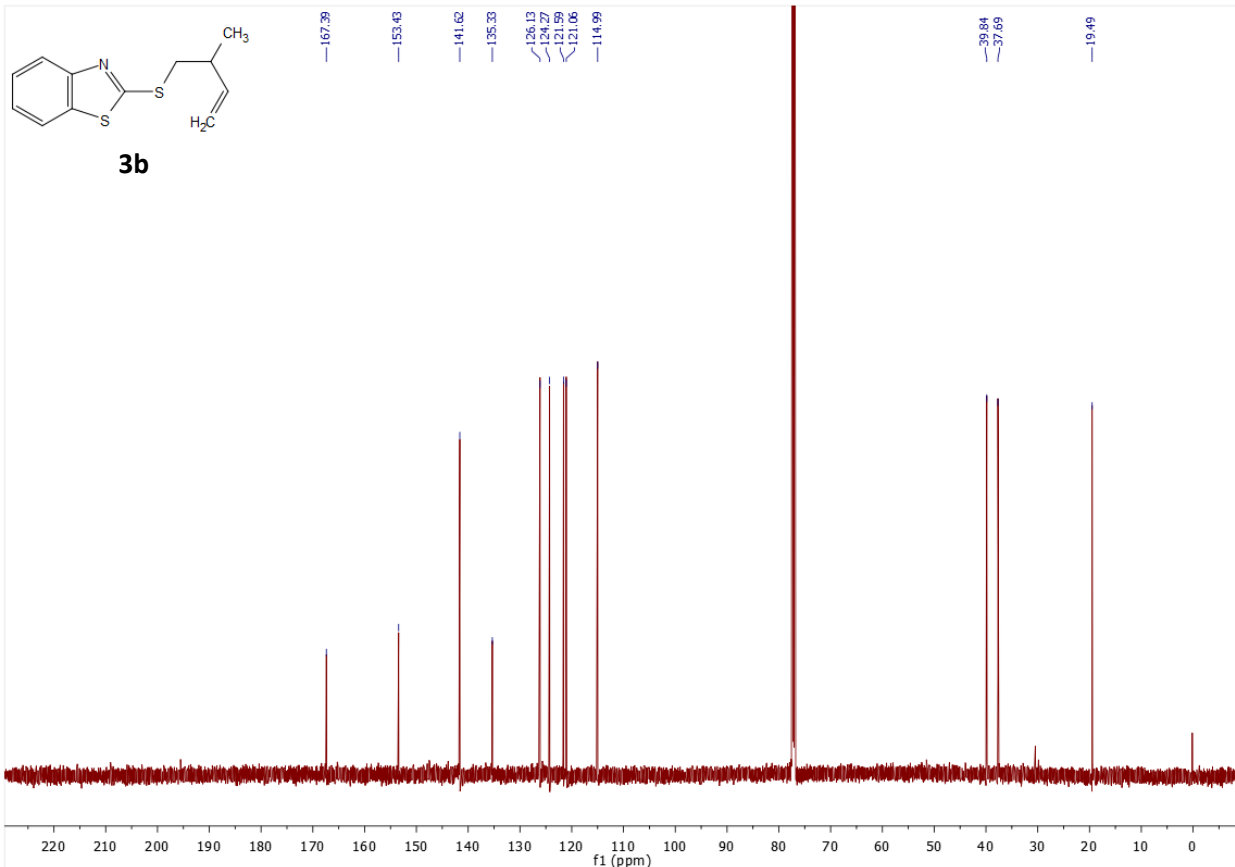

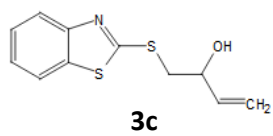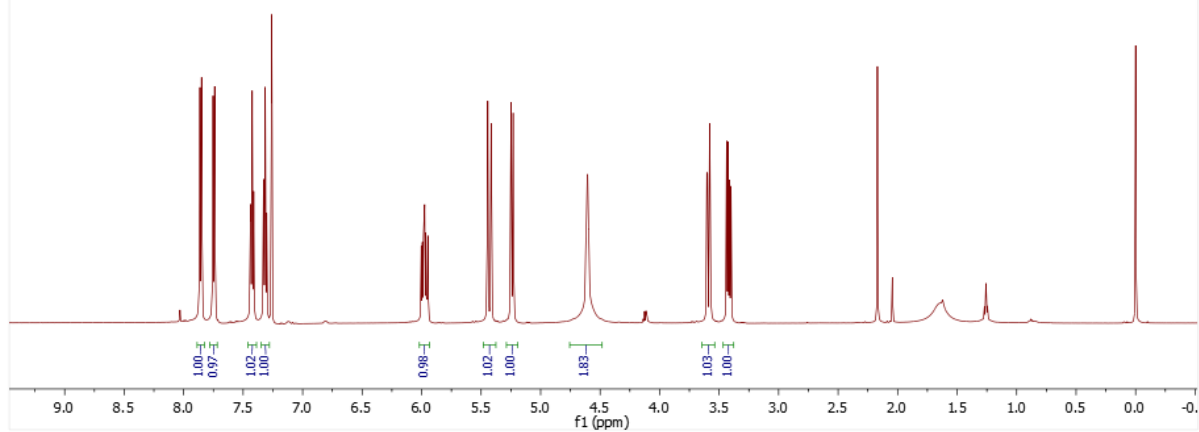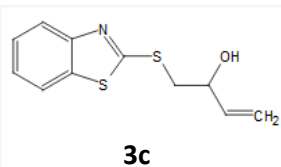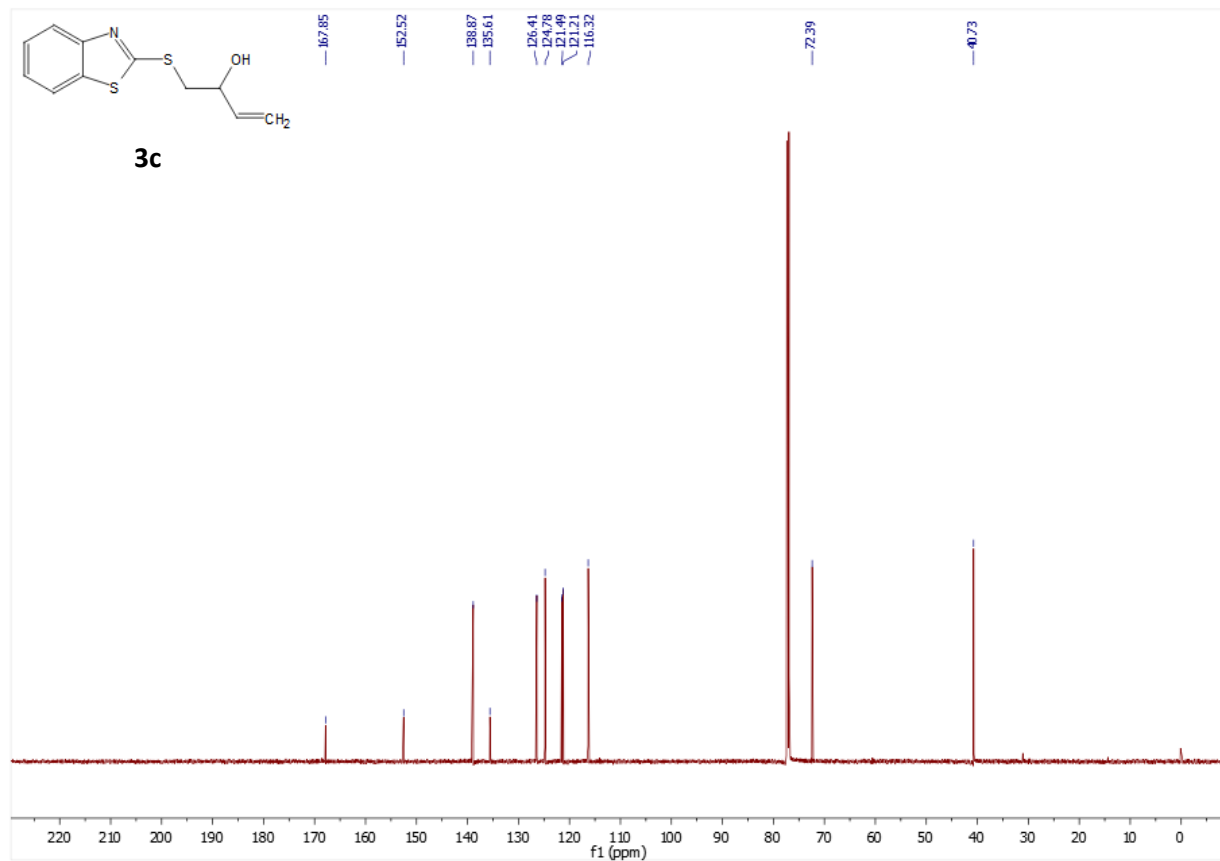



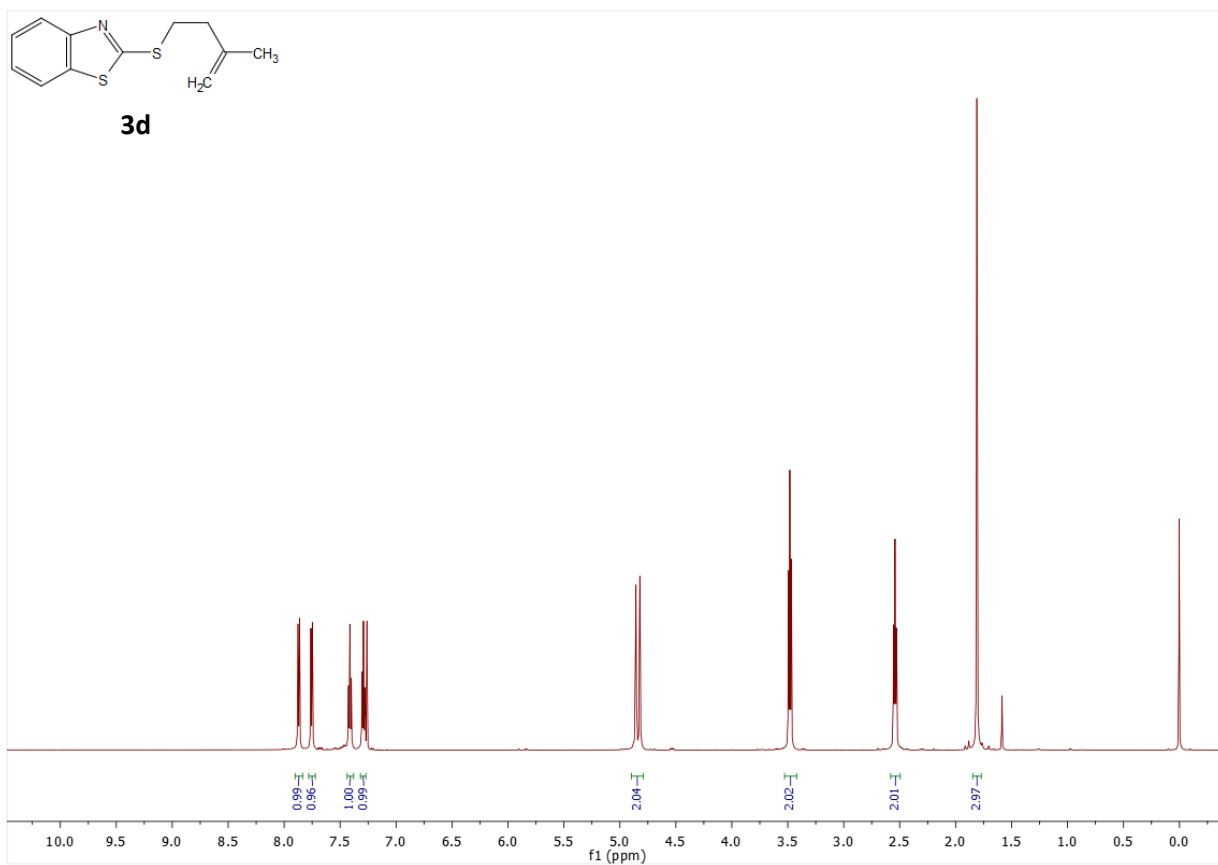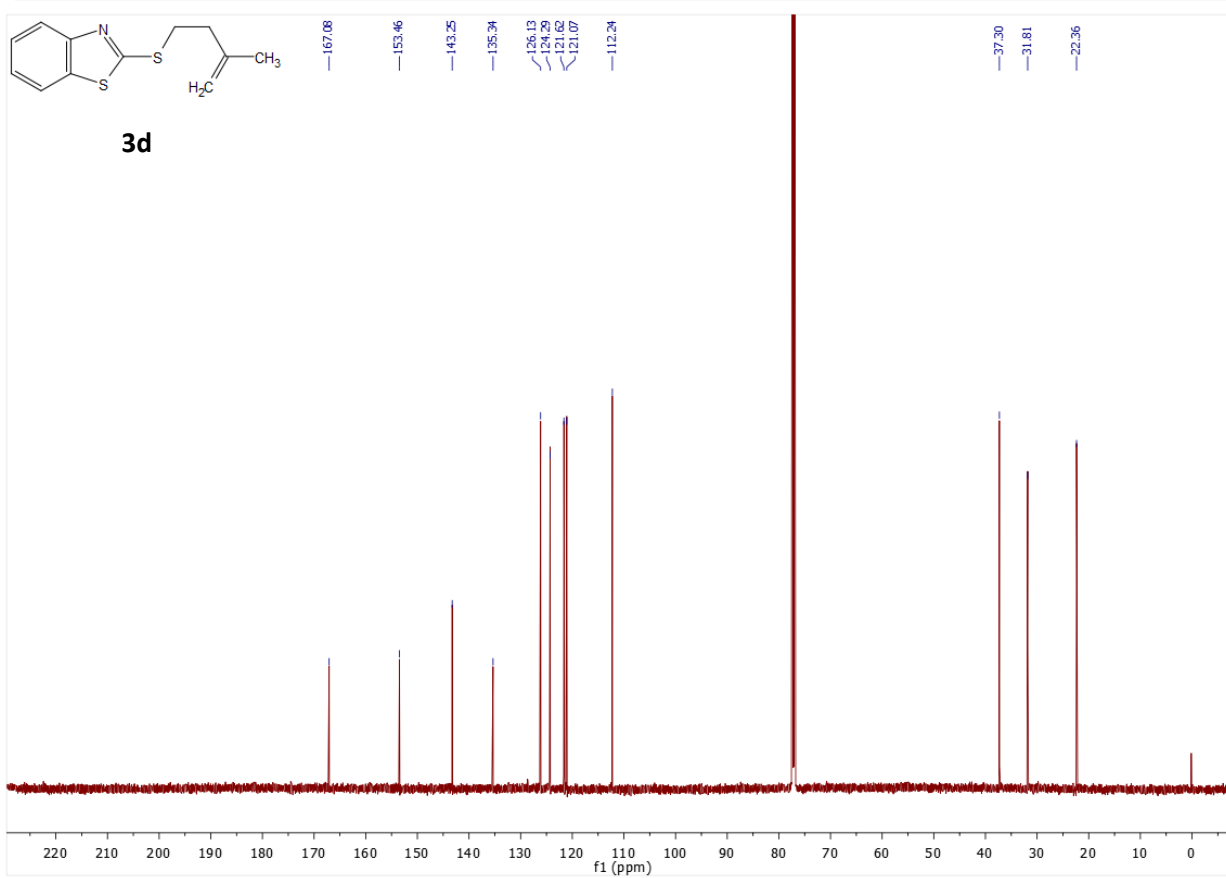

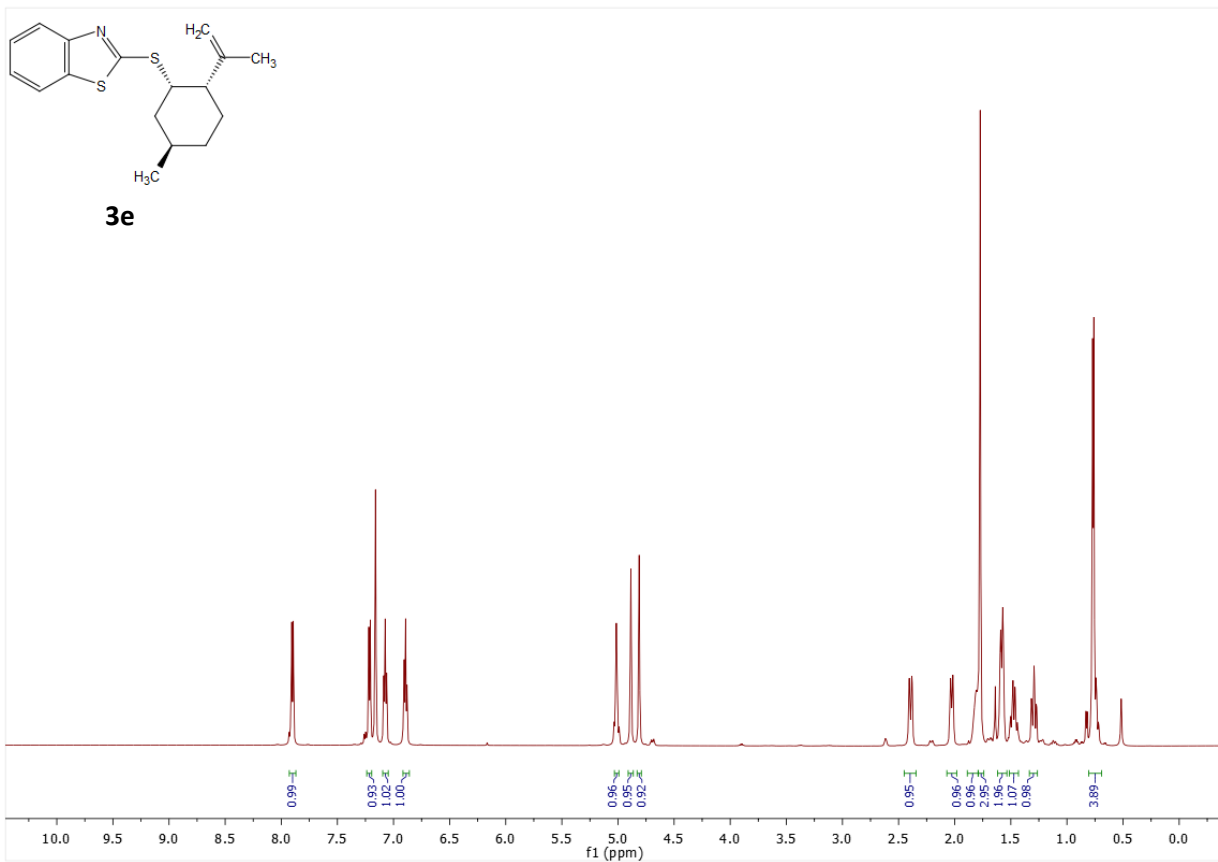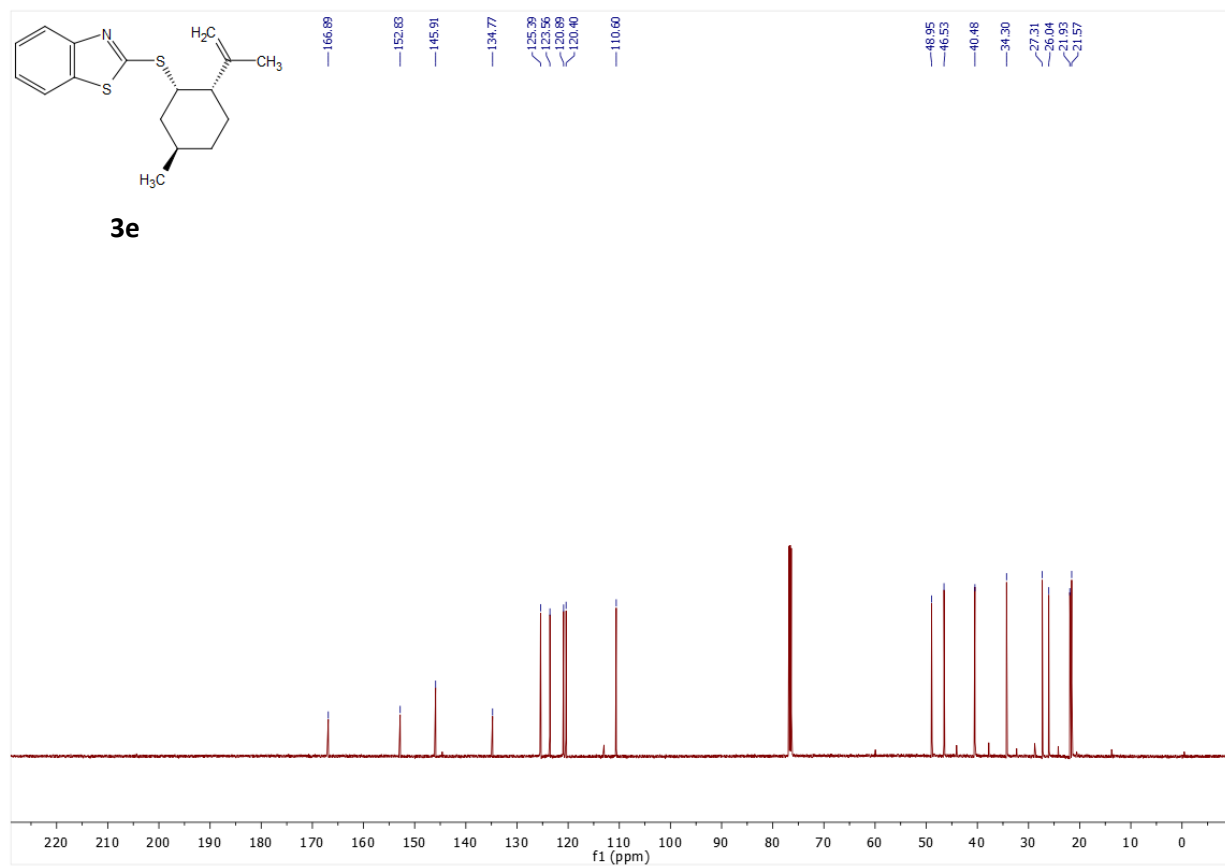

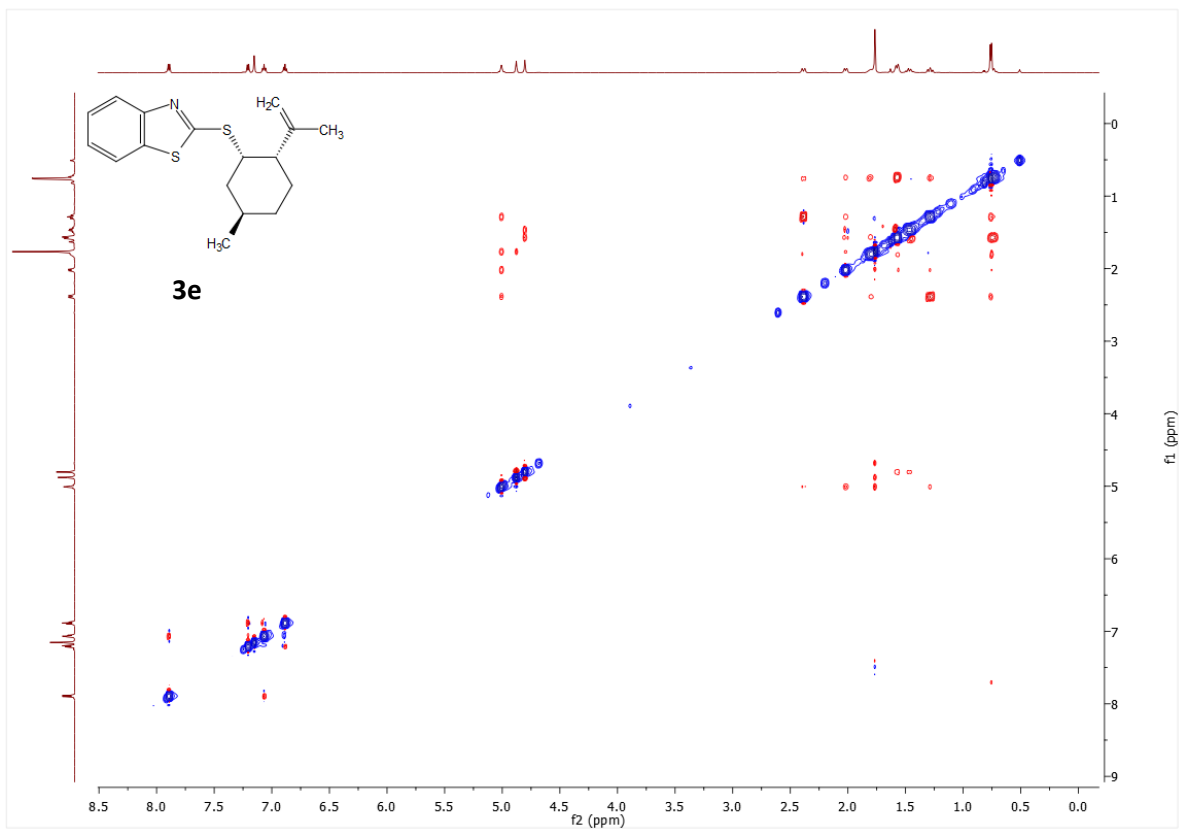

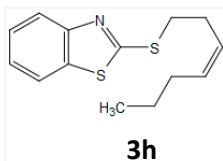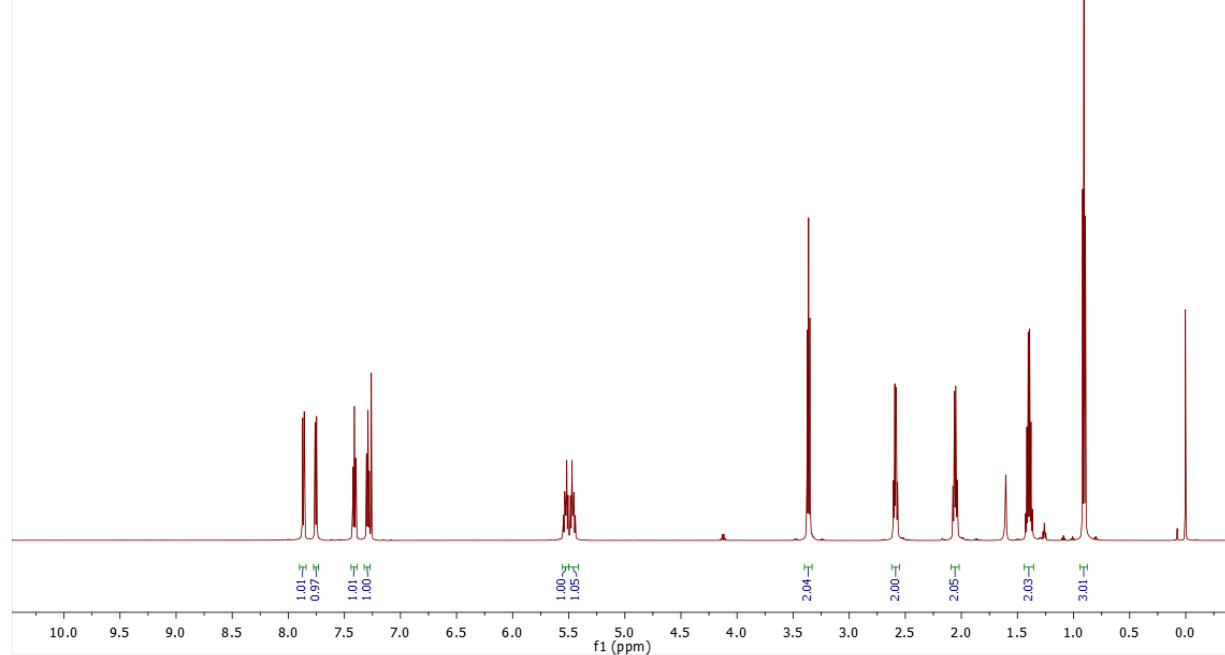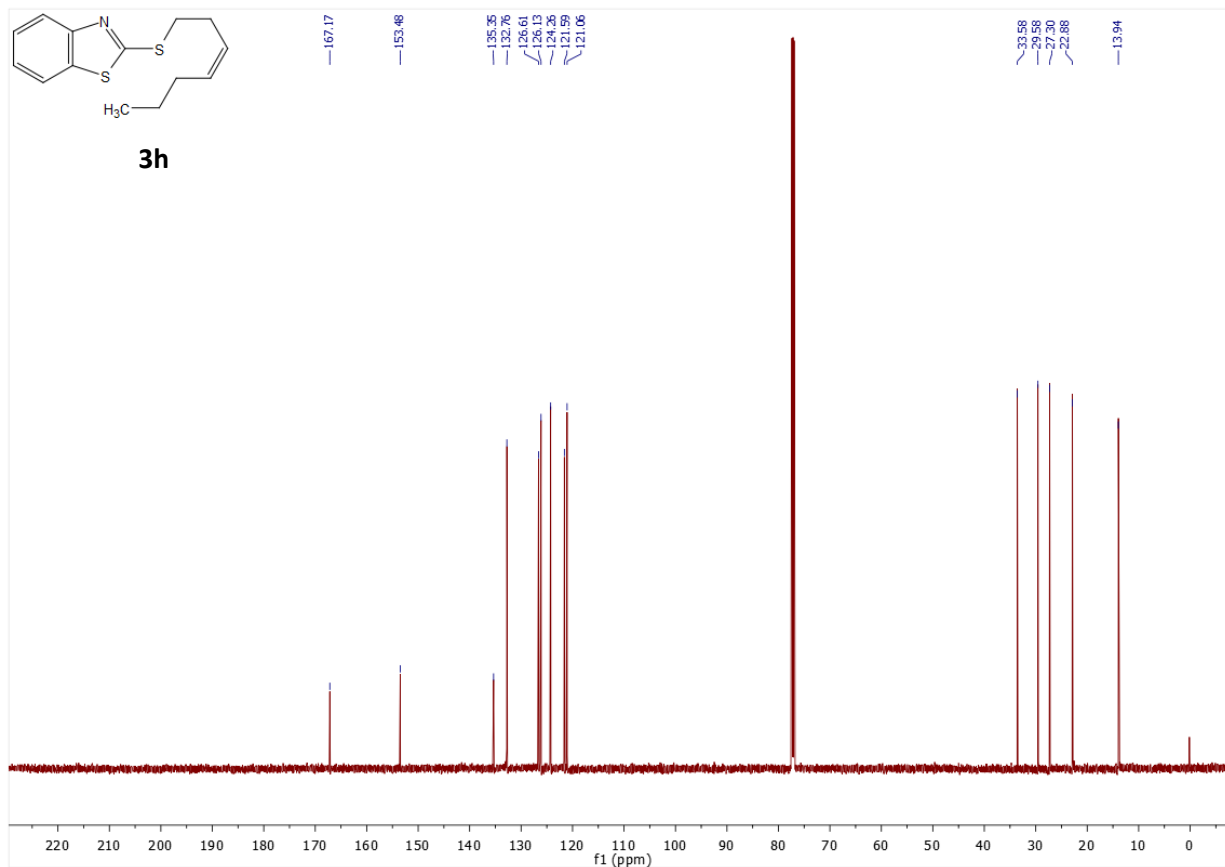

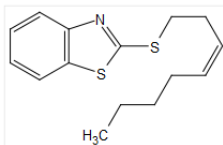

**3i**

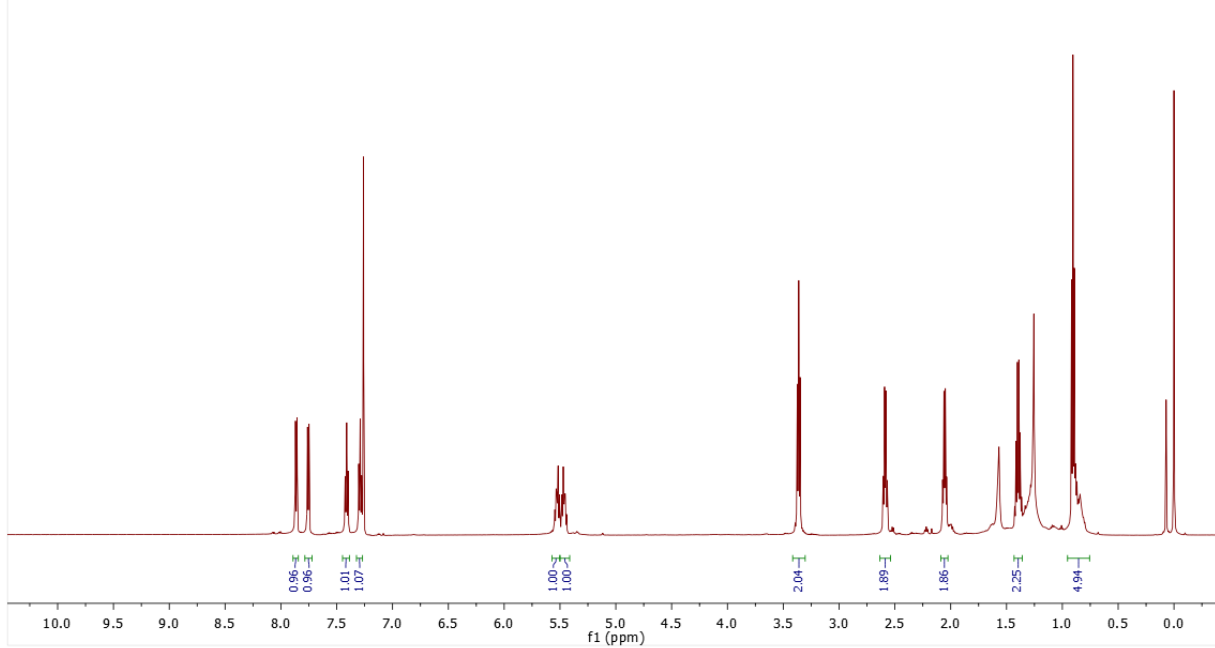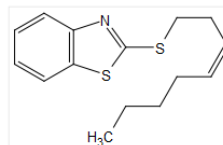

**3i**

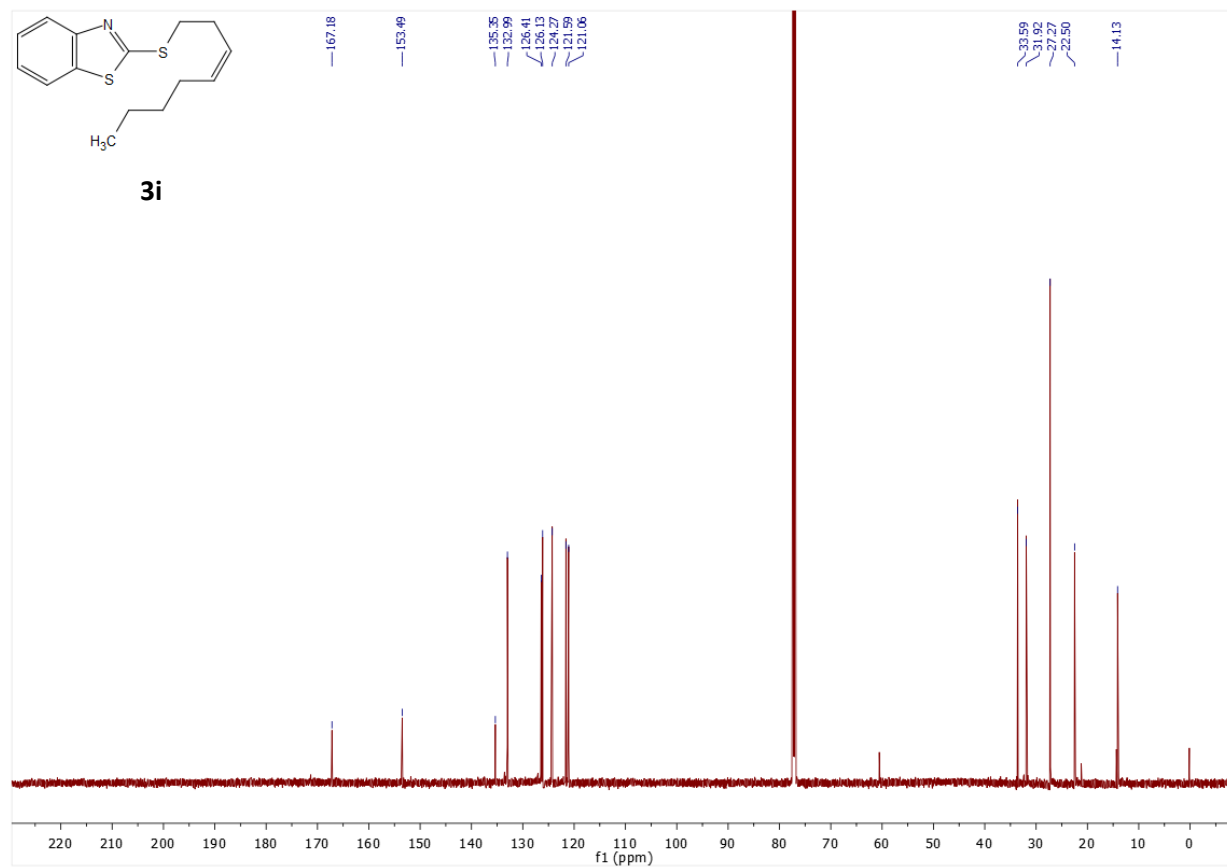

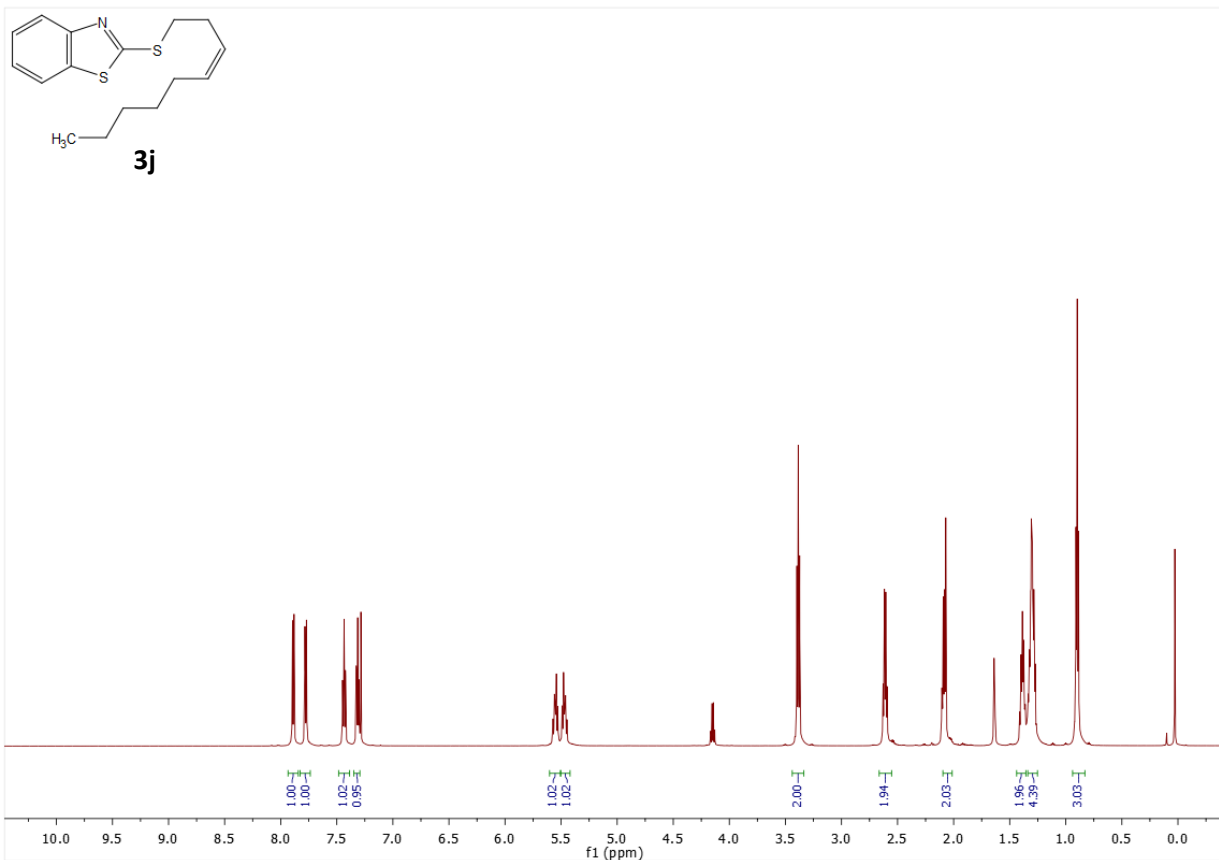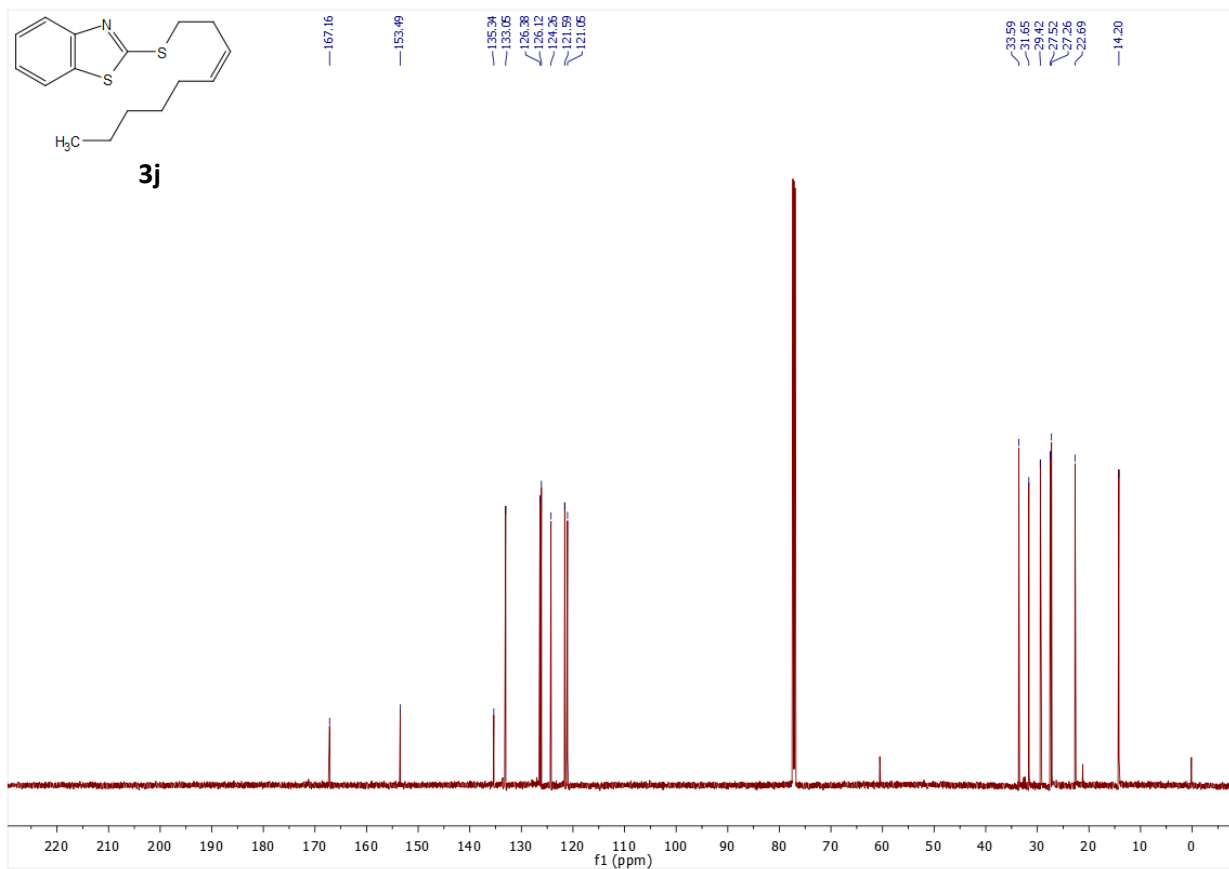

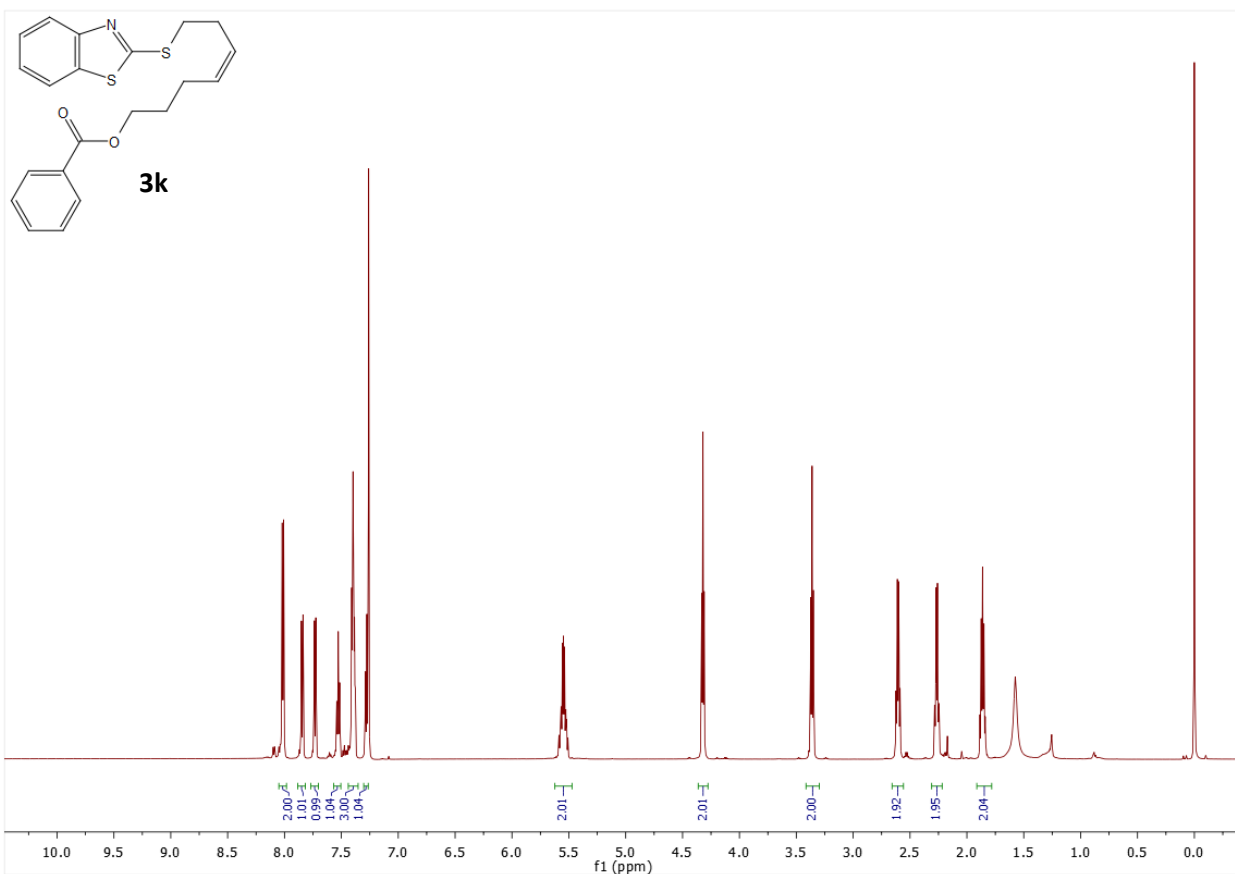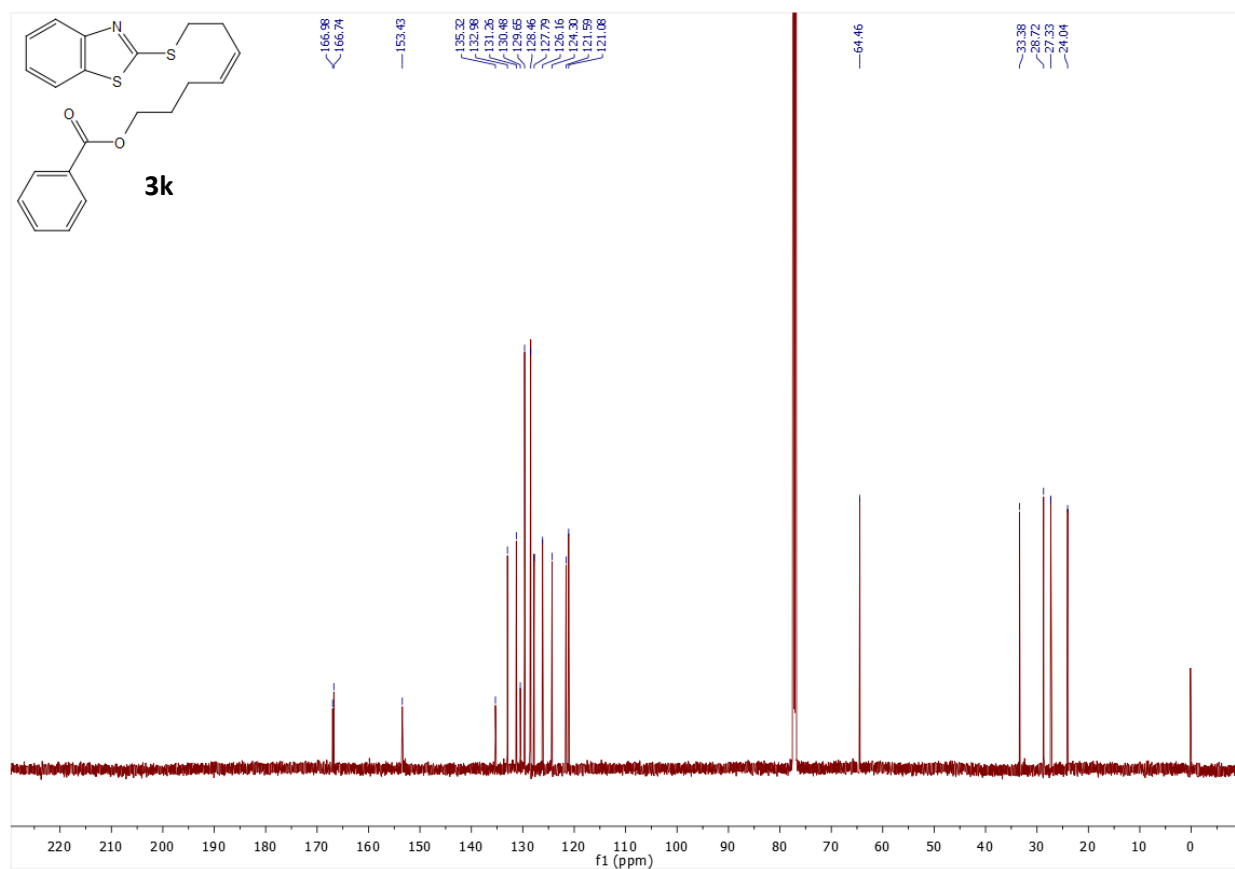

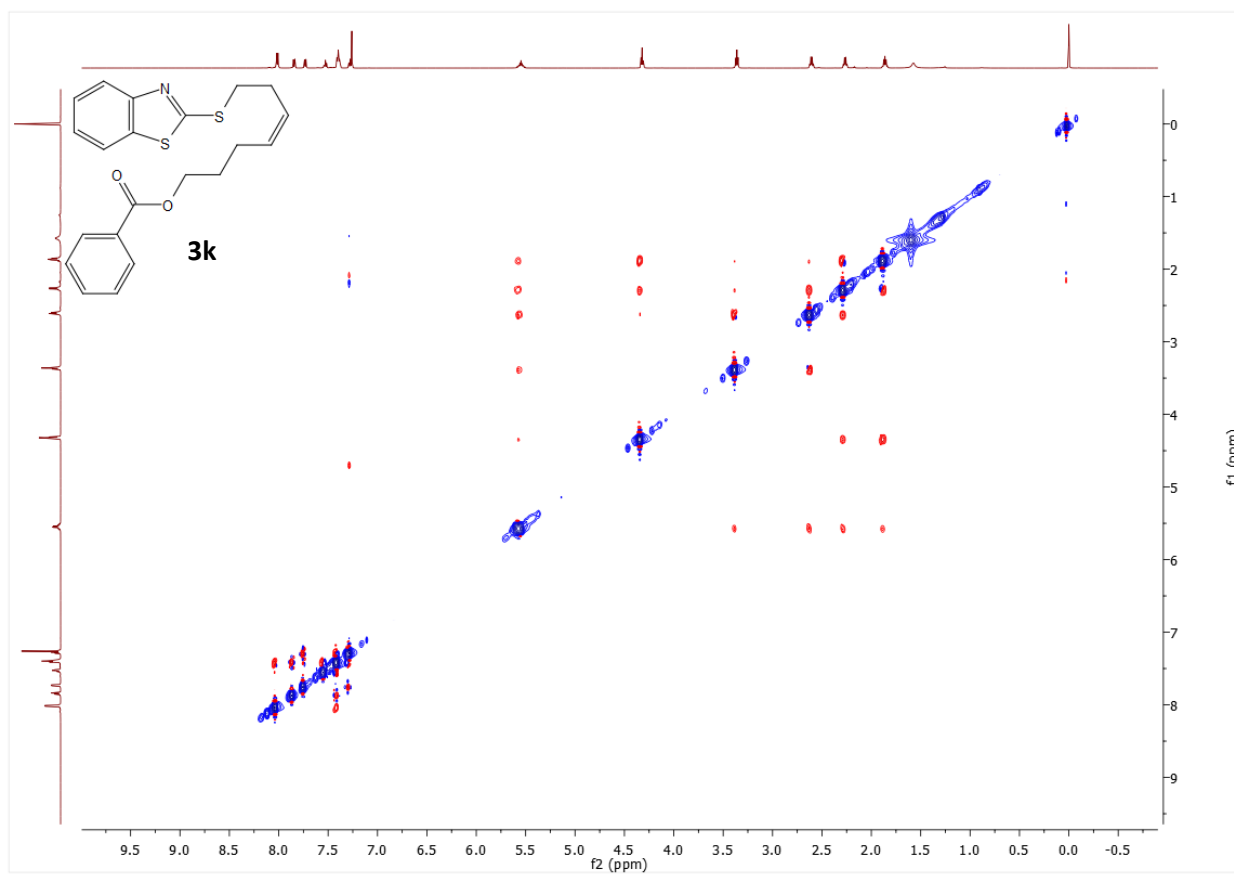



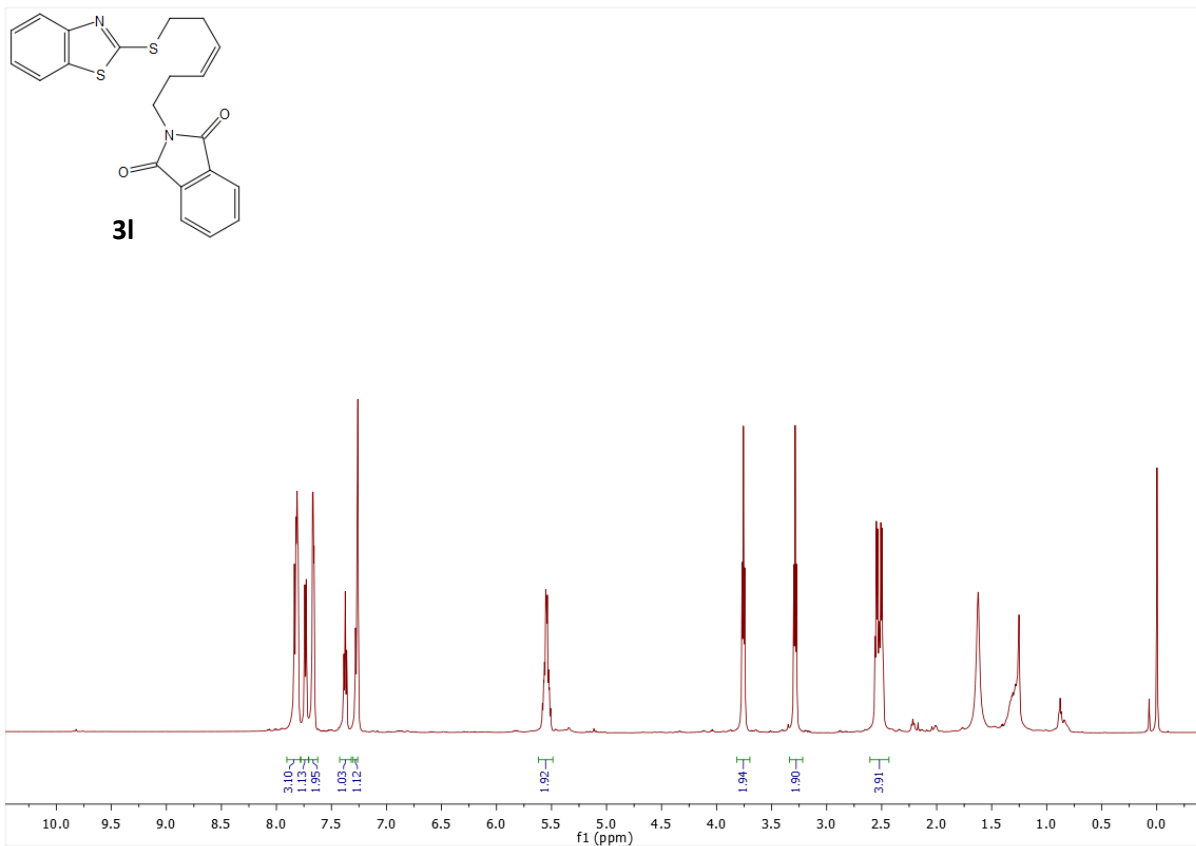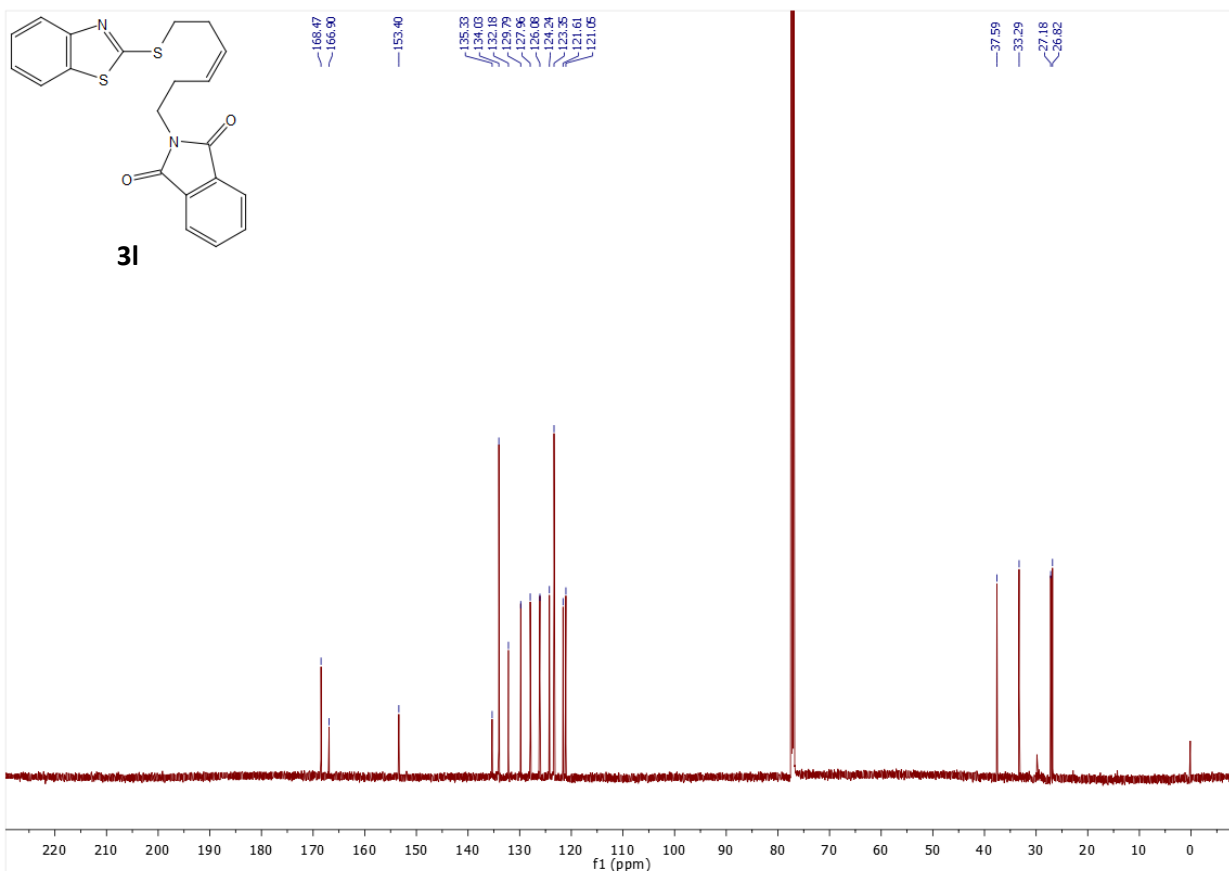

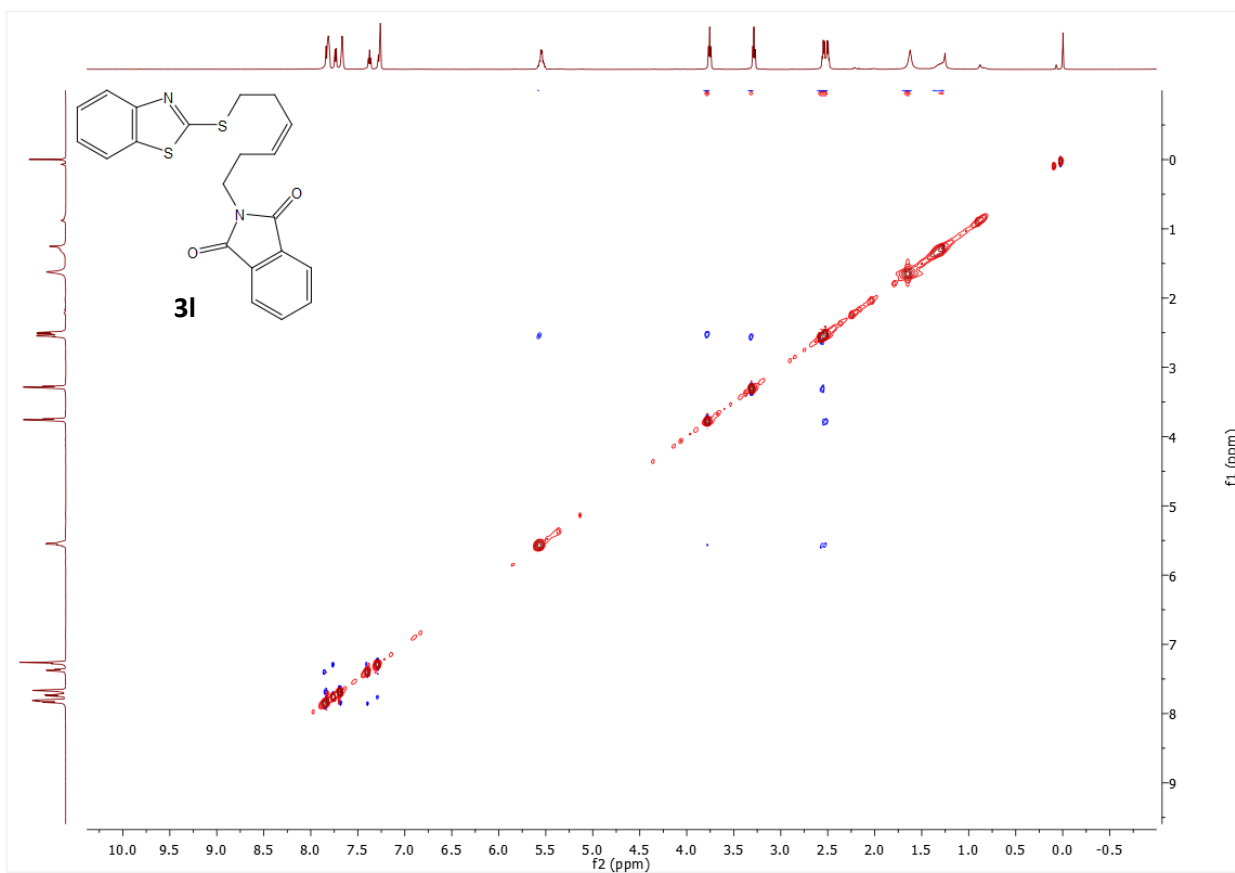

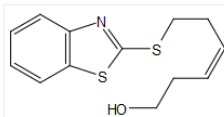

**3m**

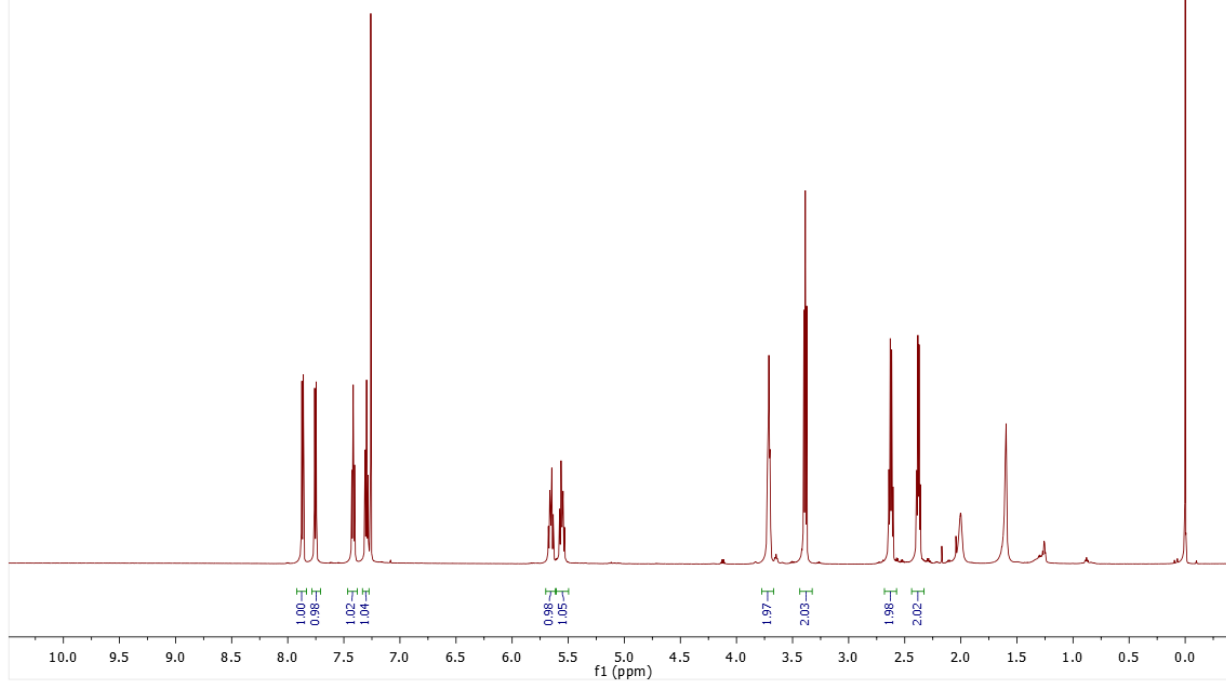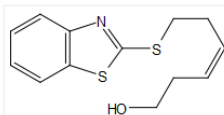

**3m**

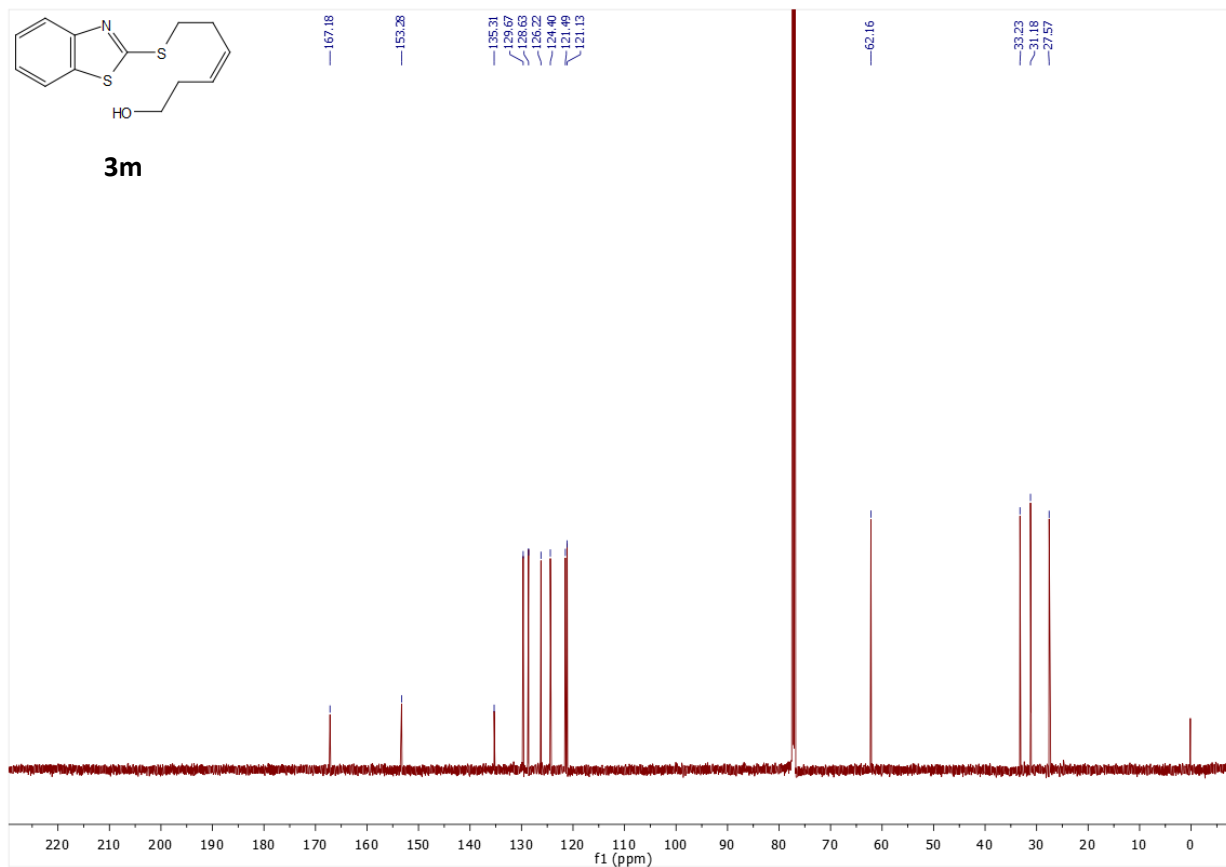

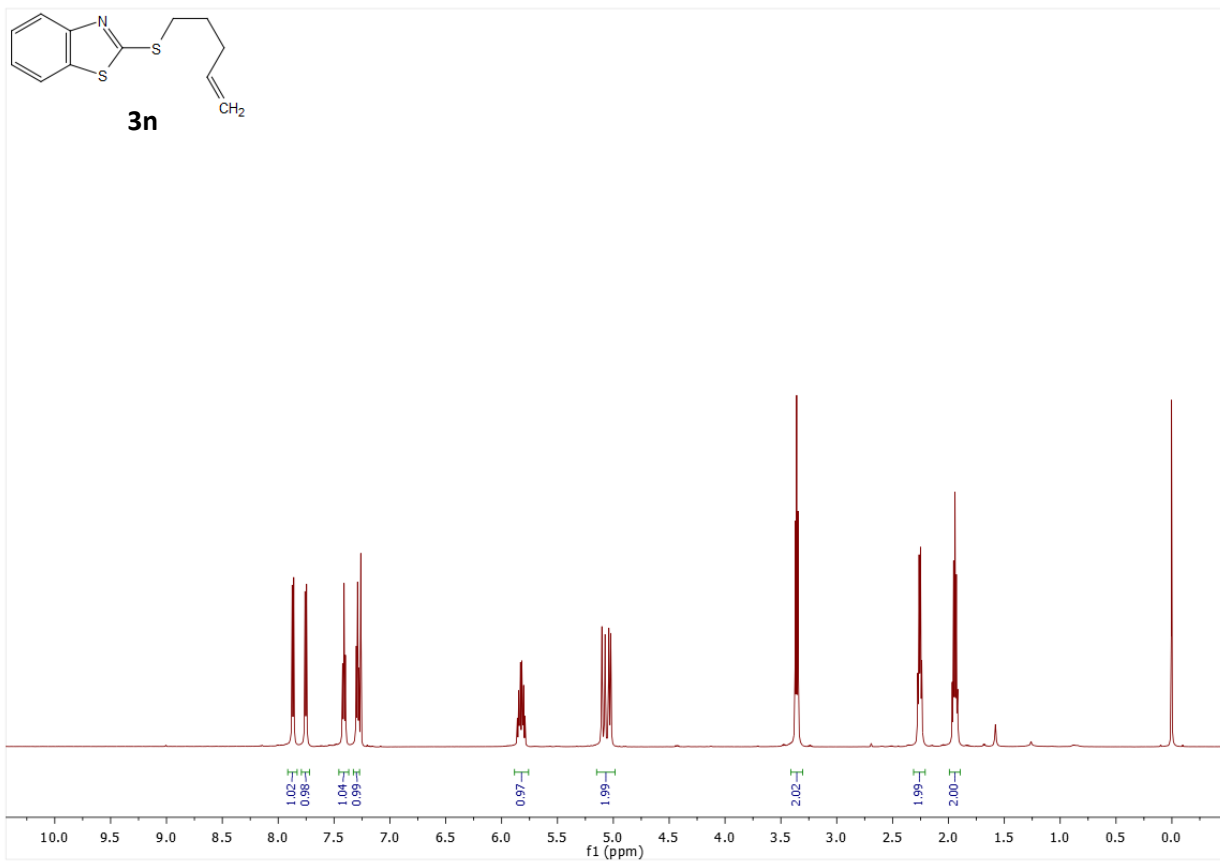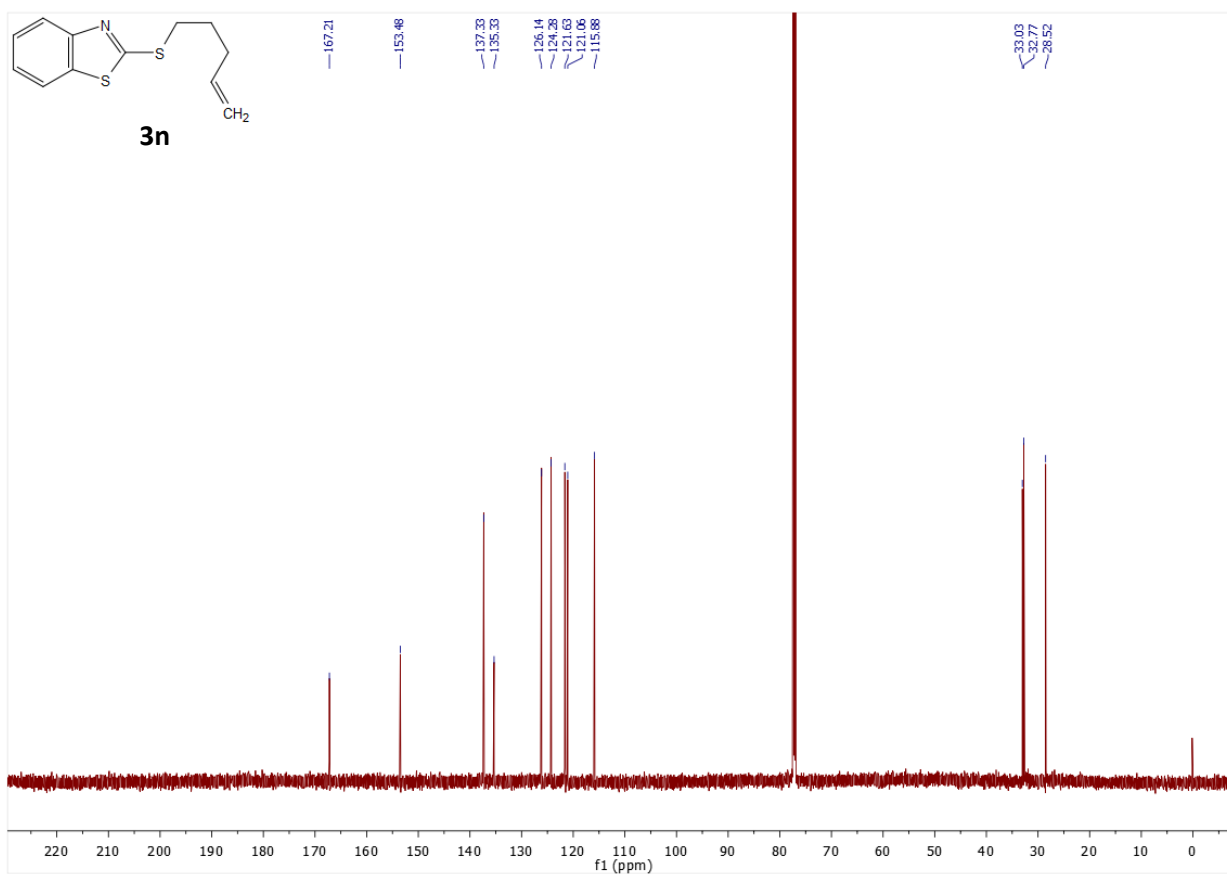

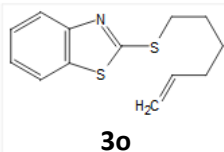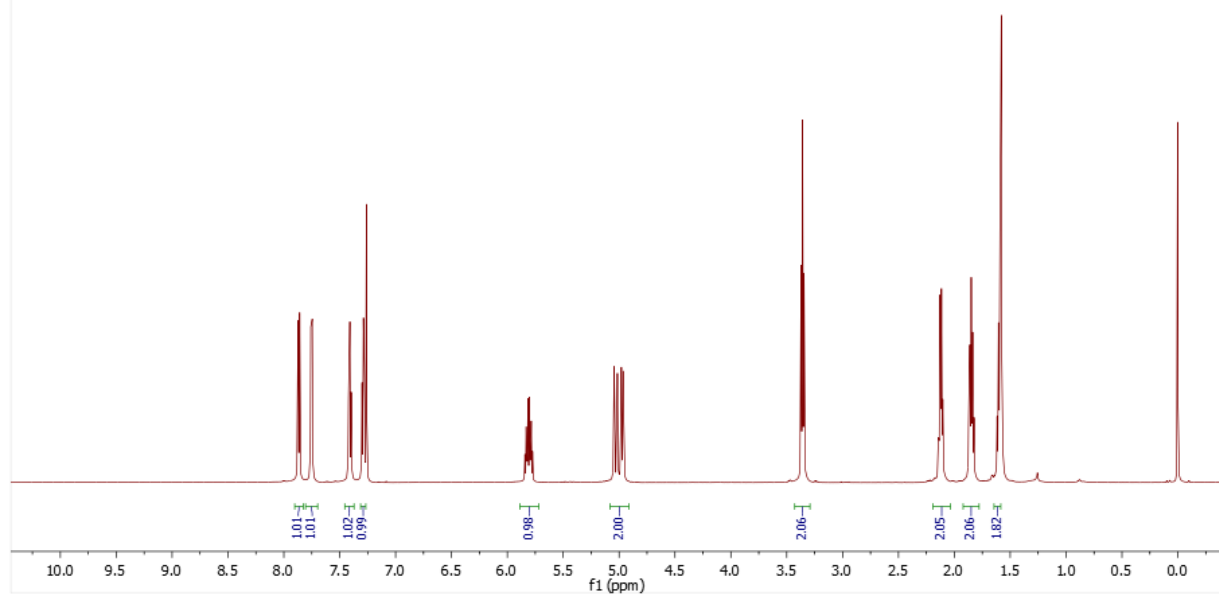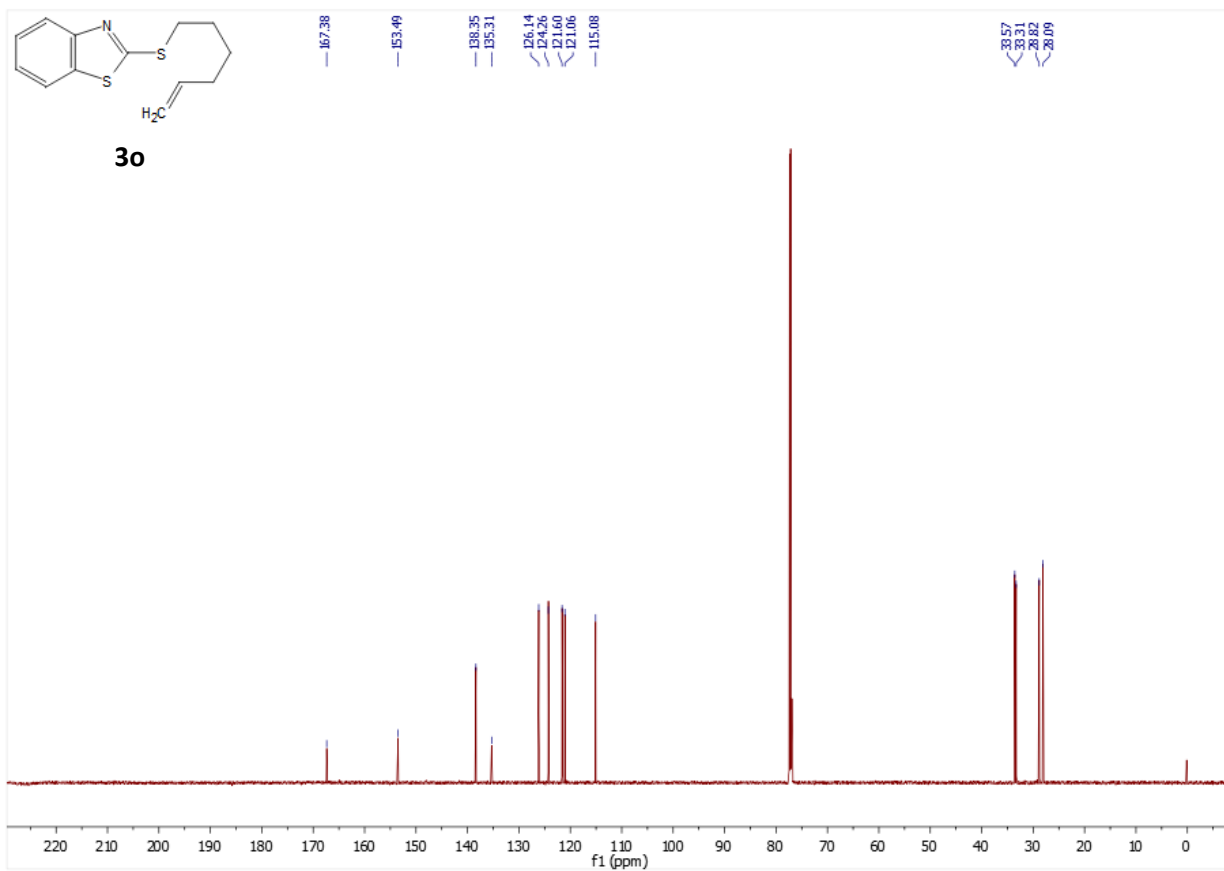

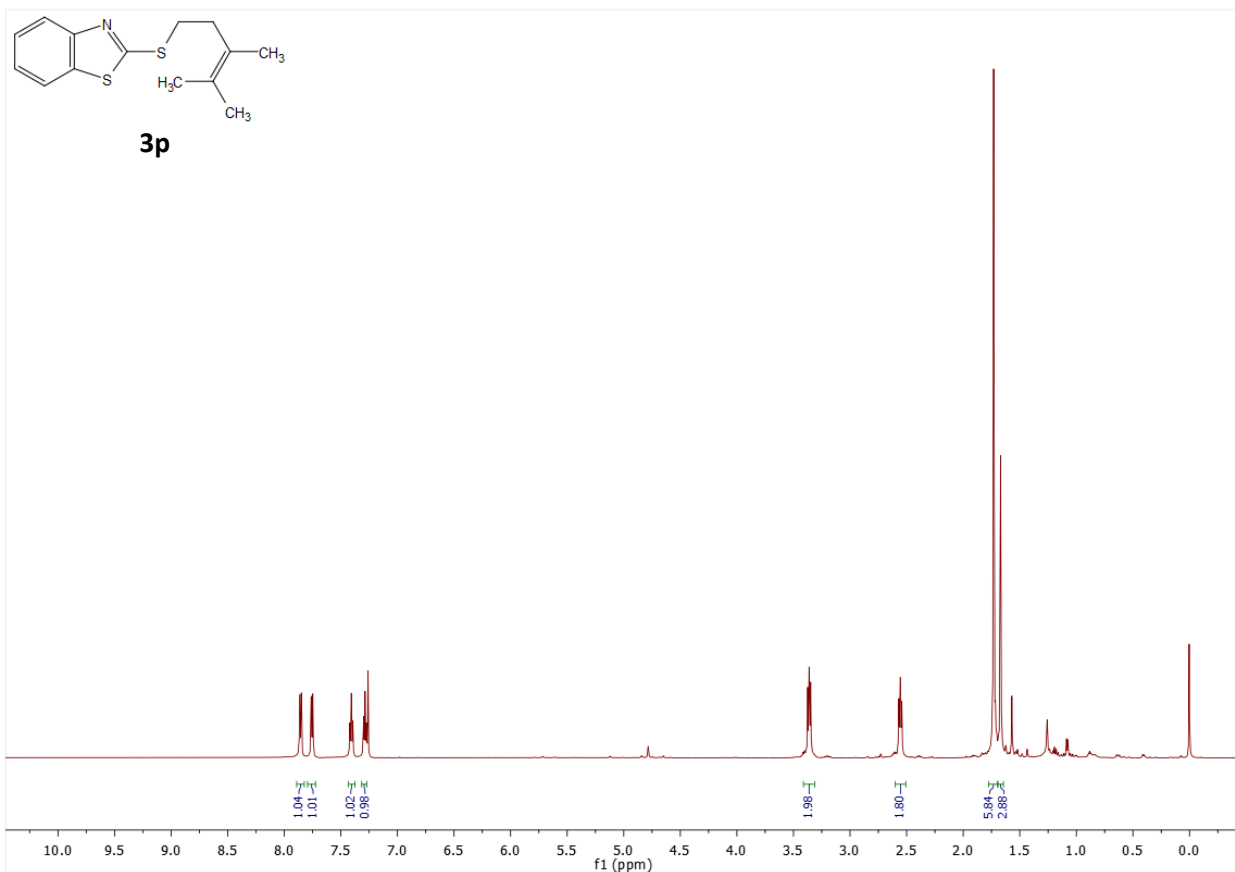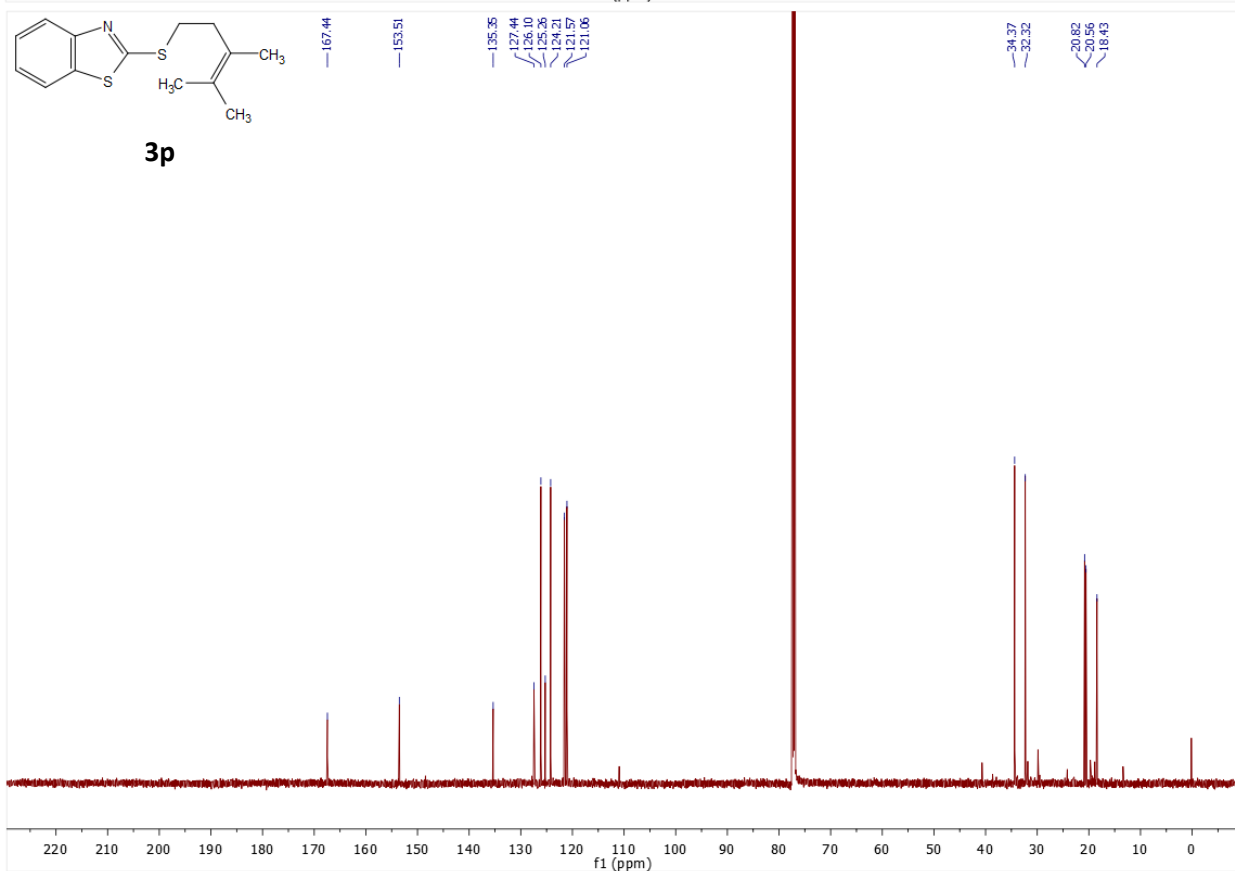

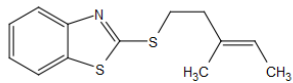

**3q**

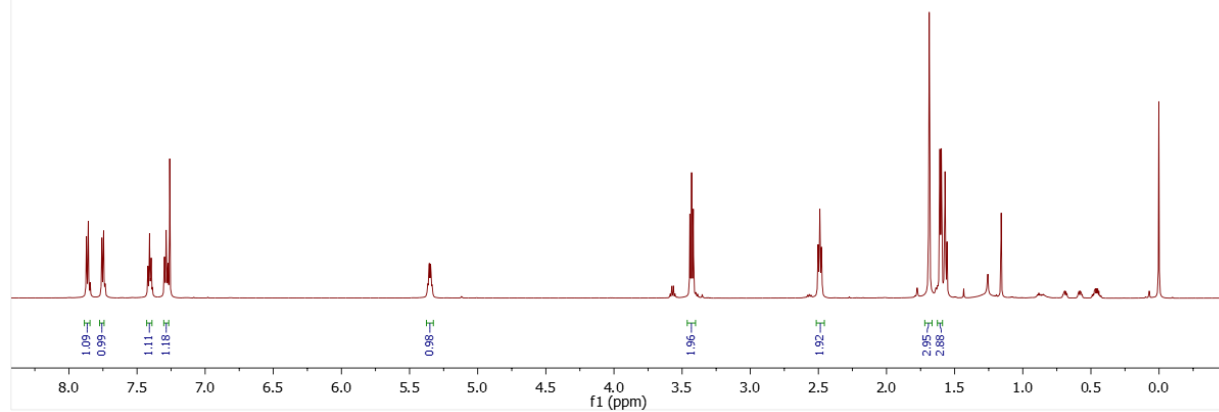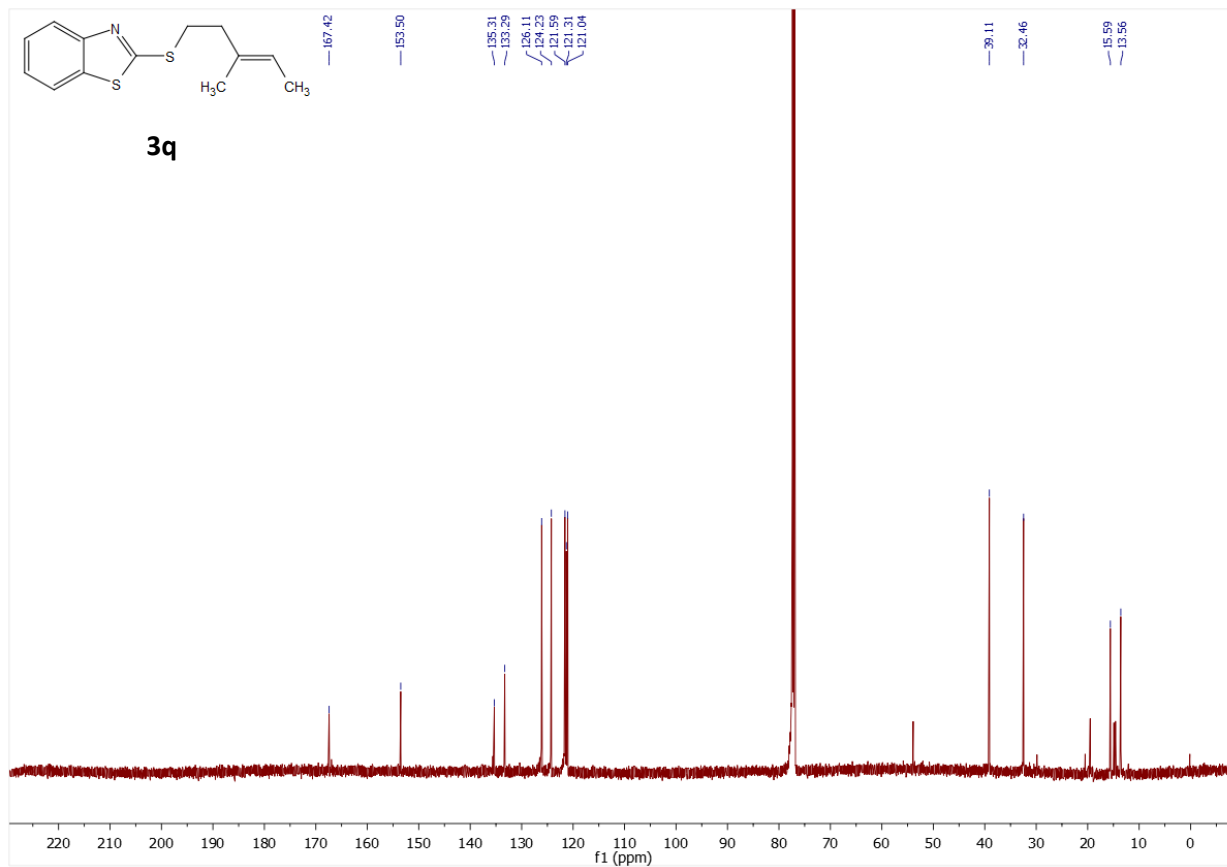

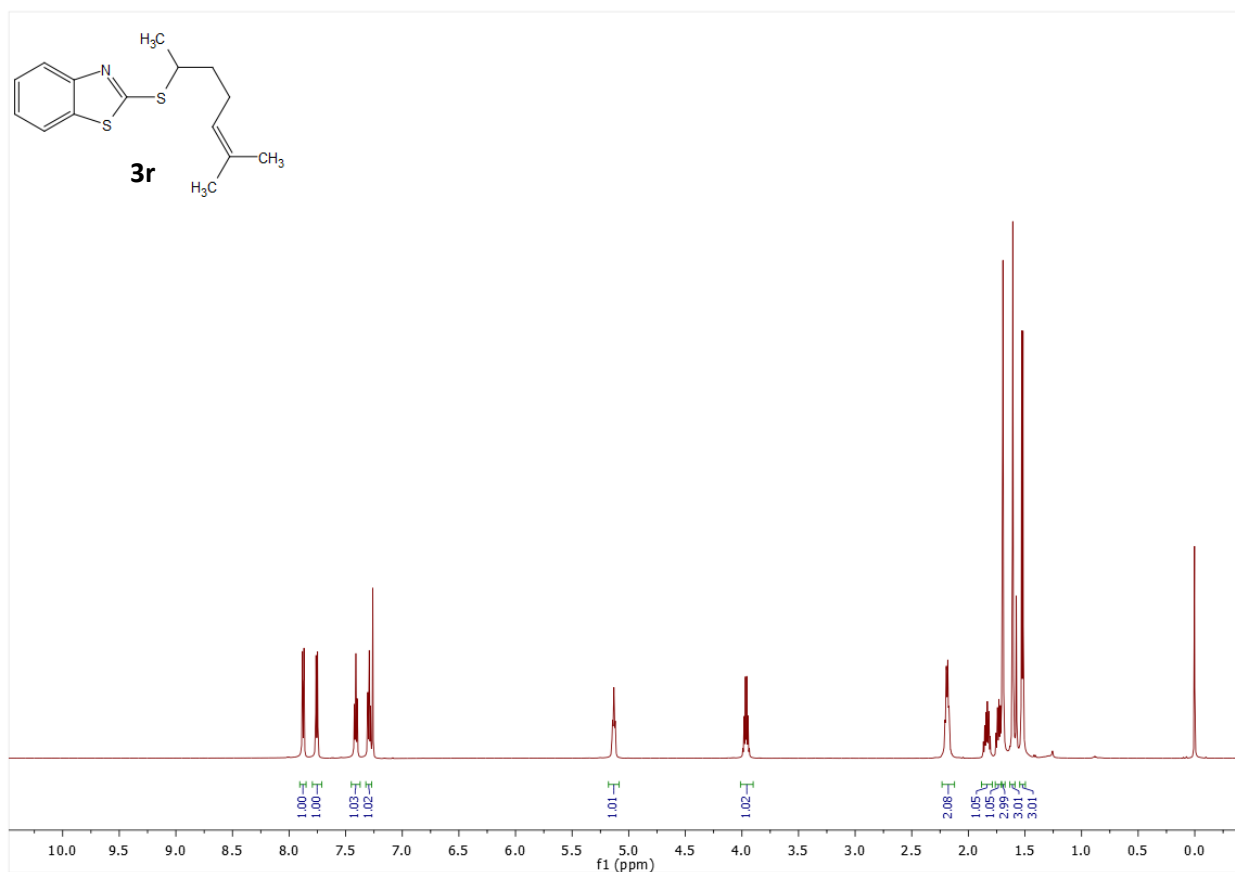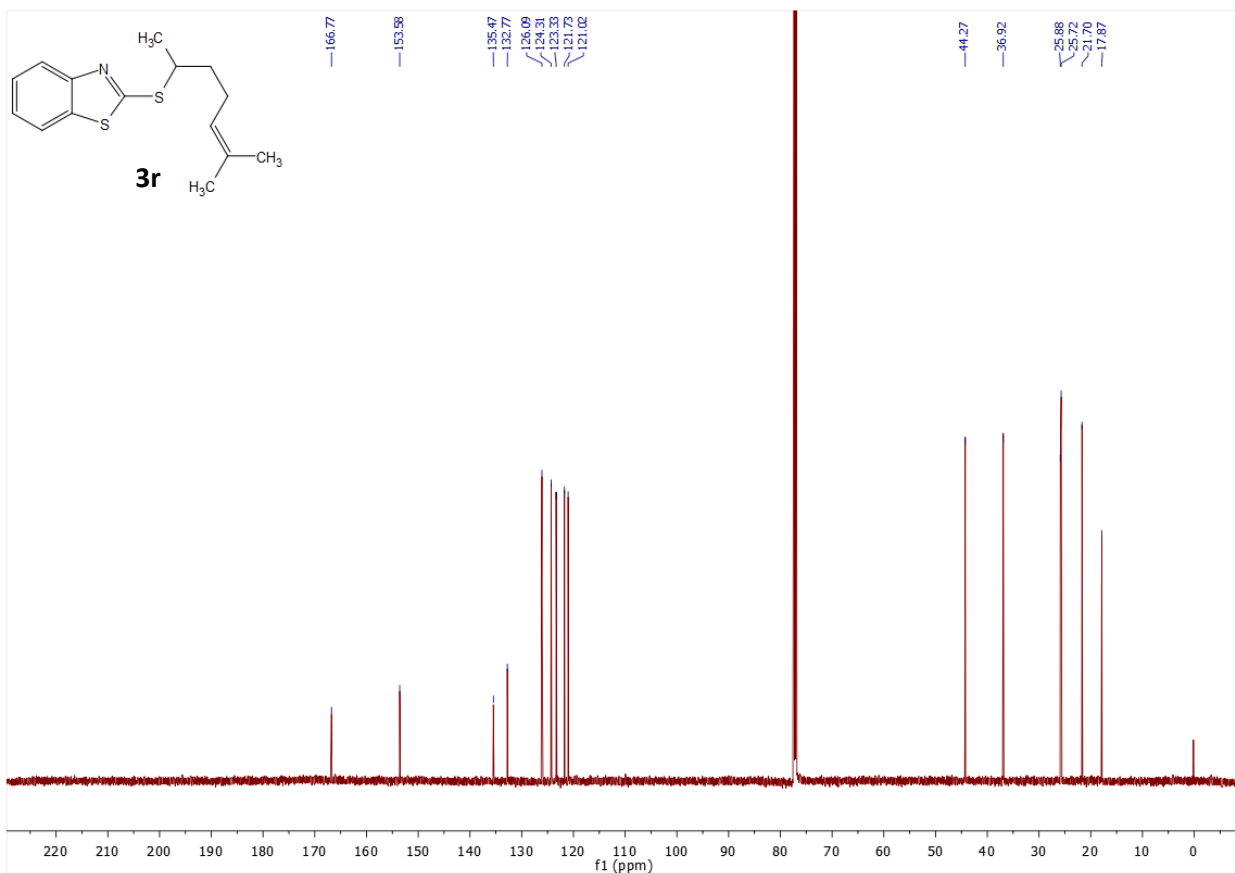



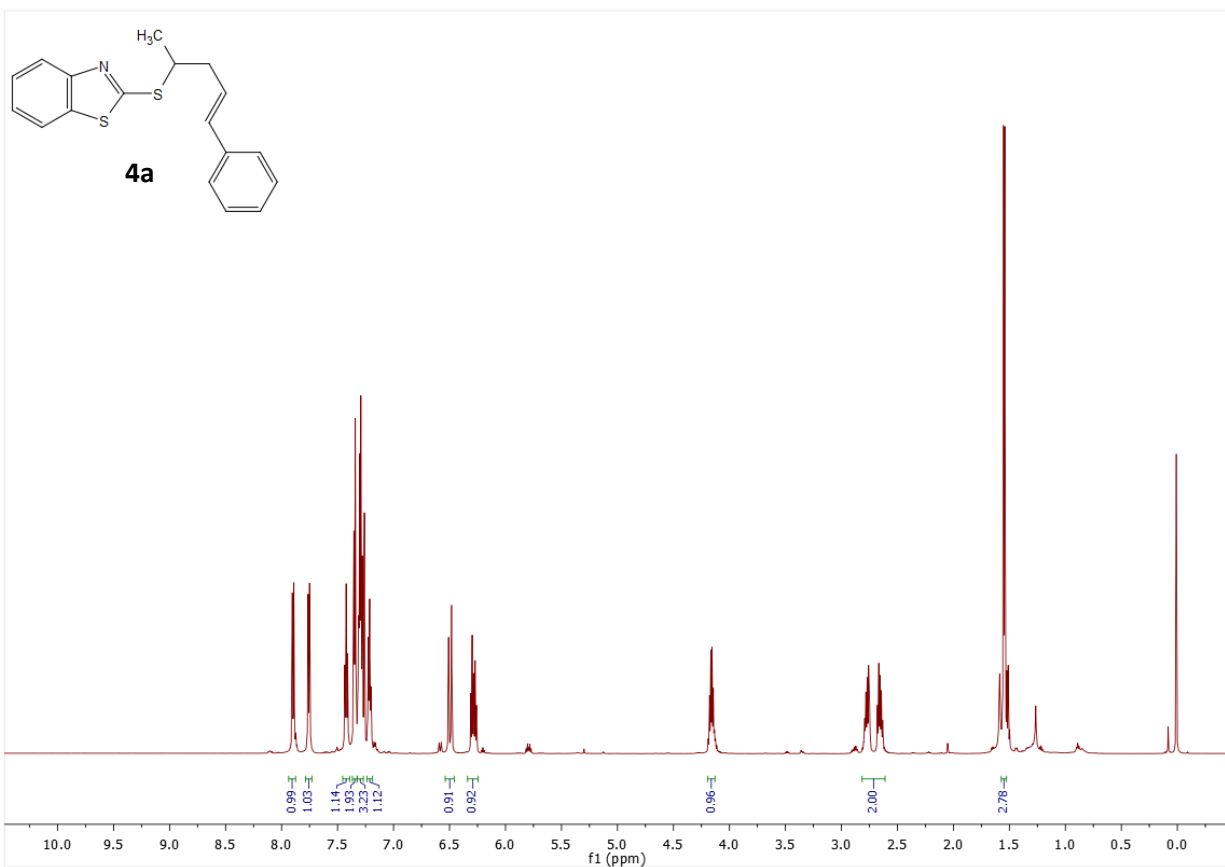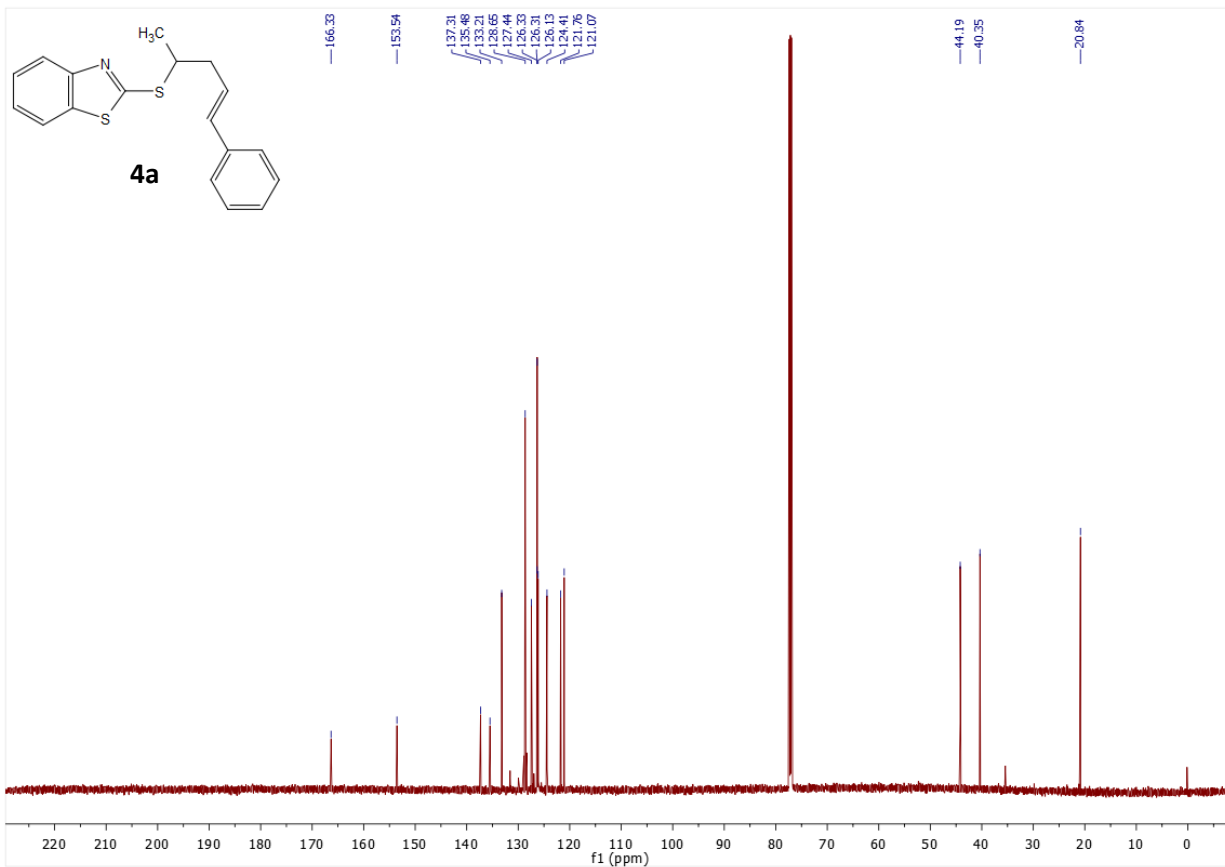

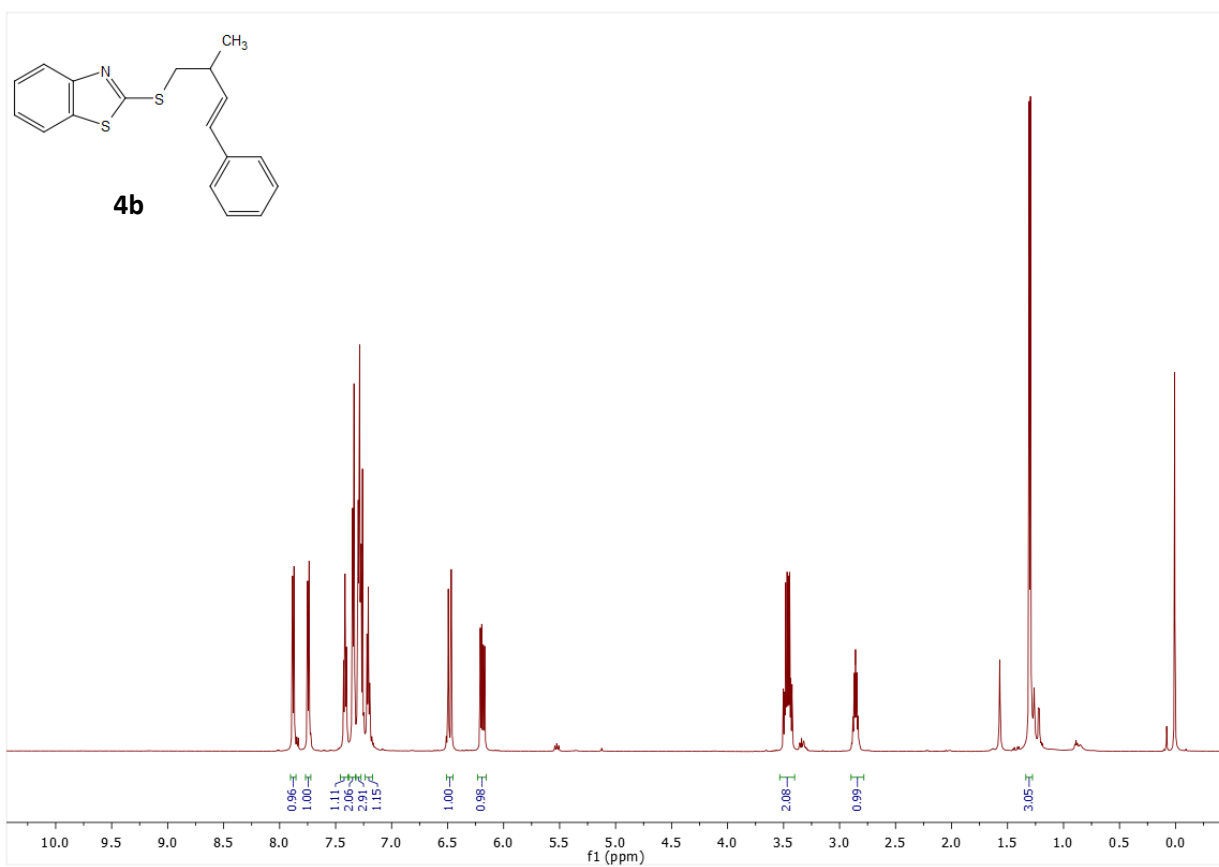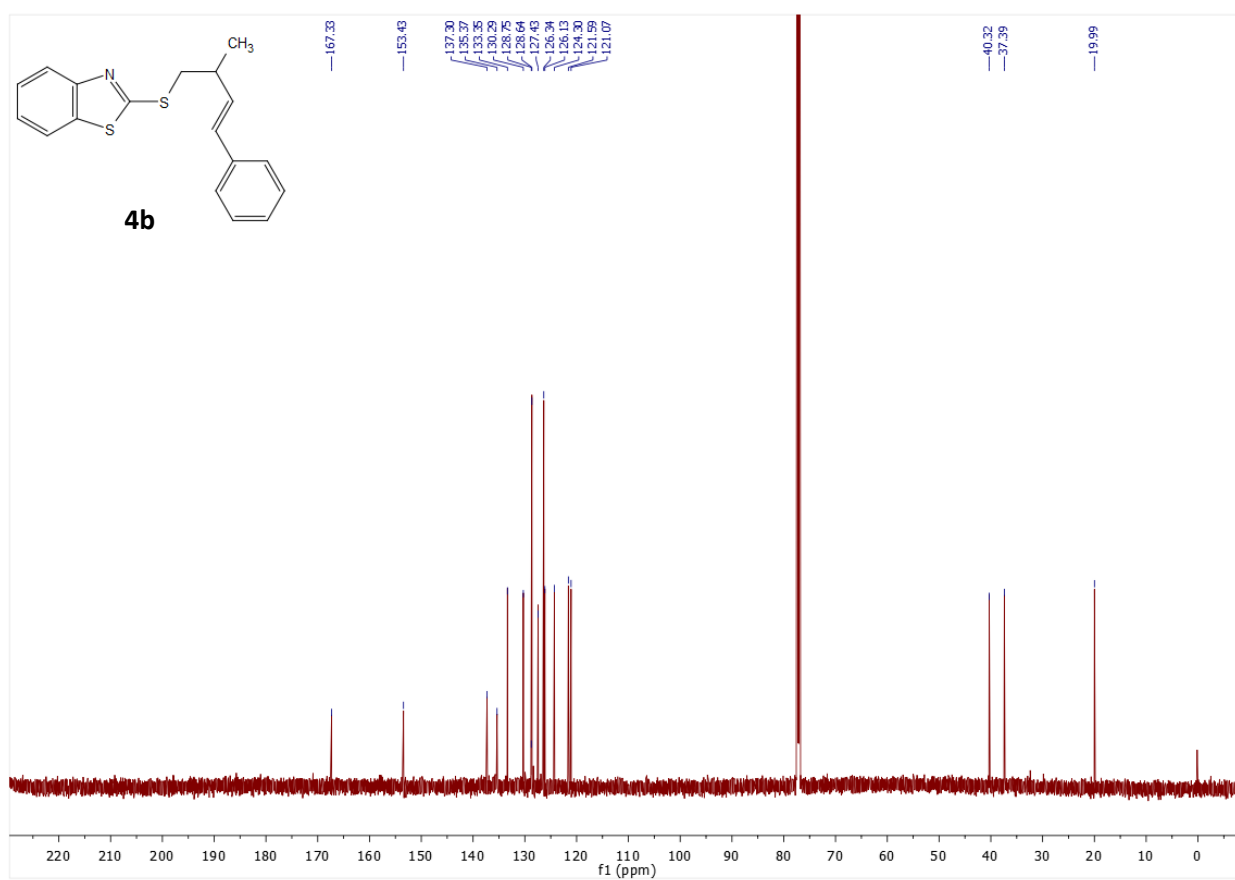

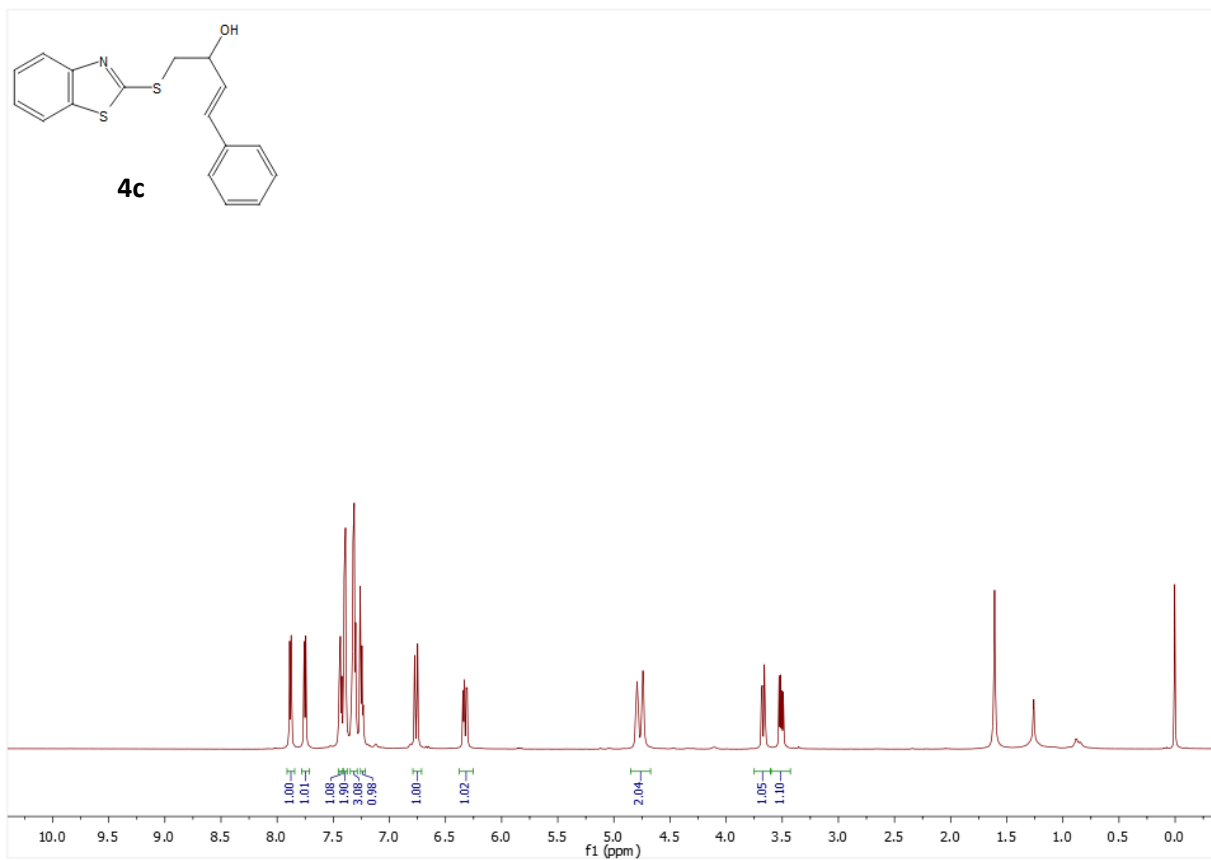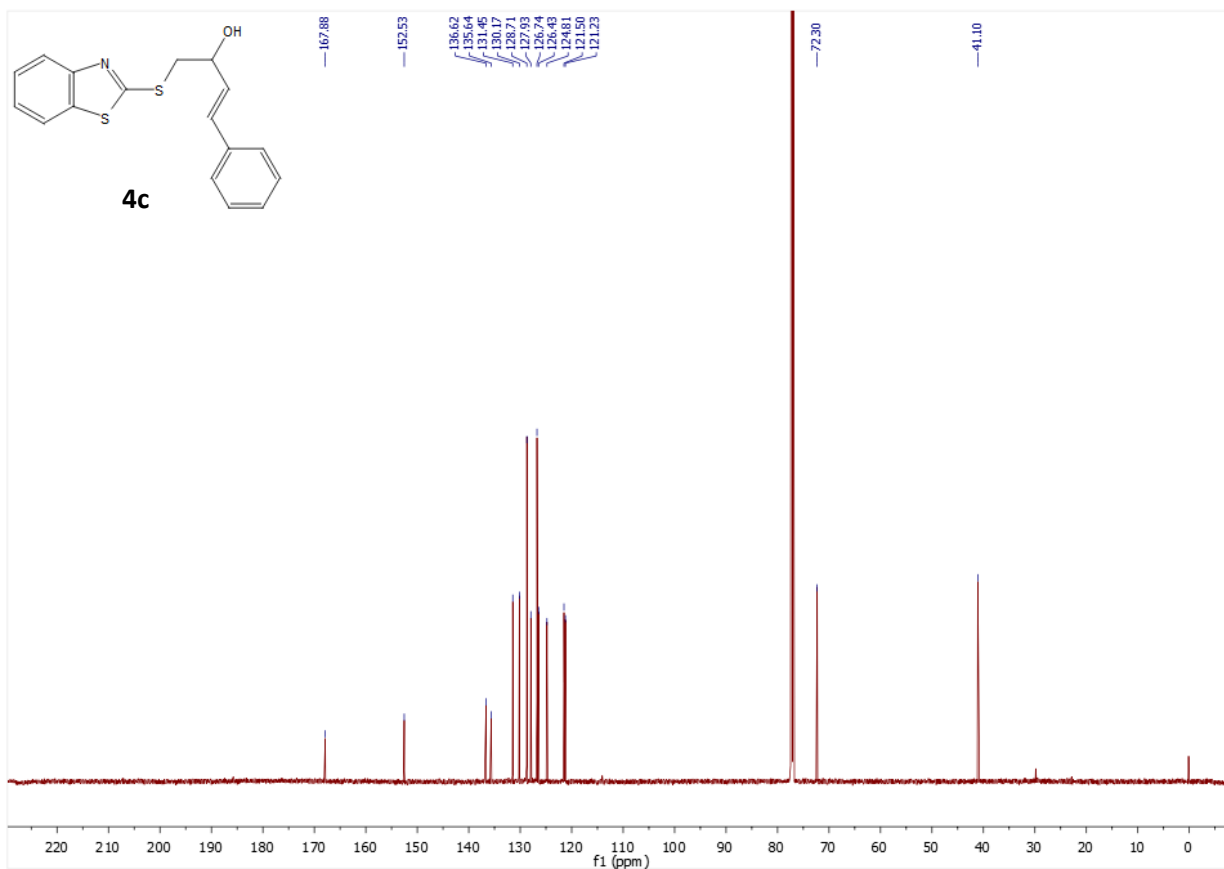

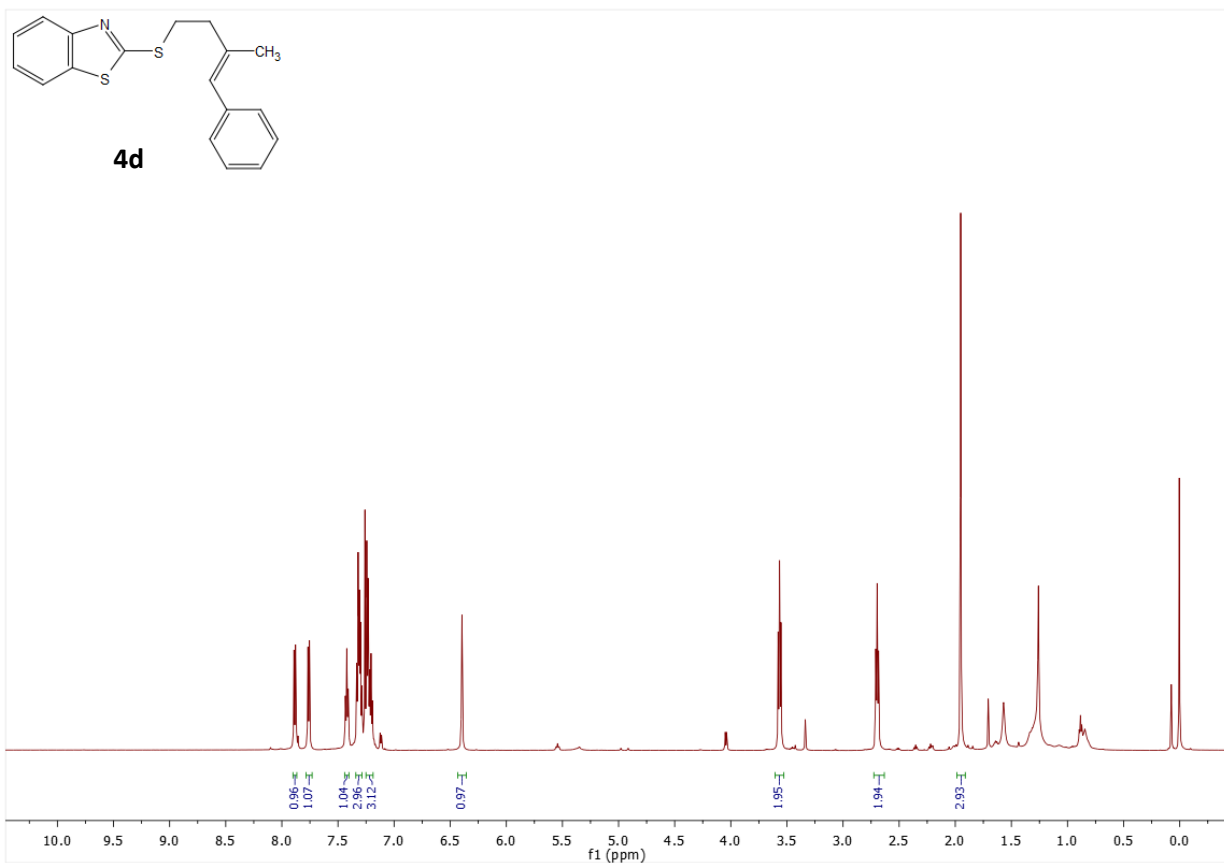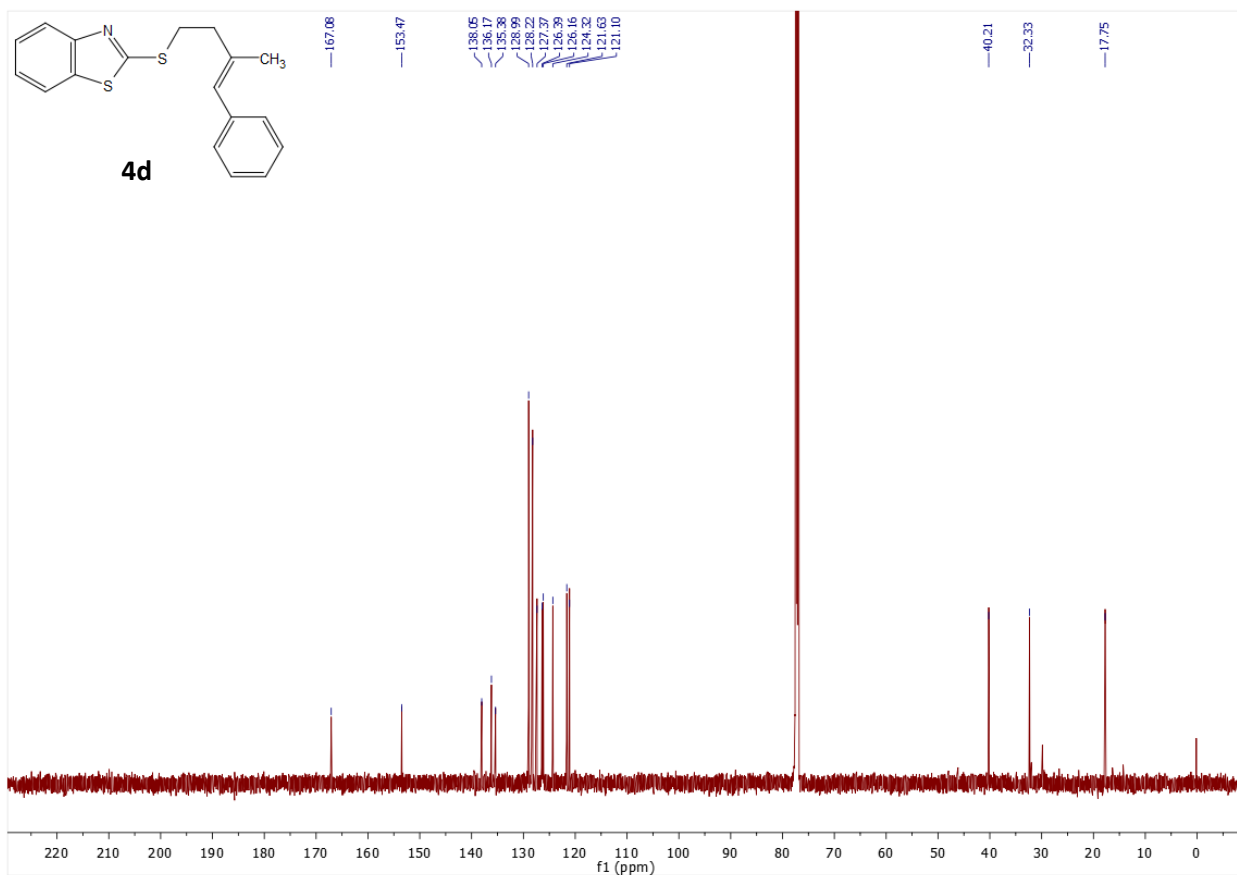

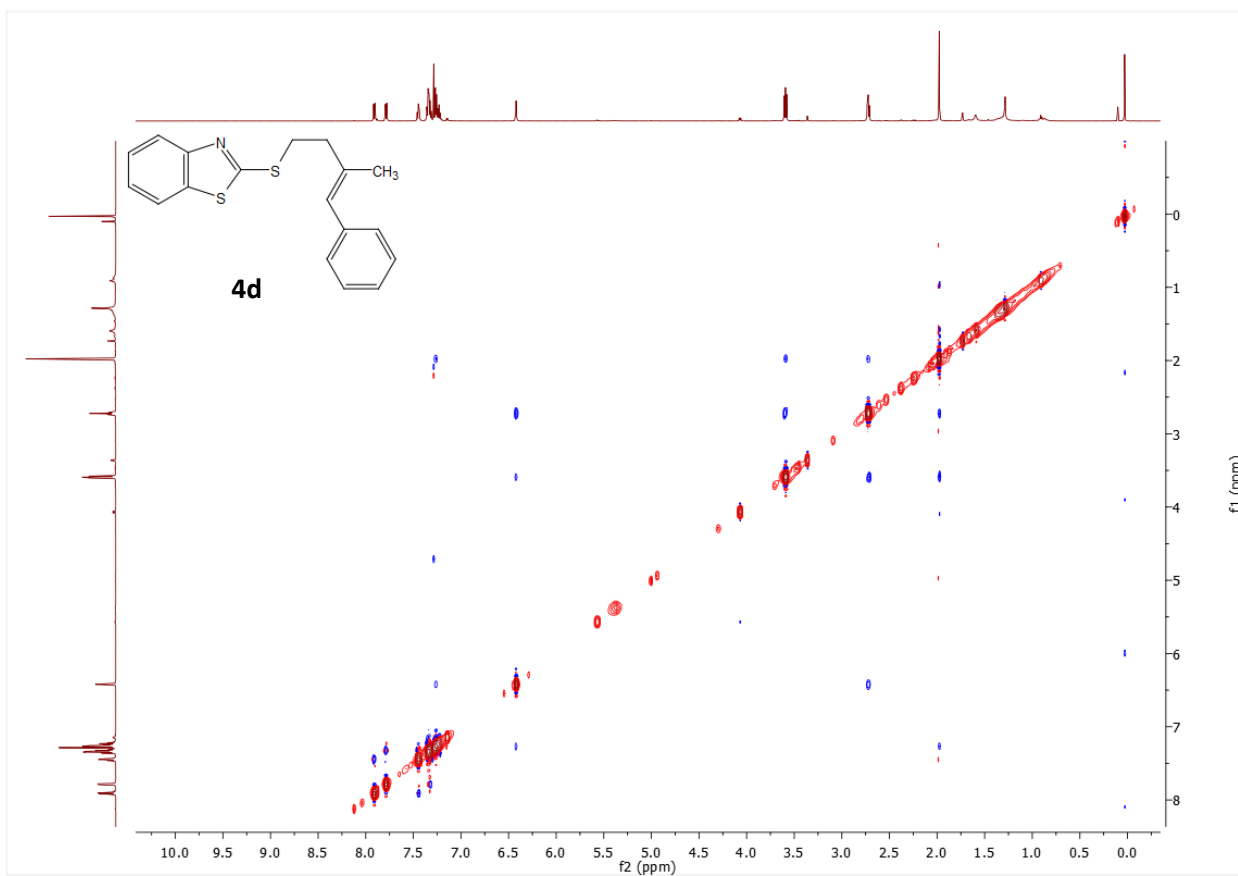

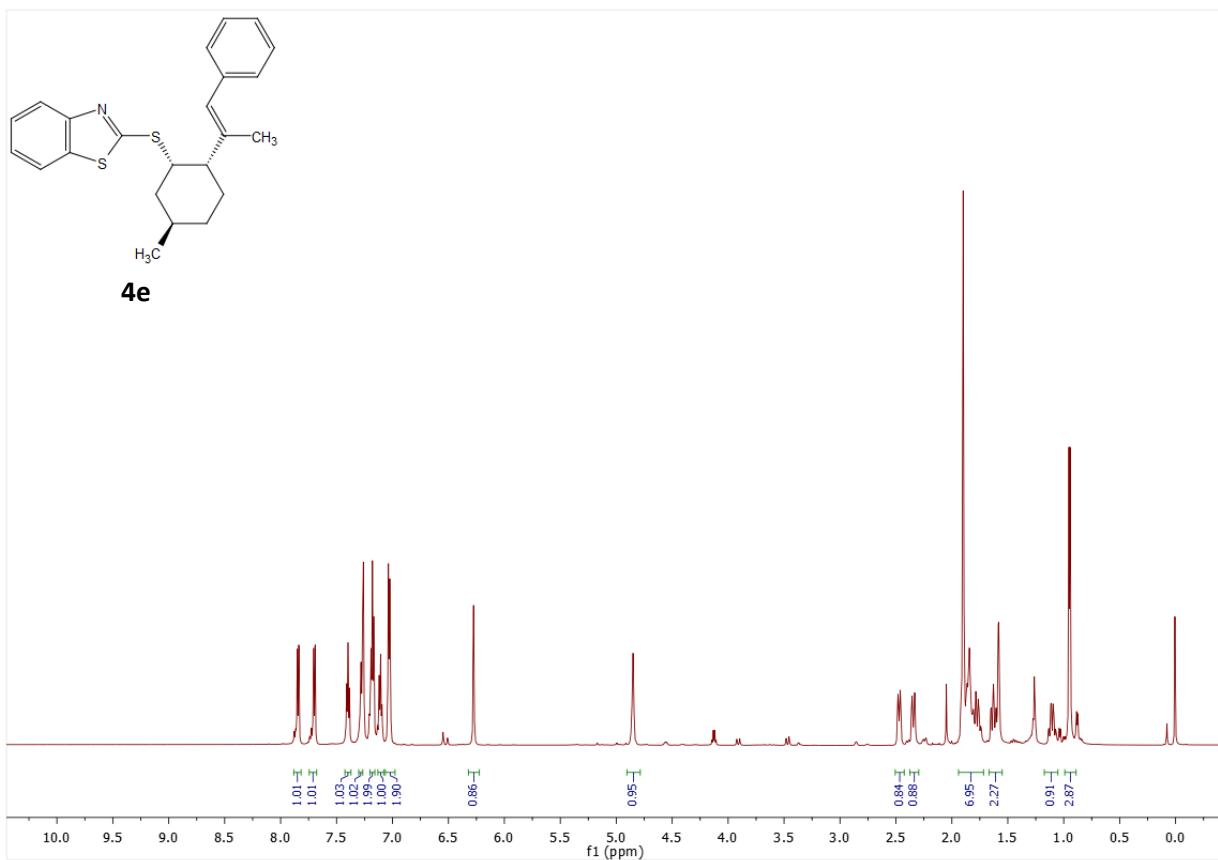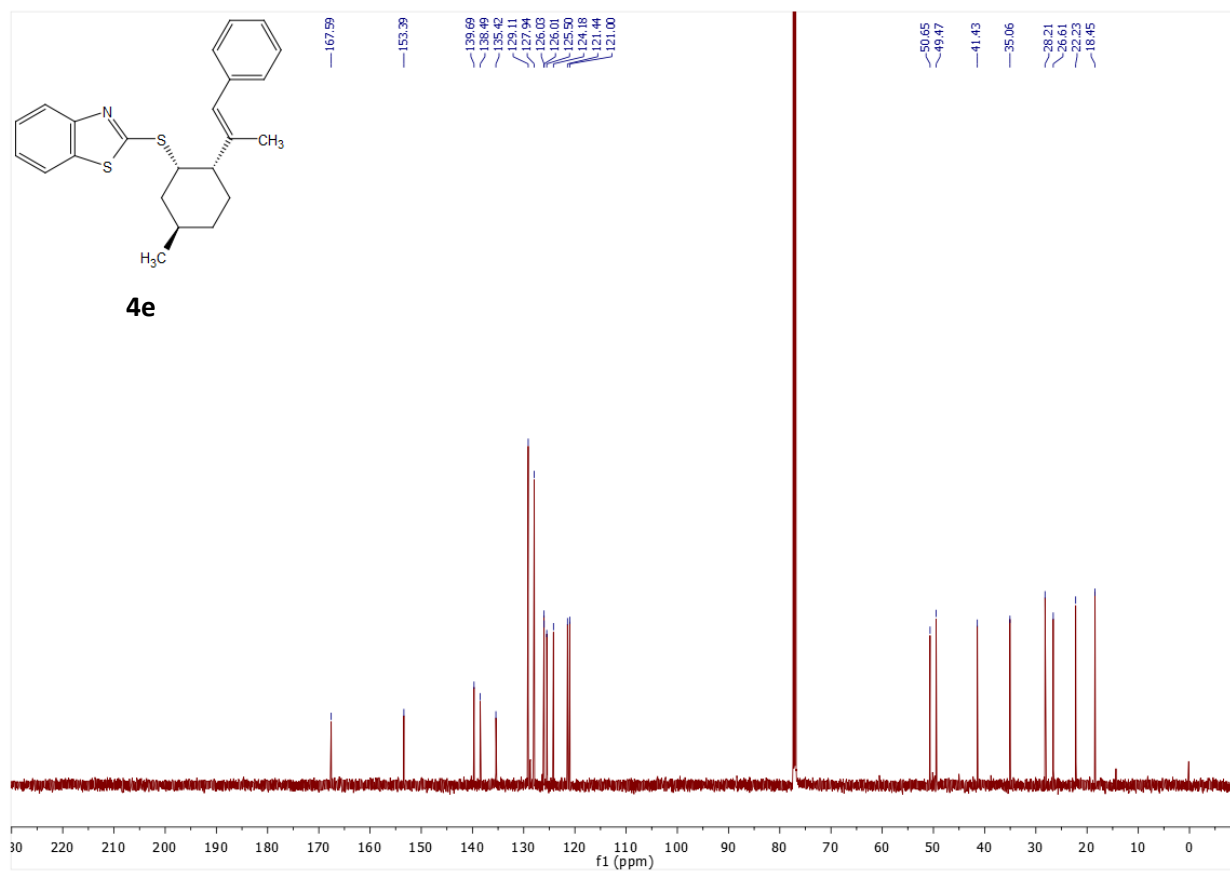

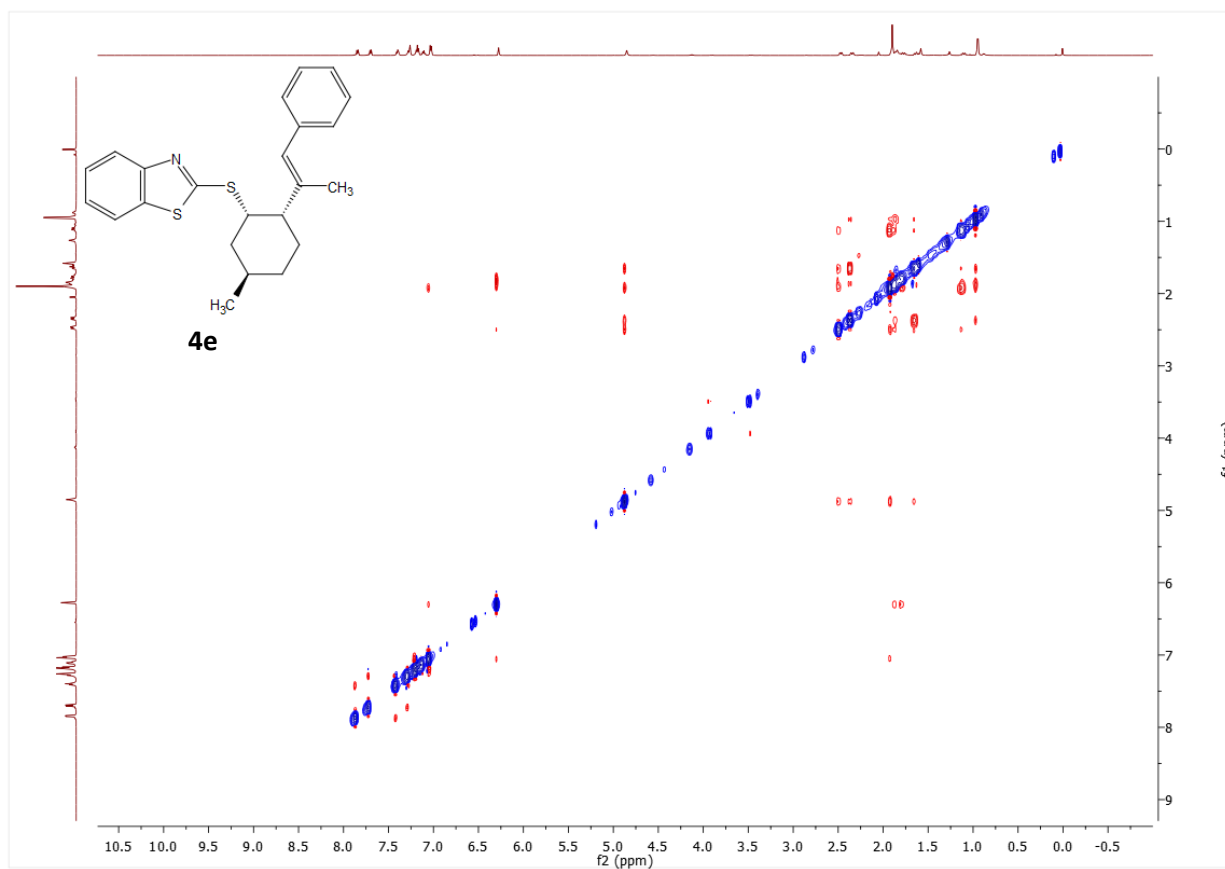

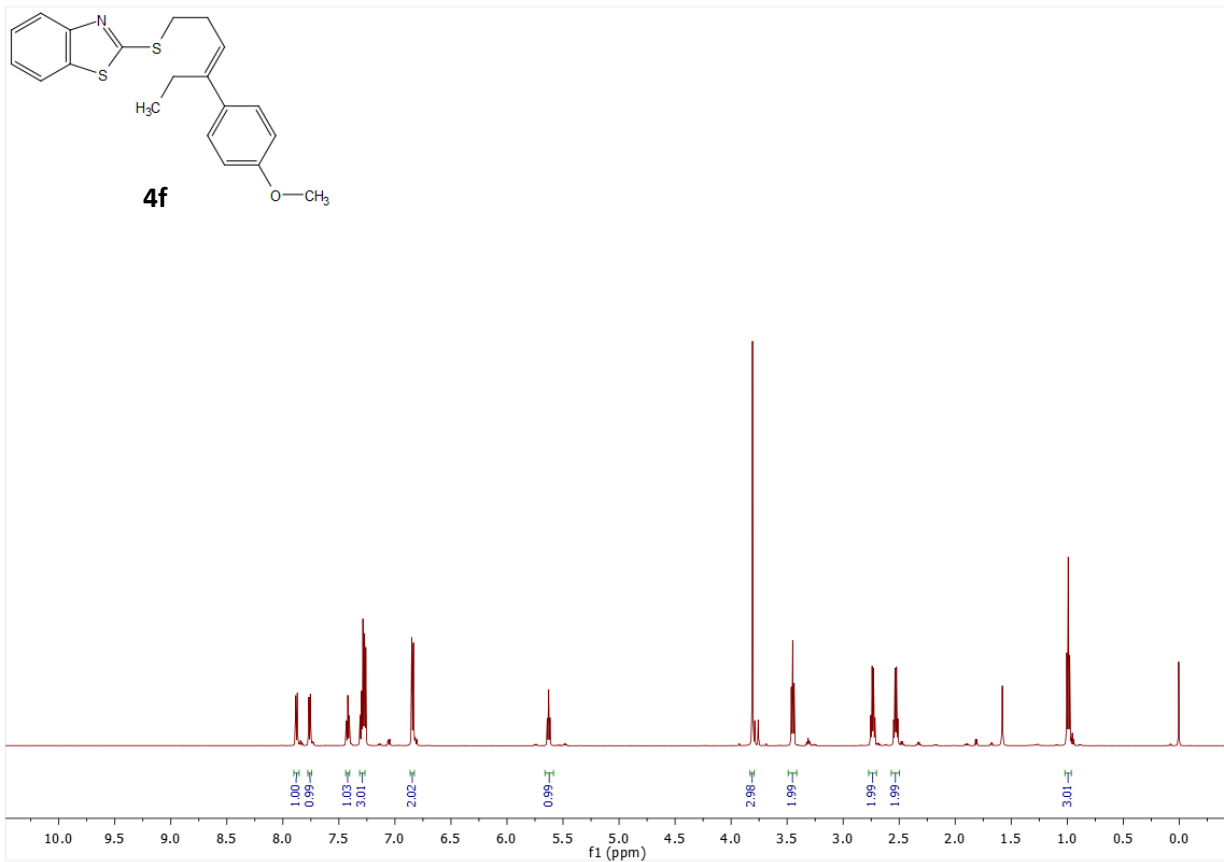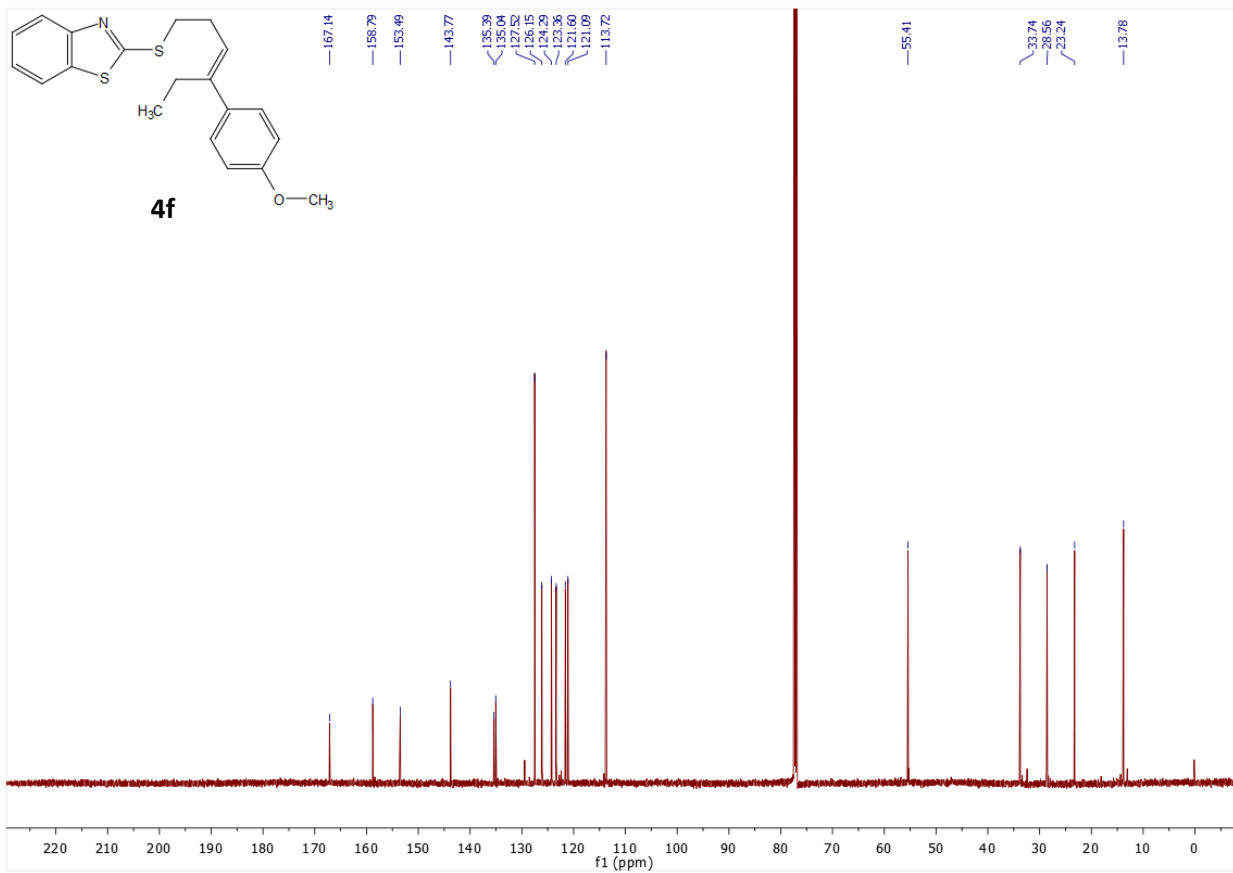



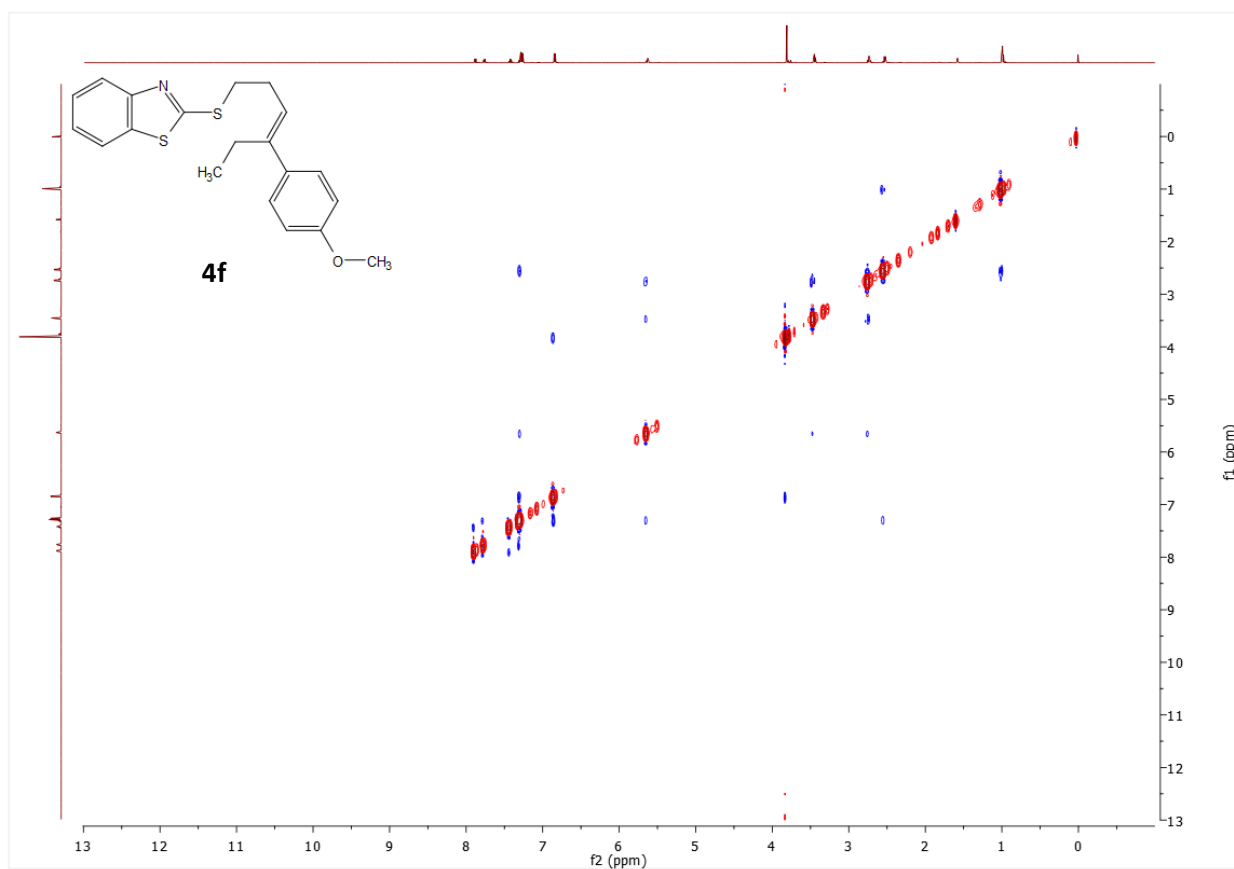

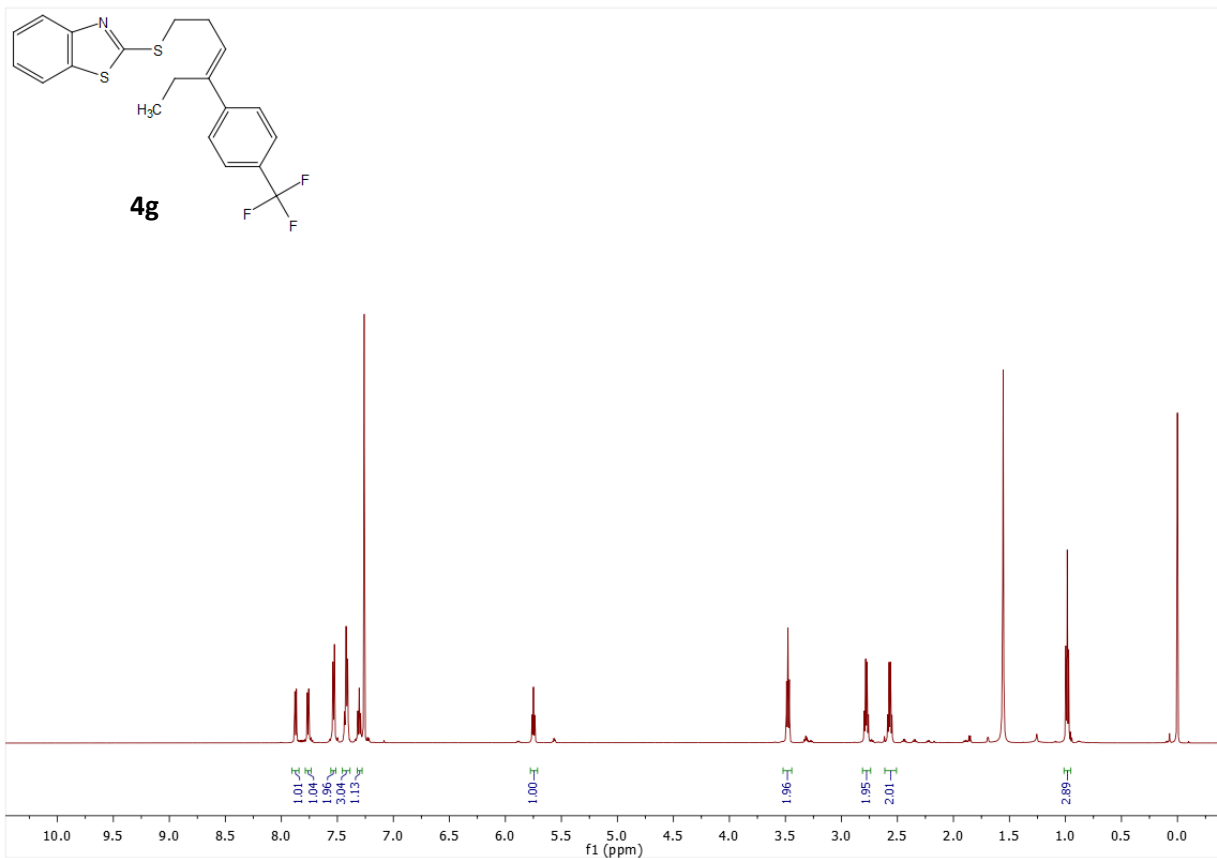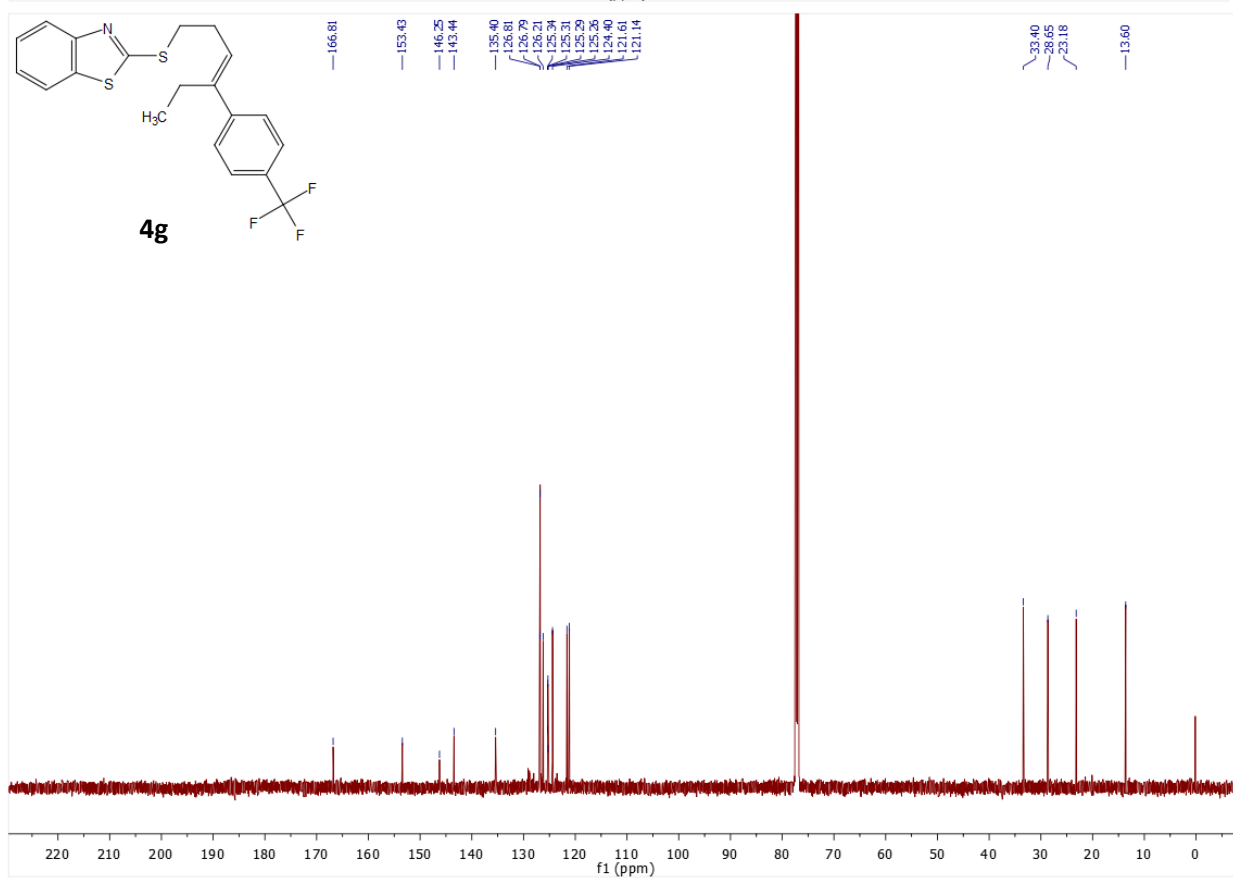

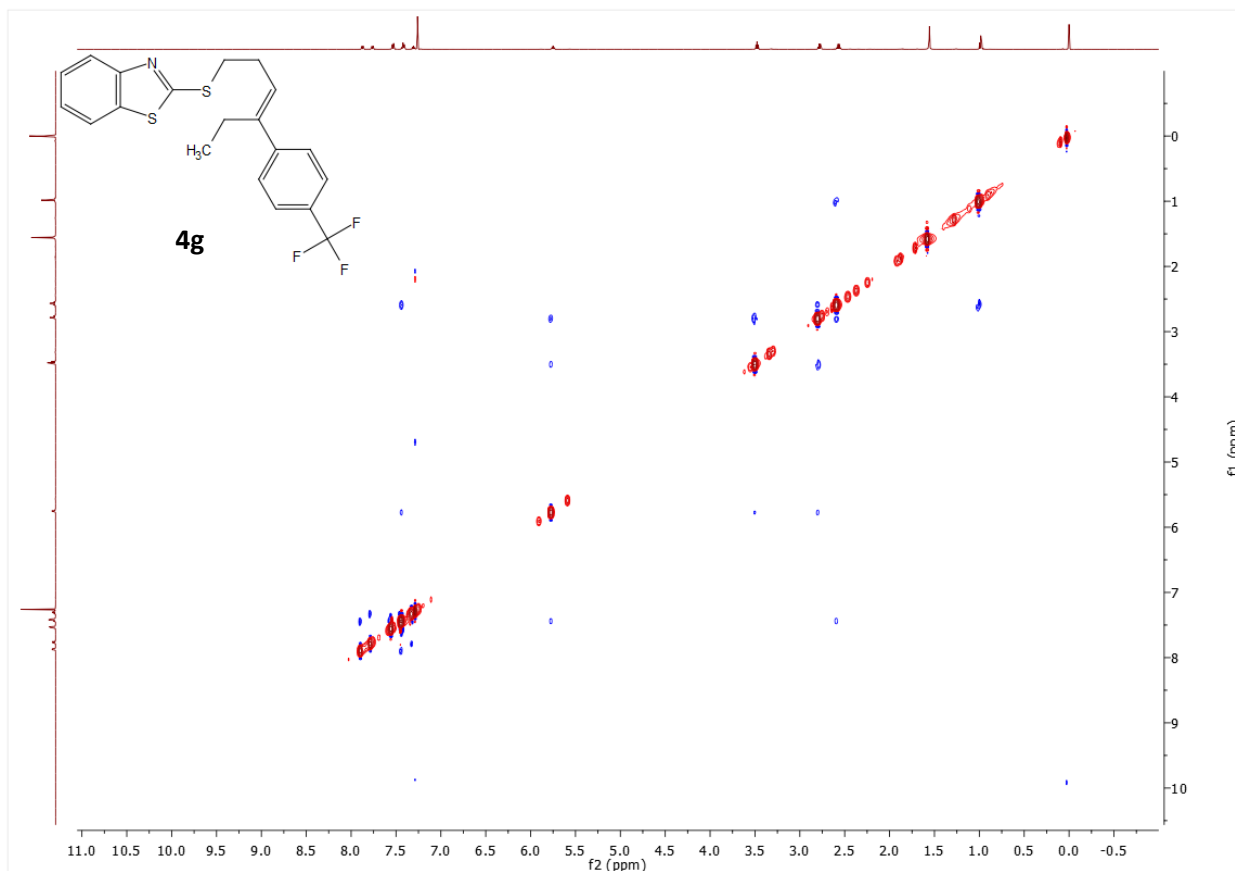

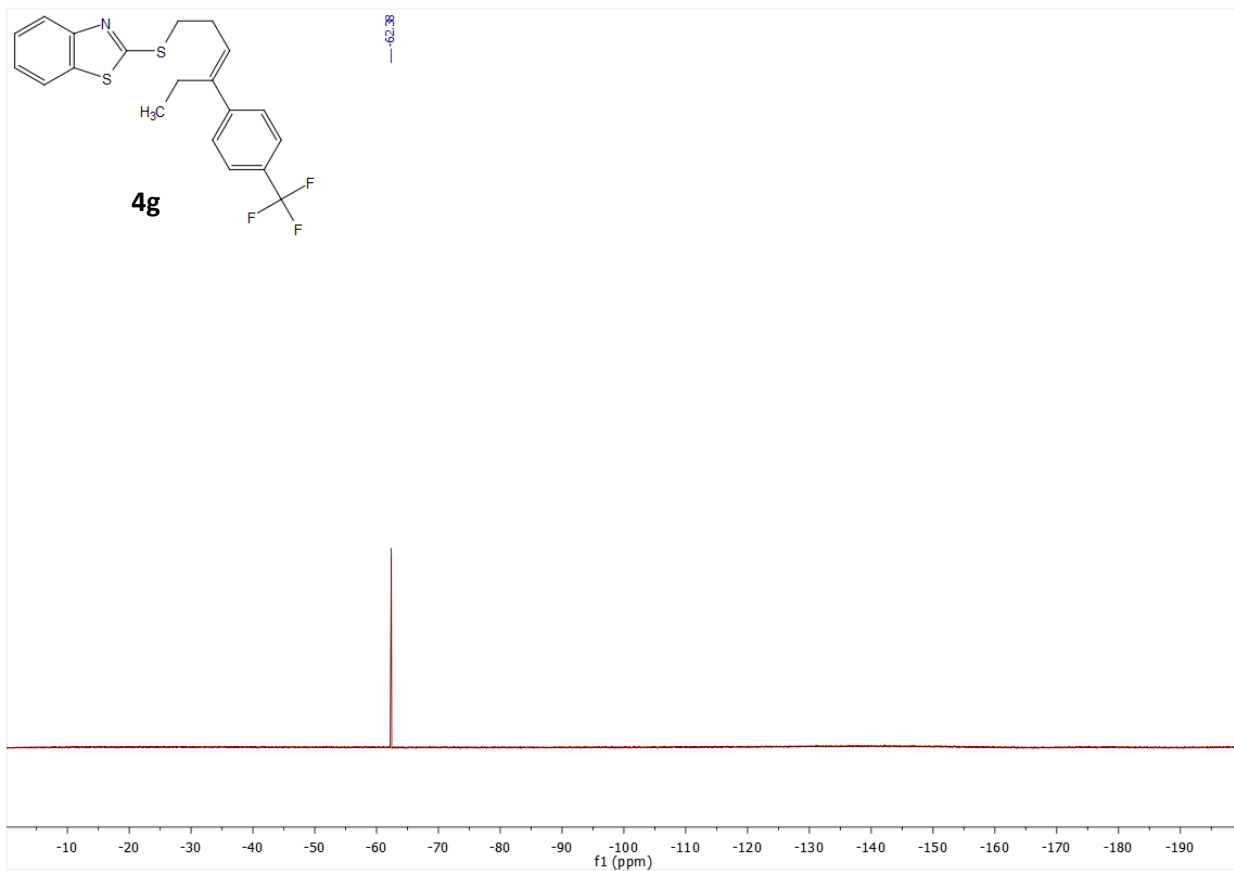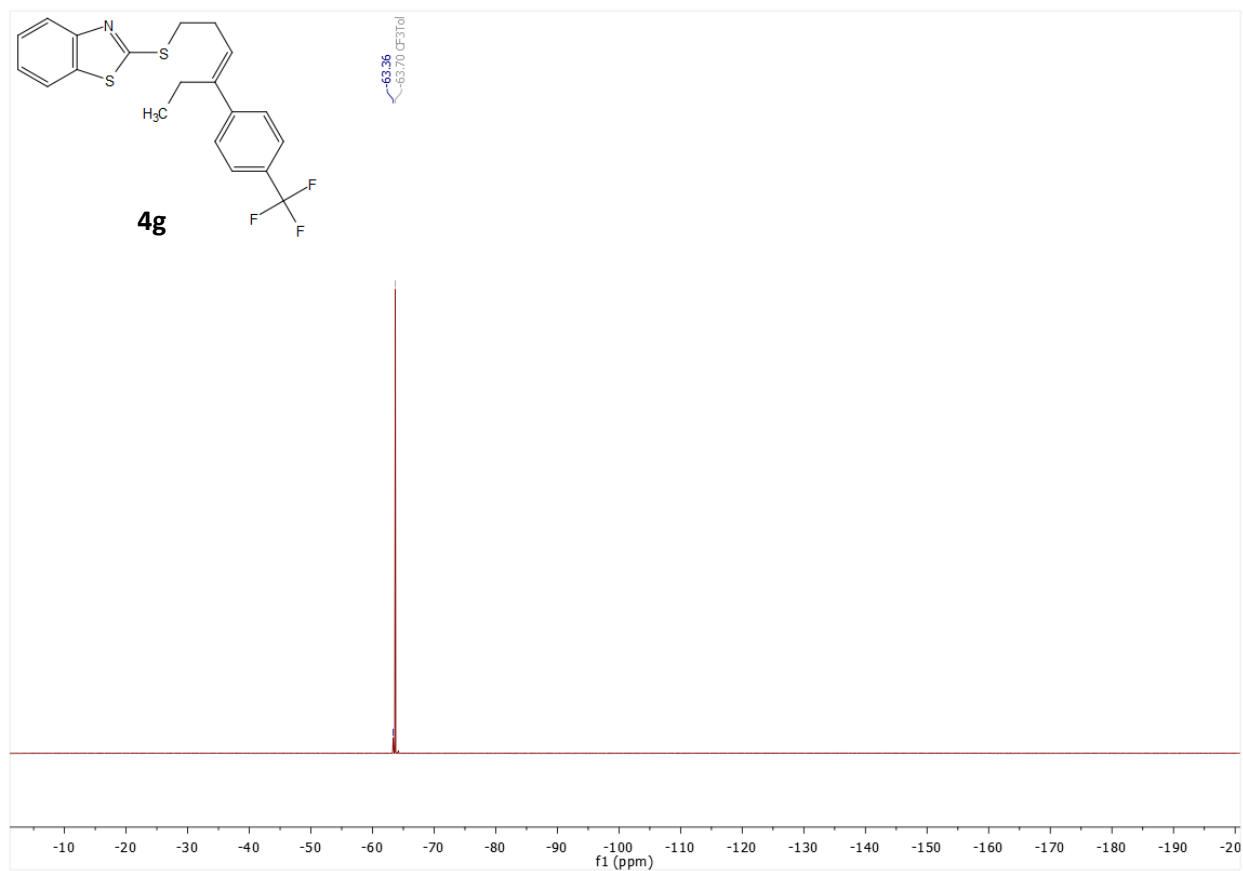

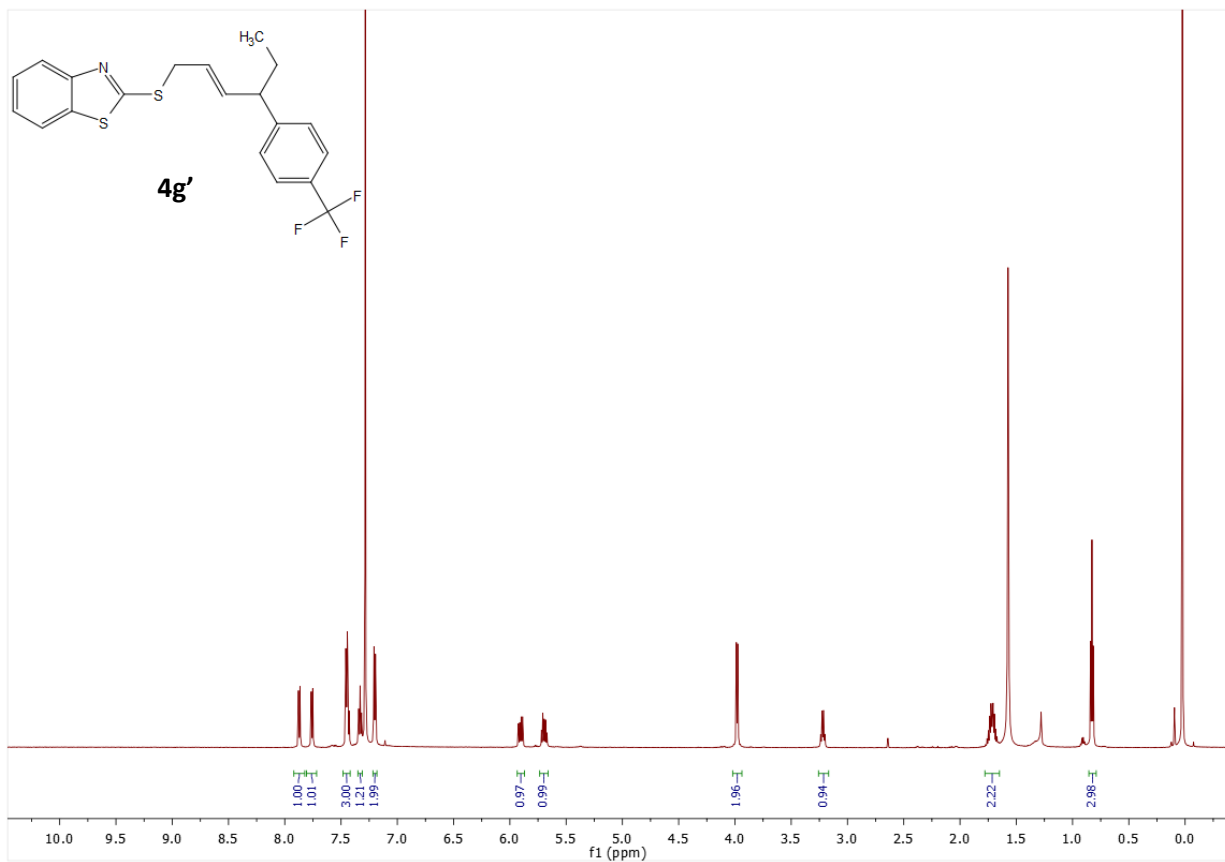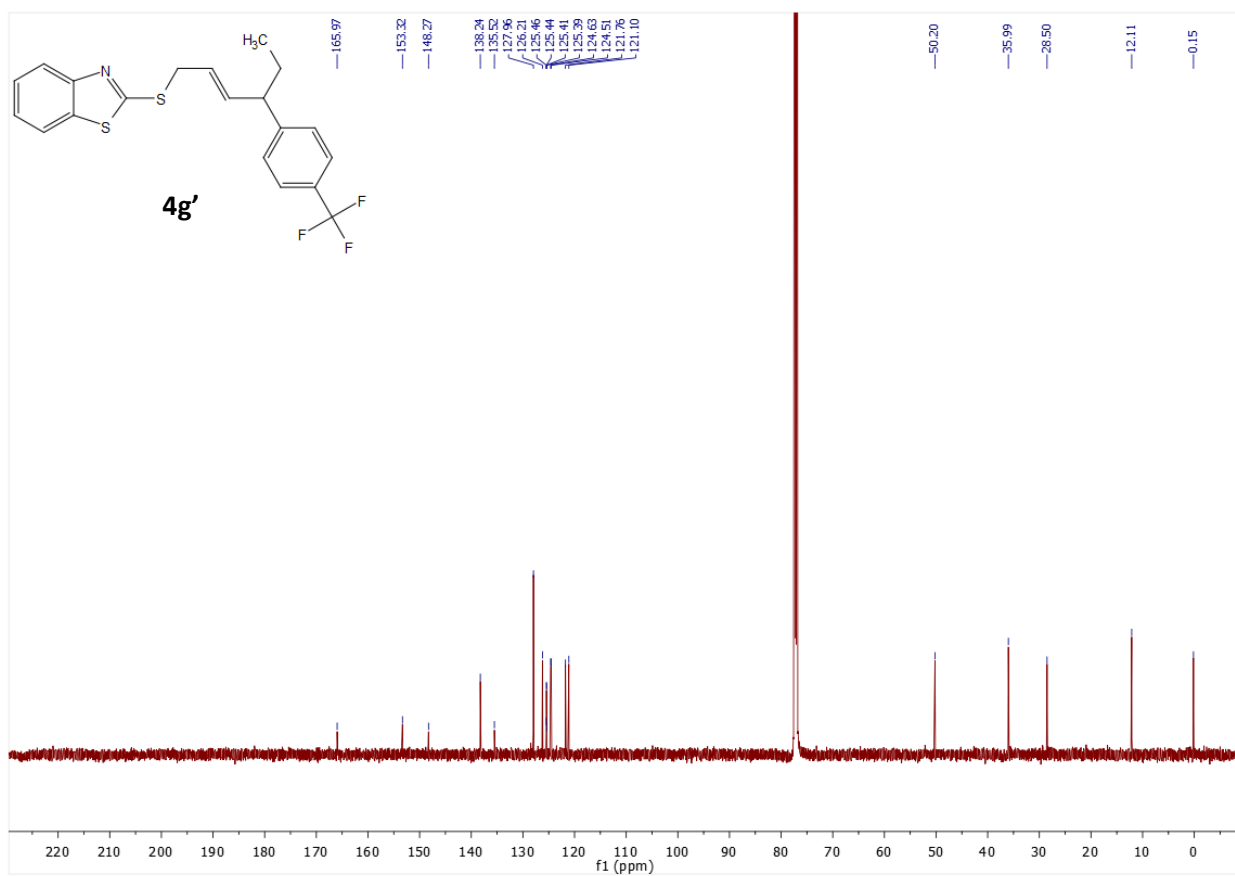

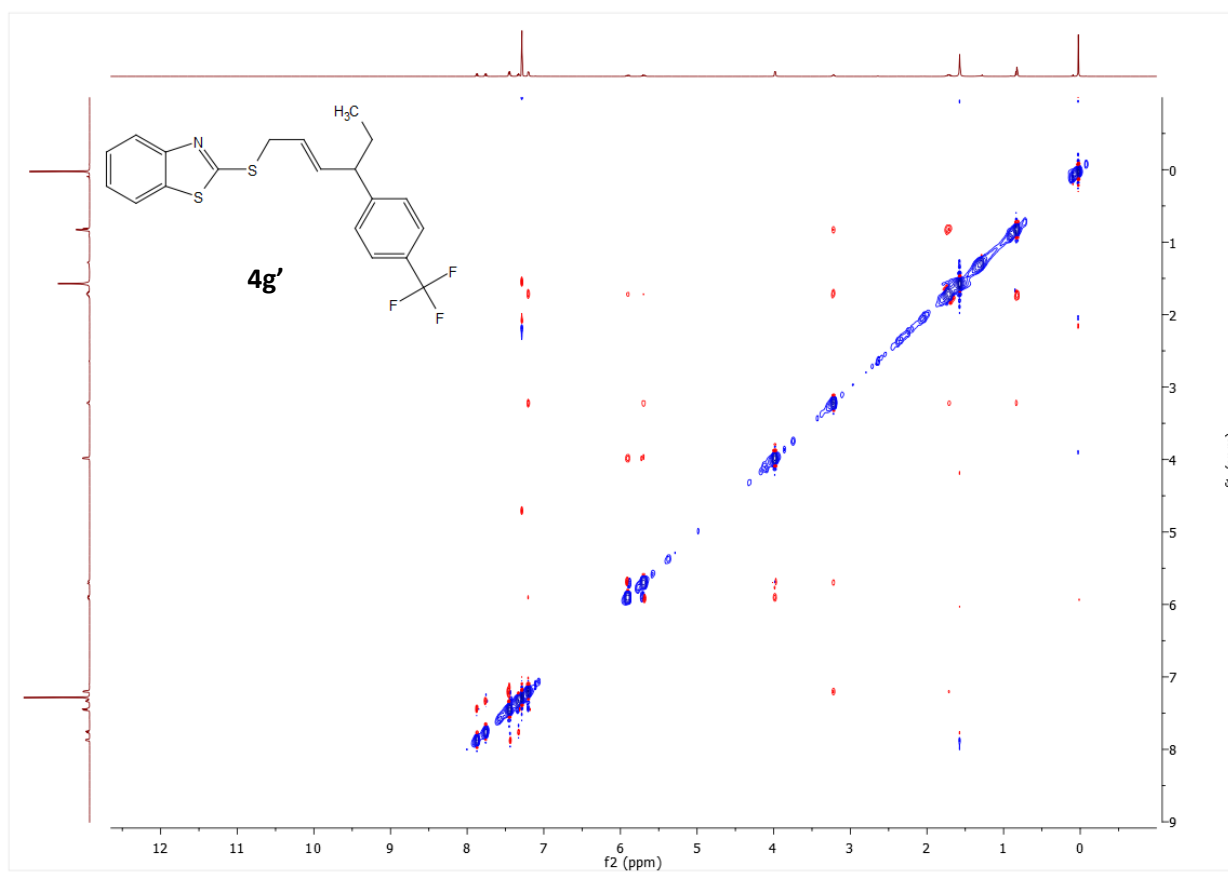

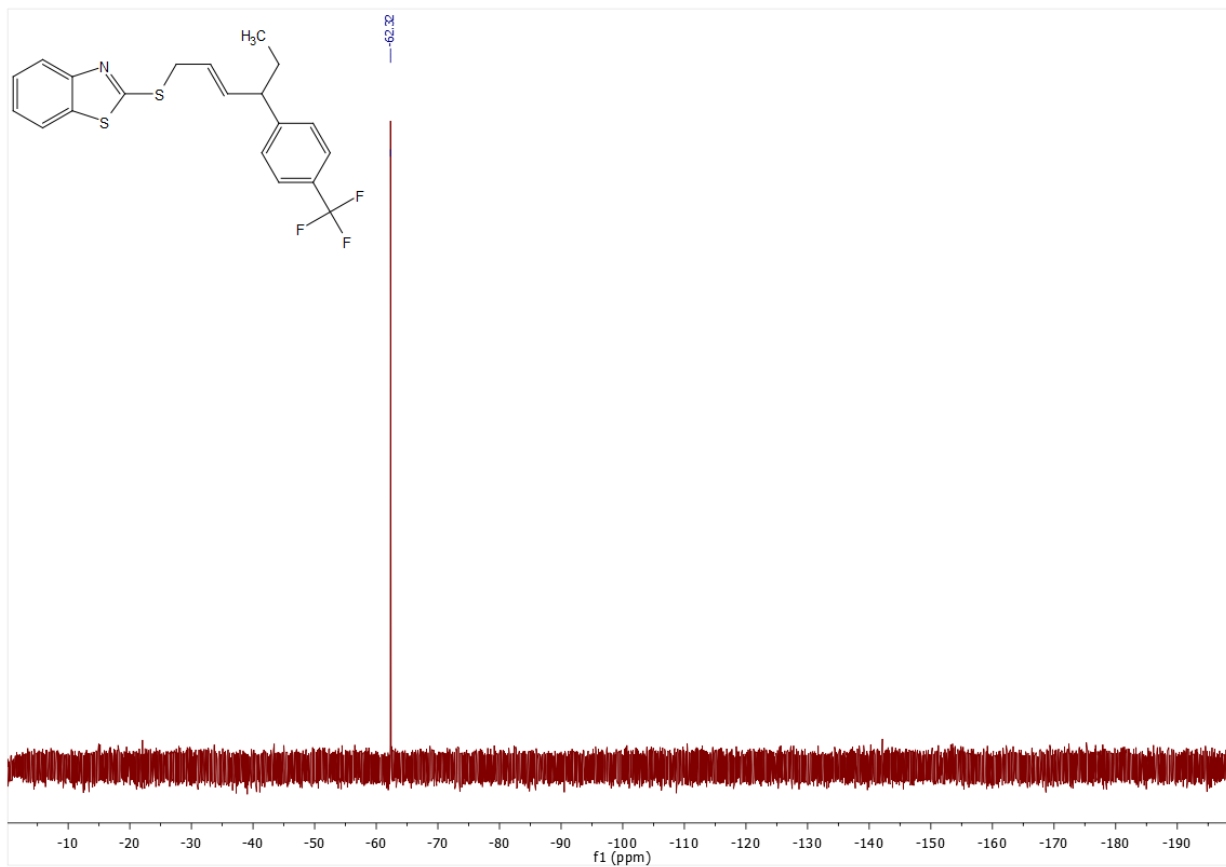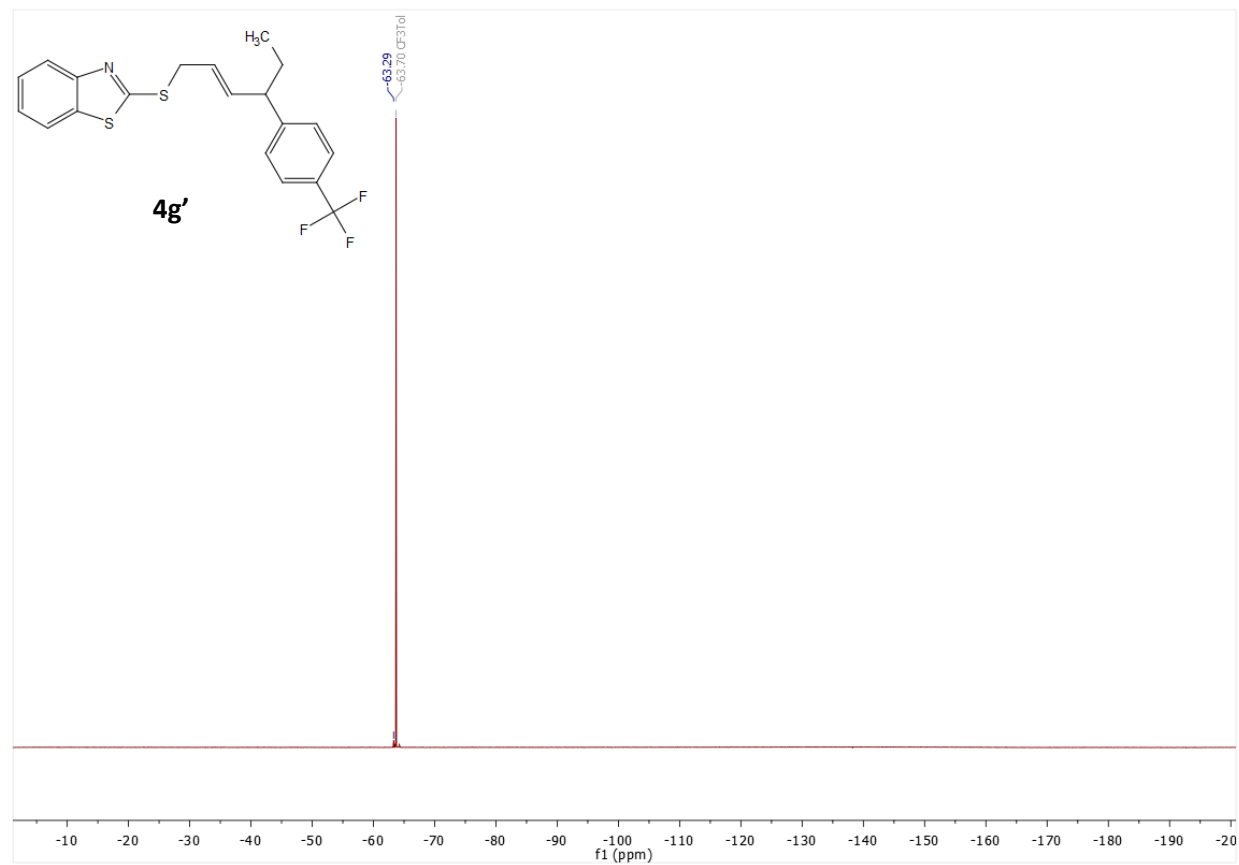

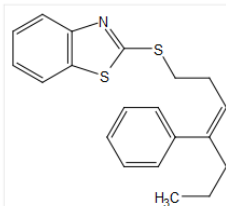

**4h**

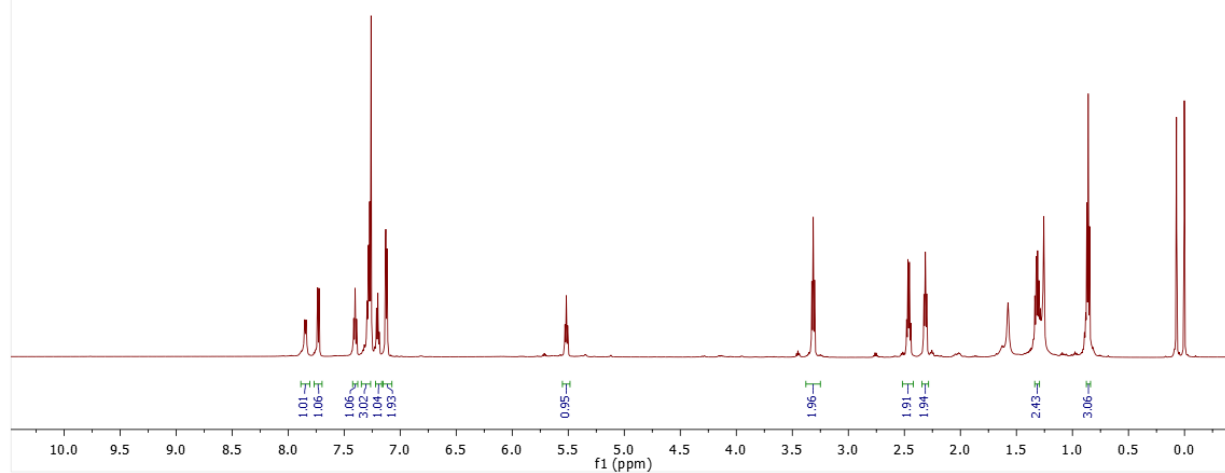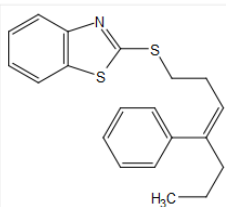

**4h**

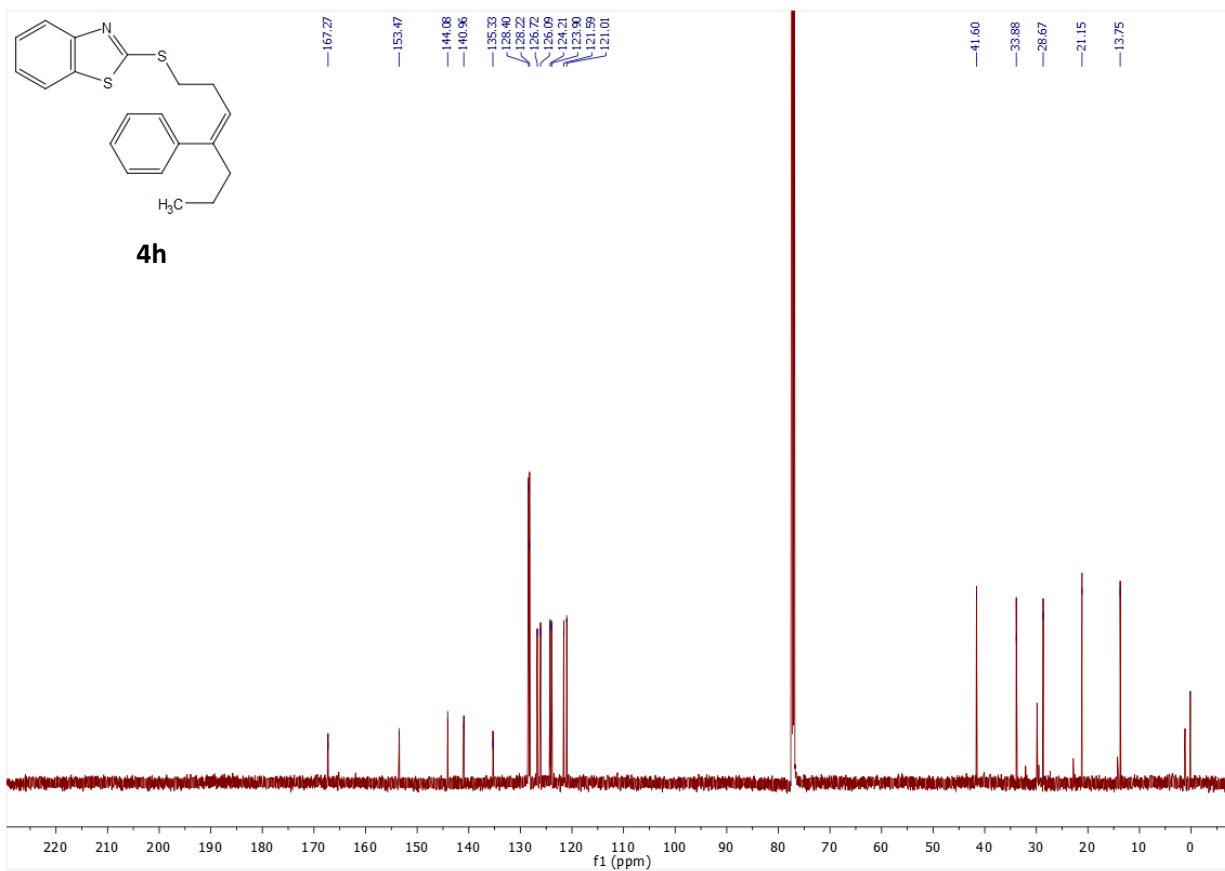



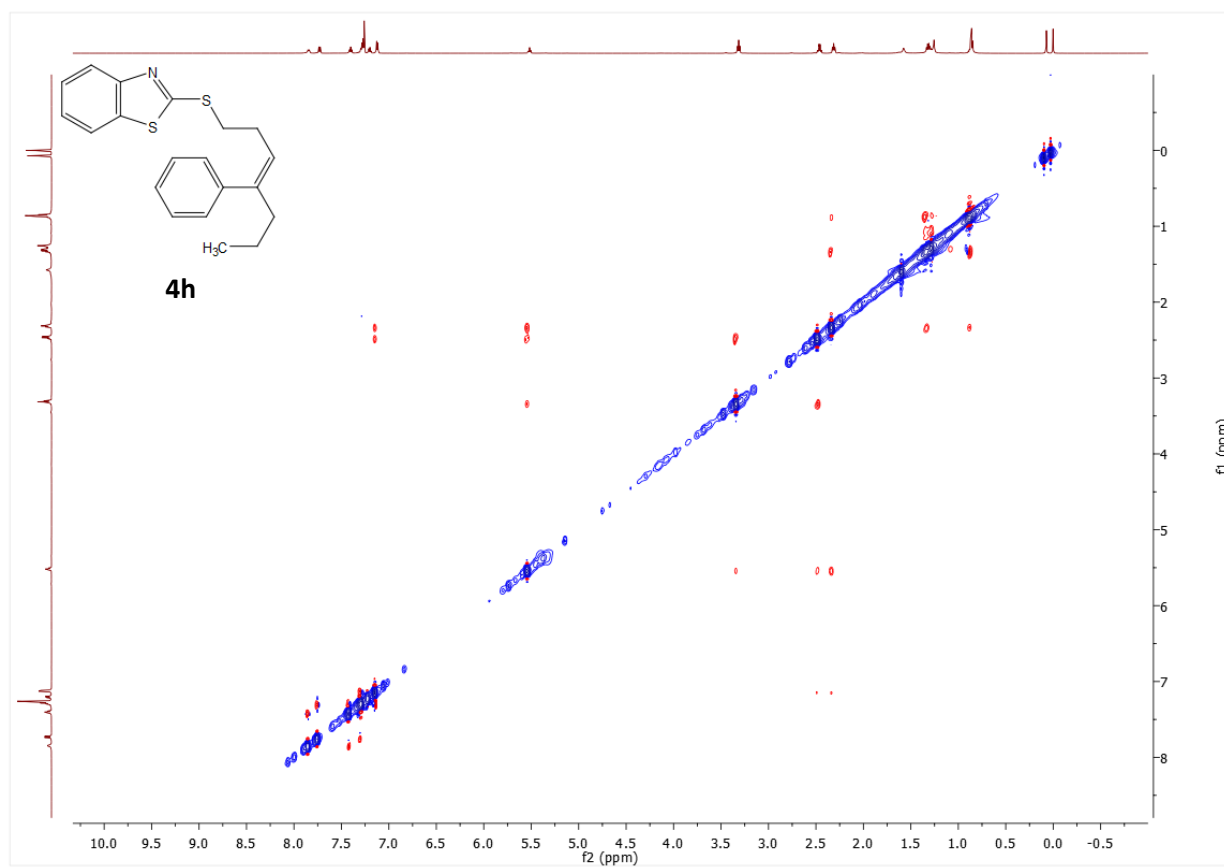

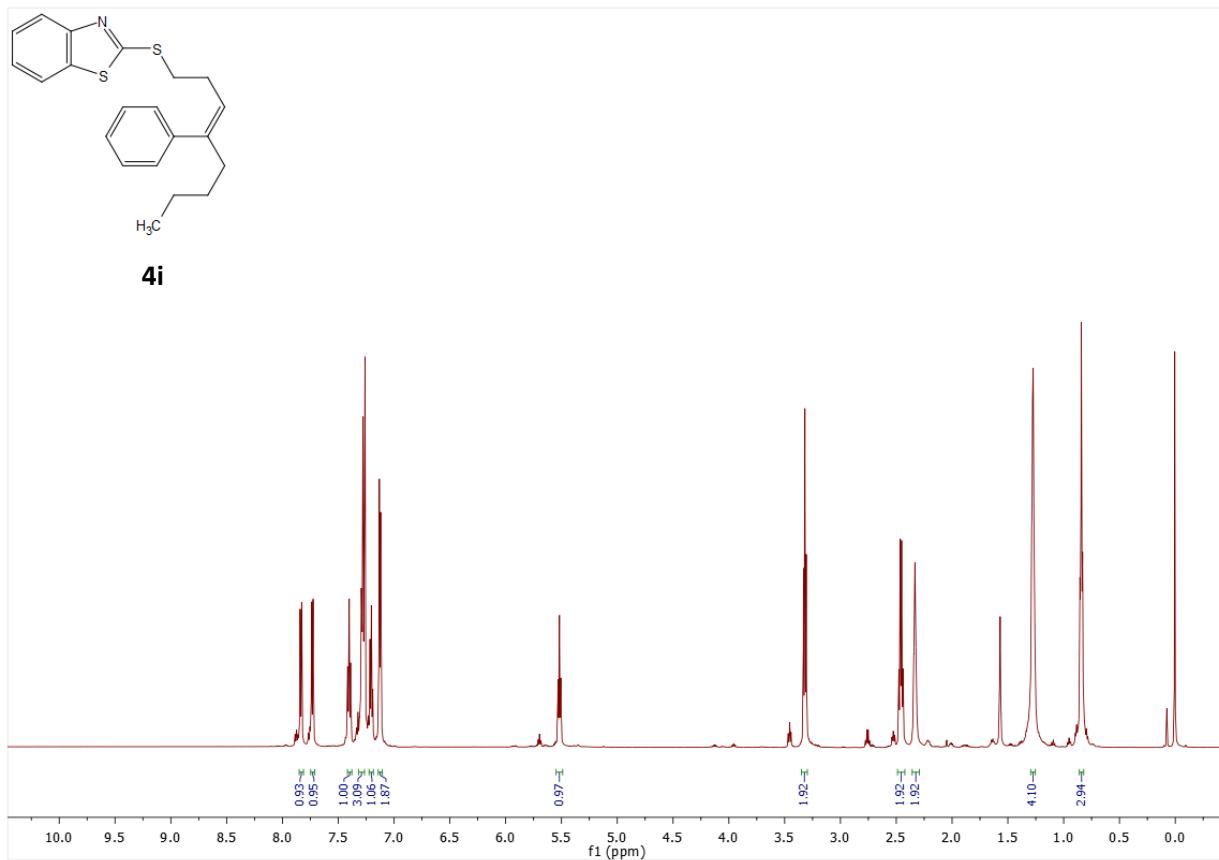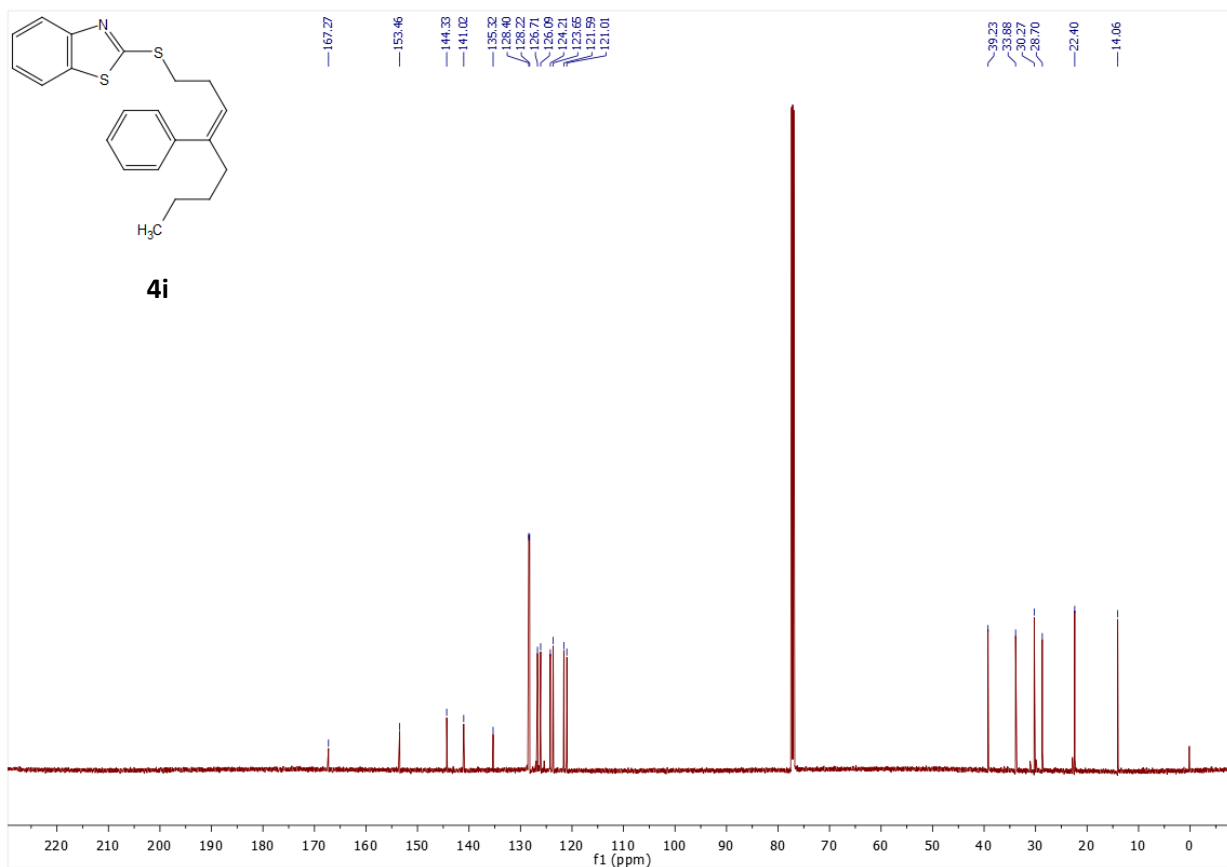

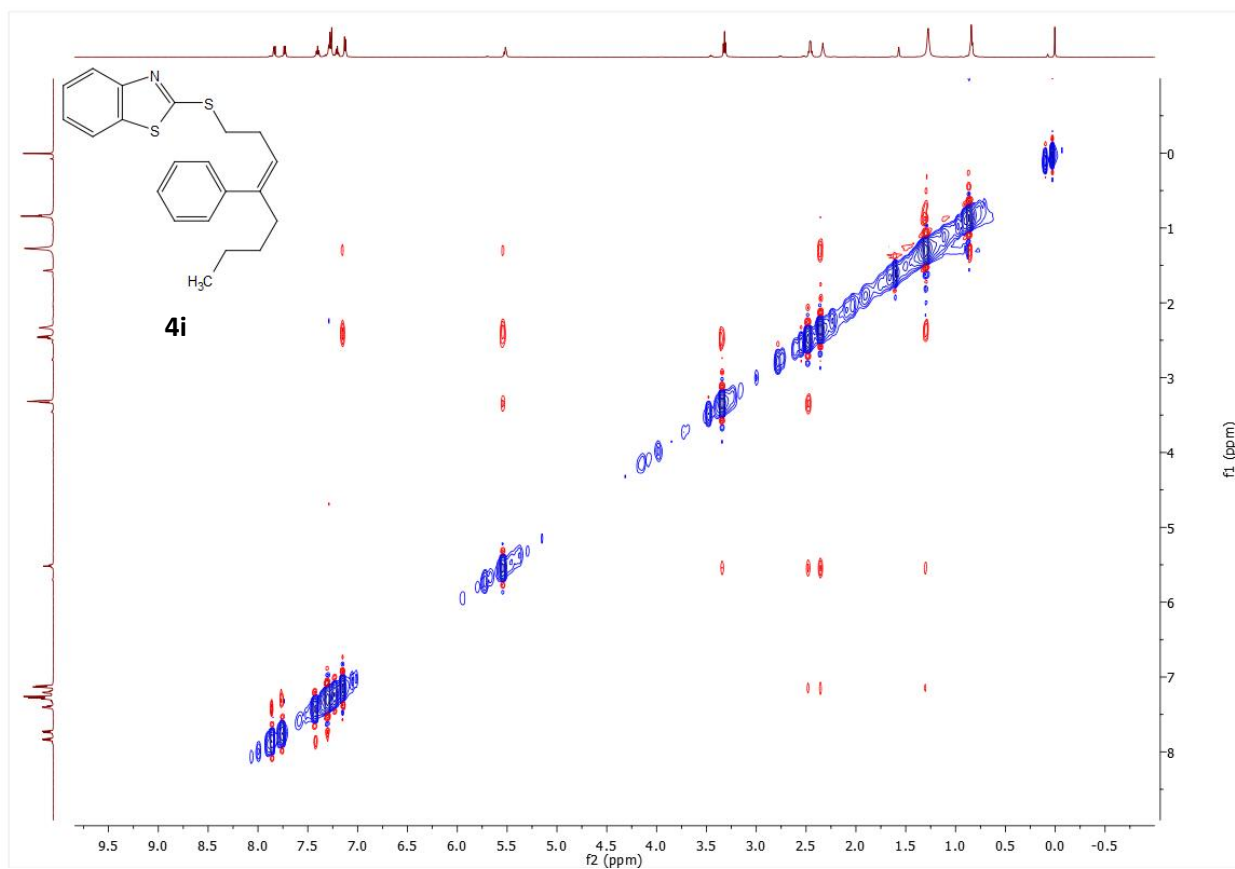

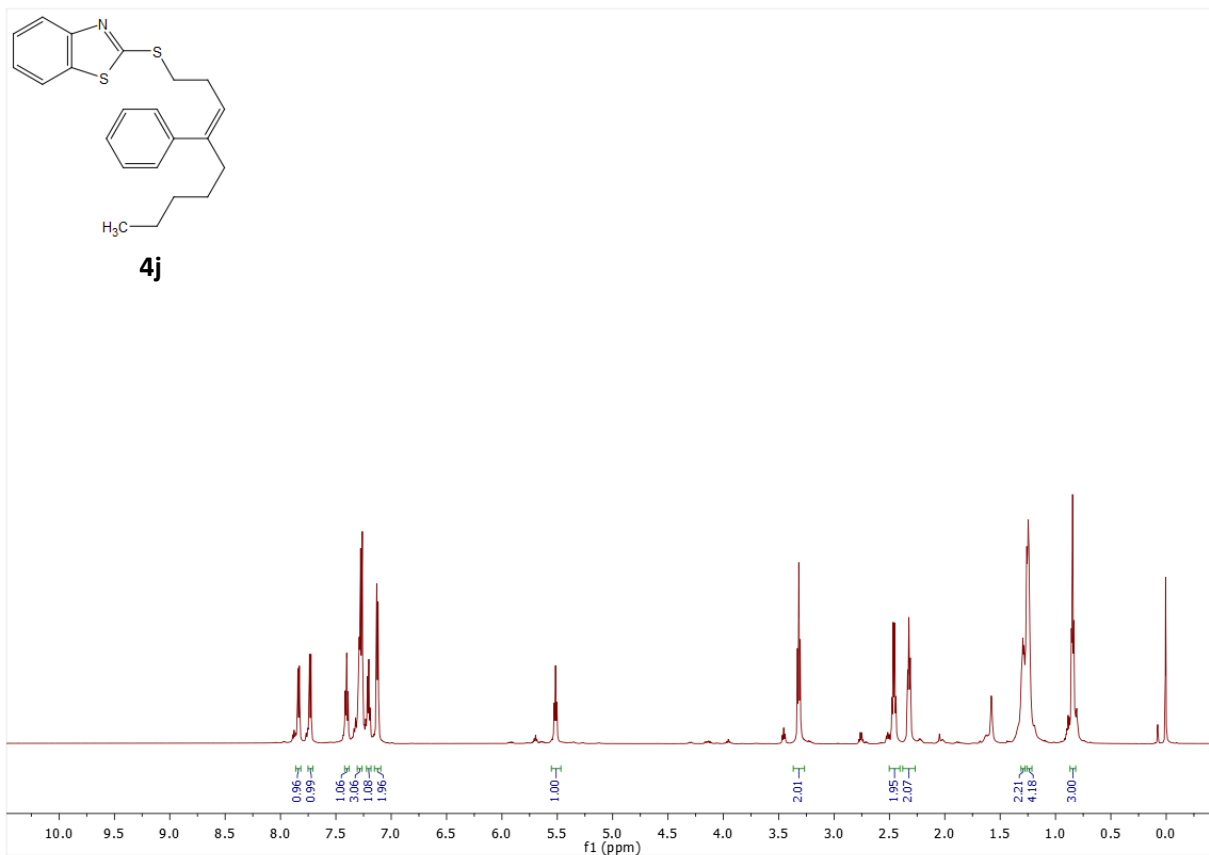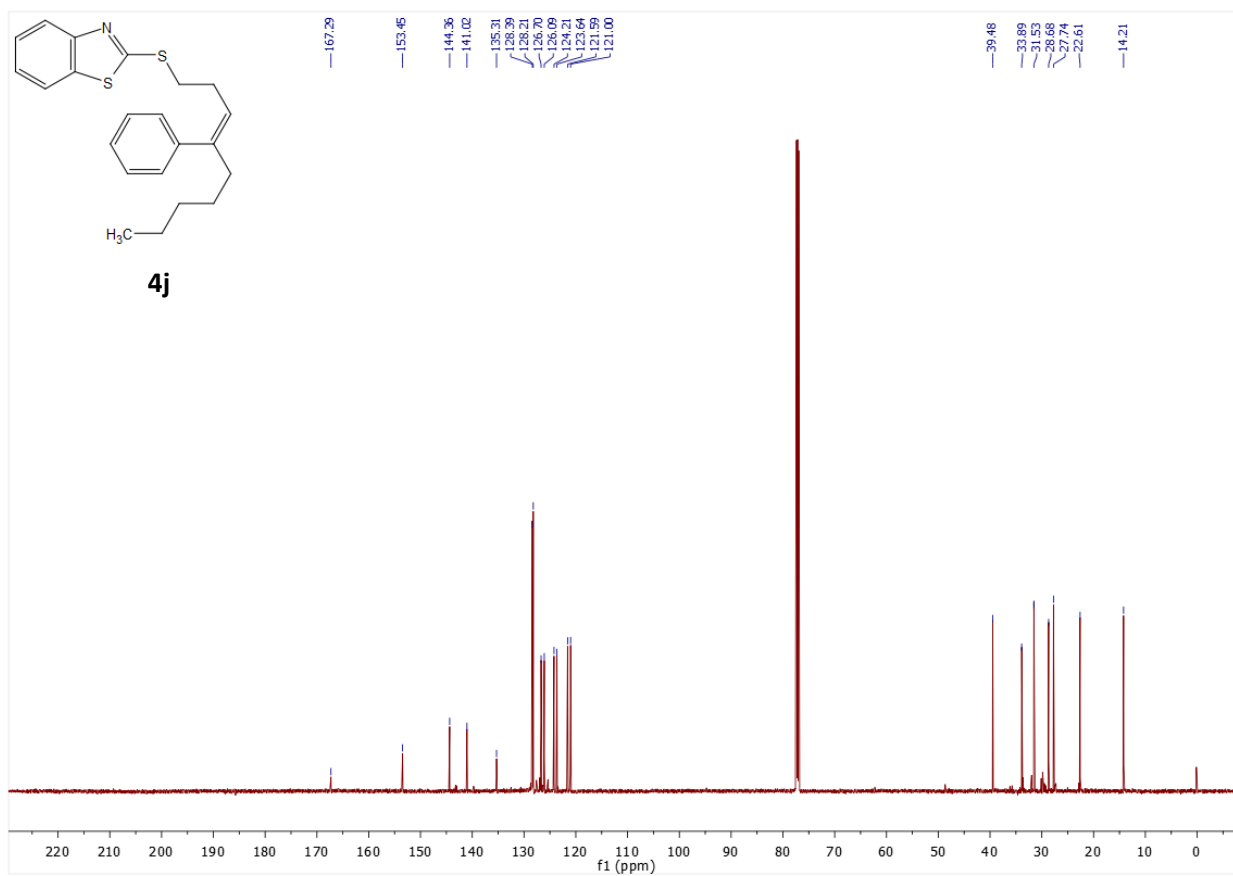

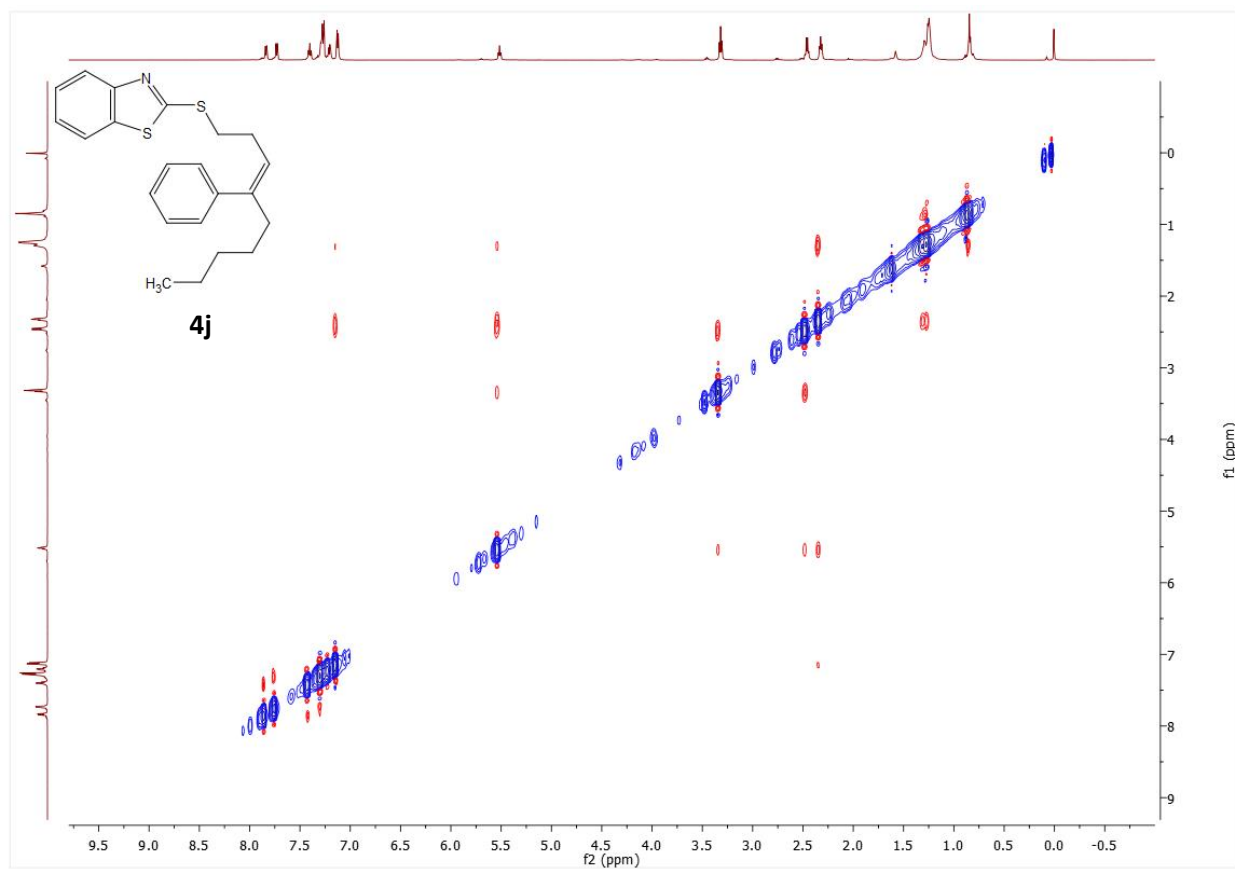

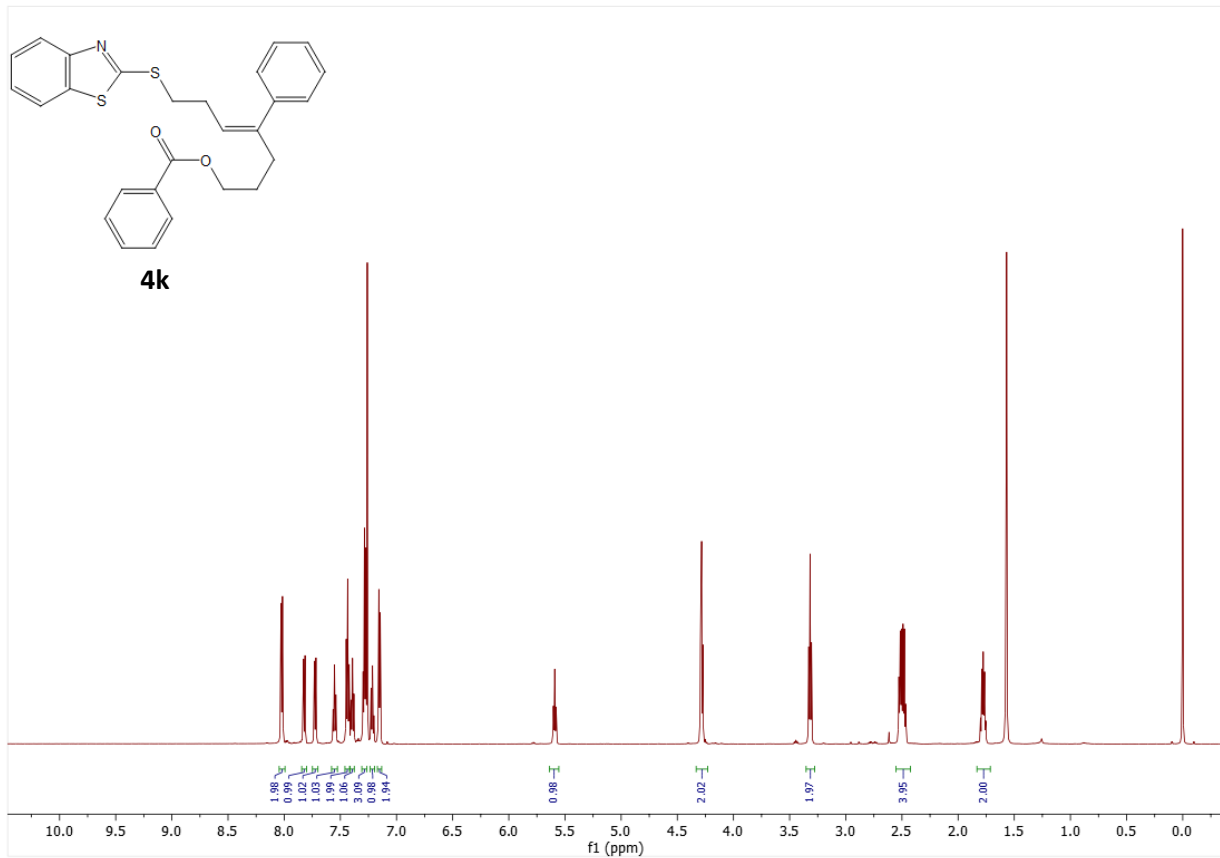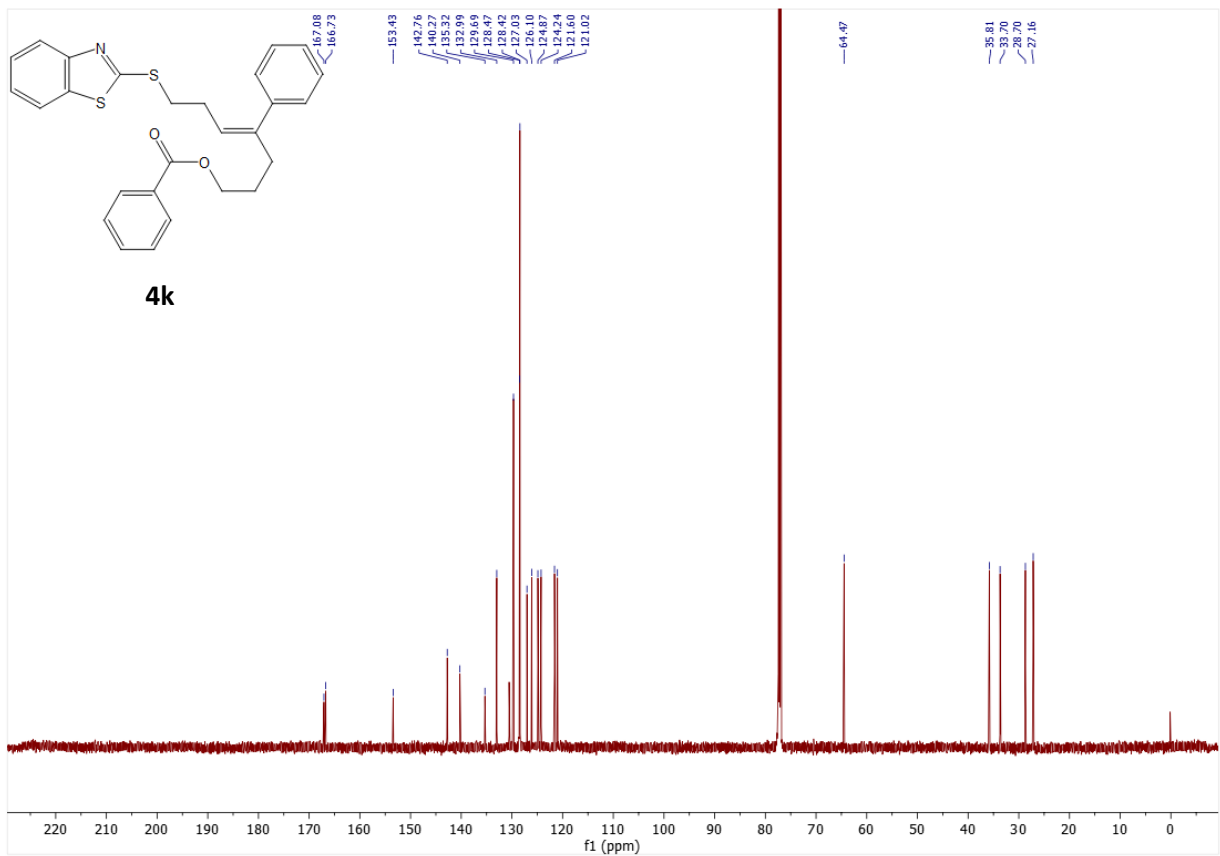

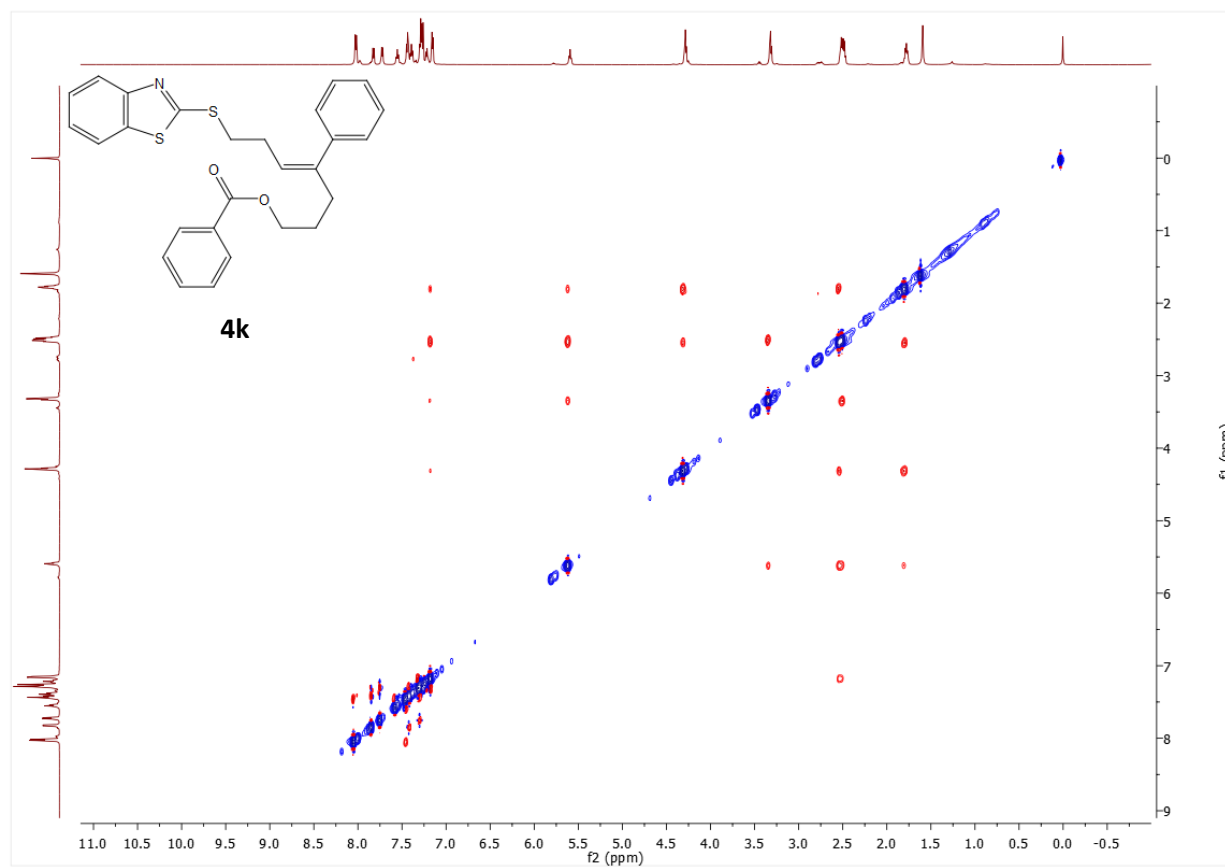

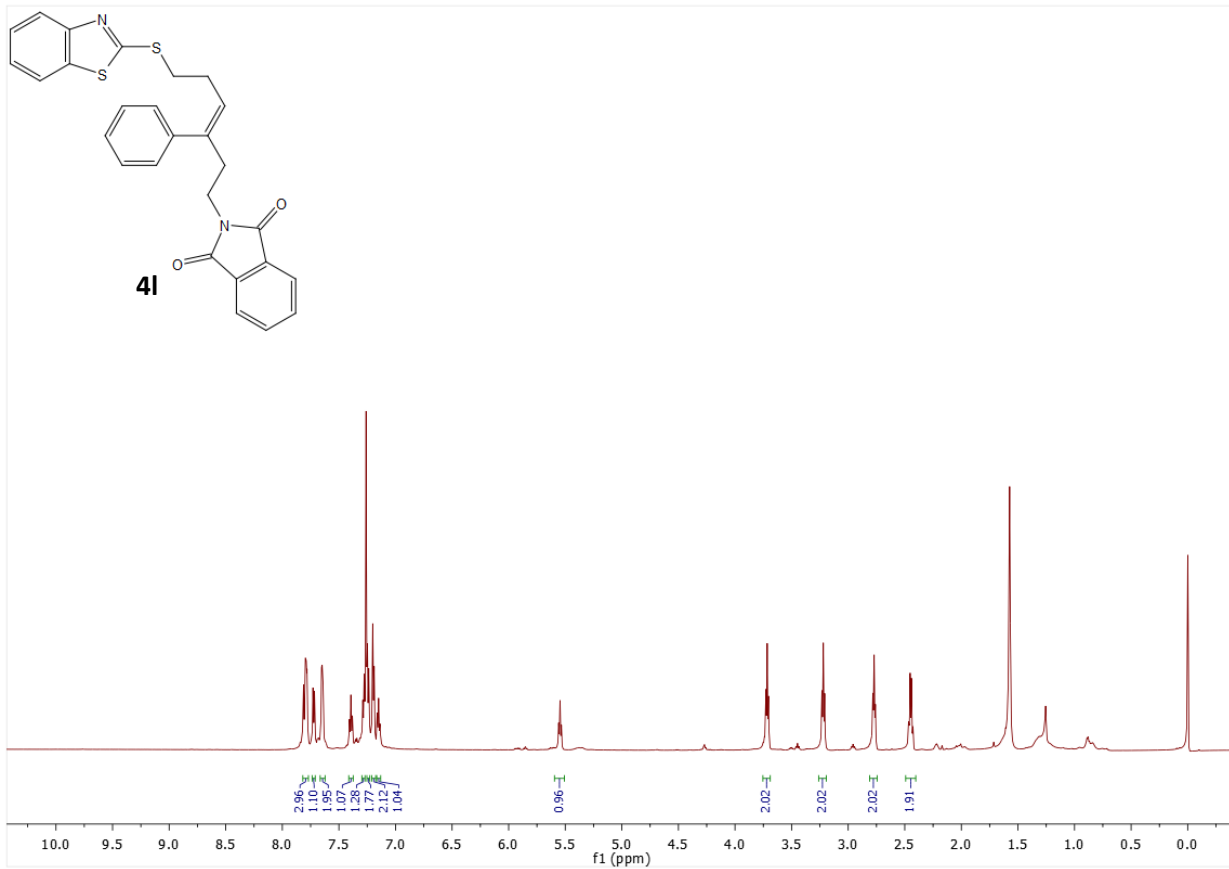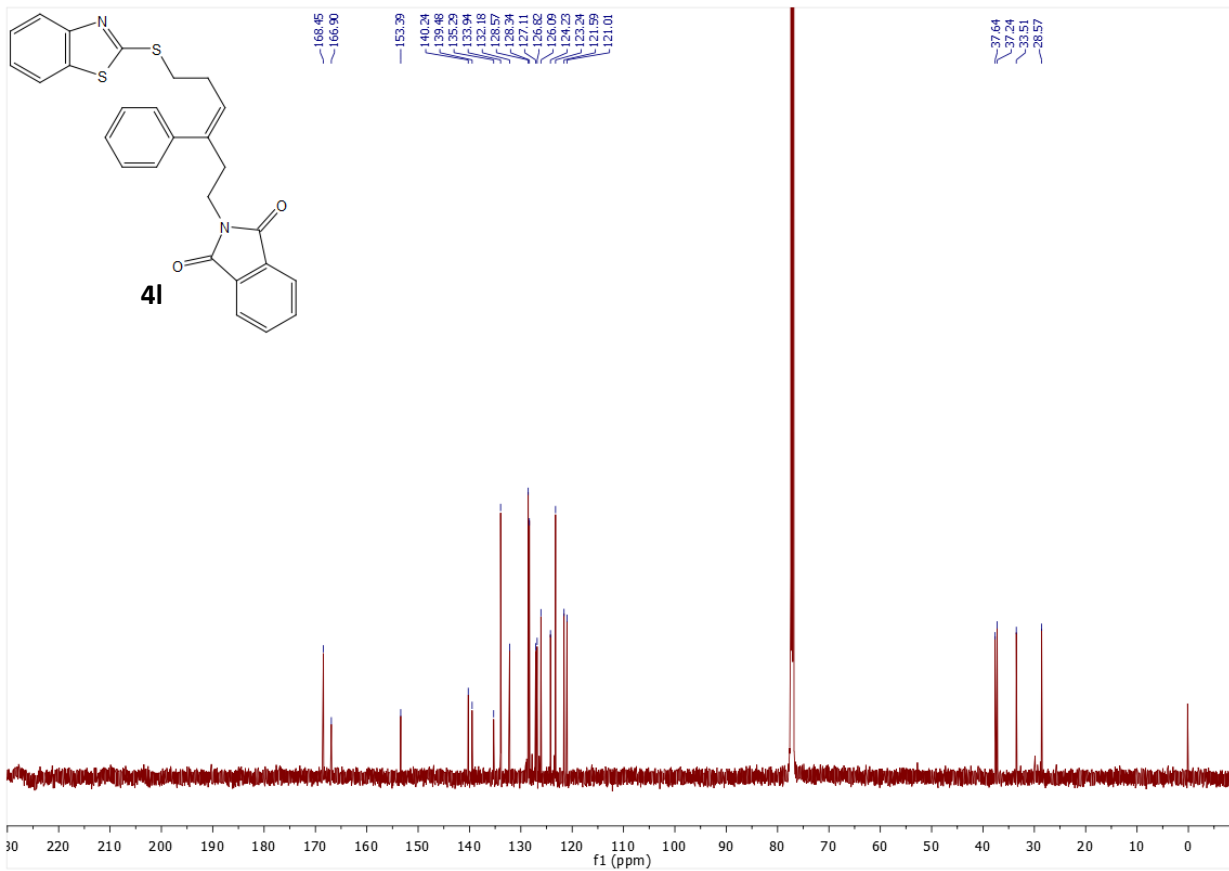



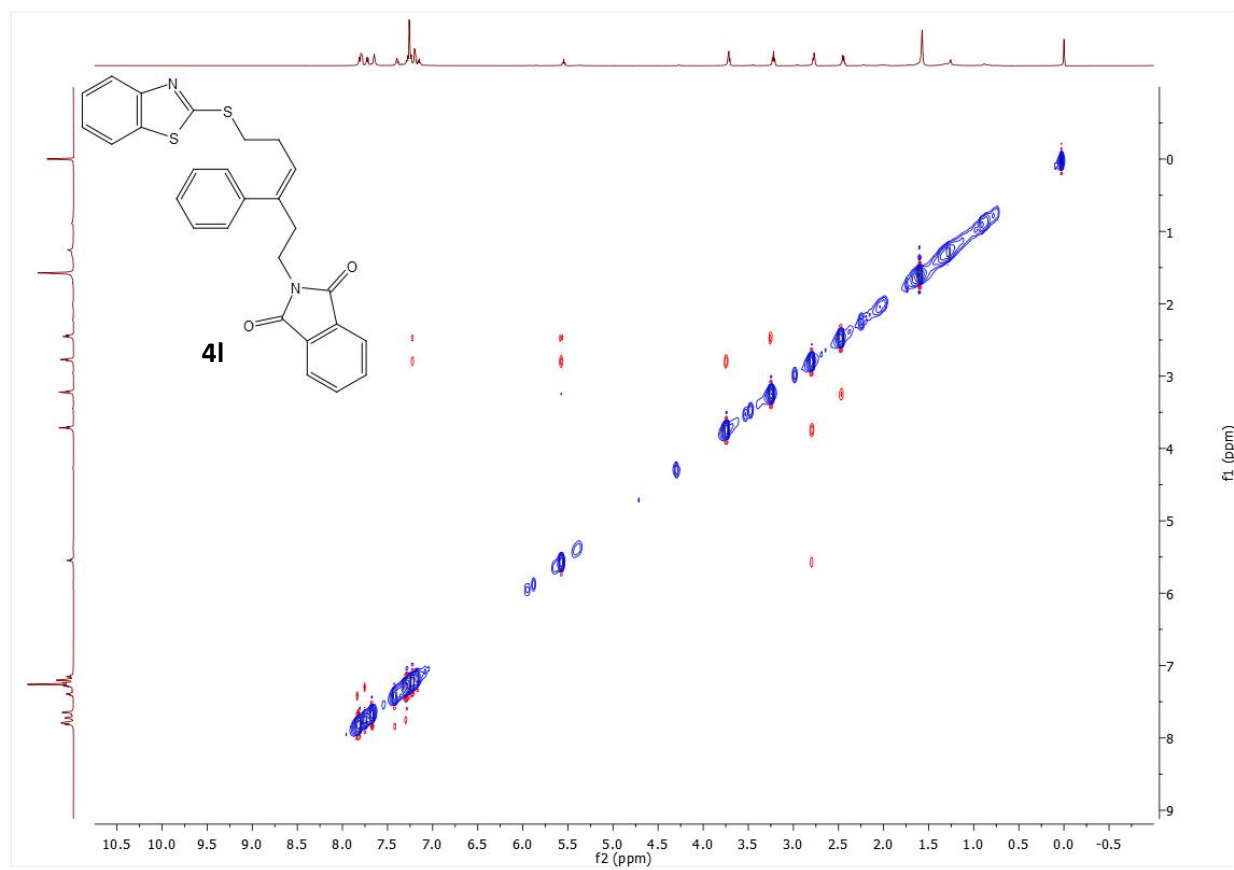

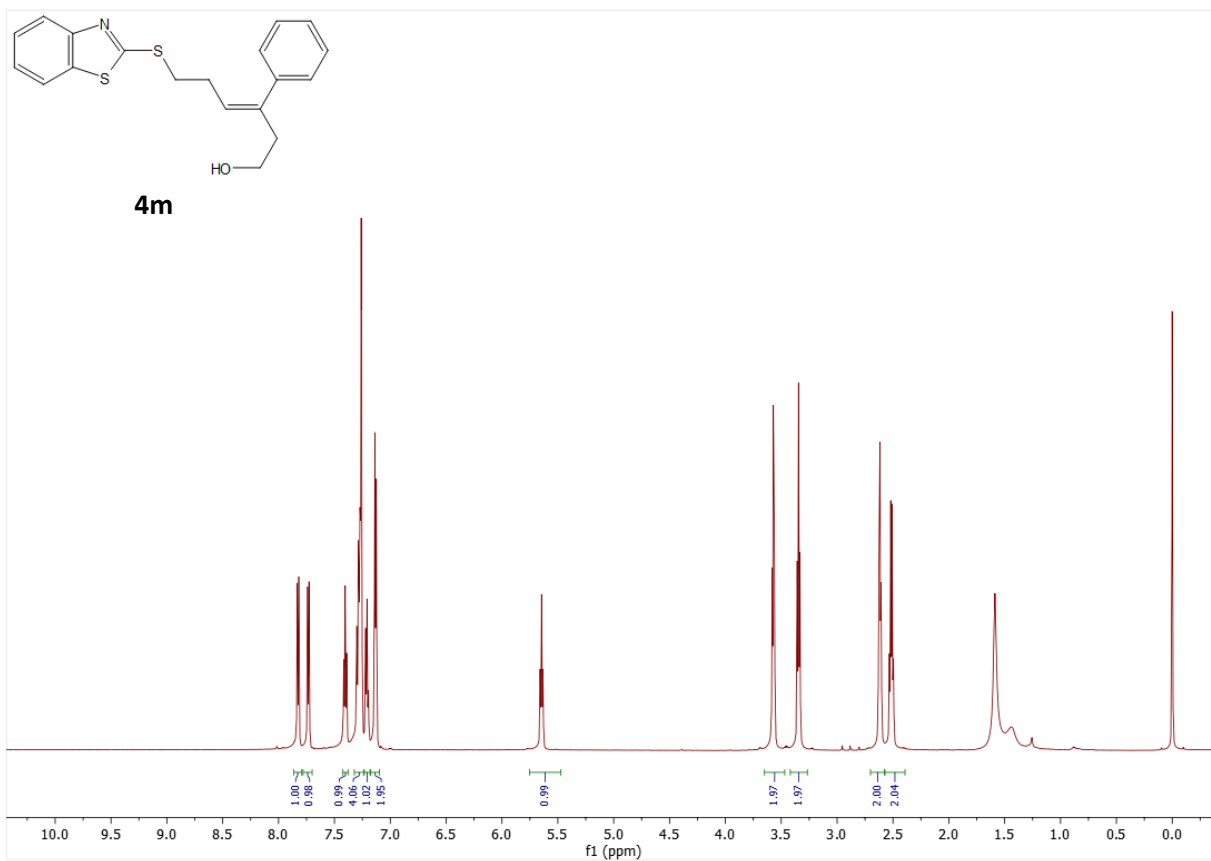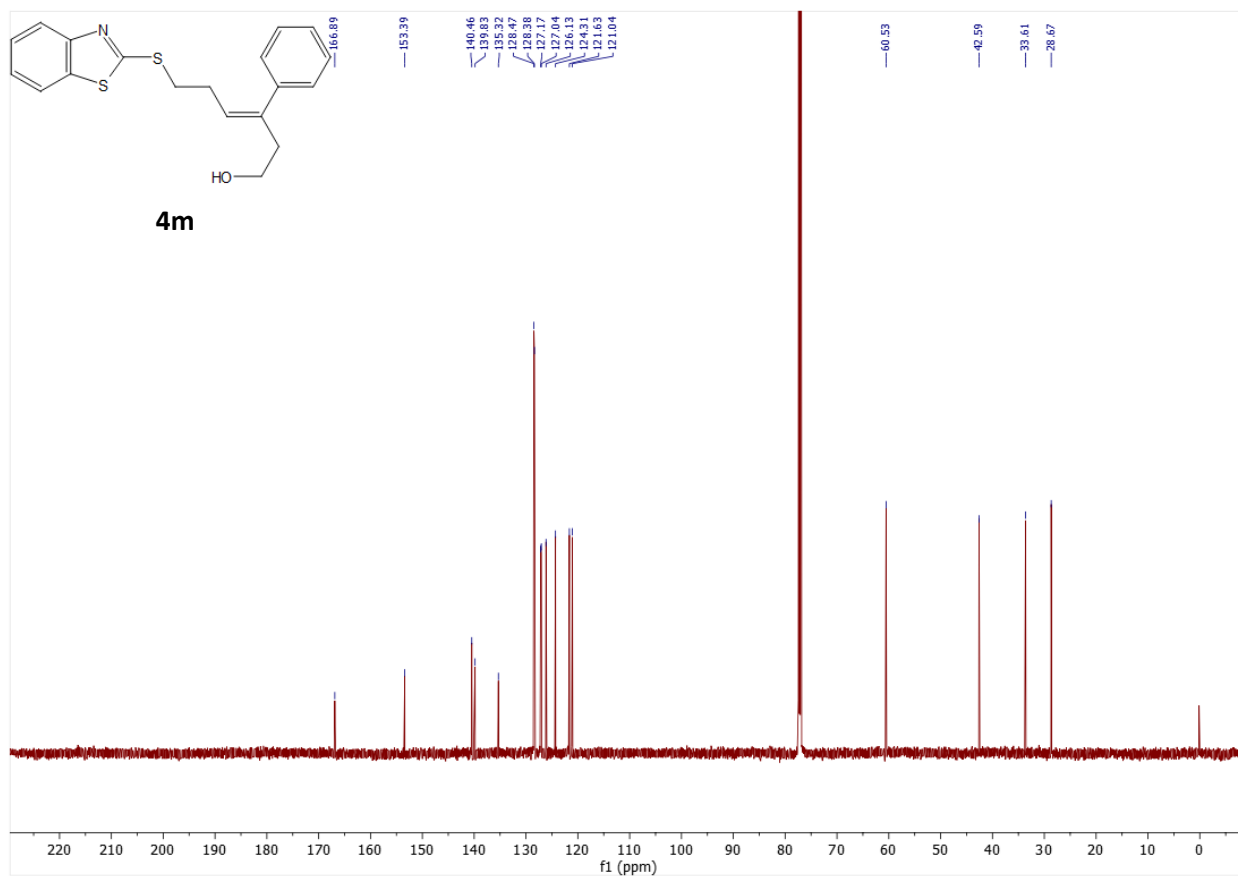

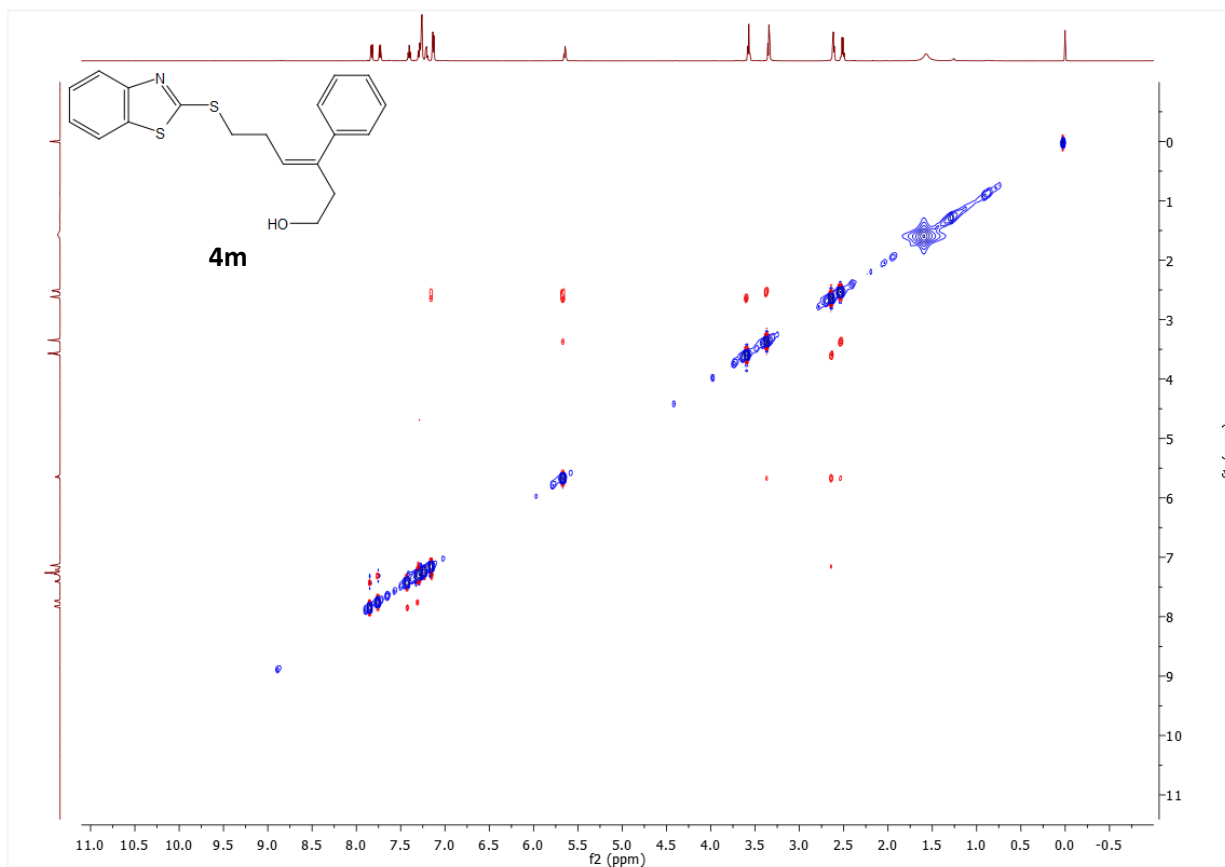

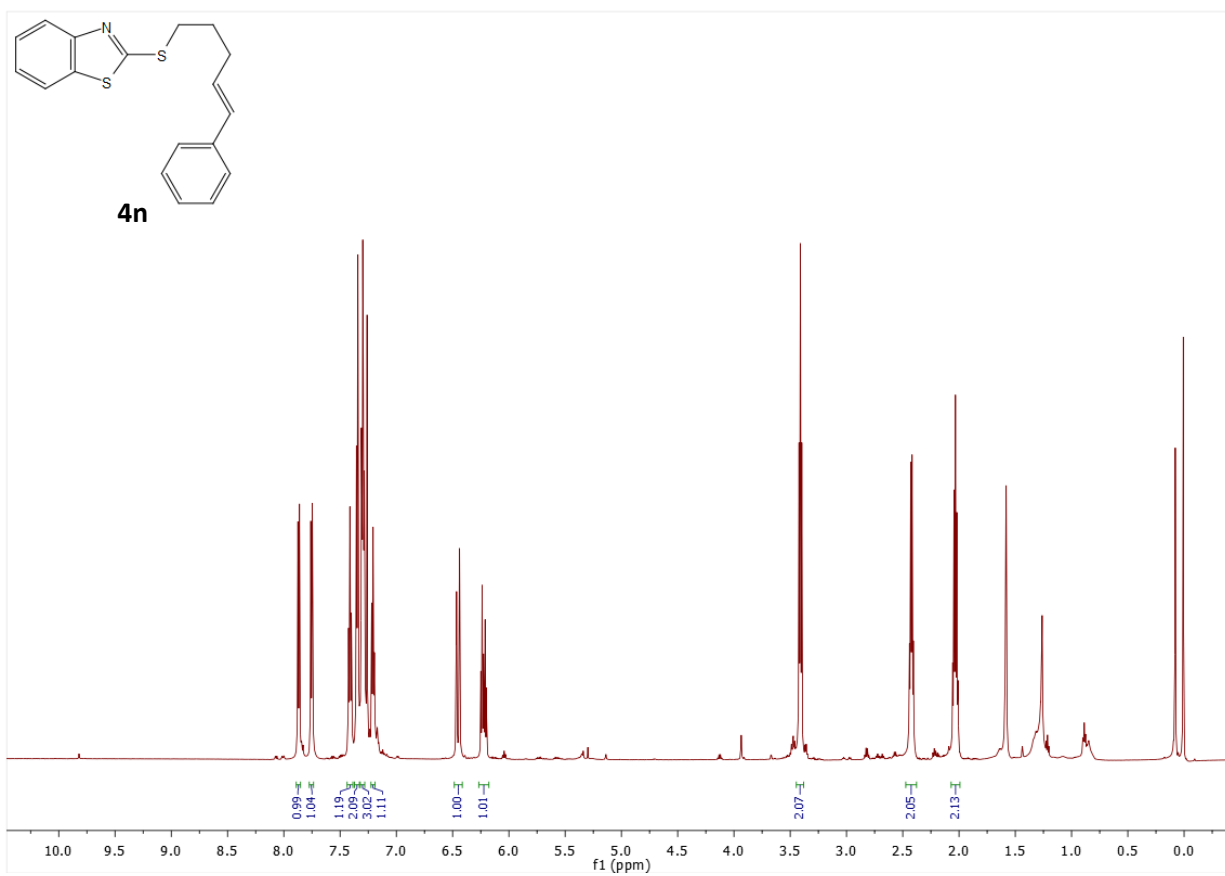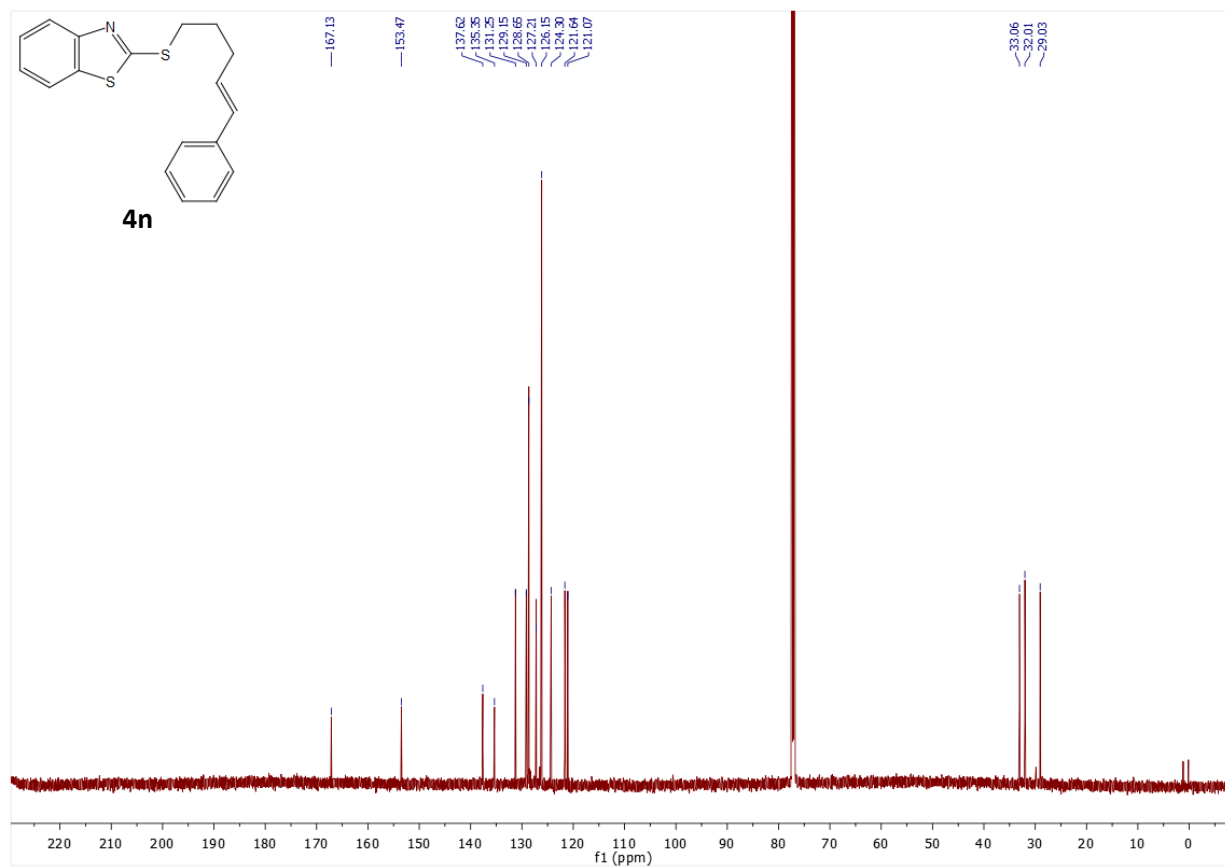

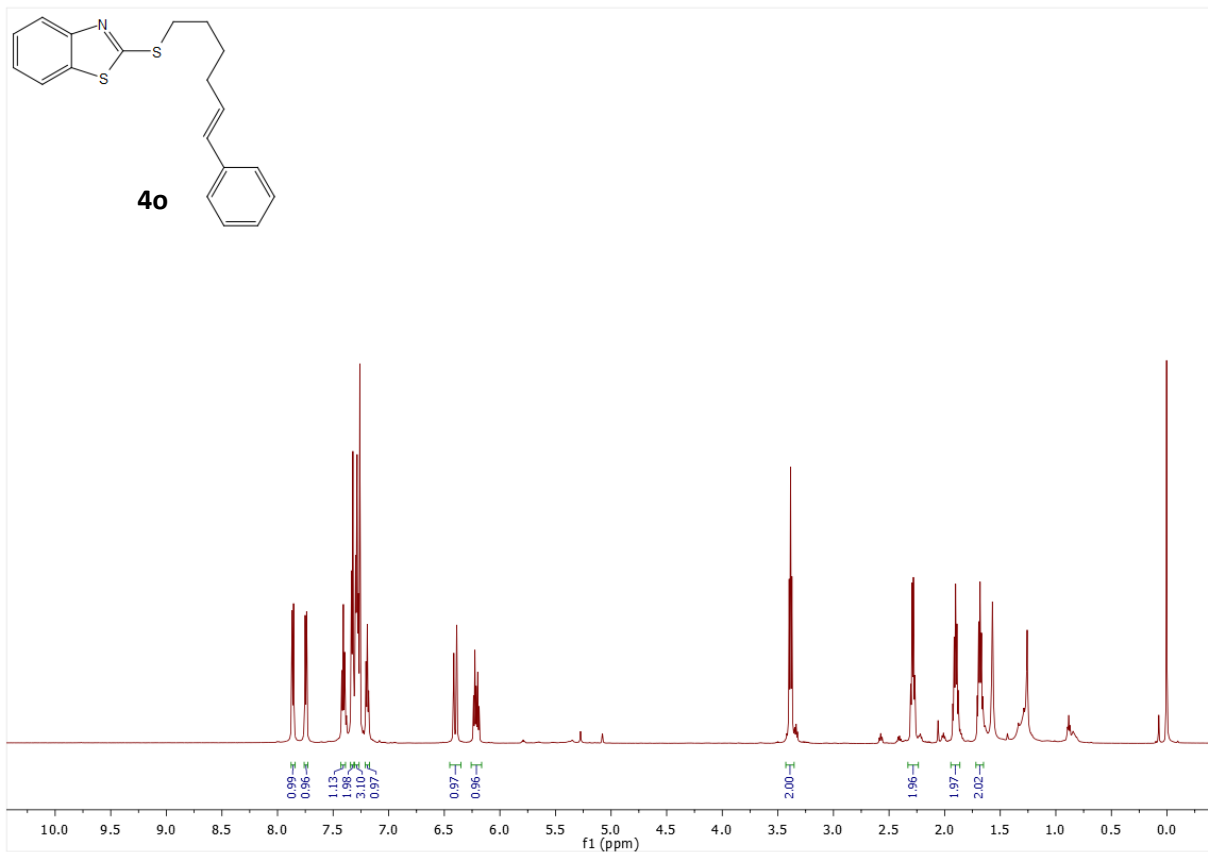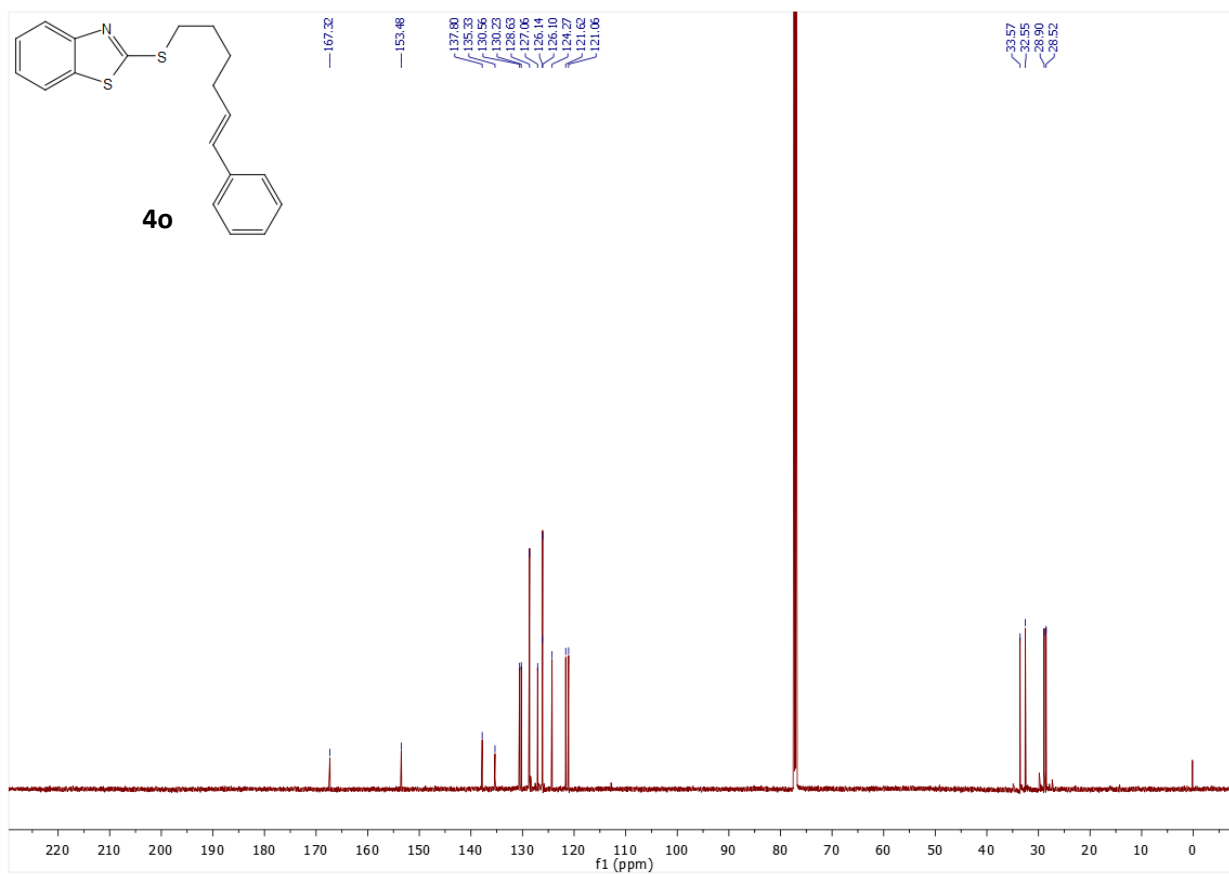

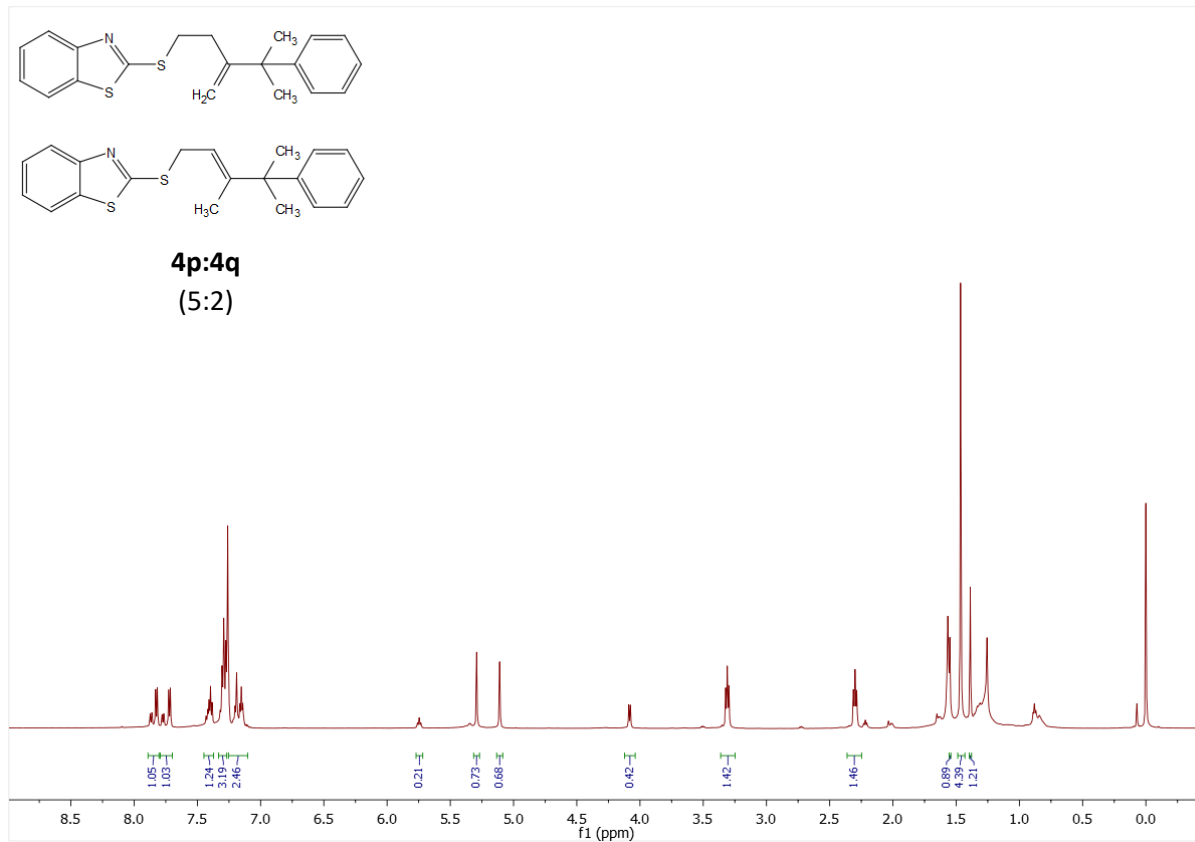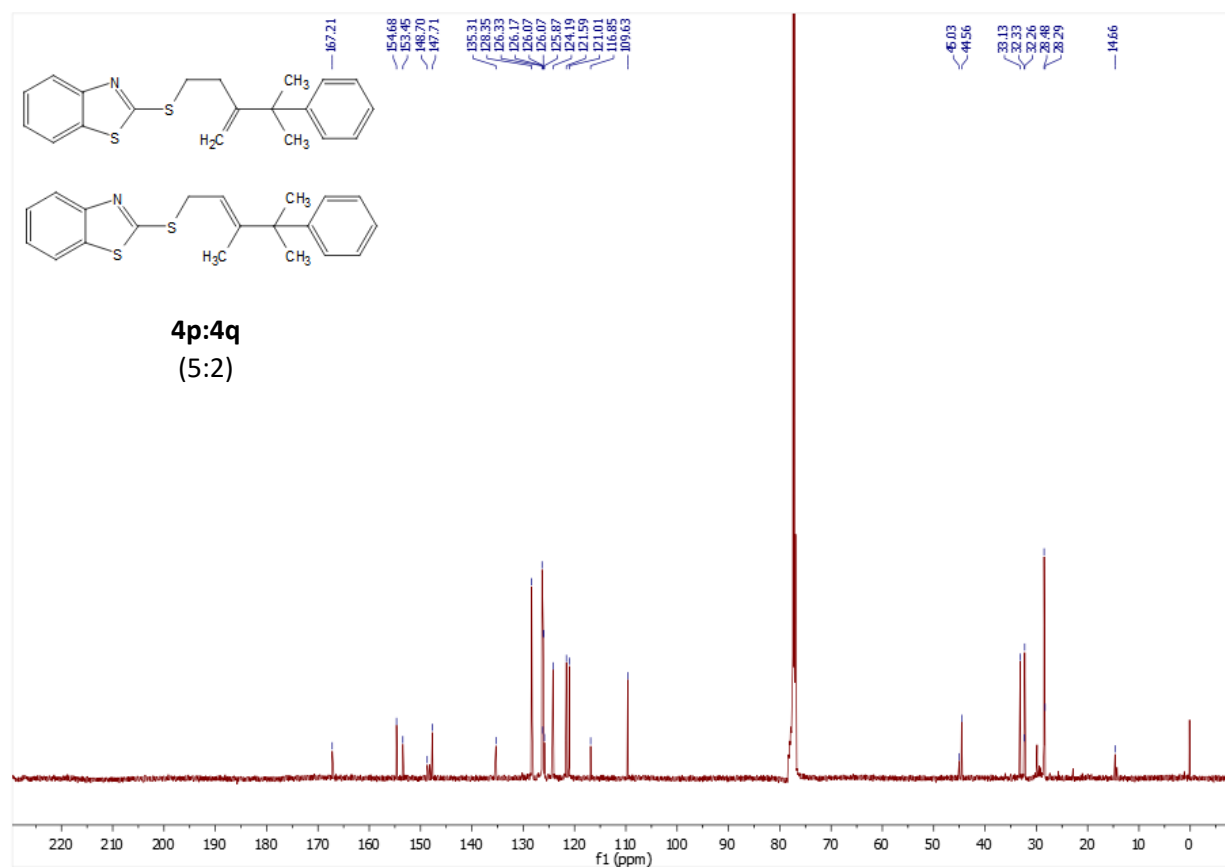

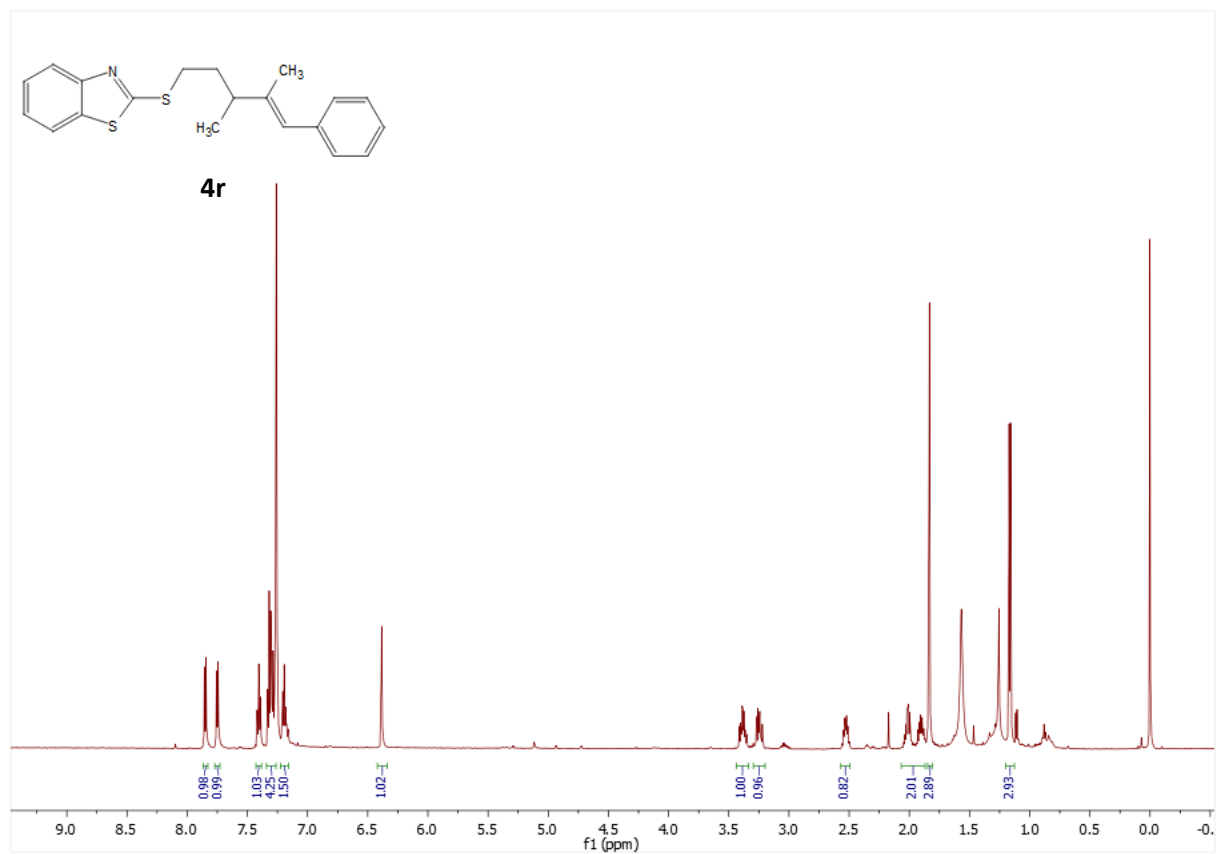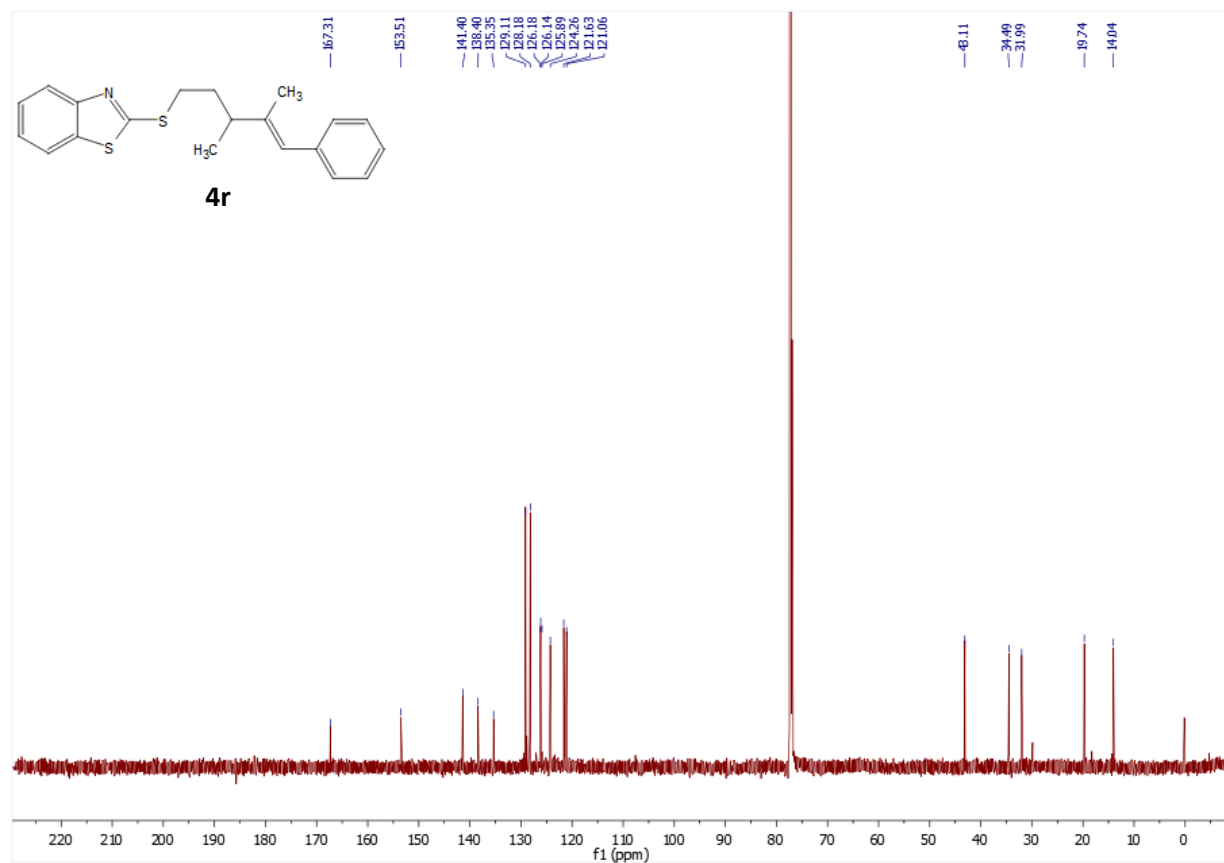

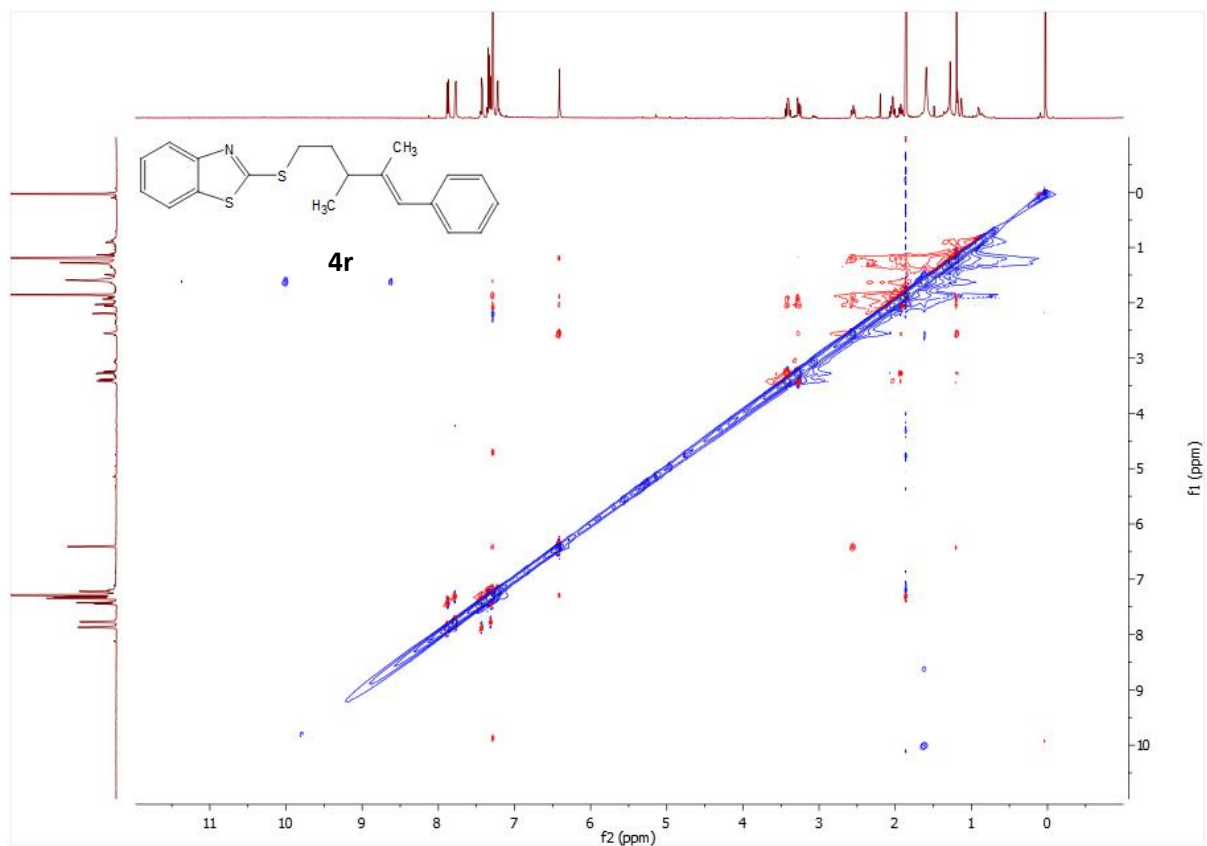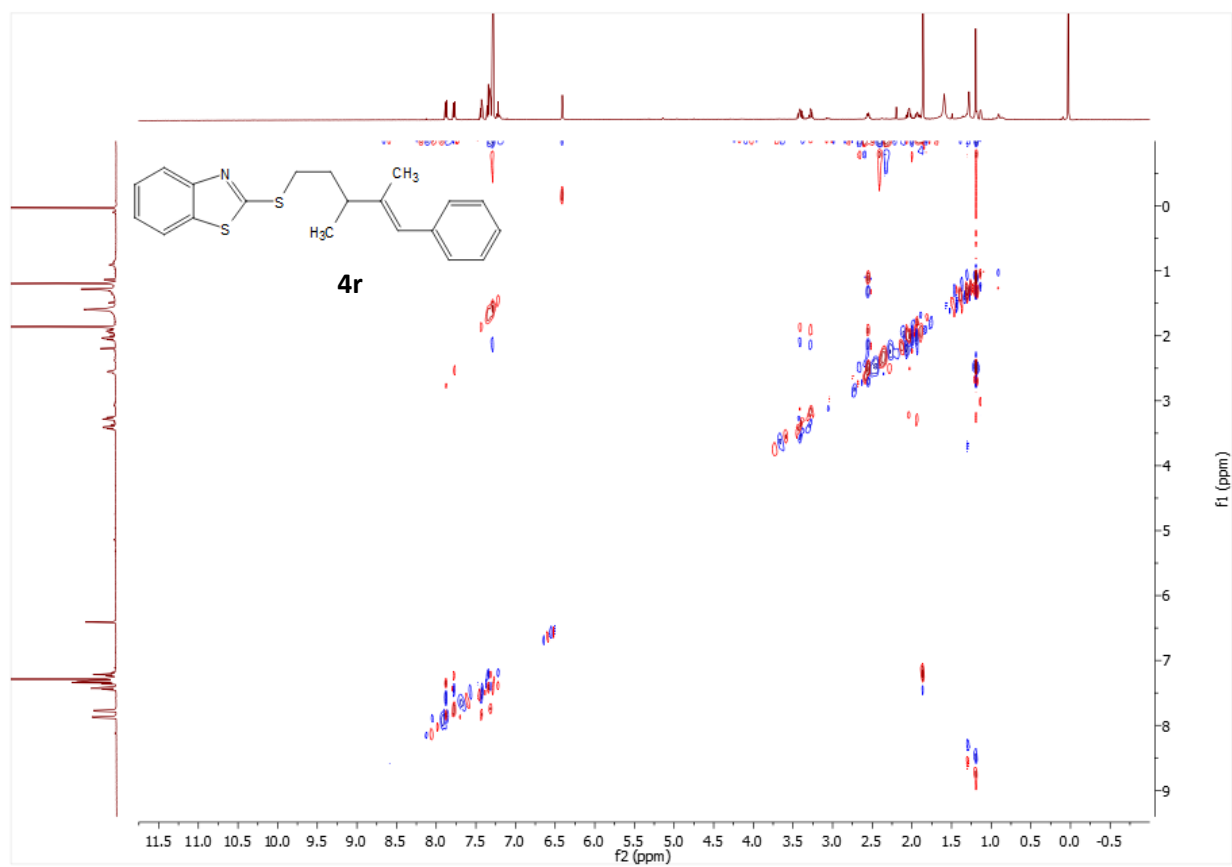



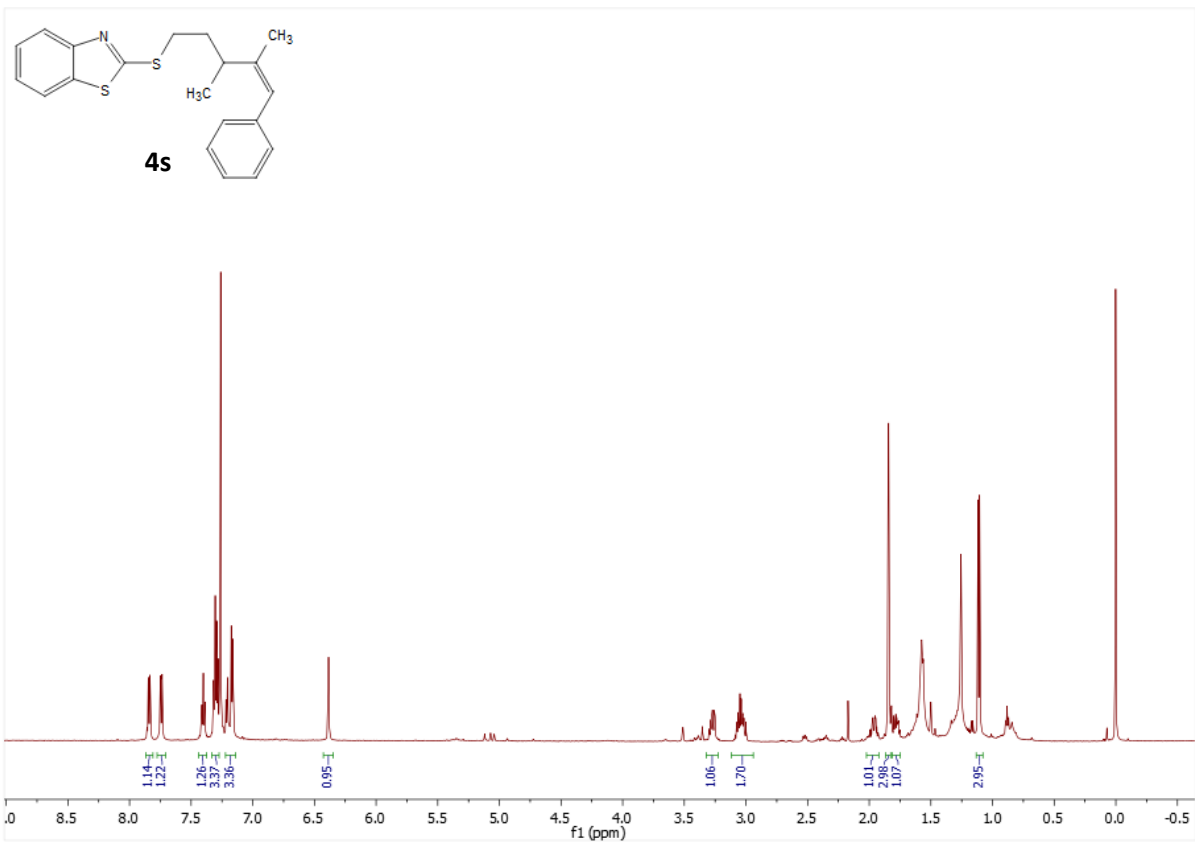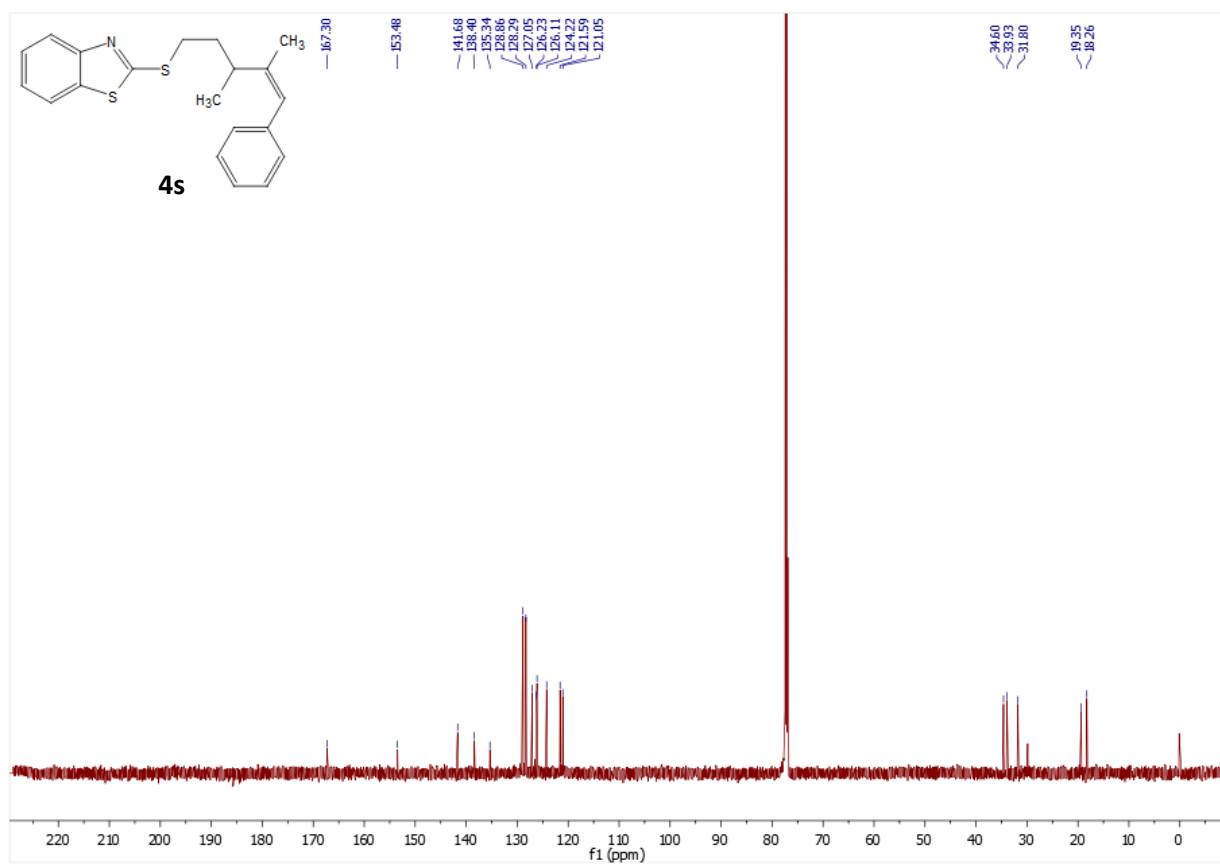

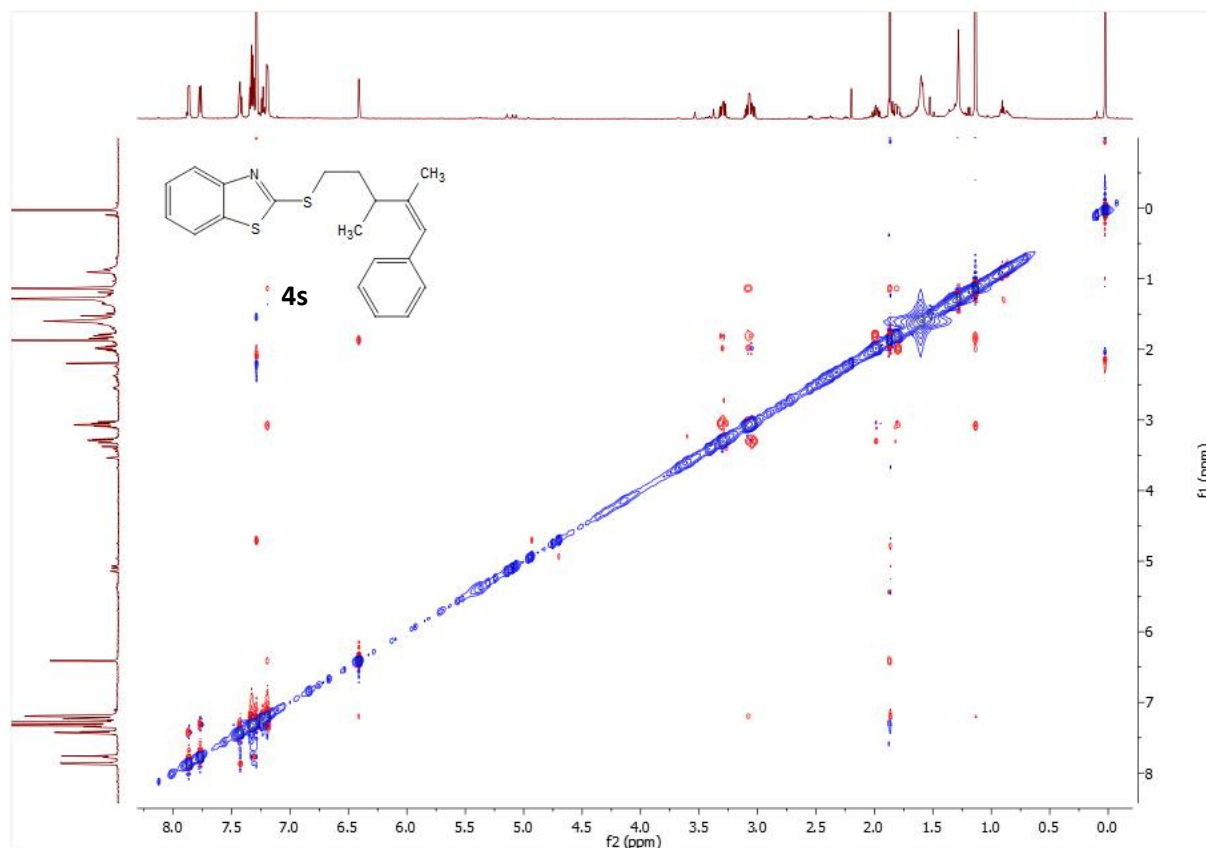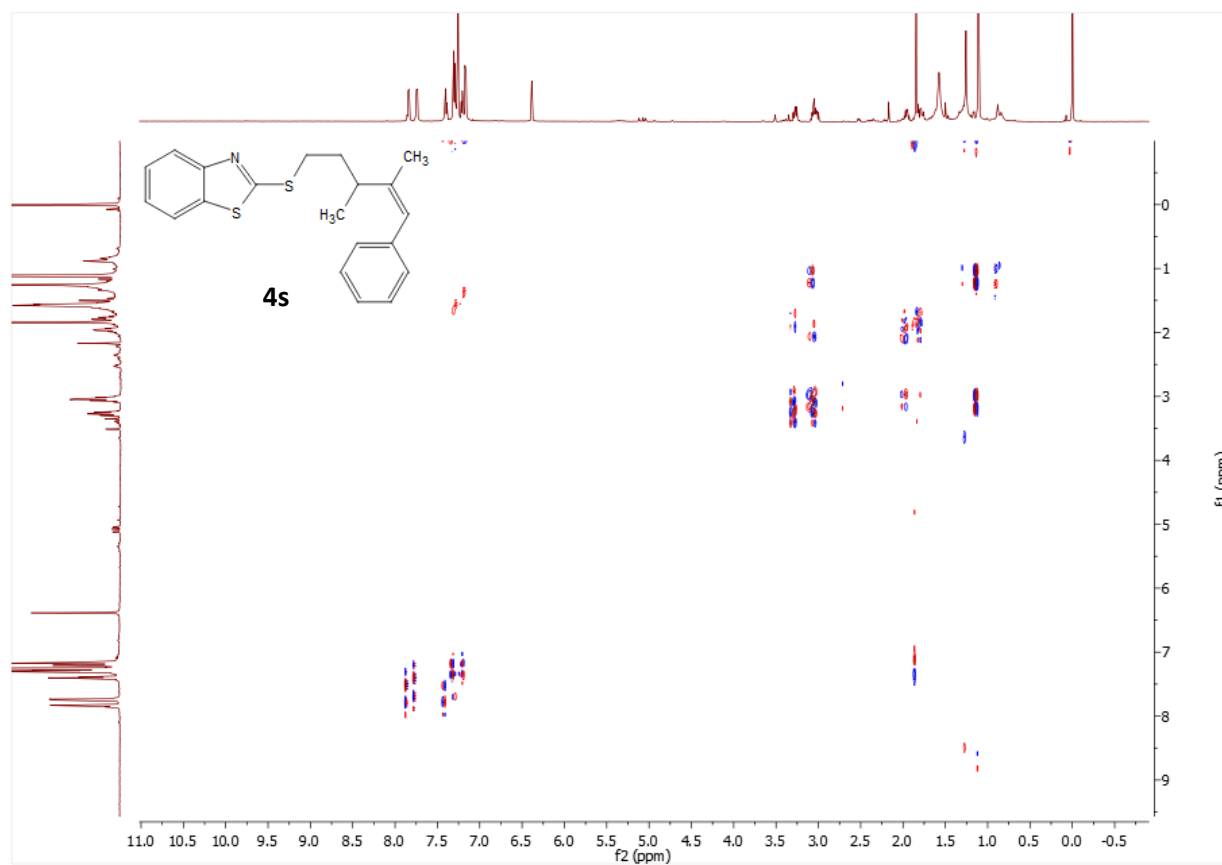

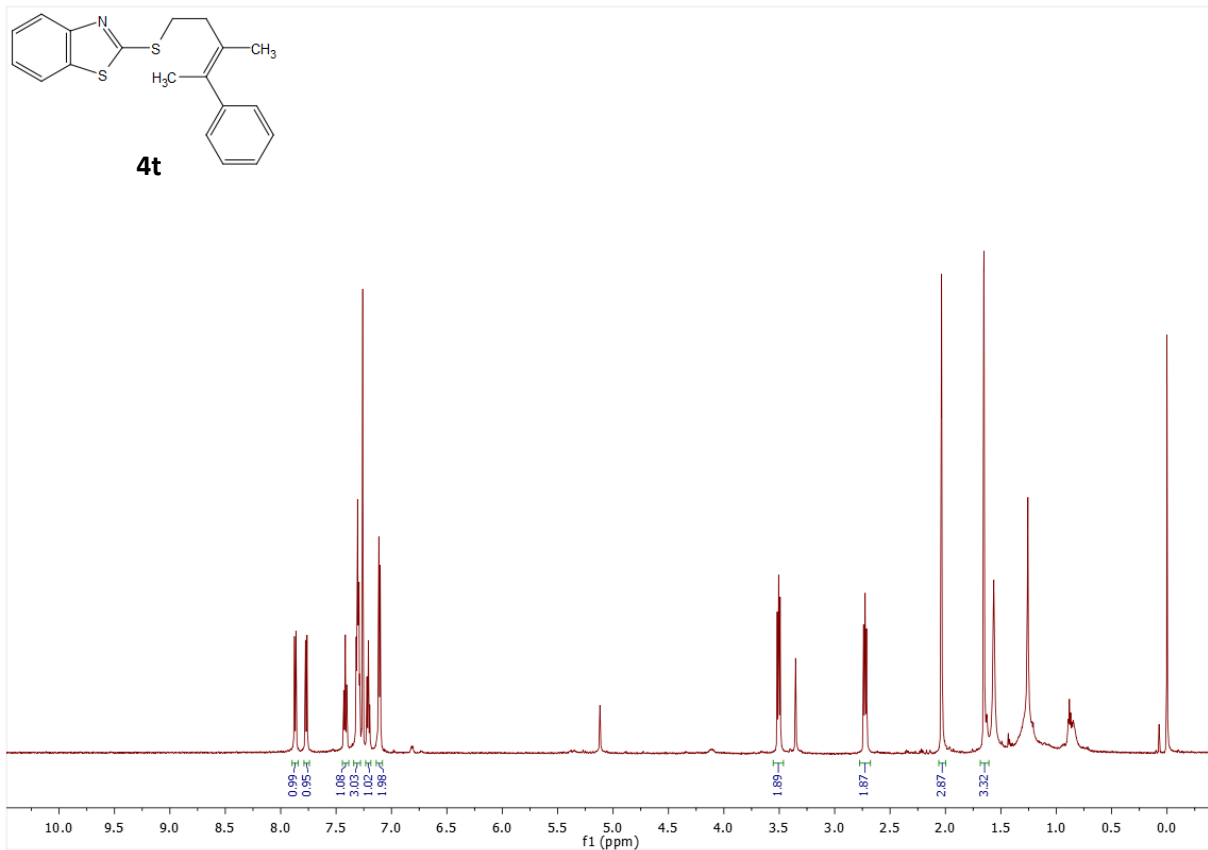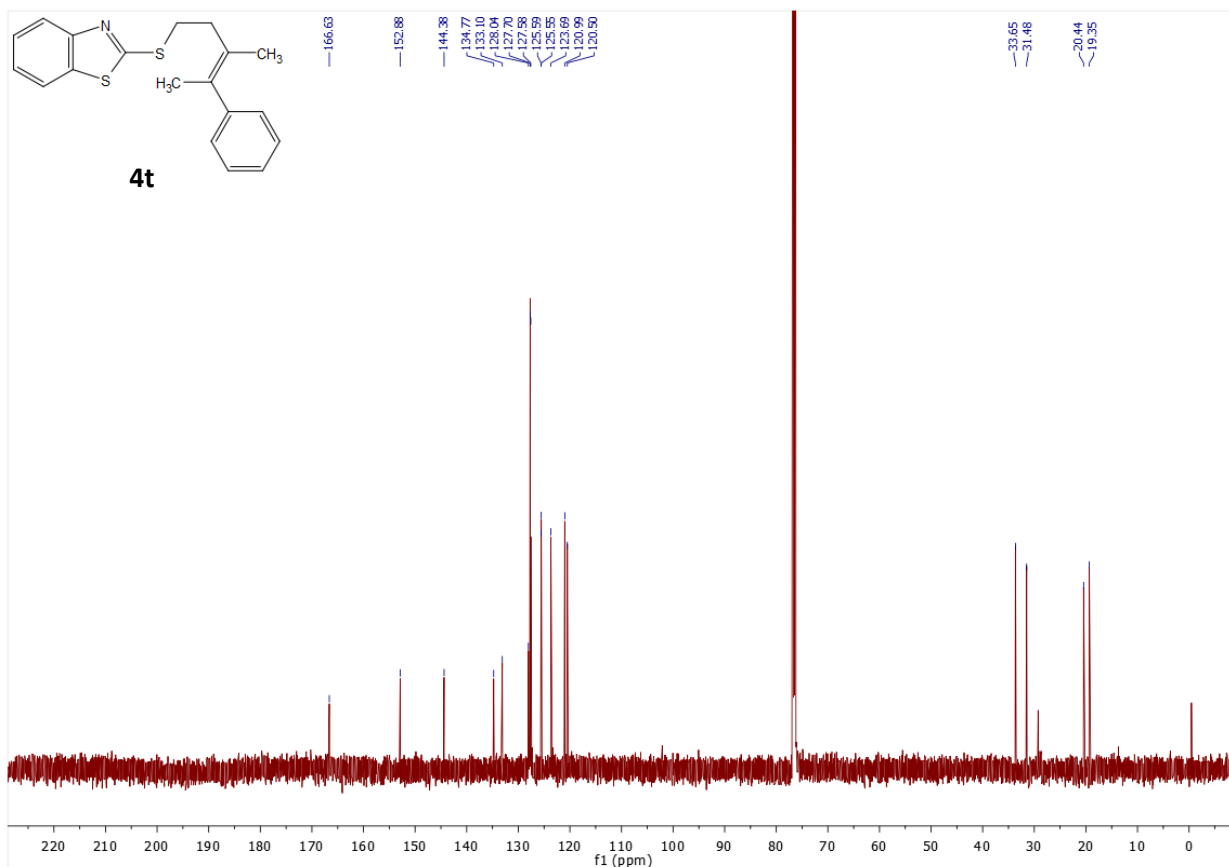

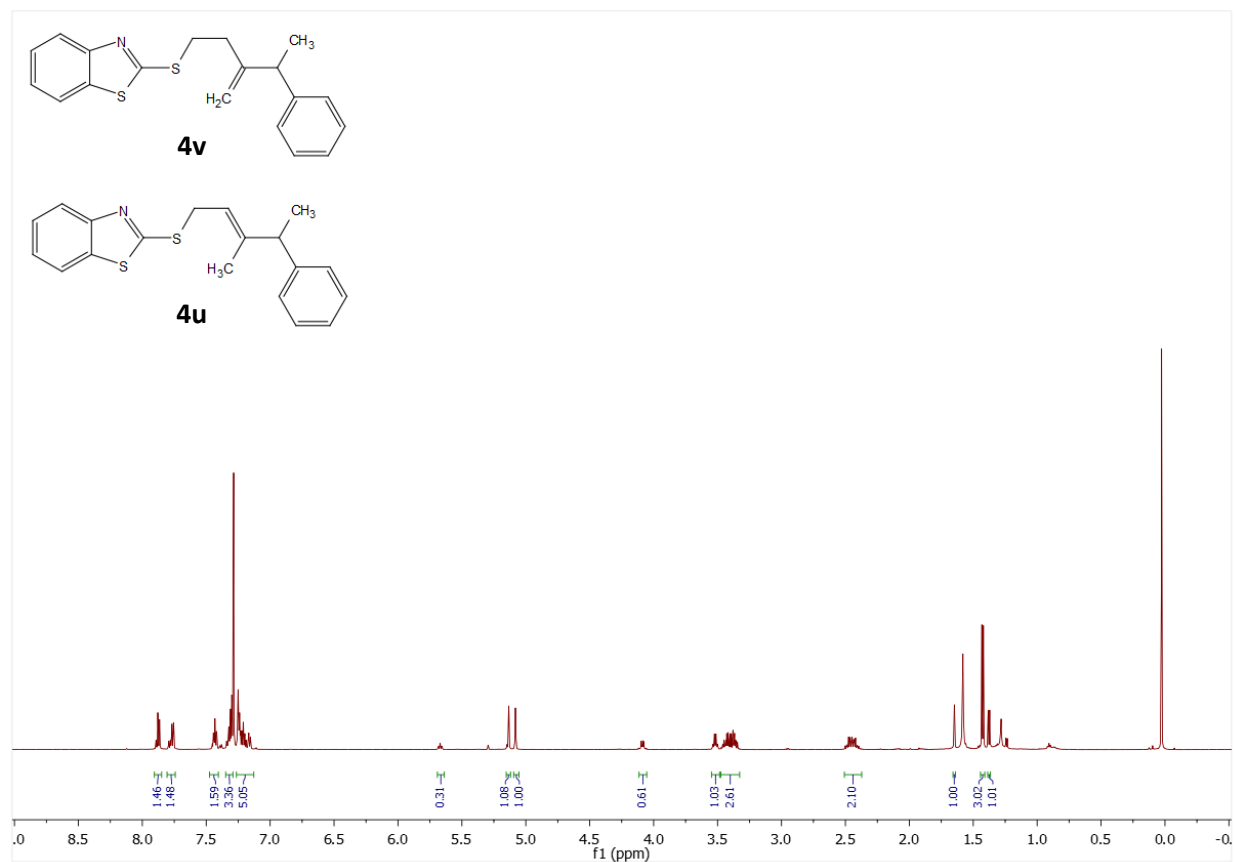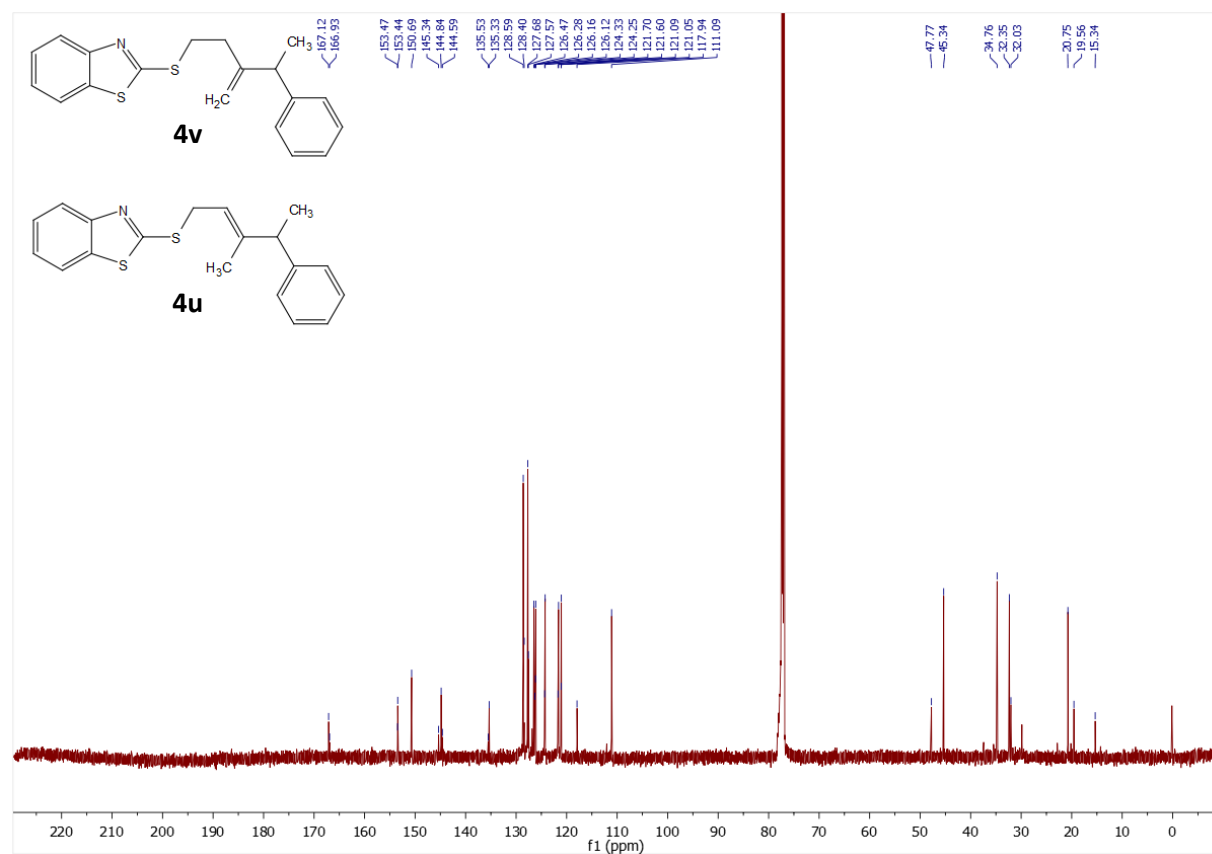

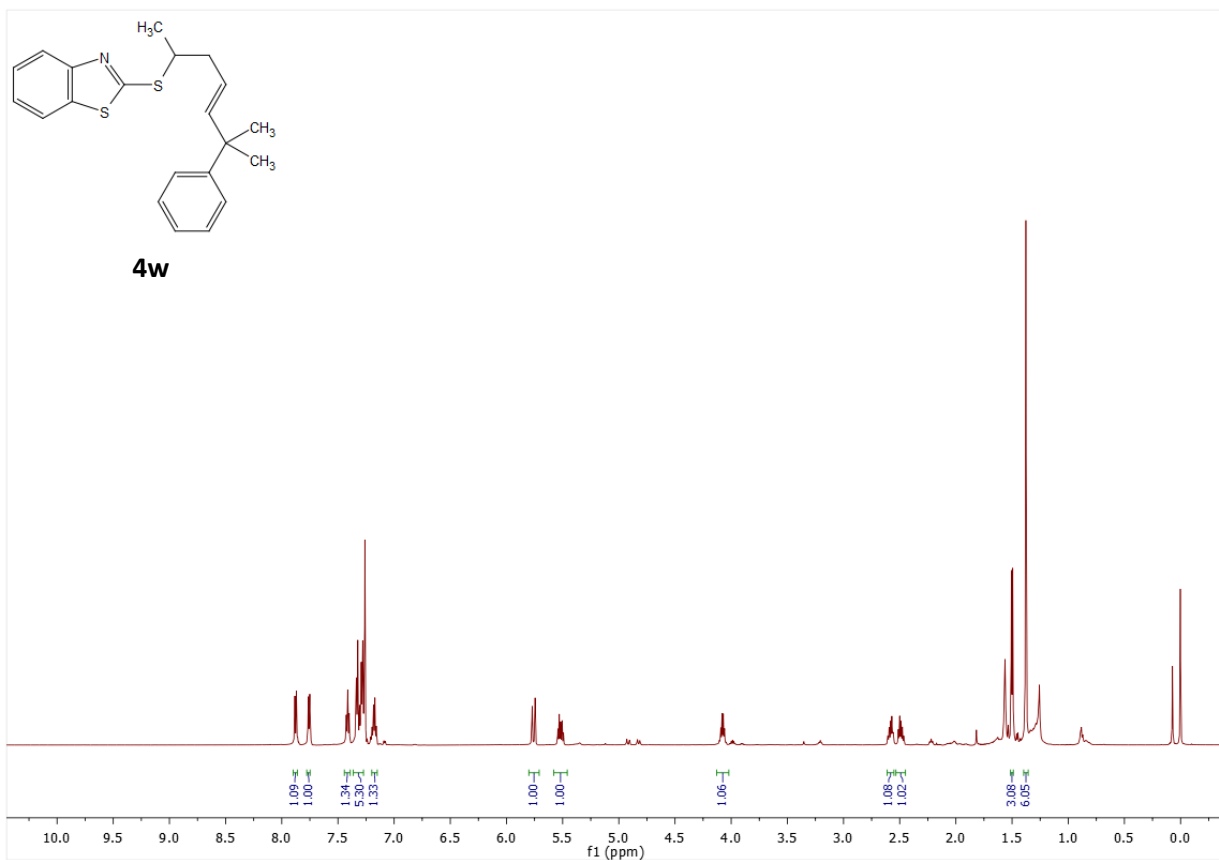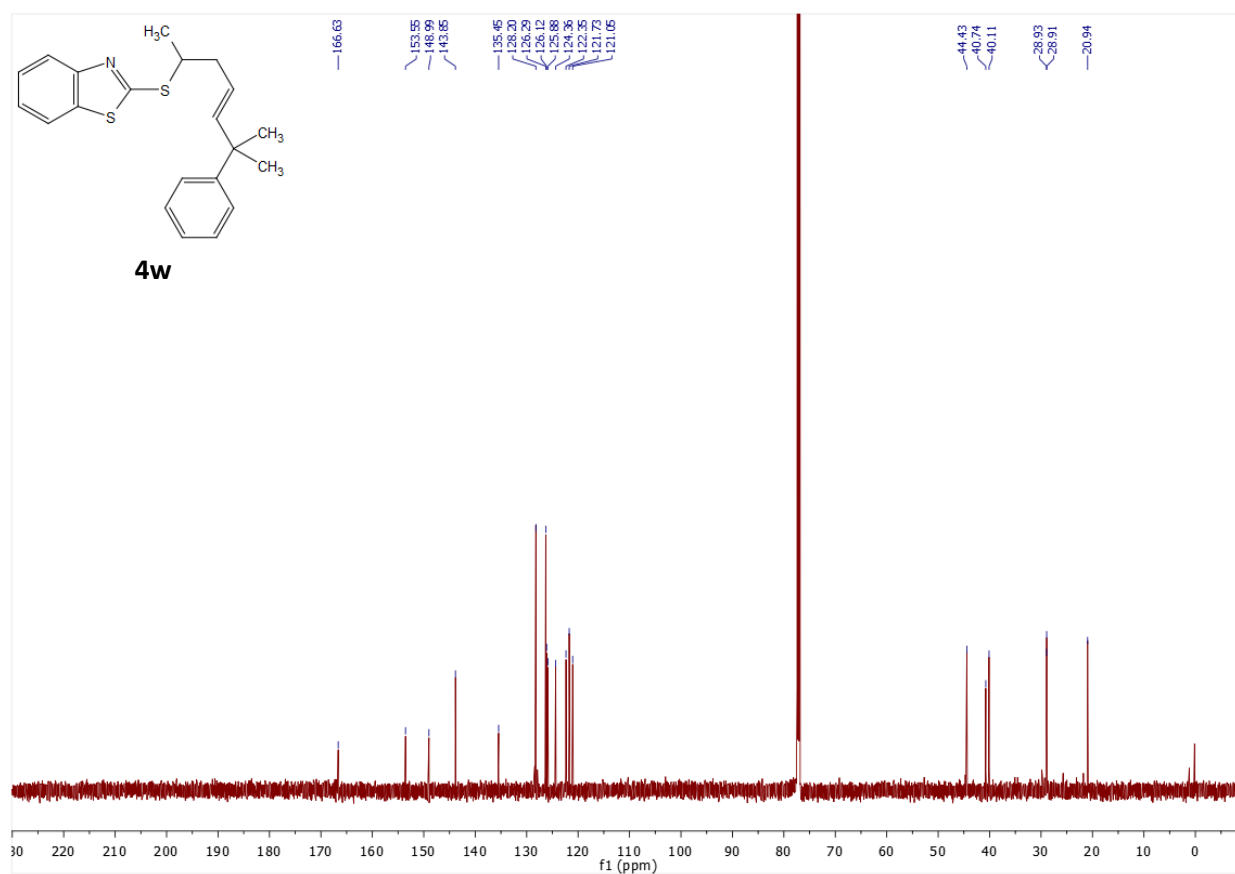

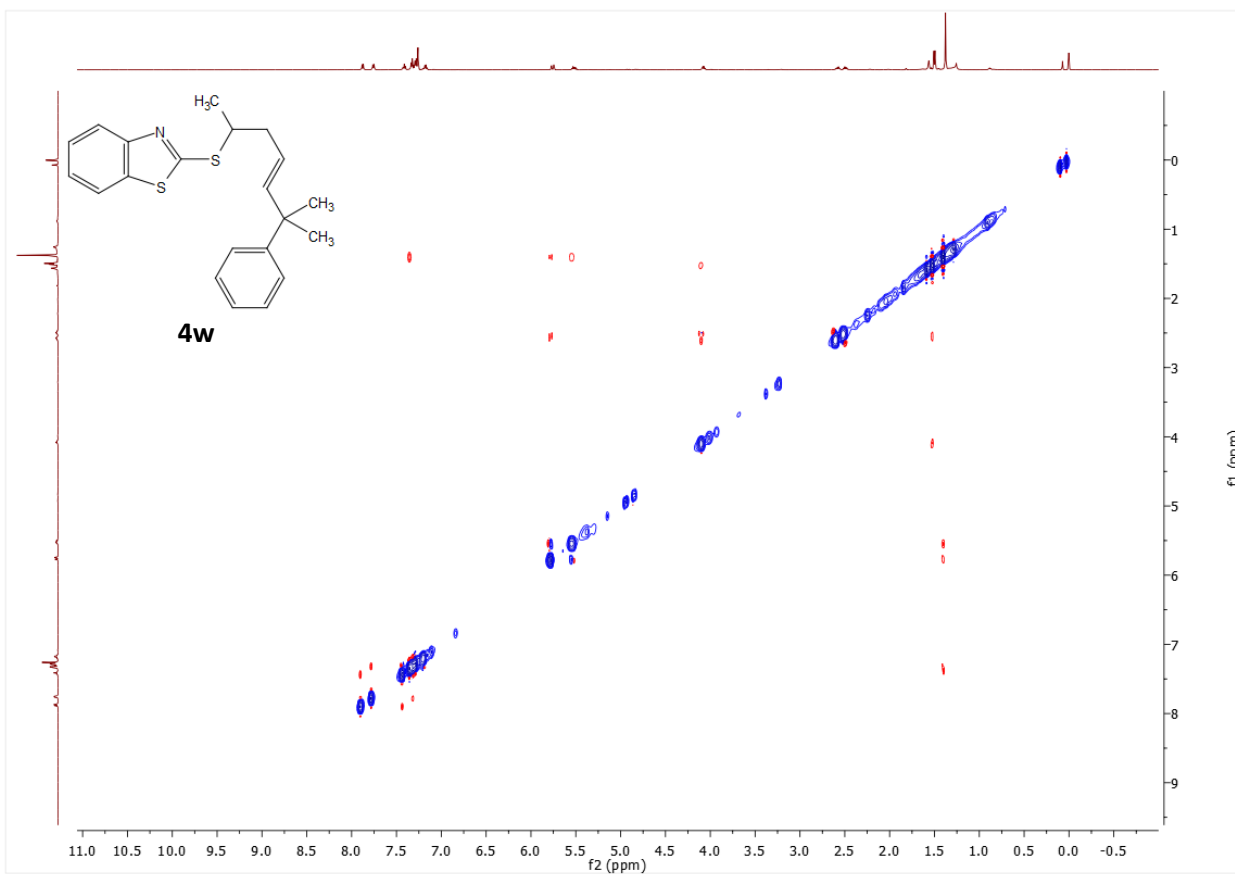

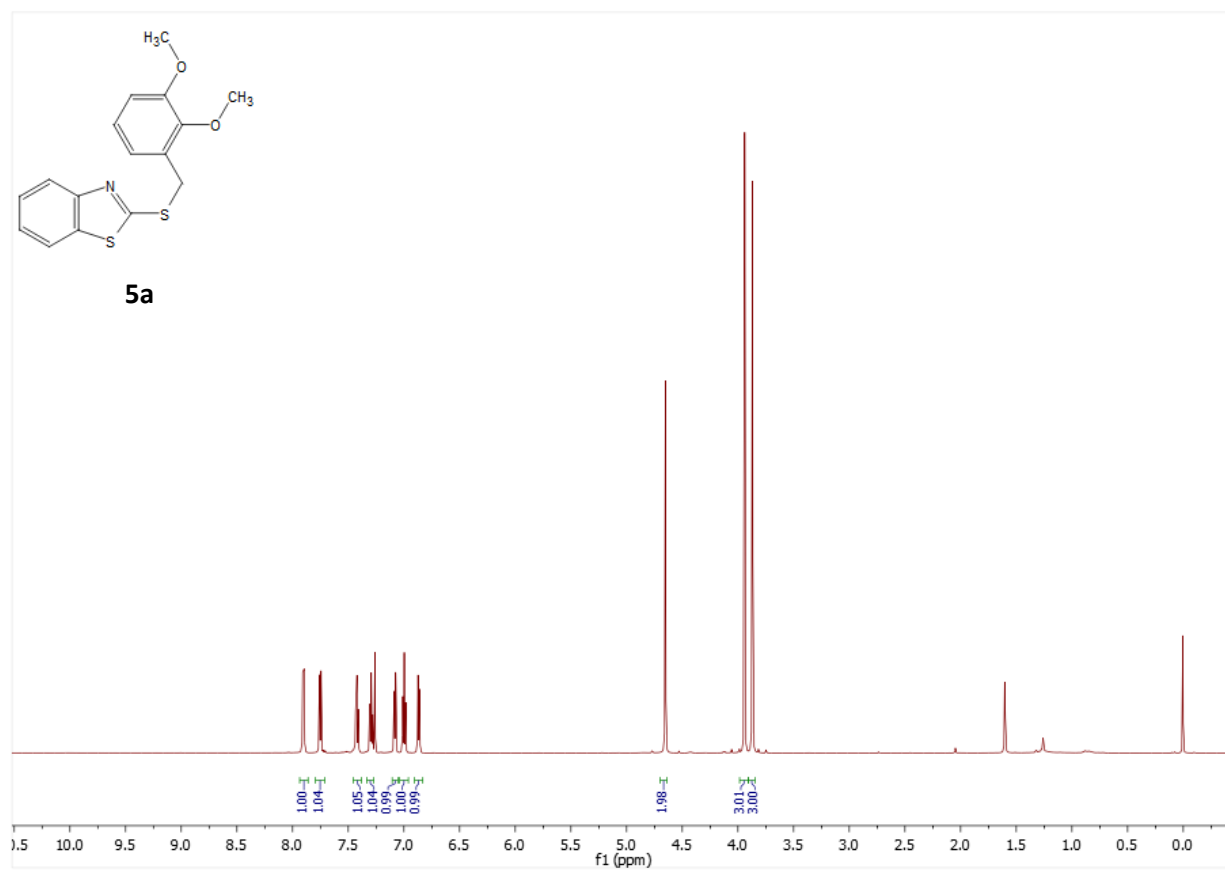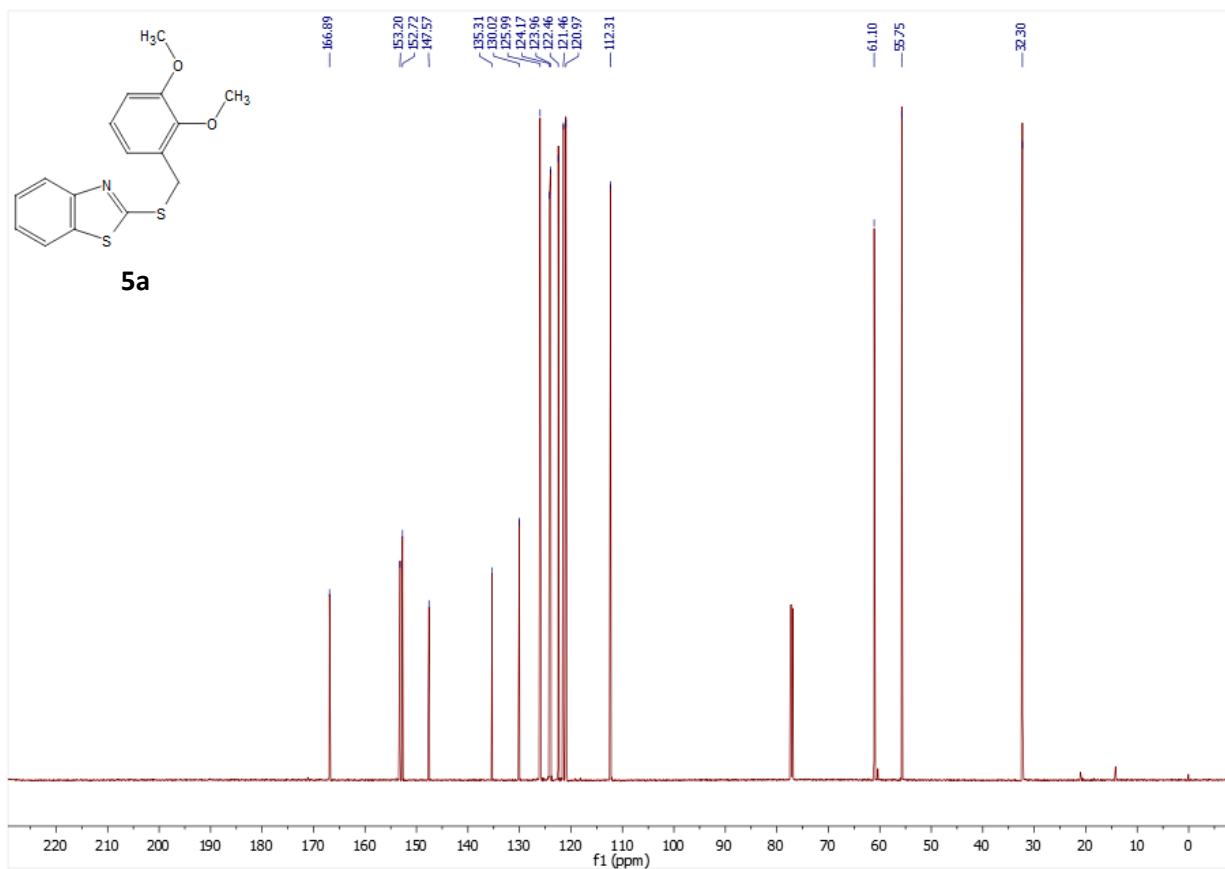

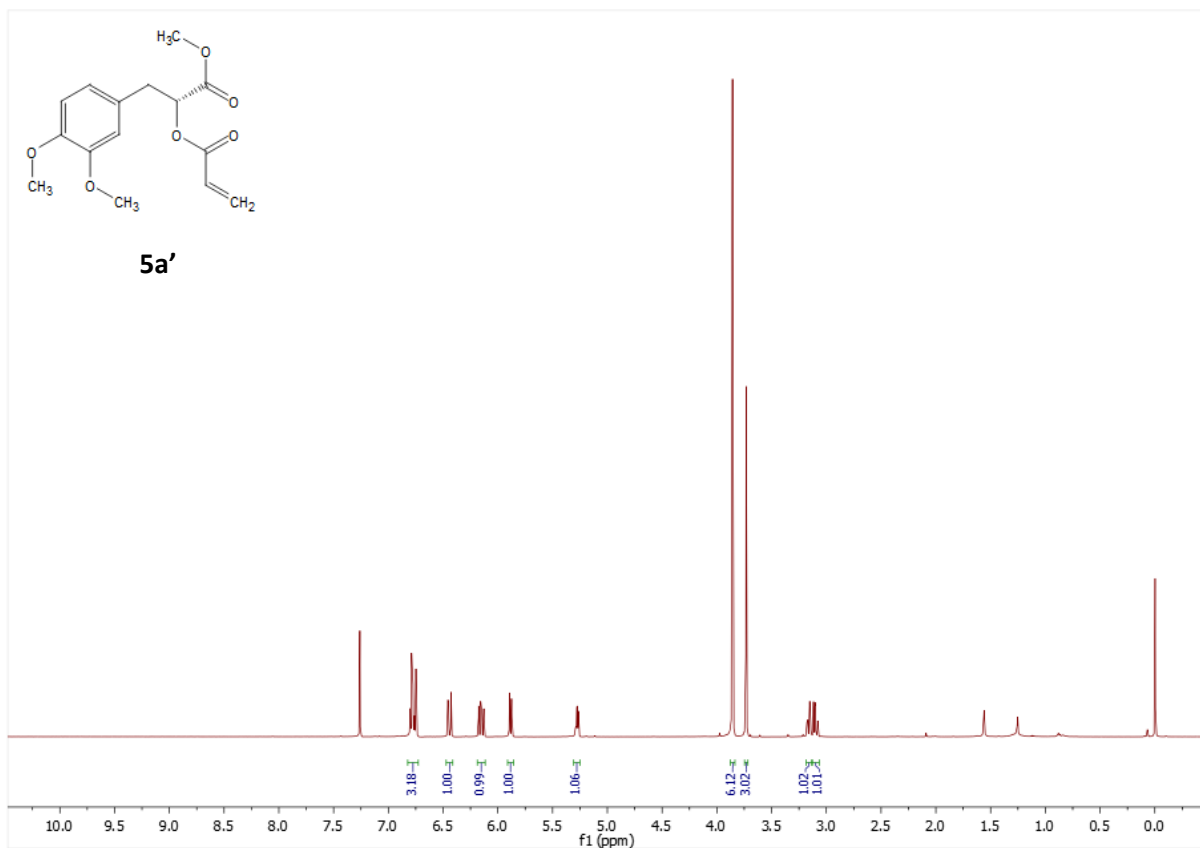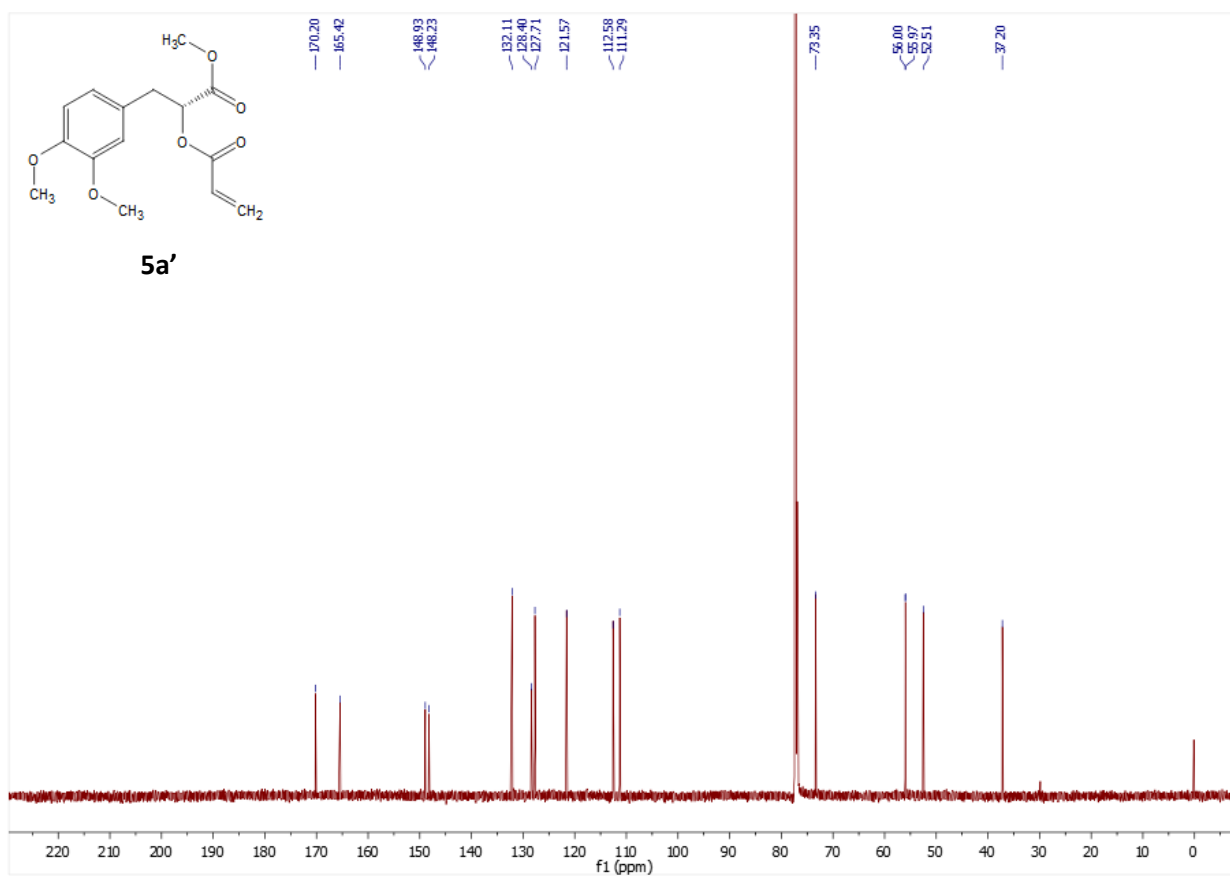



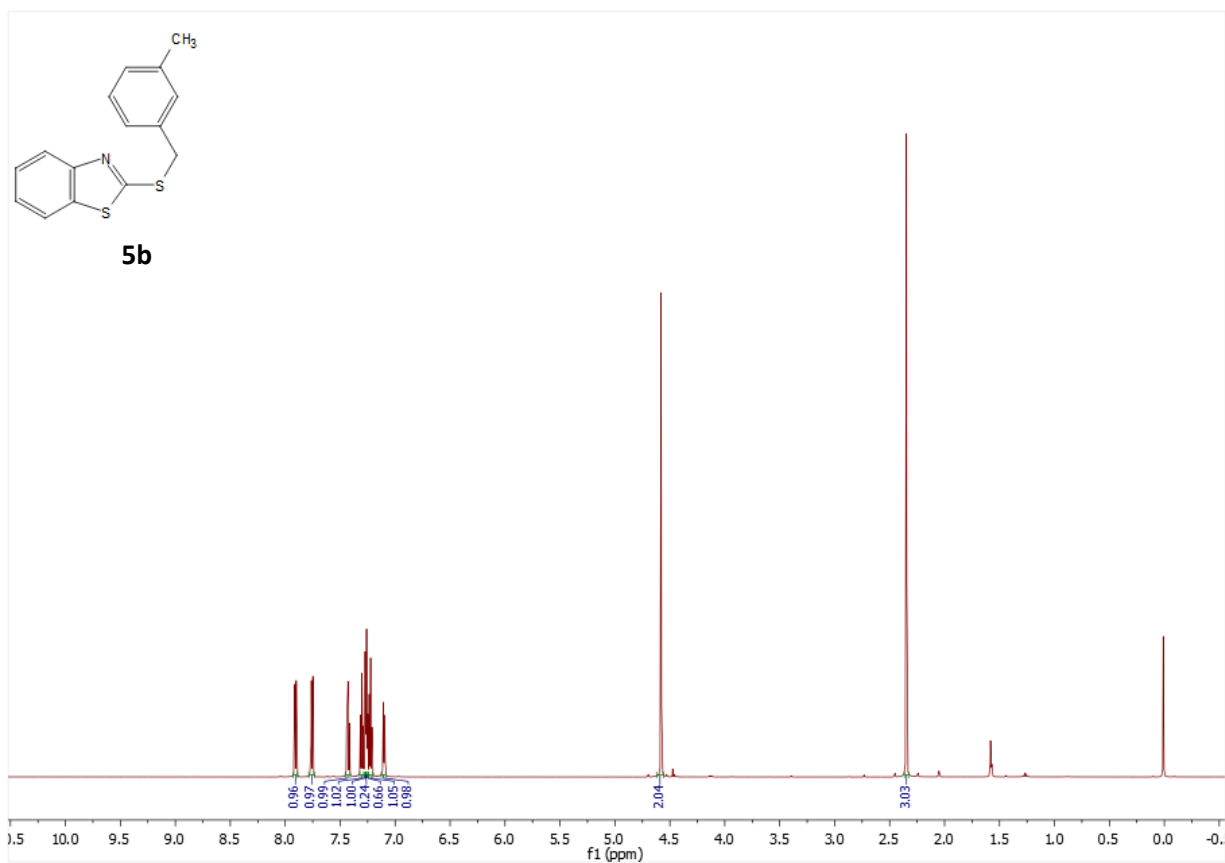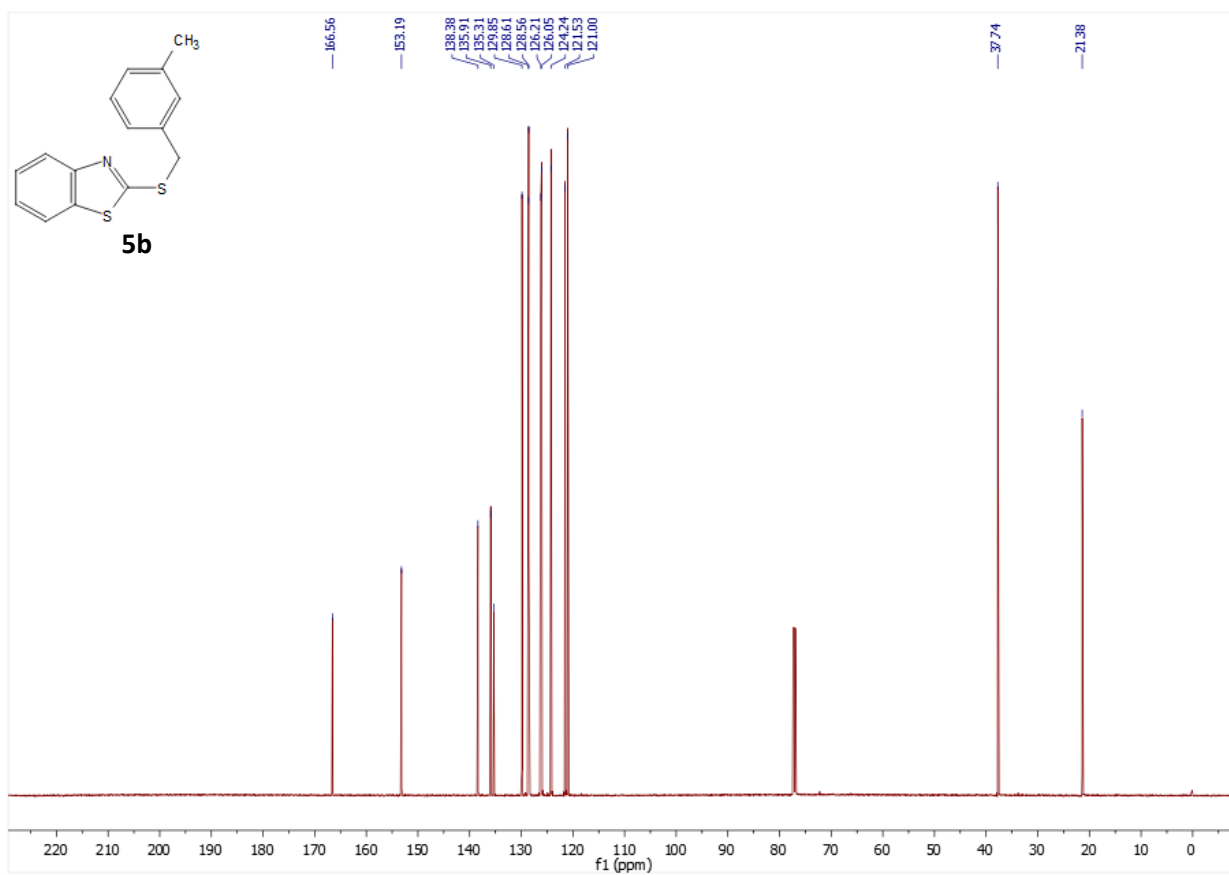

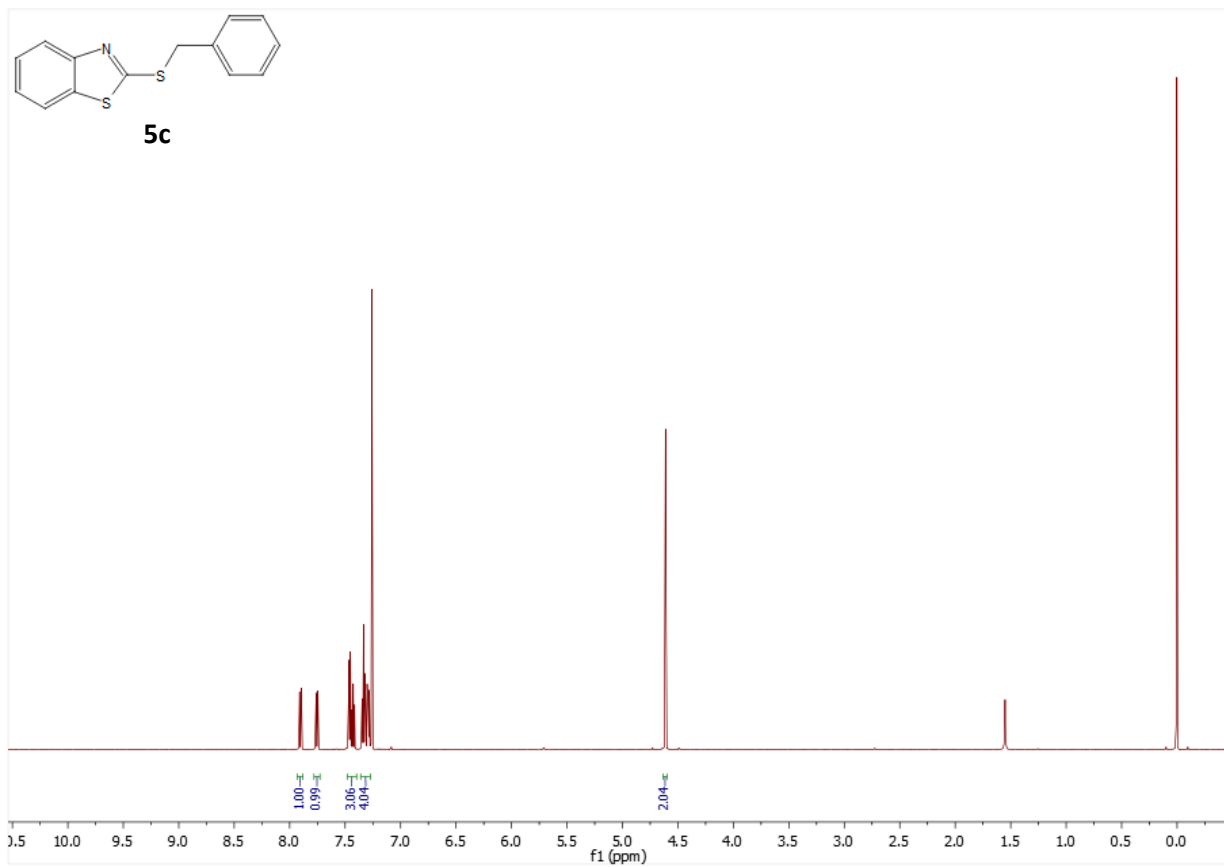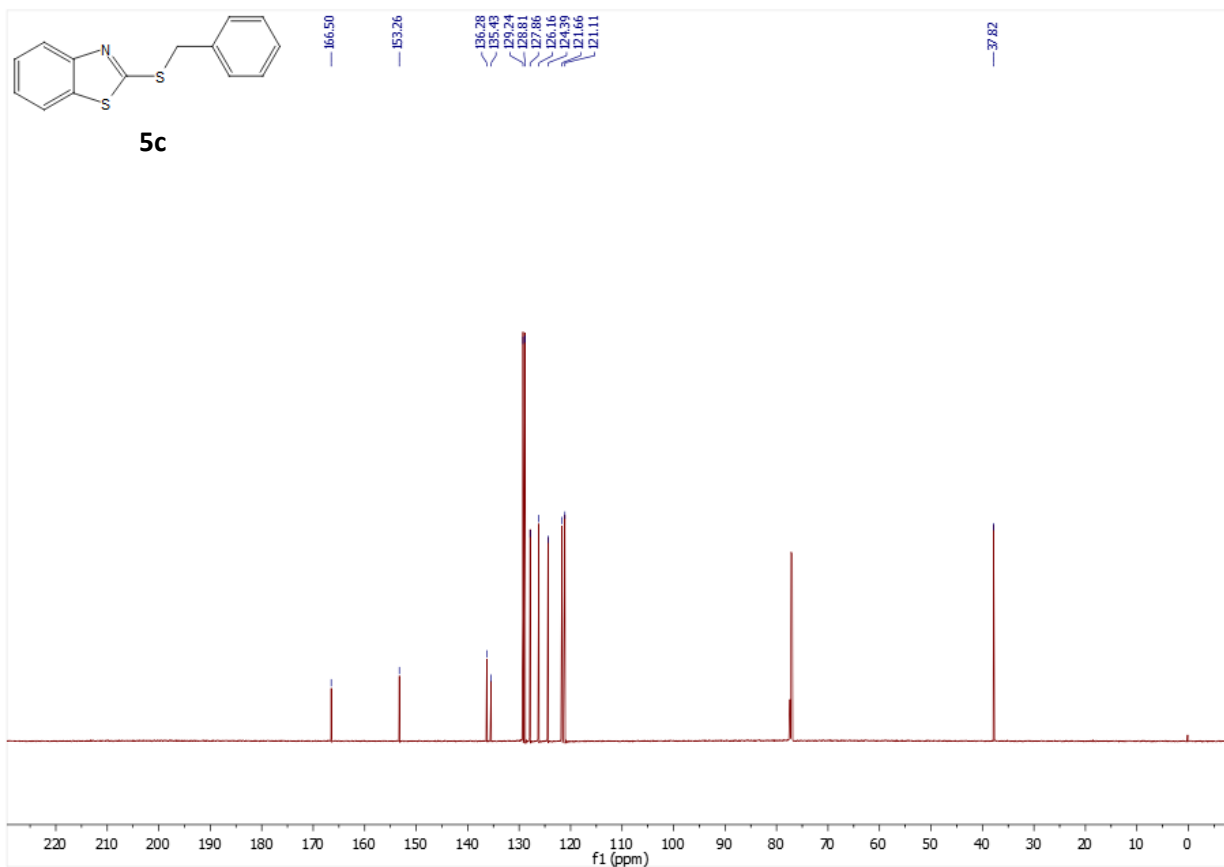

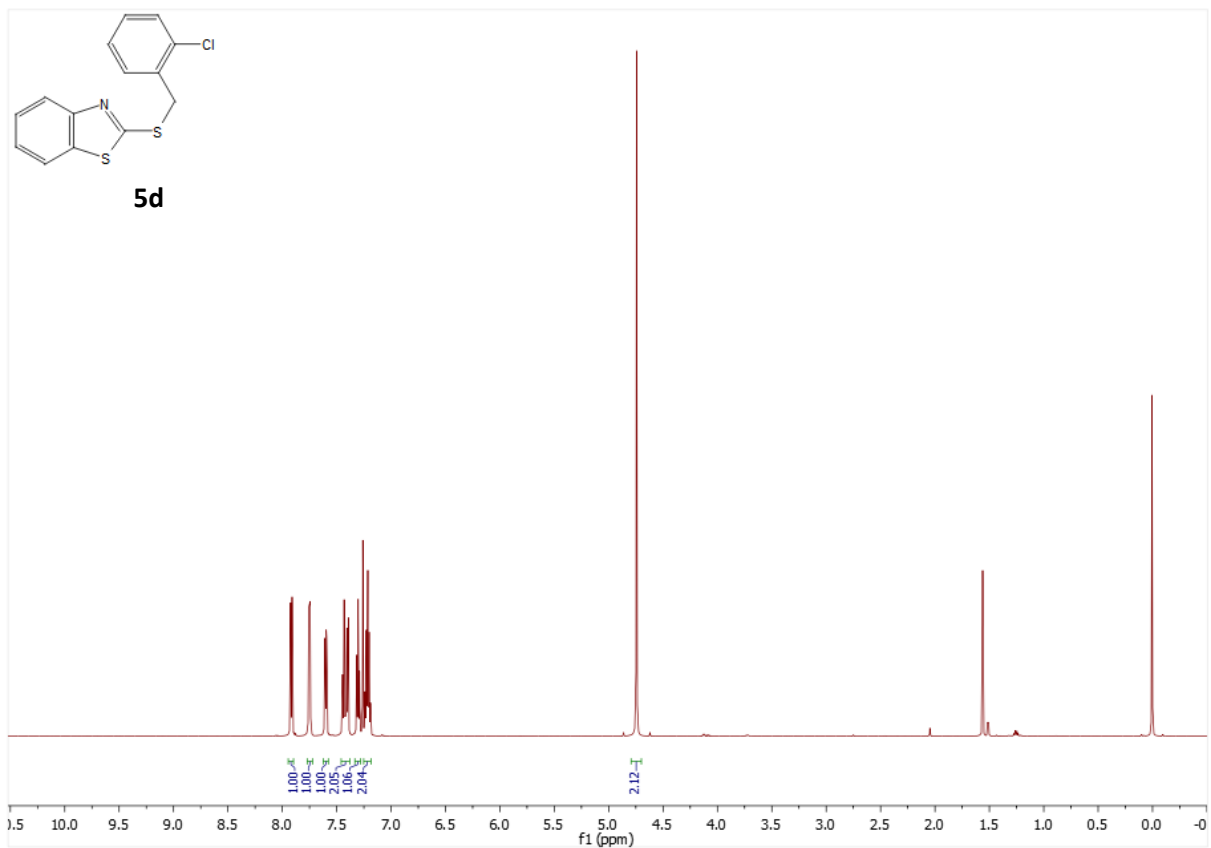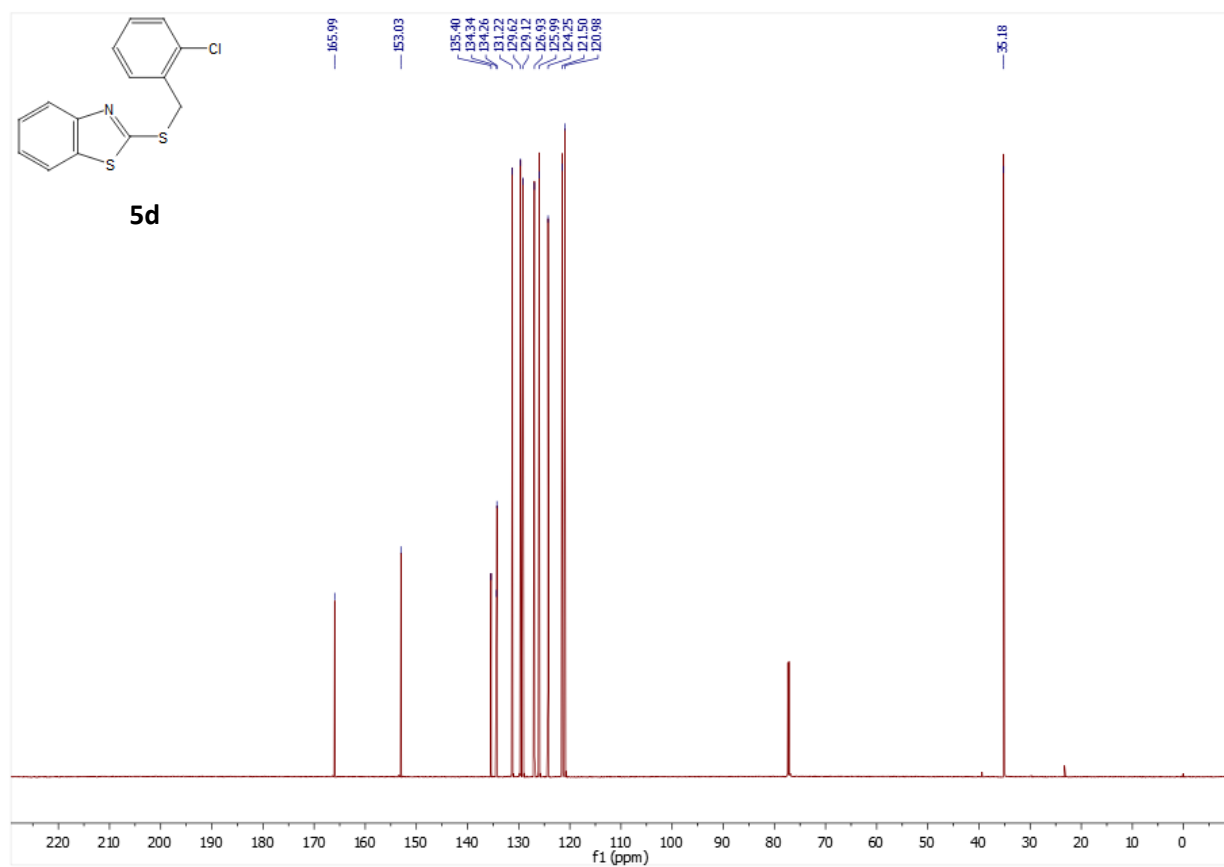

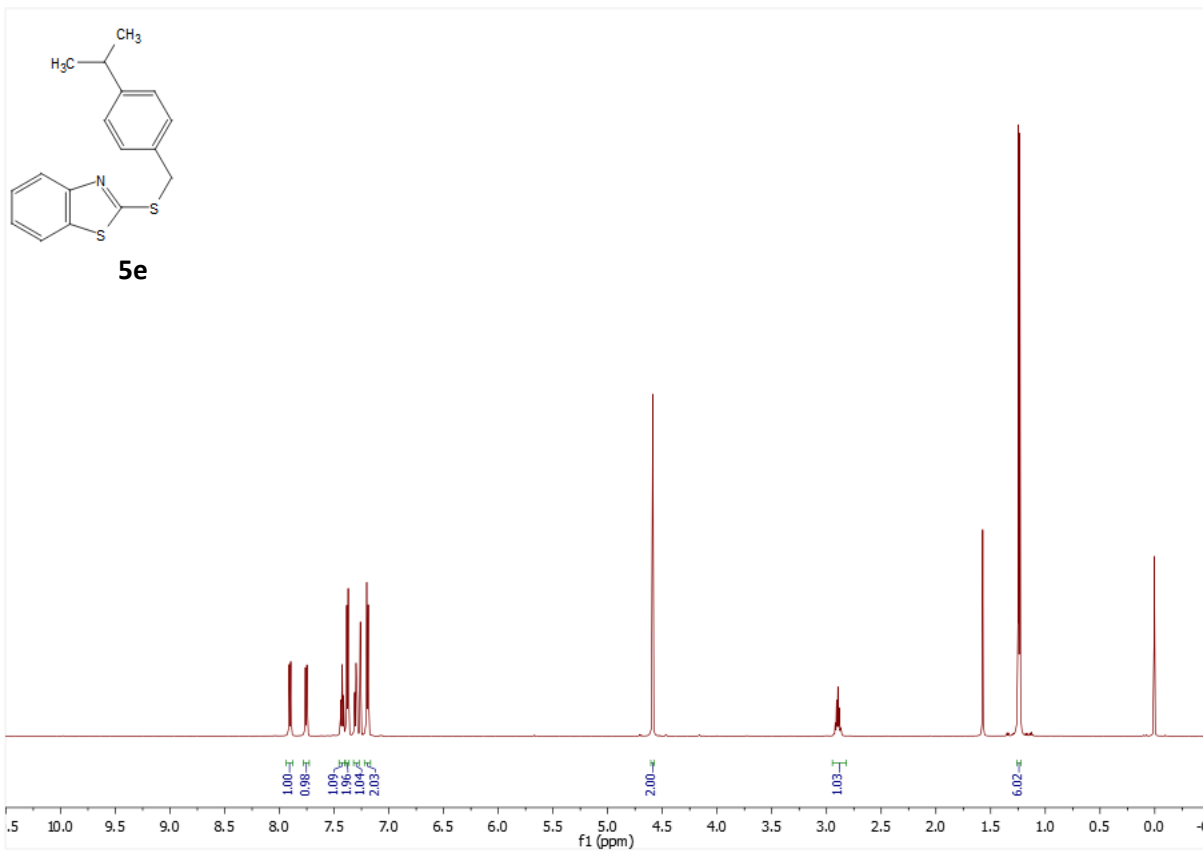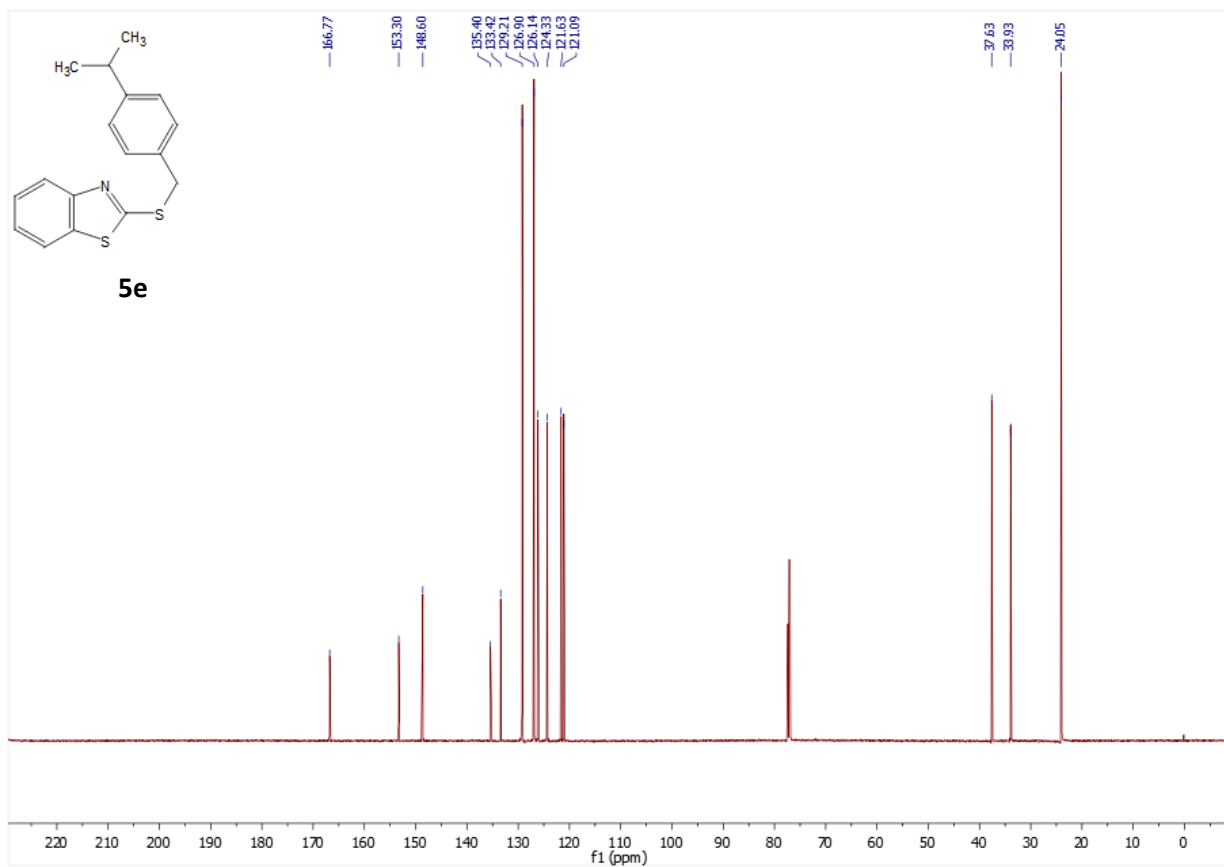

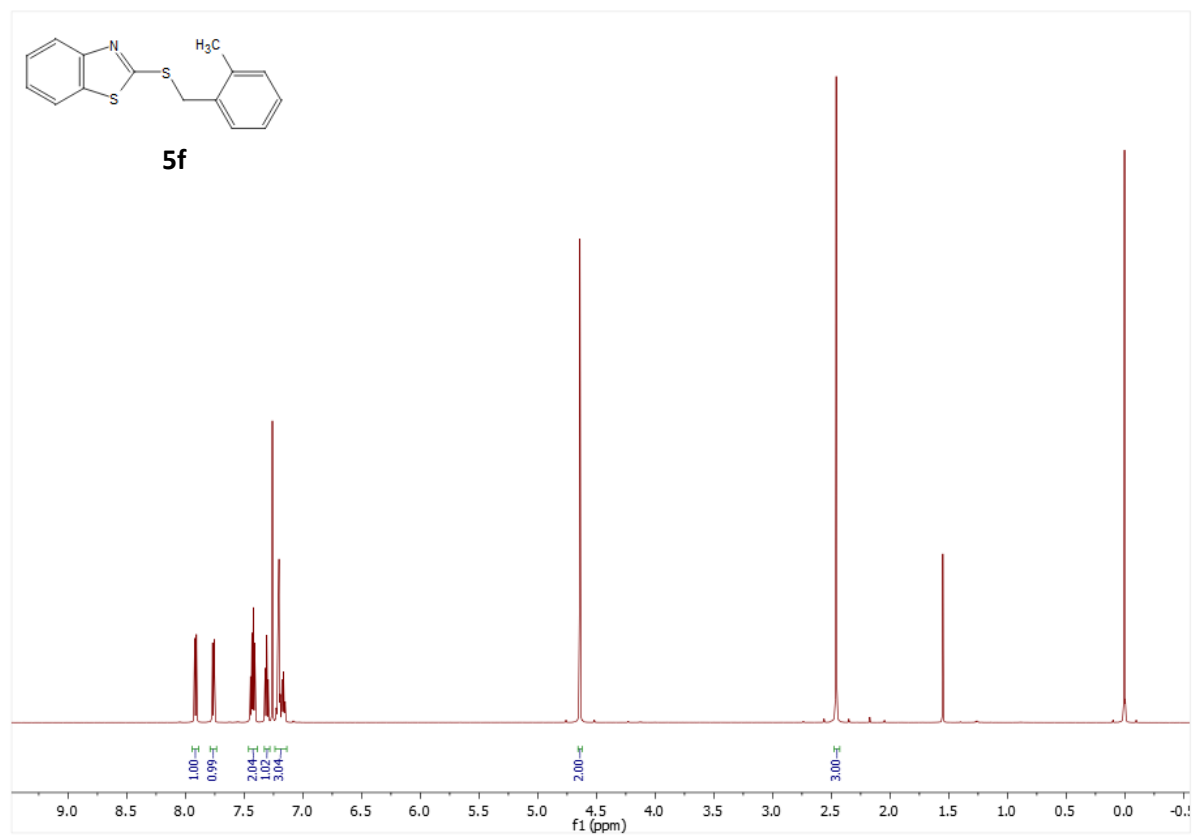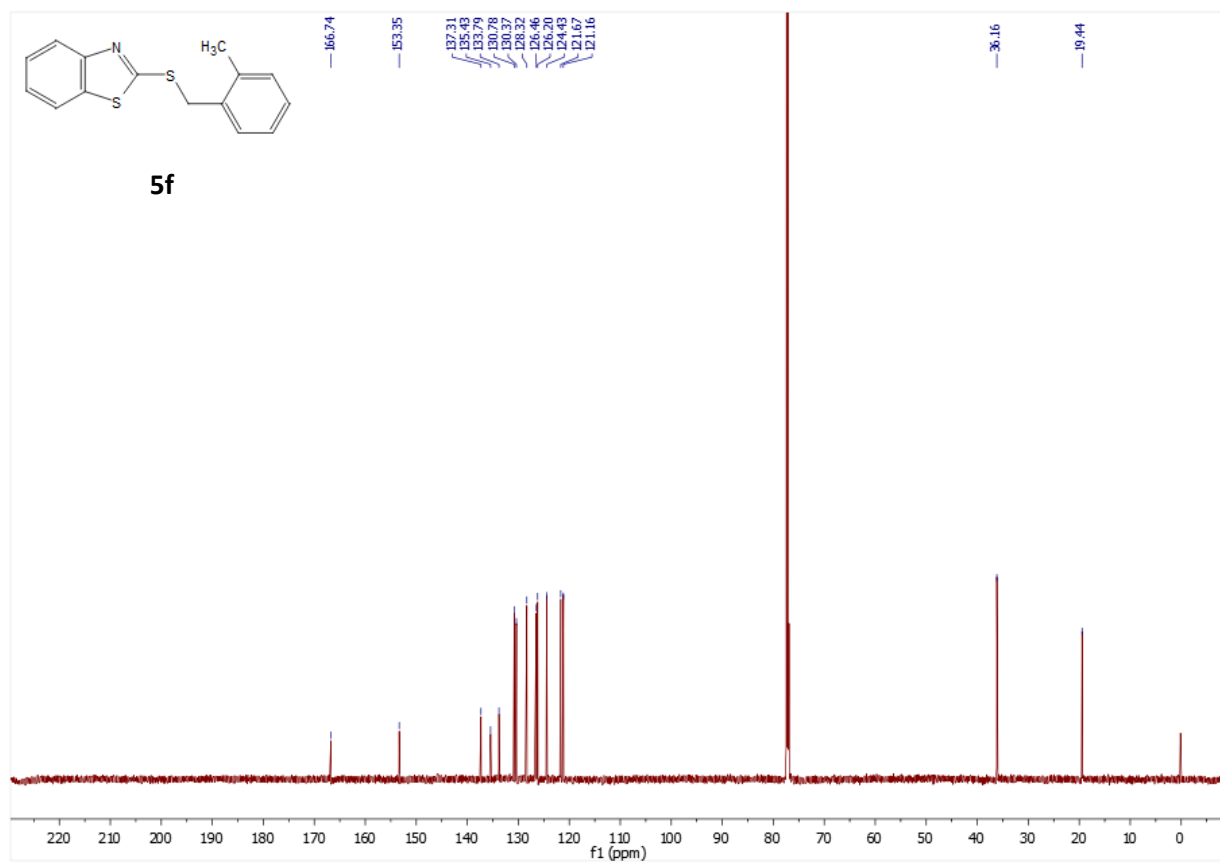

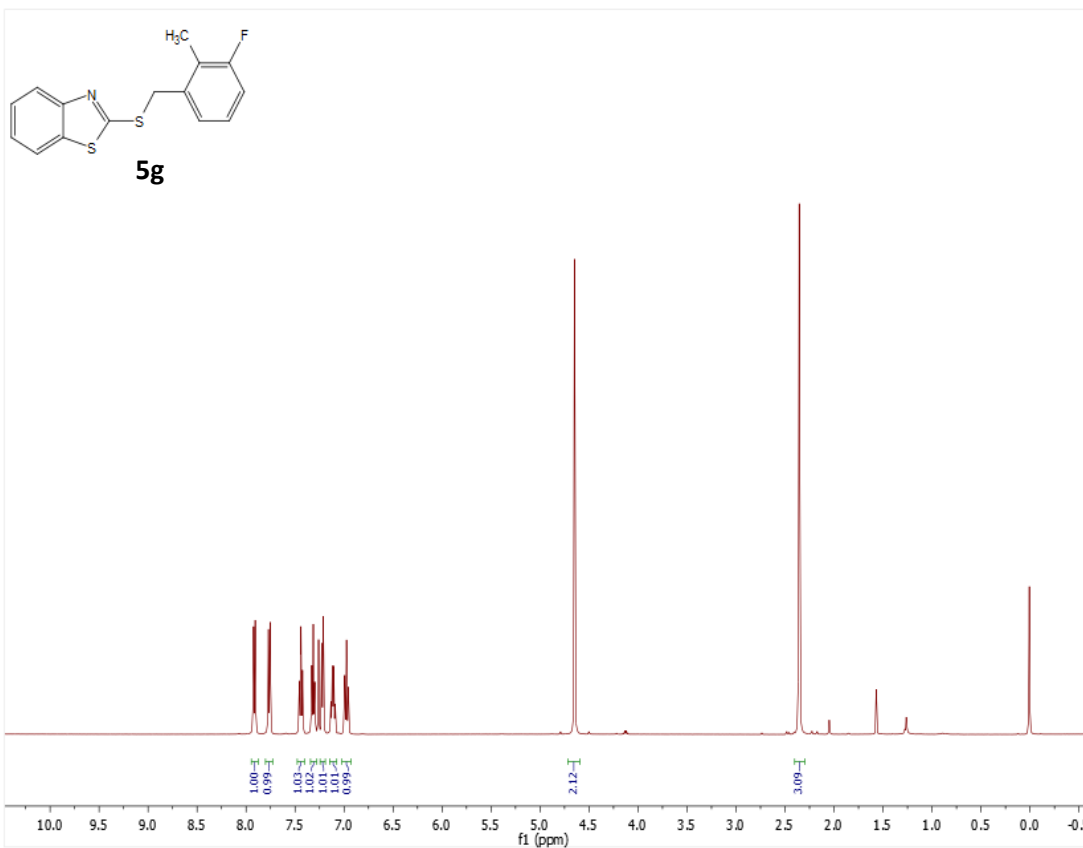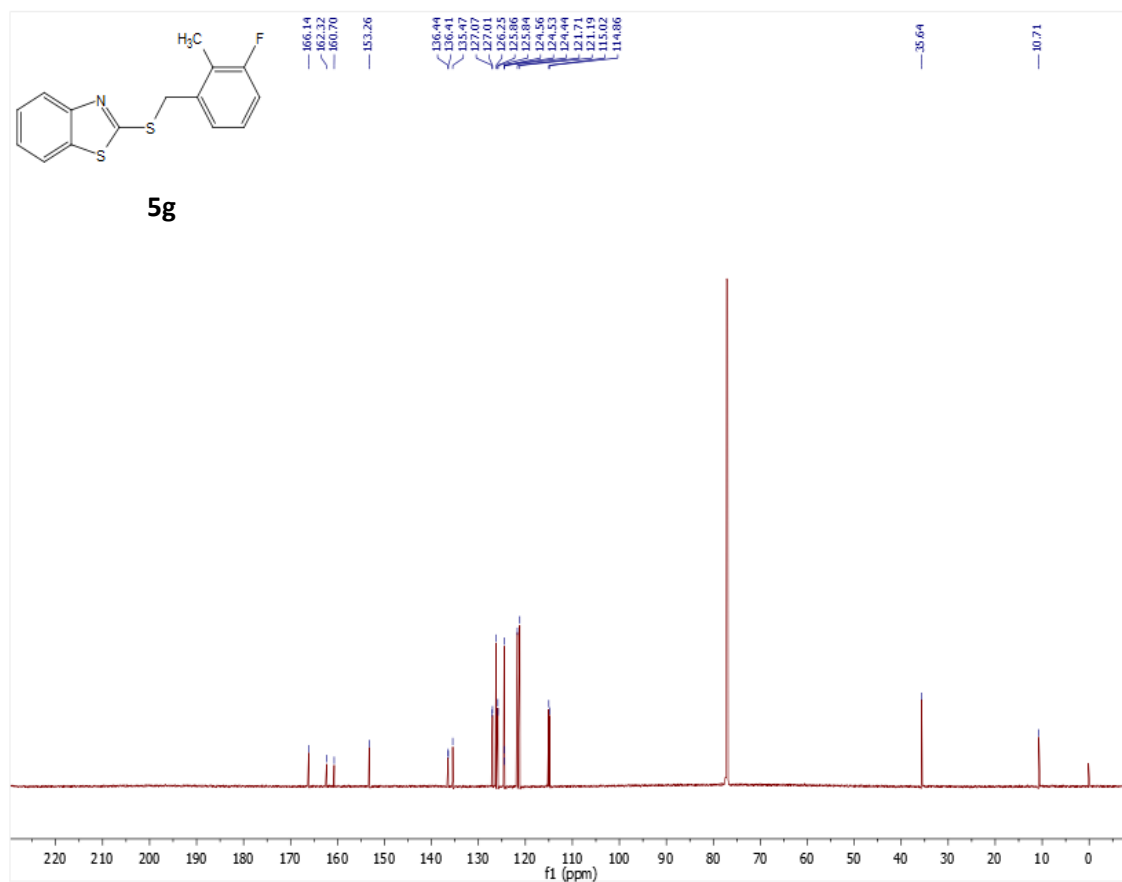

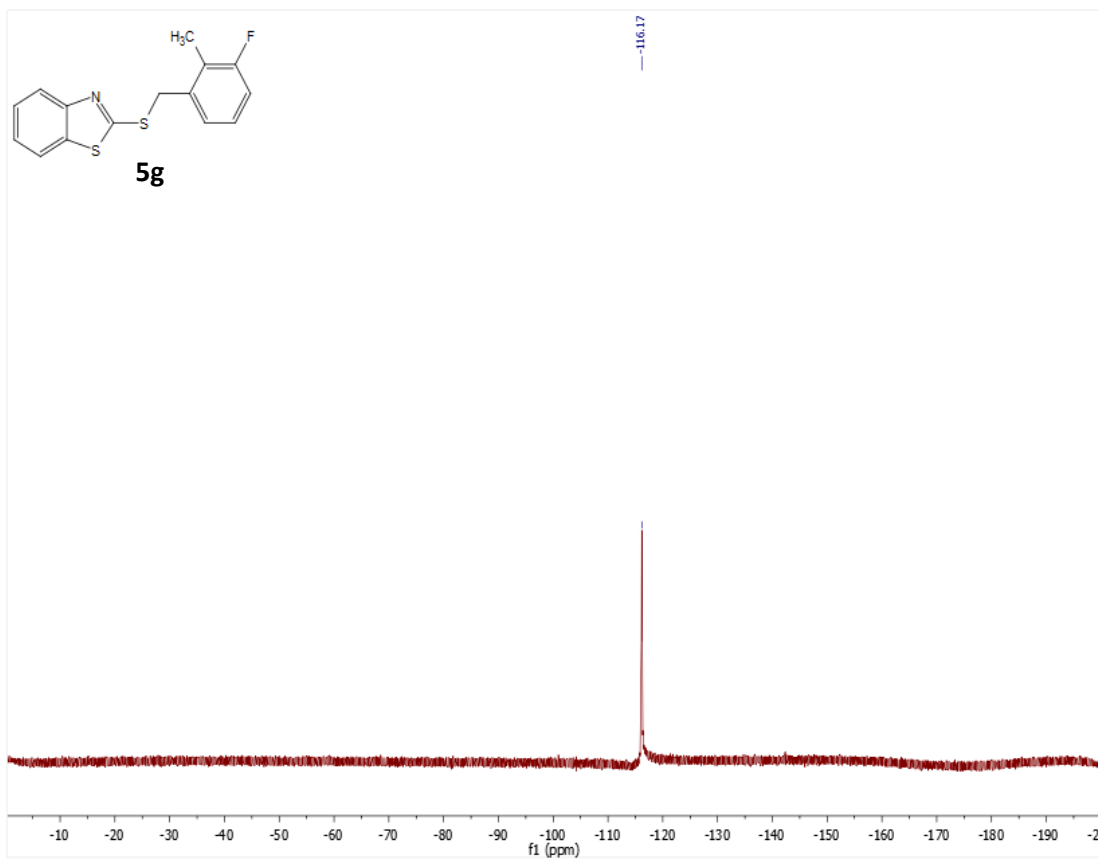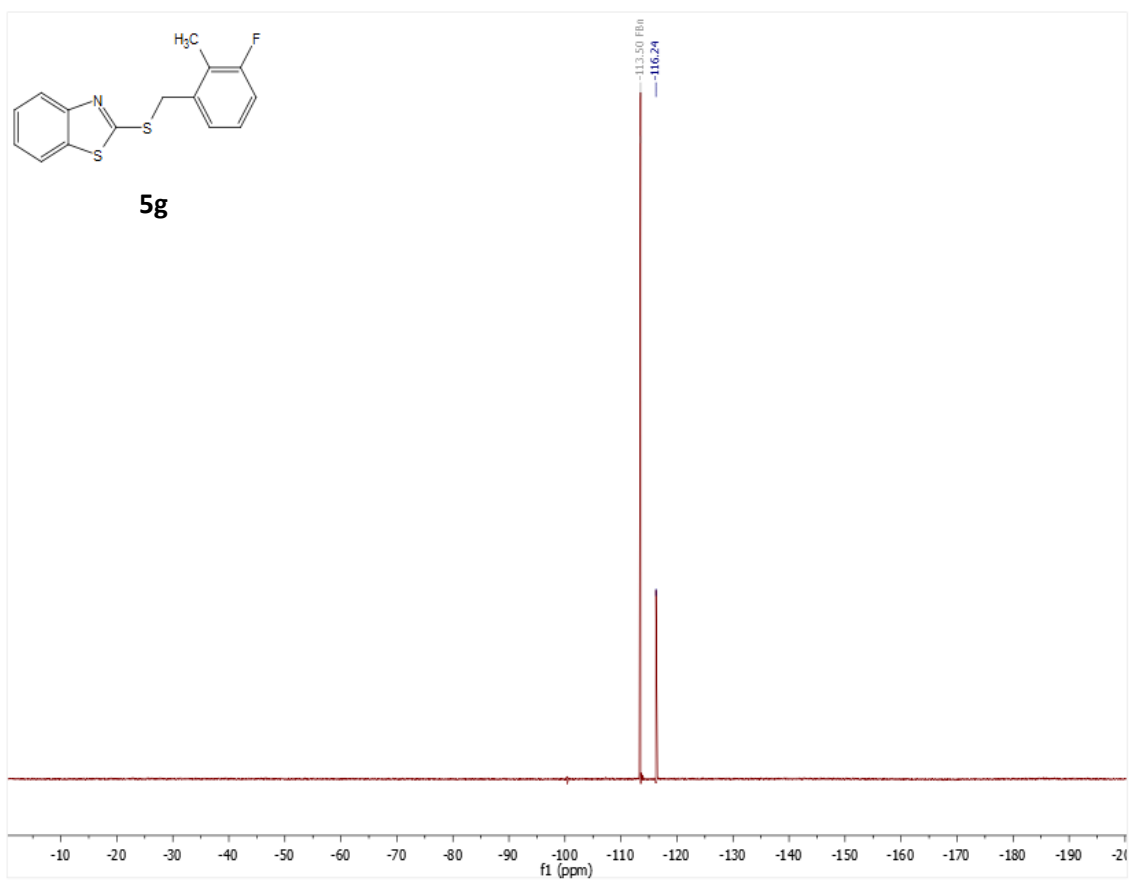

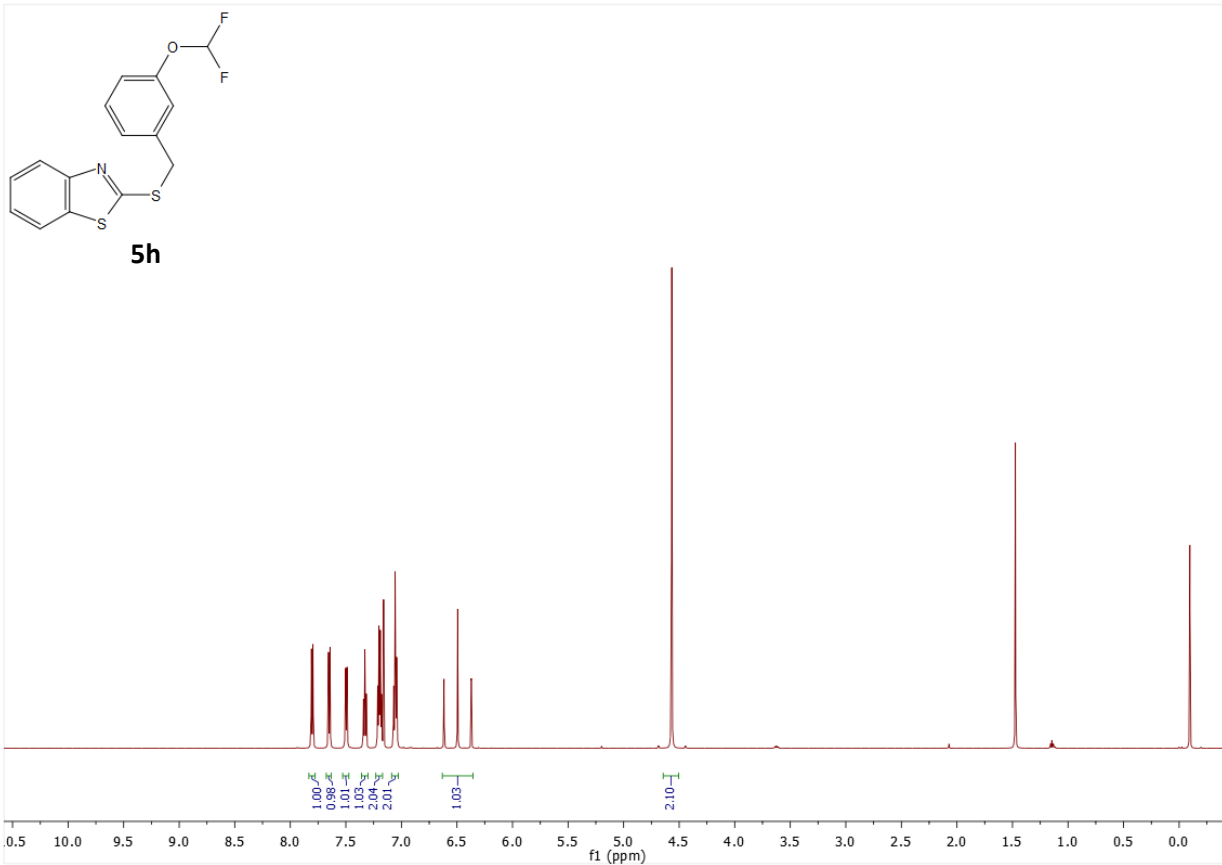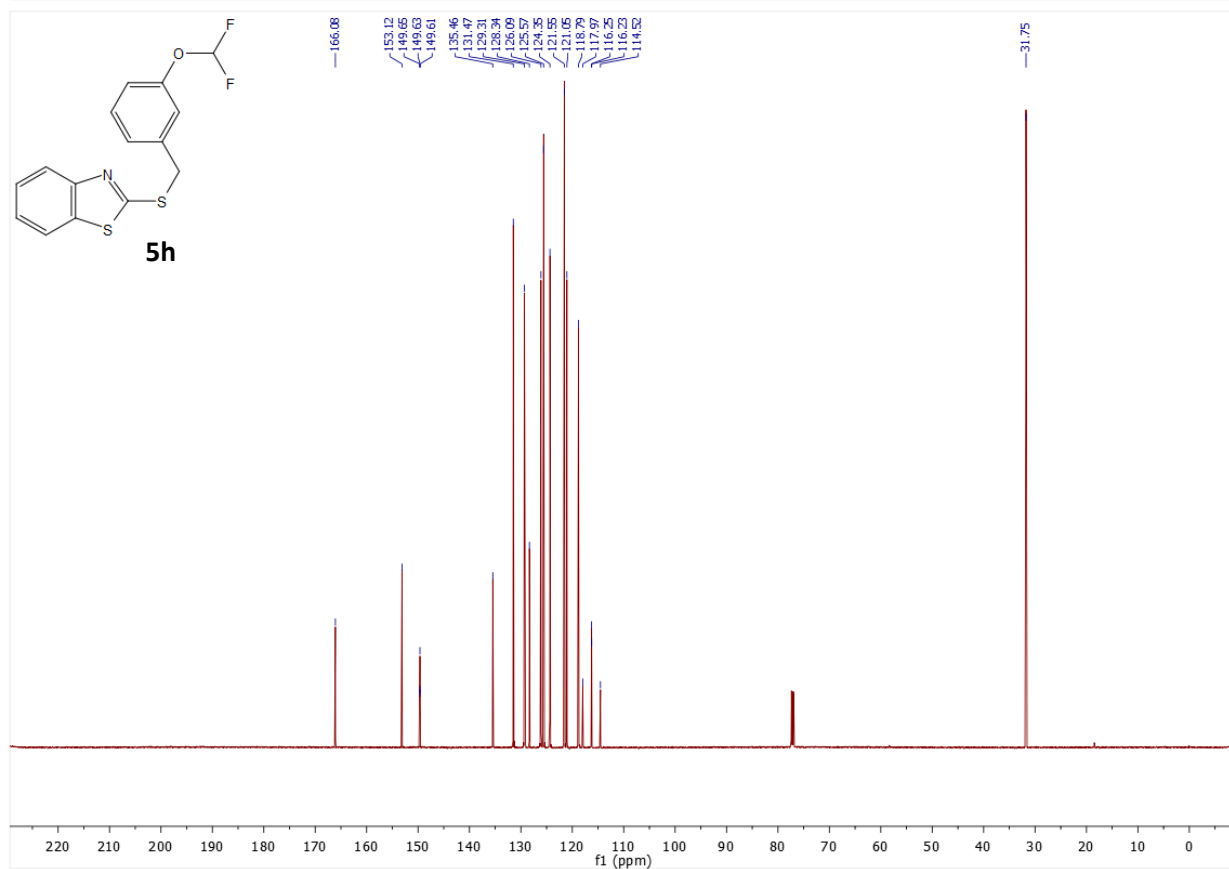



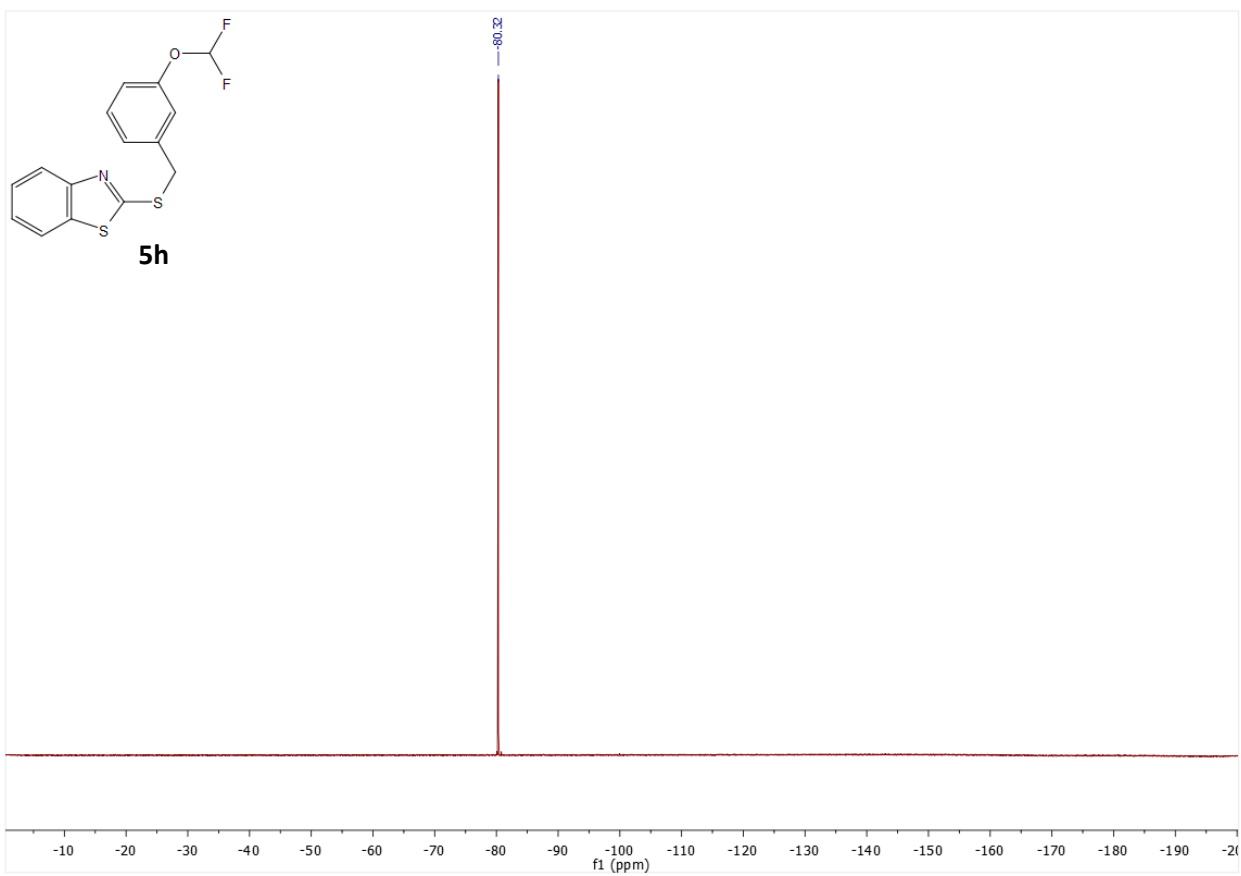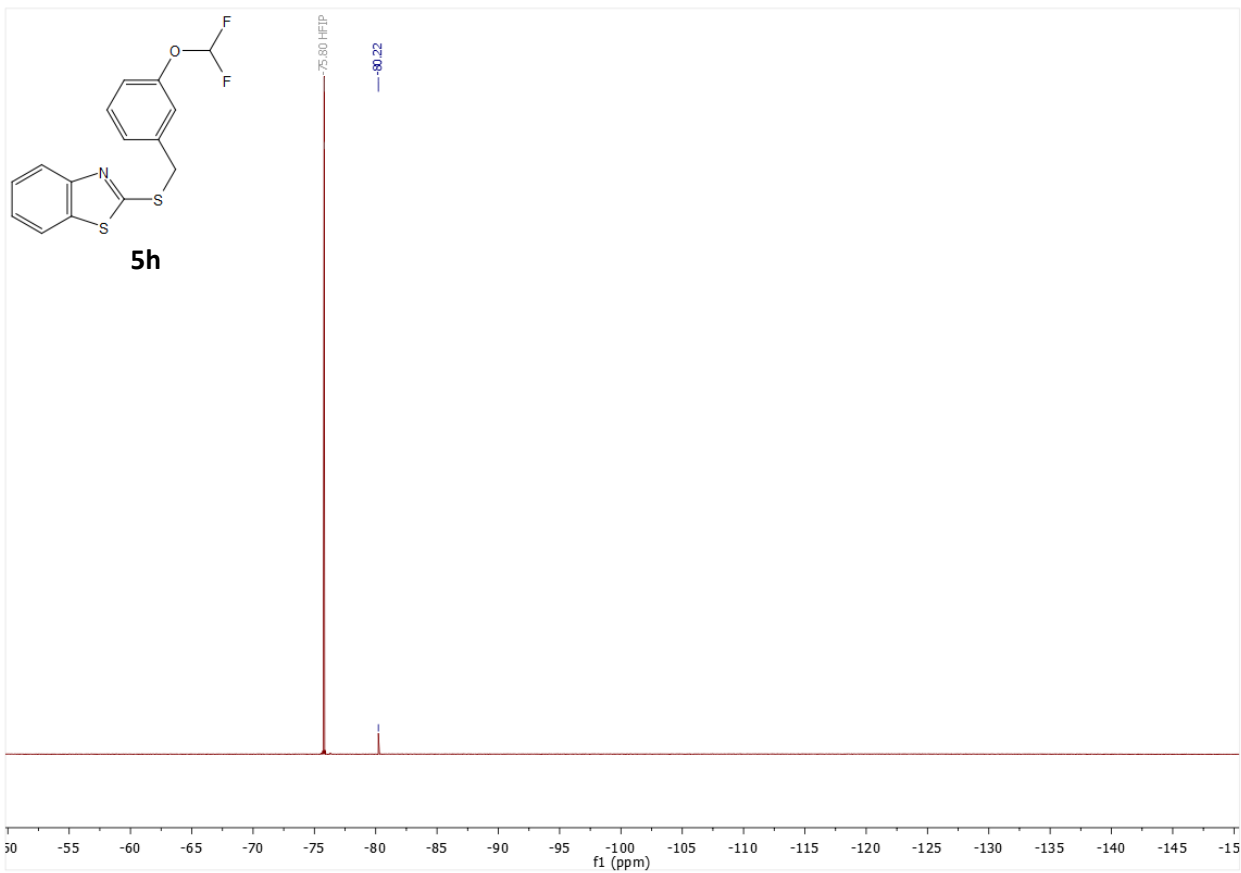

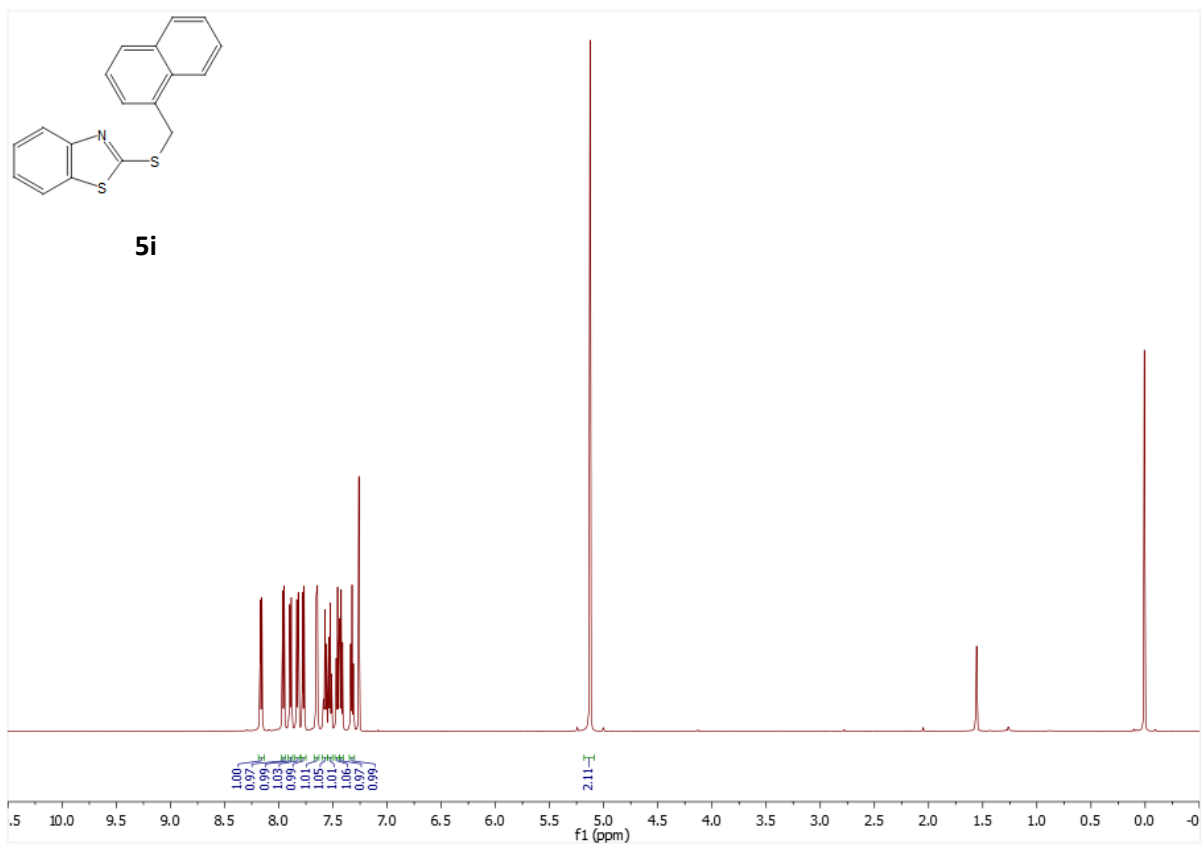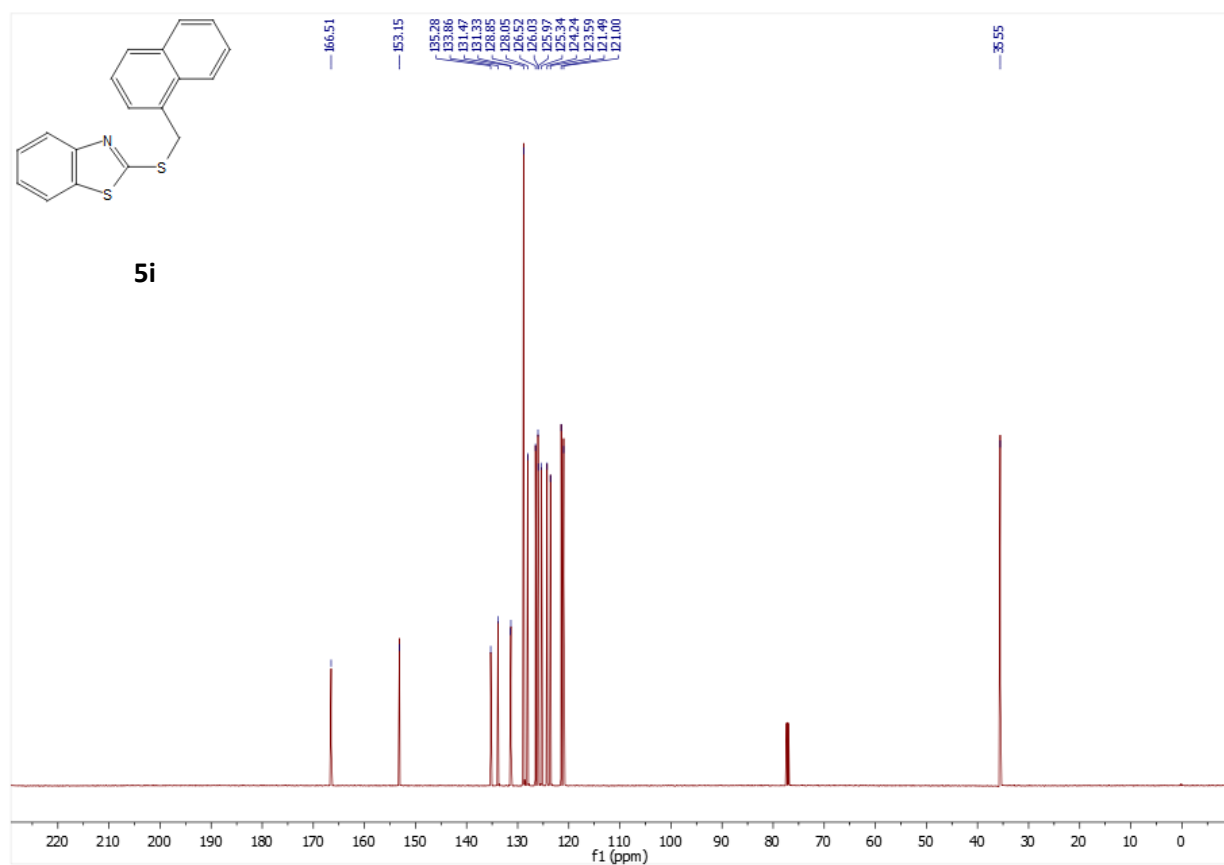

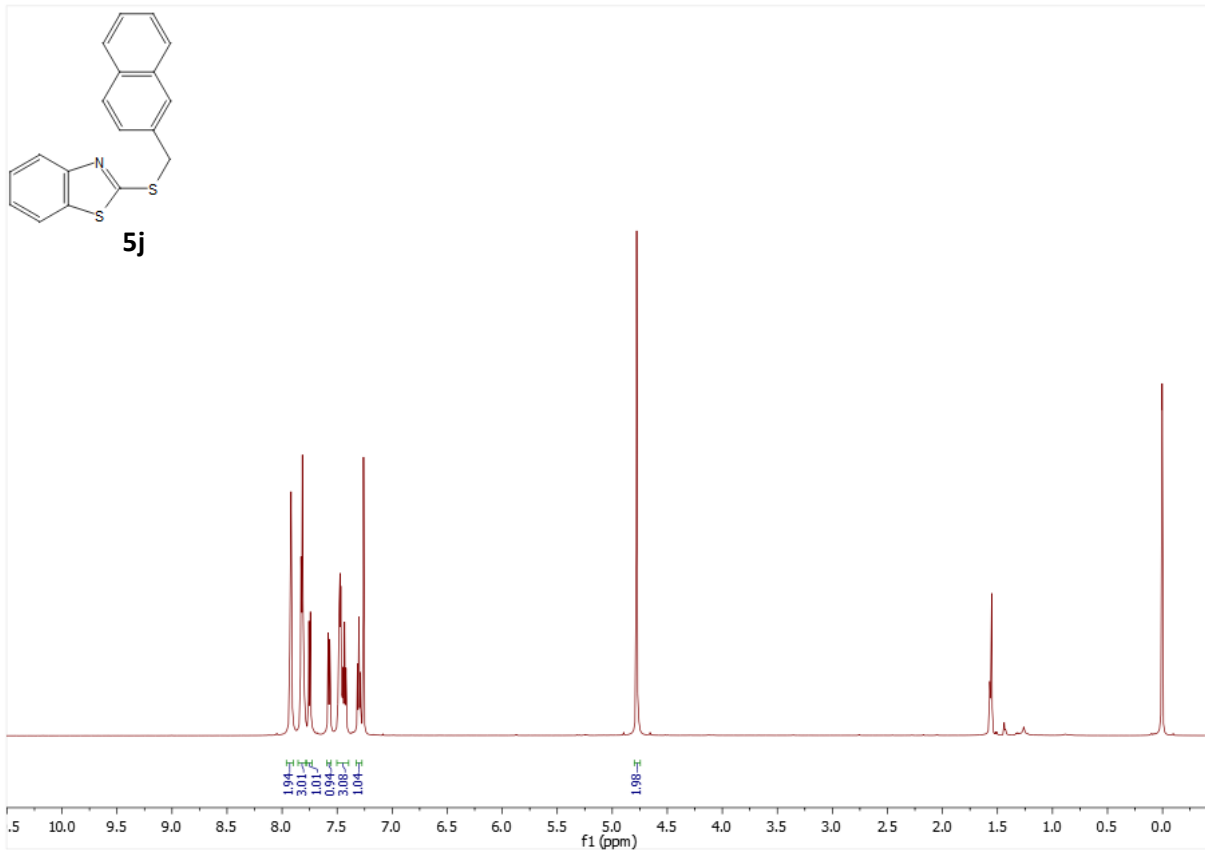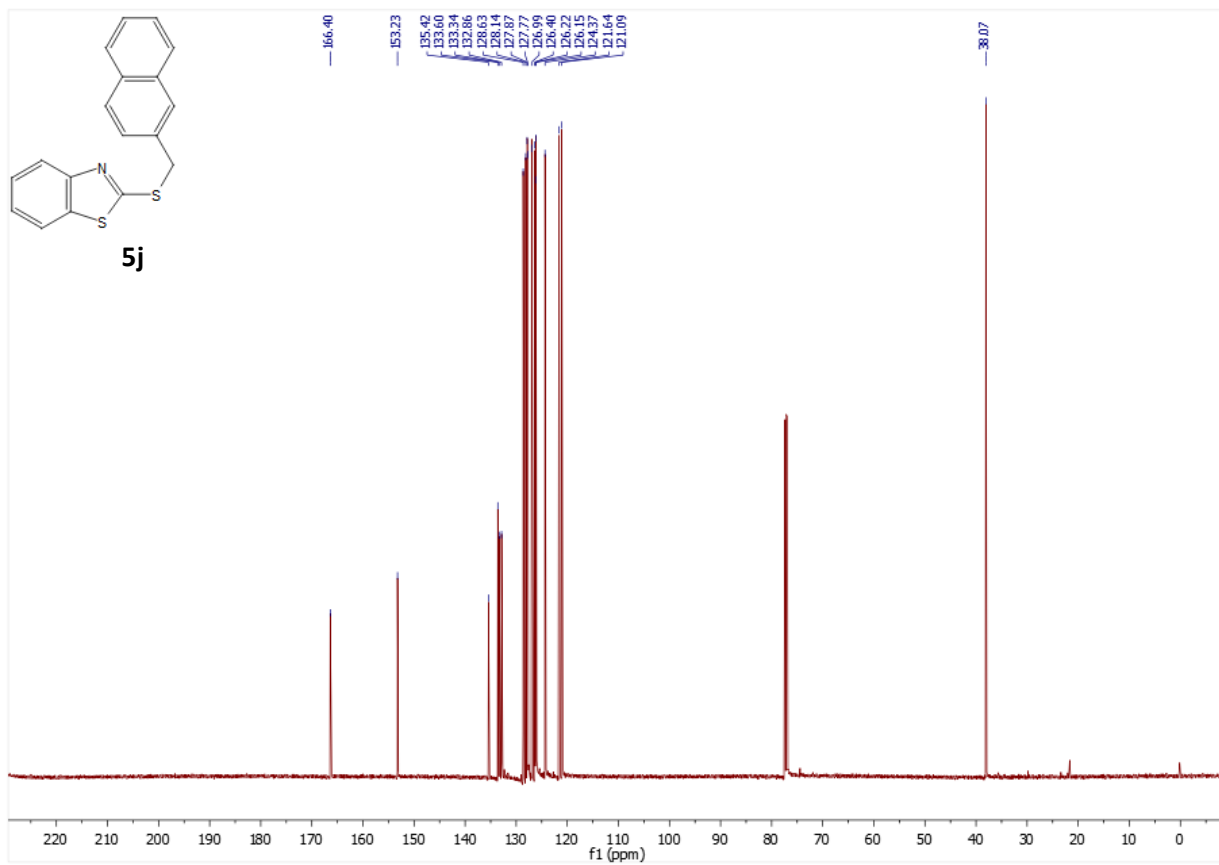

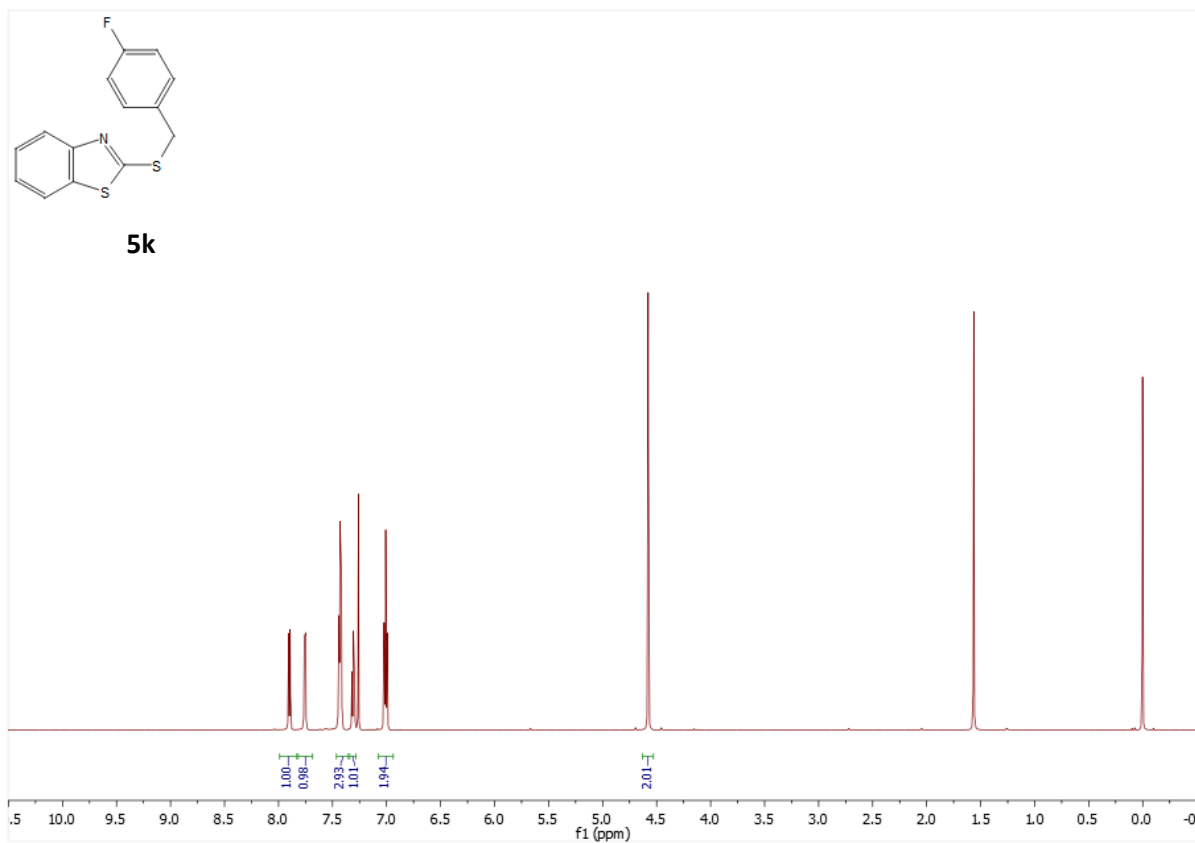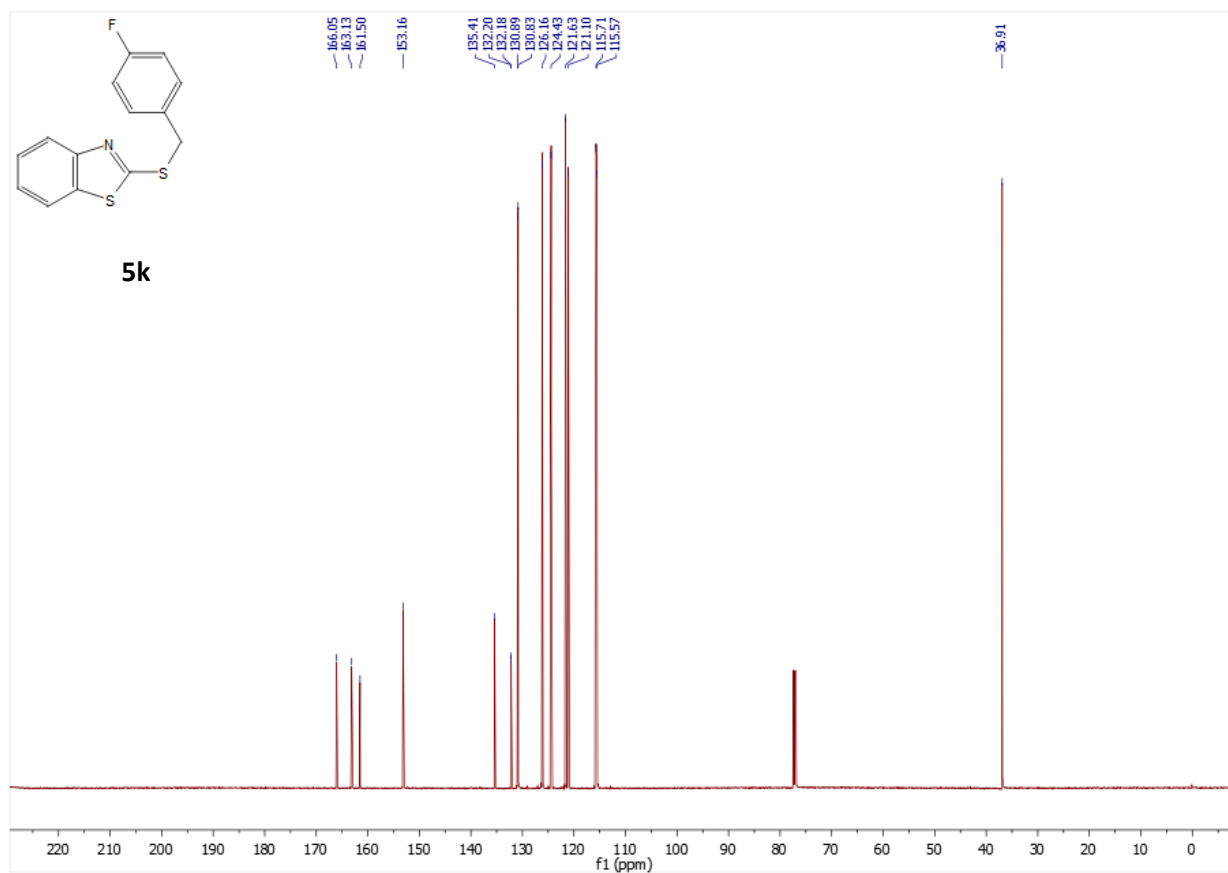

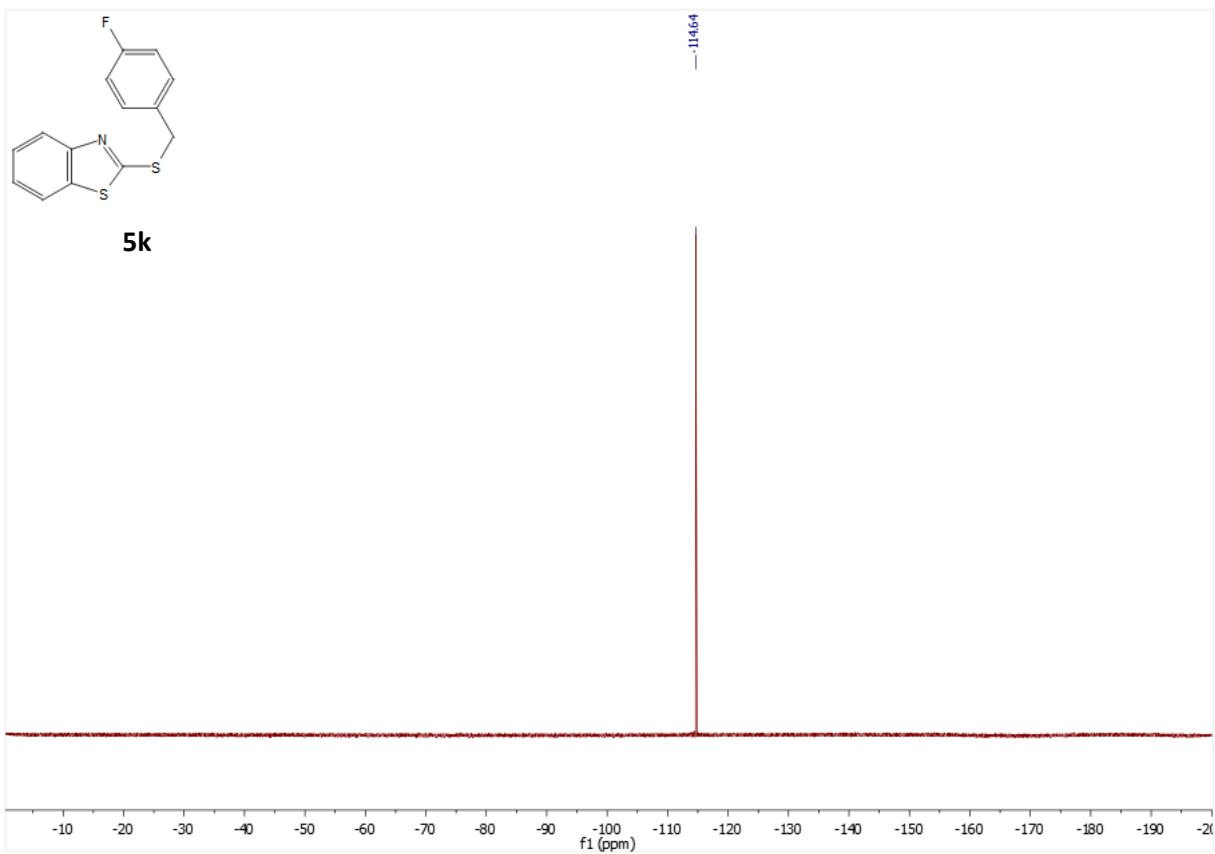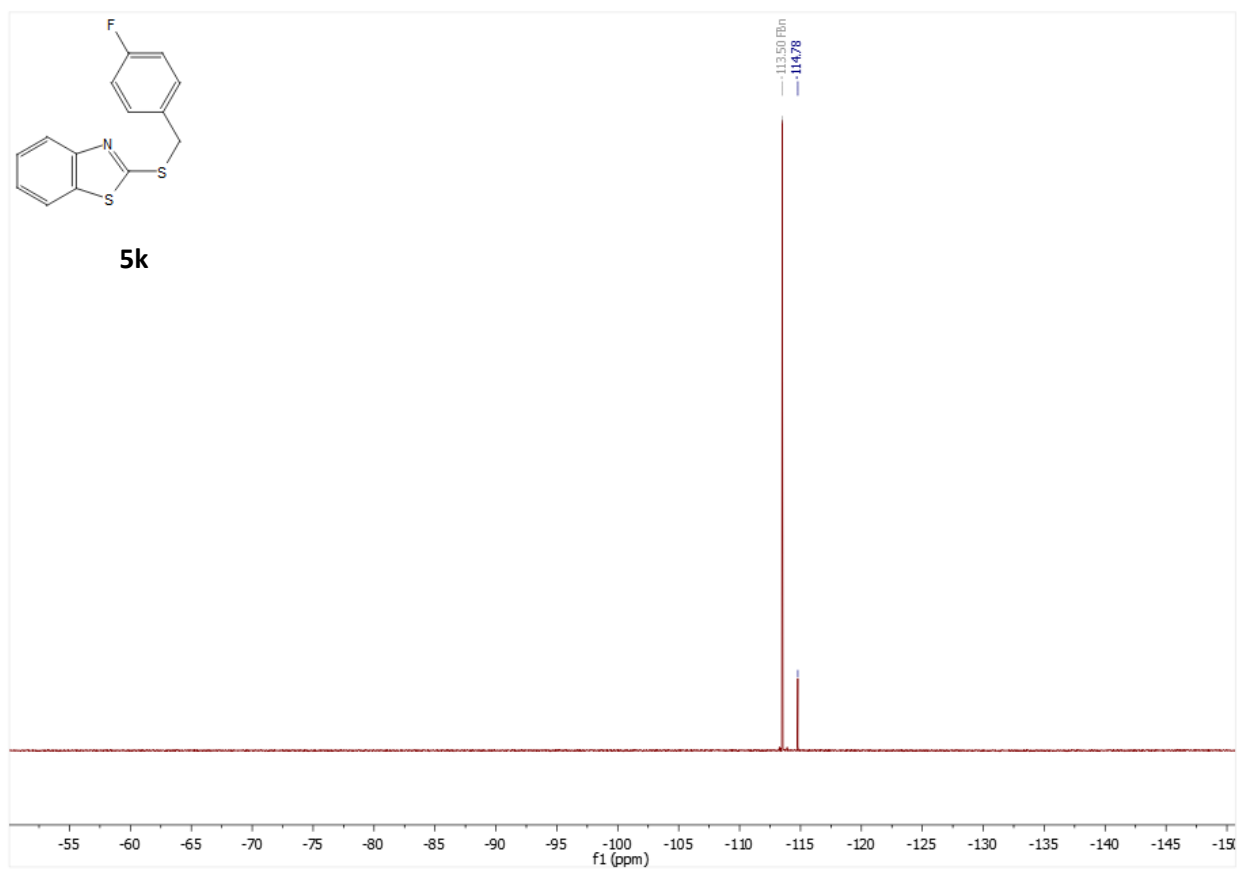

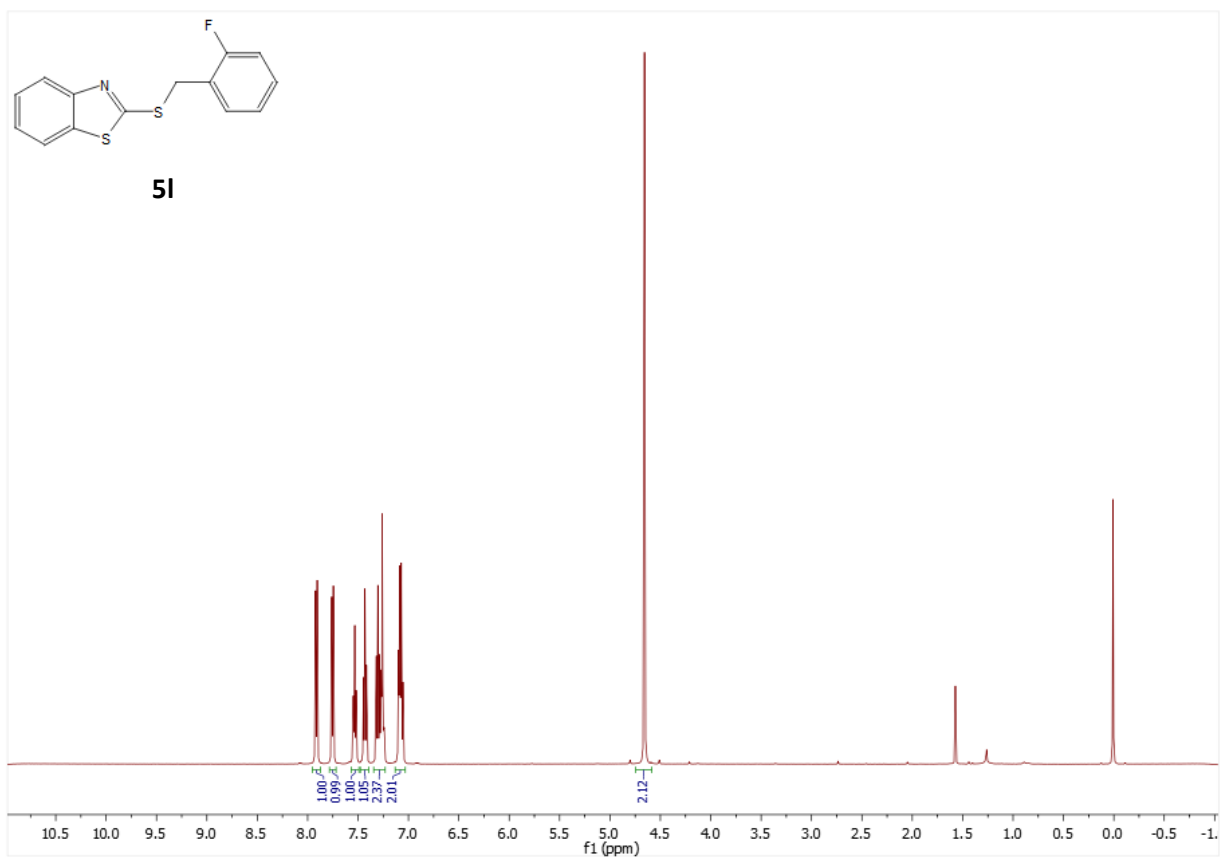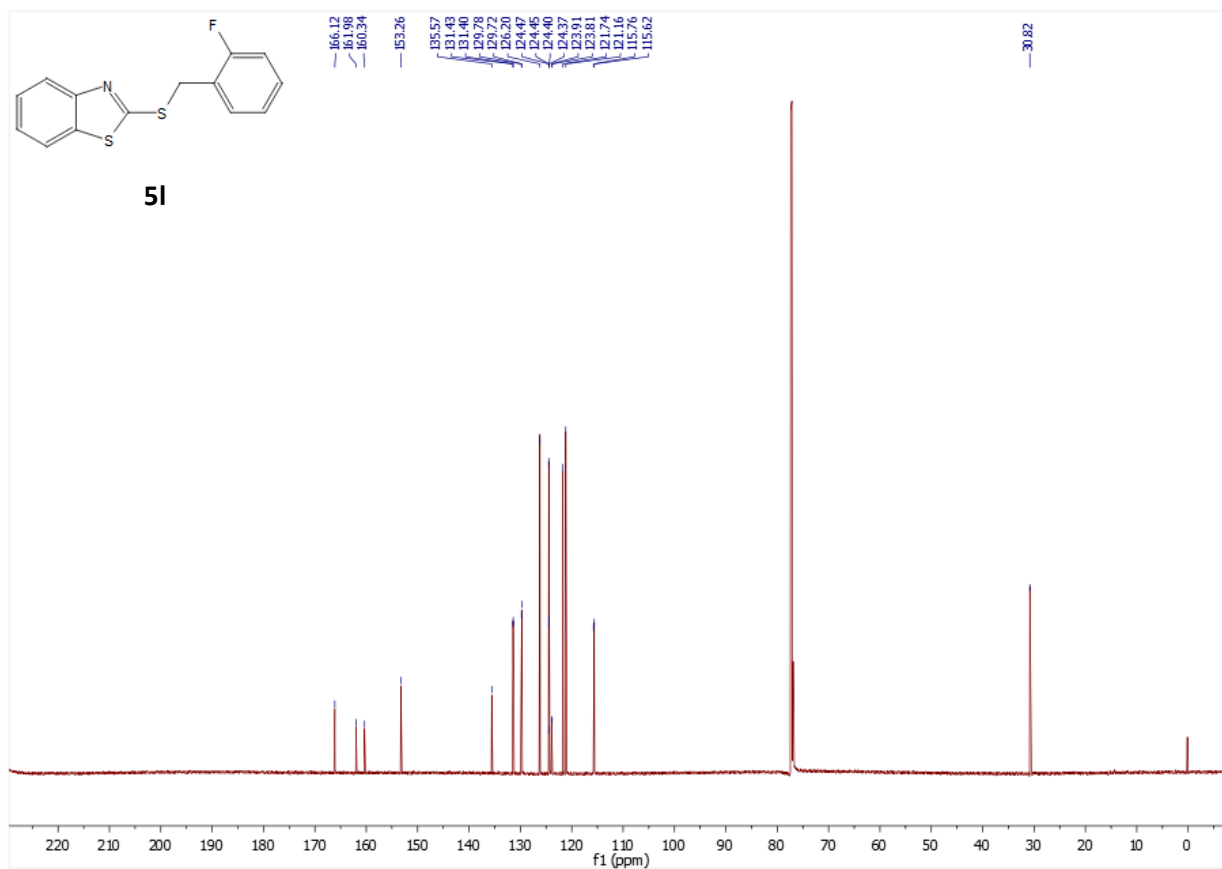

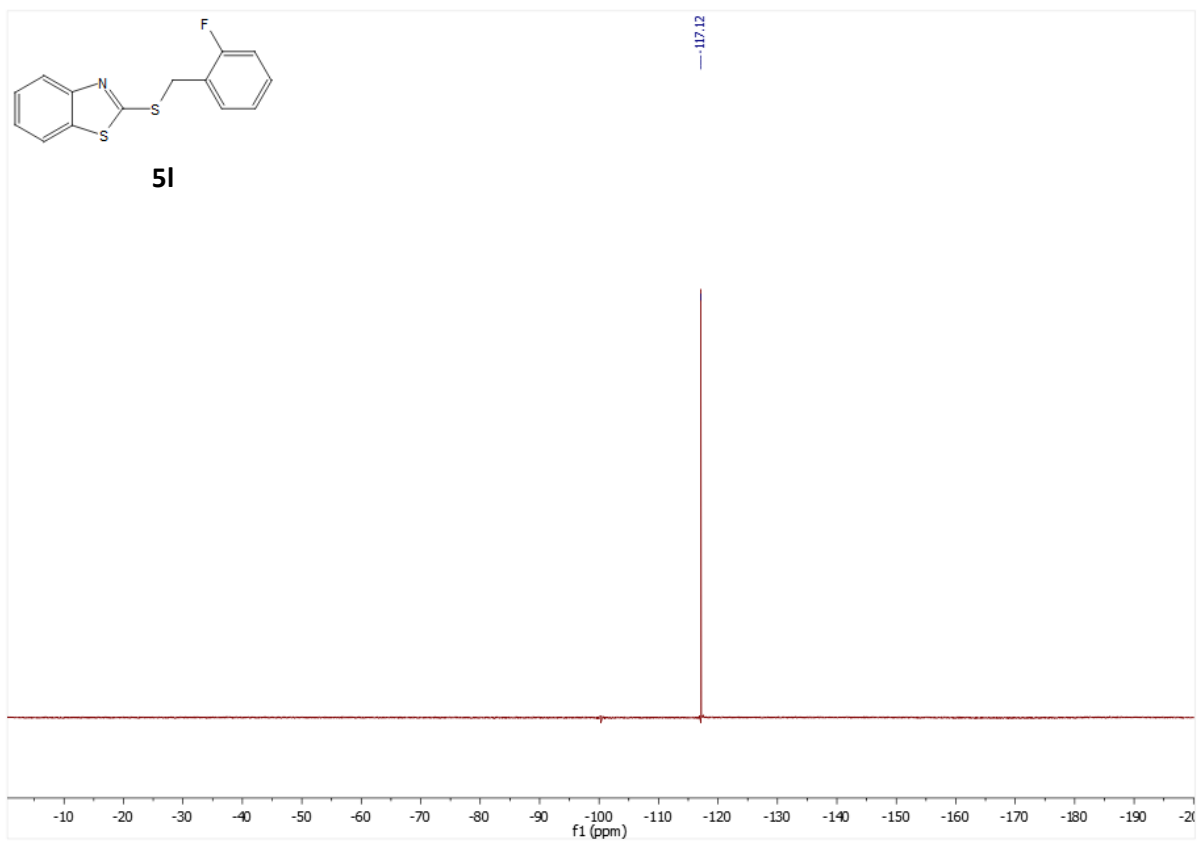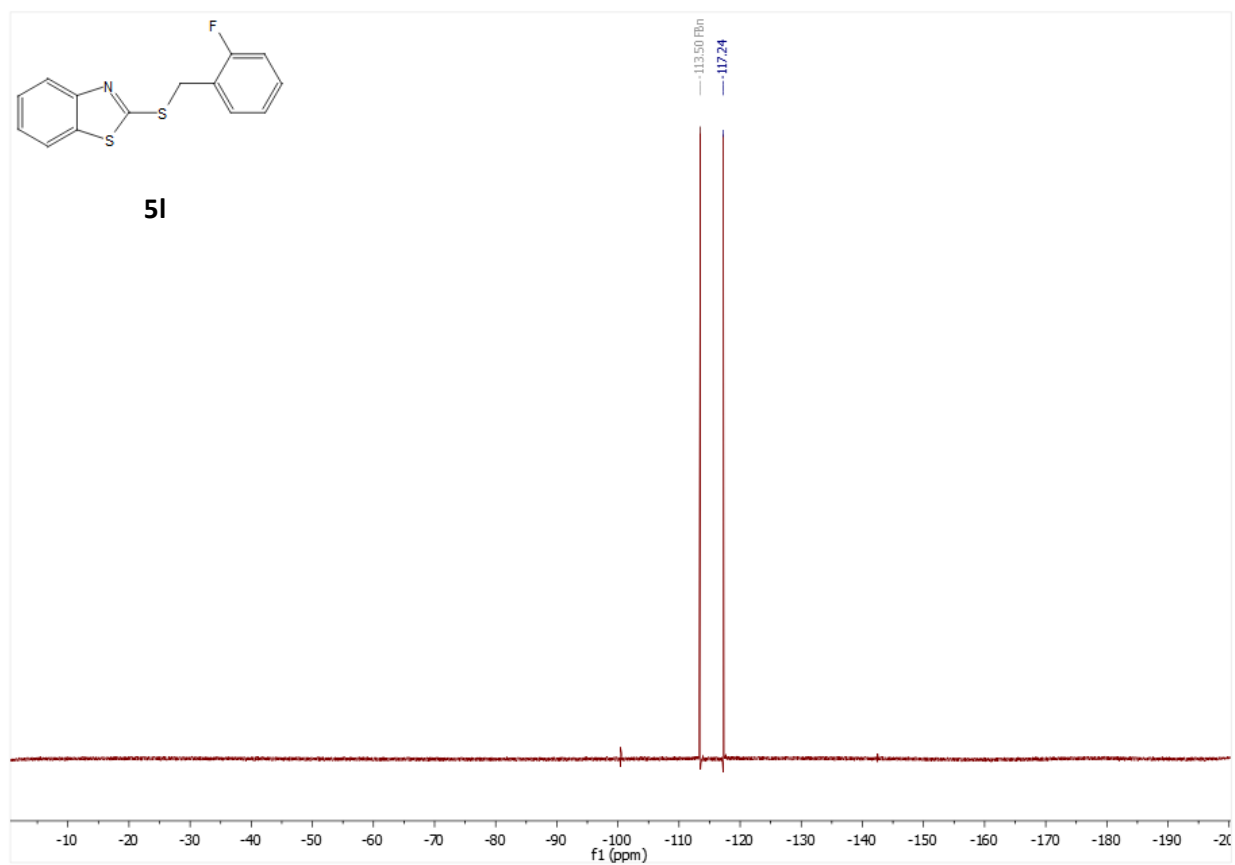

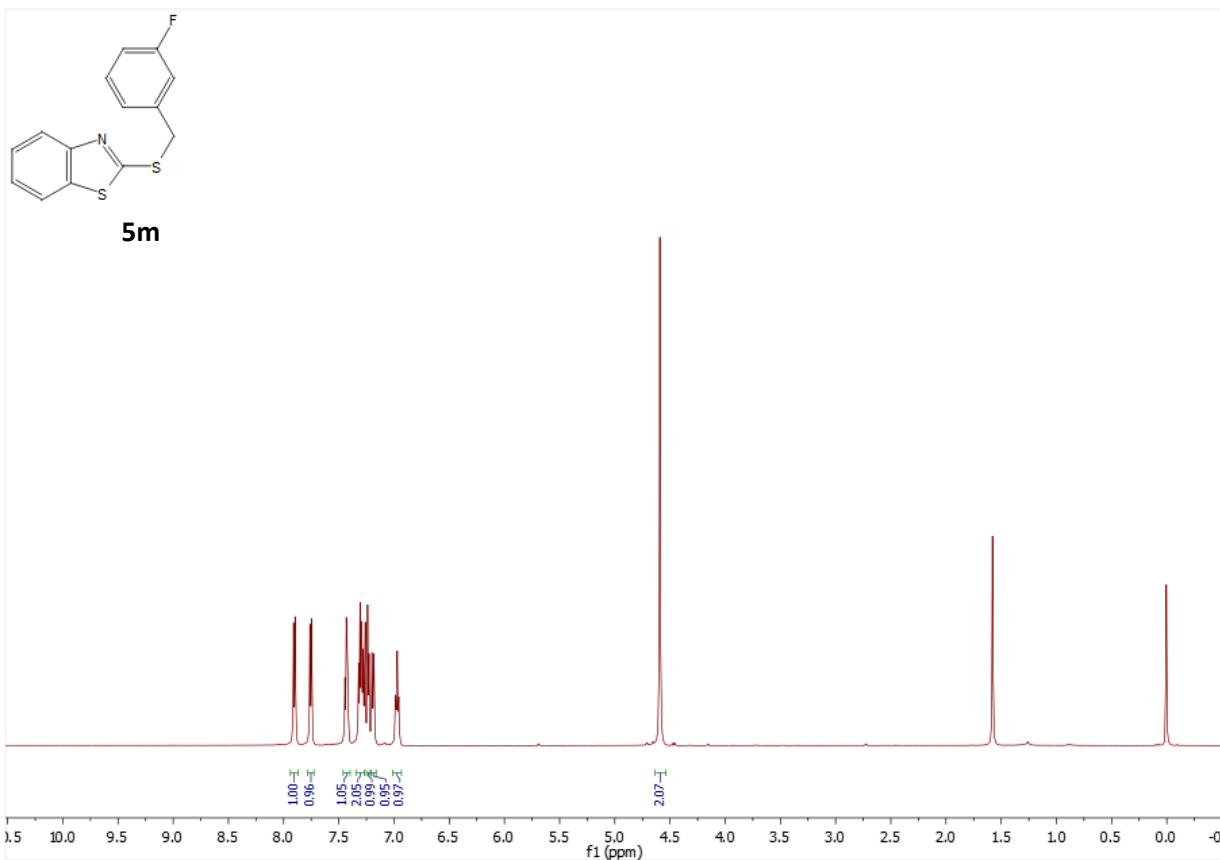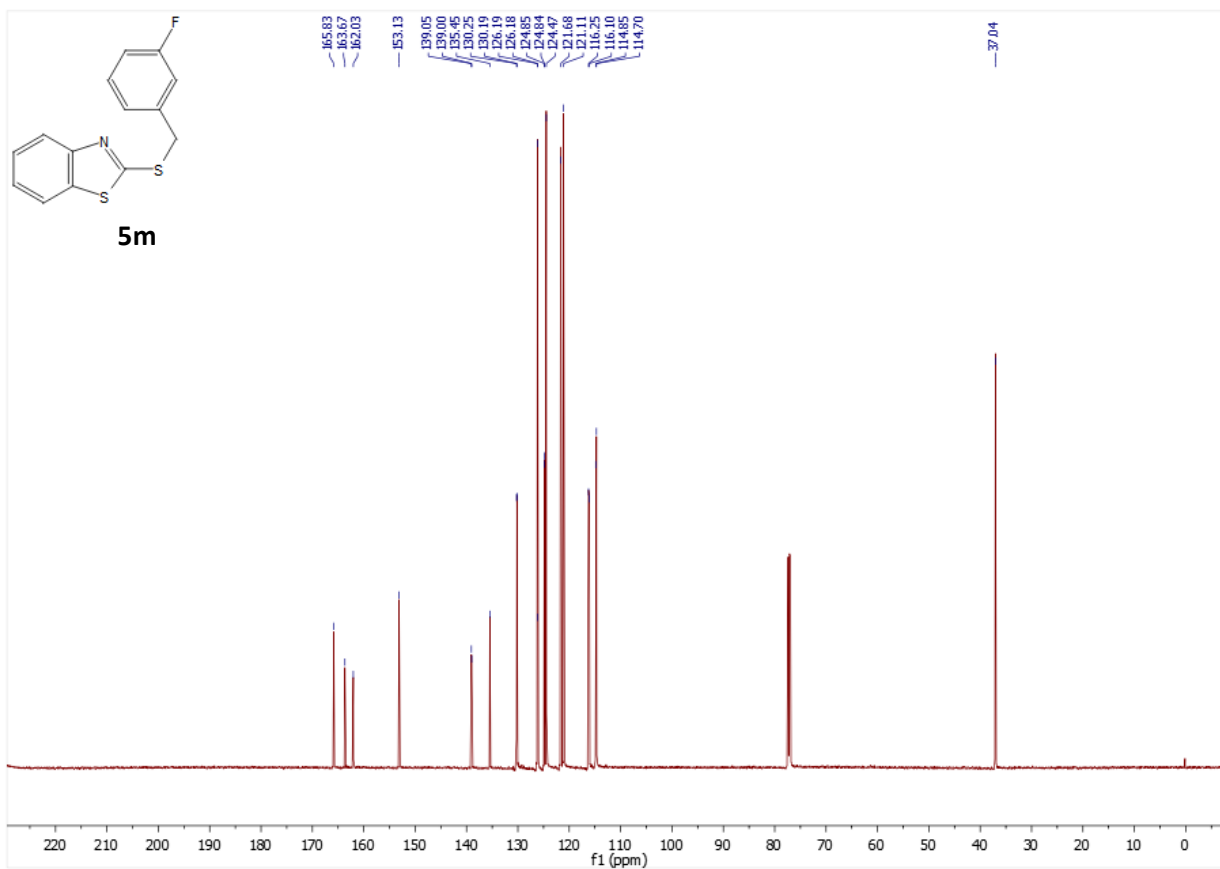



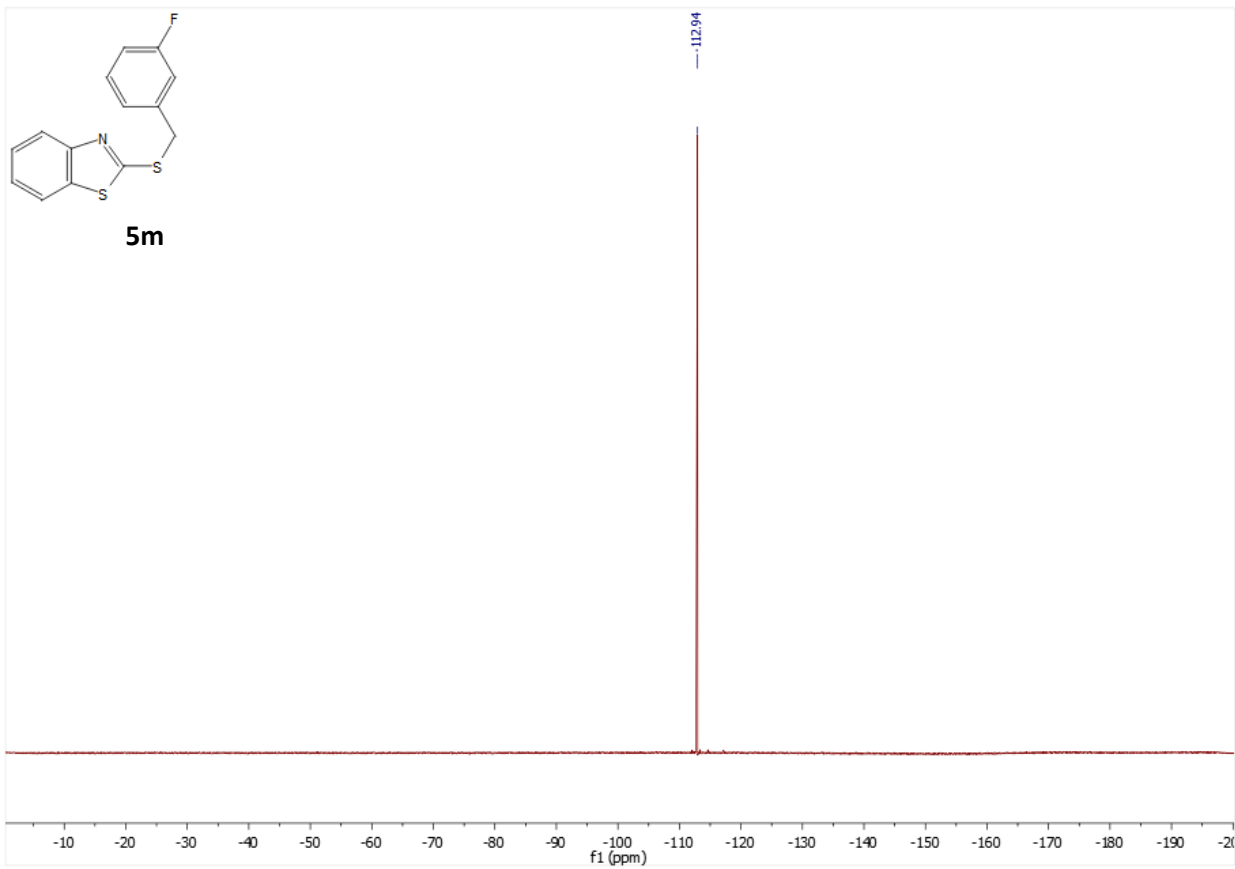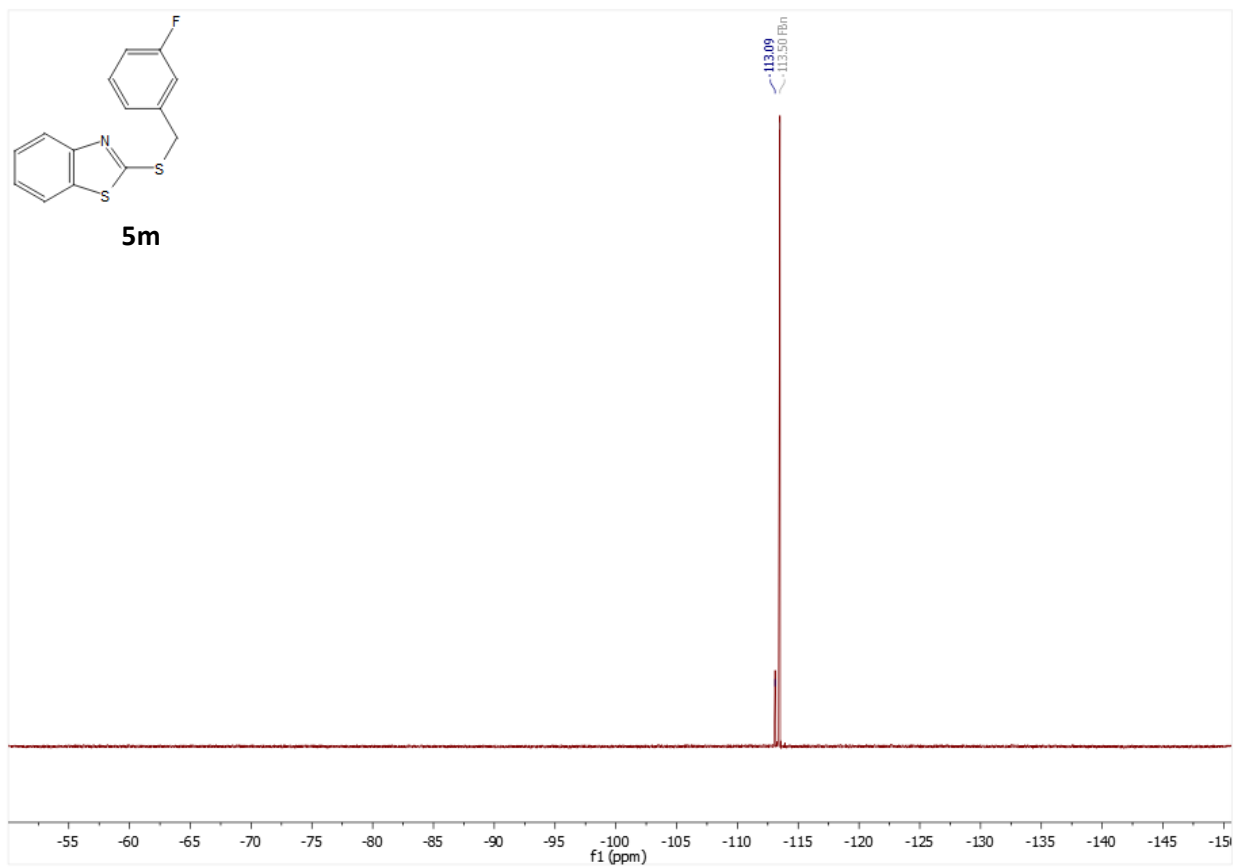

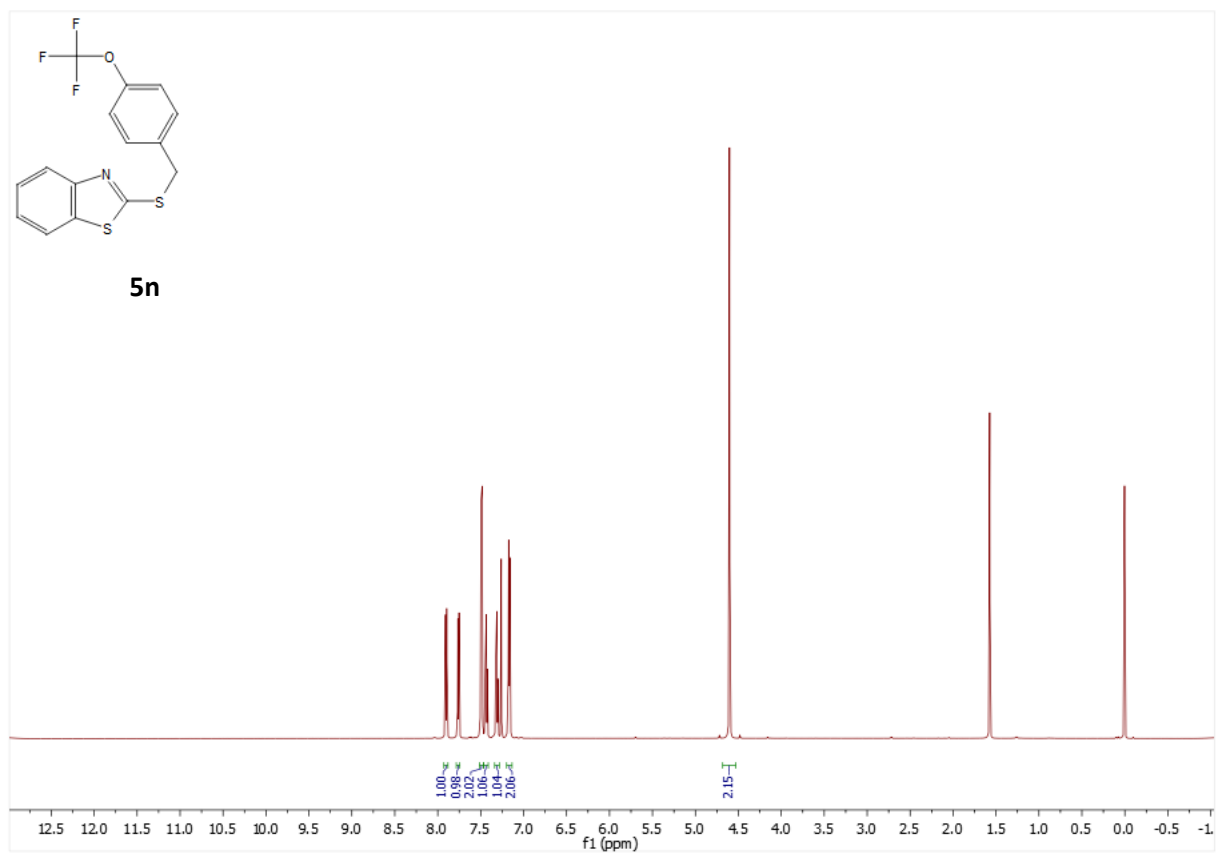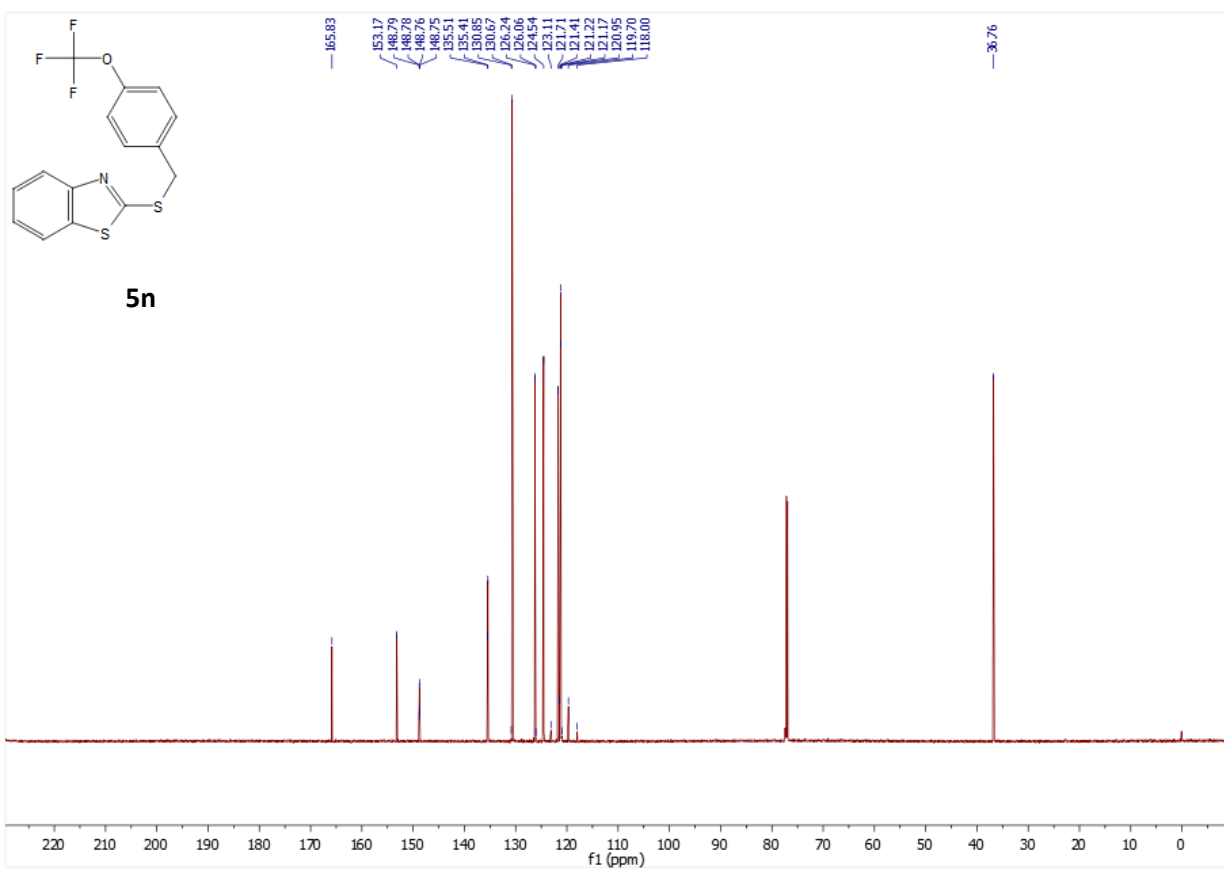

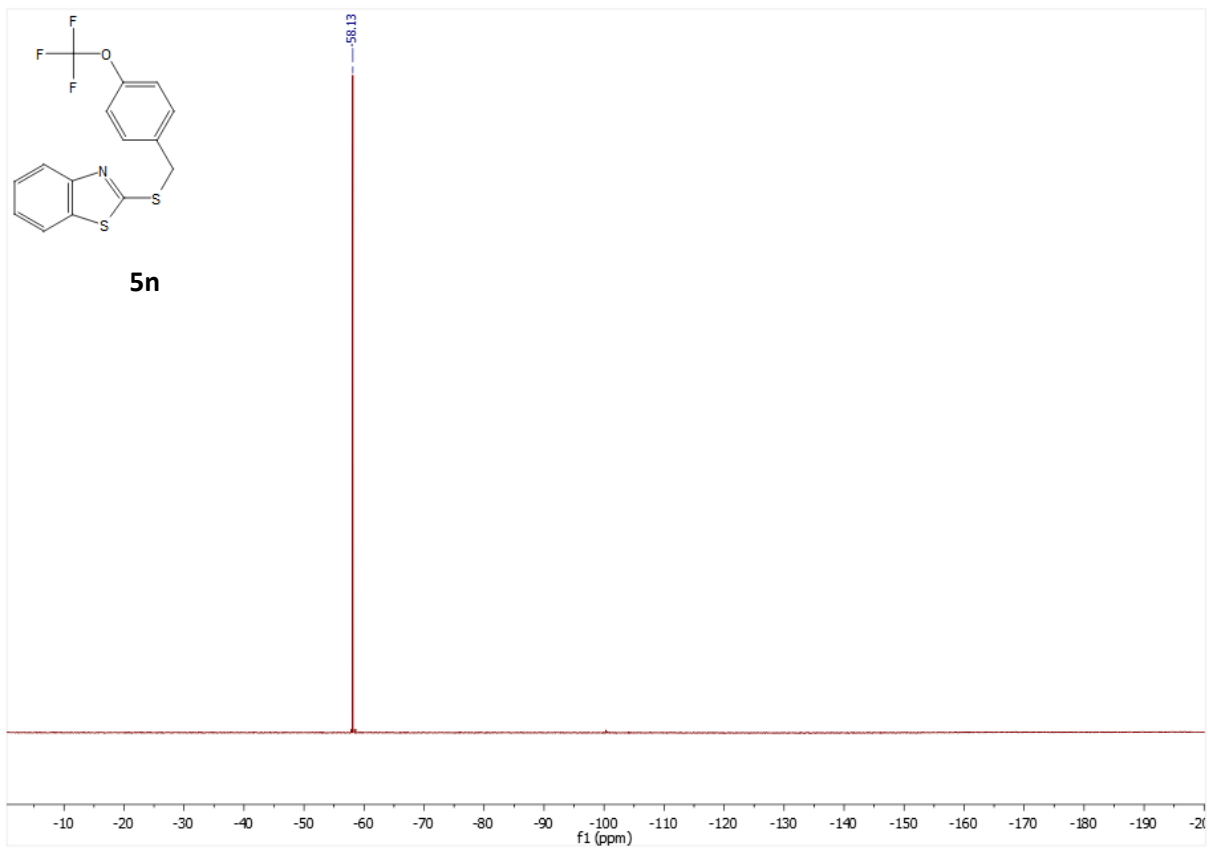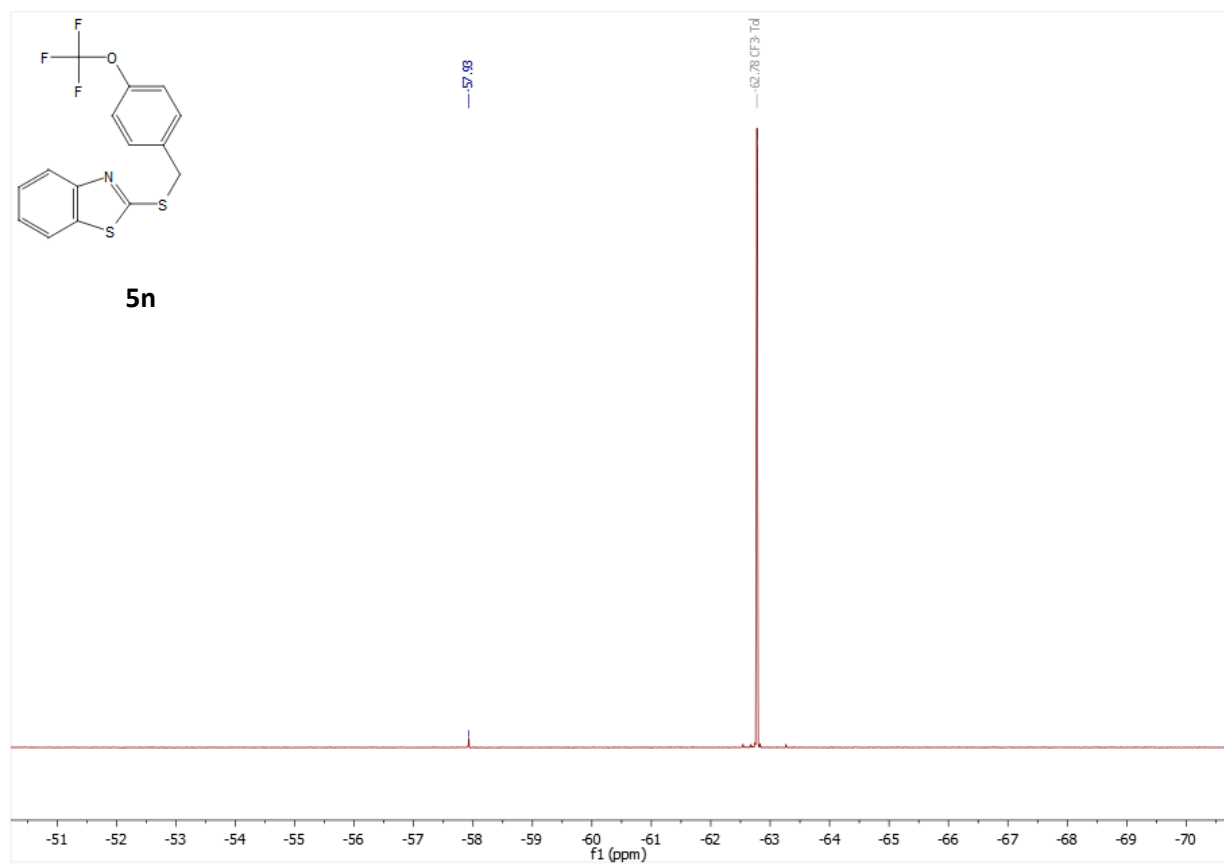

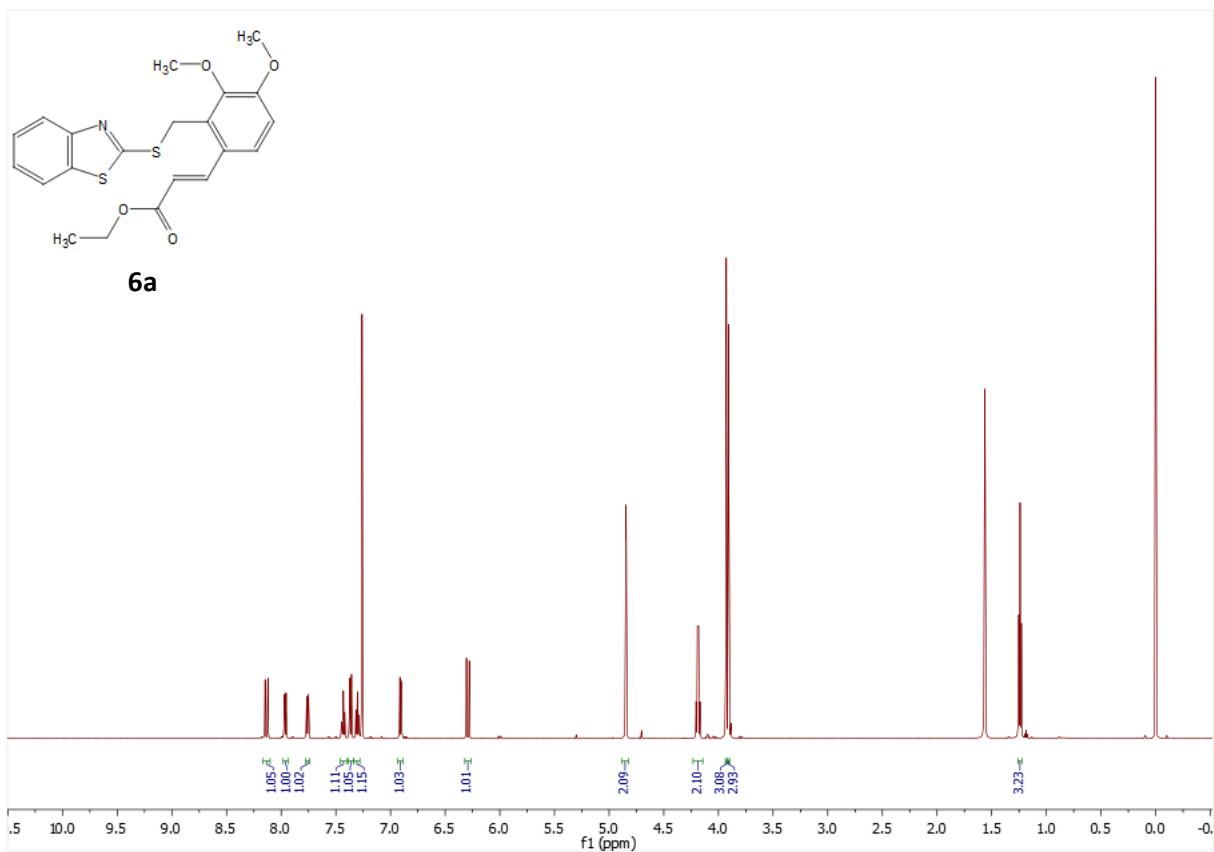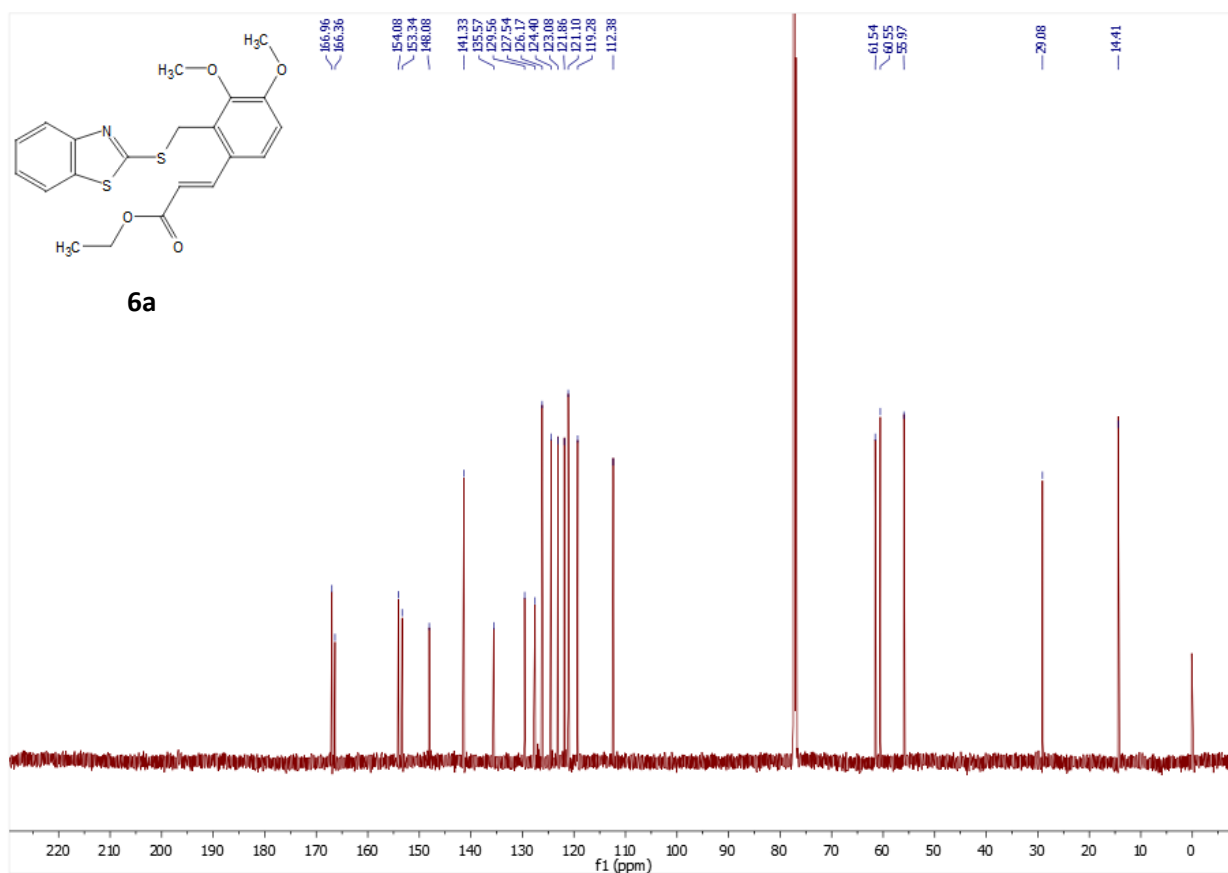

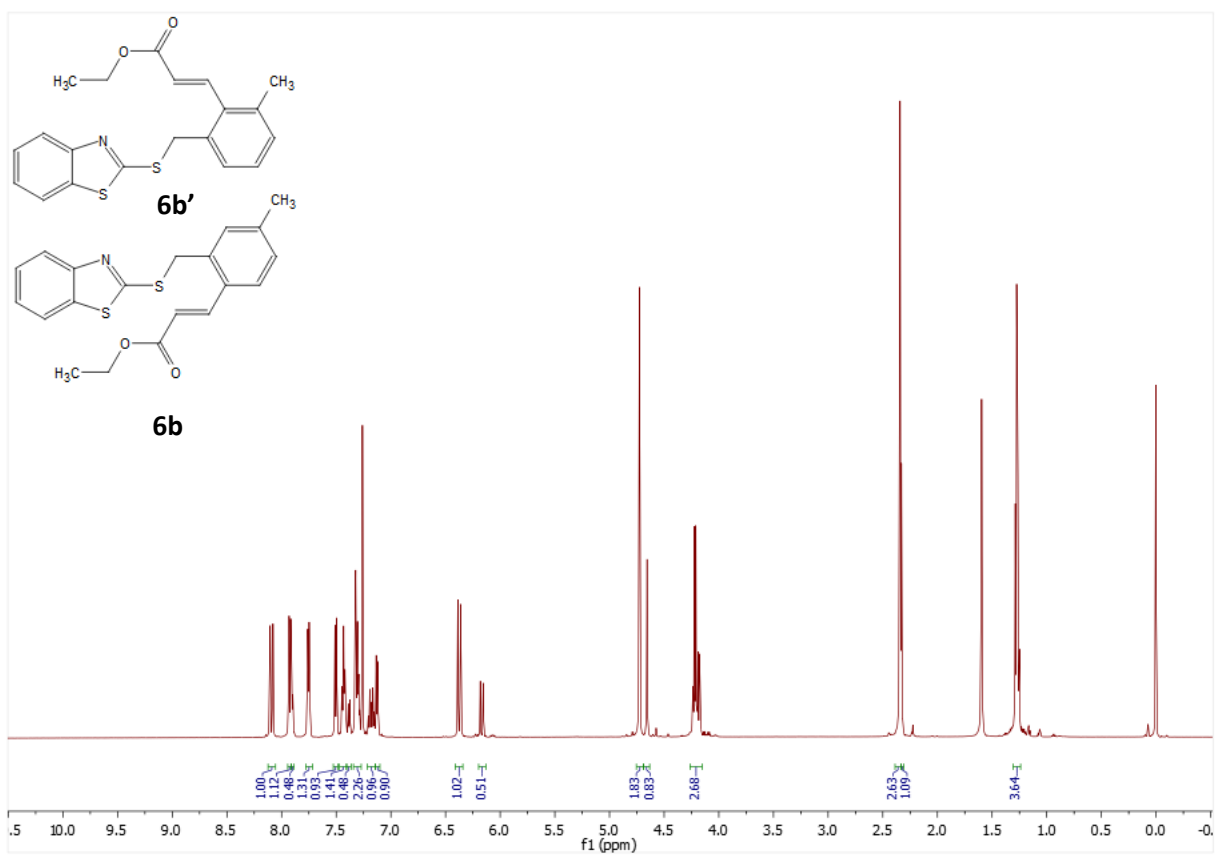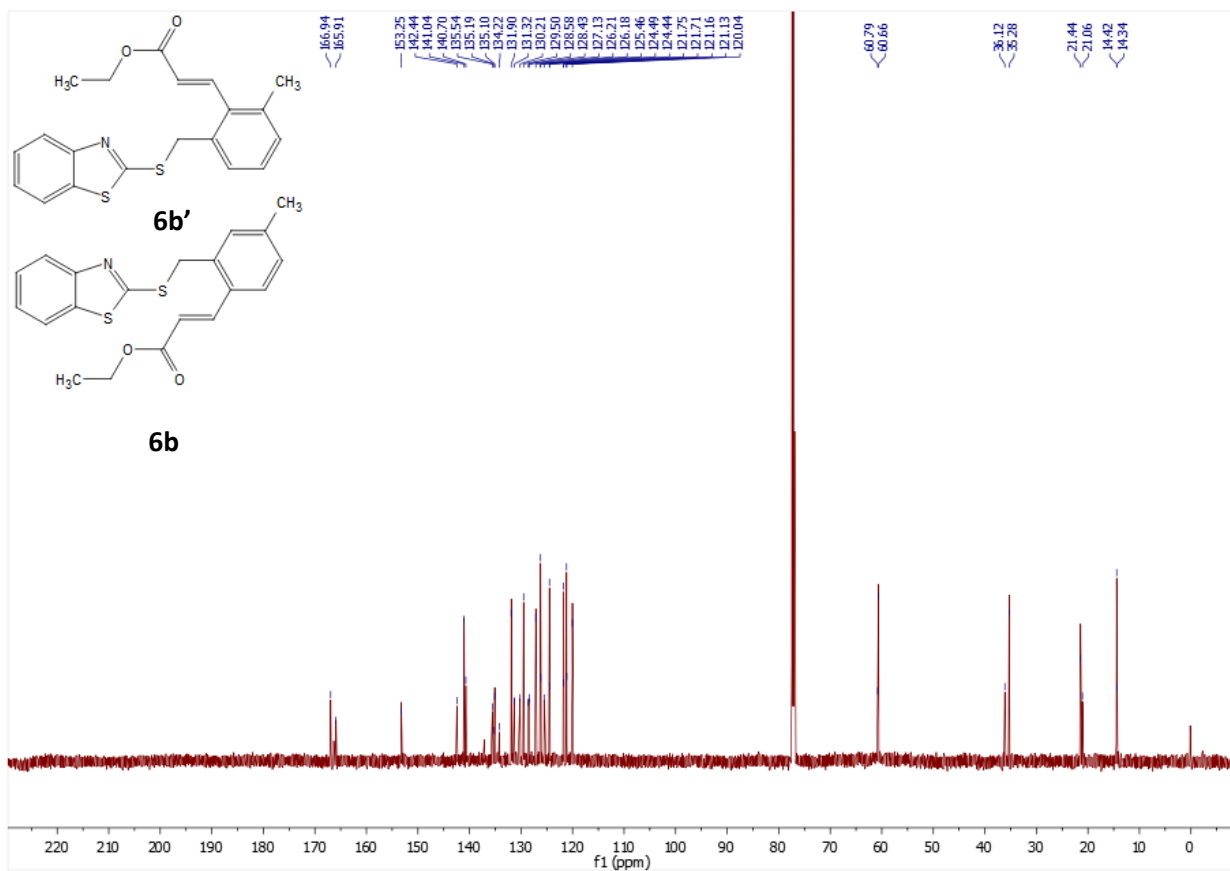

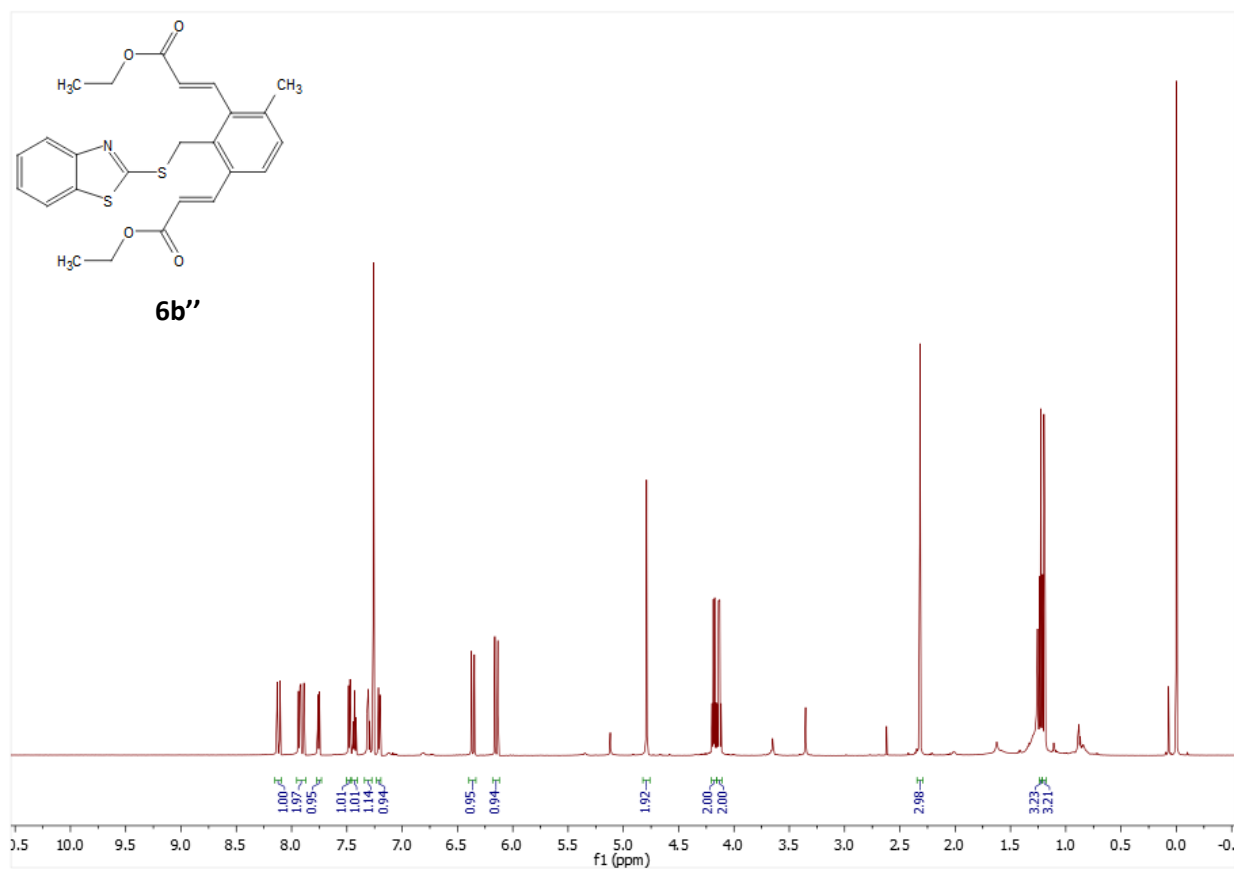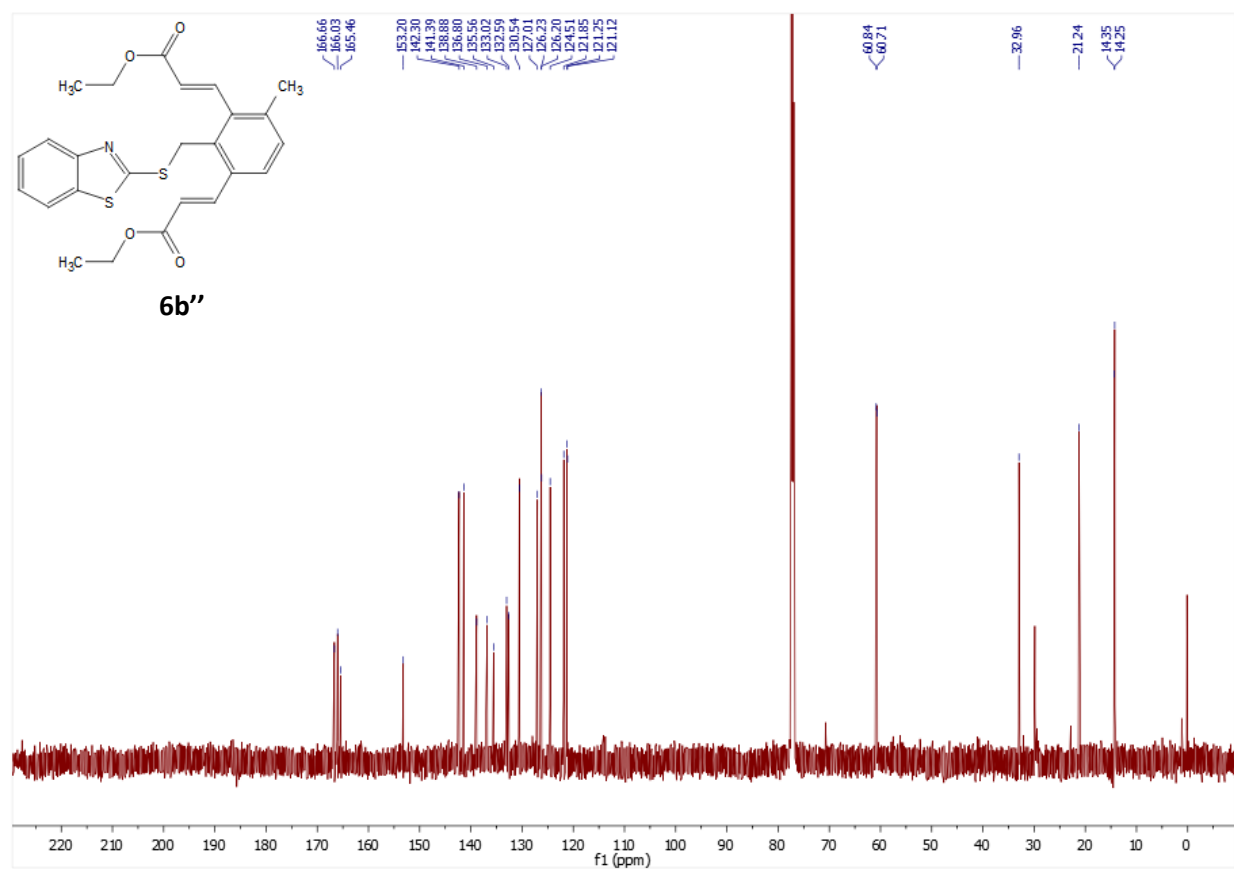

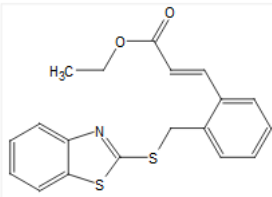

**6c**

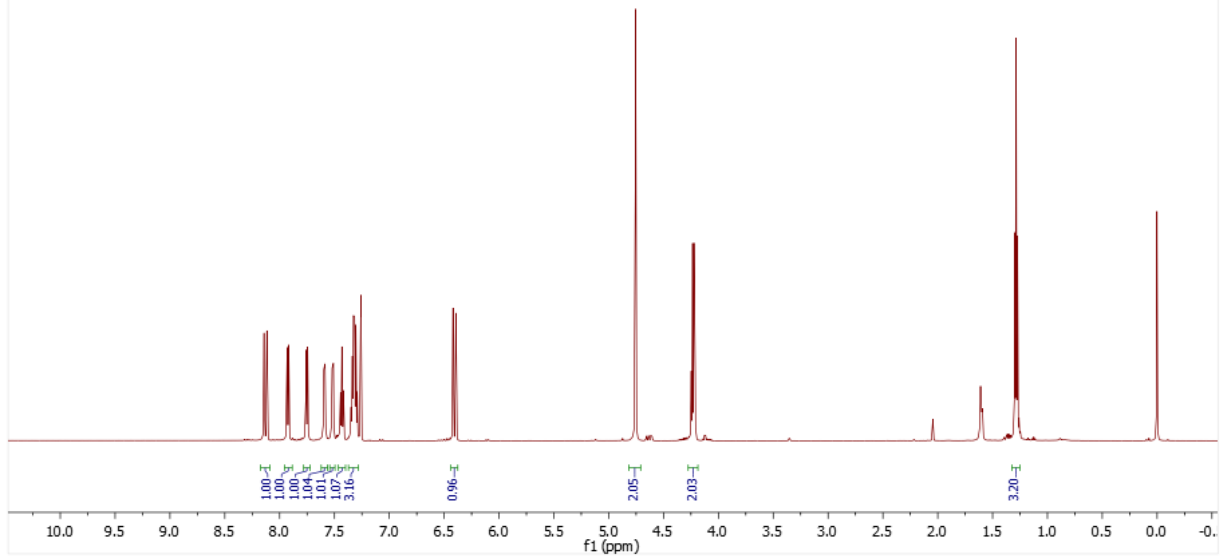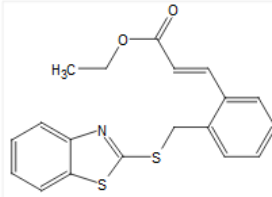

**6c**

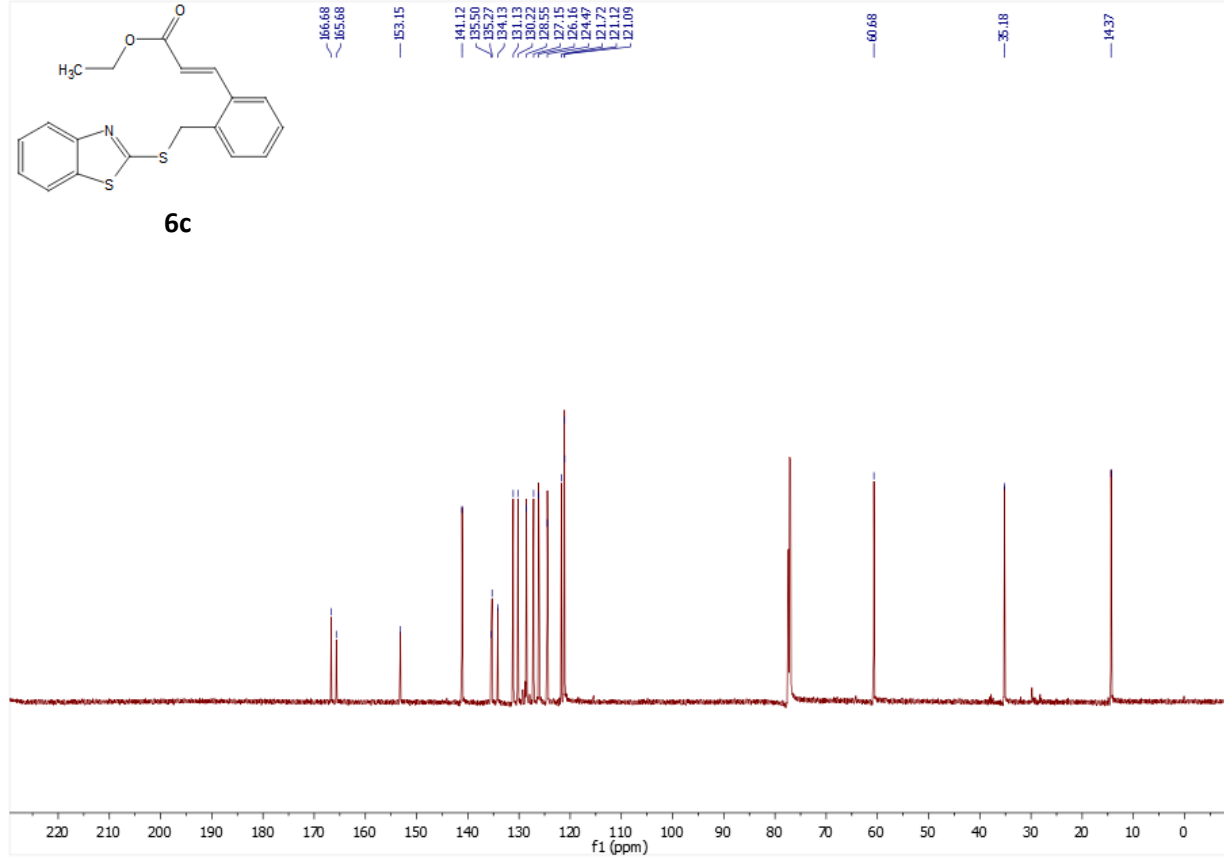

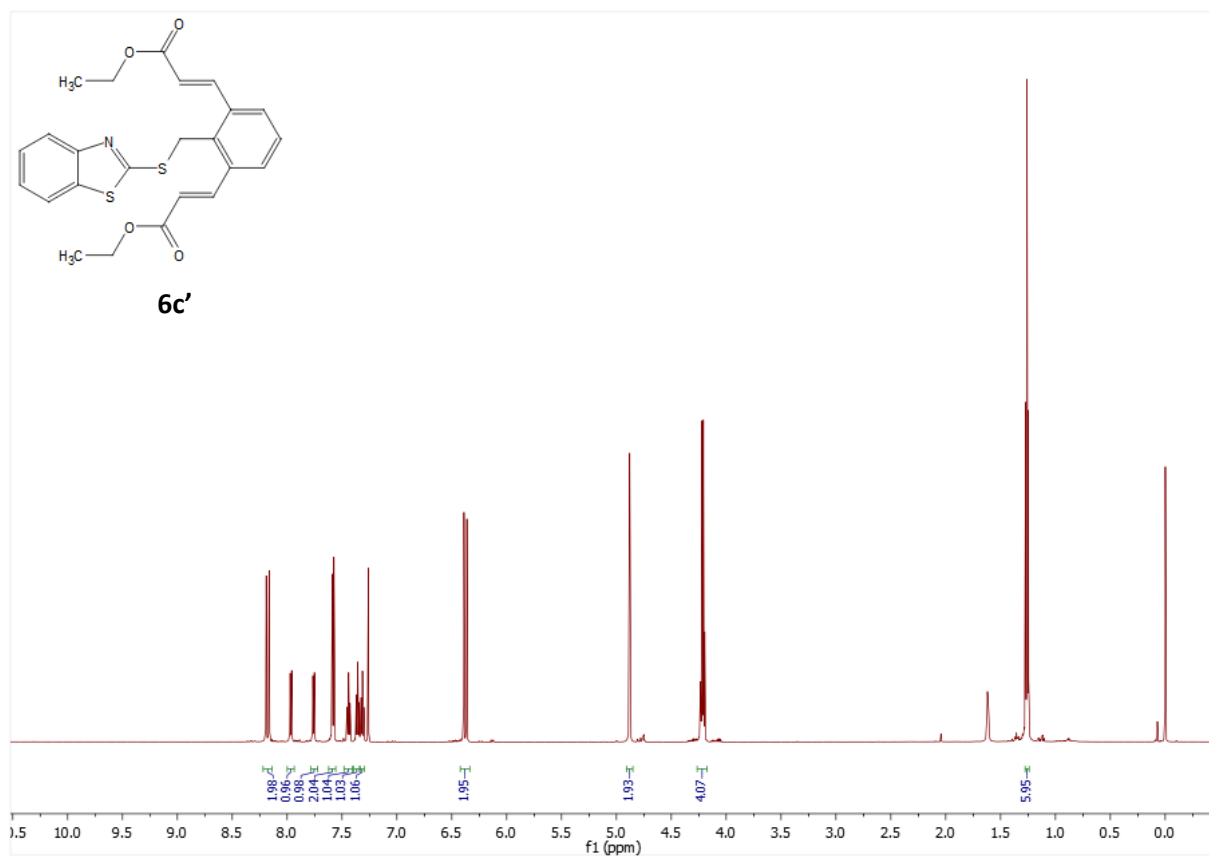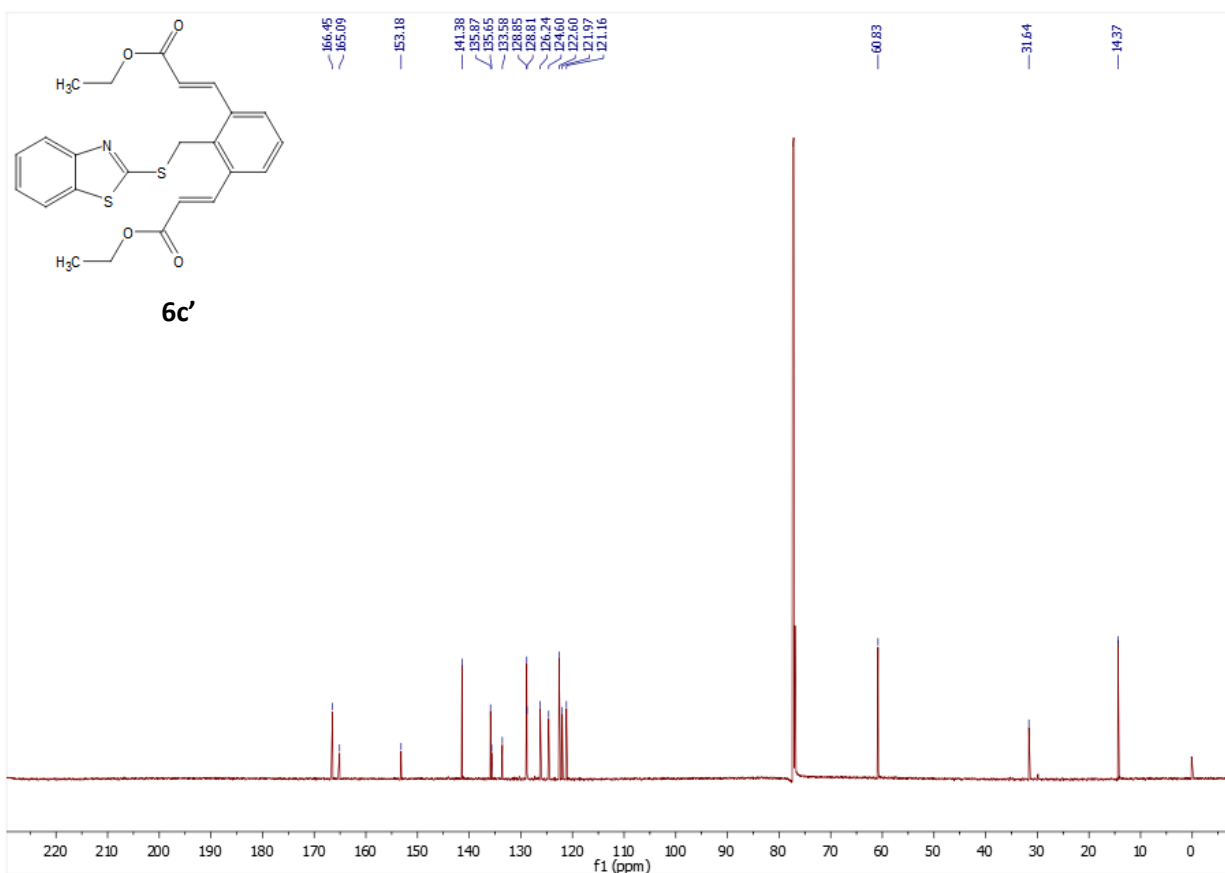



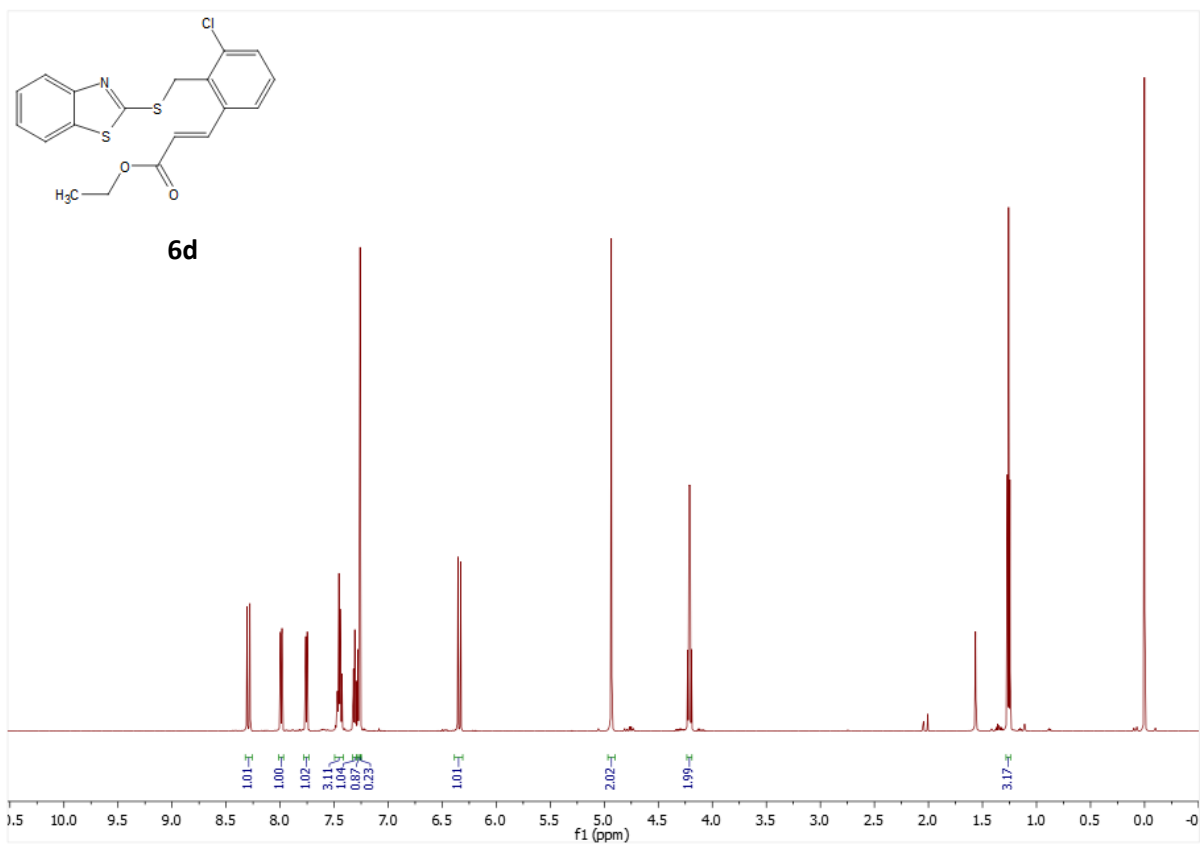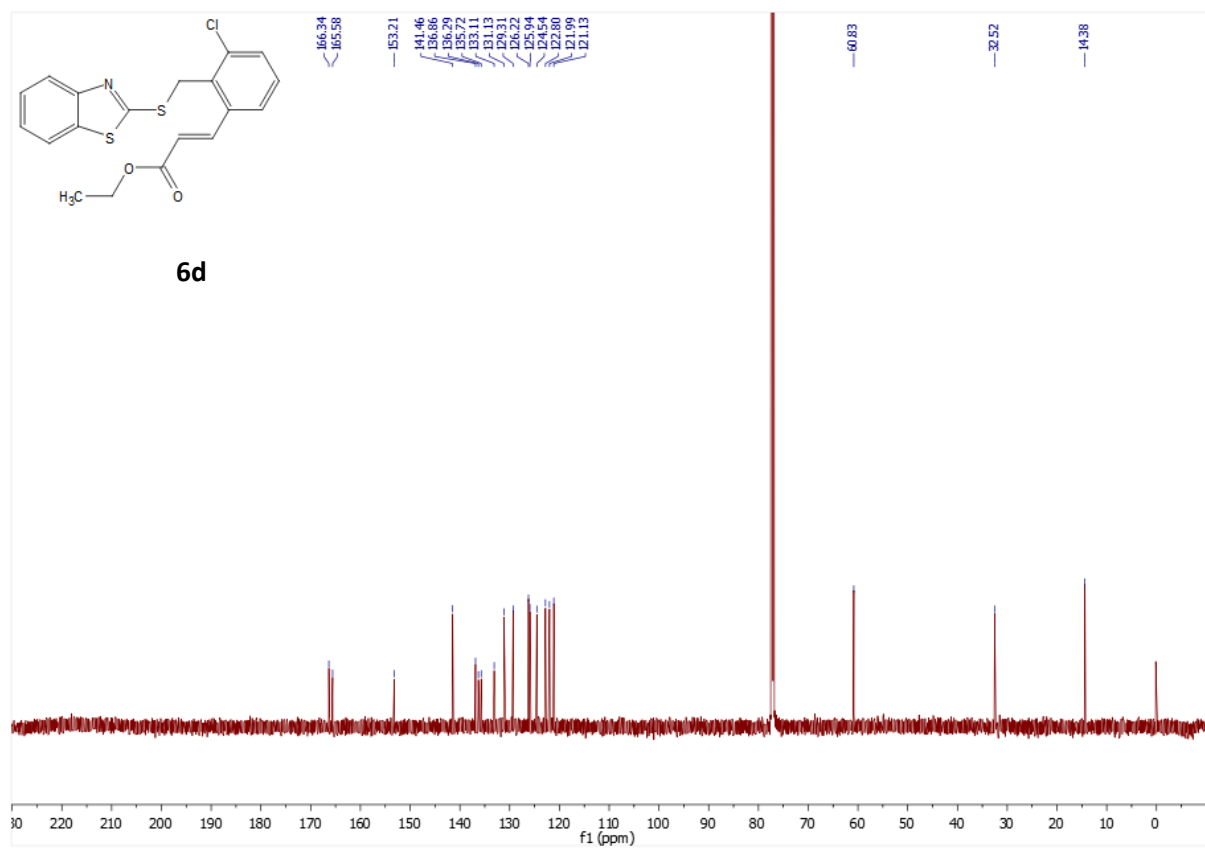

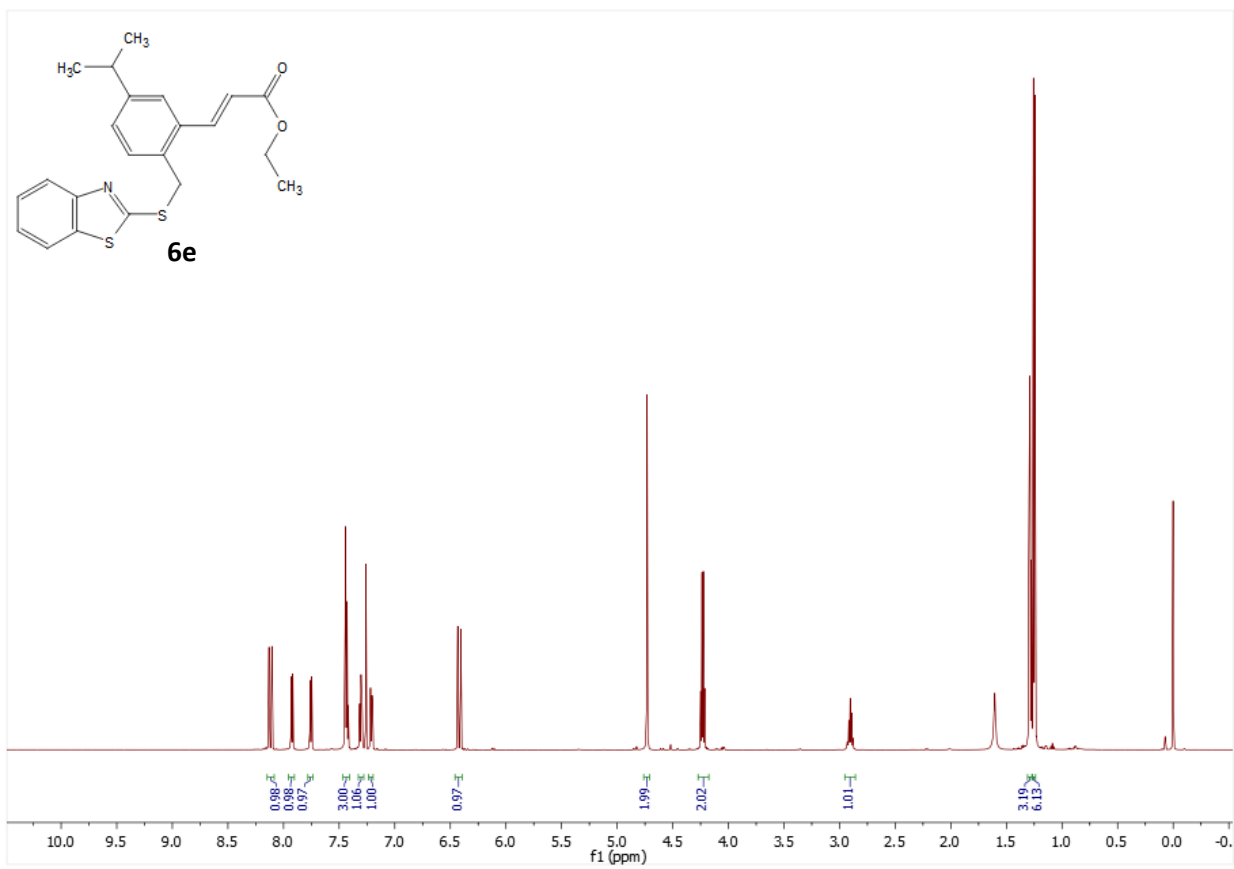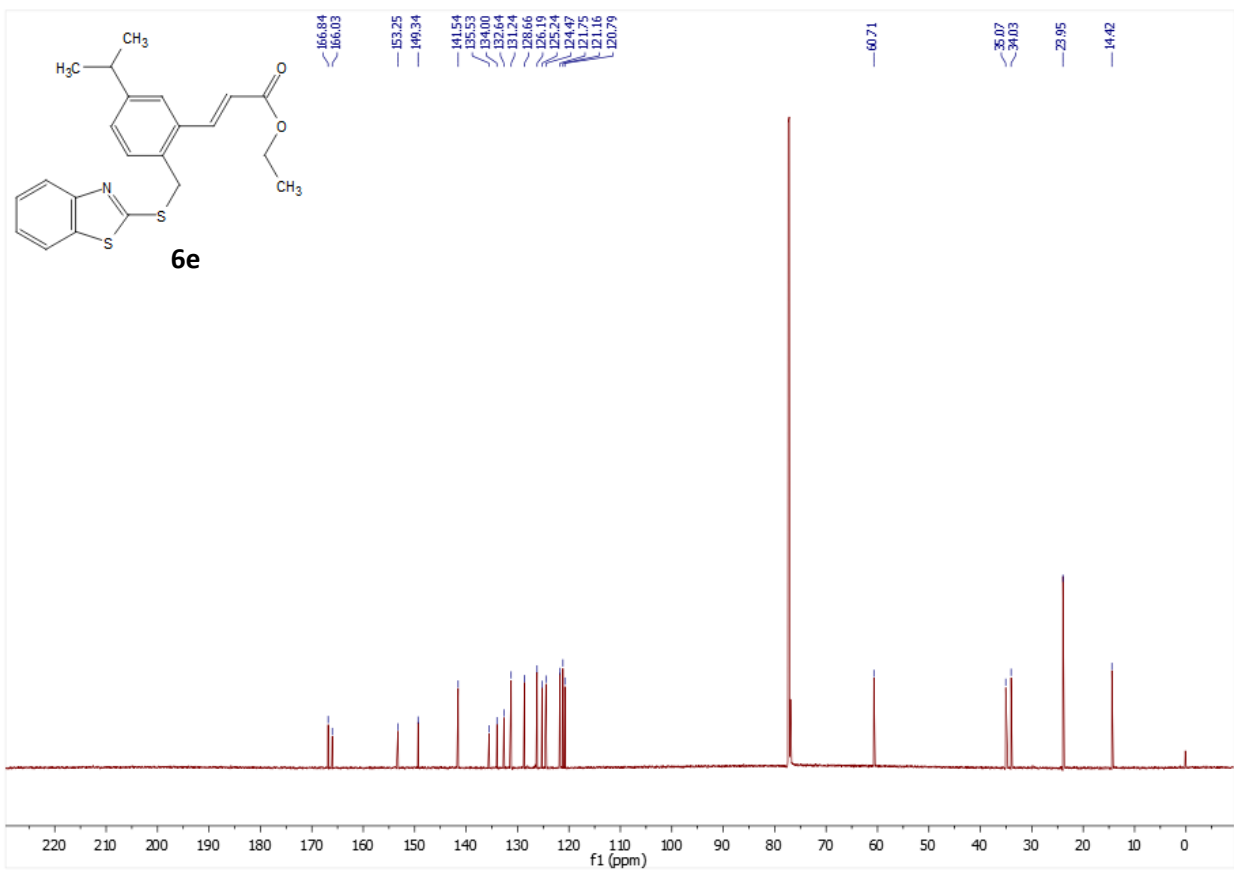

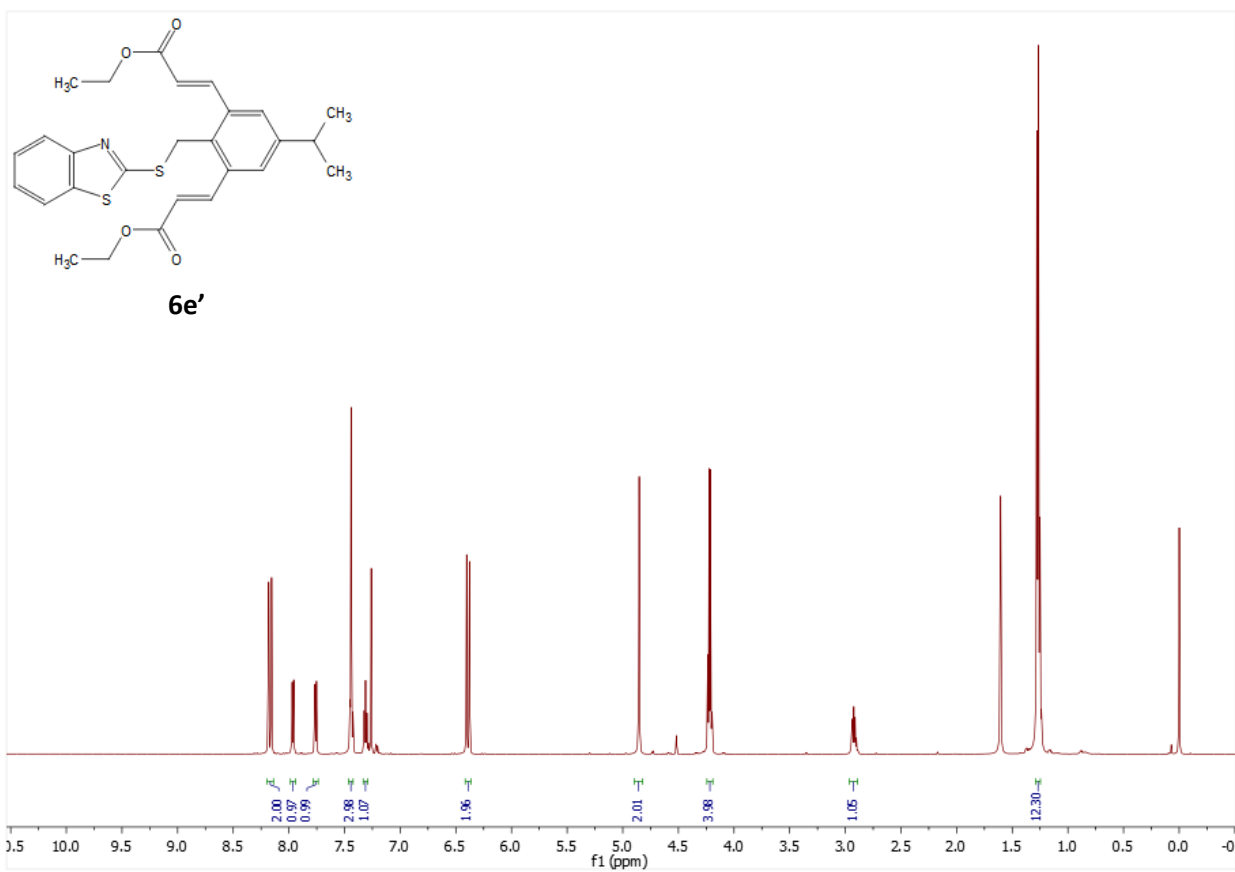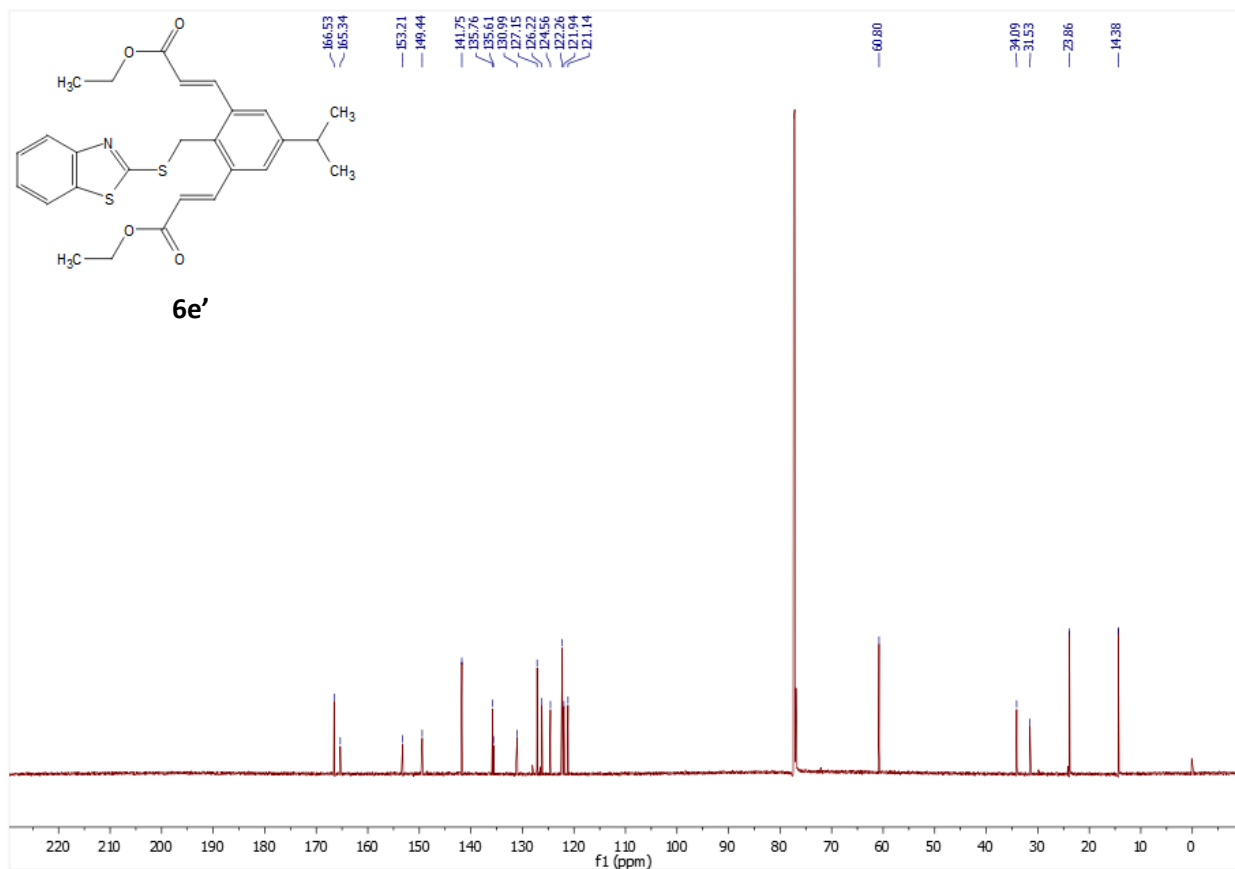

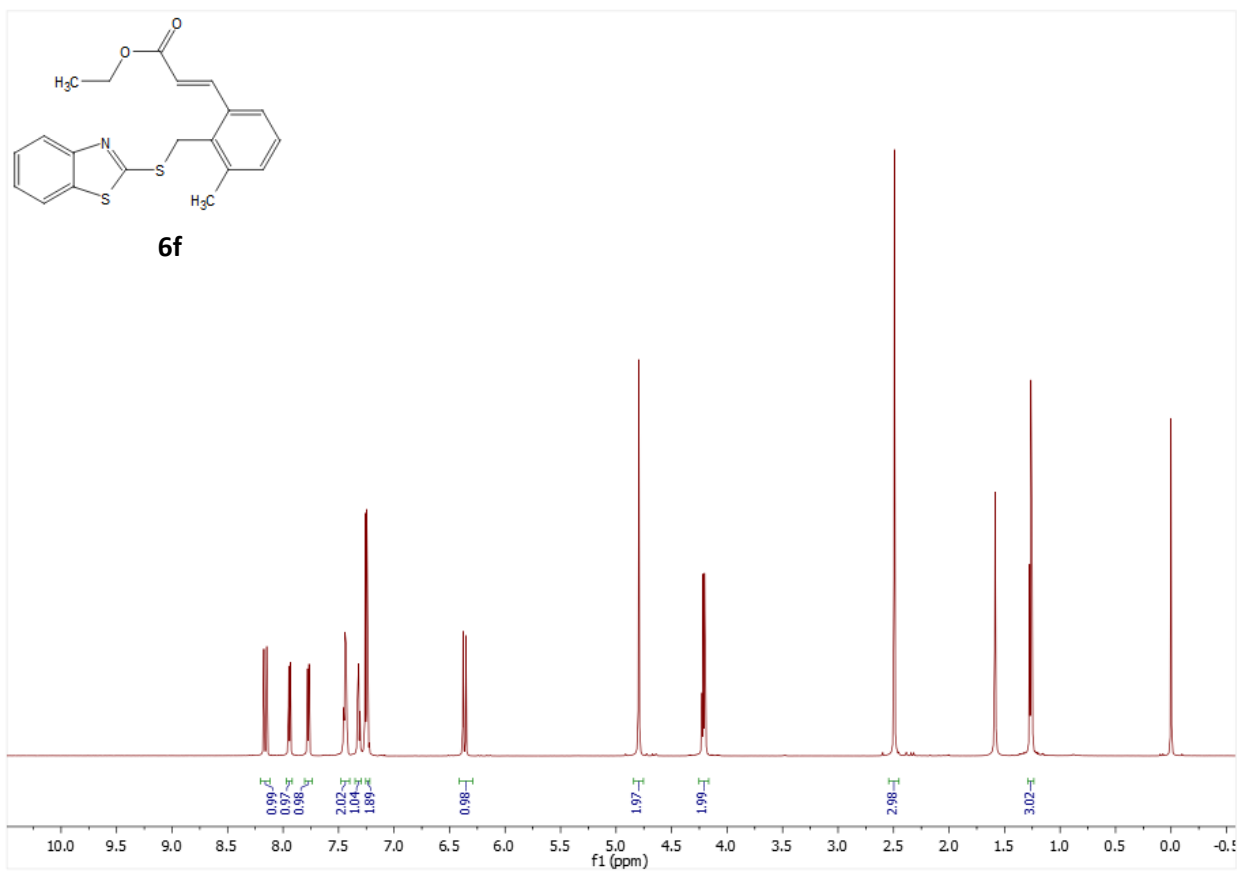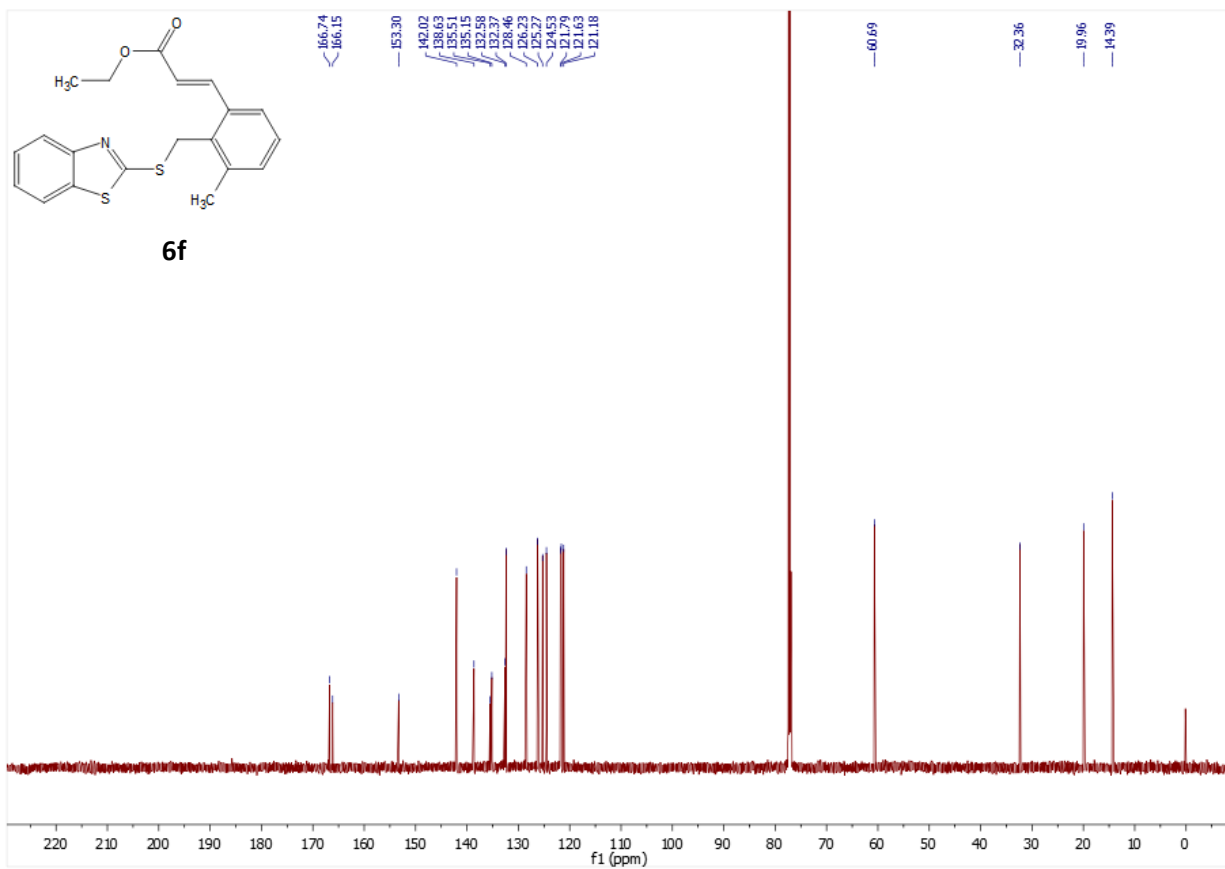

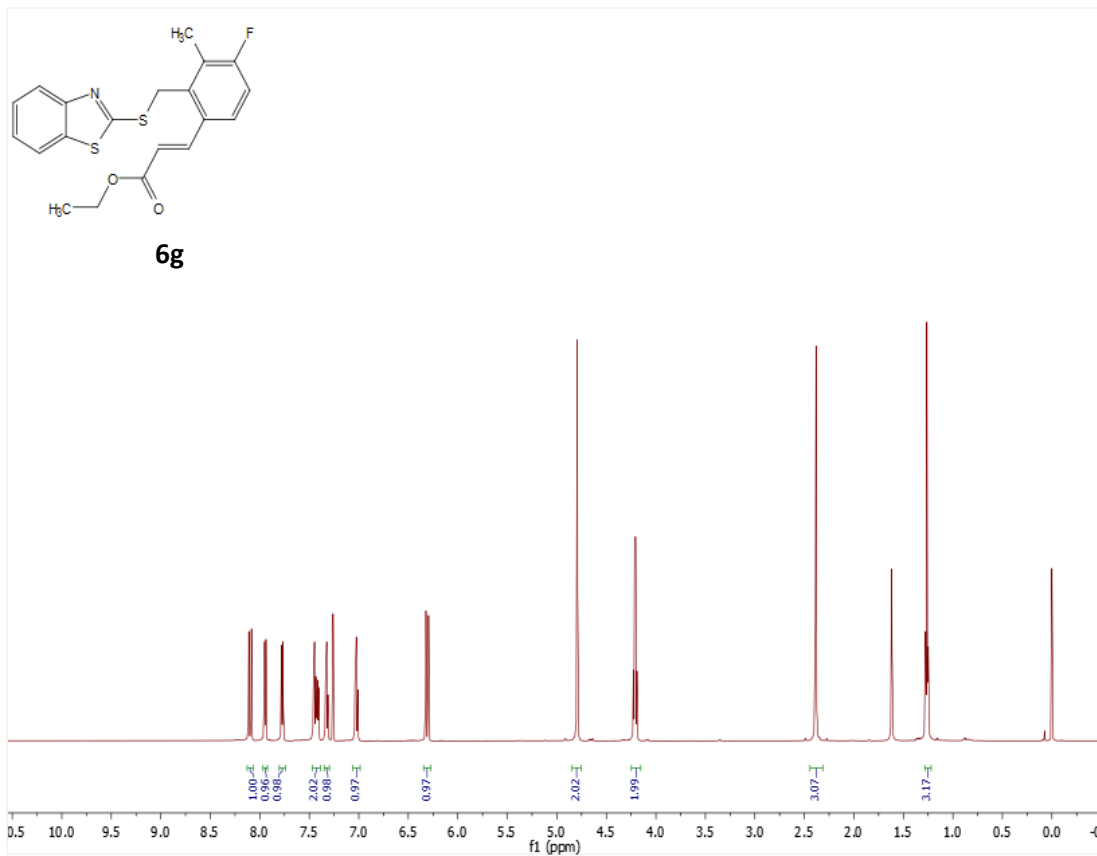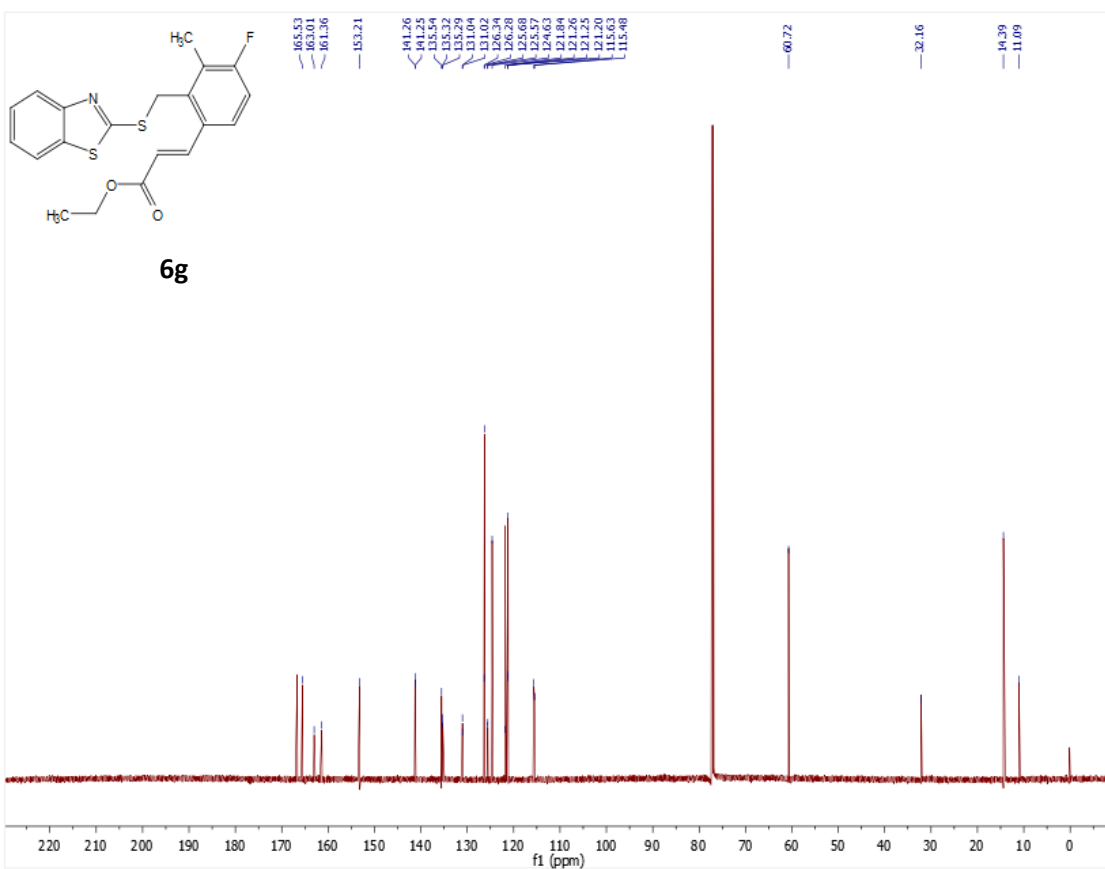

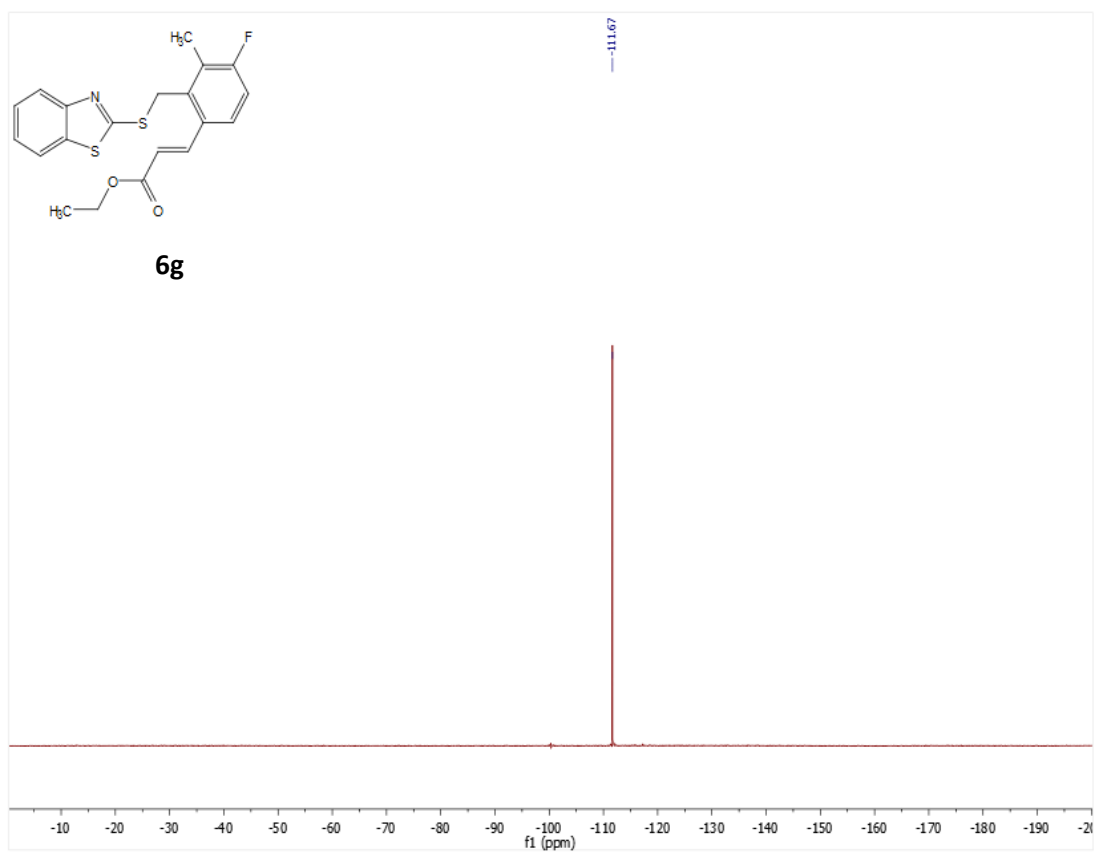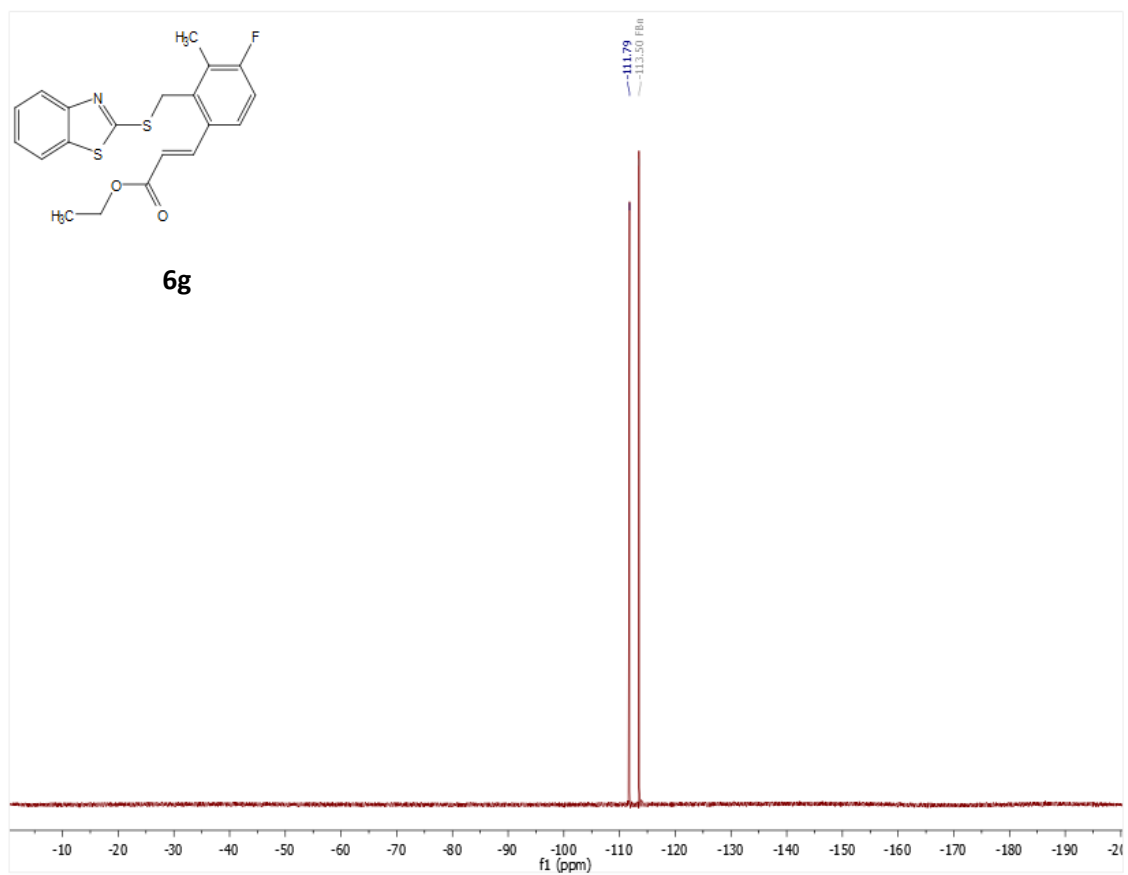

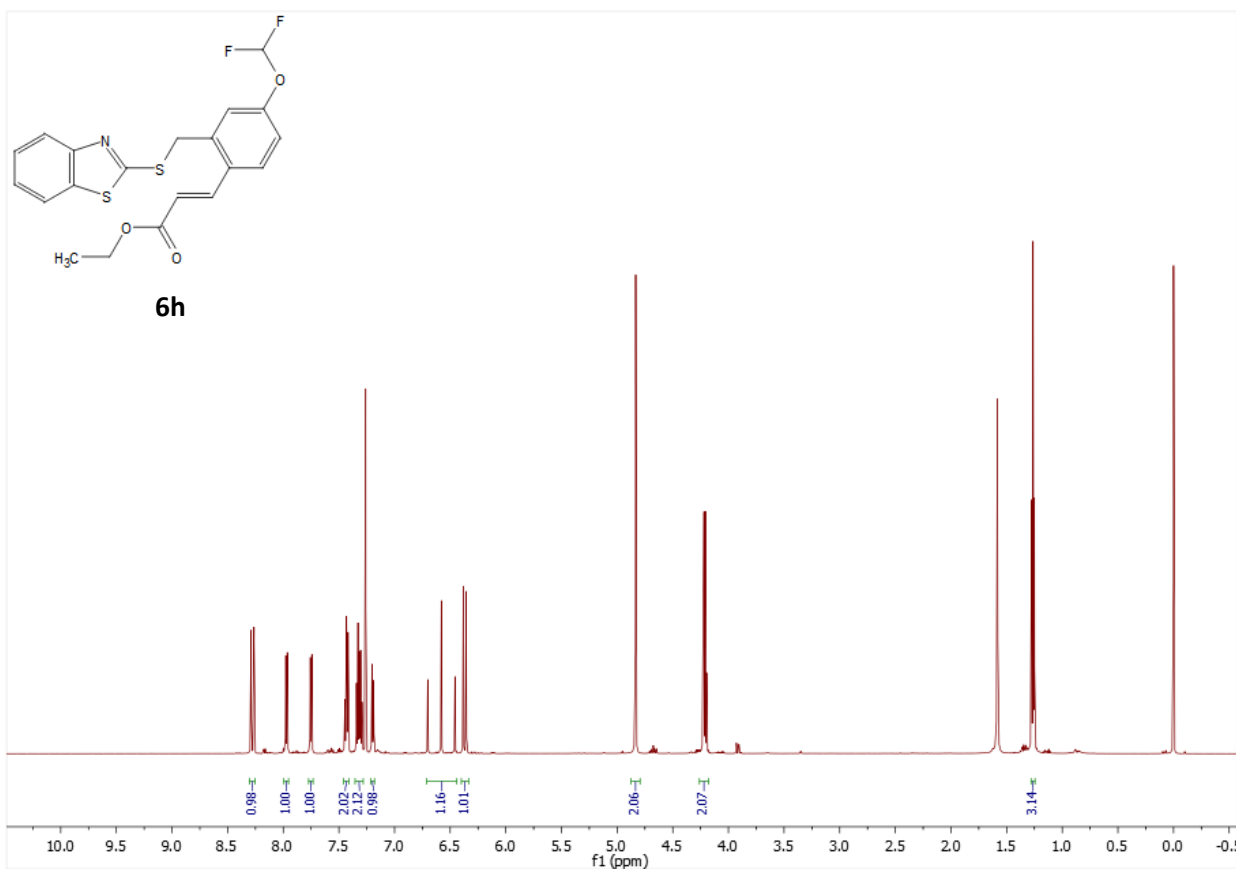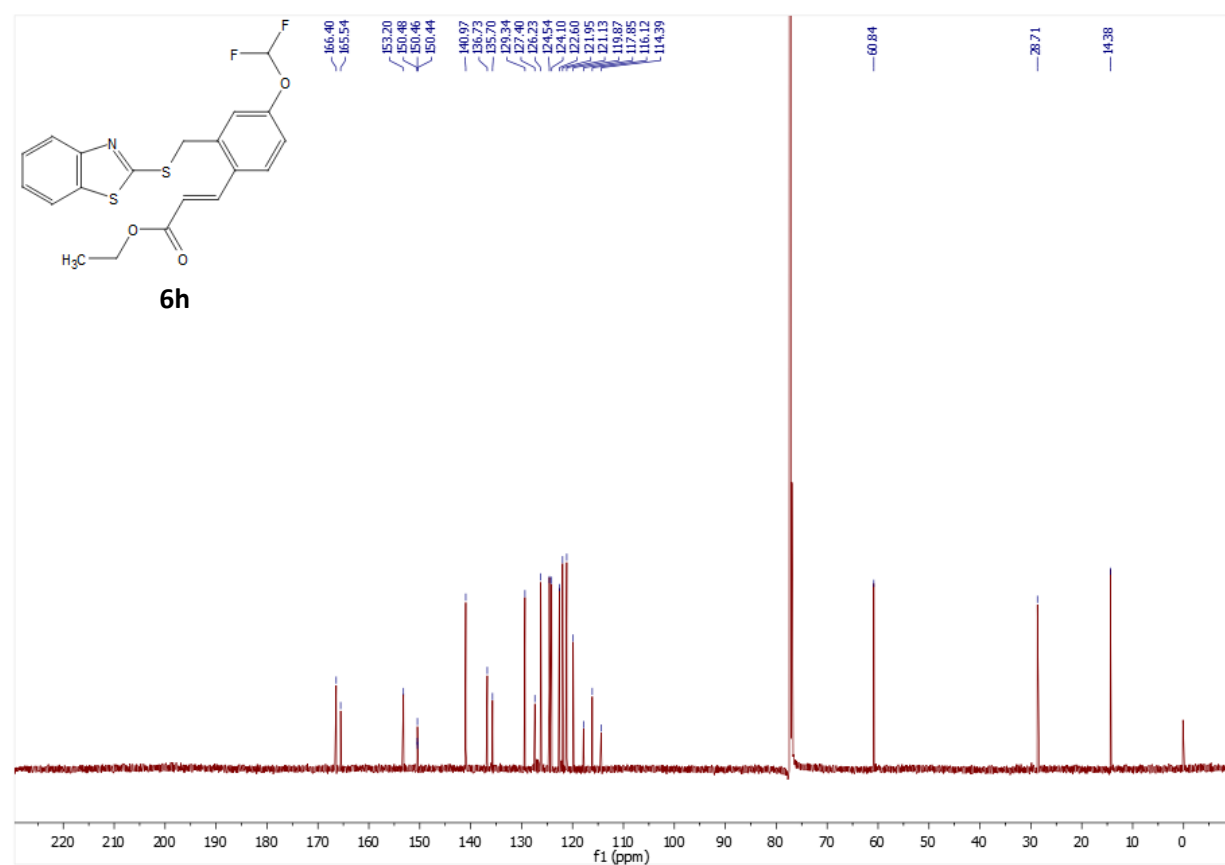

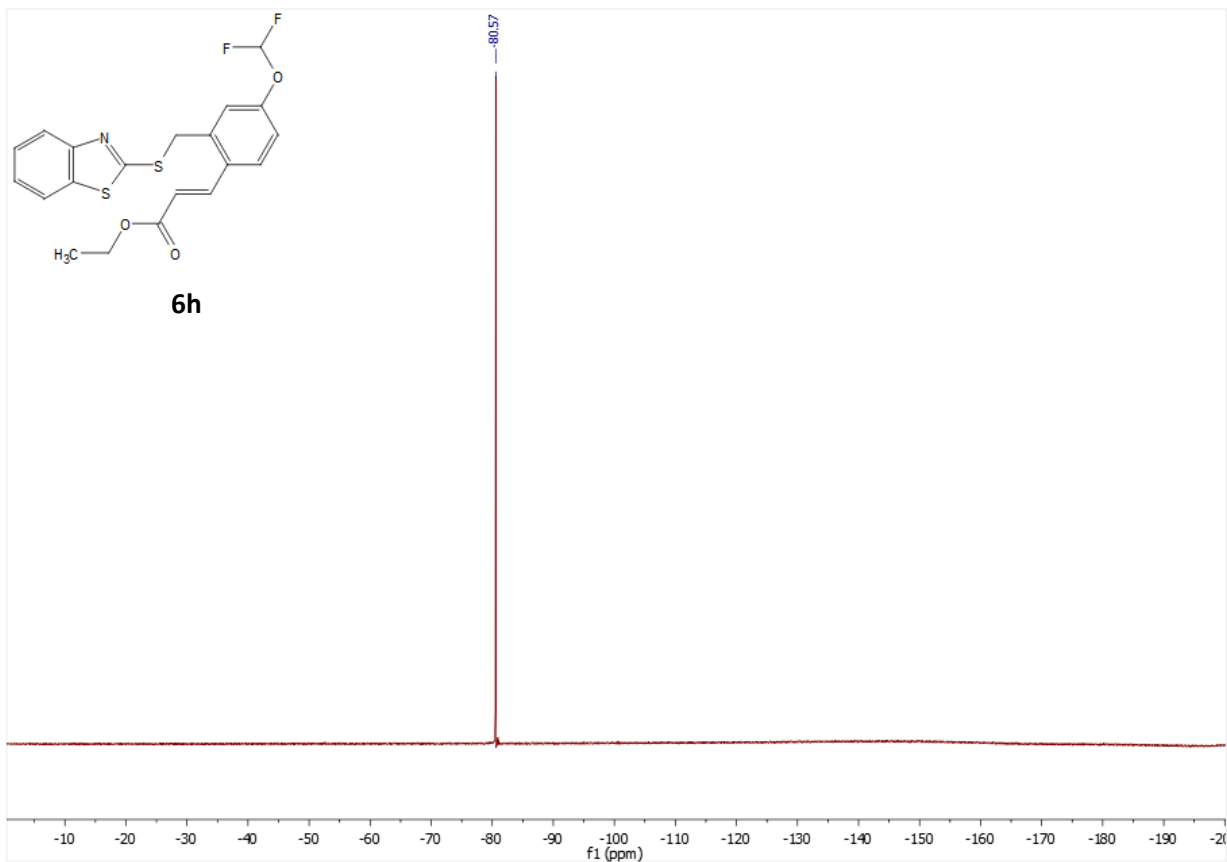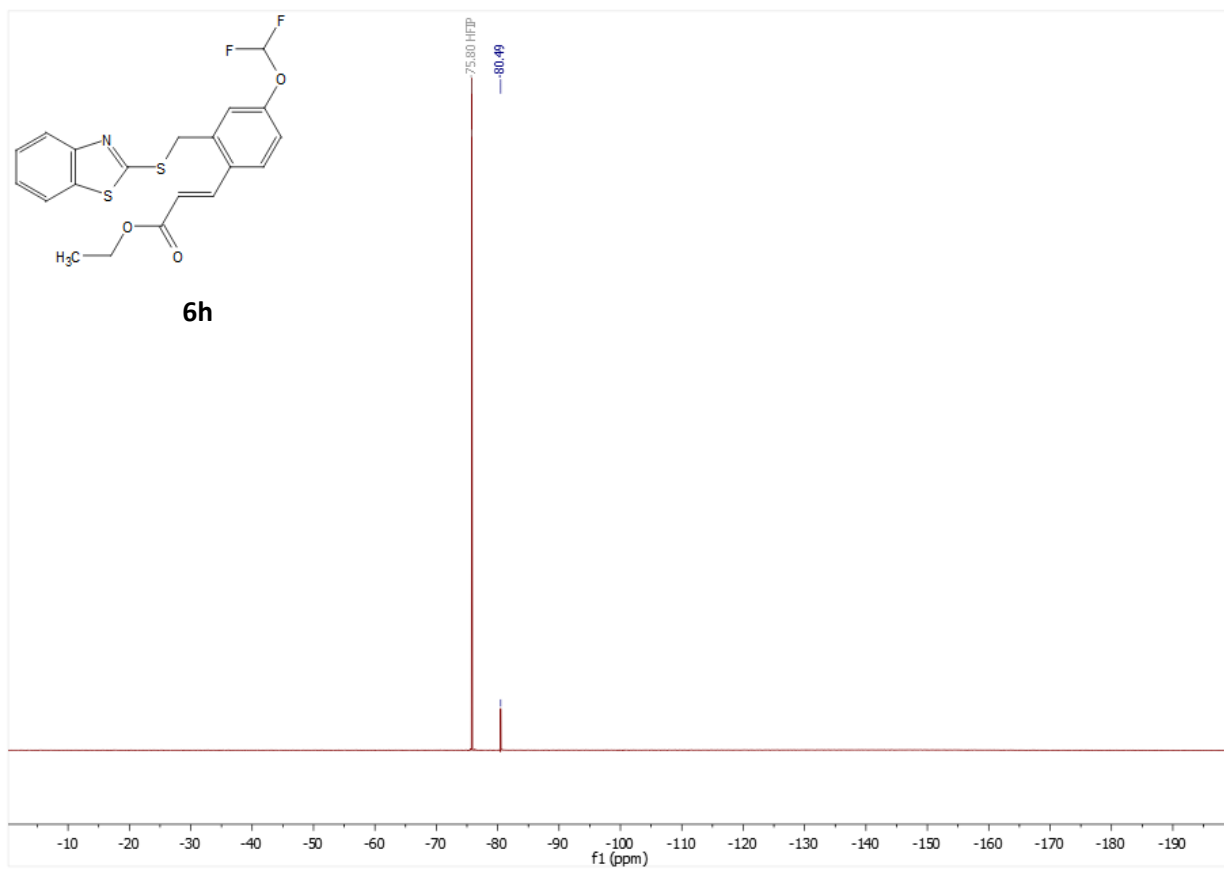



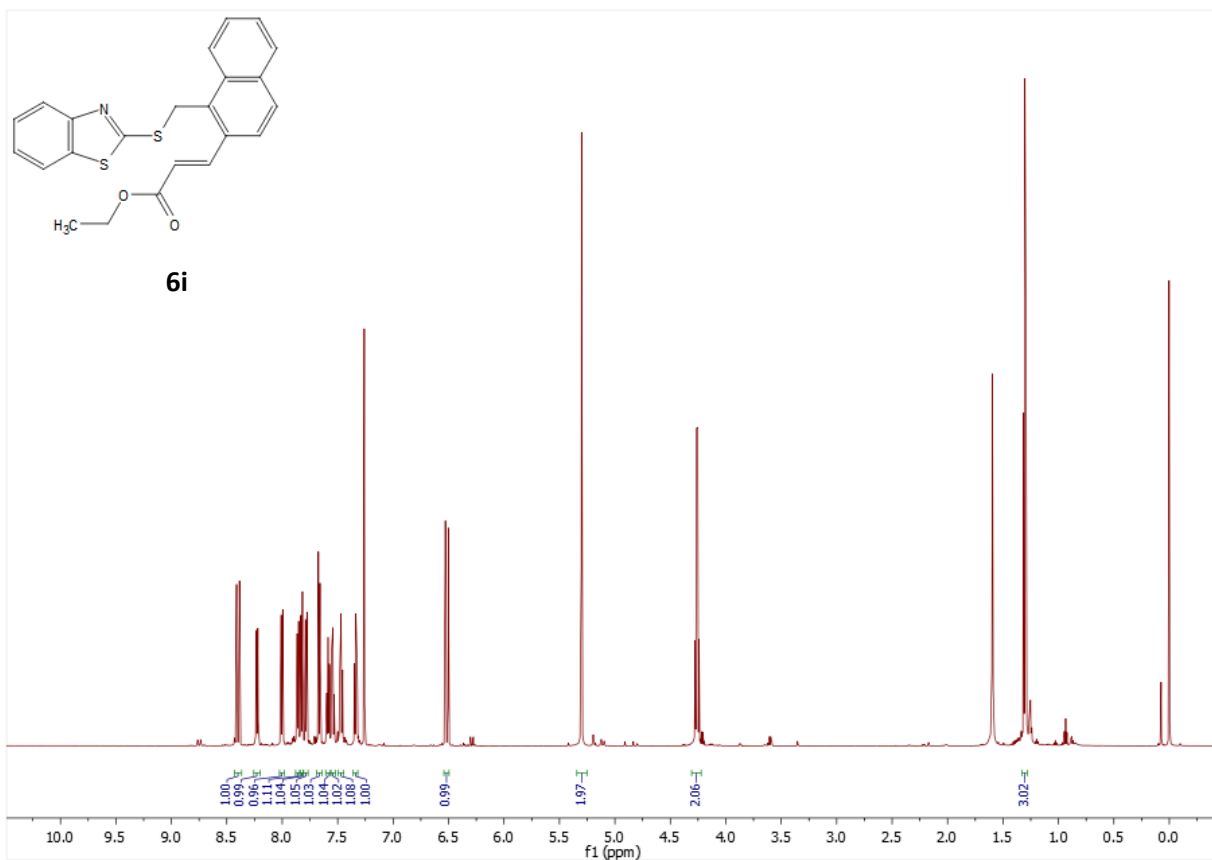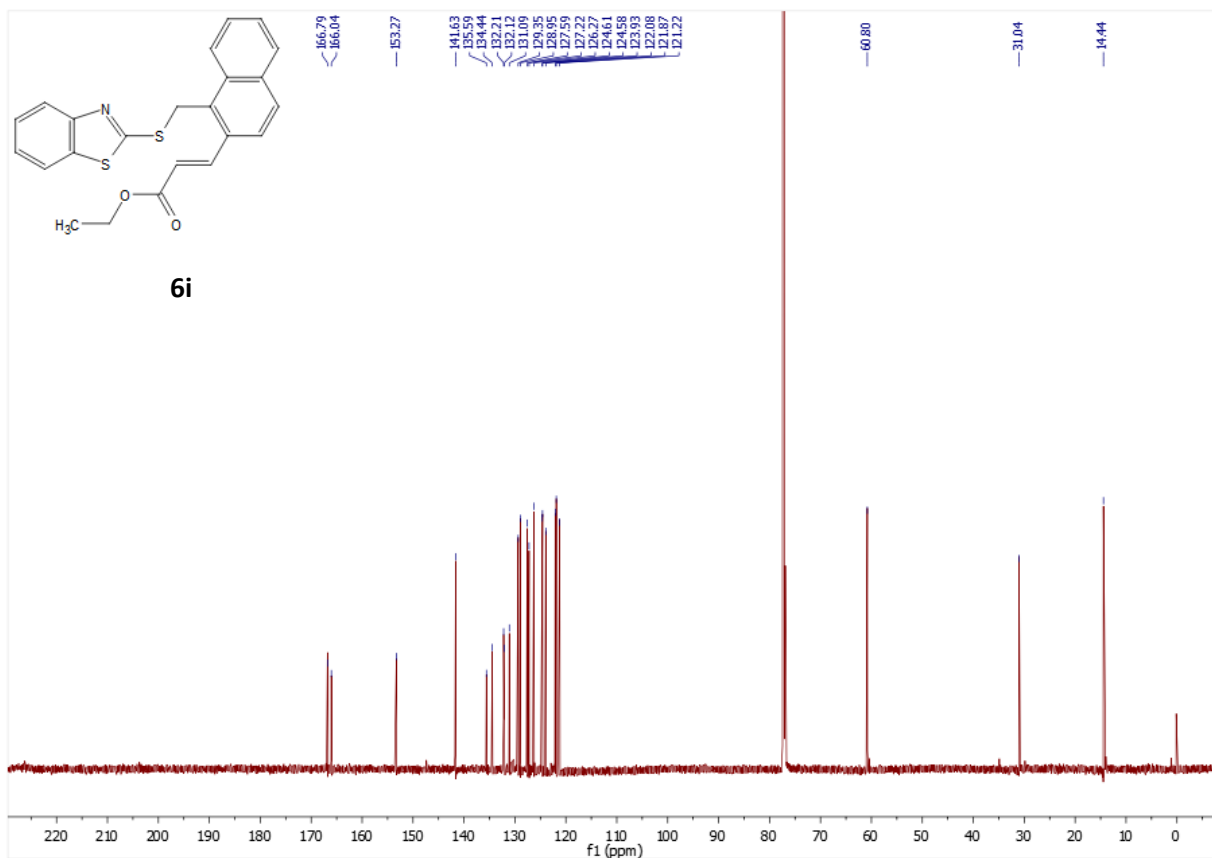

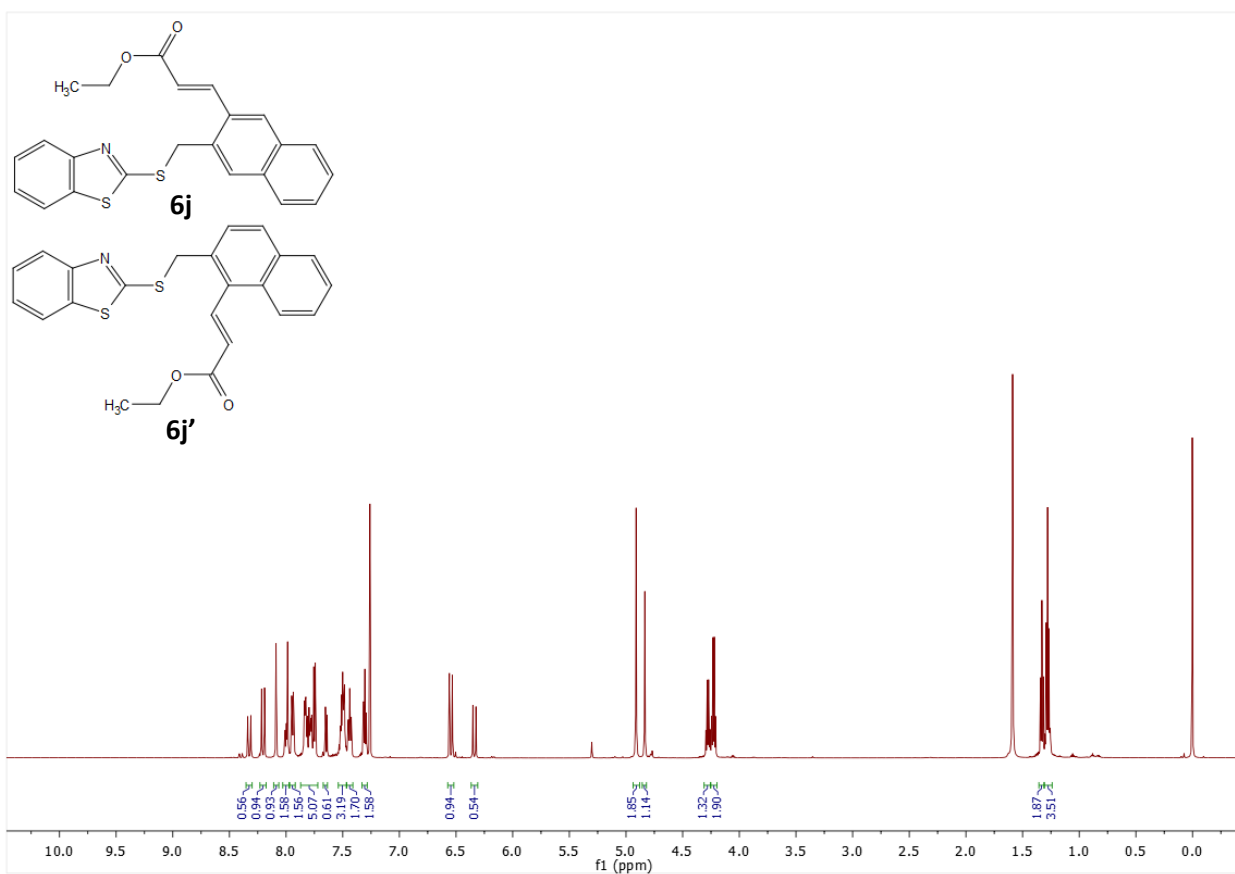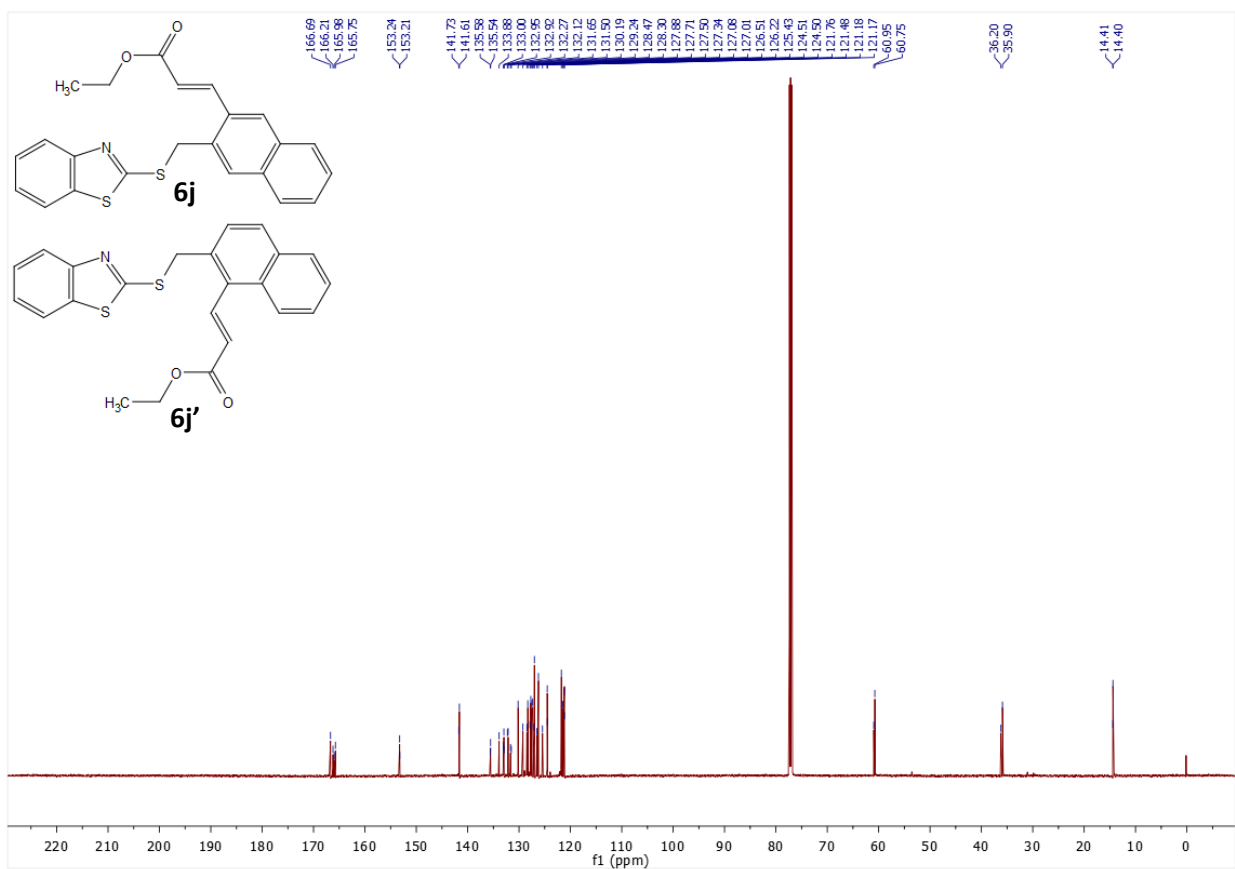

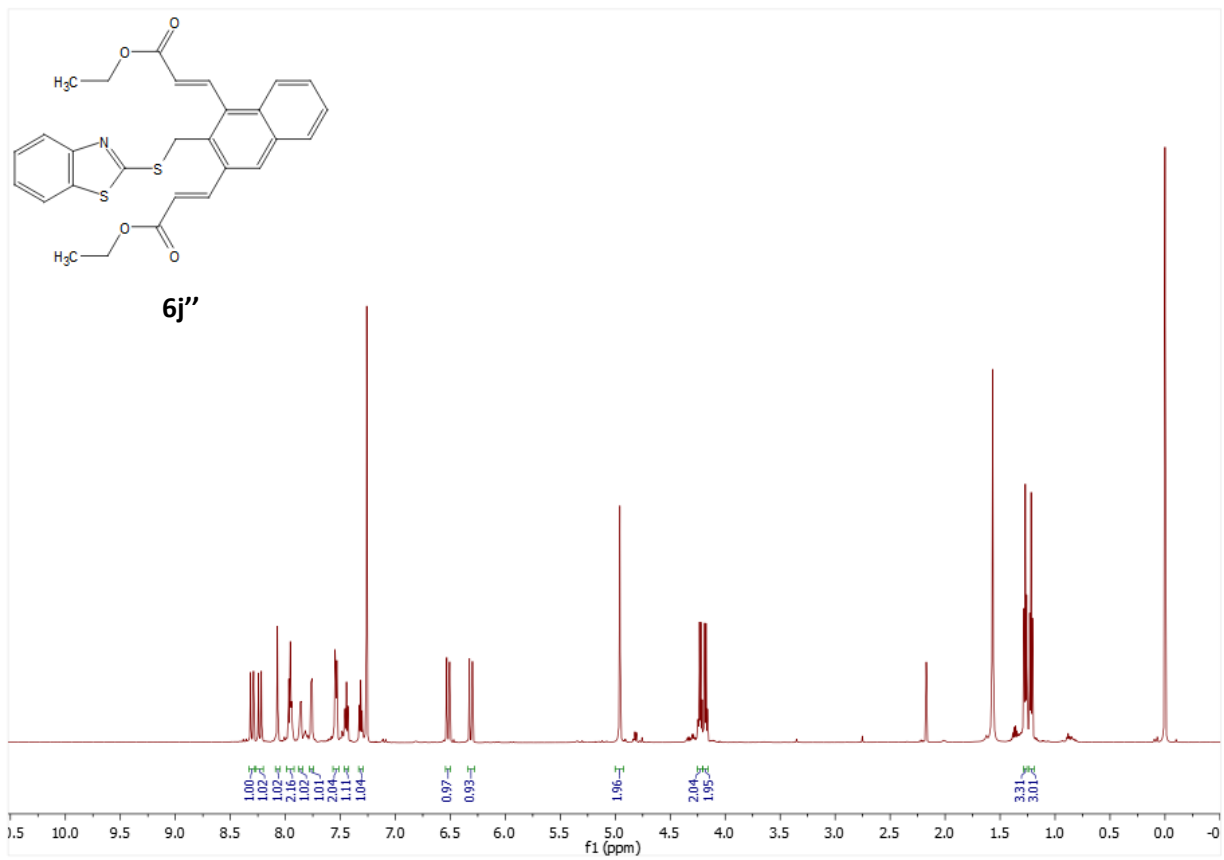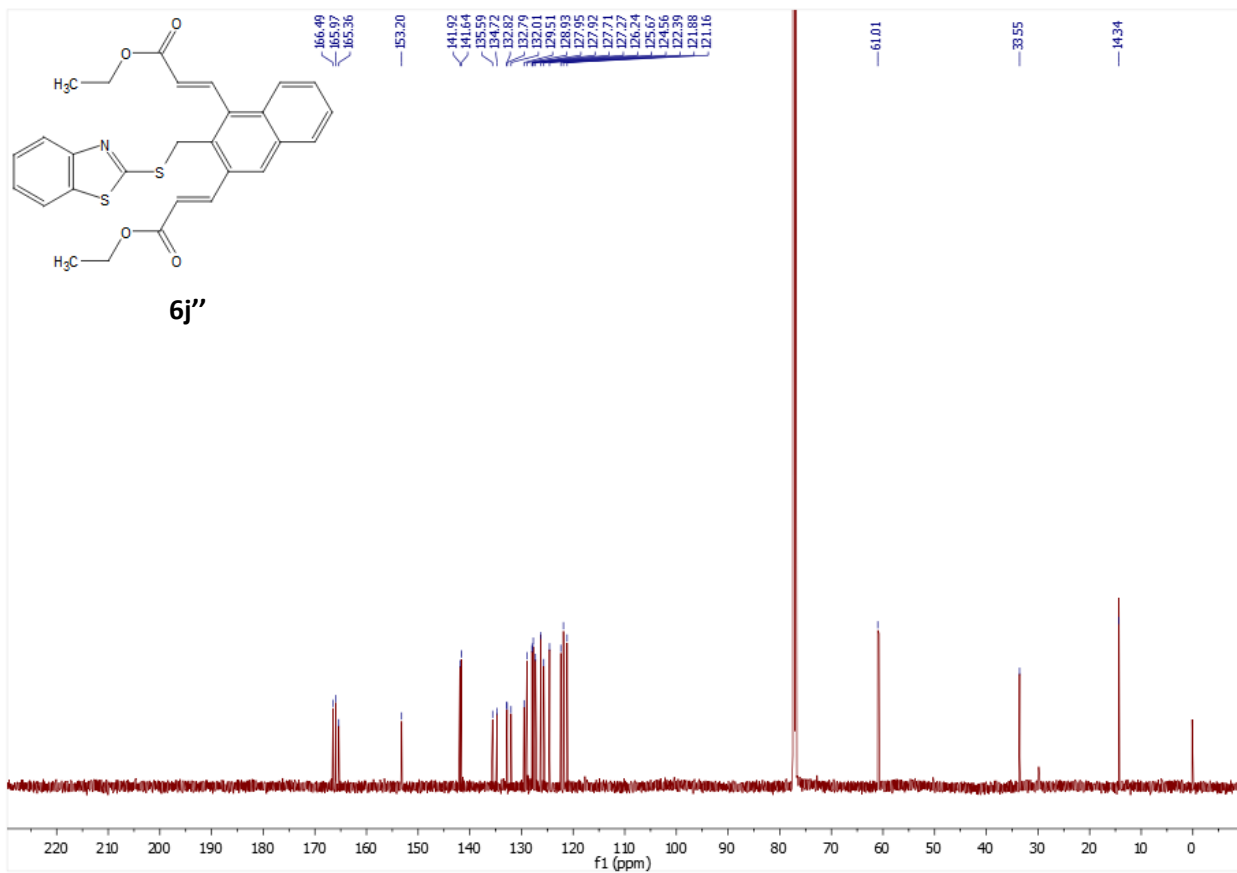

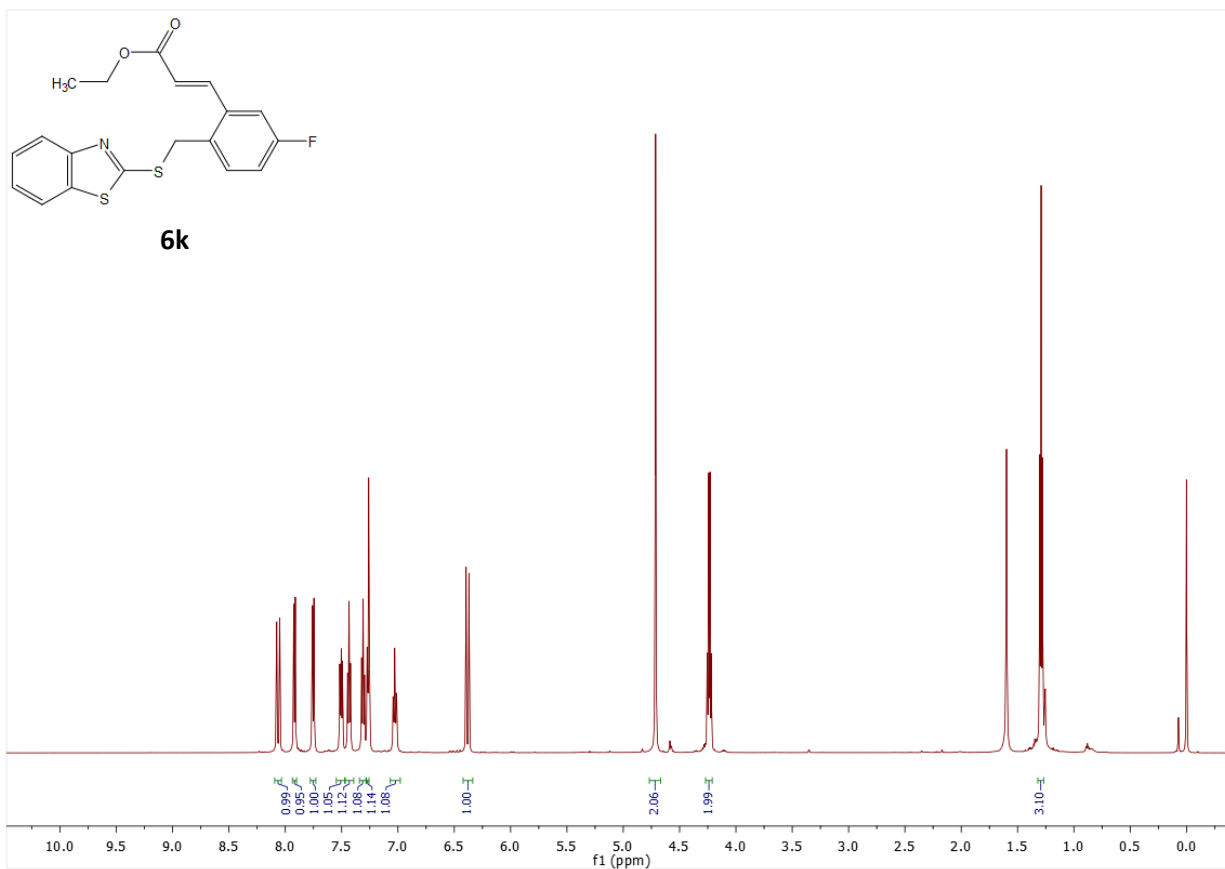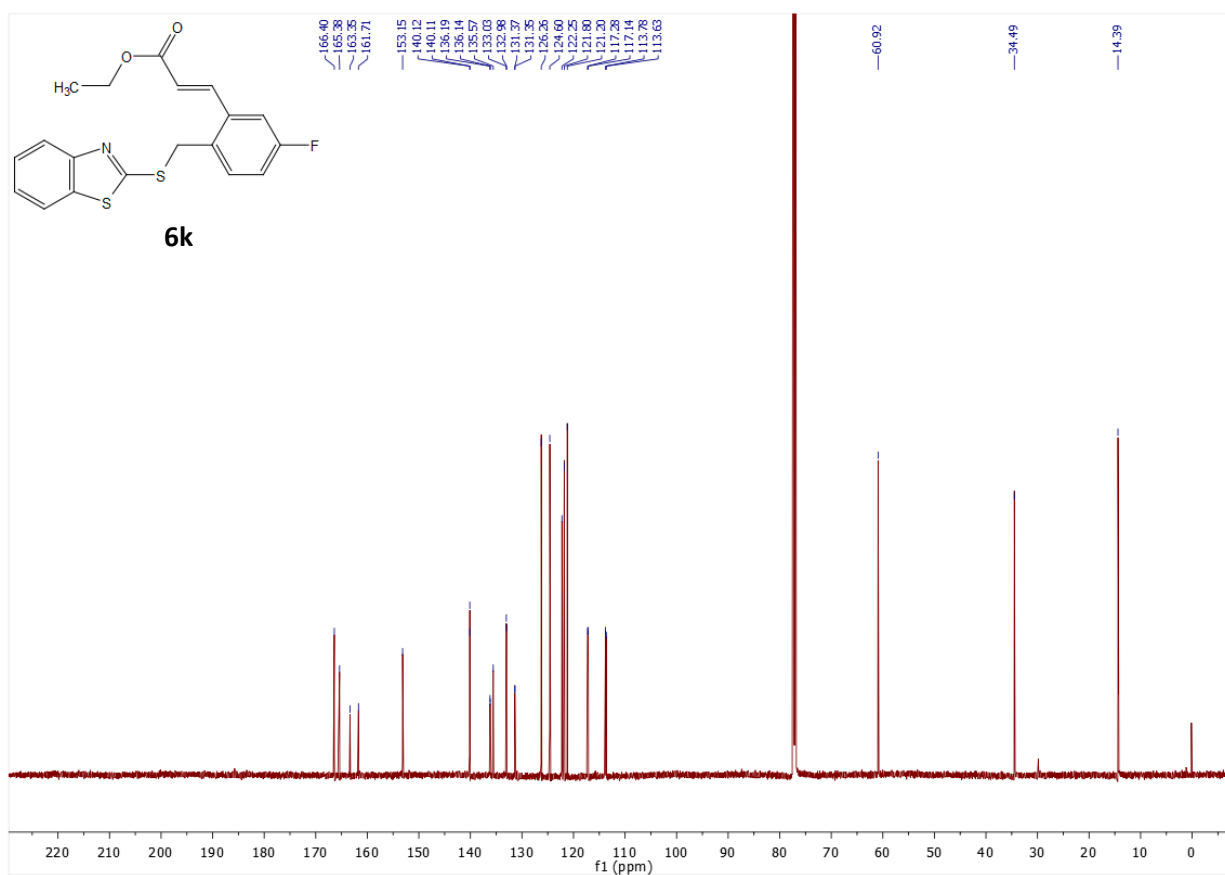

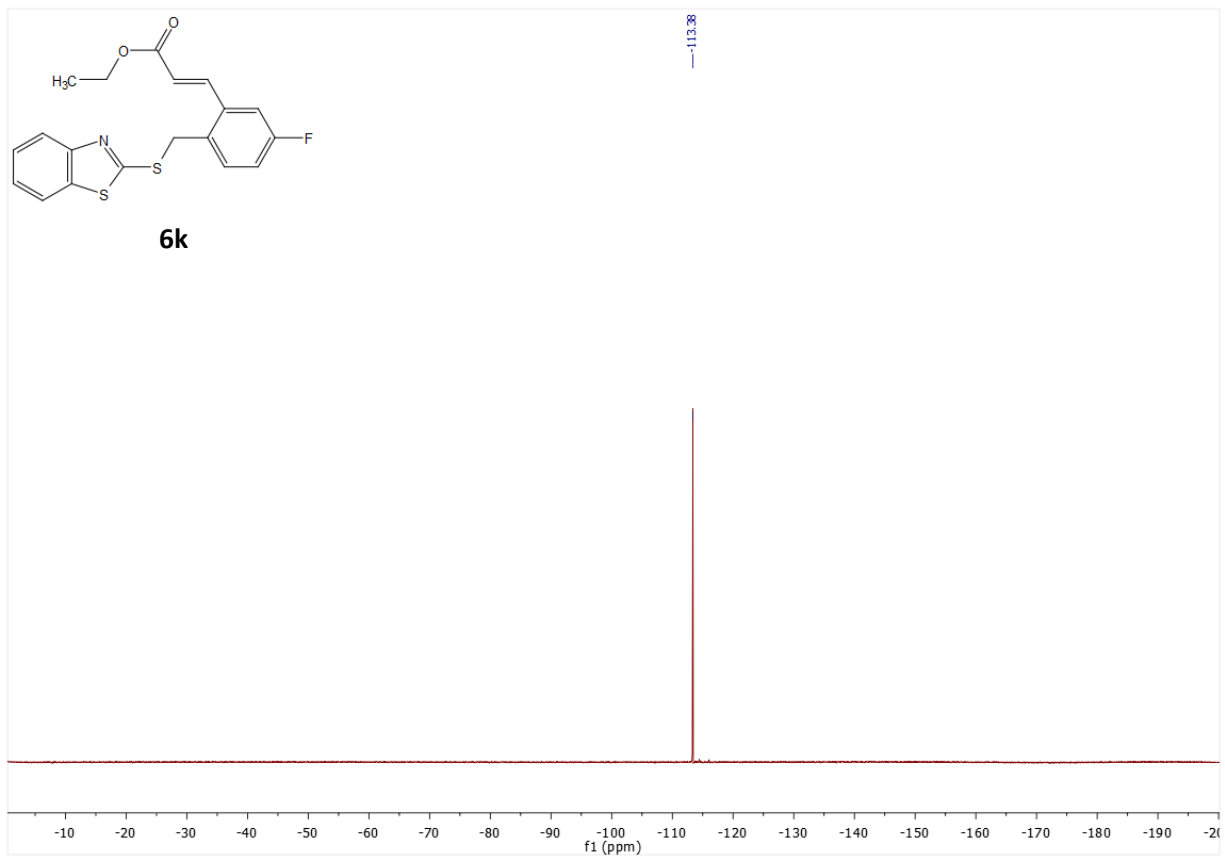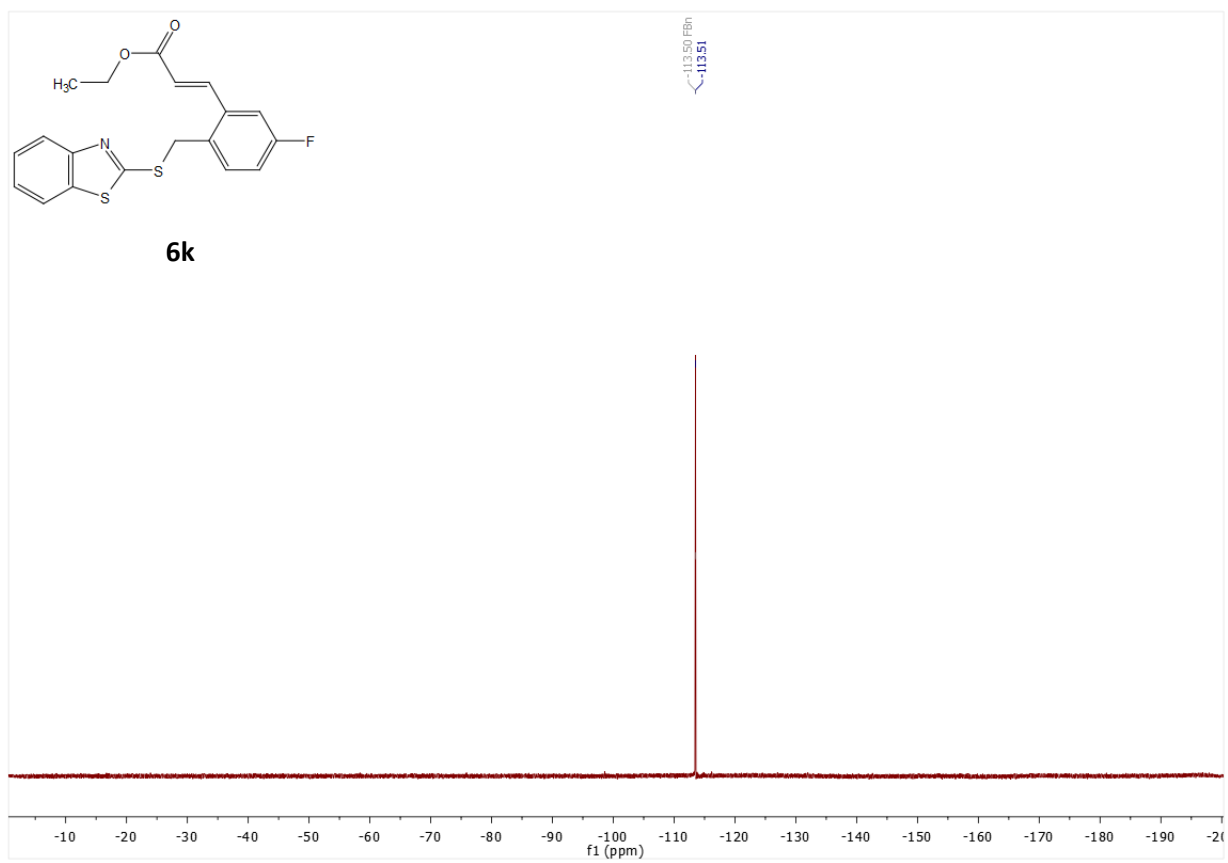

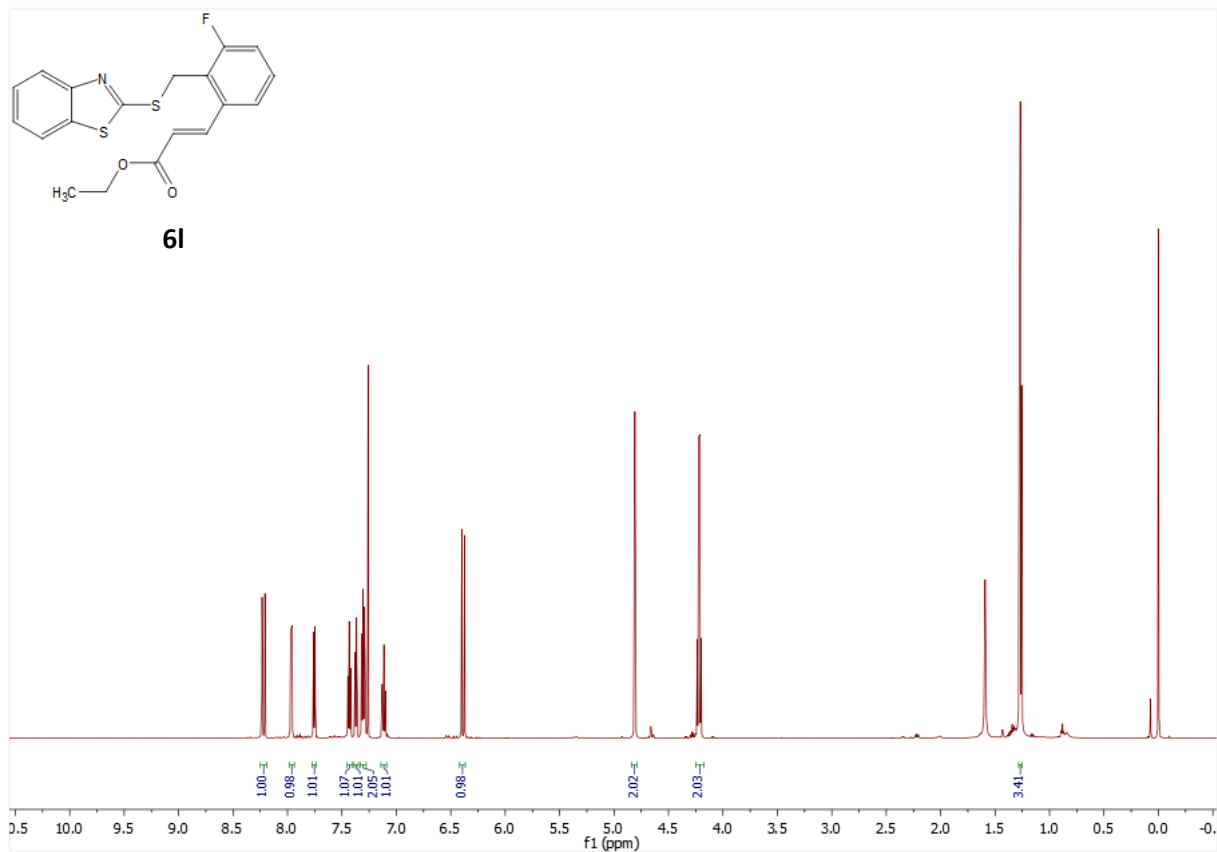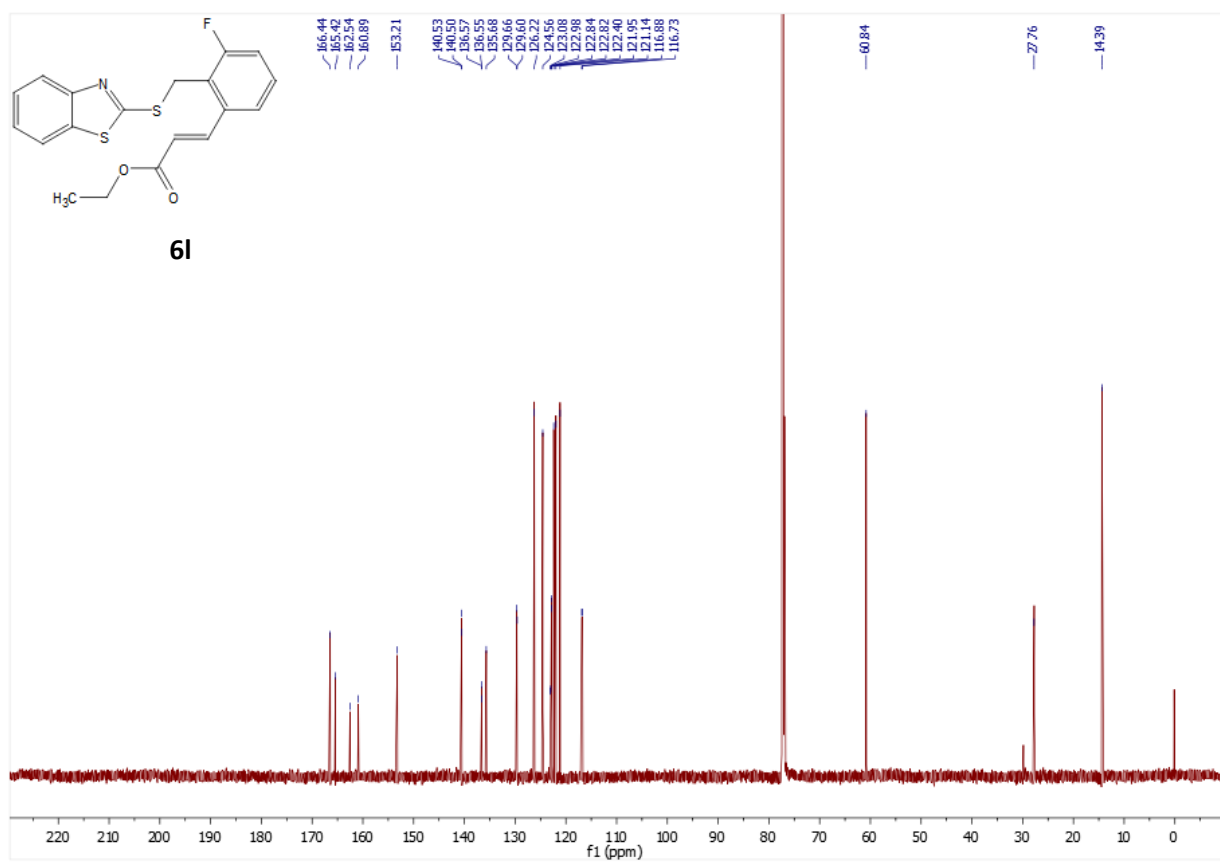

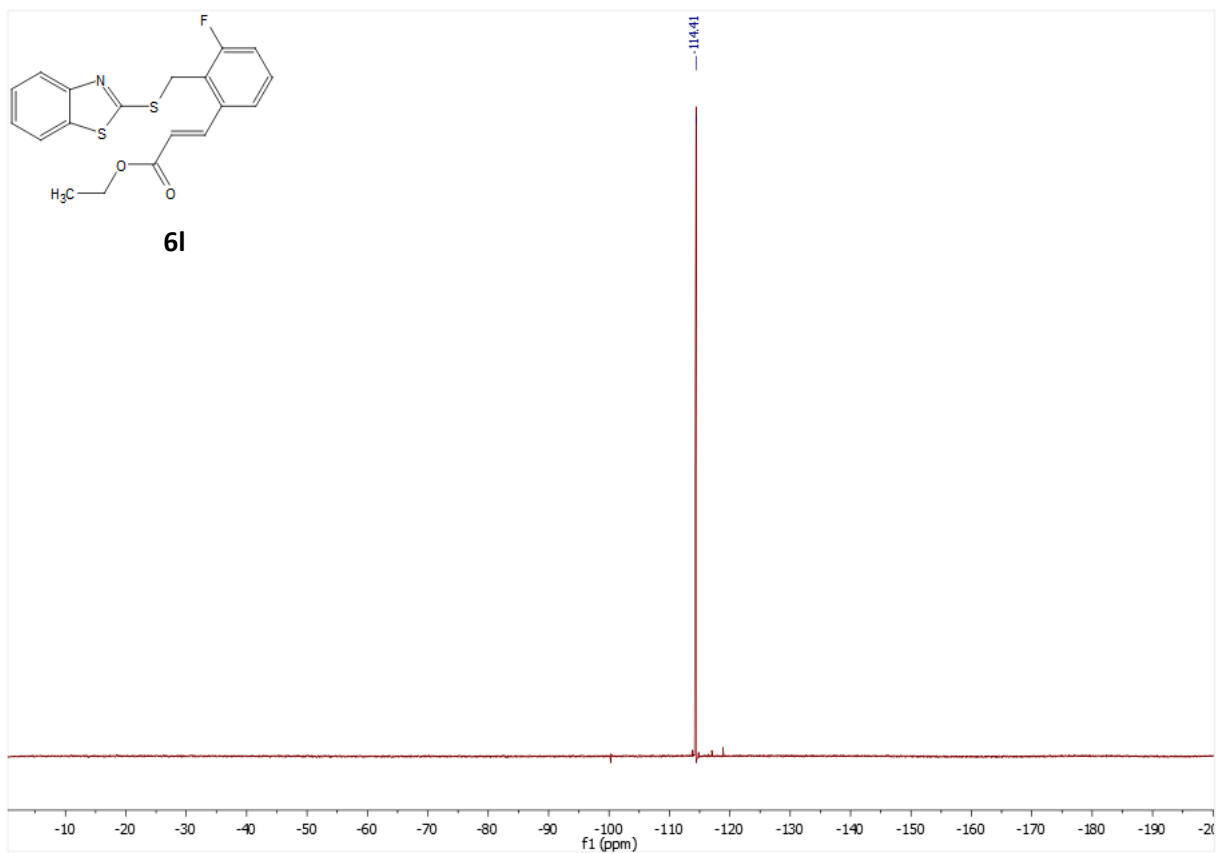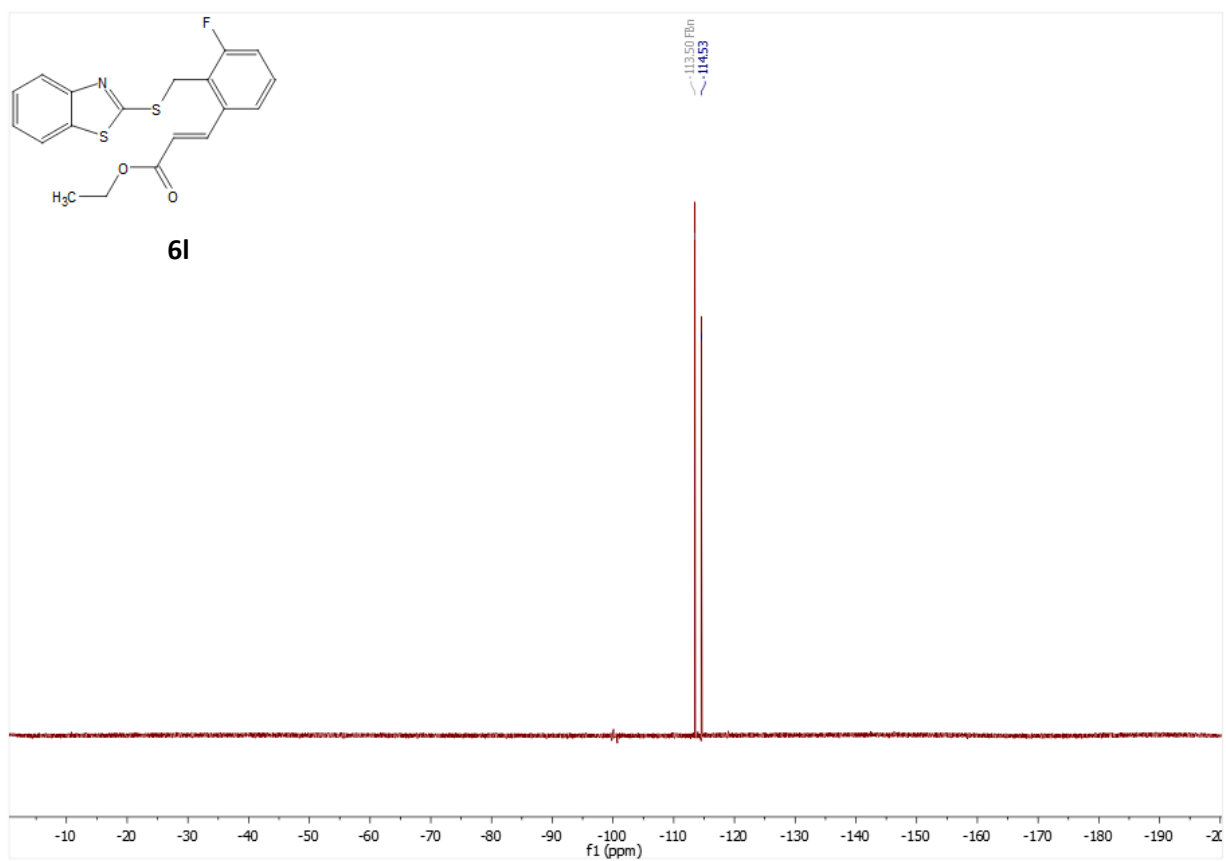

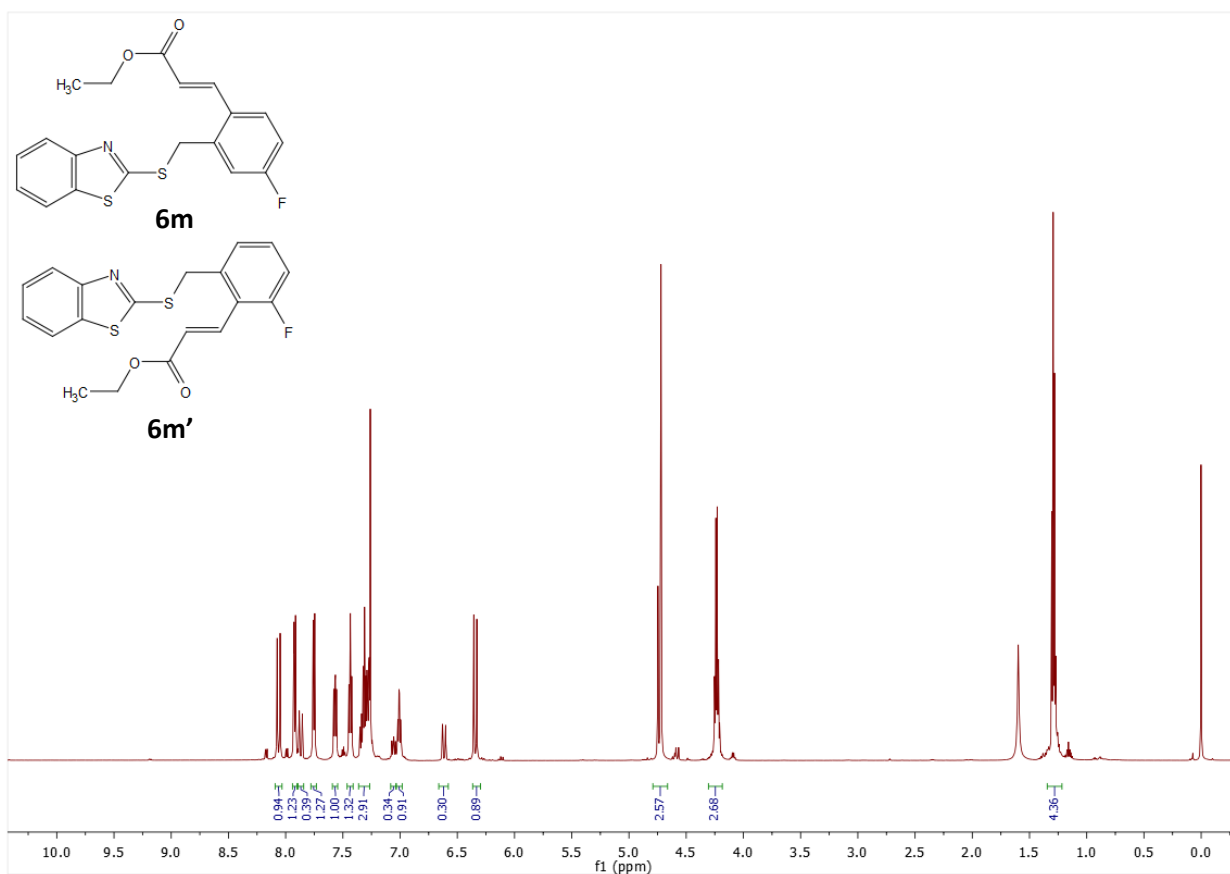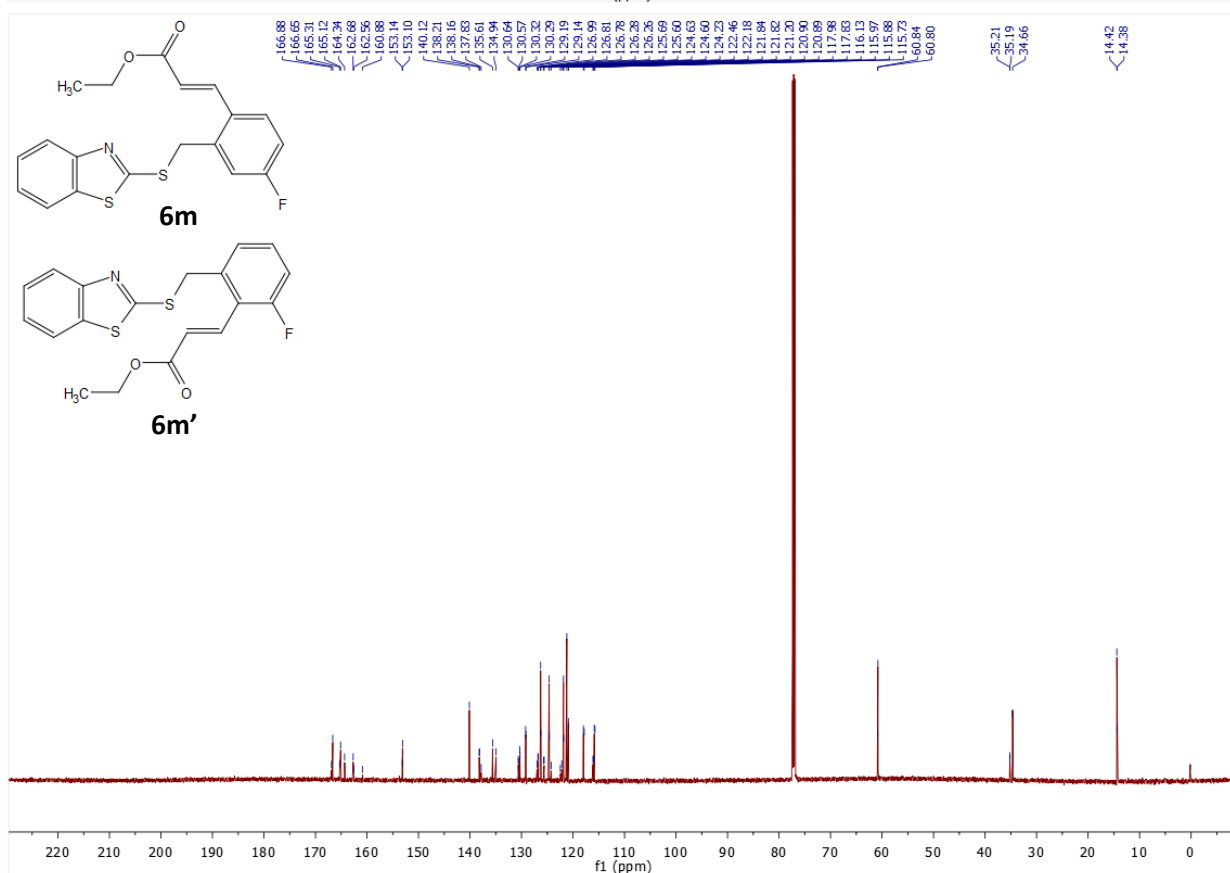



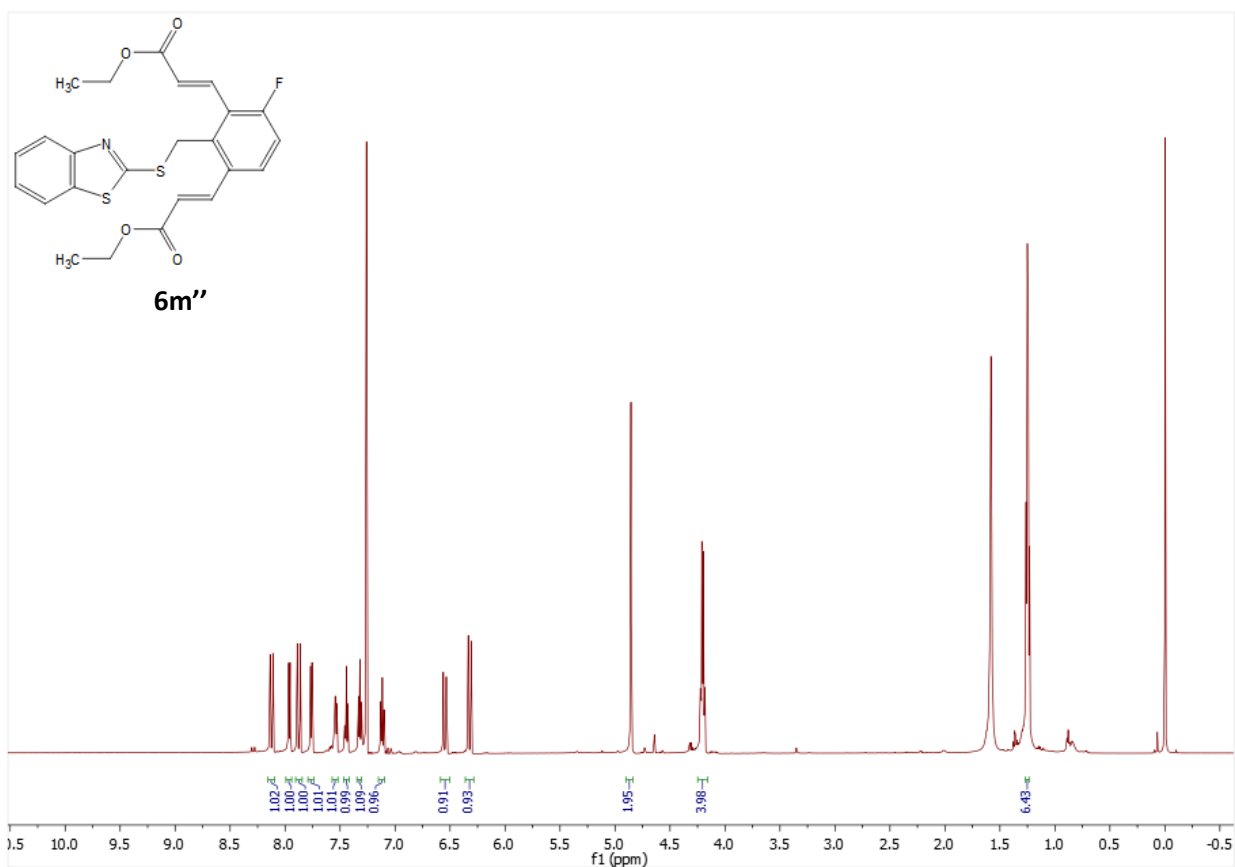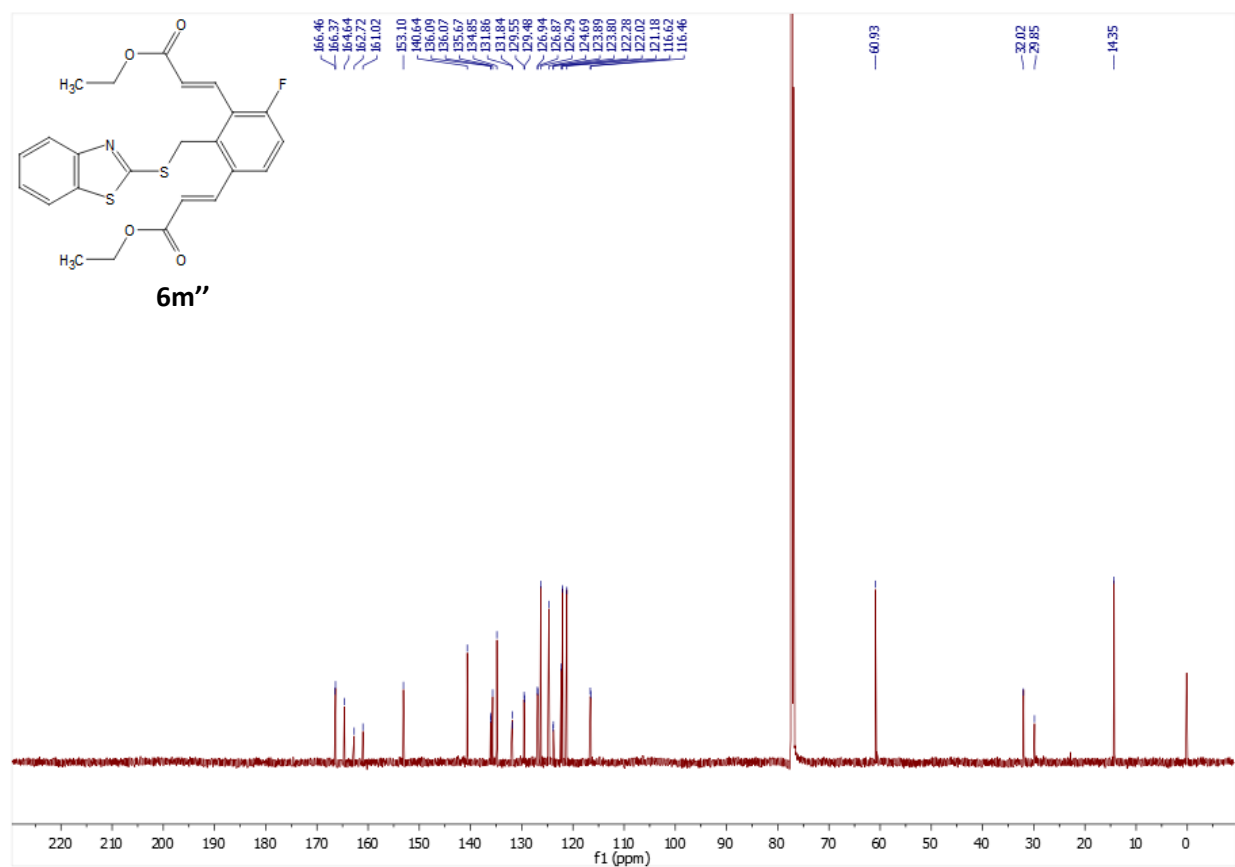

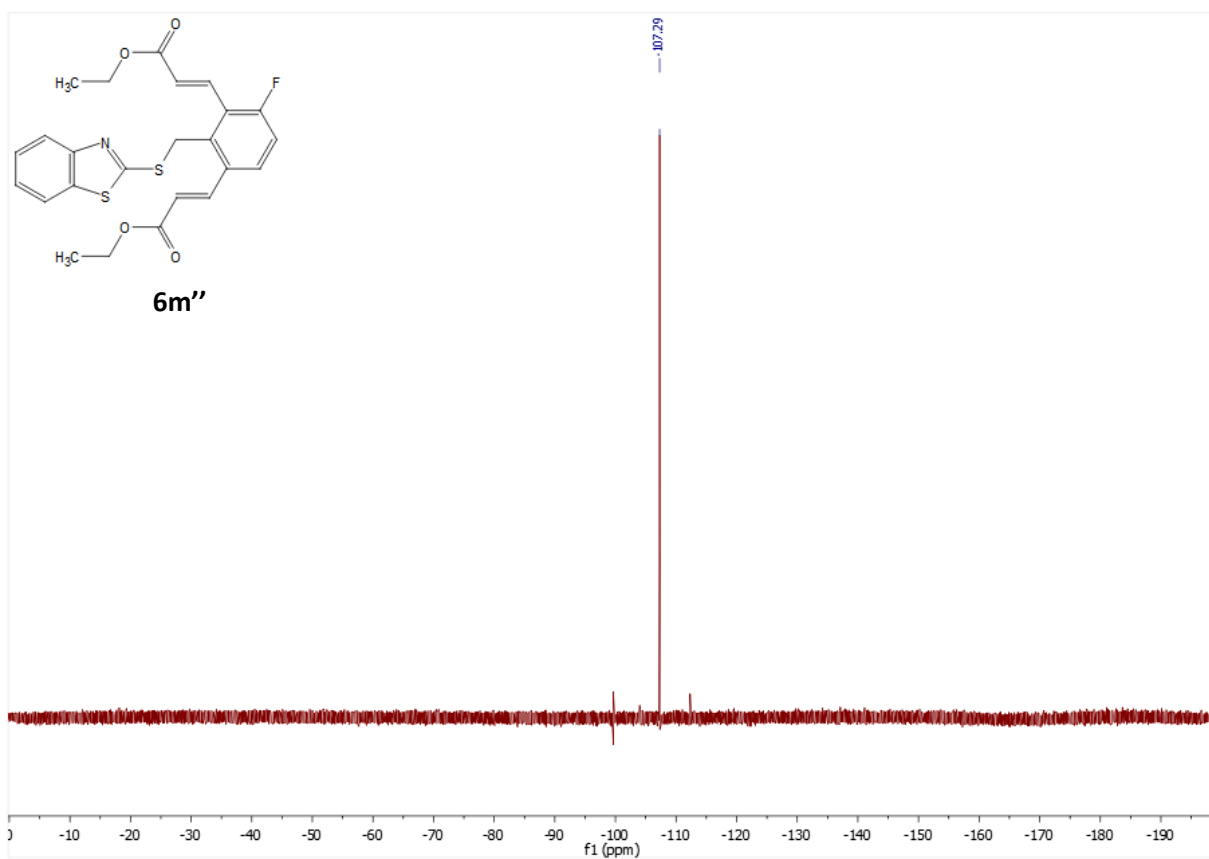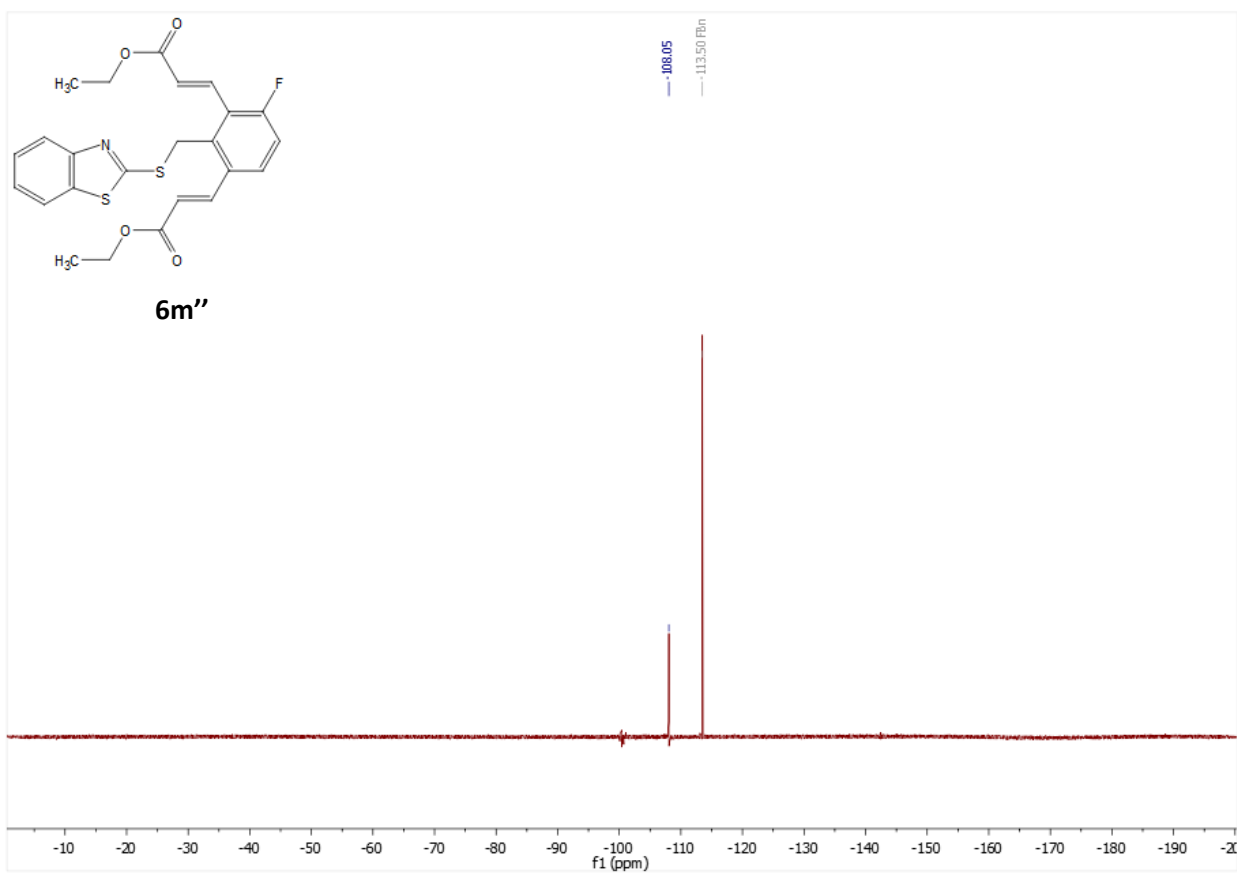

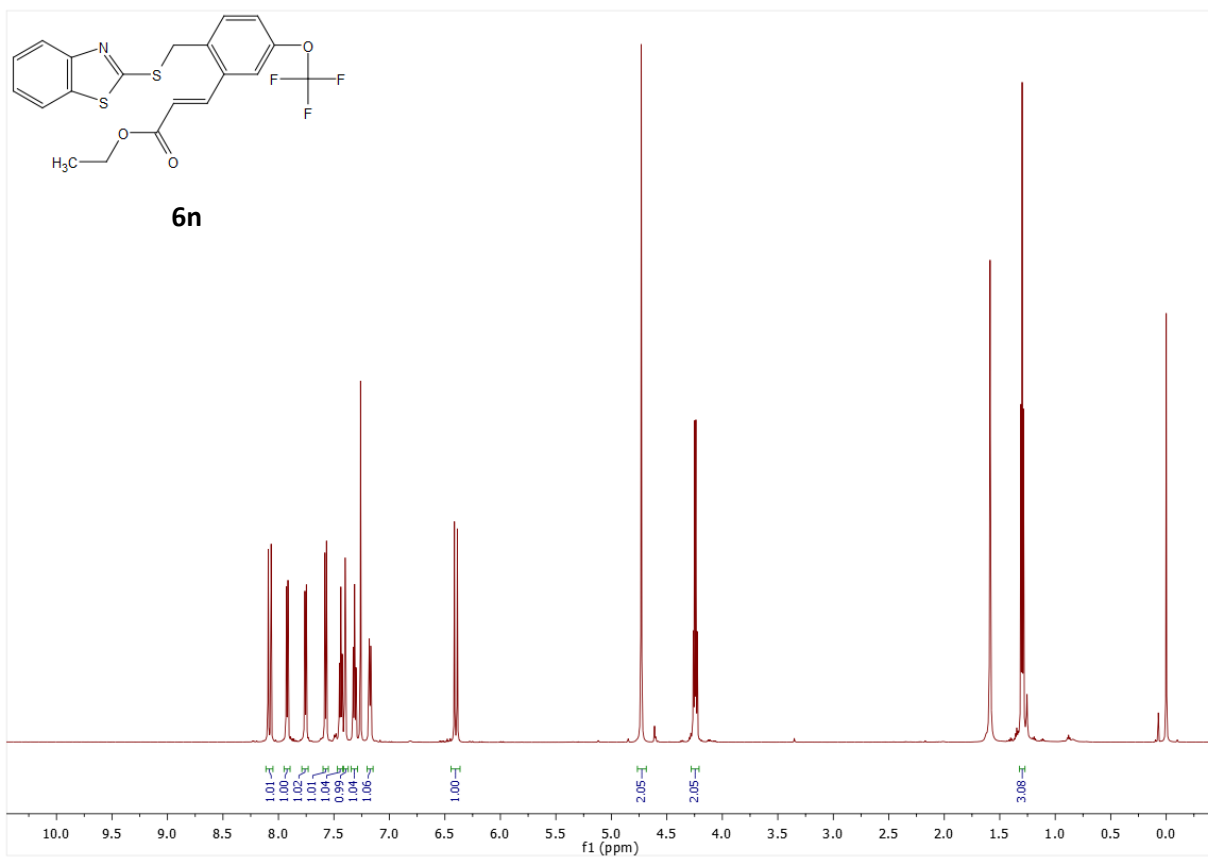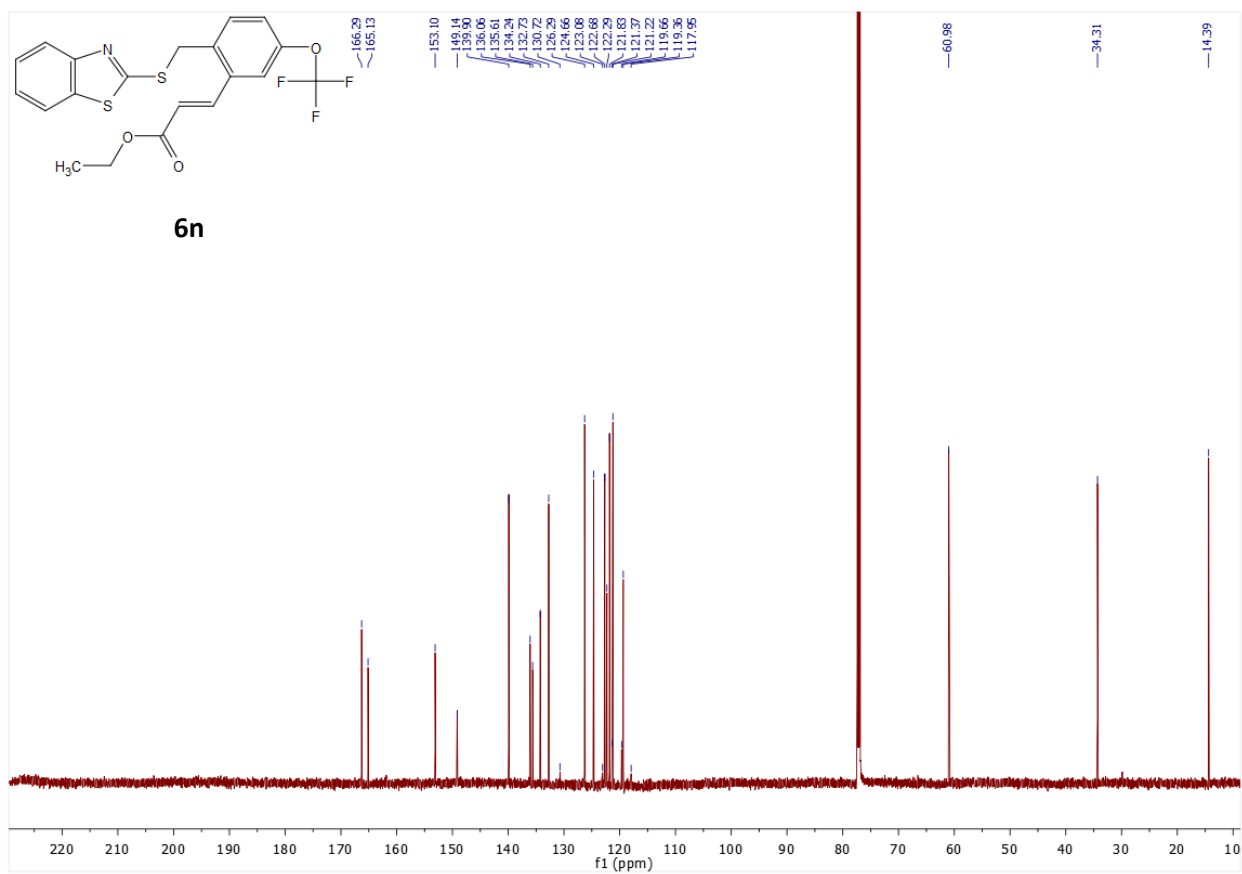

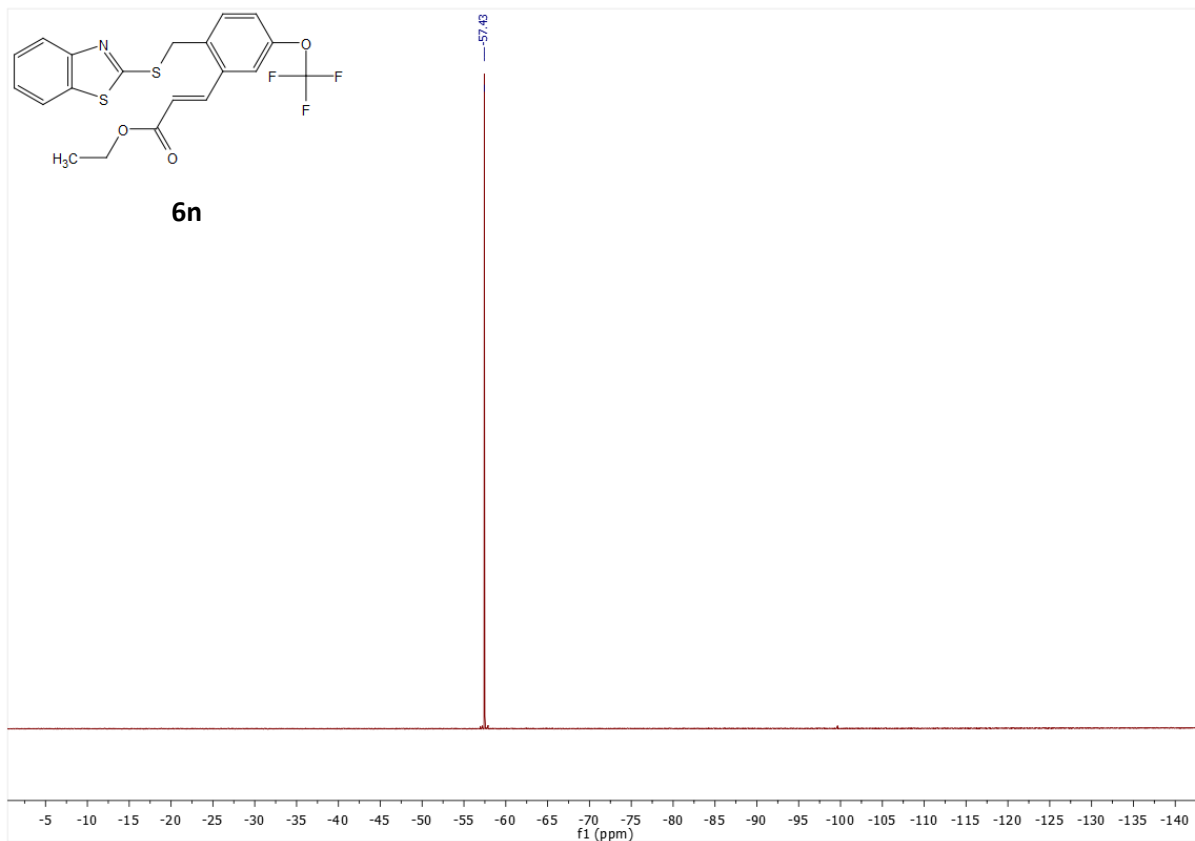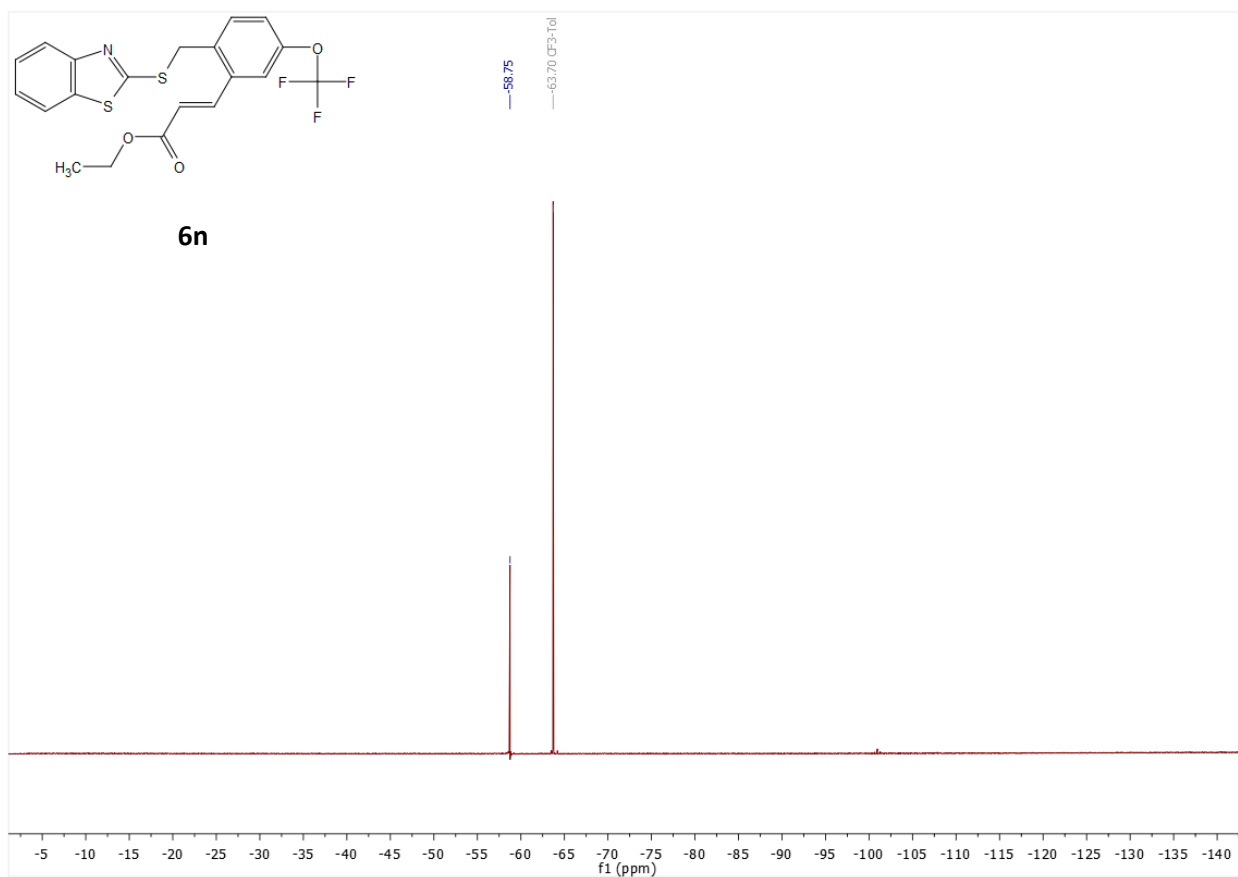

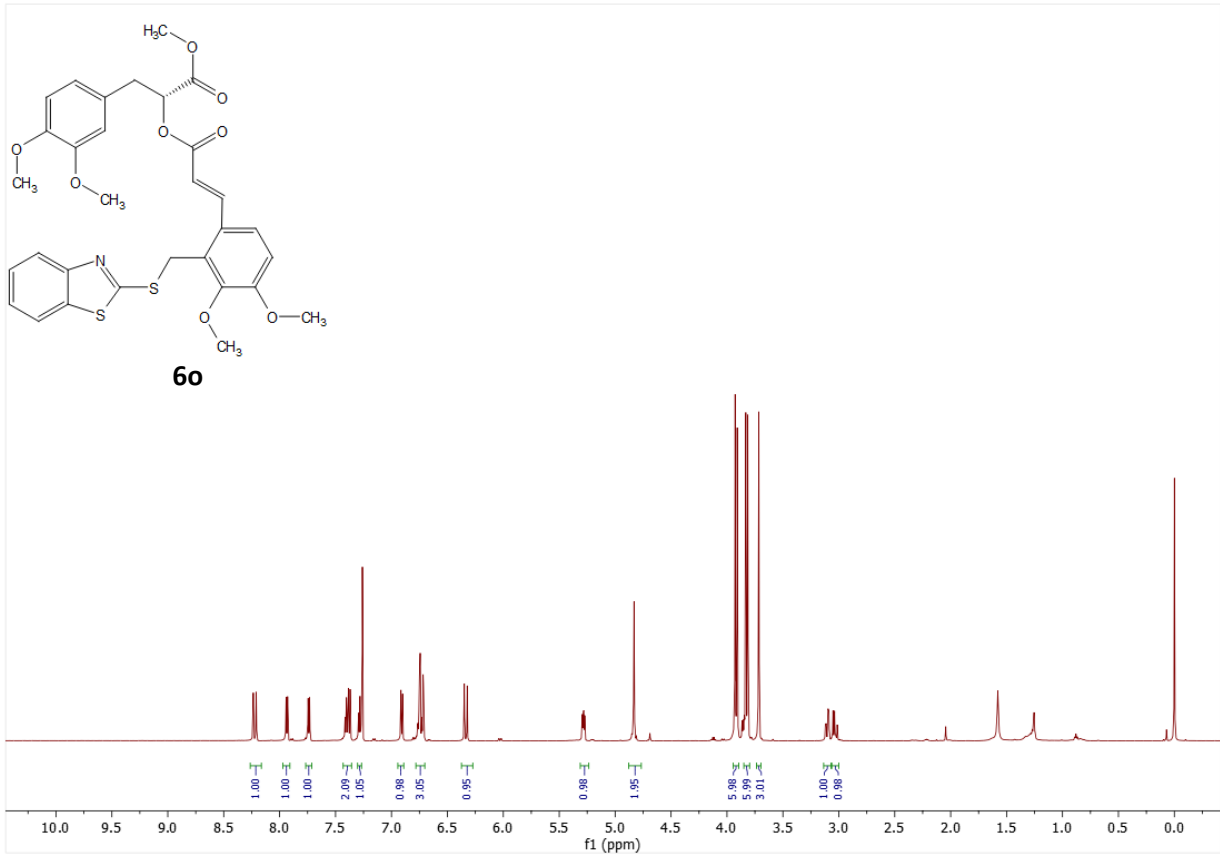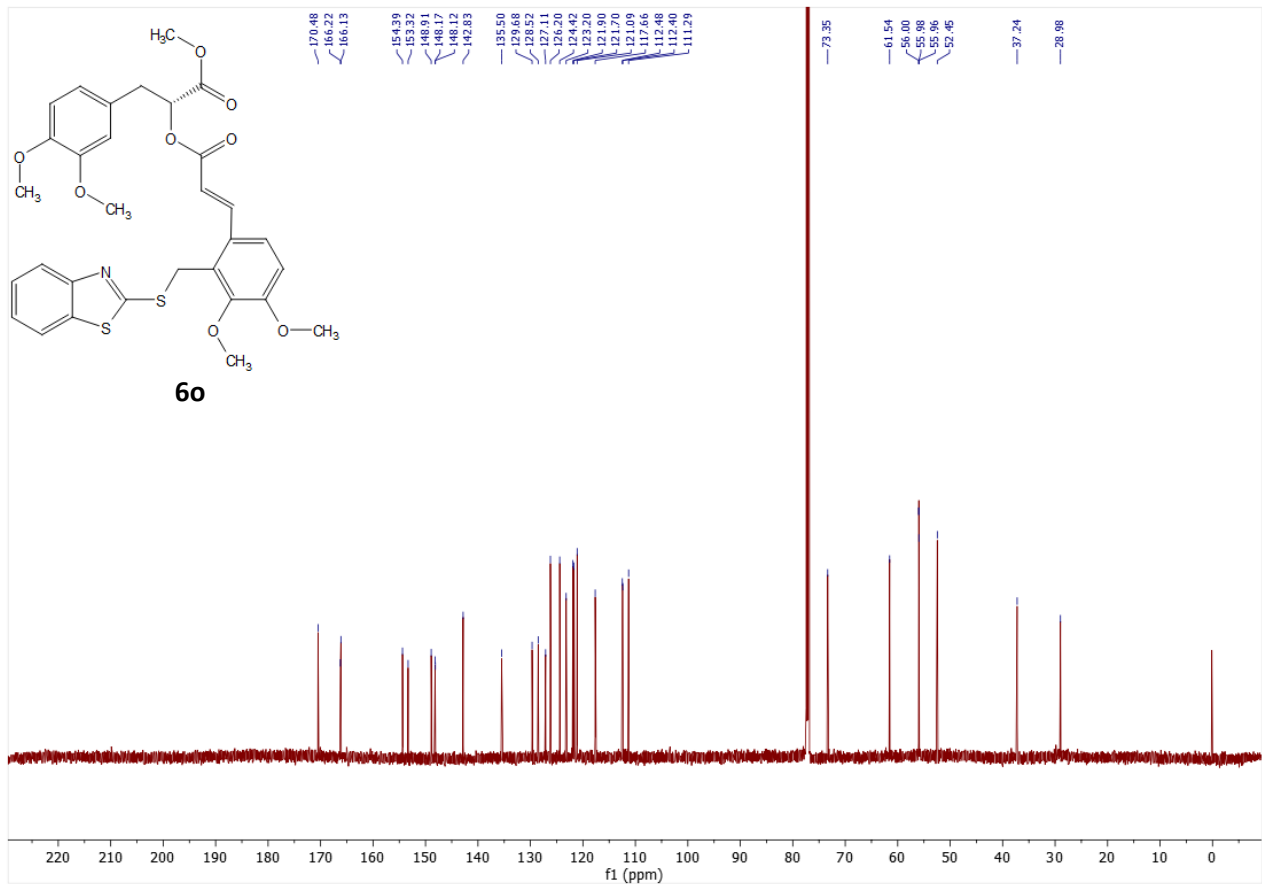

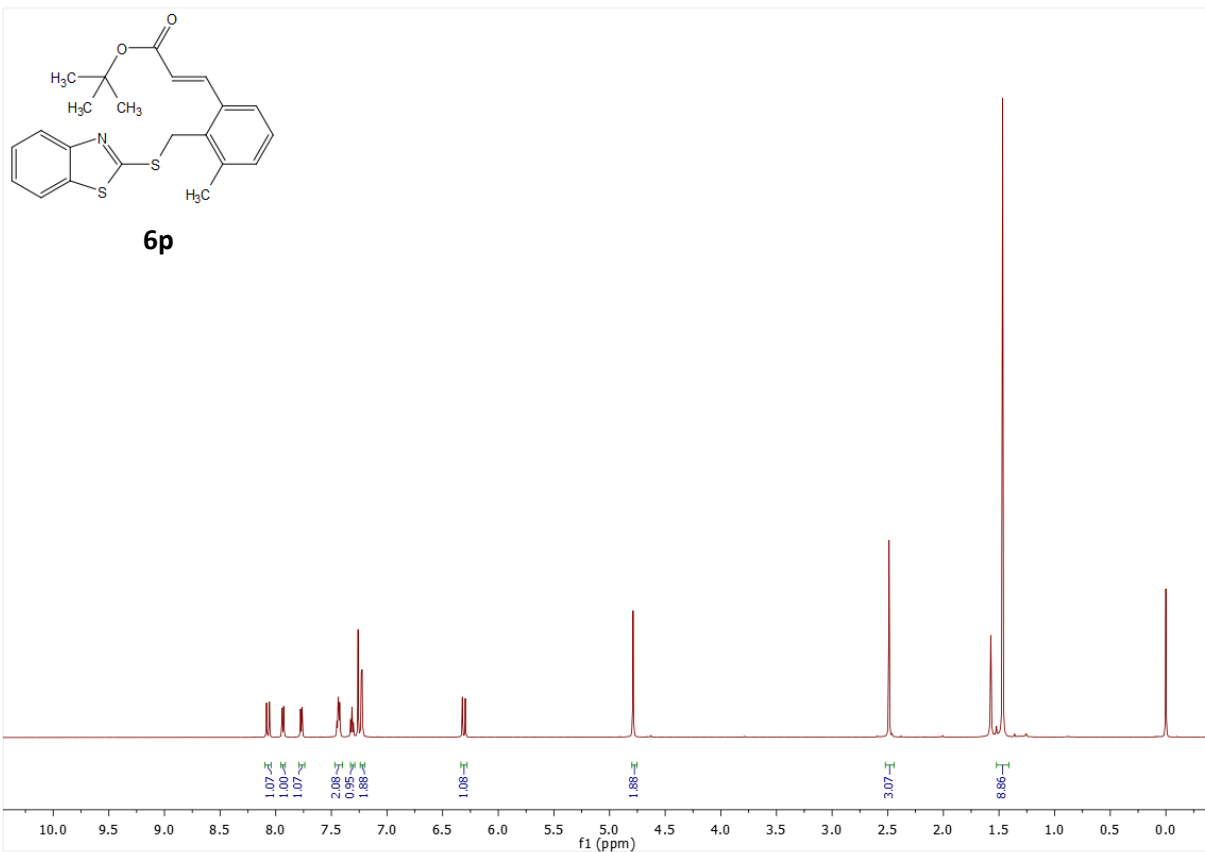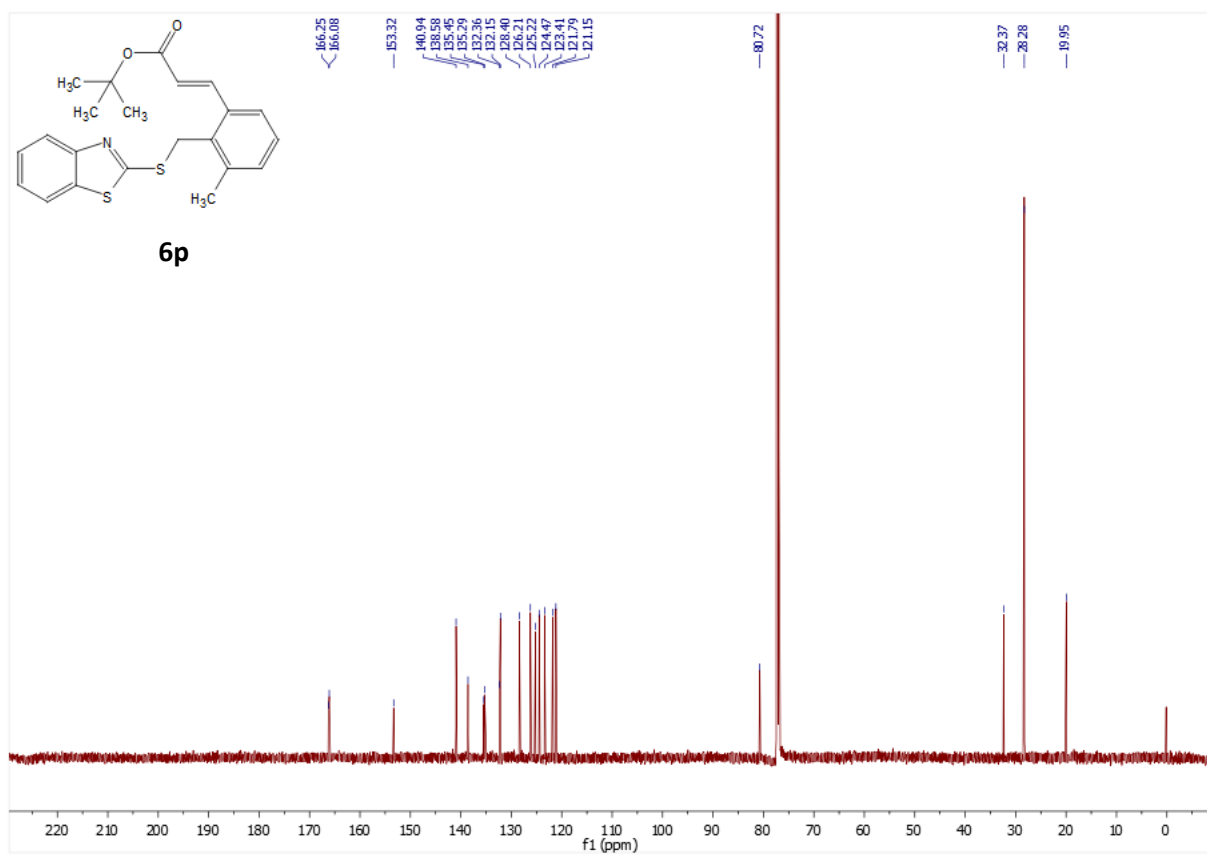

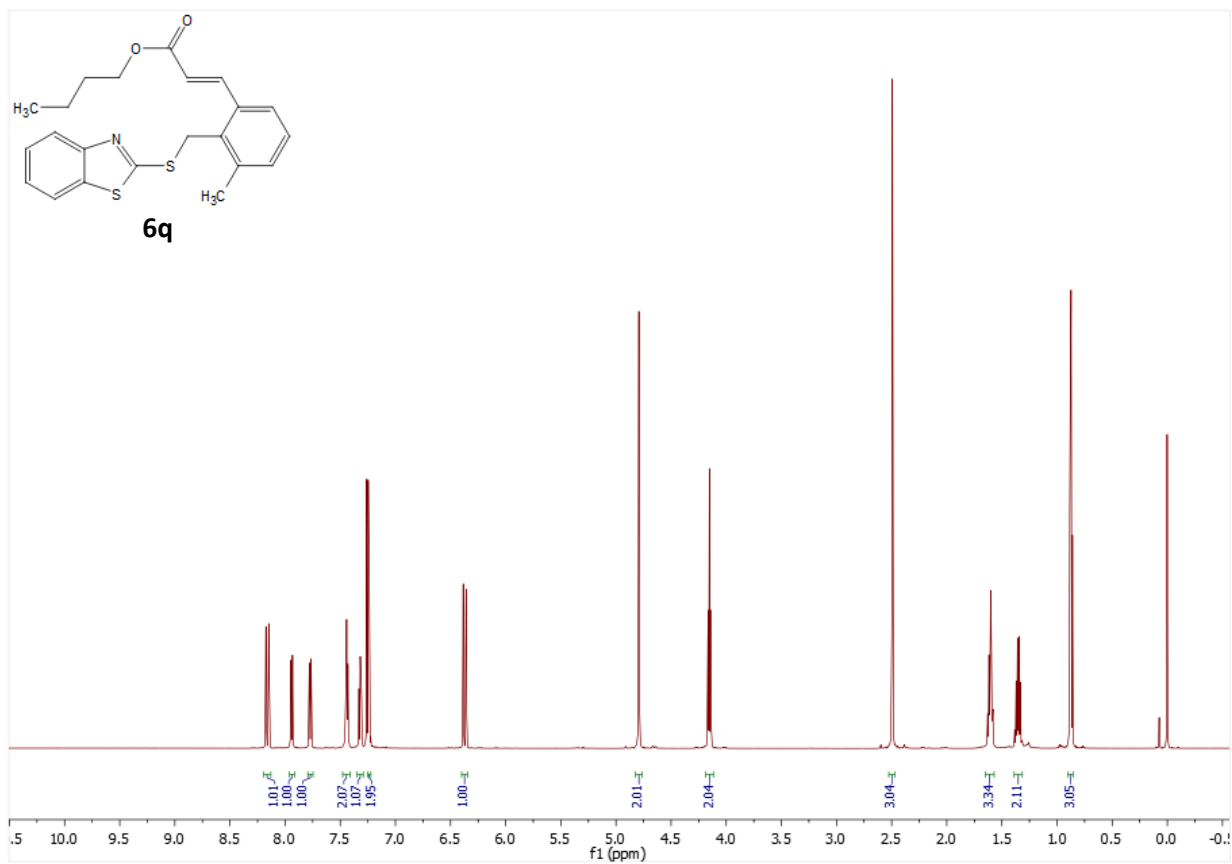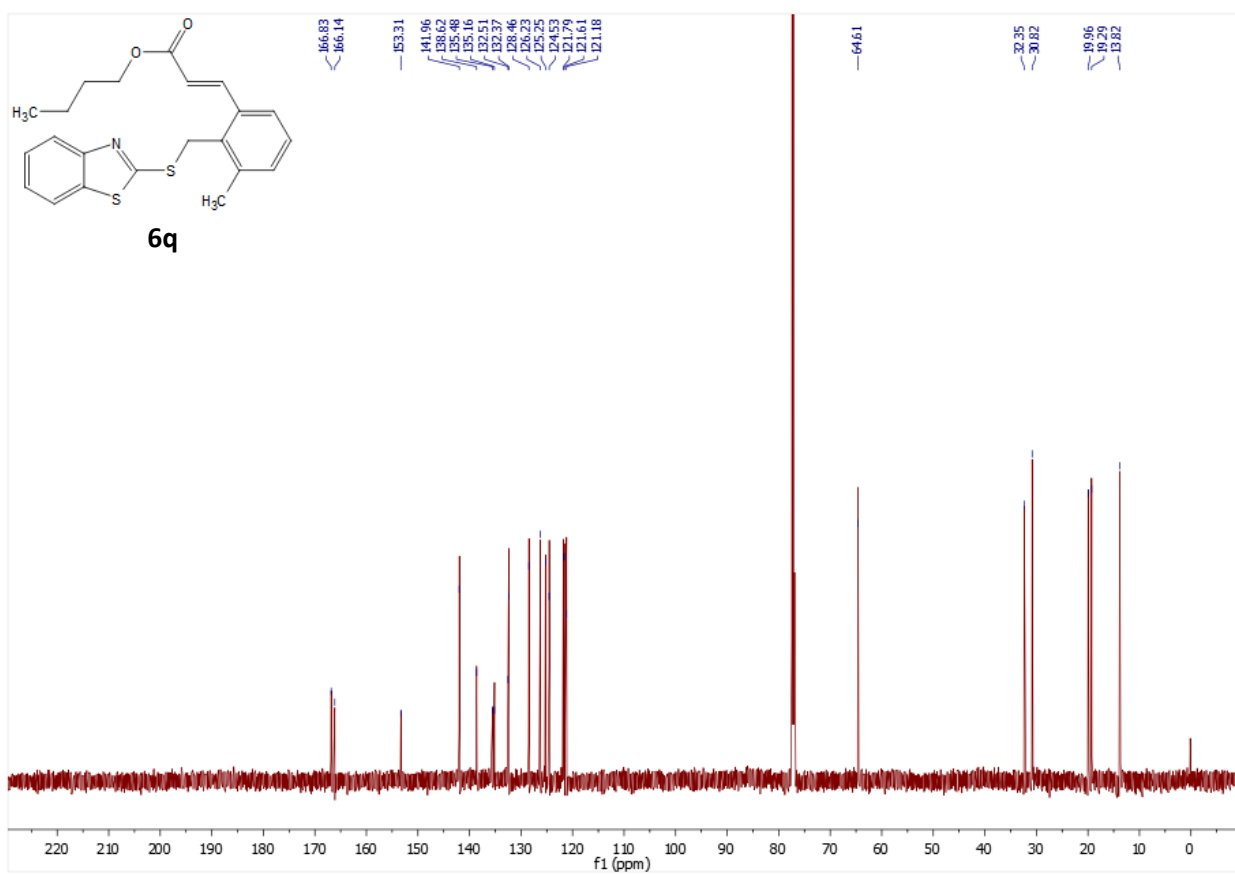

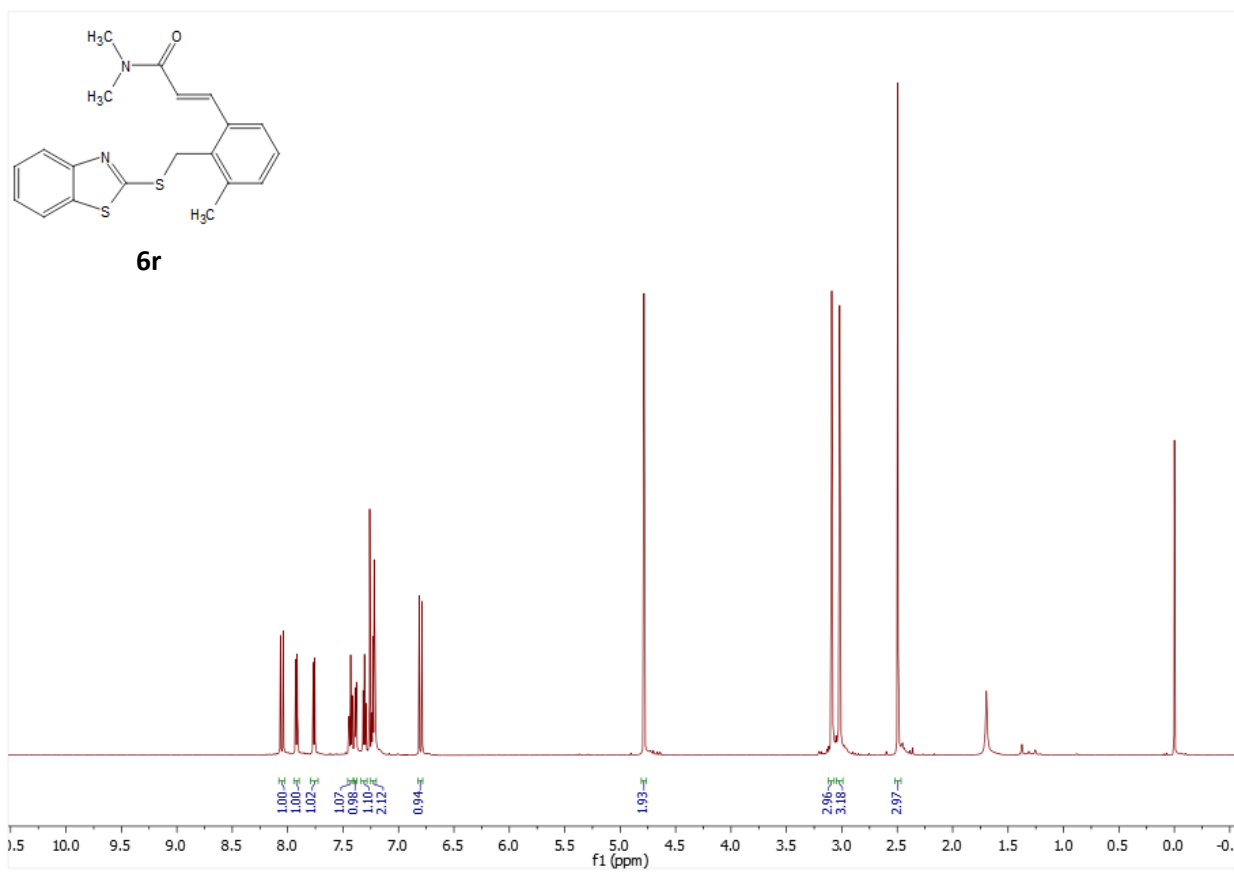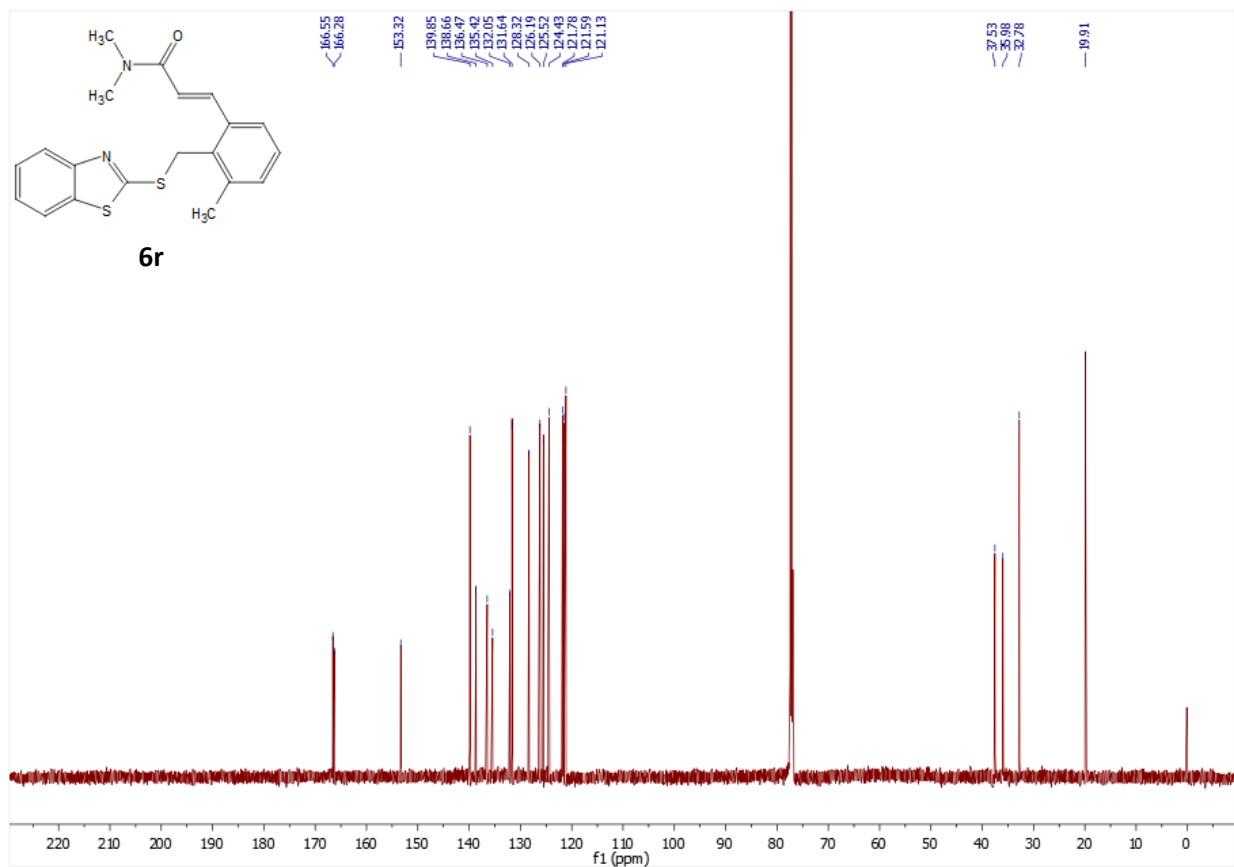



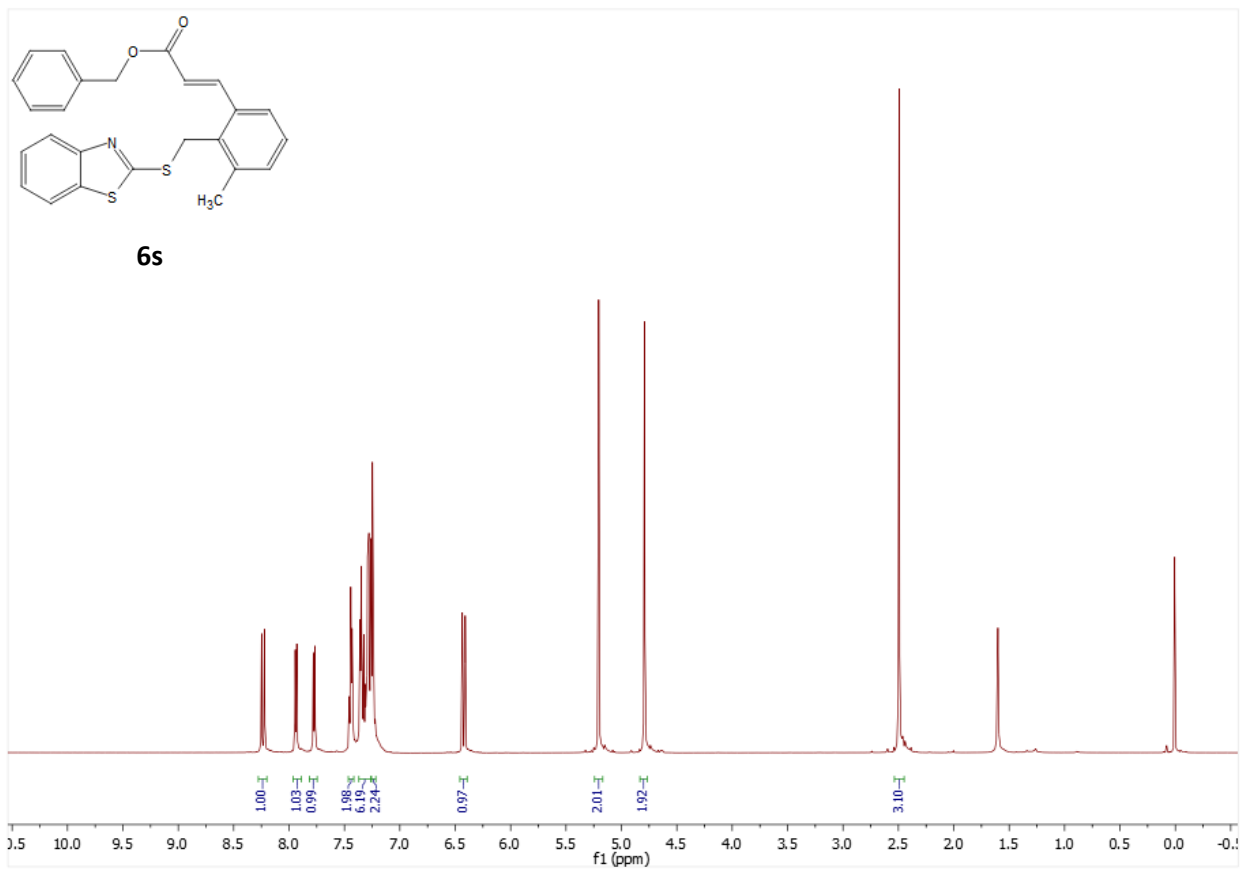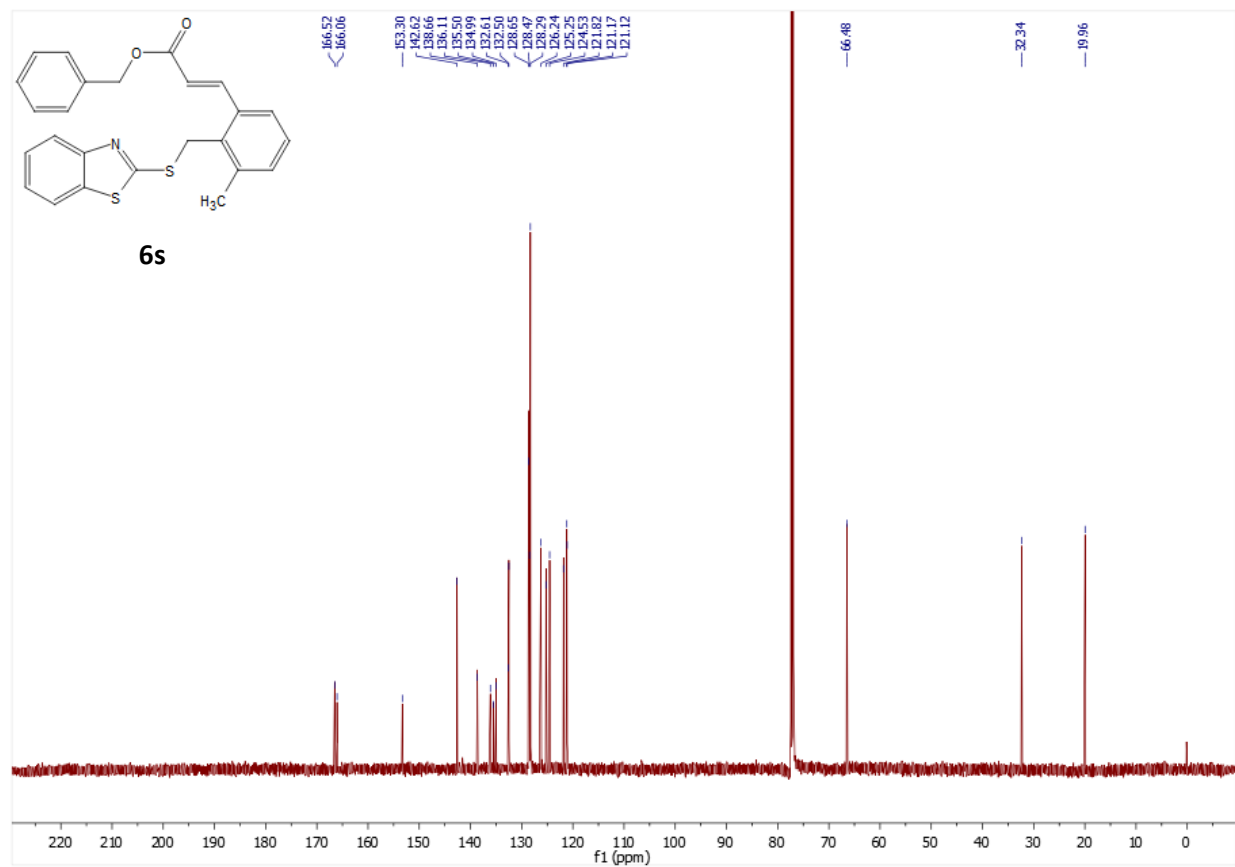

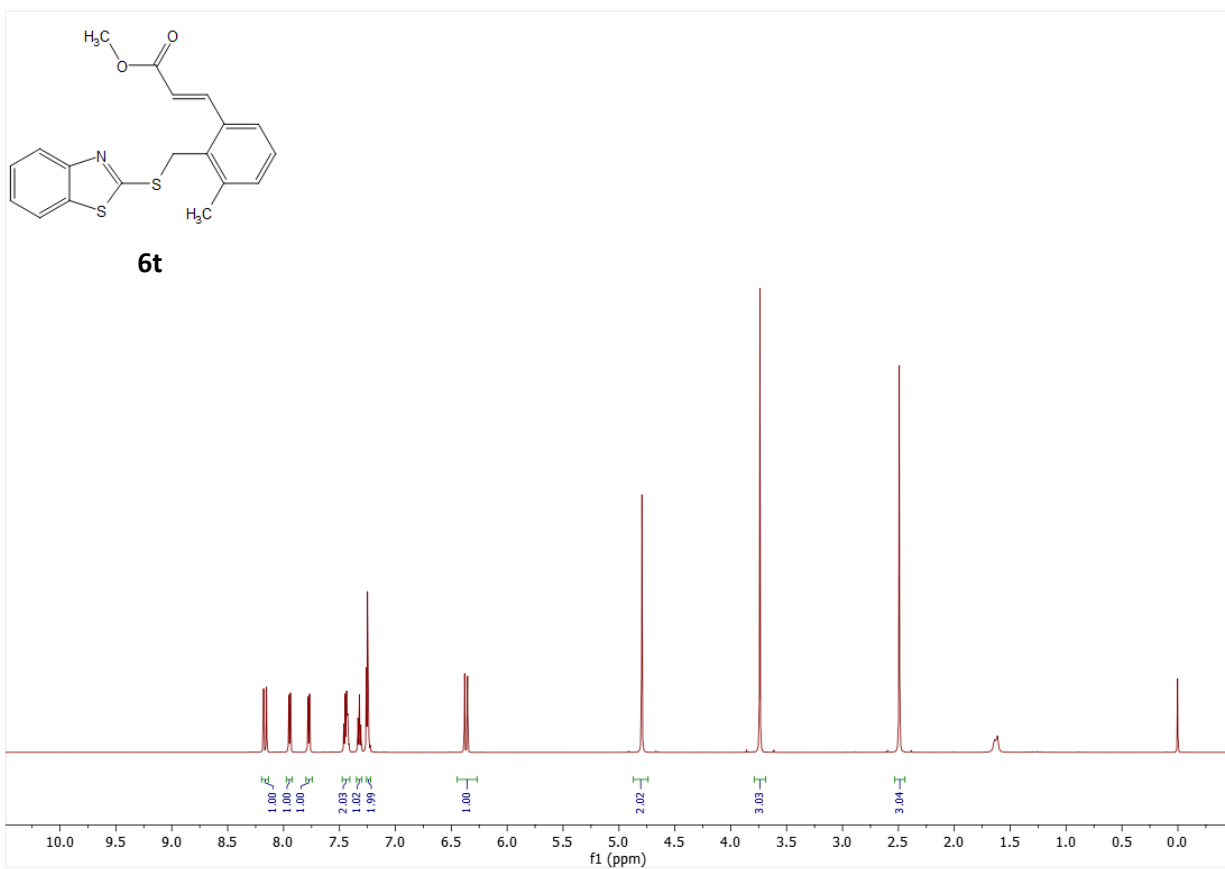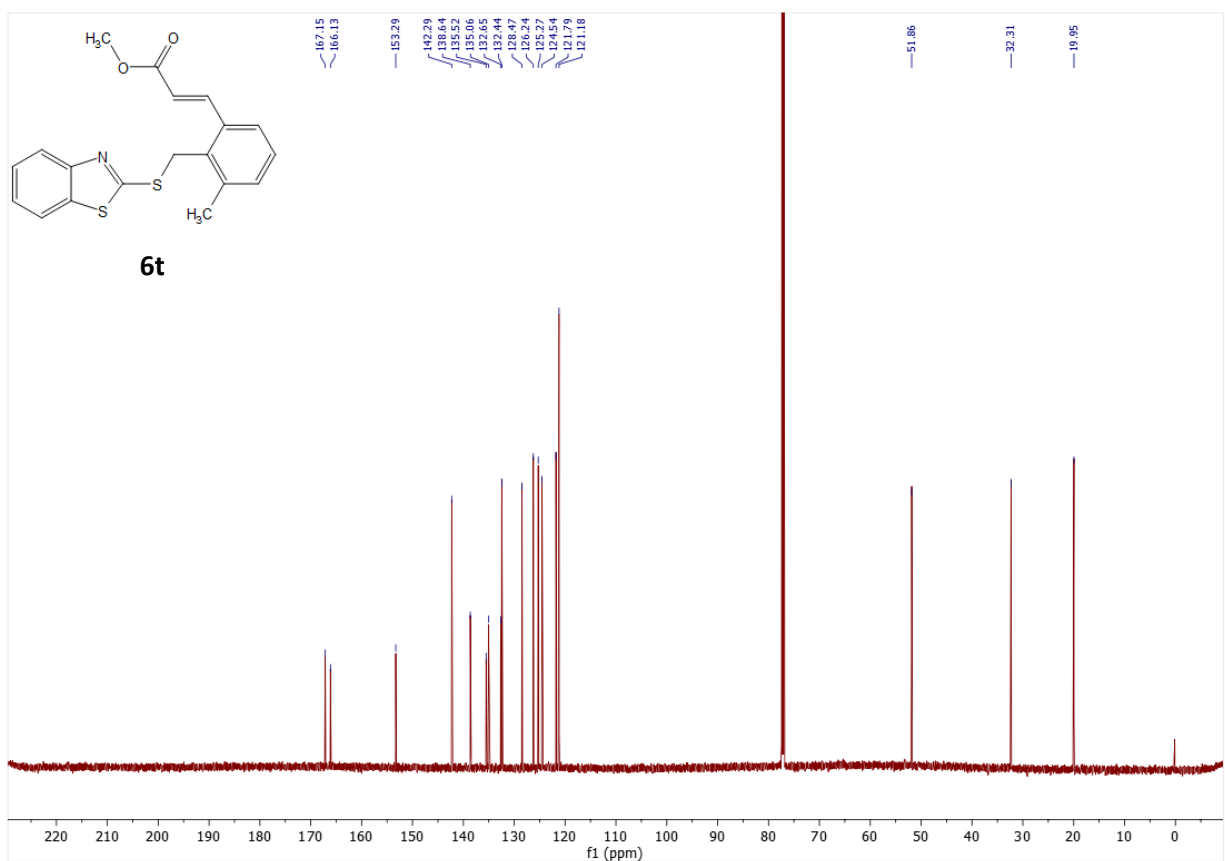

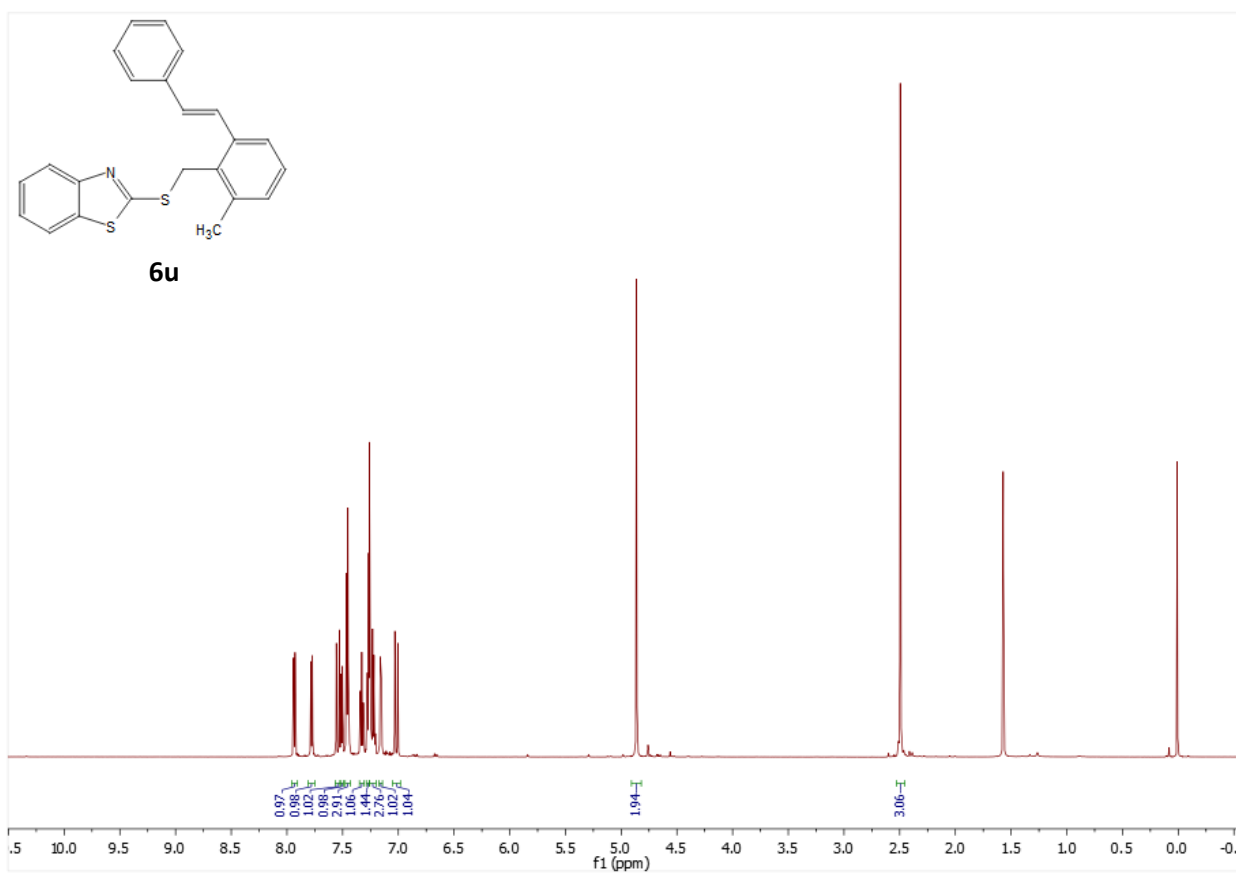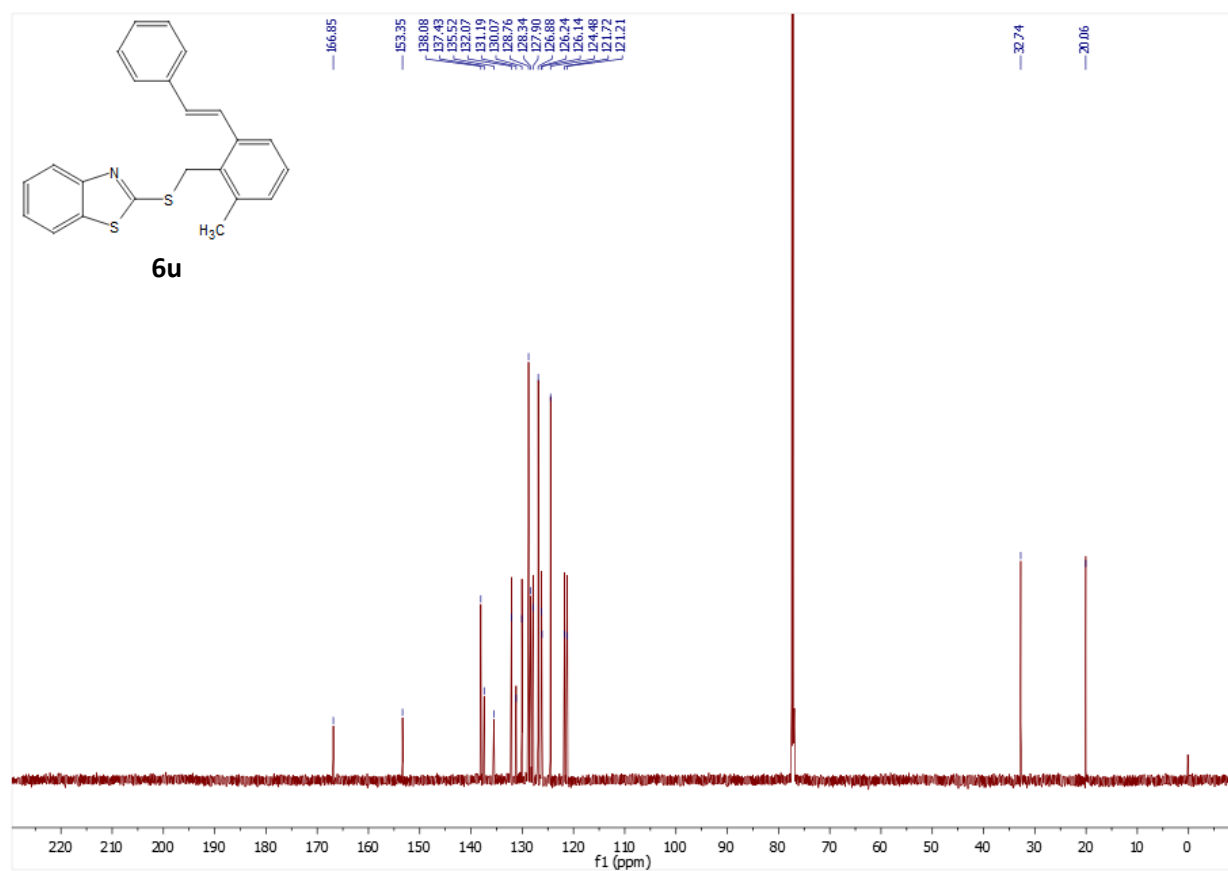

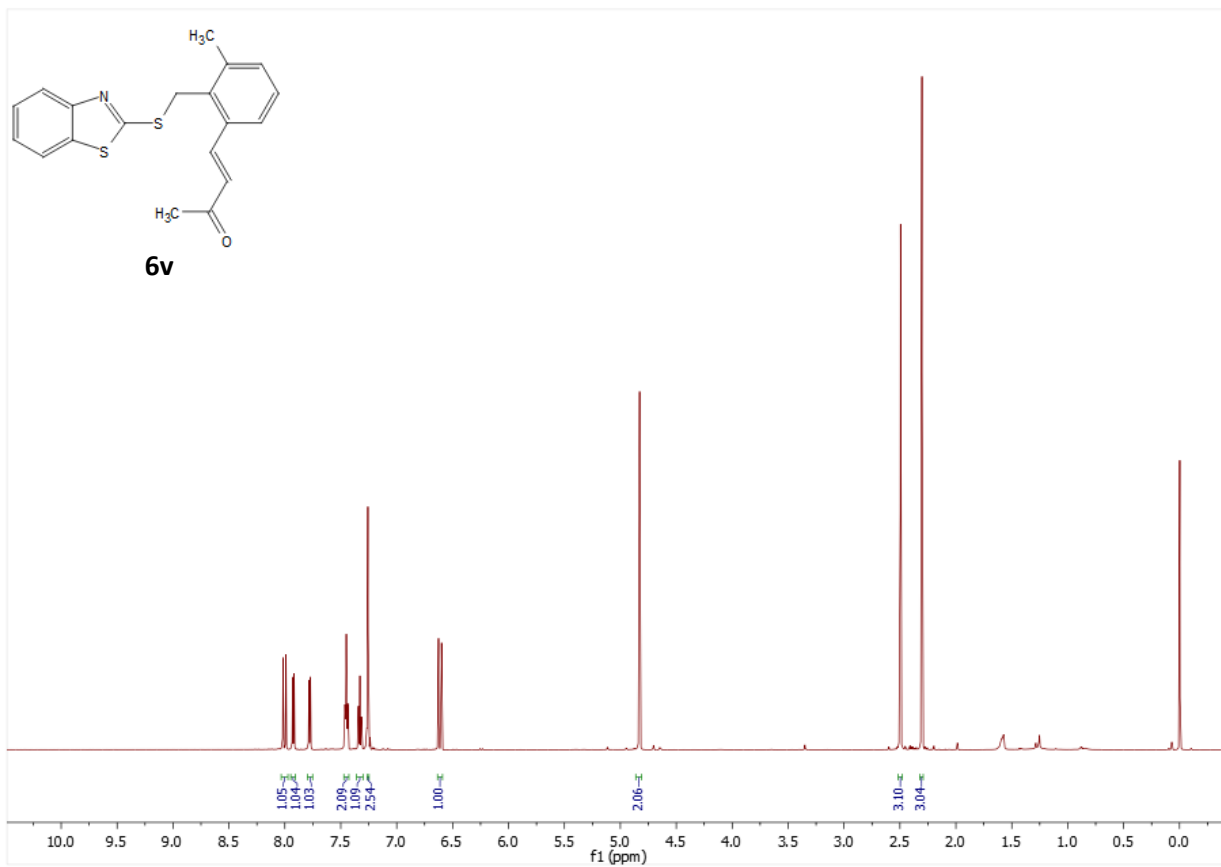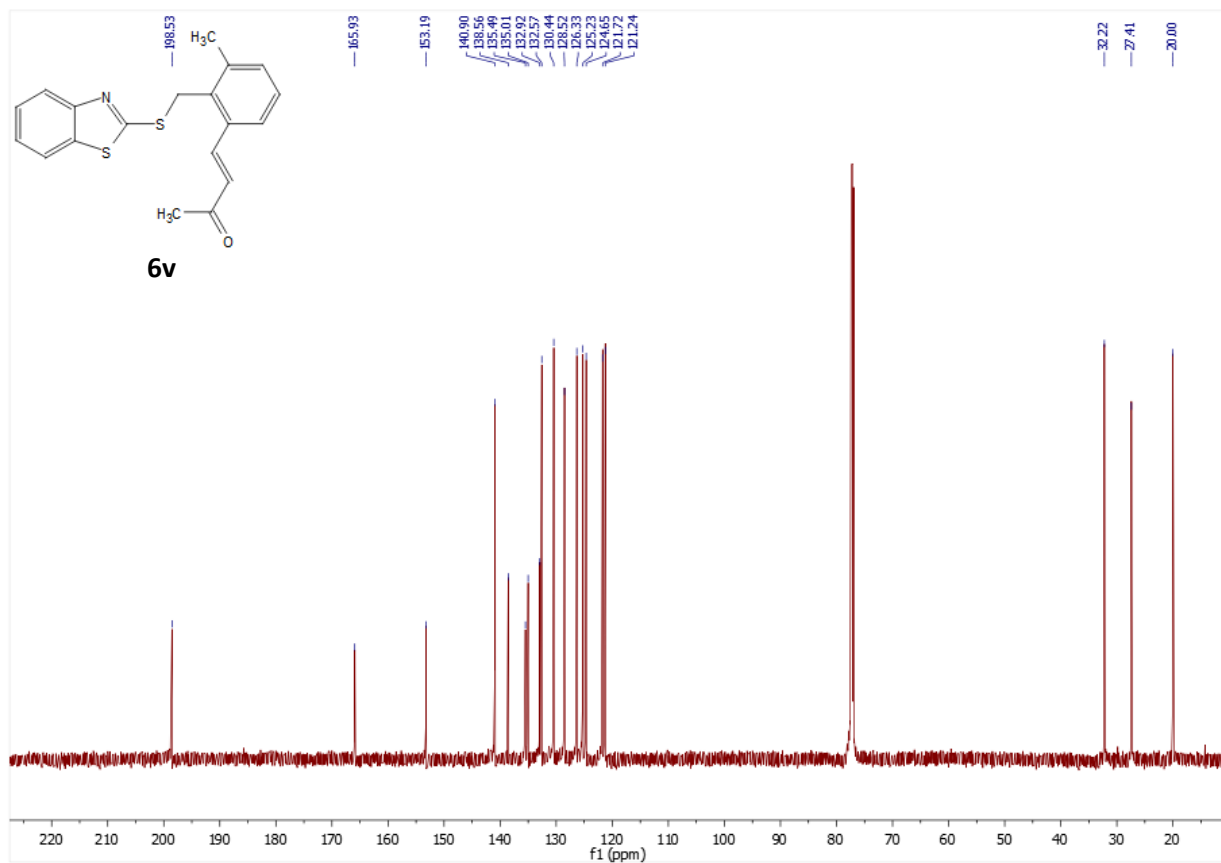

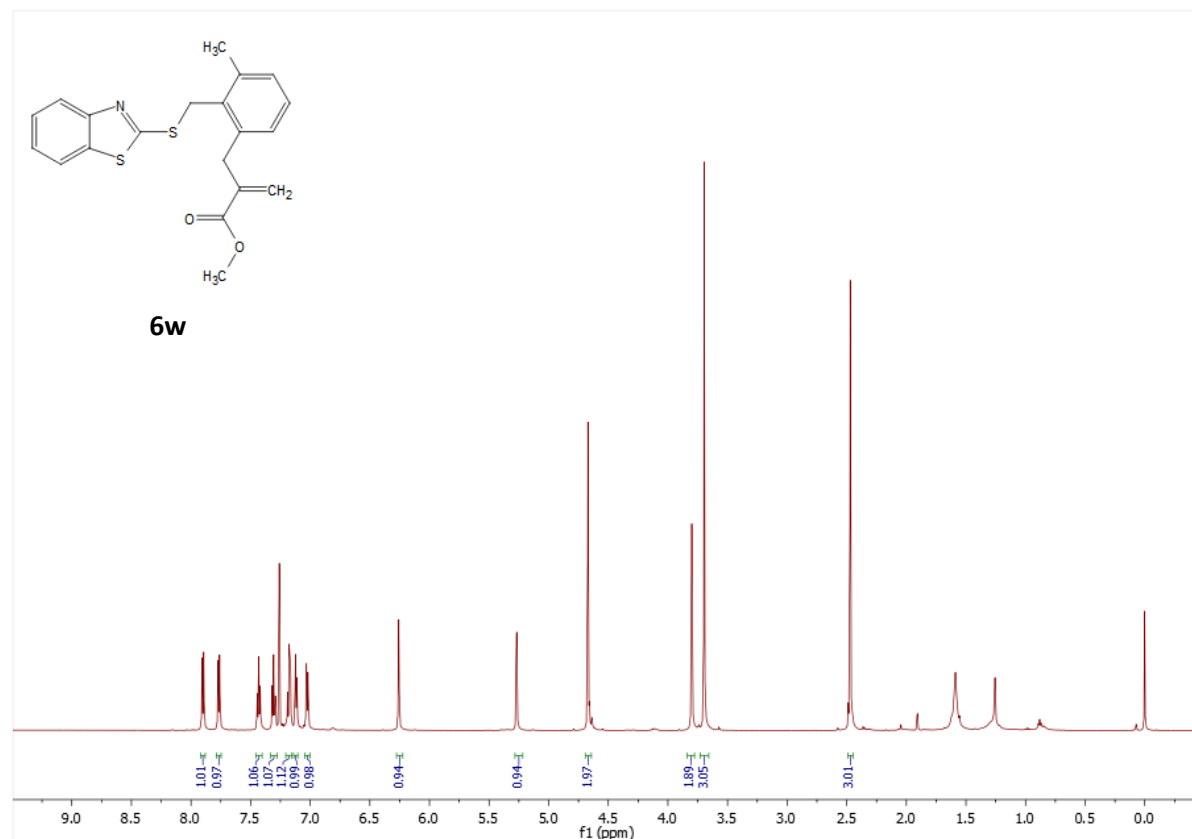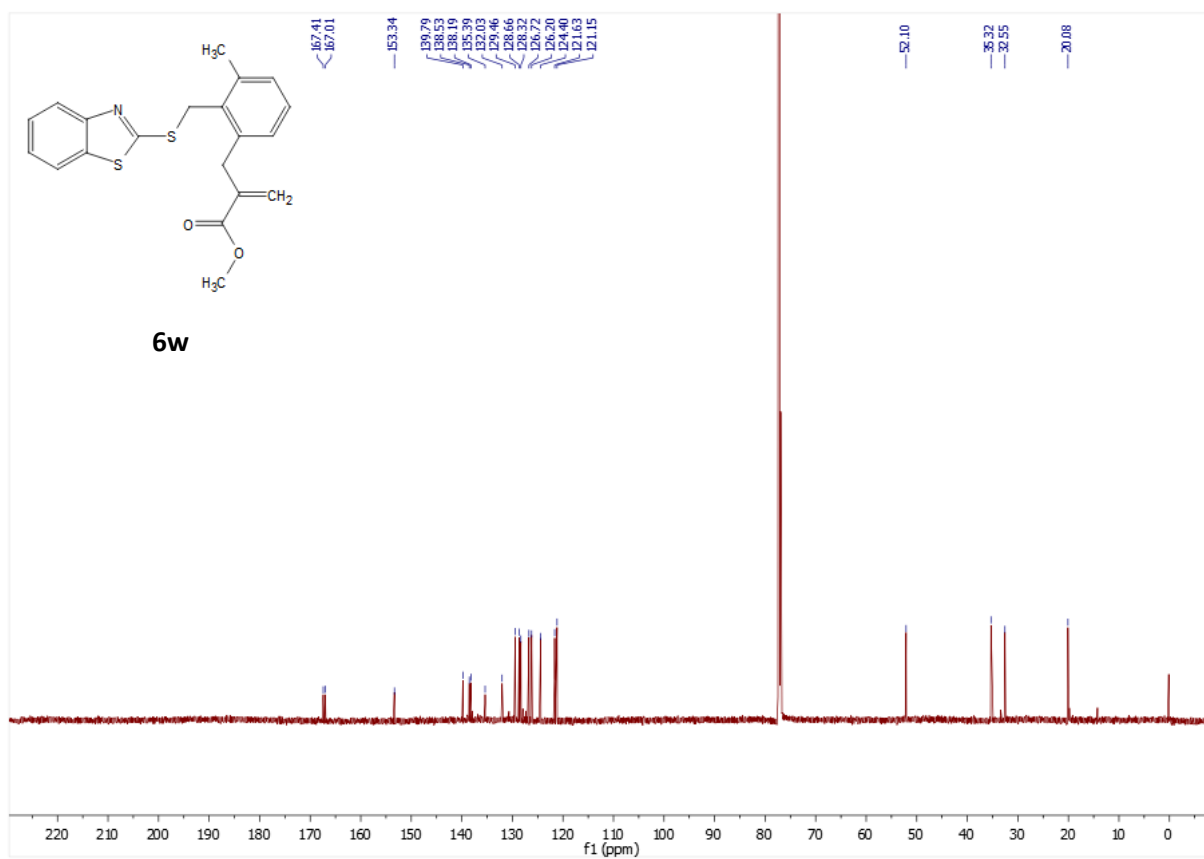

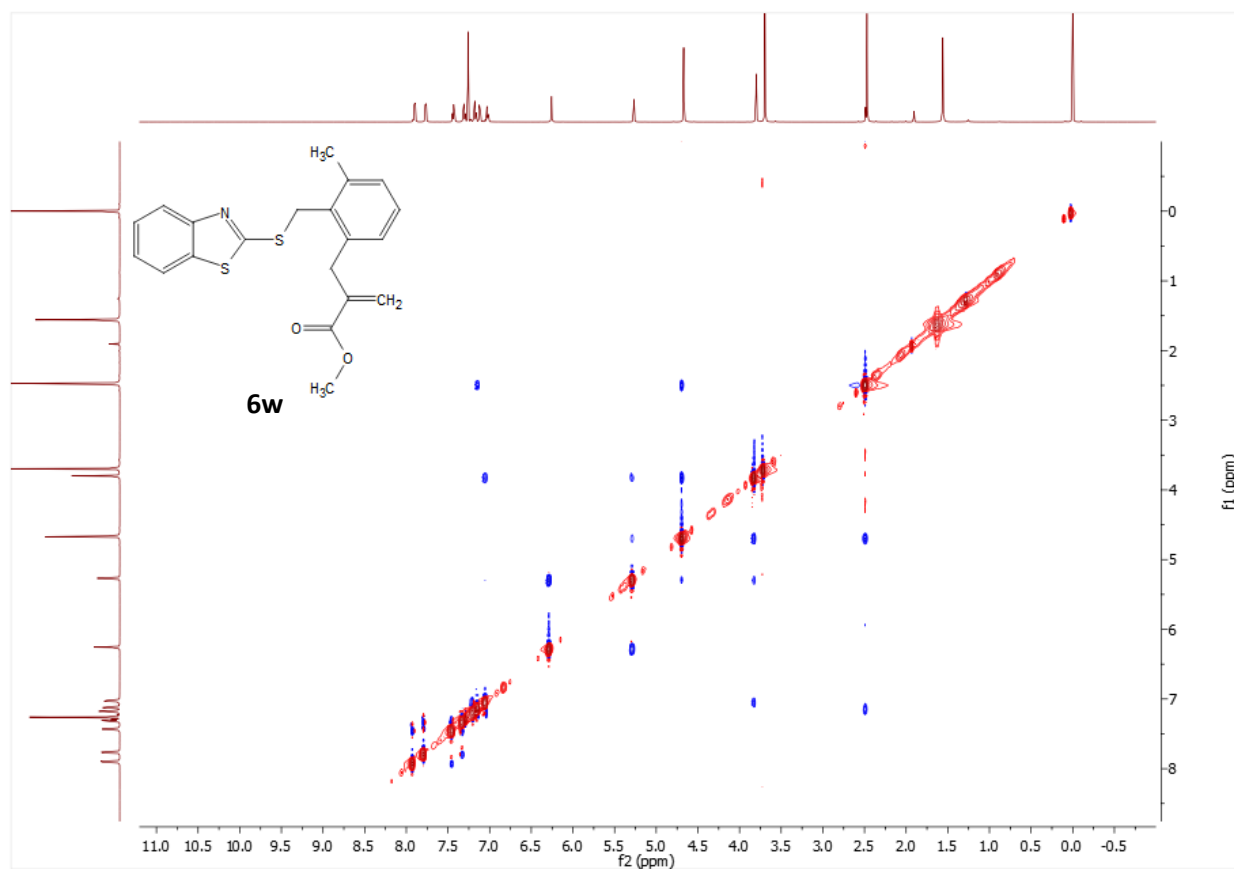

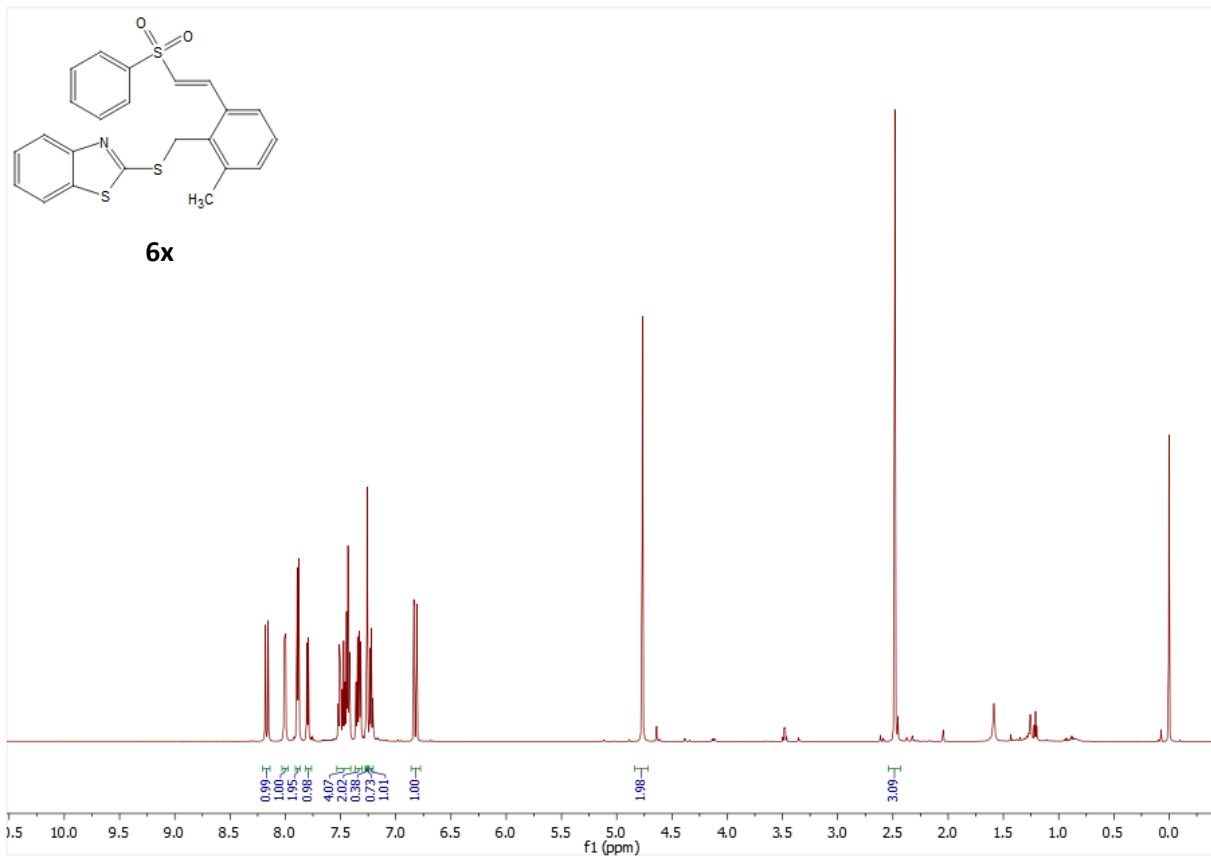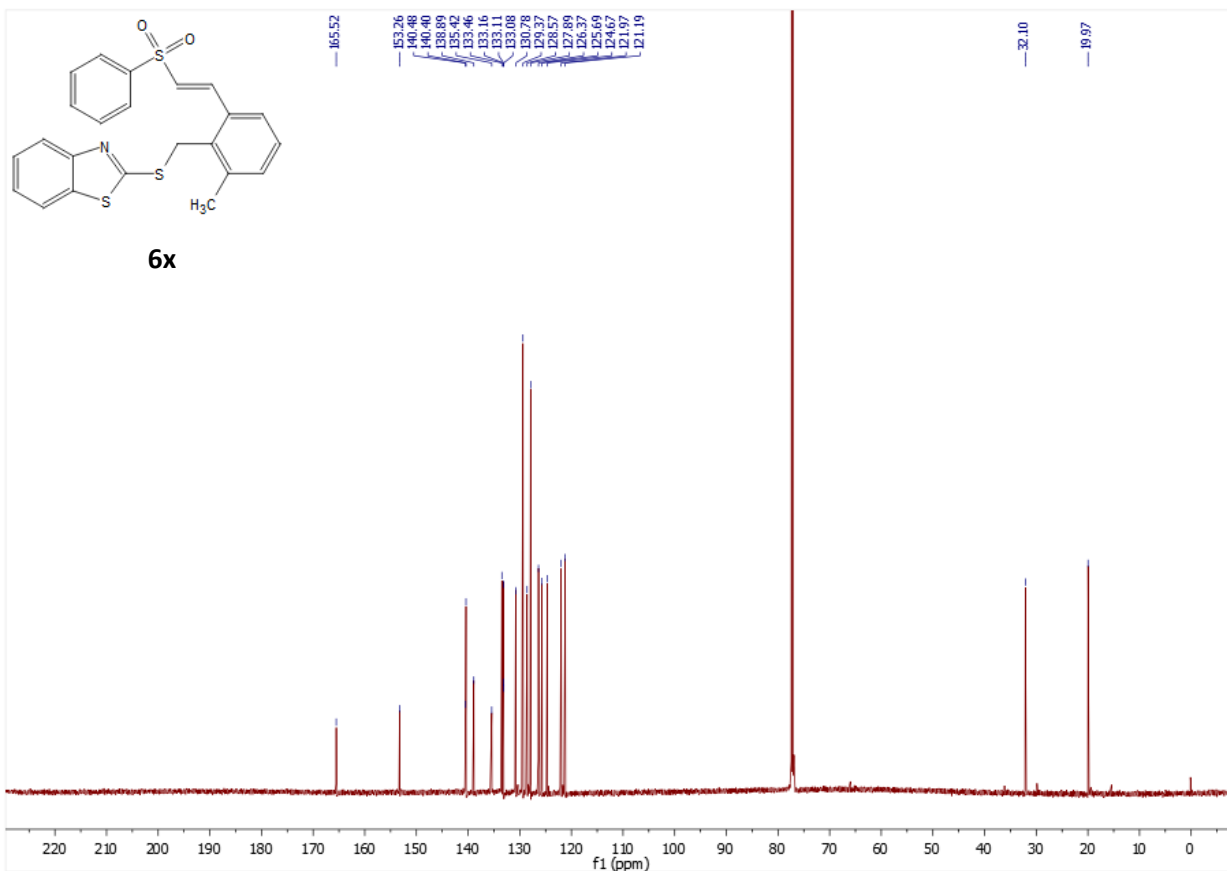

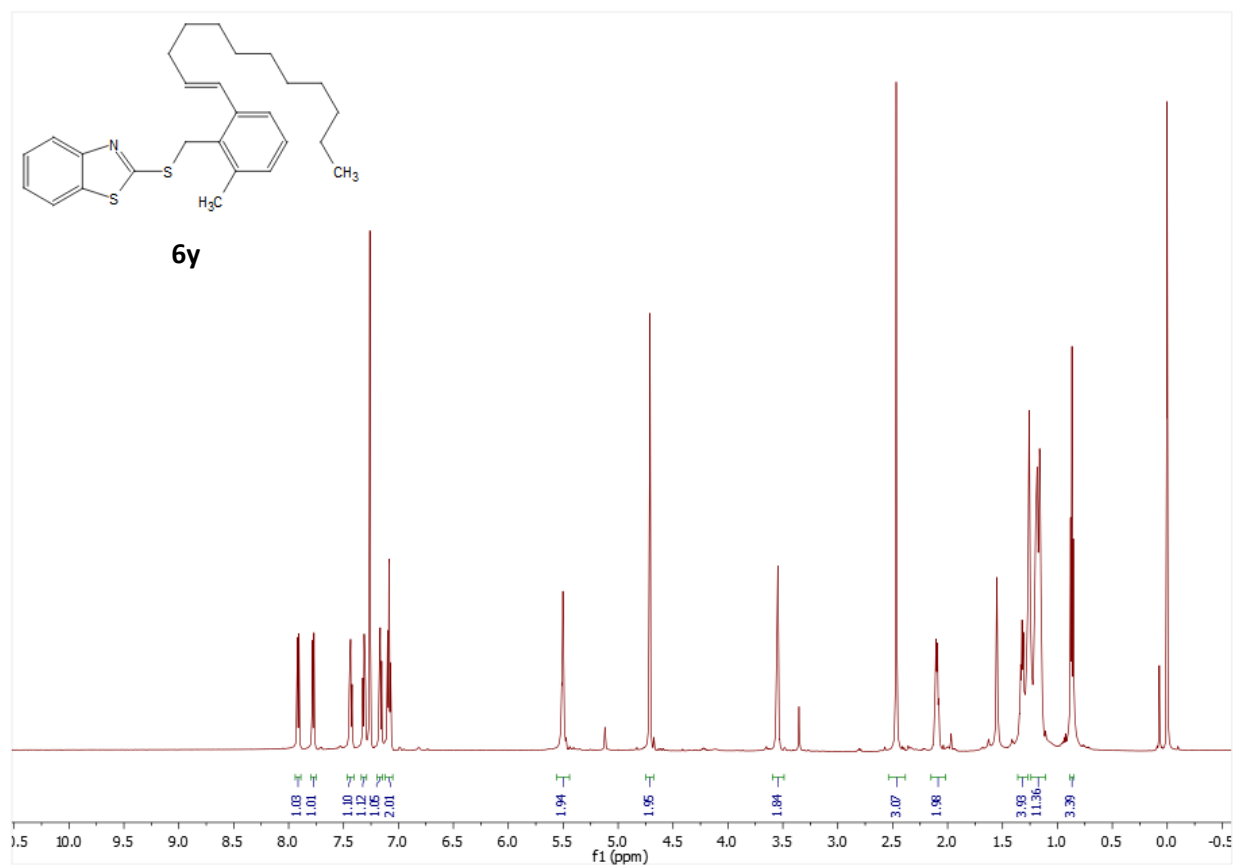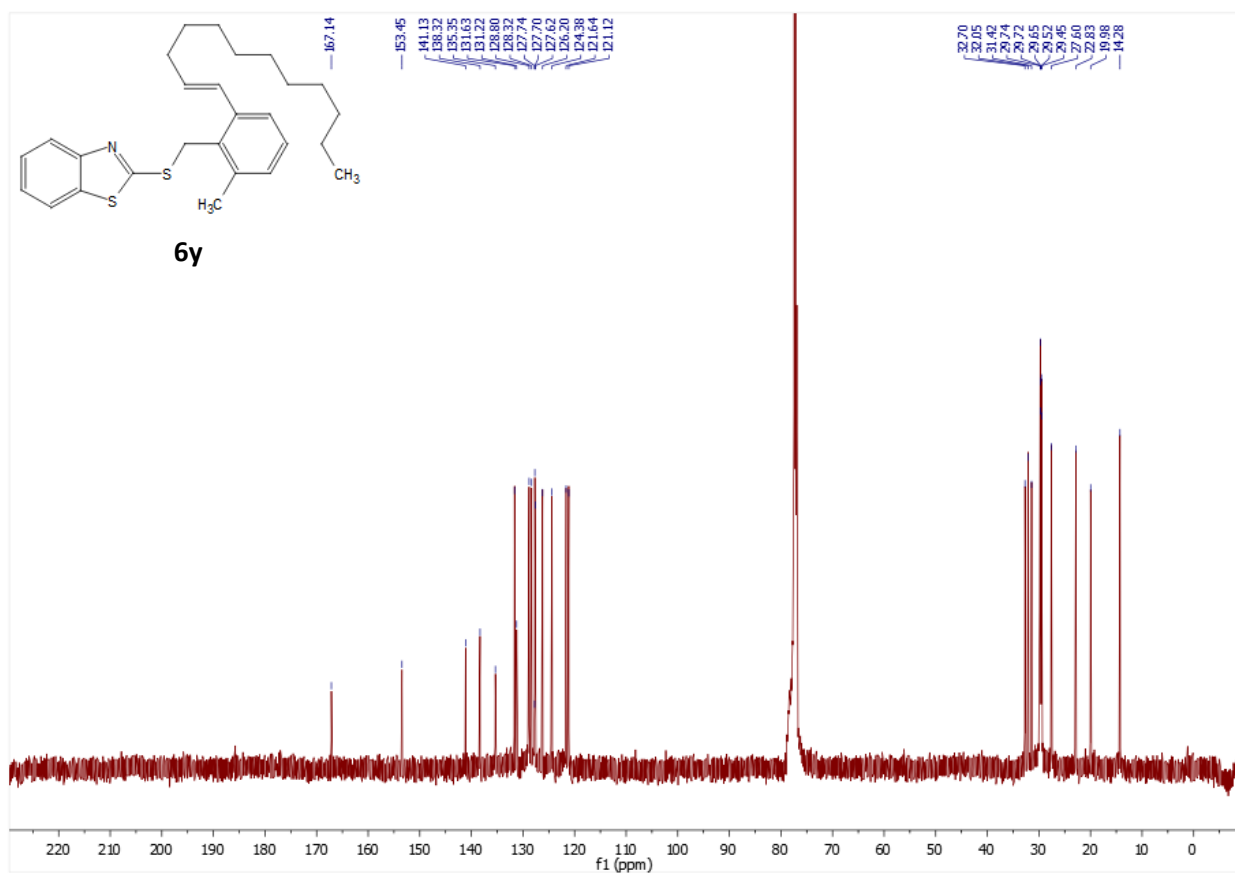



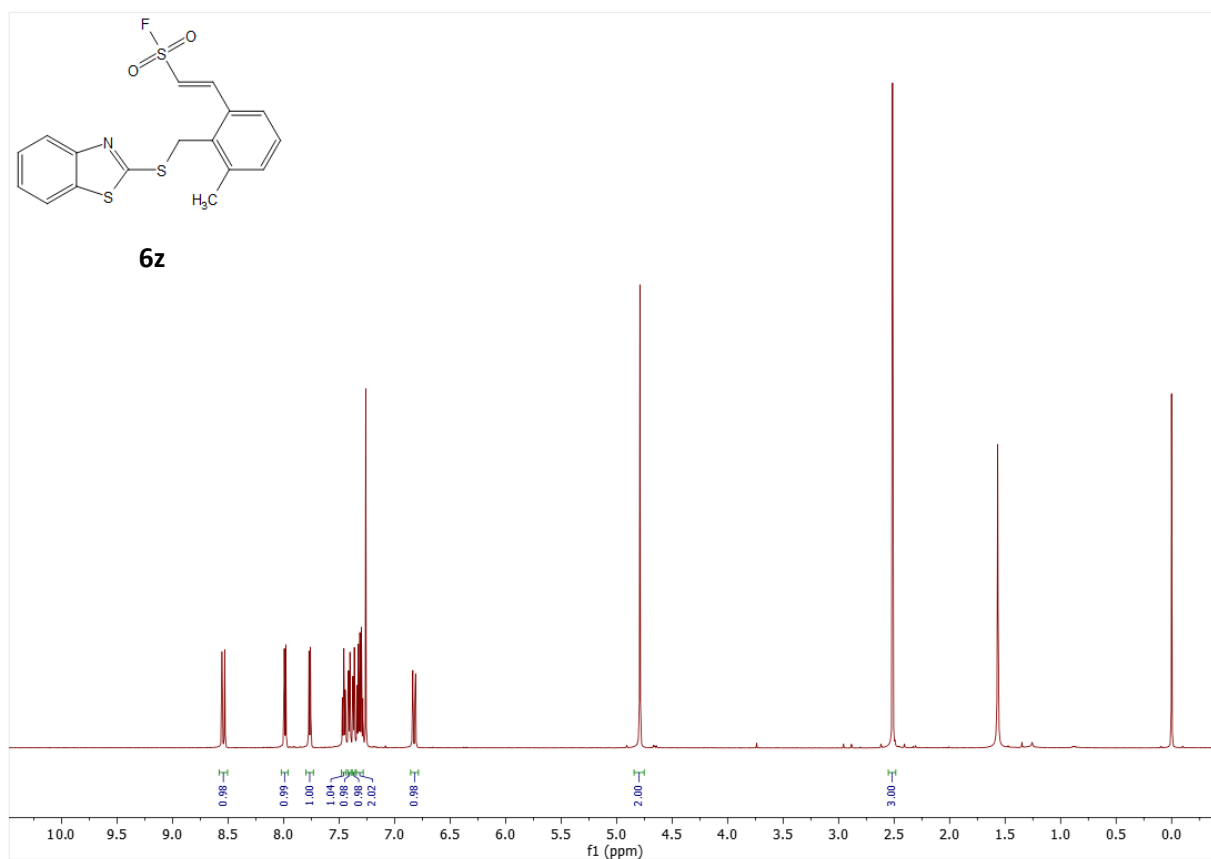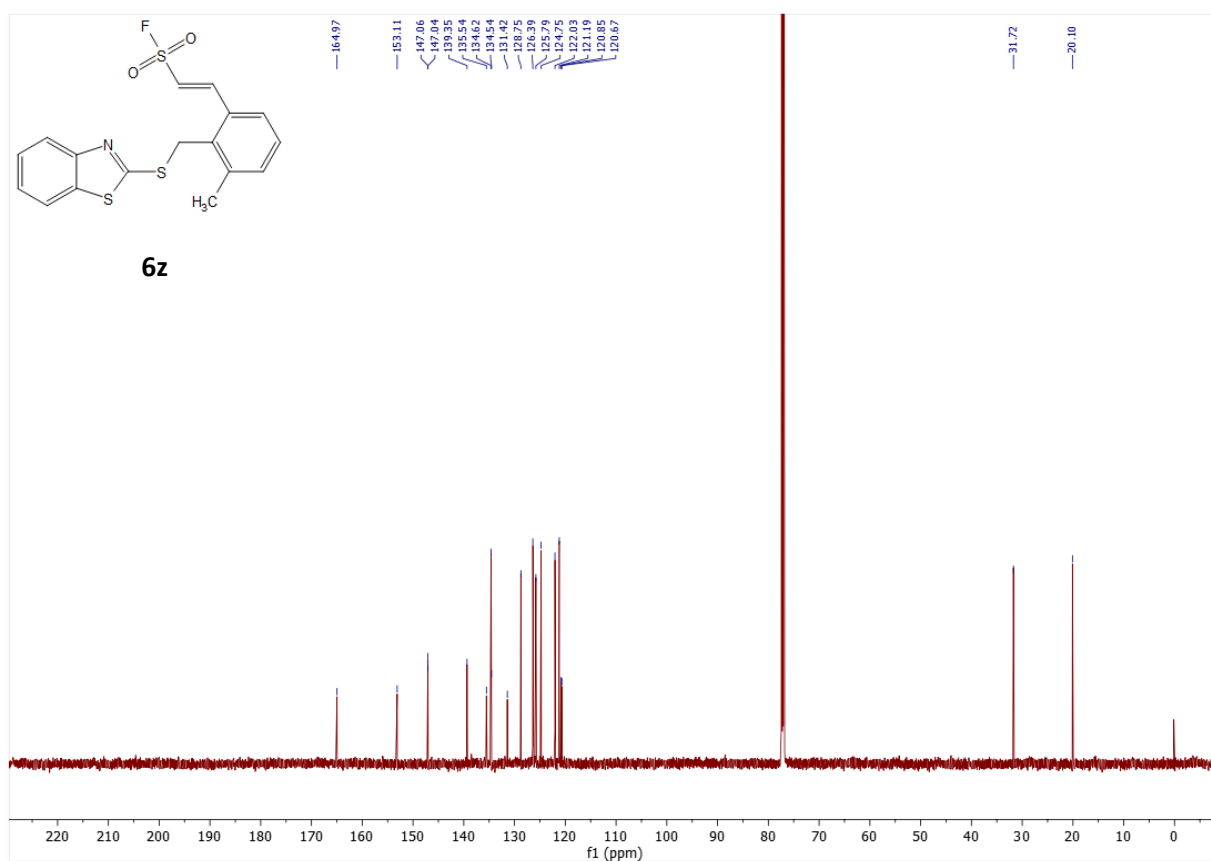

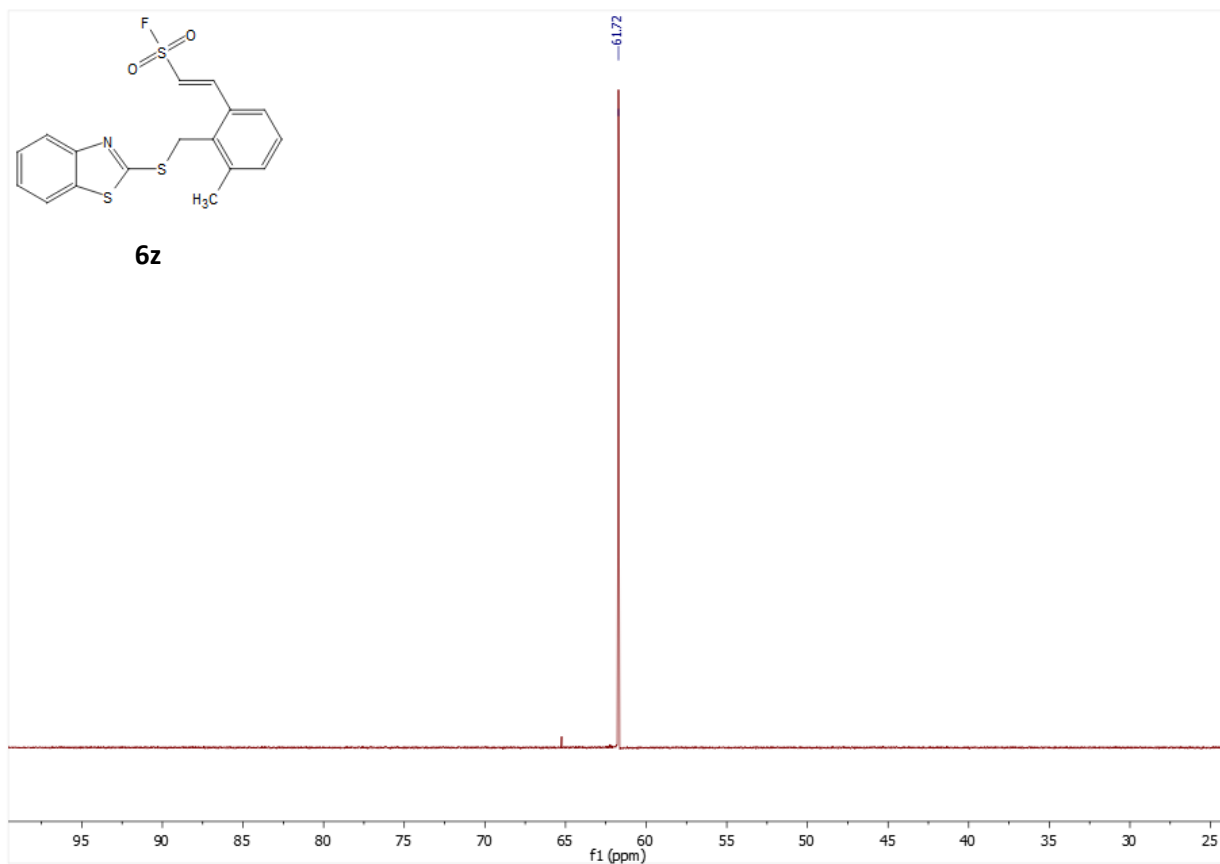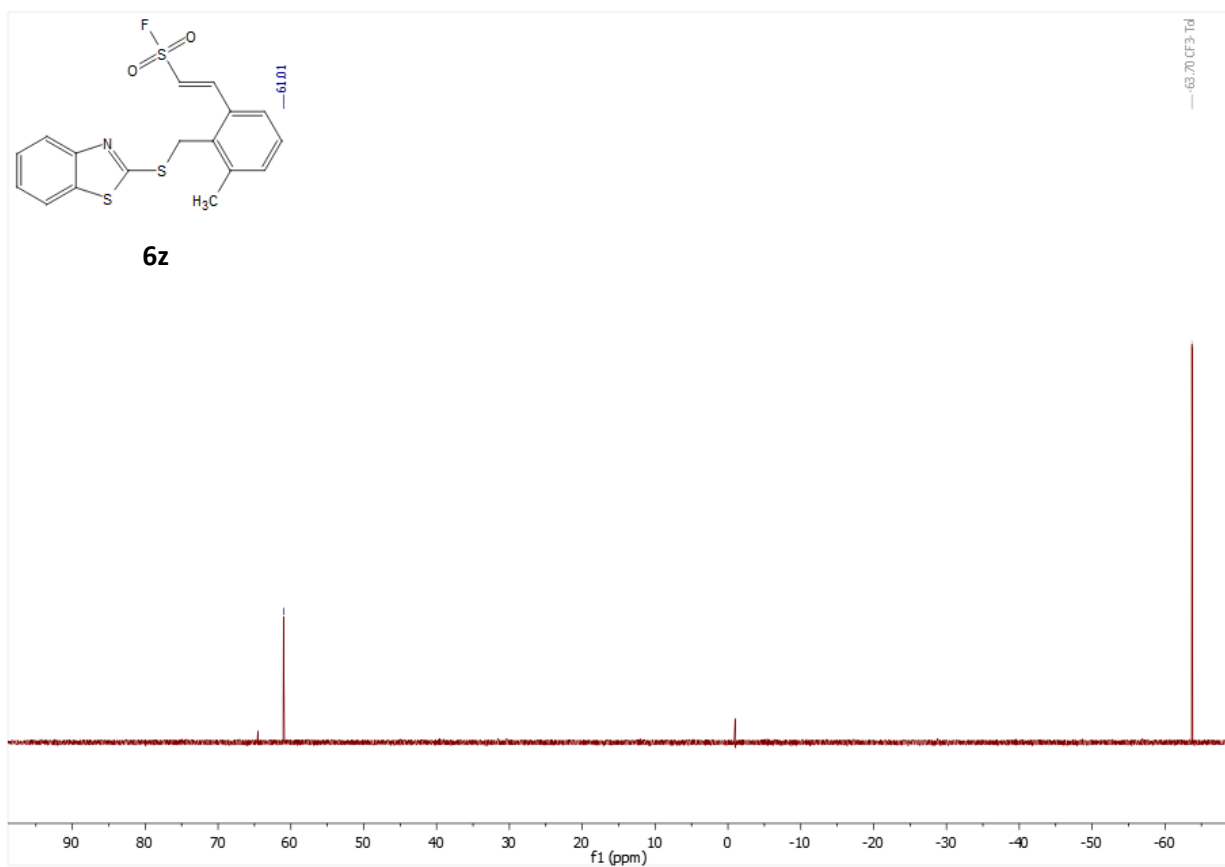

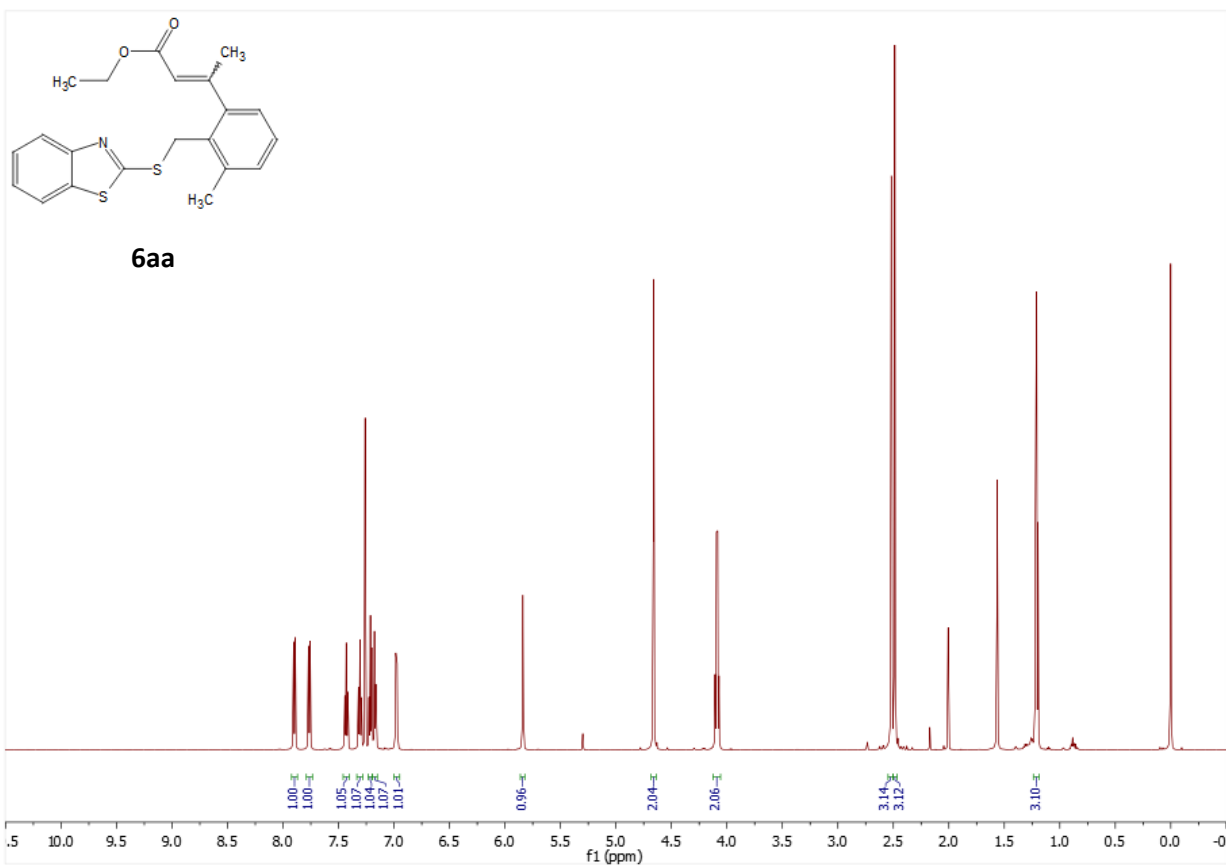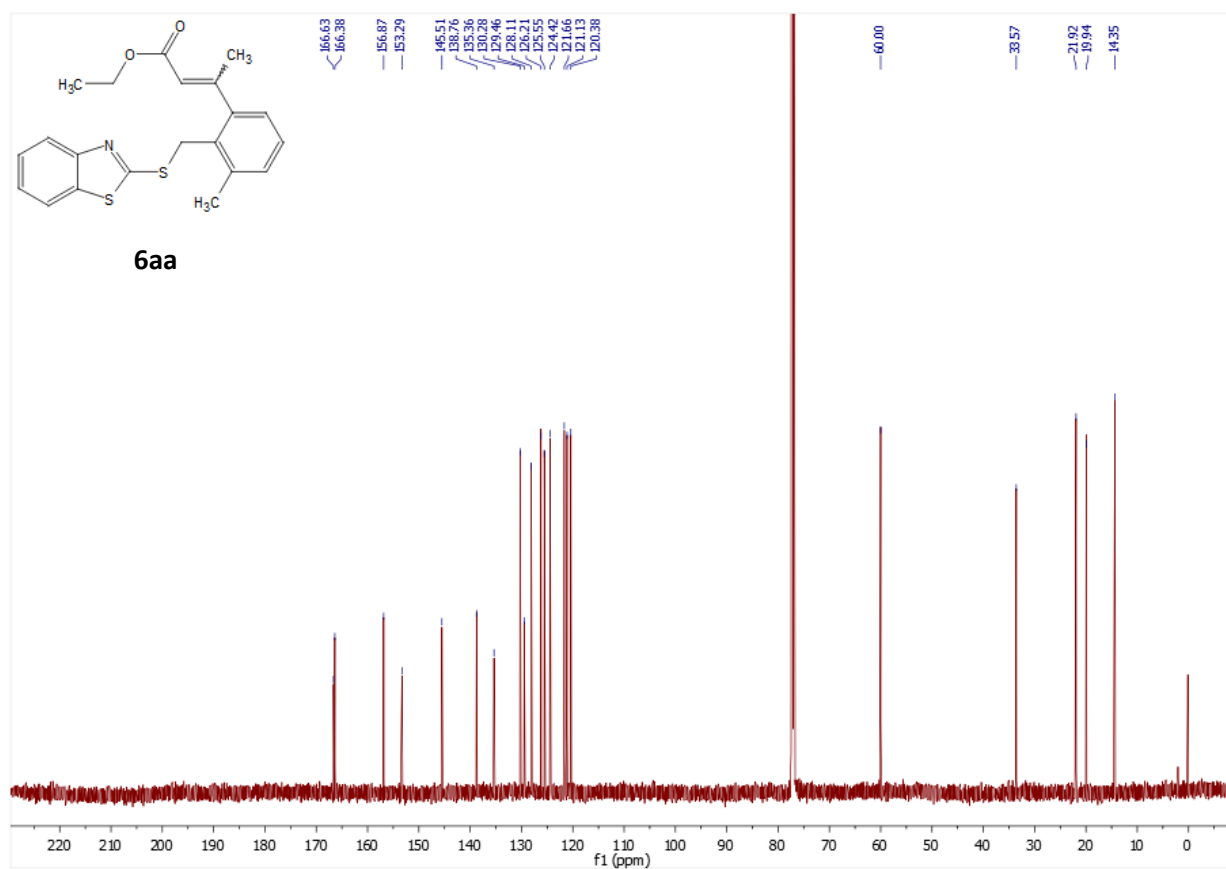

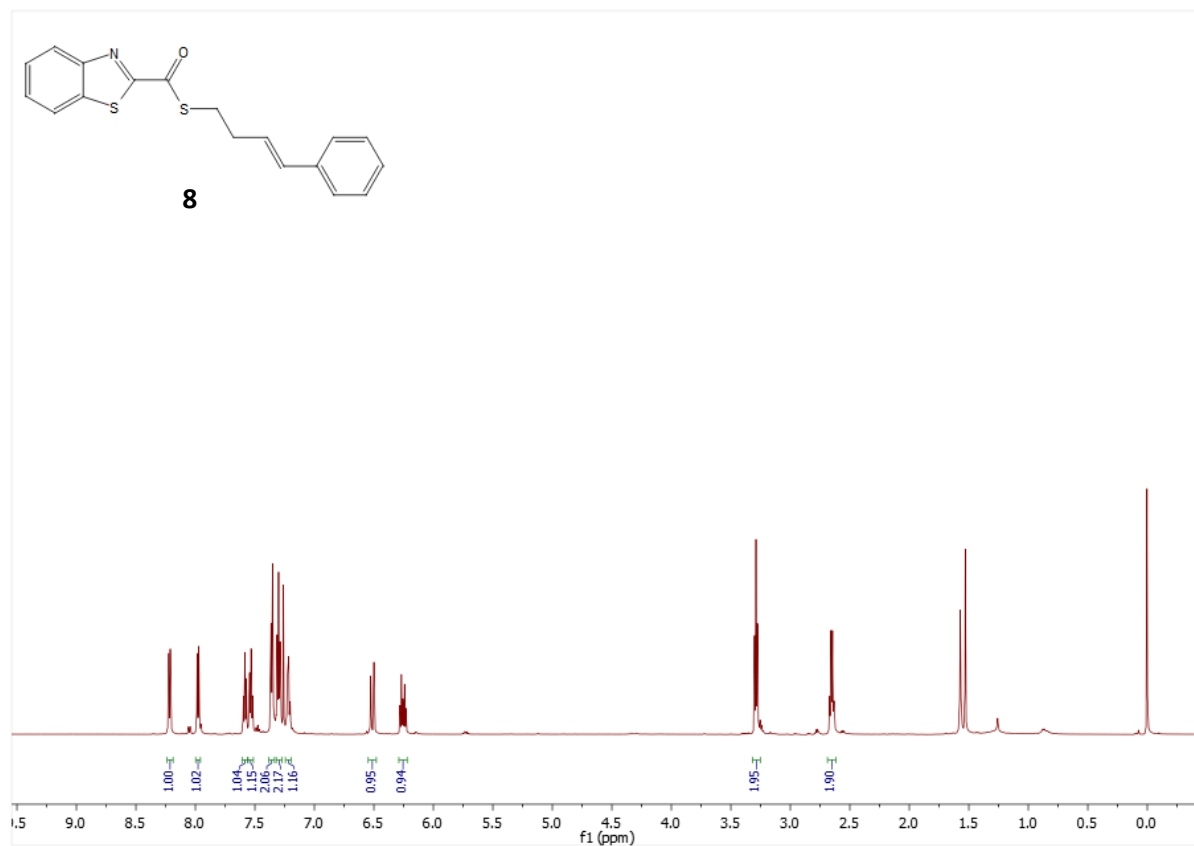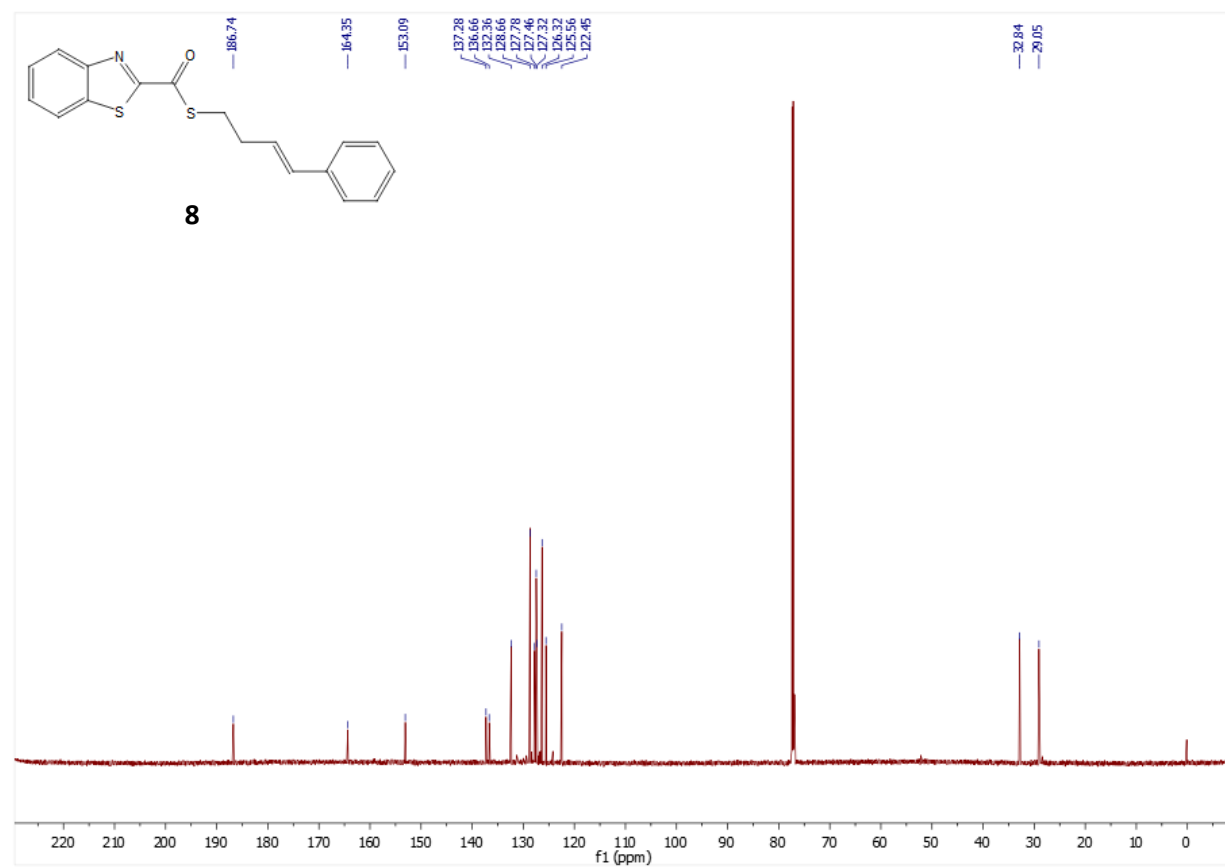

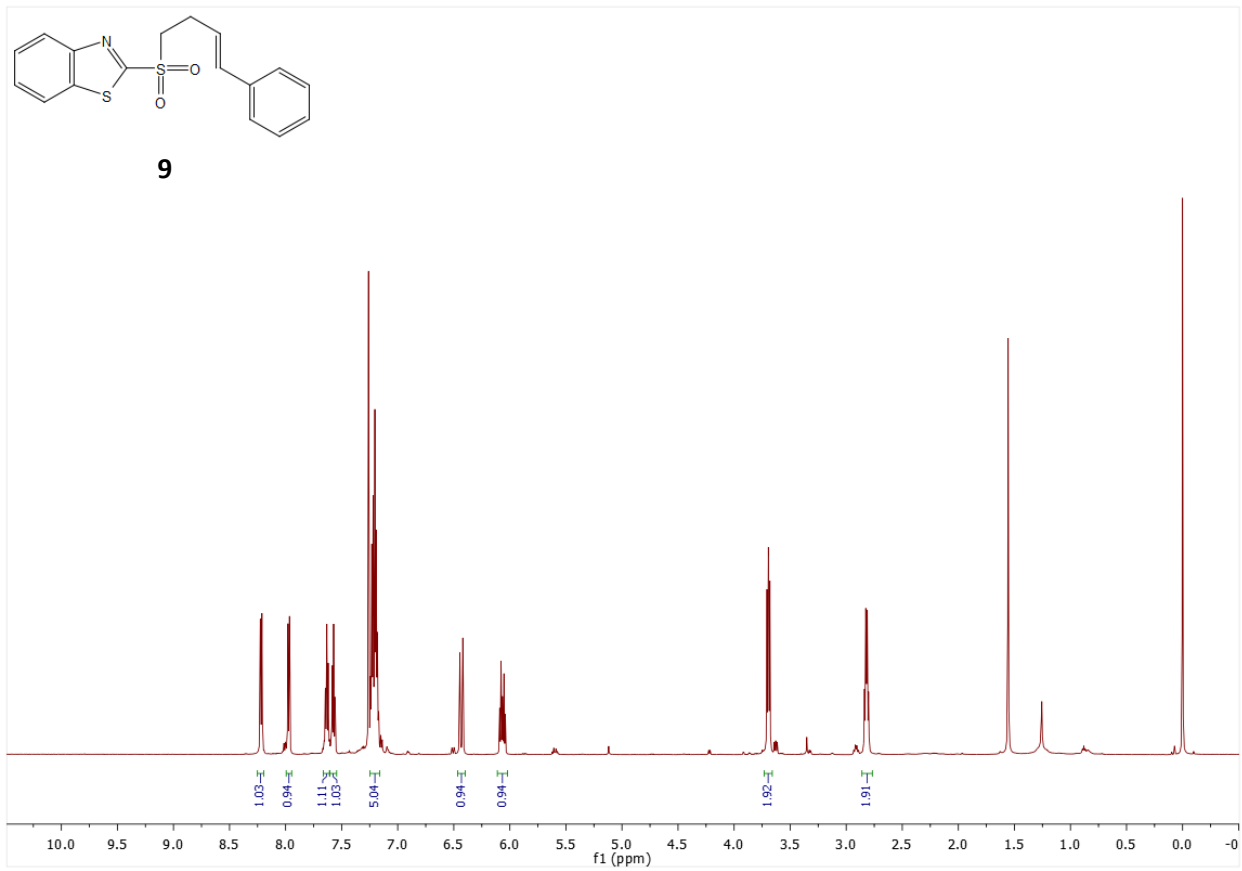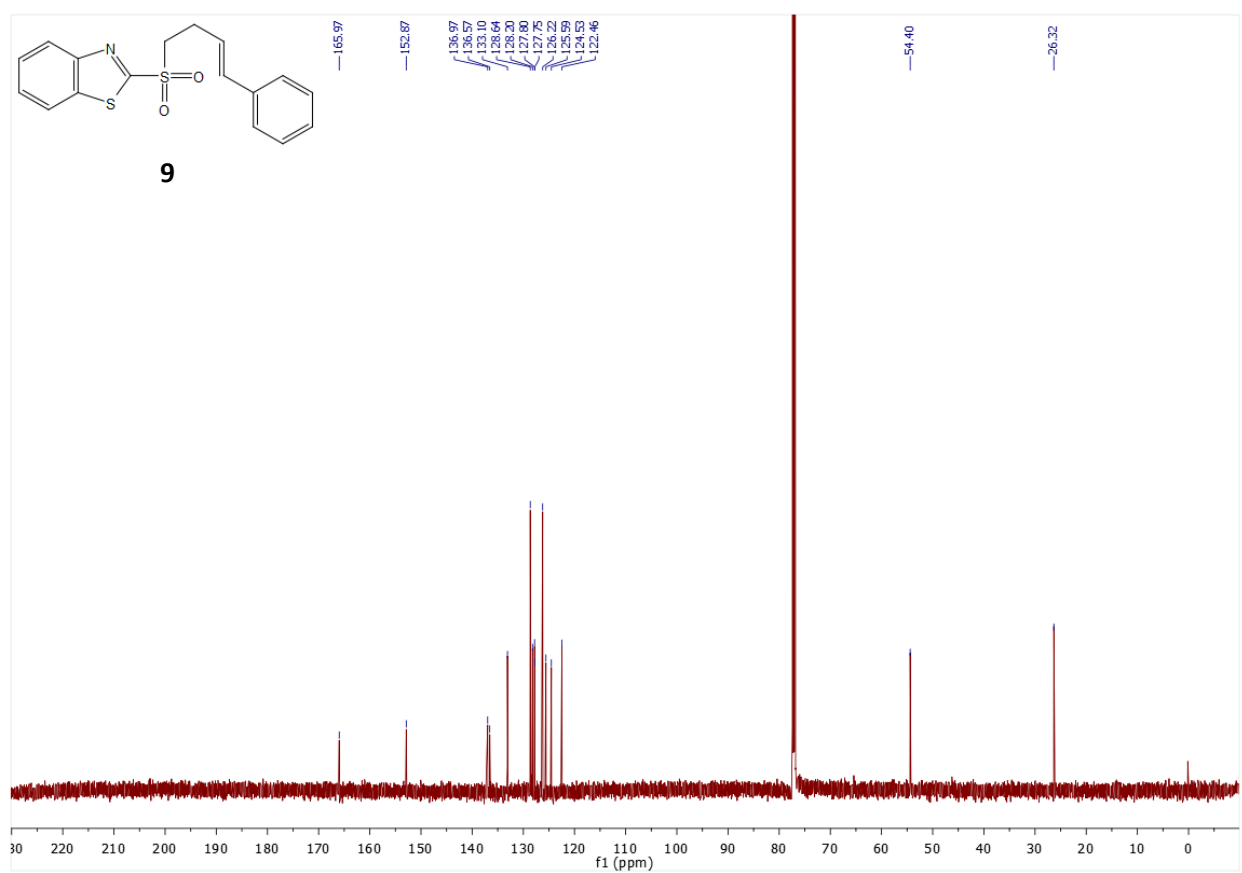

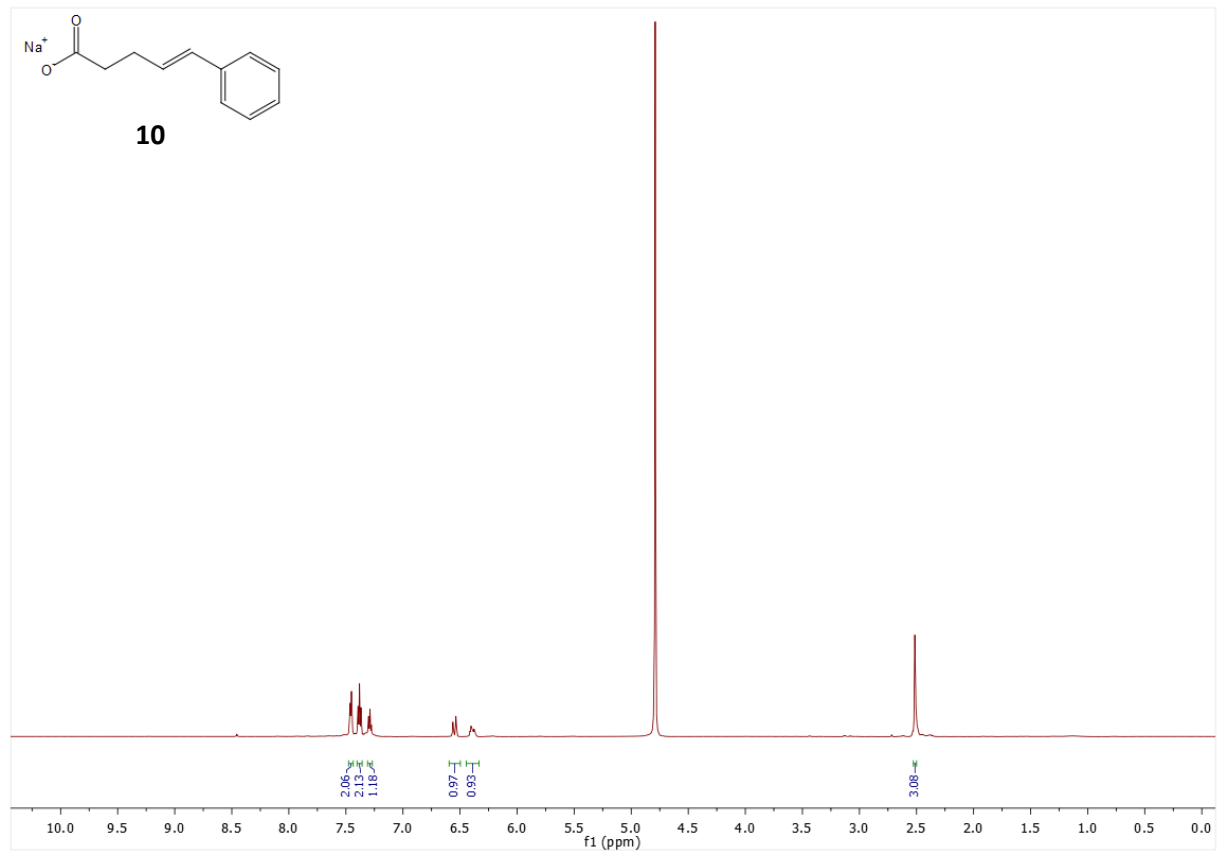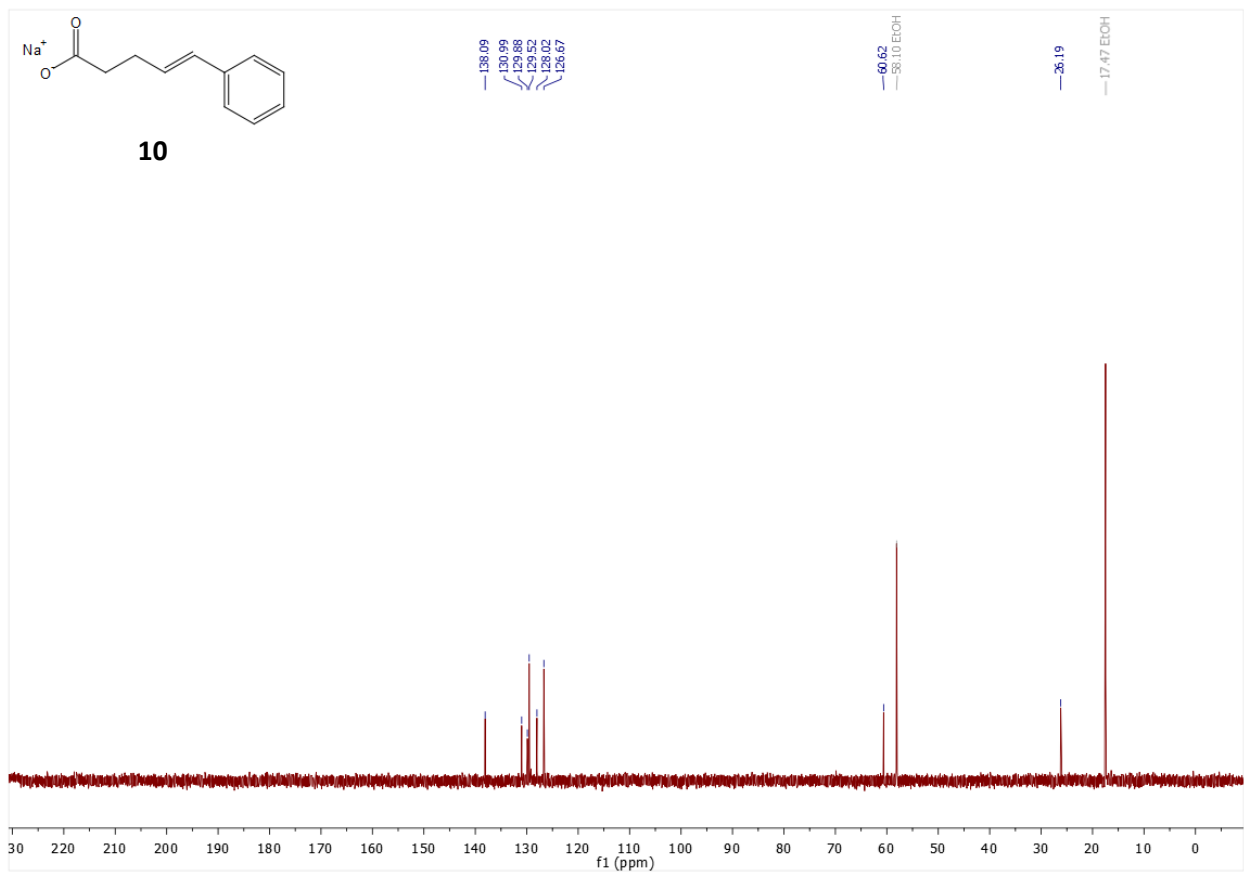

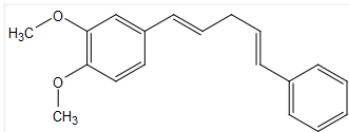

11

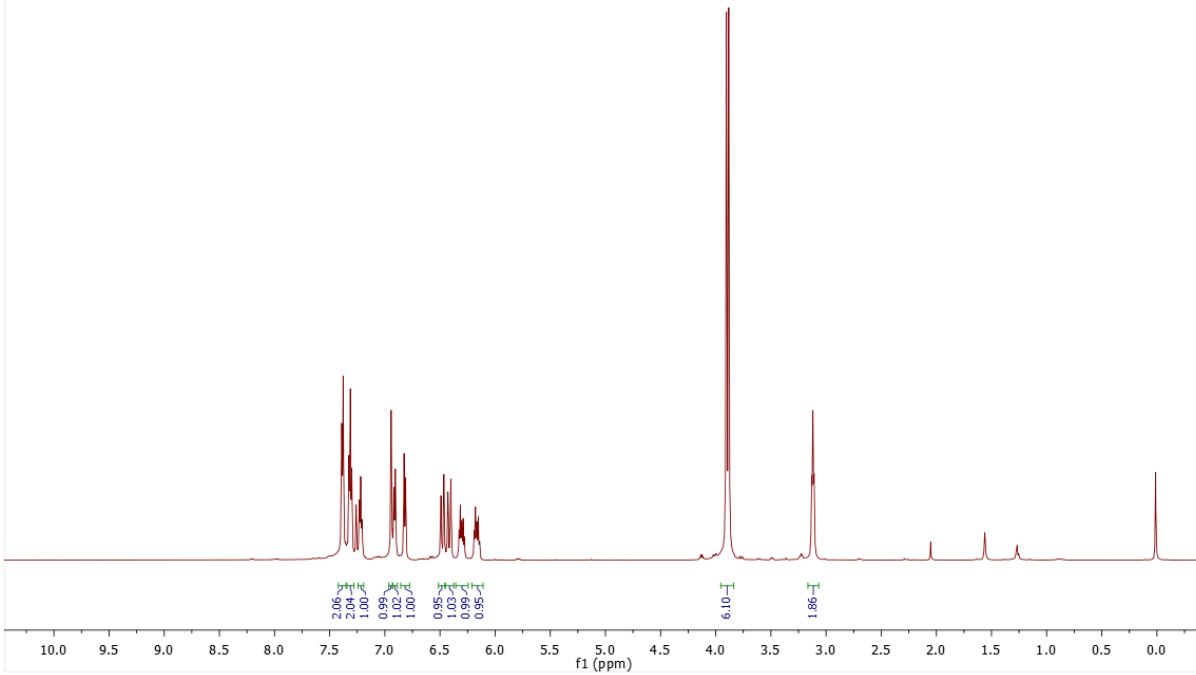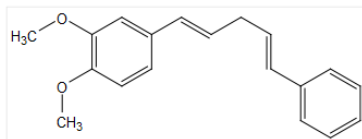

11

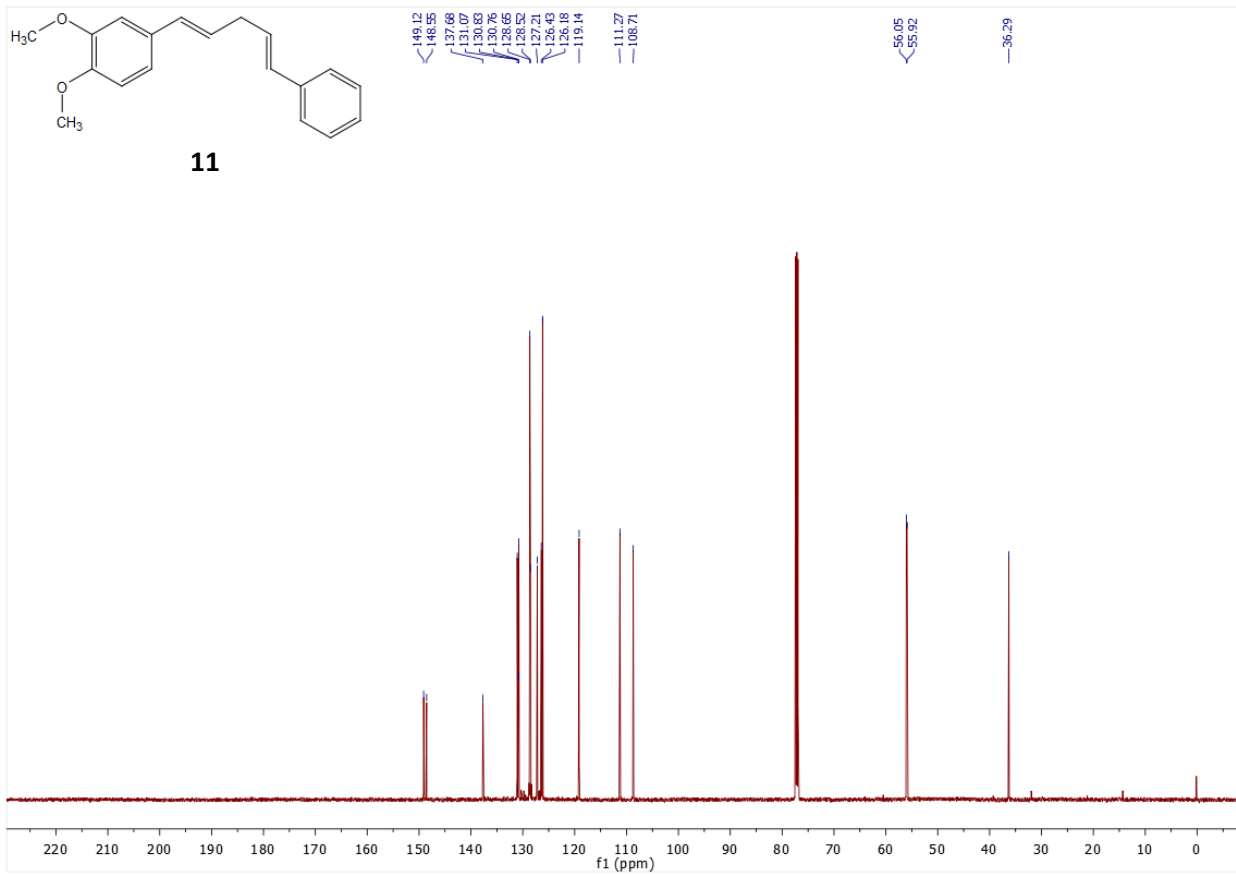

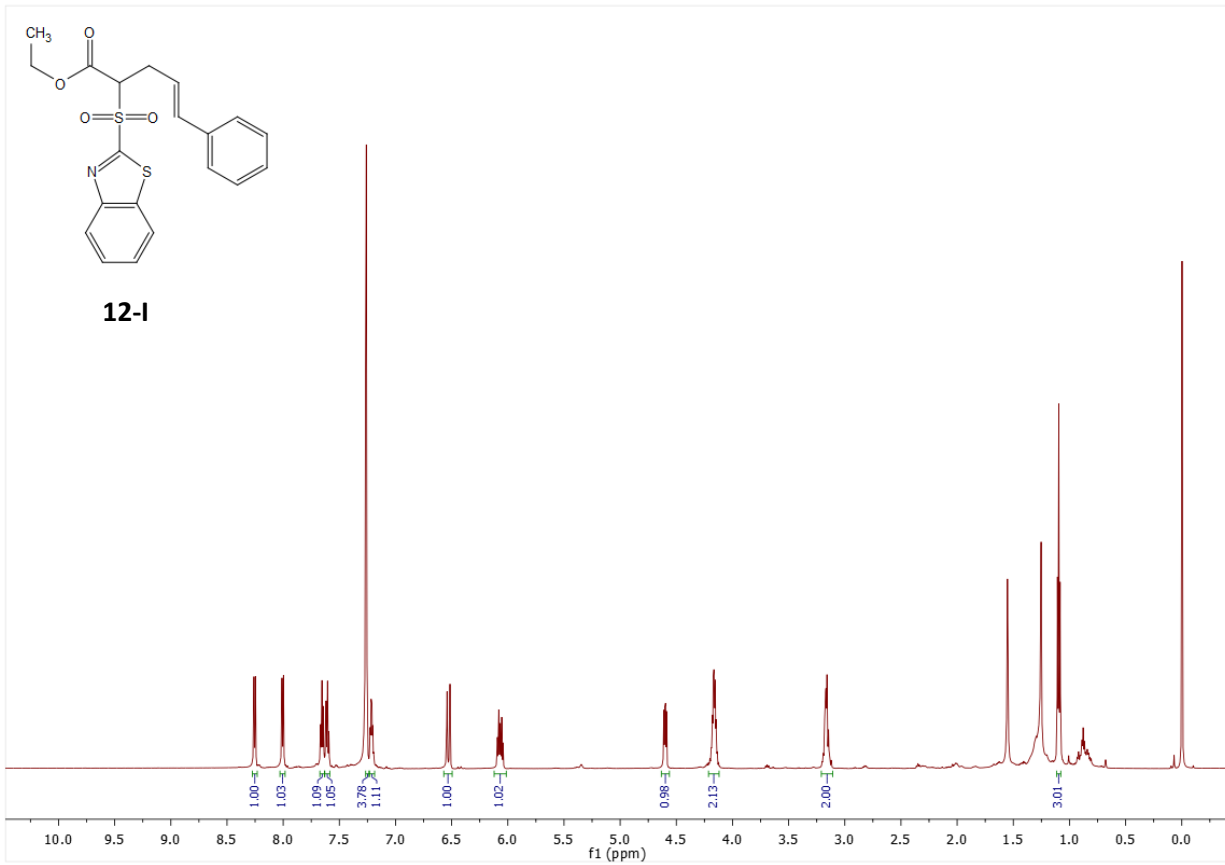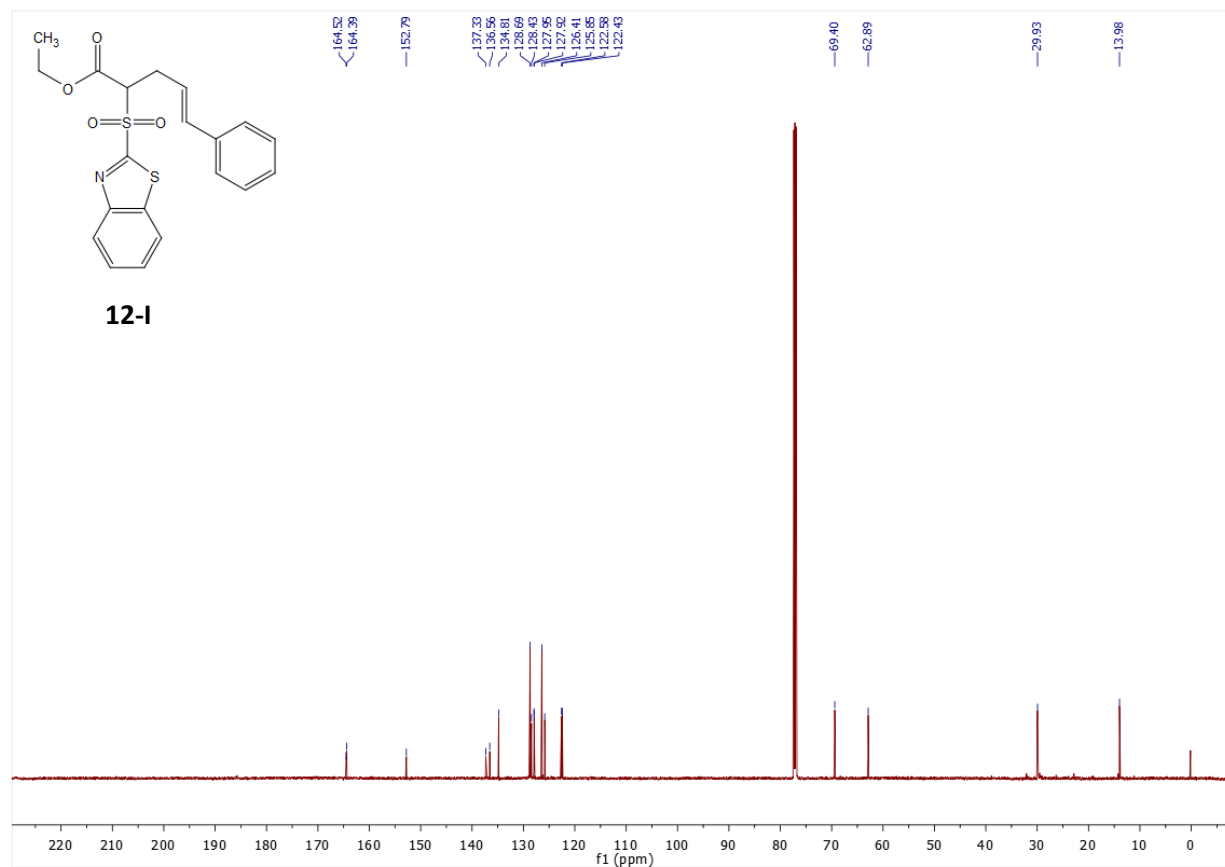



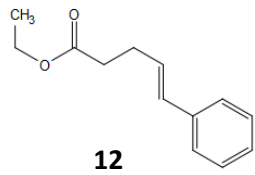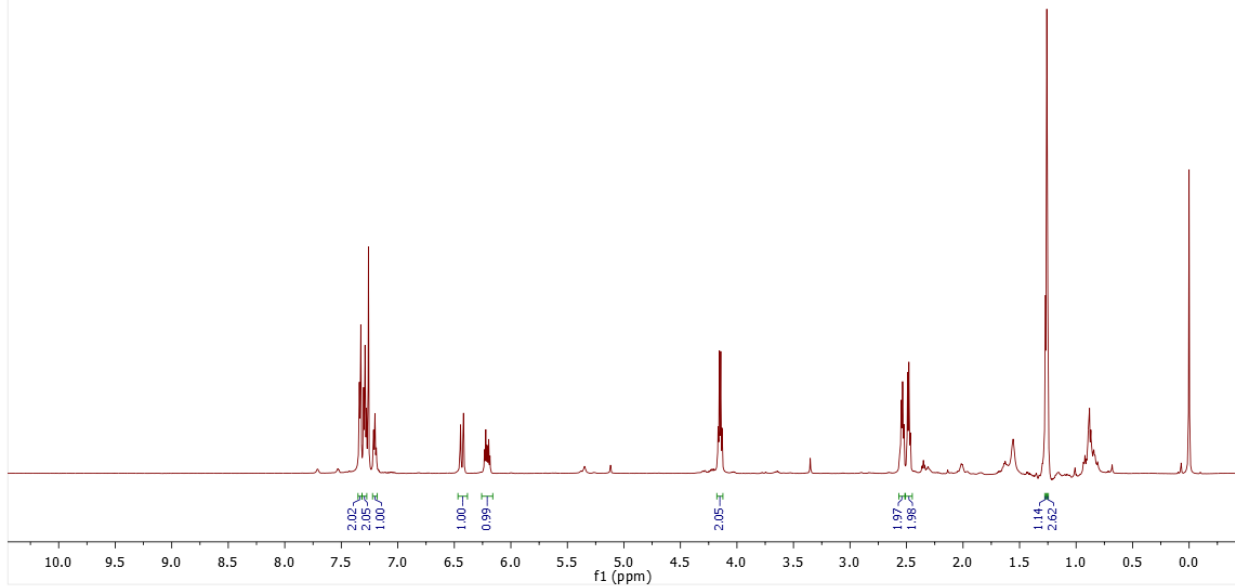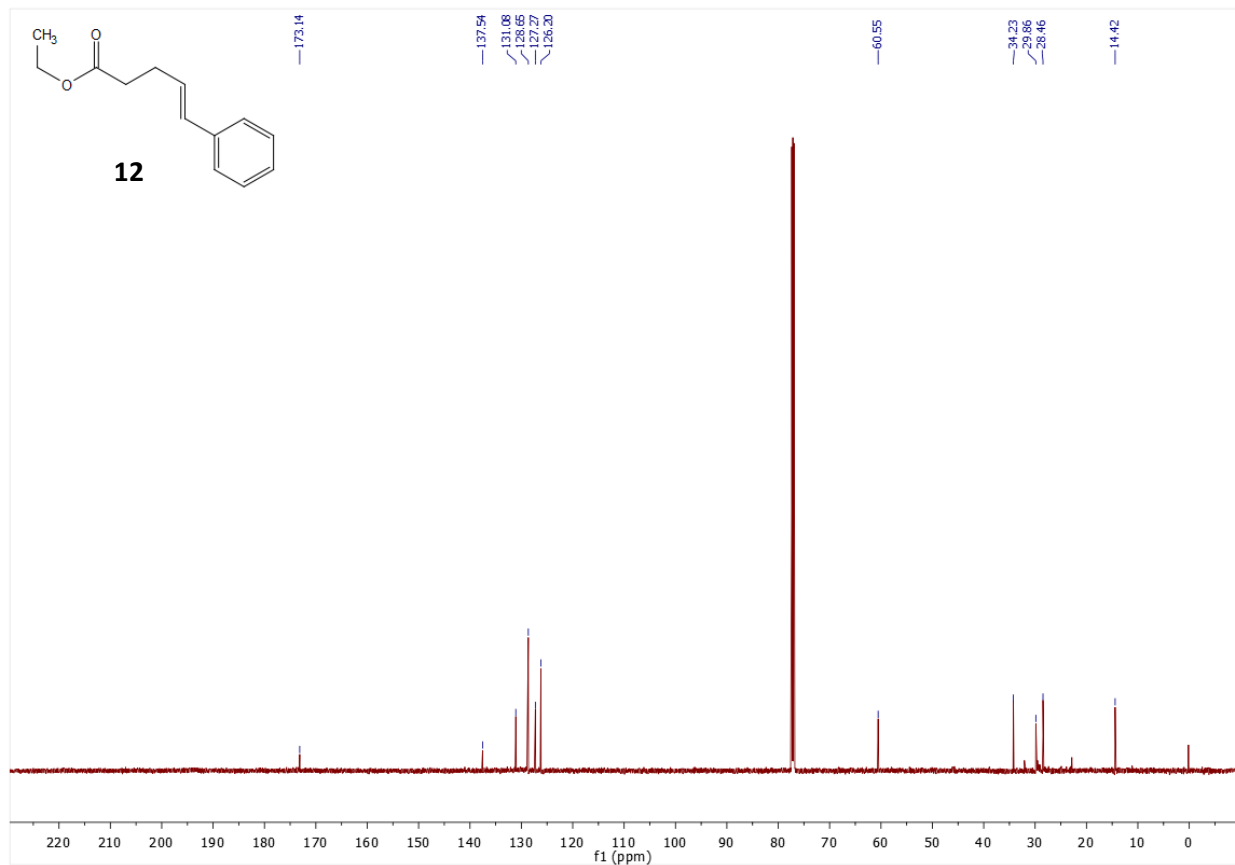

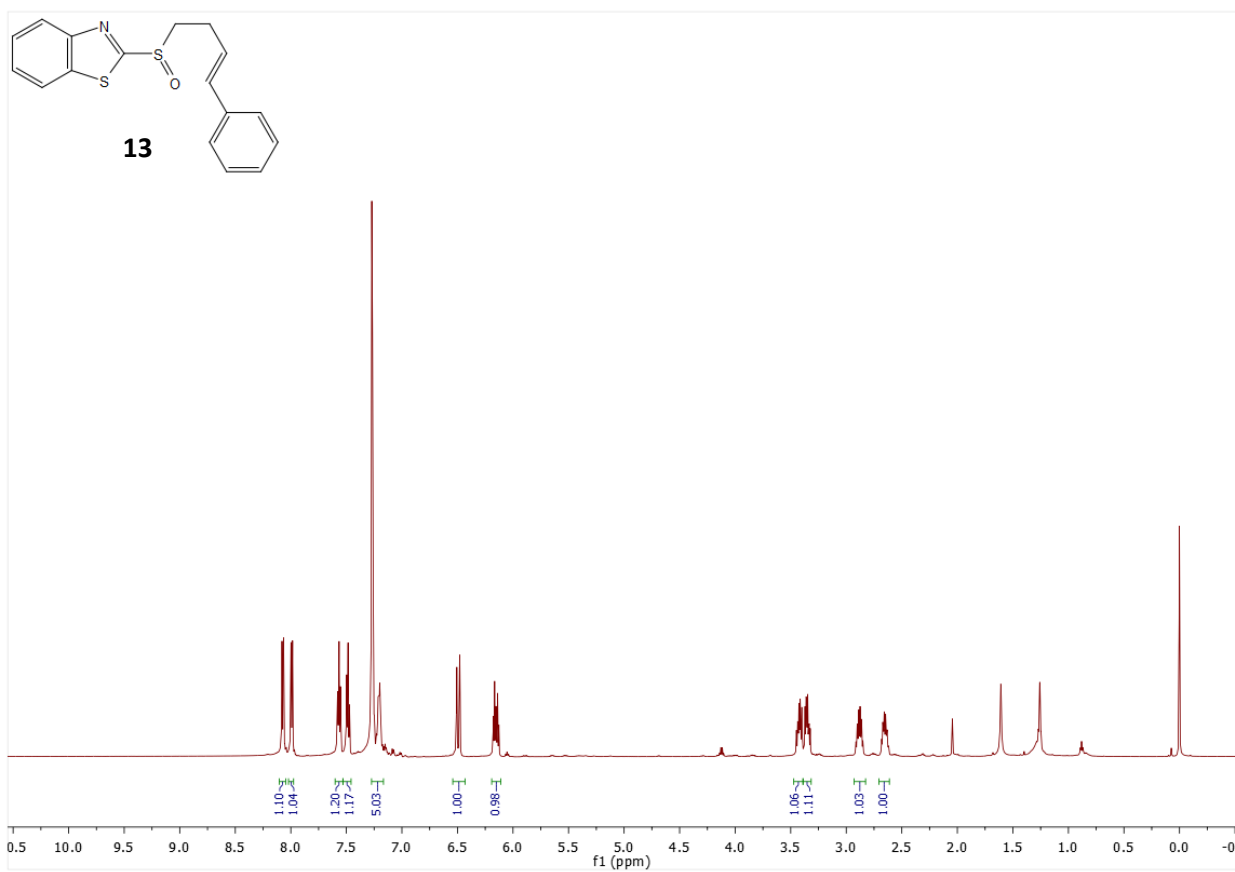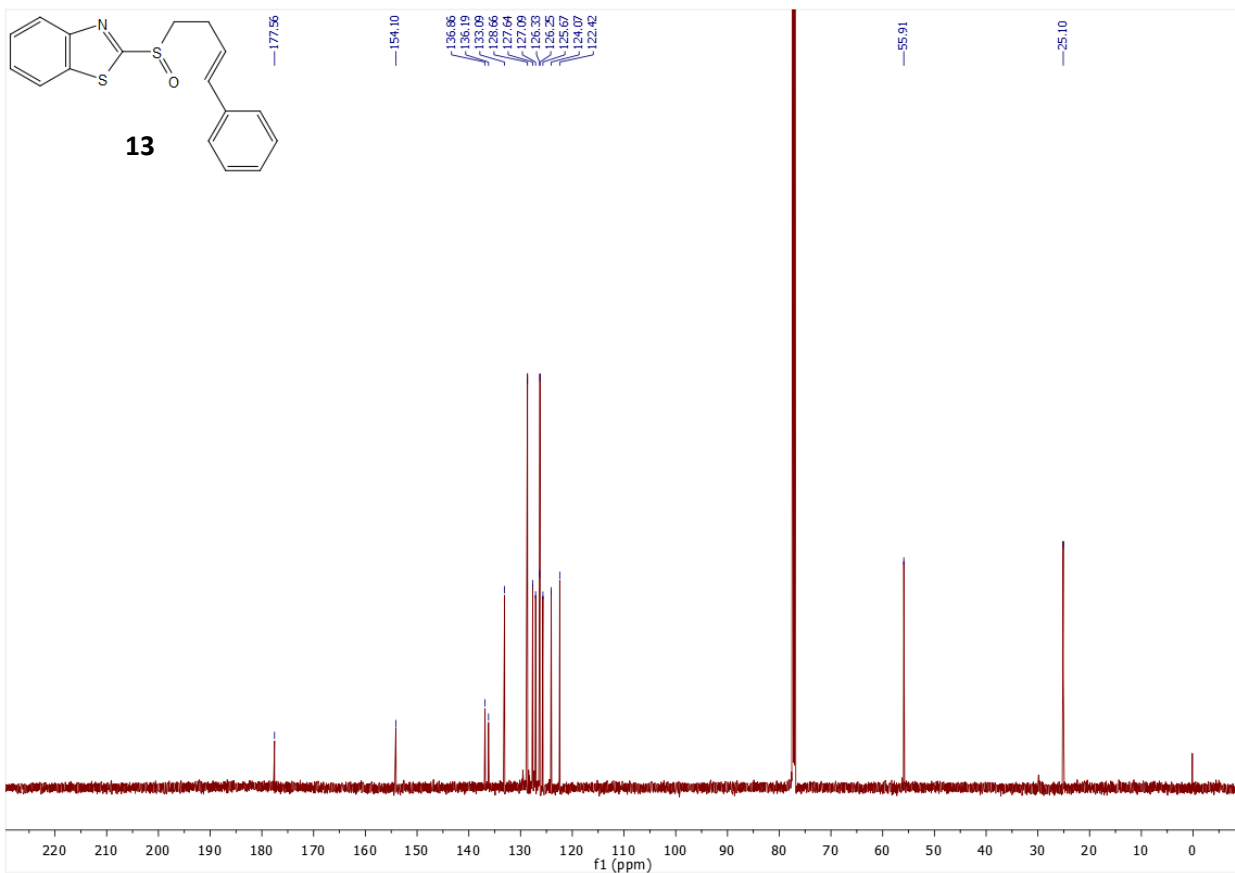

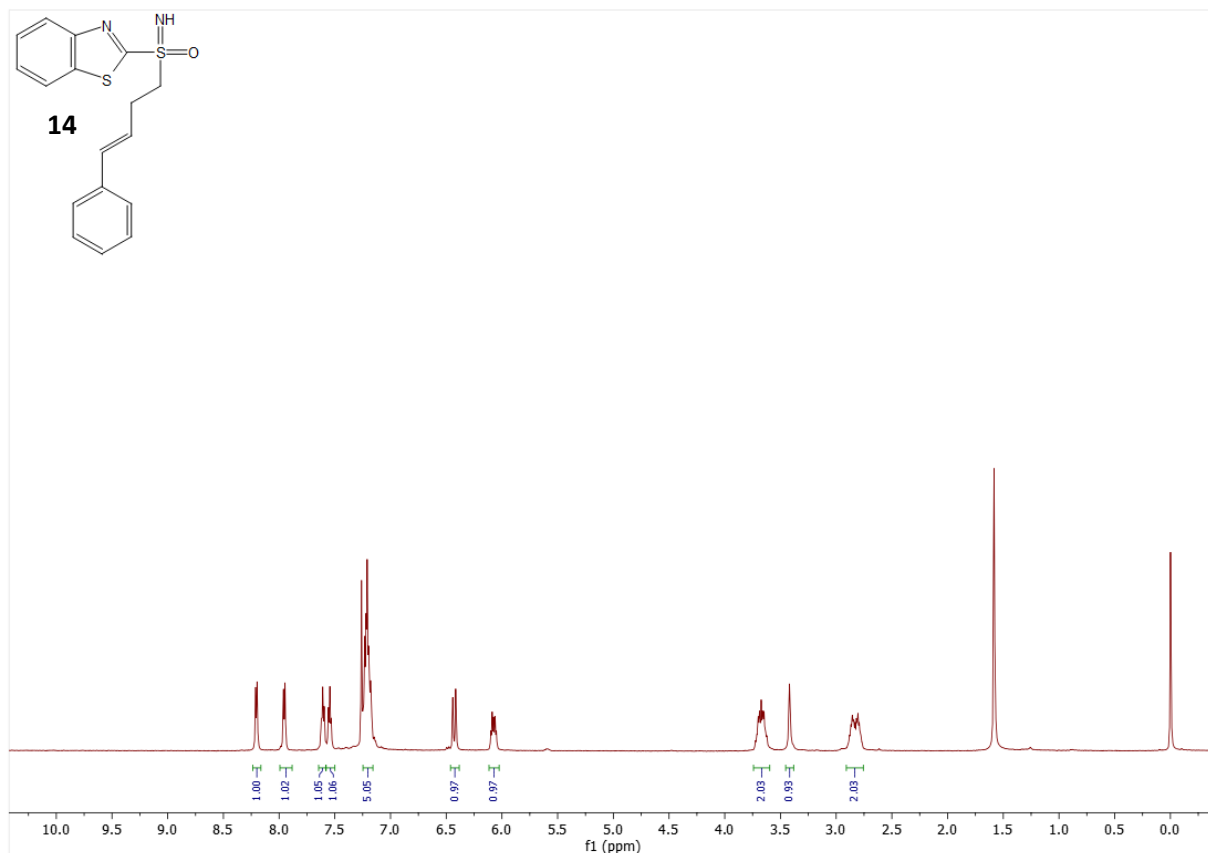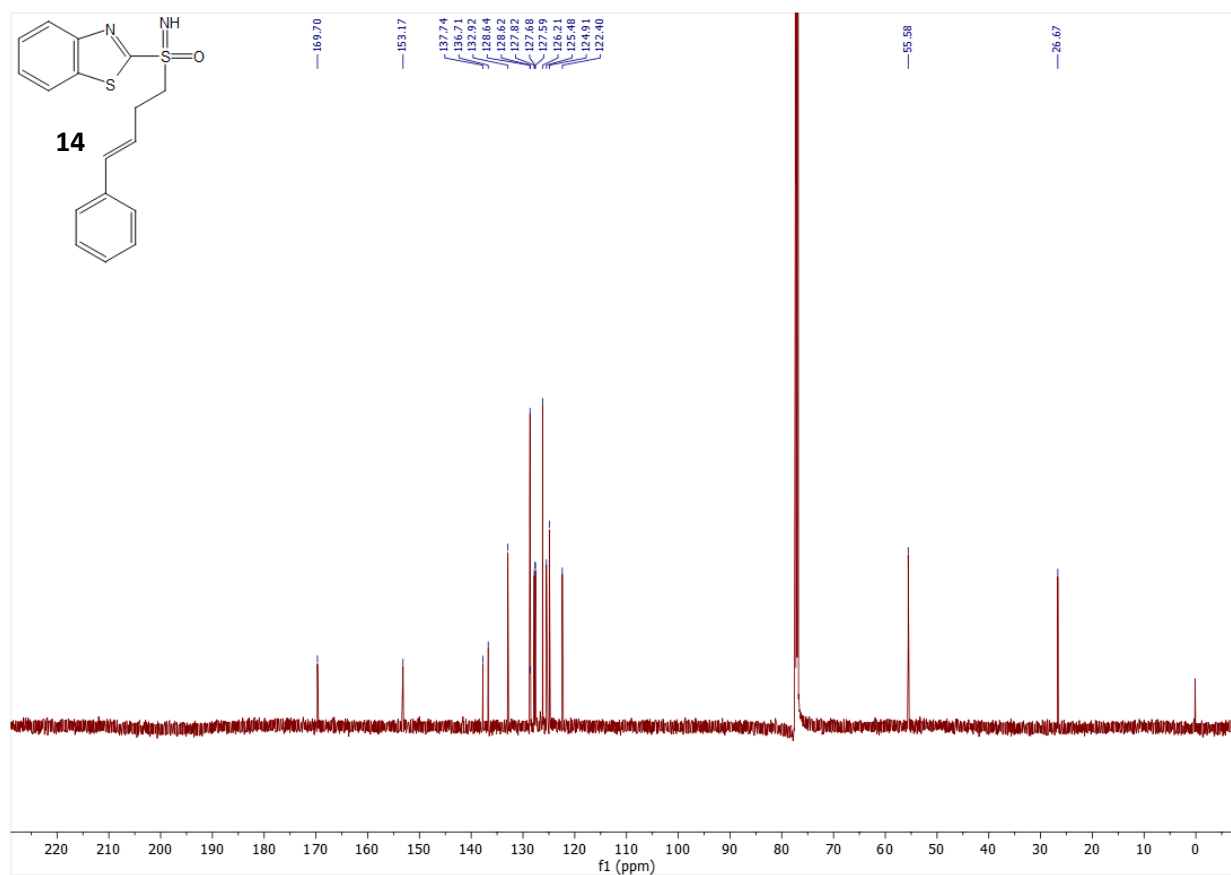

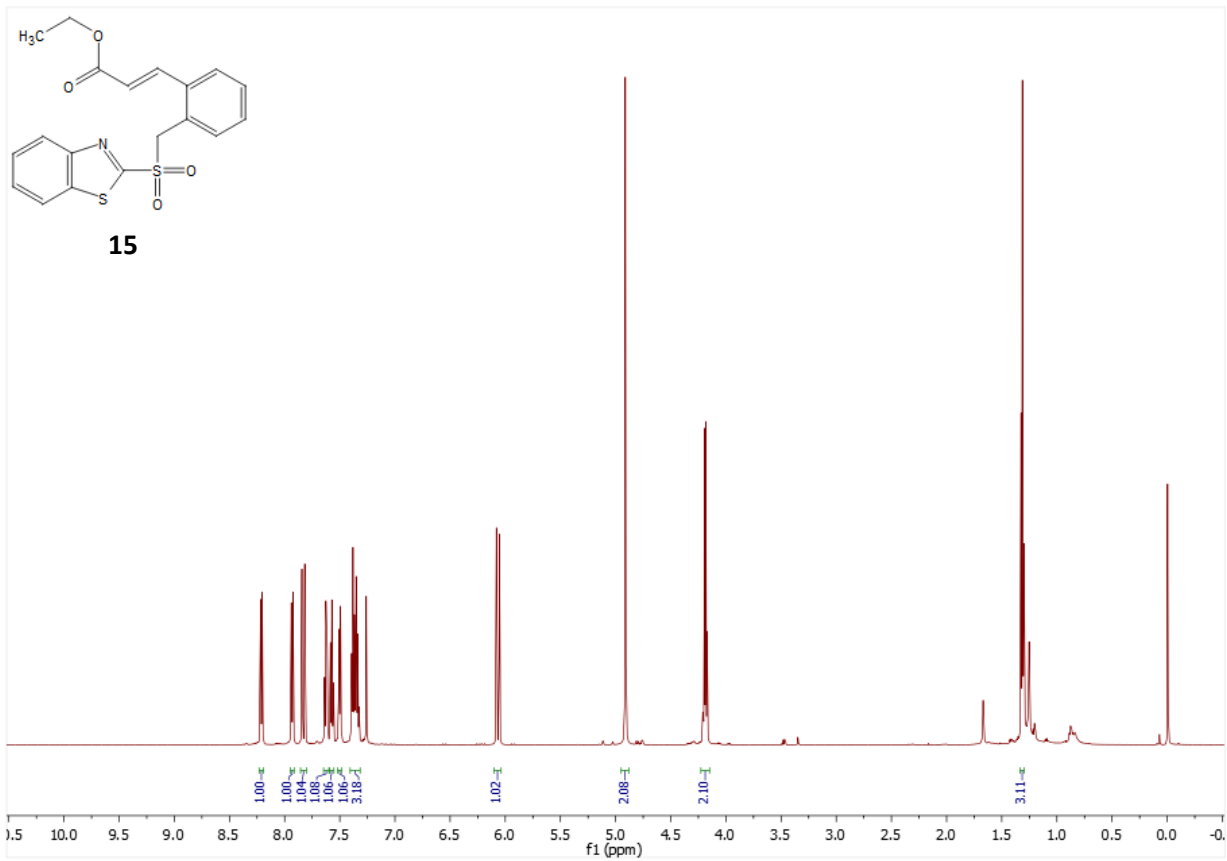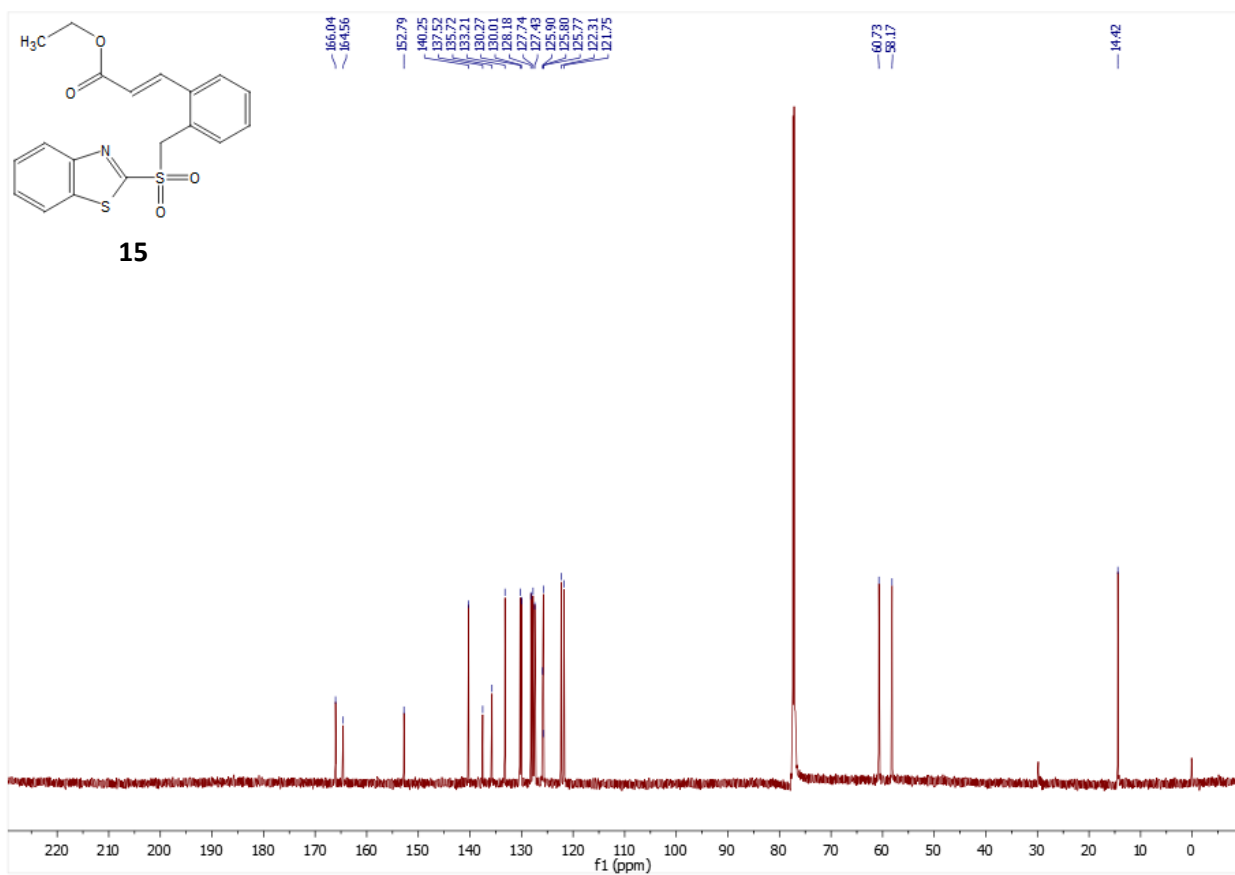

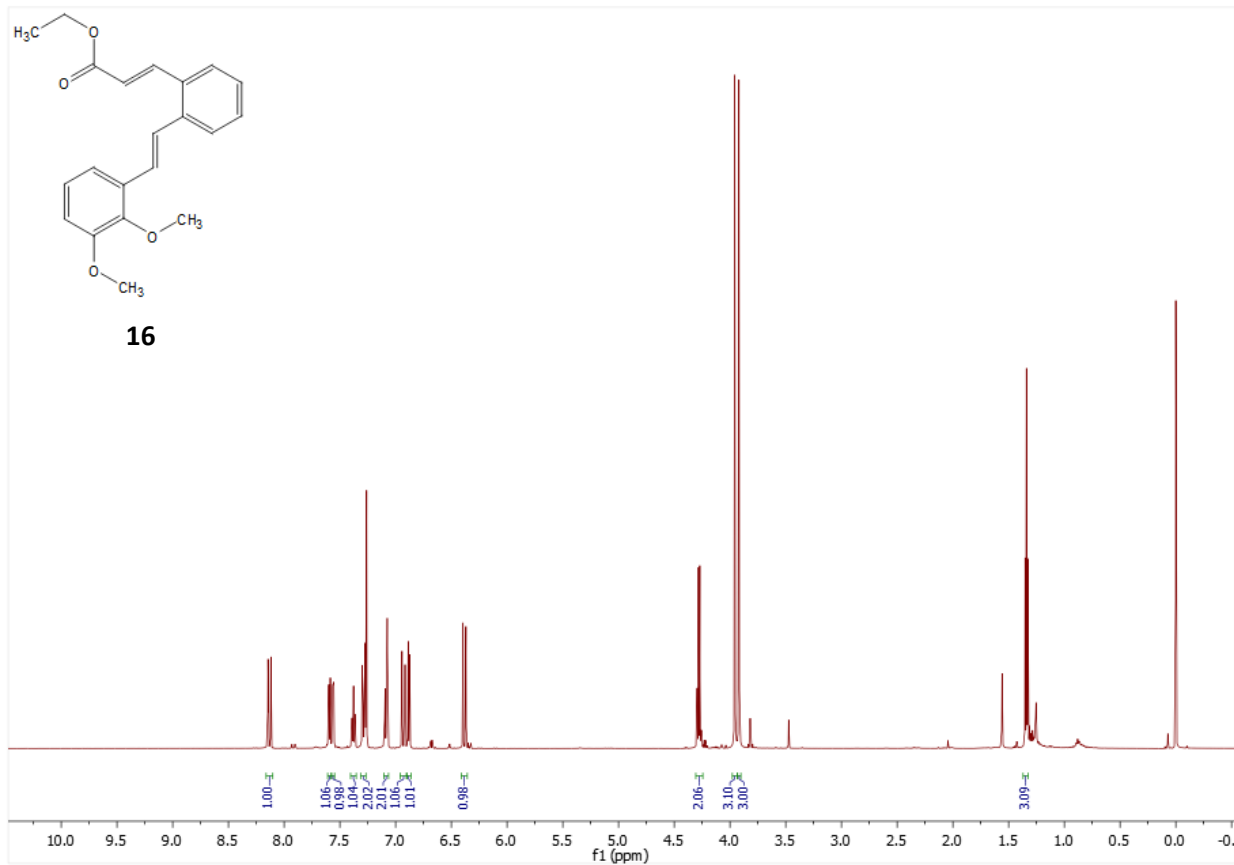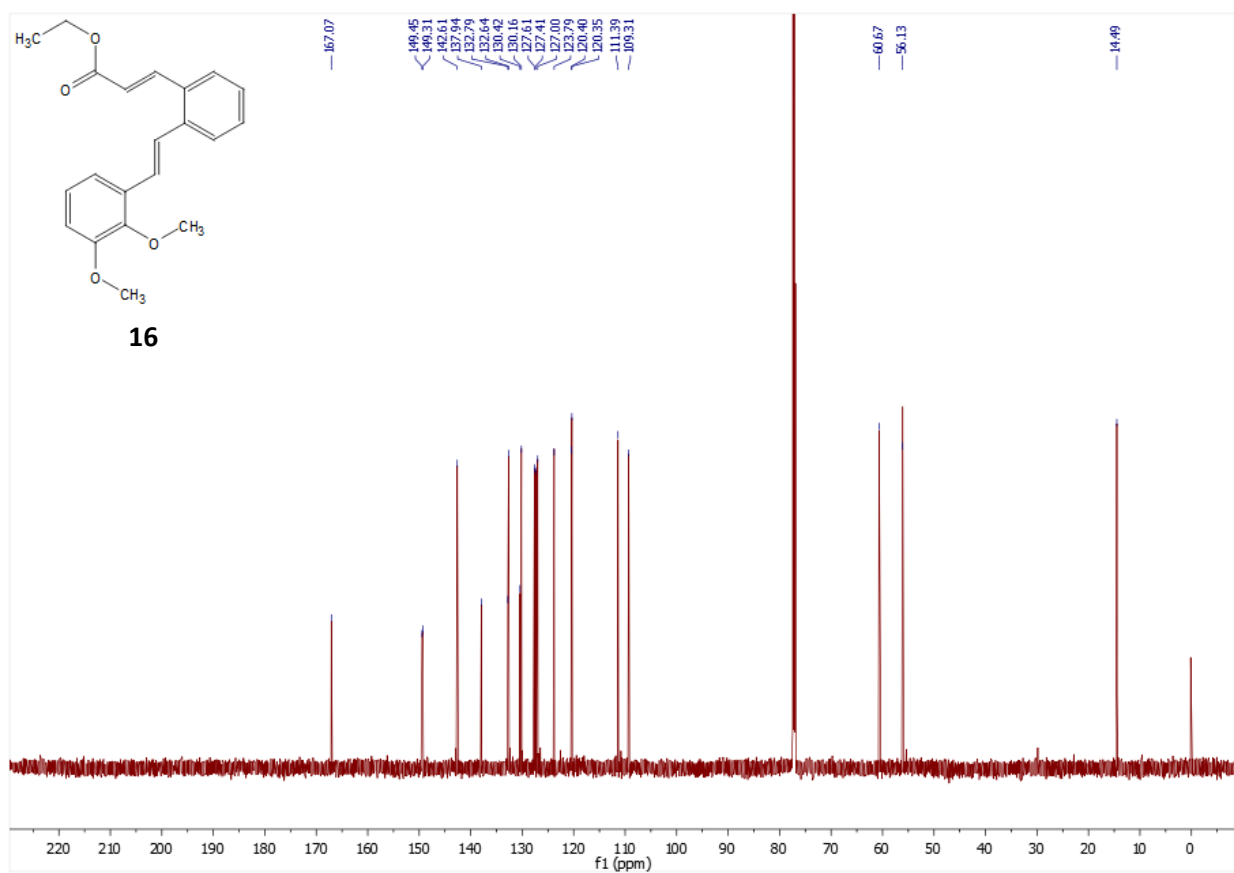

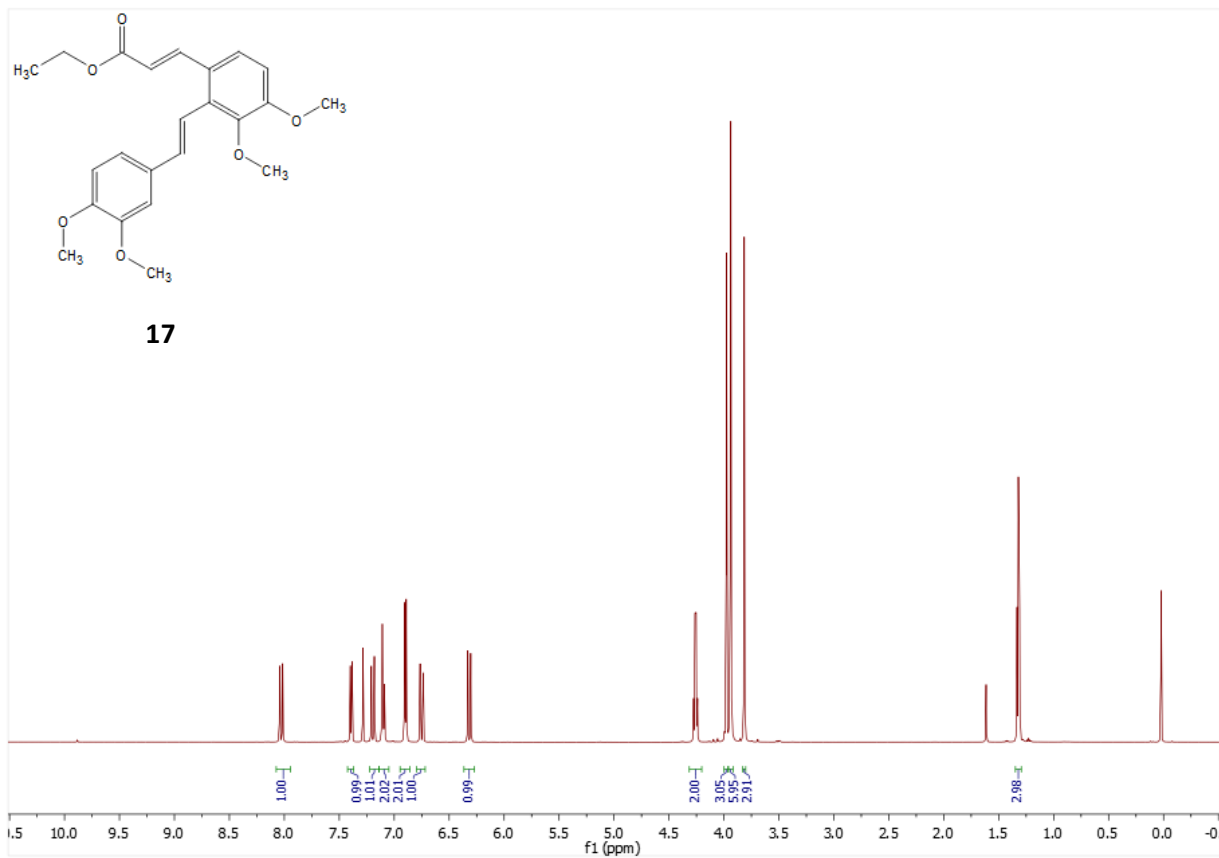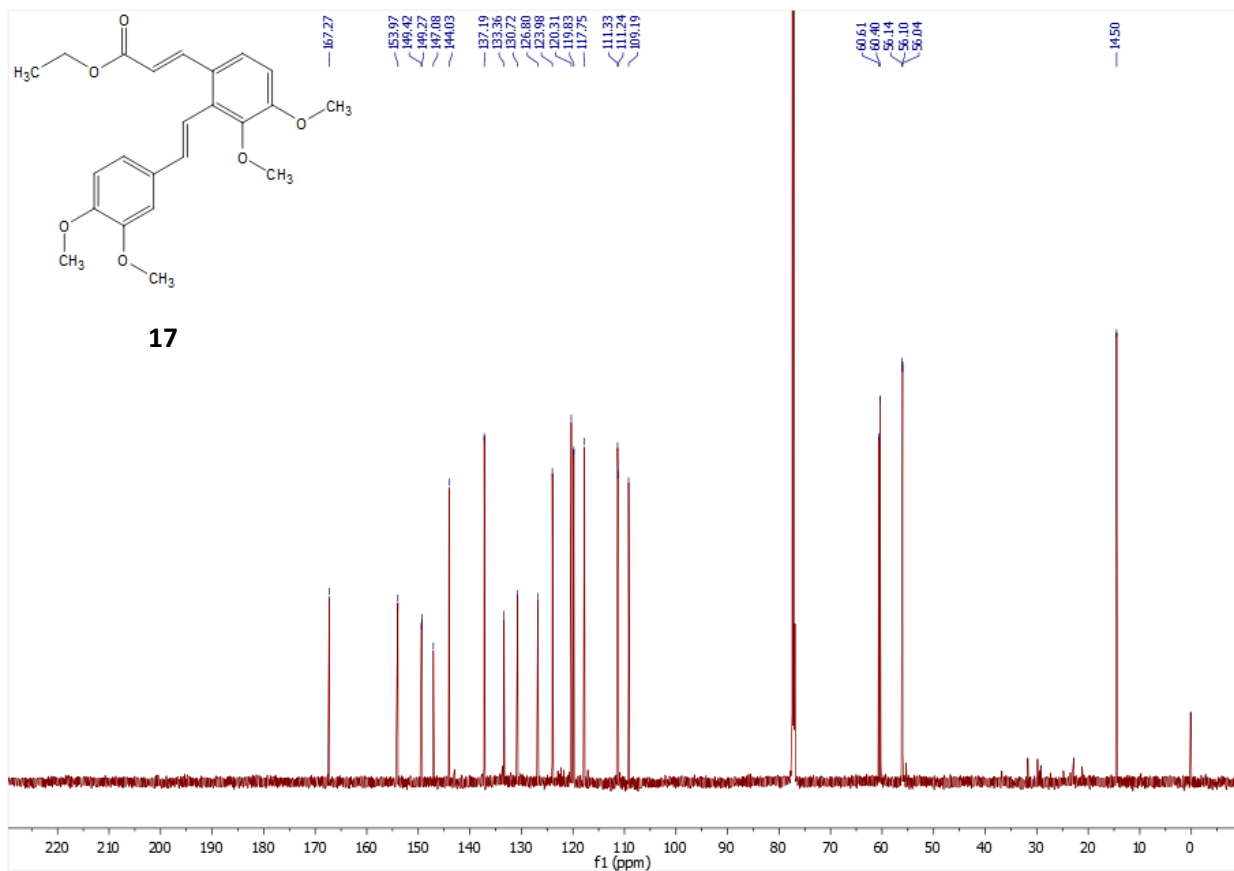

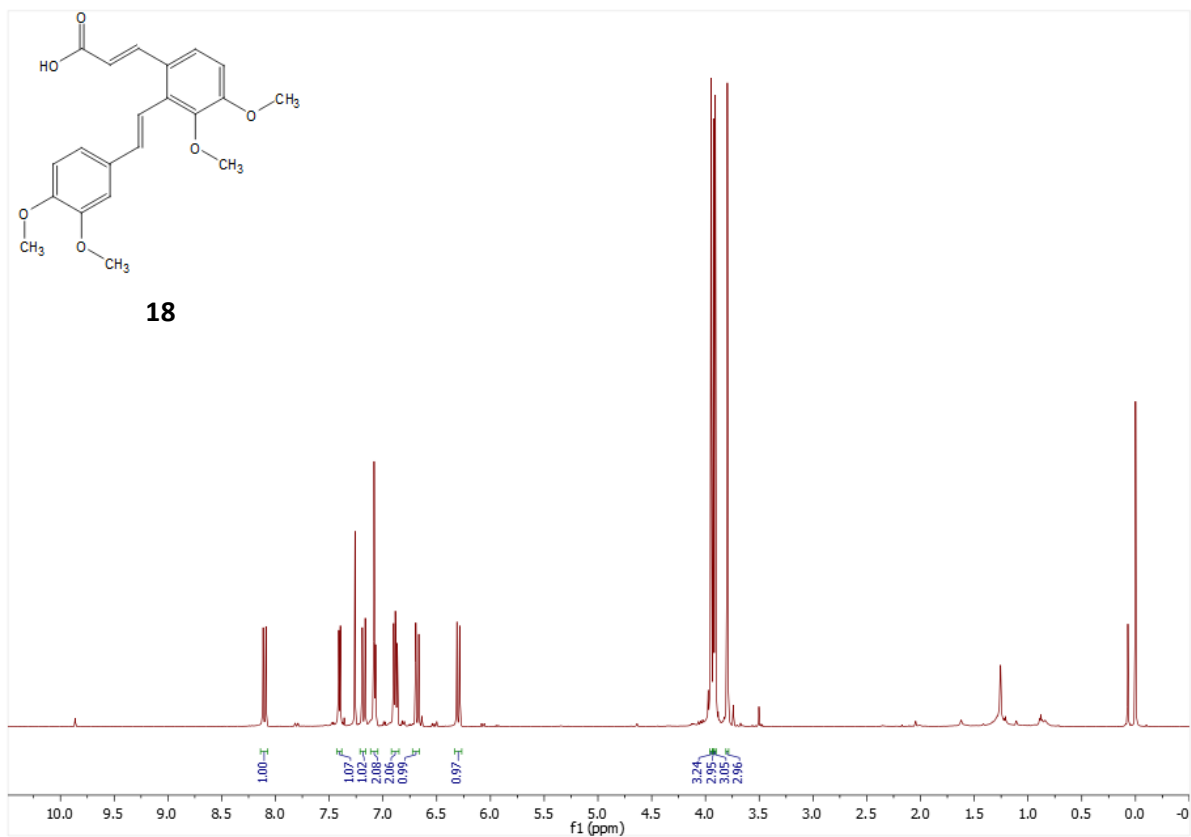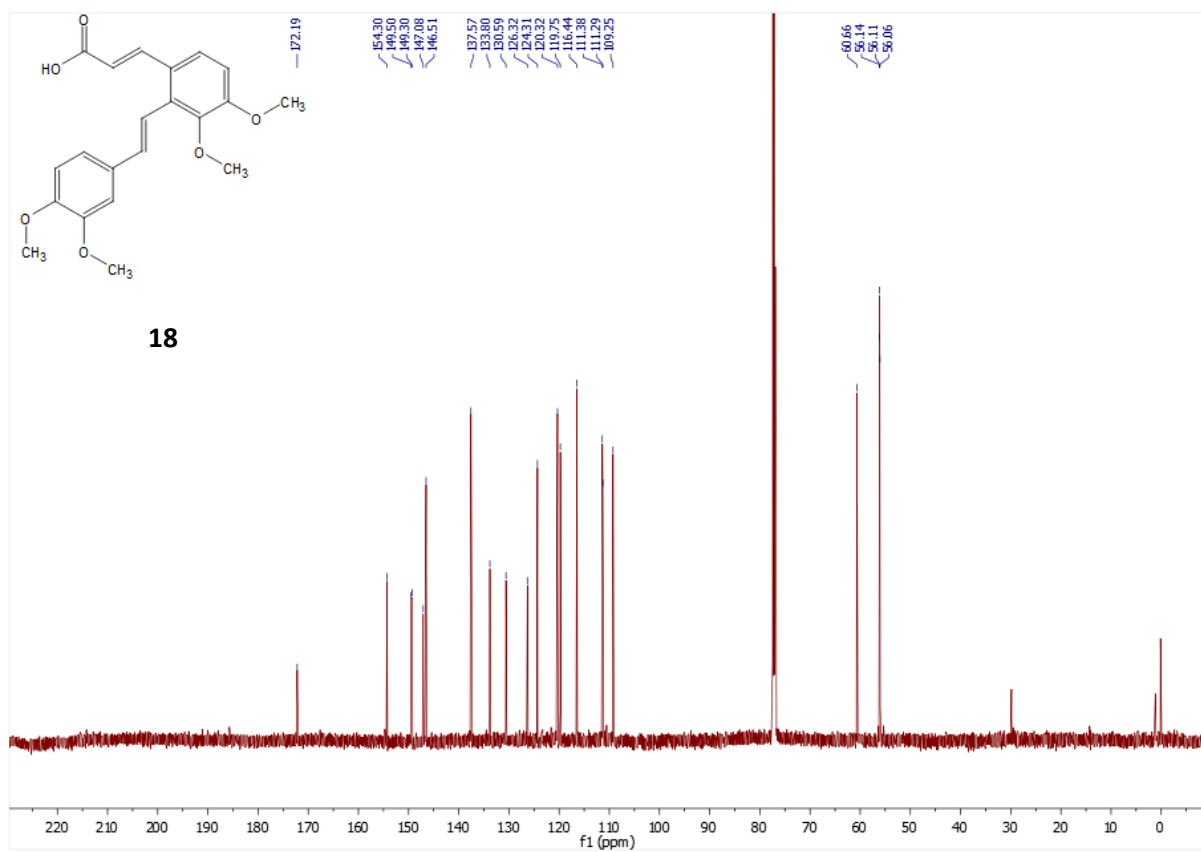

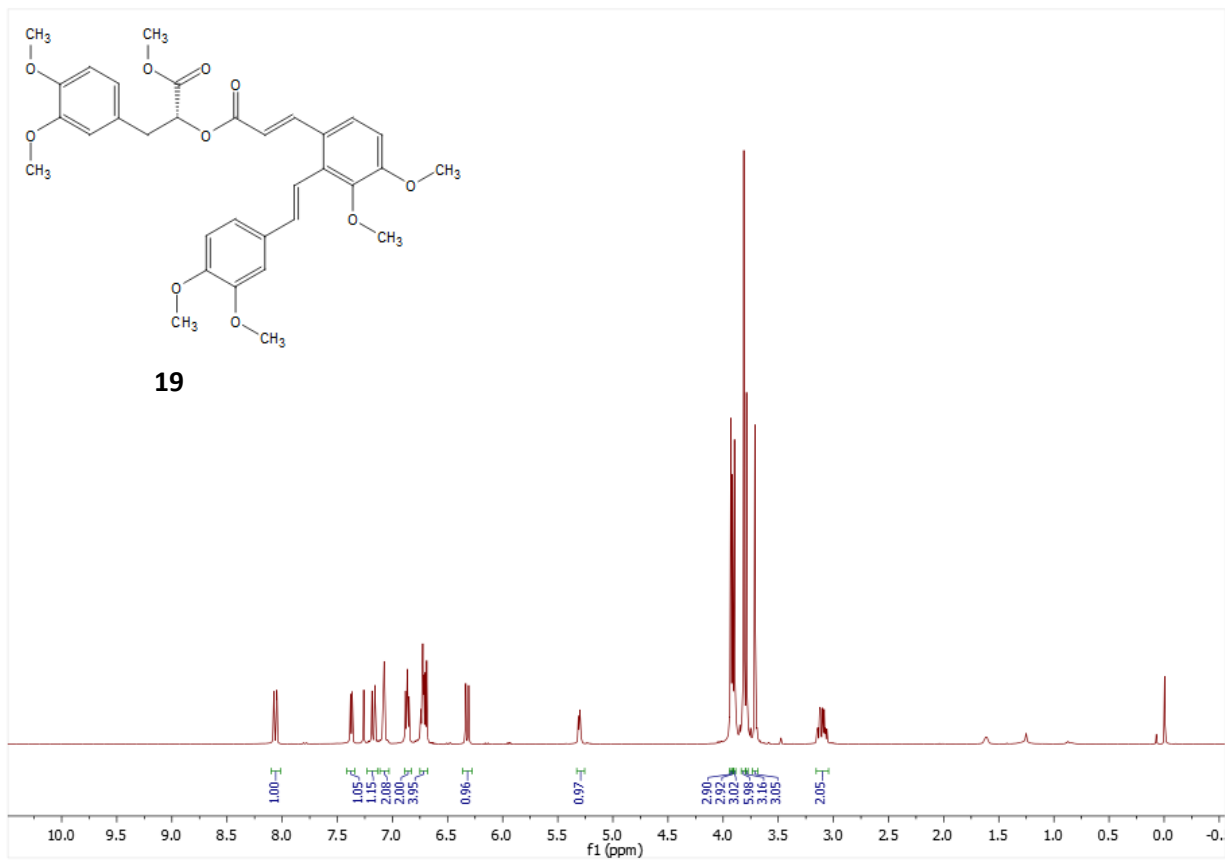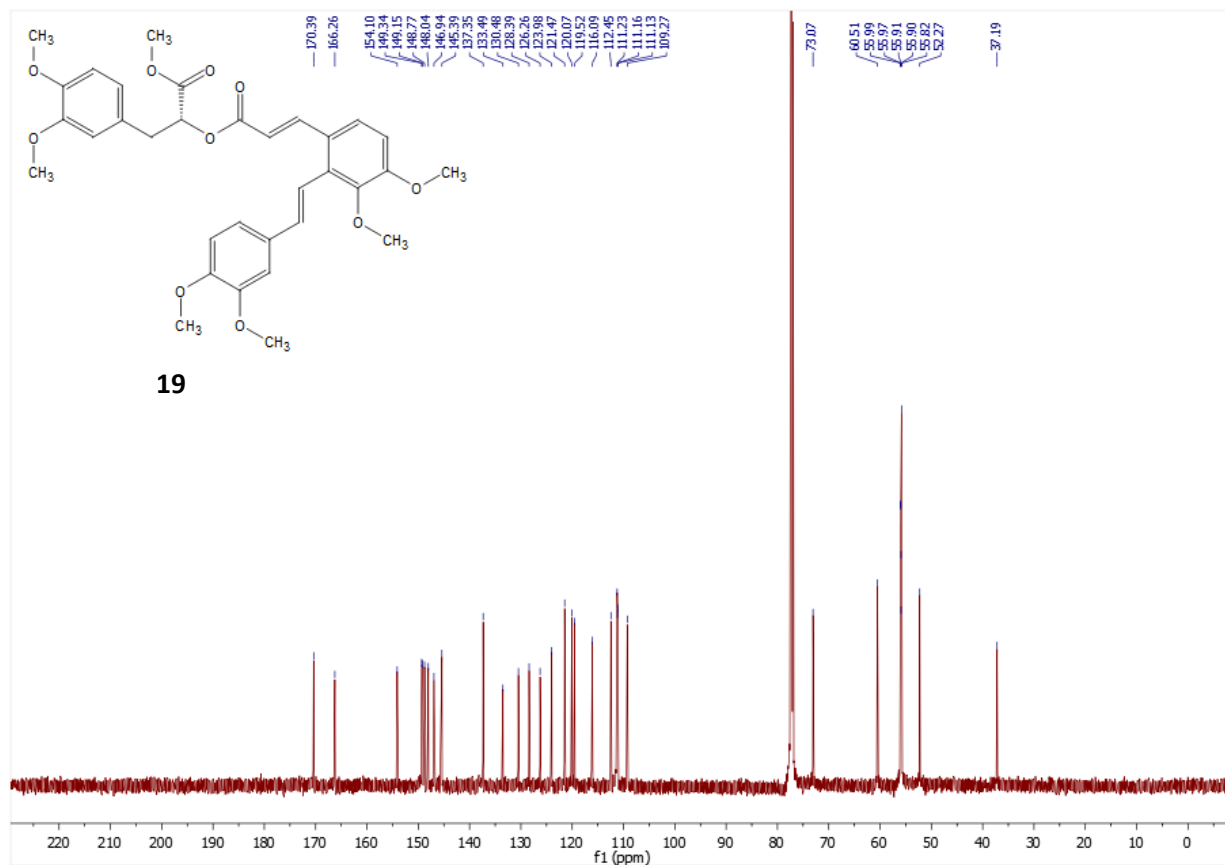



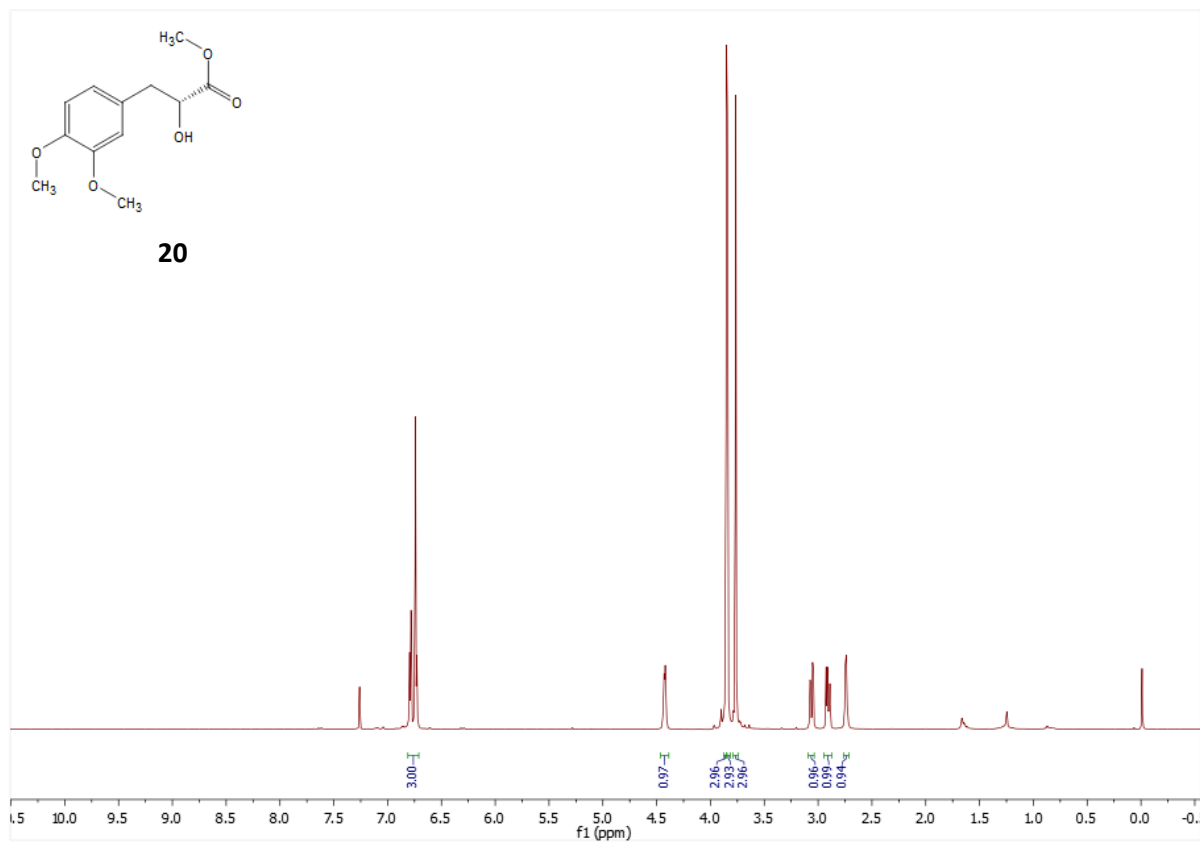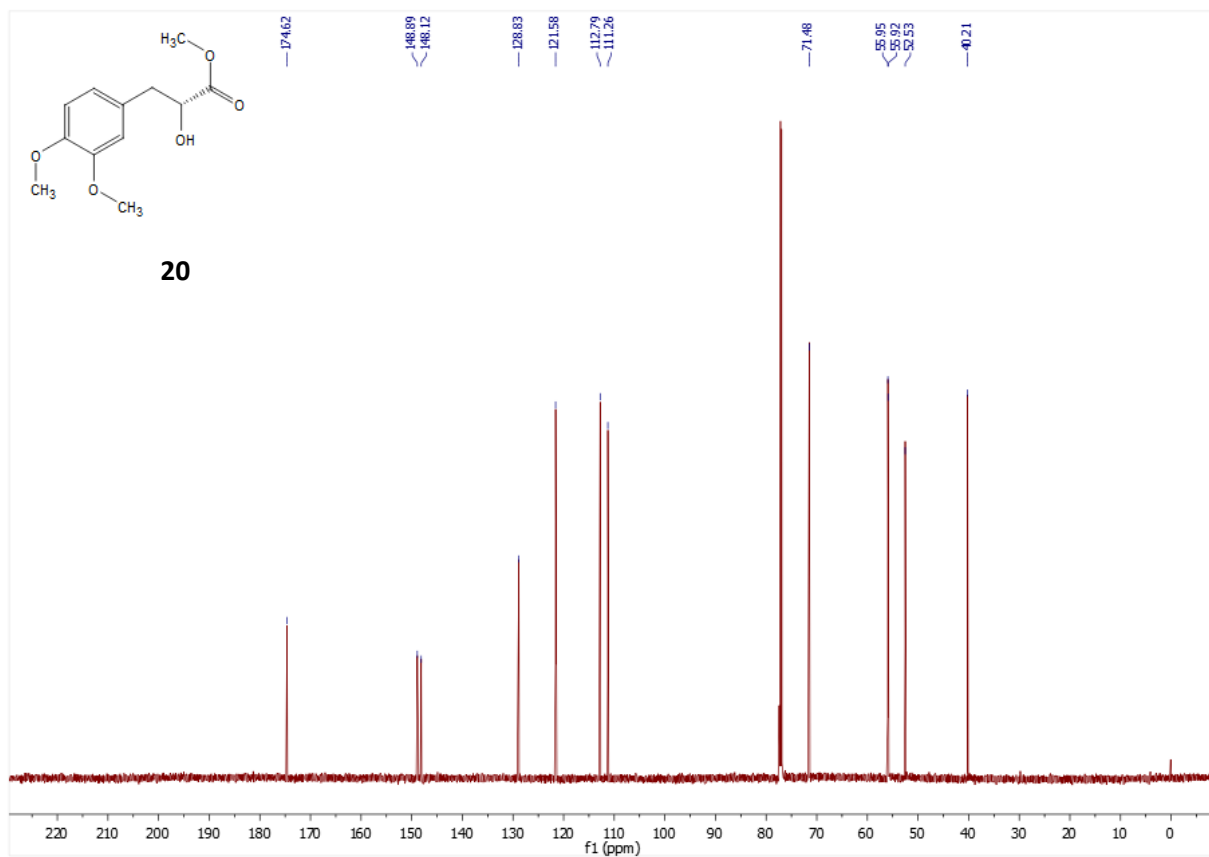

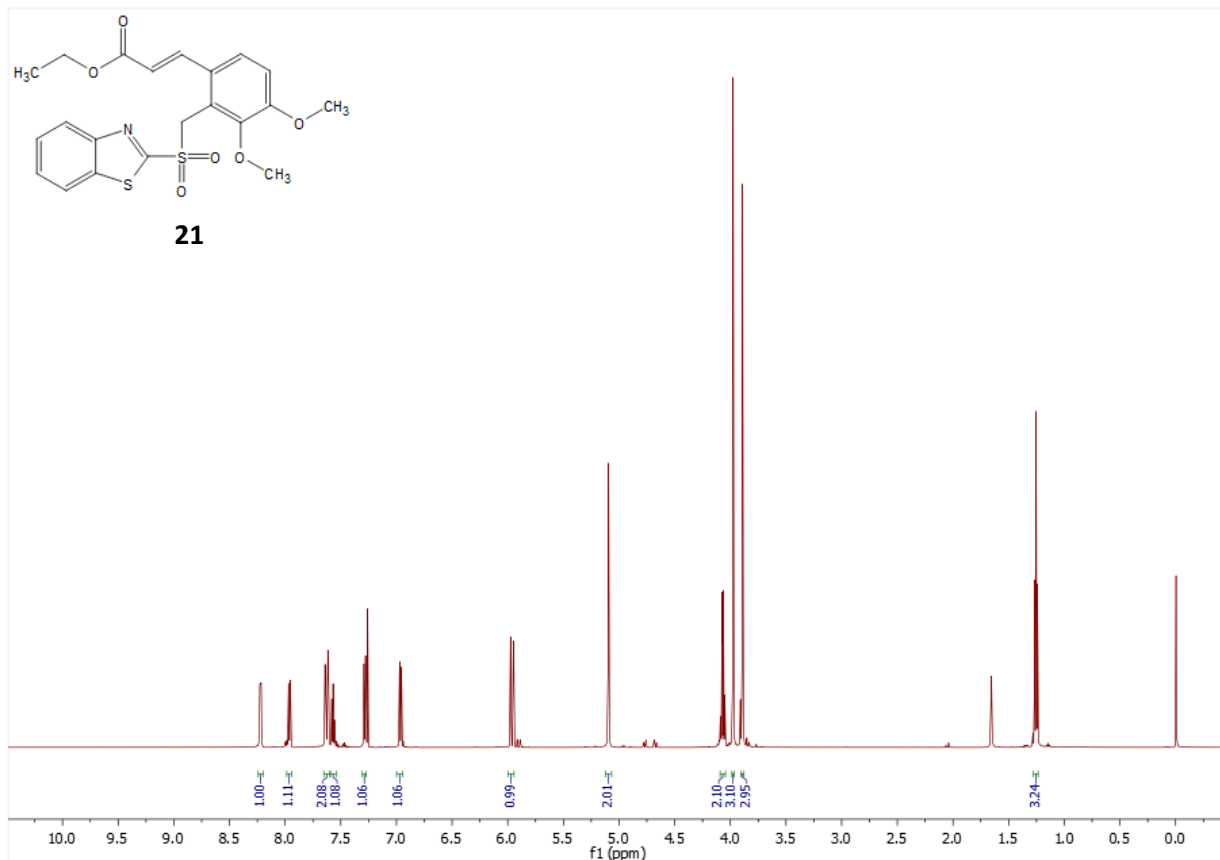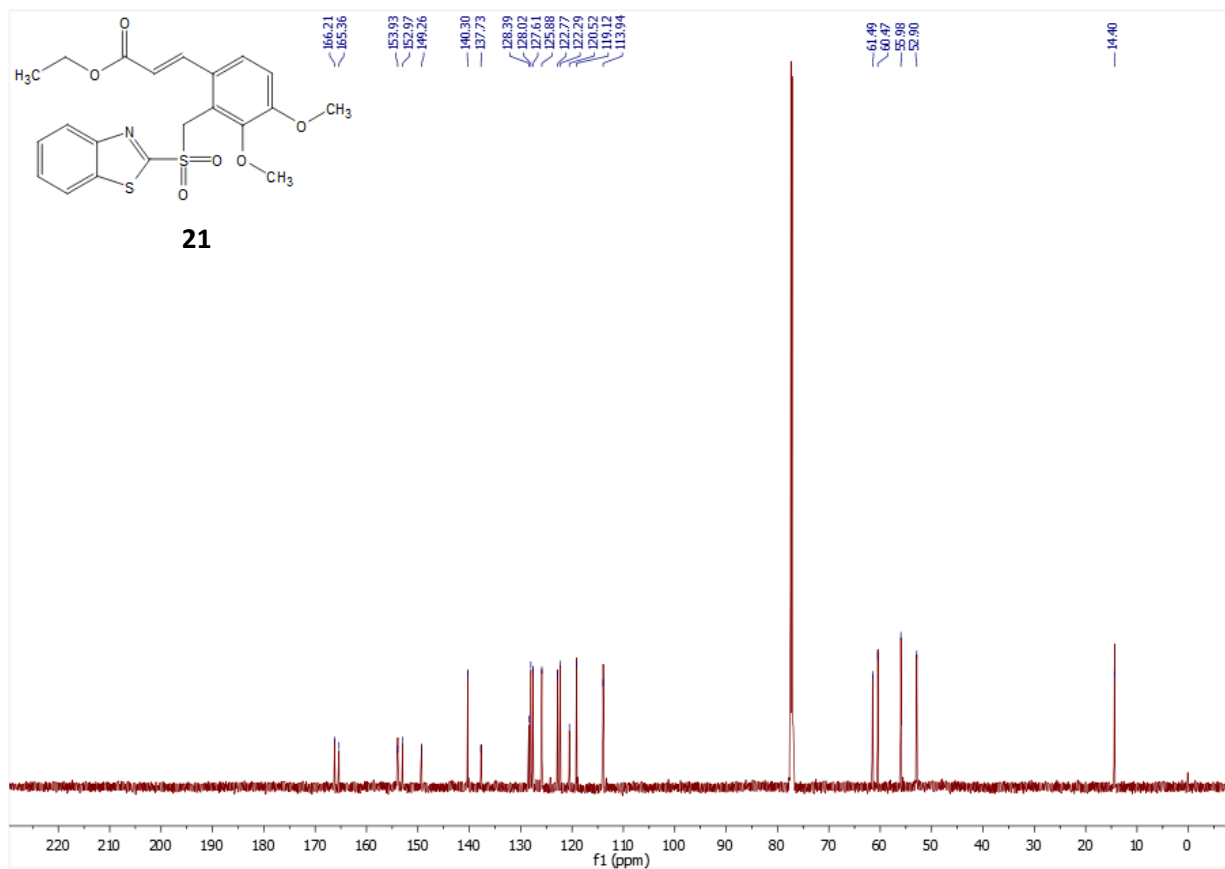

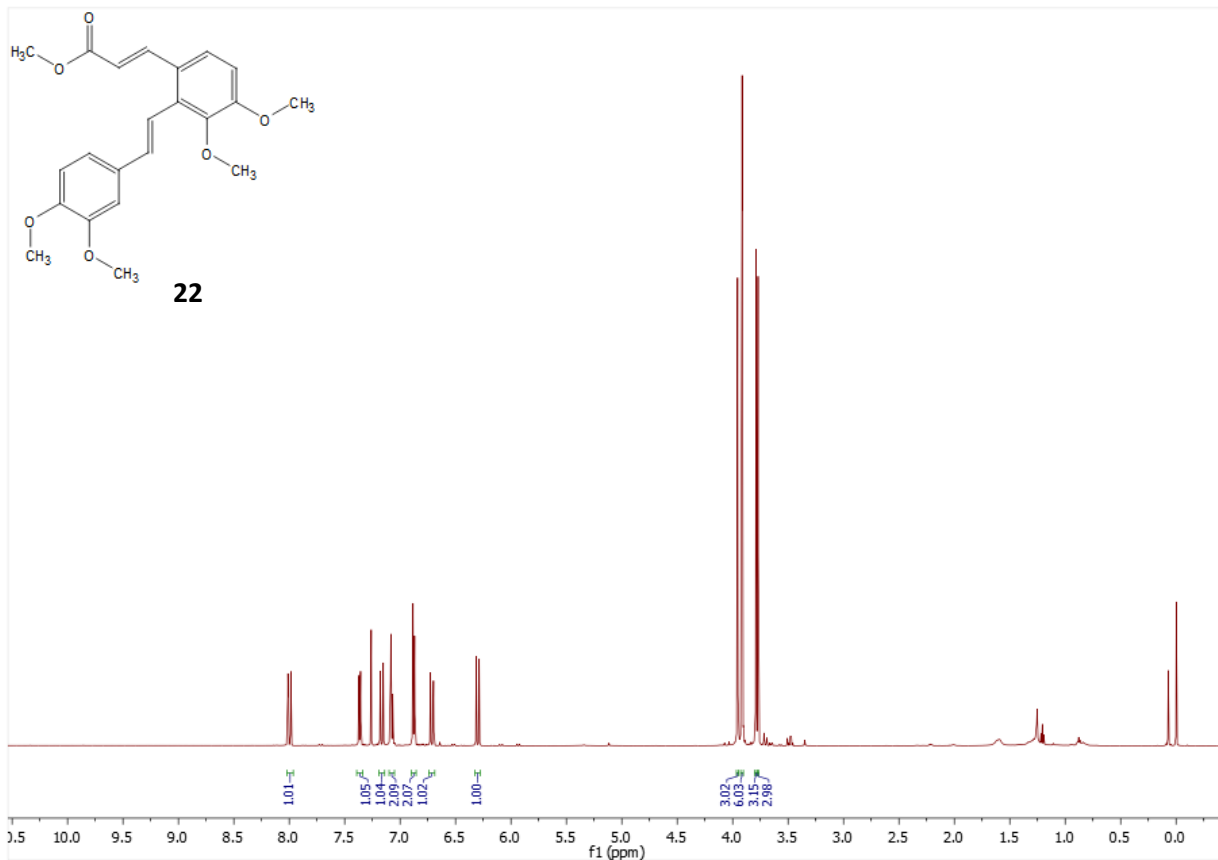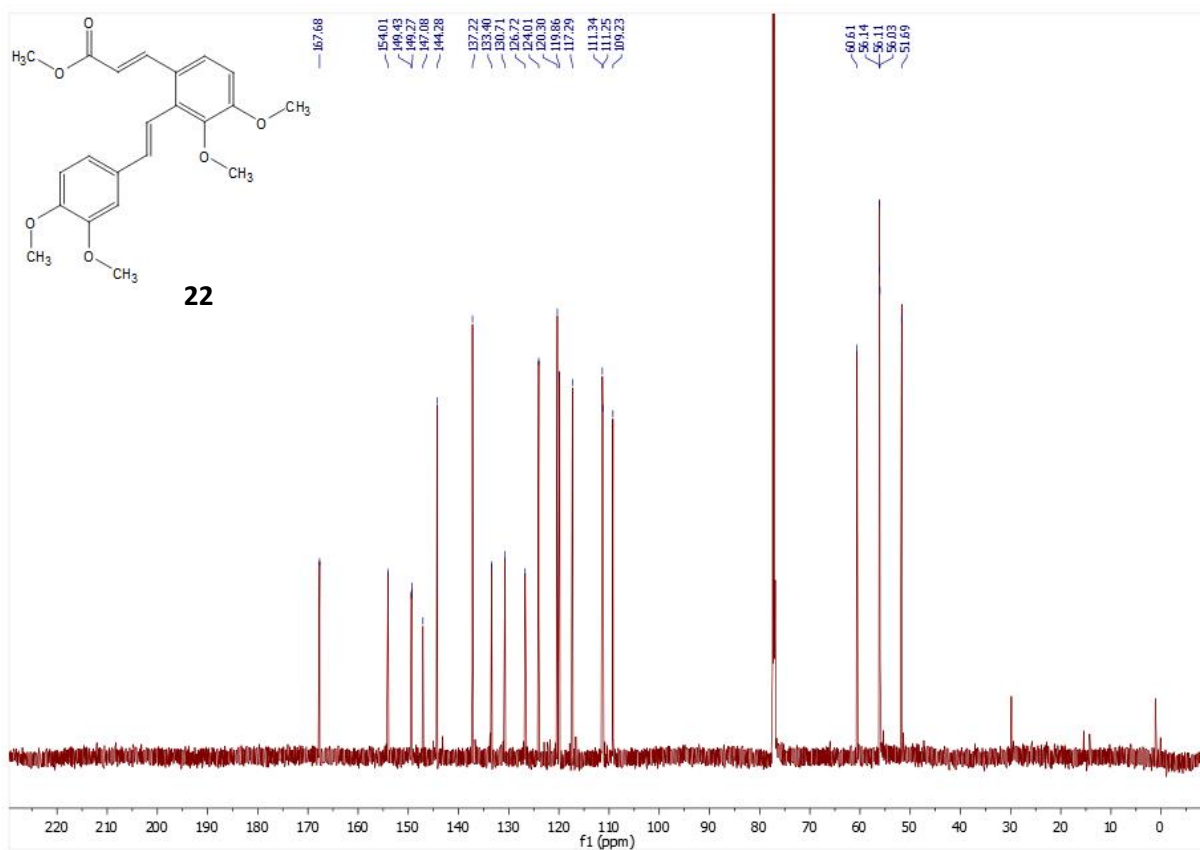

---
